# Supplementary material for: Module 7: Multilevel Models for Binary Responses (Technical Appendix: A Primer on Estimation of Multilevel Binary Response Models)
Source: Royal Society of Chemistry journal article supplement (doi:10.1039/c9fo02861g), 2009-01-01
Supplement: c9fo02861g1.xlsx [file c9fo02861g1.xlsx]

## Sheet: Protein Summary
Header	--------------------------------------------------------
Search title	Gallus TMT6plex Jan15
Timestamp	2015-02-03T15:31:31Z
User	Sheng
Email	sz14
Report URI	http://mascot.biotech.cornell.edu/mascot/cgi/master_results.pl?file=../data/20150203/F402904.dat
Peak list data path	D:\data\20150127\Xingen10325634TMT6plexSetXZmerged.mgf
Peak list format	Mascot generic
Search type	MIS
Mascot version	2.3.02
Database	gallus
Fasta file	GallusRefSeq1Apr13.fasta
Total sequences	37321
Total residues	16201765
Sequences after taxonomy filter	37321
Number of queries	374495
Decoy	--------------------------------------------------------
			FDR %
Number of matches above identity threshold in search of real database	80755
Number of matches above identity threshold in search of decoy database	1173		1.45
Number of matches above homology threshold in search of real database	91157
Number of matches above homology threshold in search of decoy database	2417
Fixed modifications	--------------------------------------------------------
Identifier	Name	Delta	Neutral loss
1	Carbamidomethyl (C)	57.0215
2	TMT6plex (N-term)	229.163
3	TMT6plex (K)	229.163
Variable modifications	--------------------------------------------------------
Identifier	Name	Delta	Neutral loss(es)
1	Deamidated (NQ)	0.984016
2	Oxidation (M)	15.9949	0	63.9983
Search Parameters	--------------------------------------------------------
Taxonomy filter	All entries
Enzyme	Trypsin
Maximum Missed Cleavages	2
Fixed modifications	Carbamidomethyl (C),TMT6plex (N-term),TMT6plex (K)
Quantitation method	TMT 6plex_9 ratios_Yumei
Variable modifications	Deamidated (NQ),Oxidation (M)
Peptide Mass Tolerance	15
Peptide Mass Tolerance Units	ppm
Fragment Mass Tolerance	100
Fragment Mass Tolerance Units	mmu
Mass values	Monoisotopic
Instrument type	Default
Decoy database also searched	1
Format parameters	--------------------------------------------------------
Significance threshold	0.05
Max. number of hits	0
Use MudPIT protein scoring	1
Ions score cut-off	20
Include same-set proteins
Include sub-set proteins	0
Include unassigned	0
Require bold red	1
Use homology threshold	0
Group protein families	0
Re-score using Percolator	0
Protein hits	--------------------------------------------------------
prot_hit_num	prot_acc	prot_desc	prot_score	prot_mass	prot_matches	prot_matches_sig	prot_sequences	prot_sequences_sig	prot_cover	prot_pi	emPAI
1	gi|363745506	PREDICTED: ATP synthase subunit alpha, mitochondrial [Gallus gallus]	38653	67037	1349	1139	56	51	68.2	9.04	295.62	Quantitation summary for protein	129/126	0.955	392	[1.040]		130/126	0.903	364	[1.042]		131/126	0.919	392	[1.042]		129/127	1.023	389	[1.051]		130/127	0.963	365	[1.055]		131/127	1.024	391	[1.052]		129/128	0.847	395	[1.037]		130/128	0.79
2	gi|448261627	ATP synthase subunit beta, mitochondrial precursor [Gallus gallus]	37486	61692	1423	1210	42	40	80.7	5.44	1587.45	Quantitation summary for protein	129/126	0.691	1262	[1.067]		130/126	0.882	1123	[1.063]		131/126	0.75	1271	[1.058]		129/127	0.545	1267	[1.133]		130/127	0.78	1121	[1.157]		131/127	0.618	1277	[1.161]		129/128	0.606	1259	[1.094]		130/128	0.824
3	gi|63027	alpha-cardiac actin [Gallus gallus]	24342	46917	1071	890	33	31	67.6	5.23	1249.01	Quantitation summary for protein	129/126	0.739	143	1.048	*	130/126	0.674	136	1.076	*	131/126	1.08	144	1.033	*	129/127	0.966	143	[1.142]		130/127	0.944	136	[1.121]		131/127	1.446	146	[1.164]		129/128	0.886	143	[1.065]		130/128	0.807
4	gi|2506442	RecName: Full=Glyceraldehyde-3-phosphate dehydrogenase; Short=GAPDH; AltName: Full=Peptidyl-cysteine S-nitrosylase GAPDH	23739	42097	1019	833	33	28	71.2	8.71	2075.93	Quantitation summary for protein	129/126	1.146	246	[1.186]		130/126	1.135	235	[1.191]		131/126	1.108	246	[1.129]		129/127	1.05	245	[1.372]		130/127	1.021	235	[1.559]		131/127	1.057	245	[1.572]		129/128	0.835	245	[1.230]		130/128	0.817
5	gi|17225596	ATP synthase alpha subunit [Gallus gallus]	21734	67596	914	751	53	49	58	9.29	167.07	Quantitation summary for protein	129/126	0.768	2	1.006	*	130/126	1.211	2	1.076		131/126	0.724	2	1.046		129/127	0.423	2	1.03	*	130/127	0.652	2	1.102		131/127	0.415	2	1.022	*	129/128	0.65	2	1.13		130/128	1.012
6	gi|63029	a-actin [Gallus gallus]	20843	46949	965	805	33	31	67.6	5.23	632.83	Quantitation summary for protein	129/126	0.77	57	[1.041]		130/126	0.782	52	1.062	*	131/126	1.303	57	1.042	*	129/127	1.009	57	[1.085]		130/127	1.103	52	1.066	*	131/127	1.776	57	[1.117]		129/128	0.991	57	1.046		130/128	1.02
7	gi|63227	unnamed protein product [Gallus gallus]	20656	49316	800	665	29	27	62.2	5.93	201.41	Quantitation summary for protein	129/126	---	0	---		130/126	---	0	---		131/126	---	0	---		129/127	---	0	---		130/127	---	0	---		131/127	---	0	---		129/128	---	0	---		130/128	---
8	gi|211235	B-creatine kinase, partial [Gallus gallus]	20615	48255	788	661	29	27	65.4	5.78	196.55	Quantitation summary for protein	129/126	---	0	---		130/126	---	0	---		131/126	---	0	---		129/127	---	0	---		130/127	---	0	---		131/127	---	0	---		129/128	---	0	---		130/128	---
9	gi|50758110	PREDICTED: malate dehydrogenase, mitochondrial [Gallus gallus]	20613	43130	839	742	40	38	87.7	8.83	6000.1	Quantitation summary for protein	129/126	0.942	778	[1.051]		130/126	0.977	722	[1.057]		131/126	0.886	778	[1.047]		129/127	0.663	781	[1.236]		130/127	0.711	723	[1.216]		131/127	0.649	783	[1.234]		129/128	0.706	778	[1.092]		130/128	0.727
10	gi|63748	preproalbumin (serum albumin) [Gallus gallus]	19938	83097	1106	862	62	56	76.3	5.51	505.13	Quantitation summary for protein	129/126	0.817	950	[1.066]		130/126	0.775	914	[1.049]		131/126	0.494	948	[1.062]		129/127	0.718	950	[1.165]		130/127	0.671	910	[1.183]		131/127	0.453	946	[1.181]		129/128	0.59	955	[1.097]		130/128	0.555
11	gi|50803534	PREDICTED: actin, alpha skeletal muscle B isoform 2 [Gallus gallus]	19053	46969	913	758	30	30	63.9	5.16	450.33	Quantitation summary for protein	129/126	0.975	30	[1.077]		130/126	0.751	30	1.088	*	131/126	1.134	30	1.051	*	129/127	0.843	30	[1.167]		130/127	0.636	30	1.185	*	131/127	1.021	30	1.211		129/128	1.464	30	1.123	*	130/128	1.113
12	gi|8133188	voltage-dependent anion channel [Gallus gallus]	18633	36481	603	521	22	21	72.4	8.61	258.3	Quantitation summary for protein	129/126	0.89	546	[1.060]		130/126	0.89	504	[1.059]		131/126	0.721	552	[1.050]		129/127	0.828	519	[1.171]		130/127	0.81	486	[1.201]		131/127	0.69	519	[1.207]		129/128	0.578	543	[1.094]		130/128	0.571
13	gi|1334725	unnamed protein product [Gallus gallus]	17546	28733	736	608	21	17	75.7	9.47	1383.42	Quantitation summary for protein	129/126	0.67	3	1.071	*	130/126	0.547	2	1.064	*	131/126	1.123	3	1.393		129/127	0.322	3	1.191	*	130/127	0.241	2	1.419		131/127	0.561	3	1.159	*	129/128	0.687	3	1.121	*	130/128	0.511
14	gi|63007	unnamed protein product [Gallus gallus]	16145	46734	810	667	28	26	58.2	5.3	190.27	Quantitation summary for protein	129/126	0.715	54	[1.070]		130/126	0.694	53	[1.170]		131/126	1.019	54	1.05	*	129/127	0.512	54	[1.163]		130/127	0.487	53	[1.205]		131/127	0.76	54	[1.184]		129/128	0.737	54	1.072	*	130/128	0.708
15	gi|53130384	hypothetical protein RCJMB04_7g5 [Gallus gallus]	14016	73480	484	427	54	49	79.1	5.72	180.24	Quantitation summary for protein	129/126	1.065	442	[1.068]		130/126	0.959	388	[1.052]		131/126	0.97	446	[1.046]		129/127	0.731	442	[1.147]		130/127	0.652	388	[1.181]		131/127	0.688	449	[1.189]		129/128	0.734	443	[1.106]		130/128	0.655
16	gi|53130364	hypothetical protein RCJMB04_7e11 [Gallus gallus]	13128	60403	557	488	43	38	64.4	9.02	153.18	Quantitation summary for protein	129/126	1.141	497	[1.071]		130/126	0.959	479	[1.081]		131/126	0.986	497	[1.045]		129/127	1.675	491	[1.217]		130/127	1.428	472	[1.243]		131/127	1.501	492	[1.260]		129/128	0.992	499	[1.152]		130/128	0.831
17	gi|53126140	hypothetical protein RCJMB04_1a14 [Gallus gallus]	13035	99686	538	439	53	49	60.5	8.05	44.3	Quantitation summary for protein	129/126	1.257	487	[1.062]		130/126	1.149	455	[1.052]		131/126	1.213	489	[1.040]		129/127	1.726	480	[1.154]		130/127	1.604	449	[1.188]		131/127	1.731	481	[1.191]		129/128	1.584	483	[1.086]		130/128	1.459
18	gi|7248371	myosin heavy chain [Gallus gallus]	12870	272314	522	430	133	112	54.9	5.62	8.82	Quantitation summary for protein	129/126	1.335	80	[1.053]		130/126	1.296	80	1.034	*	131/126	1.475	80	[1.038]		129/127	1.862	79	1.128	*	130/127	1.768	79	1.142	*	131/127	2.143	79	1.156	*	129/128	2.002	80	[1.081]		130/128	1.916
19	gi|330417943	fructose-bisphosphate aldolase C [Gallus gallus]	12726	45006	402	361	35	33	67.6	6.2	310.25	Quantitation summary for protein	129/126	1.004	362	[1.071]		130/126	0.929	332	[1.065]		131/126	1.07	362	[1.054]		129/127	0.676	361	[1.213]		130/127	0.656	331	[1.234]		131/127	0.75	361	[1.219]		129/128	0.906	363	[1.101]		130/128	0.833
20	gi|399513978	heart fatty acid binding protein [Gallus gallus]	12560	18501	456	436	17	14	83.5	5.92	1844.98	Quantitation summary for protein	129/126	0.658	346	[1.075]		130/126	0.878	346	[1.048]		131/126	0.827	347	[1.065]		129/127	0.417	345	[1.301]		130/127	0.542	345	[1.325]		131/127	0.543	347	[1.308]		129/128	0.526	346	[1.129]		130/128	0.692
21	gi|60098851	hypothetical protein RCJMB04_12o19 [Gallus gallus]	12448	65258	457	385	28	23	53.6	8.01	25.87	Quantitation summary for protein	129/126	1.424	414	[1.042]		130/126	1.212	404	[1.038]		131/126	1.255	414	[1.034]		129/127	1.12	415	[1.081]		130/127	0.933	403	[1.098]		131/127	1.027	415	[1.096]		129/128	1.132	415	[1.068]		130/128	0.951
22	gi|212653	Ca2+ ATPase [Gallus gallus]	11890	124452	484	411	58	53	50.6	5.26	17.26	Quantitation summary for protein	129/126	1.589	223	1.057	*	130/126	1.333	206	1.044	*	131/126	1.411	223	1.037	*	129/127	1.772	218	[1.153]		130/127	1.451	204	[1.181]		131/127	1.635	218	[1.186]		129/128	1.959	217	[1.089]		130/128	1.618
23	gi|83754919	Chain A, Crystal Structure Of Aluminum-Bound Ovotransferrin At 2.15 Angstrom Resolution	10948	91268	449	361	54	46	67.6	6.7	26.55	Quantitation summary for protein	129/126	---	0	---		130/126	---	0	---		131/126	---	0	---		129/127	---	0	---		130/127	---	0	---		131/127	---	0	---		129/128	---	0	---		130/128	---
24	gi|1235668	cardiac C-protein [Gallus gallus]	10941	170783	454	388	82	74	52.4	5.96	10.28	Quantitation summary for protein	129/126	1.181	29	1.063	*	130/126	0.889	29	1.064	*	131/126	1.292	29	[1.079]		129/127	0.757	29	[1.088]		130/127	0.557	29	1.15	*	131/127	0.862	29	[1.212]		129/128	0.813	29	1.047	*	130/128	0.603
25	gi|71274077	ovotransferrin CC type [Gallus gallus]	10589	93554	422	340	52	44	63.7	7.08	20.37	Quantitation summary for protein	129/126	---	1	---		130/126	---	1	---		131/126	---	1	---		129/127	---	1	---		130/127	---	1	---		131/127	---	1	---		129/128	---	1	---		130/128	---
26	gi|1110449	myosin binding protein C [Gallus gallus]	10199	170593	425	362	81	73	51.9	6.01	9.69	Quantitation summary for protein	129/126	1.386	2	1.057		130/126	0.953	2	1.056		131/126	1.359	2	1.102		129/127	1.219	2	1.059		130/127	0.818	2	1.053		131/127	1.243	2	1.104		129/128	1.029	2	1.042		130/128	0.697
27	gi|26000436	talin [Gallus gallus]	9992	315489	330	295	90	77	39.4	5.9	2.29	Quantitation summary for protein	129/126	1.528	289	[1.030]		130/126	1.2	280	[1.037]		131/126	1.283	289	[1.021]		129/127	1.619	290	[1.071]		130/127	1.243	280	[1.076]		131/127	1.414	289	[1.075]		129/128	2.146	287	1.053	*	130/128	1.66
28	gi|974176	enolase [Gallus gallus]	9811	56097	360	306	37	29	62	6.17	113	Quantitation summary for protein	129/126	0.854	137	1.094	*	130/126	1.003	135	[1.129]		131/126	0.943	137	[1.065]		129/127	0.588	136	[1.305]		130/127	0.676	134	[1.335]		131/127	0.675	136	[1.360]		129/128	0.728	137	[1.120]		130/128	0.844
29	gi|211526	mitochondrial creatine kinase (EC 2.7.3.2), partial [Gallus gallus]	9620	52268	496	378	35	30	70.5	8.72	91.04	Quantitation summary for protein	129/126	1.227	371	[1.076]		130/126	1.202	346	[1.115]		131/126	1.147	374	[1.067]		129/127	0.98	372	[1.149]		130/127	0.964	343	1.218	*	131/127	0.949	376	[1.213]		129/128	1.123	372	[1.094]		130/128	1.098
30	gi|63417	alpha-globin [Gallus gallus]	9445	18492	442	389	18	17	84.4	7.01	5946.12	Quantitation summary for protein	129/126	---	0	---		130/126	---	0	---		131/126	---	0	---		129/127	---	0	---		130/127	---	0	---		131/127	---	0	---		129/128	---	0	---		130/128	---
31	gi|53128721	hypothetical protein RCJMB04_5b19 [Gallus gallus]	9274	33148	224	208	18	16	49.3	8.68	24.56	Quantitation summary for protein	129/126	0.896	5	1.179		130/126	1.051	5	1.127		131/126	0.989	5	1.084		129/127	1.882	5	[1.395]		130/127	2.287	4	1.182	*	131/127	2.296	4	1.202	*	129/128	0.885	5	1.043	*	130/128	1.025
32	gi|53128146	hypothetical protein RCJMB04_4j7 [Gallus gallus]	9243	48129	362	304	37	34	70	8.02	242.86	Quantitation summary for protein	129/126	1.262	322	1.086	*	130/126	1.198	299	[1.096]		131/126	1.222	324	[1.089]		129/127	1.673	326	[1.355]		130/127	1.57	296	[1.336]		131/127	1.656	329	[1.385]		129/128	1.465	323	[1.192]		130/128	1.379
33	gi|196049779	Chain E, Chicken Cytochrome Bc1 Complex Inhibited By An Iodinated Analogue Of The Polyketide Crocacin-d	9238	24501	226	210	14	13	46.9	6.07	51.48	Quantitation summary for protein	129/126	0.971	12	1.139		130/126	1.046	12	1.089		131/126	1.09	12	1.122	*	129/127	0.693	12	1.263	*	130/127	0.729	12	1.272	*	131/127	0.782	11	1.219	*	129/128	0.686	12	1.184	*	130/128	0.728
34	gi|50982399	annexin A6 [Gallus gallus]	9152	88183	350	298	64	57	77.7	5.57	60.88	Quantitation summary for protein	129/126	0.957	125	[1.061]		130/126	0.805	113	1.054	*	131/126	1.058	125	[1.048]		129/127	0.758	125	[1.223]		130/127	0.635	113	[1.265]		131/127	0.873	125	[1.259]		129/128	0.967	125	[1.131]		130/128	0.812
35	gi|113990	RecName: Full=Apolipoprotein A-I; Short=Apo-AI; Short=ApoA-I; AltName: Full=Apolipoprotein A1; Flags: Precursor	9042	36161	602	415	48	40	90.9	5.58	6387.76	Quantitation summary for protein	129/126	0.712	46	1.182	*	130/126	1.103	46	[1.137]		131/126	0.466	46	1.161	*	129/127	0.43	45	[1.811]		130/127	0.652	45	[1.878]		131/127	0.293	45	[1.823]		129/128	0.522	46	1.438	*	130/128	0.798
36	gi|266596	RecName: Full=Myosin heavy chain, cardiac muscle isoform	8836	159840	403	322	99	81	70.4	5.18	17.03	Quantitation summary for protein	129/126	1.544	9	1.182	*	130/126	1.05	9	1.1		131/126	1.468	9	1.152	*	129/127	1.653	8	1.305	*	130/127	1.033	8	1.523		131/127	1.491	8	1.631		129/128	2.223	9	1.286	*	130/128	1.49
37	gi|63013	alpha-D globin [Gallus gallus]	8716	18291	373	336	15	14	84.4	7.01	1022.89	Quantitation summary for protein	129/126	0.835	3	1.097		130/126	1.433	3	1.106	*	131/126	0.651	3	1.017	*	129/127	0.389	3	1.104	*	130/127	0.652	3	1.131	*	131/127	0.315	3	1.041	*	129/128	0.527	3	1.083	*	130/128	0.892
38	gi|2737971	CFR-associated protein p70 [Gallus gallus]	8609	98713	367	322	44	40	59.1	9.19	15.56	Quantitation summary for protein	129/126	1.783	334	[1.062]		130/126	1.524	315	[1.047]		131/126	1.306	334	[1.037]		129/127	1.714	331	[1.113]		130/127	1.436	313	[1.121]		131/127	1.306	331	[1.126]		129/128	1.503	335	[1.083]		130/128	1.268
39	gi|363744134	PREDICTED: NAD(P) transhydrogenase, mitochondrial [Gallus gallus]	8434	128082	331	280	49	44	40.7	6.97	10.82	Quantitation summary for protein	129/126	1.871	309	[1.070]		130/126	1.374	304	[1.048]		131/126	1.324	309	1.047	*	129/127	2.033	306	[1.187]		130/127	1.462	302	[1.207]		131/127	1.491	306	[1.213]		129/128	2.279	308	[1.112]		130/128	1.654
40	gi|211827	78-kD glucose-regulated protein precursor [Gallus gallus]	8410	86067	393	316	55	46	61.2	5.12	25.86	Quantitation summary for protein	129/126	0.851	321	[1.033]		130/126	0.894	301	1.032	*	131/126	1.029	322	[1.027]		129/127	0.701	322	[1.103]		130/127	0.734	301	[1.108]		131/127	0.882	323	[1.117]		129/128	0.958	322	[1.048]		130/128	1.002
41	gi|125608	RecName: Full=Pyruvate kinase muscle isozyme	8409	66913	348	298	37	33	59.1	7.29	40.98	Quantitation summary for protein	129/126	1.118	312	[1.062]		130/126	0.954	294	[1.065]		131/126	1.106	312	[1.047]		129/127	1.185	307	[1.184]		130/127	1.082	292	[1.194]		131/127	1.219	307	[1.230]		129/128	1.182	311	[1.088]		130/128	1.029
42	gi|363735083	PREDICTED: enoyl-CoA hydratase, mitochondrial [Gallus gallus]	8342	36078	304	246	26	23	70.1	8.96	87.43	Quantitation summary for protein	129/126	1.075	264	[1.065]		130/126	0.97	252	[1.059]		131/126	0.957	266	[1.039]		129/127	0.722	265	[1.197]		130/127	0.79	251	[1.226]		131/127	0.674	265	[1.231]		129/128	0.624	266	[1.108]		130/128	0.654
43	gi|63014	alpha-A globin [Gallus gallus]	8319	18512	395	313	13	12	75.4	8.54	483.8	Quantitation summary for protein	129/126	0.792	93	1.129	*	130/126	0.708	90	1.136	*	131/126	0.562	93	[1.124]		129/127	0.316	93	[1.251]		130/127	0.273	90	1.357	*	131/127	0.233	93	1.311	*	129/128	0.523	93	[1.151]		130/128	0.456
44	gi|153792017	tubulin beta-3 chain [Gallus gallus]	8130	53952	426	371	27	23	57.8	4.78	162.38	Quantitation summary for protein	129/126	1.151	19	1.03	*	130/126	0.835	20	1.061	*	131/126	1.017	21	1.033	*	129/127	1.1	21	[1.190]		130/127	0.827	20	[1.162]		131/127	1.009	21	[1.205]		129/128	1.665	21	[1.146]		130/128	1.216
45	gi|63639	myosin alkali light chain [Gallus gallus]	8122	27367	399	302	25	24	87.6	5.22	2180.67	Quantitation summary for protein	129/126	0.626	286	[1.068]		130/126	0.489	267	[1.086]		131/126	1.034	286	[1.047]		129/127	1.024	281	[1.210]		130/127	0.816	261	[1.222]		131/127	1.757	281	[1.263]		129/128	1.487	287	[1.127]		130/128	1.164
46	gi|118099965	PREDICTED: ATP synthase subunit d, mitochondrial isoform 1 [Gallus gallus]	8047	21998	331	295	25	19	94.4	8.73	1609.55	Quantitation summary for protein	129/126	0.769	307	[1.115]		130/126	0.916	290	[1.147]		131/126	0.773	306	[1.071]		129/127	0.433	306	[1.228]		130/127	0.51	287	[1.255]		131/127	0.451	304	[1.235]		129/128	0.565	309	[1.139]		130/128	0.665
47	gi|63516	unnamed protein product [Gallus gallus]	7836	102968	312	259	48	37	46.7	5.01	12.84	Quantitation summary for protein	129/126	0.928	217	[1.039]		130/126	0.934	214	[1.030]		131/126	1.138	217	1.029	*	129/127	1.306	215	[1.127]		130/127	1.293	213	[1.141]		131/127	1.663	215	[1.154]		129/128	1.228	217	[1.069]		130/128	1.221
48	gi|63167	unnamed protein product [Gallus gallus]	7773	53762	409	353	26	22	57.7	4.78	85.69	Quantitation summary for protein	129/126	1.087	27	1.045	*	130/126	0.892	27	1.092	*	131/126	1.036	27	[1.083]		129/127	0.777	27	1.481	*	130/127	0.623	27	1.475	*	131/127	0.769	27	1.487	*	129/128	1.373	27	[1.208]		130/128	1.111
49	gi|2996407	heat shock cognate 70 [Gallus gallus]	7754	83386	406	303	42	40	54.6	5.47	33.77	Quantitation summary for protein	129/126	0.918	198	[1.039]		130/126	0.961	190	[1.048]		131/126	1.133	199	1.03	*	129/127	0.669	199	[1.150]		130/127	0.694	190	[1.160]		131/127	0.853	201	[1.167]		129/128	1.014	199	1.07	*	130/128	1.051
50	gi|363728718	PREDICTED: ATP synthase subunit O, mitochondrial isoform 2 [Gallus gallus]	7749	29191	299	253	23	20	68.1	9.85	806.92	Quantitation summary for protein	129/126	0.952	266	[1.061]		130/126	0.963	253	1.046	*	131/126	0.939	266	[1.046]		129/127	0.311	266	[1.250]		130/127	0.476	252	[1.252]		131/127	0.319	265	[1.262]		129/128	0.662	268	[1.138]		130/128	0.728
51	gi|118085057	PREDICTED: acetyl-CoA acetyltransferase A, mitochondrial [Gallus gallus]	7596	51394	247	218	35	31	63.7	9.12	81.48	Quantitation summary for protein	129/126	0.841	215	[1.068]		130/126	1.025	182	[1.052]		131/126	1.066	220	[1.065]		129/127	1.099	220	[1.250]		130/127	1.384	182	1.267	*	131/127	1.389	225	[1.275]		129/128	1.016	219	[1.143]		130/128	1.254
52	gi|63104	unnamed protein product [Gallus gallus]	7559	54044	400	345	25	20	54.8	4.78	83.37	Quantitation summary for protein	129/126	1.061	10	1.069	*	130/126	0.896	10	1.106	*	131/126	1.022	10	[1.081]		129/127	0.82	9	1.133	*	130/127	0.32	10	[1.345]		131/127	0.784	9	1.152	*	129/128	0.959	9	1.113		130/128	0.821
53	gi|53127328	hypothetical protein RCJMB04_1n4 [Gallus gallus]	7273	39134	301	258	21	19	54	9.74	14.74	Quantitation summary for protein	129/126	1.638	70	[1.205]		130/126	1.391	69	[1.098]		131/126	1.298	70	[1.126]		129/127	4.705	69	[1.259]		130/127	3.904	68	[1.377]		131/127	3.877	69	[1.425]		129/128	2.062	69	[1.200]		130/128	1.726
54	gi|127759	RecName: Full=Myosin-9; AltName: Full=Cellular myosin heavy chain, type A; AltName: Full=Myosin heavy chain 9; AltName: Full=Myosin heavy chain, non-muscle IIa; AltName: Full=Non-muscle myosin heavy chain A; Short=NMMHC-A; AltName: Full=Non-muscle m	7269	275571	288	260	83	77	41.2	5.47	2.32	Quantitation summary for protein	129/126	1.262	218	[1.028]		130/126	1.112	215	[1.020]		131/126	1.237	219	[1.020]		129/127	1.22	218	[1.079]		130/127	1.055	215	[1.094]		131/127	1.243	219	[1.097]		129/128	1.777	218	[1.049]		130/128	1.547
55	gi|53129915	hypothetical protein RCJMB04_6e4 [Gallus gallus]	7234	37997	254	238	17	16	50	9.73	8.56	Quantitation summary for protein	129/126	---	0	---		130/126	---	0	---		131/126	---	0	---		129/127	---	0	---		130/127	---	0	---		131/127	---	0	---		129/128	---	0	---		130/128	---
56	gi|211114	alpha-globin-A [Gallus gallus]	7094	18700	366	273	13	13	71.8	9.1	908.93	Quantitation summary for protein	129/126	0.806	55	1.081	*	130/126	0.706	56	1.133	*	131/126	0.542	56	[1.094]		129/127	0.314	56	[1.238]		130/127	0.269	56	[1.377]		131/127	0.219	56	[1.354]		129/128	0.522	55	1.105	*	130/128	0.448
57	gi|53130266	hypothetical protein RCJMB04_6k20 [Gallus gallus]	7068	62056	310	245	36	33	65.7	9.2	93.02	Quantitation summary for protein	129/126	1.011	254	[1.081]		130/126	1.016	231	[1.075]		131/126	0.921	256	[1.057]		129/127	0.861	247	[1.190]		130/127	0.847	230	[1.192]		131/127	0.816	252	[1.236]		129/128	0.891	255	[1.097]		130/128	0.883
58	gi|429535826	myosin regulatory light chain 2A, cardiac muscle isoform [Gallus gallus]	6956	22589	378	292	23	20	95.2	4.85	10356.3	Quantitation summary for protein	129/126	0.543	61	[1.084]		130/126	0.57	60	1.057	*	131/126	0.792	61	[1.057]		129/127	0.464	61	[1.200]		130/127	0.5	61	[1.217]		131/127	0.704	61	[1.233]		129/128	0.855	61	[1.151]		130/128	0.93
59	gi|3342404	lactate dehydrogenase H subunit [Gallus gallus]	6945	42652	317	268	24	21	49.5	7.07	37.81	Quantitation summary for protein	129/126	1.085	277	[1.094]		130/126	1.089	267	[1.090]		131/126	1.352	277	[1.083]		129/127	2.382	275	[1.200]		130/127	2.341	266	[1.232]		131/127	3.081	275	[1.241]		129/128	1.403	276	[1.096]		130/128	1.389
60	gi|363734519	PREDICTED: methylmalonate-semialdehyde dehydrogenase [acylating], mitochondrial [Gallus gallus]	6827	69223	257	215	30	27	52.4	6.33	21.28	Quantitation summary for protein	129/126	1.128	228	1.057	*	130/126	0.98	213	[1.092]		131/126	0.969	228	1.047	*	129/127	1.227	228	[1.162]		130/127	1.085	213	[1.195]		131/127	1.096	228	[1.175]		129/128	0.956	228	[1.076]		130/128	0.826
61	gi|53135040	hypothetical protein RCJMB04_24e12 [Gallus gallus]	6774	28646	269	228	21	20	75.1	6.97	527.57	Quantitation summary for protein	129/126	0.829	53	1.049	*	130/126	0.84	51	1.043	*	131/126	0.955	53	1.029	*	129/127	0.471	52	[1.256]		130/127	0.462	51	[1.290]		131/127	0.563	52	[1.282]		129/128	0.622	53	1.052	*	130/128	0.618
62	gi|212873	vinculin [Gallus gallus]	6741	134912	287	252	73	68	65.9	6	10.78	Quantitation summary for protein	129/126	1.108	268	[1.034]		130/126	0.872	259	[1.033]		131/126	1	268	[1.020]		129/127	1.196	266	[1.103]		130/127	0.921	259	[1.117]		131/127	1.125	266	[1.123]		129/128	1.445	267	[1.068]		130/128	1.122
63	gi|53127432	hypothetical protein RCJMB04_2f16 [Gallus gallus]	6655	108525	273	226	59	53	58.7	5.97	17.36	Quantitation summary for protein	129/126	1.358	224	[1.050]		130/126	0.999	221	[1.041]		131/126	0.913	224	[1.034]		129/127	1.686	210	1.115	*	130/127	1.187	208	[1.124]		131/127	1.154	211	[1.134]		129/128	1.468	217	1.077	*	130/128	1.063
64	gi|443542	Chain A, X-Ray Structure Refinement And Comparison Of Three Forms Of Mitochondrial Aspartate Aminotransferase	6457	51834	348	269	33	31	73.8	9.13	88.9	Quantitation summary for protein	129/126	1.451	2	1.467		130/126	1.028	2	1.201		131/126	1.029	2	1.206		129/127	0.71	2	1.215		130/127	0.492	2	1.485		131/127	0.524	2	1.478		129/128	1.239	2	1.201		130/128	0.866
65	gi|53133714	hypothetical protein RCJMB04_19j12 [Gallus gallus]	6440	127764	276	238	54	49	46.6	6.56	7.14	Quantitation summary for protein	129/126	1.158	209	[1.059]		130/126	1.058	200	1.047	*	131/126	1.241	209	[1.040]		129/127	1.341	208	1.108	*	130/127	1.2	199	1.138	*	131/127	1.494	207	[1.148]		129/128	1.551	210	1.068	*	130/128	1.402
66	gi|112981	RecName: Full=Aspartate aminotransferase, mitochondrial; Short=mAspAT; AltName: Full=Glutamate oxaloacetate transaminase 2; AltName: Full=Kynurenine aminotransferase 4; AltName: Full=Kynurenine aminotransferase IV; AltName: Full=Kynurenine--oxogluta	6431	54142	343	267	32	29	64.5	9.38	69.05	Quantitation summary for protein	129/126	---	1	---		130/126	---	1	---		131/126	---	1	---		129/127	---	1	---		130/127	---	1	---		131/127	---	1	---		129/128	---	1	---		130/128	---
67	gi|11999245	ATP synthase alpha subunit [Gallus gallus]	6309	14292	341	273	22	21	81.8	9.93	14811.9	Quantitation summary for protein	129/126	1.891	15	1.168	*	130/126	0.817	13	1.16	*	131/126	0.614	15	1.178	*	129/127	0.671	15	1.102	*	130/127	0.284	13	1.269	*	131/127	0.226	15	1.33	*	129/128	0.516	15	1.115	*	130/128	0.22
68	gi|53127356	hypothetical protein RCJMB04_1p19 [Gallus gallus]	6273	92147	325	256	63	55	63.9	5.72	28.64	Quantitation summary for protein	129/126	1.092	277	[1.067]		130/126	1.04	270	[1.064]		131/126	1.054	277	[1.046]		129/127	1.072	276	[1.156]		130/127	1.021	270	[1.190]		131/127	1.076	276	[1.193]		129/128	1.019	277	[1.083]		130/128	0.971
69	gi|134800	RecName: Full=Spectrin alpha chain, non-erythrocytic 1; AltName: Full=Alpha-II spectrin; AltName: Full=Fodrin alpha chain	6262	331589	269	233	90	84	37.8	5.21	1.93	Quantitation summary for protein	129/126	1.259	253	[1.034]		130/126	0.923	249	[1.031]		131/126	1.227	253	[1.023]		129/127	1.656	252	[1.086]		130/127	1.197	248	[1.100]		131/127	1.678	252	[1.106]		129/128	1.888	251	[1.068]		130/128	1.372
70	gi|114305	RecName: Full=Sarcoplasmic/endoplasmic reticulum calcium ATPase 1; Short=SERCA1; Short=SR Ca(2+)-ATPase 1; AltName: Full=Calcium pump 1; AltName: Full=Calcium-transporting ATPase sarcoplasmic reticulum type, fast twitch skeletal muscle isoform; AltN	6240	123039	251	201	23	22	20.8	5.25	2.91	Quantitation summary for protein	129/126	3.003	5	1.017	*	130/126	0.794	6	[1.038]		131/126	0.527	6	1.052	*	129/127	5.046	6	1.086	*	130/127	1.341	6	1.058	*	131/127	0.948	6	1.028	*	129/128	4.871	6	1.079	*	130/128	1.307
71	gi|53133742	hypothetical protein RCJMB04_19o8 [Gallus gallus]	6146	54675	290	240	31	26	46.9	8.34	79.01	Quantitation summary for protein	129/126	0.932	260	[1.073]		130/126	1.102	255	[1.051]		131/126	0.898	261	[1.050]		129/127	0.875	260	[1.179]		130/127	1.018	254	[1.206]		131/127	0.87	261	[1.216]		129/128	0.714	261	[1.099]		130/128	0.836
72	gi|363727400	PREDICTED: ATP synthase subunit gamma, mitochondrial isoform 2 [Gallus gallus]	6133	38717	310	241	17	14	50.3	9.44	59.28	Quantitation summary for protein	129/126	0.969	247	1.075	*	130/126	0.955	227	1.045	*	131/126	0.904	249	[1.054]		129/127	1.586	250	1.132	*	130/127	1.534	228	[1.162]		131/127	1.54	252	[1.194]		129/128	0.835	251	[1.109]		130/128	0.812
73	gi|53127632	hypothetical protein RCJMB04_2m8 [Gallus gallus]	5990	85807	265	219	47	41	59.9	6.09	24.13	Quantitation summary for protein	129/126	1.117	241	[1.039]		130/126	1.165	236	[1.033]		131/126	1.143	241	[1.023]		129/127	0.819	243	[1.114]		130/127	0.84	236	[1.137]		131/127	0.872	243	[1.143]		129/128	1.048	242	[1.068]		130/128	1.08
74	gi|53127436	hypothetical protein RCJMB04_2g5 [Gallus gallus]	5960	44082	321	259	32	27	59	6.92	60.52	Quantitation summary for protein	129/126	1.103	277	[1.097]		130/126	1.006	263	[1.067]		131/126	1.094	277	[1.062]		129/127	1.293	269	[1.367]		130/127	1.153	256	[1.404]		131/127	1.334	269	[1.426]		129/128	1.004	276	[1.162]		130/128	0.903
75	gi|63359	cytochrome C [Gallus gallus]	5865	16171	254	218	17	16	79	9.52	5138.78	Quantitation summary for protein	129/126	0.768	230	[1.086]		130/126	0.927	224	[1.091]		131/126	0.748	230	[1.064]		129/127	0.757	230	[1.270]		130/127	0.92	224	[1.303]		131/127	0.767	230	[1.329]		129/128	0.755	231	[1.173]		130/128	0.907
76	gi|118102025	PREDICTED: dihydrolipoyllysine-residue acetyltransferase component of pyruvate dehydrogenase complex, mitochondrial [Gallus gallus]	5847	81269	235	206	27	26	38.8	8.84	9.32	Quantitation summary for protein	129/126	1.064	212	[1.073]		130/126	0.928	203	[1.068]		131/126	1.037	212	[1.049]		129/127	0.733	212	1.228	*	130/127	0.628	203	[1.234]		131/127	0.743	212	[1.262]		129/128	0.735	214	[1.149]		130/128	0.634
77	gi|136056	RecName: Full=Triosephosphate isomerase; Short=TIM; AltName: Full=Triose-phosphate isomerase	5824	32103	217	182	23	23	78.6	6.71	83.26	Quantitation summary for protein	129/126	---	0	---		130/126	---	0	---		131/126	---	0	---		129/127	---	0	---		130/127	---	0	---		131/127	---	0	---		129/128	---	0	---		130/128	---
78	gi|196049778	Chain D, Chicken Cytochrome Bc1 Complex Inhibited By An Iodinated Analogue Of The Polyketide Crocacin-d	5756	30130	154	141	7	7	32.8	6.32	14.29	Quantitation summary for protein	129/126	1.305	149	[1.036]		130/126	1.274	144	[1.034]		131/126	1.027	149	[1.035]		129/127	1.013	149	[1.072]		130/127	0.97	144	[1.063]		131/127	0.83	149	[1.068]		129/128	0.848	149	[1.080]		130/128	0.817
79	gi|85544000	Chain A, Avian Respiratory Complex Ii With Oxaloacetate And Ubiquinone	5750	75056	174	146	26	23	51.5	6.17	4.78	Quantitation summary for protein	129/126	1.515	8	1.08	*	130/126	1.066	8	1.084		131/126	1.025	8	1.111		129/127	2.677	8	1.149	*	130/127	1.841	8	1.221	*	131/127	1.884	8	1.228	*	129/128	1.58	8	1.093	*	130/128	1.097
80	gi|53133814	hypothetical protein RCJMB04_20j17 [Gallus gallus]	5748	90005	265	219	44	39	56.5	6.5	11.66	Quantitation summary for protein	129/126	1.244	241	[1.044]		130/126	1.125	235	1.029	*	131/126	0.973	241	[1.024]		129/127	1.379	242	[1.091]		130/127	1.25	235	1.109	*	131/127	1.122	242	[1.114]		129/128	1.212	243	[1.067]		130/128	1.095
81	gi|205831552	RecName: Full=Succinate dehydrogenase [ubiquinone] flavoprotein subunit, mitochondrial; AltName: Full=Flavoprotein subunit of complex II; Short=Fp; Flags: Precursor	5736	80670	161	142	24	21	46.5	6.65	3.54	Quantitation summary for protein	129/126	0.382	2	1.199		130/126	0.549	2	1.372		131/126	2.515	2	1.109		129/127	0.642	2	1.145		130/127	0.902	2	1.31		131/127	4.399	2	1.161	*	129/128	0.442	2	1.154		130/128	0.627
82	gi|196049775	Chain A, Chicken Cytochrome Bc1 Complex Inhibited By An Iodinated Analogue Of The Polyketide Crocacin-d	5731	54793	226	194	30	27	60.5	5.95	23.71	Quantitation summary for protein	129/126	1.091	203	[1.089]		130/126	1.11	186	[1.120]		131/126	0.989	205	[1.071]		129/127	1.413	202	[1.364]		130/127	1.638	184	[1.371]		131/127	1.332	203	[1.382]		129/128	1.336	204	[1.174]		130/128	1.41
83	gi|4699641	Chain B, R-State Form Of Chicken Hemoglobin D	5693	19016	233	198	17	17	82.2	8.85	584.54	Quantitation summary for protein	129/126	0.8	111	[1.182]		130/126	0.782	106	[1.178]		131/126	0.703	112	[1.214]		129/127	0.954	111	[1.465]		130/127	0.917	106	[1.402]		131/127	0.866	112	[1.527]		129/128	0.876	111	[1.282]		130/128	0.845
84	gi|496325	53 kDa glycoprotein [Gallus gallus]	5636	63048	258	215	28	25	53.5	6.59	22.36	Quantitation summary for protein	129/126	0.821	229	[1.068]		130/126	0.772	224	1.049	*	131/126	0.811	229	1.038	*	129/127	0.851	226	[1.235]		130/127	0.785	221	[1.279]		131/127	0.872	226	[1.271]		129/128	0.832	228	[1.129]		130/128	0.774
85	gi|118084650	PREDICTED: propionyl-CoA carboxylase alpha chain, mitochondrial [Gallus gallus]	5621	90476	195	180	47	41	63.4	7.85	7.16	Quantitation summary for protein	129/126	1.13	187	[1.039]		130/126	1.076	186	[1.029]		131/126	0.949	187	[1.033]		129/127	0.93	187	[1.085]		130/127	0.866	186	[1.110]		131/127	0.813	187	[1.116]		129/128	0.995	187	[1.048]		130/128	0.935
86	gi|3645997	apolipoprotein AIV [Gallus gallus]	5596	44495	194	166	38	34	83.1	4.8	62.48	Quantitation summary for protein	129/126	0.631	173	1.055	*	130/126	0.79	167	[1.046]		131/126	0.58	175	1.048	*	129/127	0.541	175	[1.106]		130/127	0.664	167	[1.132]		131/127	0.516	178	[1.133]		129/128	0.796	174	[1.062]		130/128	0.984
87	gi|30962014	heat shock protein 70 [Gallus gallus]	5558	83160	312	234	41	39	53.9	5.66	21.07	Quantitation summary for protein	129/126	0.897	129	1.046	*	130/126	0.908	126	[1.060]		131/126	0.84	129	[1.044]		129/127	0.896	129	[1.157]		130/127	0.887	126	[1.160]		131/127	0.873	129	[1.160]		129/128	0.905	129	1.071	*	130/128	0.904
88	gi|118104602	PREDICTED: alpha-aminoadipic semialdehyde dehydrogenase isoform 2 [Gallus gallus]	5454	64947	167	163	24	24	45.1	7.04	7.78	Quantitation summary for protein	129/126	1.364	164	[1.047]		130/126	1.296	159	[1.049]		131/126	1.144	164	[1.036]		129/127	1.016	165	[1.144]		130/127	0.943	159	[1.145]		131/127	0.886	165	[1.139]		129/128	0.945	165	[1.066]		130/128	0.885
89	gi|52695546	Chain A, Understanding Protein Lids: Structural Analysis Of Active Hinge Mutants In Triosephosphate Isomerase	5431	32258	190	162	22	22	77.3	7.26	54.3	Quantitation summary for protein	129/126	---	1	---		130/126	---	1	---		131/126	---	1	---		129/127	---	1	---		130/127	---	1	---		131/127	---	1	---		129/128	---	1	---		130/128	---
90	gi|114372	RecName: Full=Sodium/potassium-transporting ATPase subunit alpha-1; Short=Na(+)/K(+) ATPase alpha-1 subunit; AltName: Full=Sodium pump subunit alpha-1; Flags: Precursor	5397	126361	186	159	33	28	32.7	5.5	4	Quantitation summary for protein	129/126	1.519	99	[1.063]		130/126	1.222	96	1.053	*	131/126	1.43	99	1.055	*	129/127	1.296	99	[1.187]		130/127	1.028	98	[1.182]		131/127	1.269	99	[1.188]		129/128	1.816	99	[1.111]		130/128	1.453
91	gi|53133792	hypothetical protein RCJMB04_20f2 [Gallus gallus]	5373	78820	264	211	48	41	62.5	7.94	23.06	Quantitation summary for protein	129/126	1.353	223	[1.053]		130/126	1.207	214	[1.031]		131/126	1.139	223	[1.032]		129/127	1.348	221	[1.120]		130/127	1.6	213	[1.116]		131/127	1.181	222	[1.131]		129/128	1.24	222	[1.077]		130/128	1.199
92	gi|53126280	hypothetical protein RCJMB04_1c3 [Gallus gallus]	5362	100953	203	177	49	44	51.6	5.14	8.05	Quantitation summary for protein	129/126	1.168	184	[1.044]		130/126	1.043	179	[1.039]		131/126	1.24	184	[1.029]		129/127	1.107	183	[1.127]		130/127	0.979	178	[1.143]		131/127	1.224	183	[1.149]		129/128	1.135	185	[1.070]		130/128	1.005
93	gi|76443696	voltage-dependent anion-selective channel protein 1 [Gallus gallus]	5350	36474	153	138	19	17	75.6	6.85	19.9	Quantitation summary for protein	129/126	0.86	142	[1.093]		130/126	0.894	140	[1.129]		131/126	0.731	141	1.084	*	129/127	0.782	141	[1.271]		130/127	0.794	140	[1.312]		131/127	0.693	141	[1.303]		129/128	0.602	142	[1.106]		130/128	0.617
94	gi|211107	alpha-tropomyosin [Gallus gallus]	5297	41969	278	212	35	28	70.1	4.7	74.35	Quantitation summary for protein	129/126	---	0	---		130/126	---	0	---		131/126	---	0	---		129/127	---	0	---		130/127	---	0	---		131/127	---	0	---		129/128	---	0	---		130/128	---
95	gi|118082834	PREDICTED: mitochondrial 10-formyltetrahydrofolate dehydrogenase [Gallus gallus]	5293	118992	224	192	51	49	57.4	6.5	6.64	Quantitation summary for protein	129/126	1.134	199	[1.045]		130/126	1.24	198	[1.054]		131/126	1.009	199	[1.038]		129/127	1.241	199	[1.176]		130/127	1.34	198	[1.174]		131/127	1.148	199	[1.186]		129/128	1.319	199	[1.106]		130/128	1.424
96	gi|50745166	PREDICTED: trifunctional enzyme subunit beta, mitochondrial [Gallus gallus]	5037	58665	211	181	28	25	49.8	9.37	15.12	Quantitation summary for protein	129/126	1.039	188	[1.069]		130/126	1.372	181	[1.073]		131/126	1.259	188	1.052	*	129/127	1.128	186	1.192	*	130/127	1.453	179	[1.226]		131/127	1.42	186	[1.249]		129/128	1.034	188	[1.131]		130/128	1.347
97	gi|63522	inhibitor of actin polymerization [Gallus gallus]	5022	24694	251	201	17	17	82.4	5.77	208.04	Quantitation summary for protein	129/126	0.511	217	[1.115]		130/126	0.845	208	[1.099]		131/126	0.88	217	[1.073]		129/127	0.664	218	[1.181]		130/127	1.075	208	[1.259]		131/127	1.191	218	[1.270]		129/128	0.79	218	[1.107]		130/128	1.29
98	gi|53136894	hypothetical protein RCJMB04_35l12 [Gallus gallus]	4972	72844	163	148	27	25	48.7	9.12	9.35	Quantitation summary for protein	129/126	1.042	152	[1.036]		130/126	1.03	140	[1.041]		131/126	0.984	153	[1.028]		129/127	0.764	148	[1.120]		130/127	0.739	140	[1.146]		131/127	0.751	148	[1.124]		129/128	0.835	150	[1.055]		130/128	0.812
99	gi|118595754	RecName: Full=Myoglobin	4891	22223	237	173	18	13	71.4	7.96	486	Quantitation summary for protein	129/126	0.996	205	[1.086]		130/126	1.062	200	[1.078]		131/126	1.178	206	[1.051]		129/127	0.894	201	[1.346]		130/127	0.99	195	[1.397]		131/127	1.089	202	[1.433]		129/128	0.405	206	[1.199]		130/128	0.452
100	gi|134260594	myosin light chain 2 [Gallus gallus]	4886	22959	272	225	21	19	93.3	4.83	1777.92	Quantitation summary for protein	129/126	0.501	62	[1.102]		130/126	0.585	62	1.056	*	131/126	0.818	62	[1.060]		129/127	1.51	62	1.126	*	130/127	1.726	62	1.154	*	131/127	2.568	62	1.163	*	129/128	1.347	62	[1.120]		130/128	1.554
101	gi|118534	RecName: Full=Glutamate dehydrogenase 1, mitochondrial; Short=GDH 1	4836	64325	195	176	30	25	51.1	8.48	12.32	Quantitation summary for protein	129/126	1.178	76	1.186	*	130/126	1.005	76	[1.155]		131/126	0.858	77	1.109	*	129/127	0.959	74	[1.366]		130/127	0.801	74	[1.594]		131/127	0.718	75	[1.647]		129/128	0.775	76	[1.196]		130/128	0.653
102	gi|27465053	alpha-tropomyosin 2 [Gallus gallus]	4810	40868	257	193	31	24	61.3	4.65	56.27	Quantitation summary for protein	129/126	---	0	---		130/126	---	0	---		131/126	---	0	---		129/127	---	0	---		130/127	---	0	---		131/127	---	0	---		129/128	---	0	---		130/128	---
103	gi|196049776	Chain B, Chicken Cytochrome Bc1 Complex Inhibited By An Iodinated Analogue Of The Polyketide Crocacin-d	4770	53019	184	156	31	25	59.2	8.19	29.98	Quantitation summary for protein	129/126	0.993	167	[1.069]		130/126	1.084	157	[1.055]		131/126	0.903	167	[1.045]		129/127	1.154	168	[1.220]		130/127	1.263	157	[1.234]		131/127	1.09	168	[1.240]		129/128	0.874	168	[1.123]		130/128	0.95
104	gi|363743079	PREDICTED: ATP synthase subunit b, mitochondrial [Gallus gallus]	4742	34198	241	193	20	18	53.3	9.23	111.52	Quantitation summary for protein	129/126	1.164	211	[1.071]		130/126	1.061	207	[1.054]		131/126	1.052	211	[1.044]		129/127	1.409	210	[1.287]		130/127	1.279	206	[1.308]		131/127	1.322	210	[1.330]		129/128	1.145	211	[1.160]		130/128	1.033
105	gi|53130416	hypothetical protein RCJMB04_7j20 [Gallus gallus]	4670	50830	172	149	23	19	65.1	8.65	22.12	Quantitation summary for protein	129/126	0.759	157	[1.058]		130/126	0.824	148	[1.052]		131/126	0.671	156	[1.052]		129/127	0.97	159	1.115	*	130/127	1.035	147	1.111	*	131/127	0.894	157	1.127	*	129/128	0.917	158	[1.093]		130/128	0.987
106	gi|223280	tubulin alpha	4630	50613	177	149	23	21	54.5	5	16.1	Quantitation summary for protein	129/126	---	0	---		130/126	---	0	---		131/126	---	0	---		129/127	---	0	---		130/127	---	0	---		131/127	---	0	---		129/128	---	0	---		130/128	---
107	gi|313661454	chaperone activity of bc1 complex-like, mitochondrial [Gallus gallus]	4629	84358	175	156	23	19	40.4	6.36	1.91	Quantitation summary for protein	129/126	0.782	165	[1.045]		130/126	0.794	165	[1.036]		131/126	0.718	165	[1.041]		129/127	1.037	164	[1.091]		130/127	1.027	164	[1.097]		131/127	0.99	164	[1.096]		129/128	0.949	165	1.06	*	130/128	0.951
108	gi|1703321	RecName: Full=Annexin A6; AltName: Full=67 kDa calelectrin; AltName: Full=Annexin VI; AltName: Full=Annexin-6; AltName: Full=Calphobindin-II; Short=CPB-II; AltName: Full=Chromobindin-20; AltName: Full=Lipocortin VI; AltName: Full=P68; AltName: Full=	4614	88231	226	184	48	41	56.2	5.42	16.82	Quantitation summary for protein	129/126	1.14	5	1.082	*	130/126	0.895	5	1.12		131/126	1.001	5	1.122		129/127	1.385	5	1.049	*	130/127	1.062	5	1.007	*	131/127	1.264	5	1.044	*	129/128	1.11	5	1.037	*	130/128	0.86
109	gi|60098555	hypothetical protein RCJMB04_3l20 [Gallus gallus]	4583	50541	218	190	27	23	46.6	8.19	22.6	Quantitation summary for protein	129/126	1.159	204	[1.044]		130/126	0.952	193	1.034	*	131/126	1.007	204	[1.031]		129/127	1.865	197	[1.165]		130/127	1.51	190	[1.178]		131/127	1.687	197	[1.189]		129/128	1.449	202	[1.092]		130/128	1.177
110	gi|118092411	PREDICTED: glutamate dehydrogenase 1, mitochondrial [Gallus gallus]	4562	55068	184	163	24	21	51.8	8.34	14.33	Quantitation summary for protein	129/126	1.155	65	[1.107]		130/126	0.849	64	1.062	*	131/126	0.908	65	1.059	*	129/127	0.706	63	[1.228]		130/127	0.504	62	[1.351]		131/127	0.565	63	[1.365]		129/128	0.748	65	[1.116]		130/128	0.543
111	gi|363734923	PREDICTED: cytoplasmic dynein 1 heavy chain 1 [Gallus gallus]	4557	595678	233	194	98	86	21.8	6.08	0.74	Quantitation summary for protein	129/126	1.773	202	[1.032]		130/126	1.559	199	[1.029]		131/126	1.314	202	[1.020]		129/127	1.902	201	[1.069]		130/127	1.636	199	1.075	*	131/127	1.466	201	1.074	*	129/128	2.437	201	1.056	*	130/128	2.116
112	gi|50731694	PREDICTED: 2,4-dienoyl-CoA reductase, mitochondrial [Gallus gallus]	4526	41795	202	172	21	20	56.8	9.46	40.48	Quantitation summary for protein	129/126	1.356	185	1.05	*	130/126	1.248	182	[1.075]		131/126	1.001	185	1.044		129/127	1.015	185	[1.170]		130/127	0.913	182	[1.188]		131/127	0.779	185	[1.163]		129/128	1.133	185	[1.088]		130/128	1.029
113	gi|135469	RecName: Full=Tubulin beta-5 chain; AltName: Full=Beta-tubulin class-V	4462	54062	204	175	19	17	37.9	4.79	29.87	Quantitation summary for protein	129/126	1.488	39	[1.099]		130/126	1.227	39	1.051	*	131/126	1.139	39	1.033	*	129/127	0.973	39	1.214		130/127	0.785	39	1.26	*	131/127	0.775	39	[1.276]		129/128	1.629	39	1.139	*	130/128	1.326
114	gi|53134324	hypothetical protein RCJMB04_23a9 [Gallus gallus]	4447	42040	158	138	23	21	59.2	8.87	21.22	Quantitation summary for protein	129/126	0.908	144	[1.049]		130/126	0.932	134	1.048	*	131/126	0.926	144	1.04	*	129/127	0.721	141	[1.206]		130/127	0.762	131	[1.211]		131/127	0.767	141	[1.209]		129/128	0.833	144	[1.088]		130/128	0.856
115	gi|53126358	hypothetical protein RCJMB04_1c14 [Gallus gallus]	4441	72717	202	171	27	24	48.5	7.4	11.95	Quantitation summary for protein	129/126	1.269	185	[1.064]		130/126	1.111	183	[1.061]		131/126	1.1	185	1.042	*	129/127	1.774	185	[1.198]		130/127	1.519	183	[1.223]		131/127	1.599	185	[1.232]		129/128	1.331	185	[1.093]		130/128	1.149
116	gi|882147	CRMP-62 [Gallus gallus]	4392	70253	135	122	21	18	47	5.96	5.81	Quantitation summary for protein	129/126	1.027	113	[1.058]		130/126	0.973	106	1.059	*	131/126	0.967	113	[1.046]		129/127	0.8	113	[1.132]		130/127	0.742	106	[1.189]		131/127	0.783	113	[1.184]		129/128	0.889	113	1.101	*	130/128	0.831
117	gi|310750374	pyruvate dehydrogenase E1 component subunit beta, mitochondrial [Gallus gallus]	4388	43433	167	147	17	16	55.4	5.95	15.24	Quantitation summary for protein	129/126	1.088	155	1.038	*	130/126	0.976	145	[1.062]		131/126	1.011	155	[1.037]		129/127	0.769	154	[1.242]		130/127	0.788	145	[1.240]		131/127	0.744	154	[1.240]		129/128	0.973	155	[1.116]		130/128	0.873
118	gi|560038	PGK [Gallus gallus]	4368	55400	200	154	34	28	62.4	8.31	22.94	Quantitation summary for protein	129/126	1.224	177	[1.075]		130/126	1.047	174	[1.047]		131/126	1.166	178	[1.042]		129/127	1.005	177	[1.155]		130/127	0.85	174	[1.179]		131/127	0.996	178	[1.200]		129/128	1.05	176	[1.091]		130/128	0.893
119	gi|363735594	PREDICTED: thioredoxin-dependent peroxide reductase, mitochondrial [Gallus gallus]	4328	29238	183	161	14	13	52.6	8.58	21.9	Quantitation summary for protein	129/126	0.904	169	[1.085]		130/126	0.771	160	1.056	*	131/126	0.69	169	[1.069]		129/127	1.331	166	[1.163]		130/127	1.13	157	[1.182]		131/127	1.058	166	[1.195]		129/128	1.101	169	[1.092]		130/128	0.931
120	gi|22651801	glucose regulated thiol oxidoreductase protein precursor [Gallus gallus]	4308	68462	203	161	43	38	61.6	5.76	20	Quantitation summary for protein	129/126	0.949	174	1.049	*	130/126	0.86	171	[1.044]		131/126	1.055	174	1.036	*	129/127	0.865	173	[1.174]		130/127	0.766	170	[1.203]		131/127	0.998	173	[1.213]		129/128	1.064	174	[1.085]		130/128	0.952
121	gi|23821300	hexokinase1 [Gallus gallus]	4299	118742	178	152	45	40	46.7	6.32	4.39	Quantitation summary for protein	129/126	1.338	17	1.231	*	130/126	1.113	17	1.141	*	131/126	1.122	16	1.111	*	129/127	0.93	17	1.372		130/127	0.756	17	[1.543]		131/127	0.776	17	[1.662]		129/128	1.074	17	1.241		130/128	0.881
122	gi|53126523	hypothetical protein RCJMB04_1e8 [Gallus gallus]	4275	33681	196	161	25	21	80.4	4.63	68.02	Quantitation summary for protein	129/126	0.79	160	[1.119]		130/126	0.872	155	[1.190]		131/126	1.013	160	[1.098]		129/127	1.772	160	[1.232]		130/127	1.92	154	[1.315]		131/127	2.367	160	[1.293]		129/128	1.214	161	[1.196]		130/128	1.325
123	gi|63524	unnamed protein product [Gallus gallus]	4227	58129	155	123	23	20	41.5	6.84	5.49	Quantitation summary for protein	129/126	0.638	96	[1.157]		130/126	0.968	92	1.097	*	131/126	0.677	97	1.11	*	129/127	0.319	96	[1.301]		130/127	0.471	92	[1.398]		131/127	0.352	97	[1.400]		129/128	0.327	96	1.226	*	130/128	0.489
124	gi|118097631	PREDICTED: heat shock 70 kDa protein 4 isoform 2 [Gallus gallus]	4193	114515	190	151	54	43	62.4	5.26	6.18	Quantitation summary for protein	129/126	1.244	154	[1.037]		130/126	1.165	149	[1.034]		131/126	1.459	157	[1.030]		129/127	1.324	153	[1.085]		130/127	1.208	148	[1.095]		131/127	1.614	153	[1.102]		129/128	1.556	153	[1.055]		130/128	1.435
125	gi|449407	myosin subfragment 2	4180	77212	192	148	51	39	76.9	5	19.82	Quantitation summary for protein	129/126	1.763	11	1.079	*	130/126	1.034	10	1.101		131/126	1.012	11	1.043		129/127	1.846	11	1.356	*	130/127	1.116	10	1.306		131/127	1.102	11	1.289		129/128	1.642	11	1.304	*	130/128	0.984
126	gi|53129115	hypothetical protein RCJMB04_5g20 [Gallus gallus]	4145	32947	187	161	17	15	63	7.03	33.82	Quantitation summary for protein	129/126	1.012	166	1.056	*	130/126	1.155	164	[1.083]		131/126	1.166	166	[1.049]		129/127	1.001	166	[1.219]		130/127	1.121	164	[1.239]		131/127	1.2	166	[1.250]		129/128	1.073	166	[1.121]		130/128	1.212
127	gi|42794903	cardiac troponin I [Gallus gallus]	4133	27623	183	165	16	12	57.2	9.95	59.26	Quantitation summary for protein	129/126	0.749	169	[1.066]		130/126	0.896	160	1.057	*	131/126	0.981	169	[1.039]		129/127	0.503	169	[1.085]		130/127	0.587	160	1.102	*	131/127	0.685	169	[1.107]		129/128	0.768	169	[1.091]		130/128	0.896
128	gi|53132931	hypothetical protein RCJMB04_14d17 [Gallus gallus]	4076	42965	287	227	19	18	40.1	8.37	25.06	Quantitation summary for protein	129/126	1.358	235	[1.089]		130/126	1.21	227	[1.089]		131/126	1.046	235	[1.050]		129/127	1.405	235	[1.203]		130/127	1.225	227	[1.241]		131/127	1.126	235	[1.246]		129/128	1.445	233	[1.119]		130/128	1.272
129	gi|63070	unnamed protein product [Gallus gallus]	4059	50739	159	133	23	21	55.3	4.96	13.98	Quantitation summary for protein	129/126	---	0	---		130/126	---	0	---		131/126	---	0	---		129/127	---	0	---		130/127	---	0	---		131/127	---	0	---		129/128	---	0	---		130/128	---
130	gi|53129586	hypothetical protein RCJMB04_5n23 [Gallus gallus]	3937	34759	216	162	34	29	78.2	4.69	136.43	Quantitation summary for protein	129/126	0.63	50	[1.147]		130/126	0.74	50	[1.074]		131/126	1.002	50	[1.074]		129/127	1.274	50	1.166	*	130/127	1.464	50	[1.260]		131/127	2.11	50	[1.291]		129/128	1.077	50	[1.112]		130/128	1.248
131	gi|363743392	PREDICTED: alpha-2-macroglobulin-like protein 1-like [Gallus gallus]	3934	180603	200	169	47	42	31.5	5.92	2.38	Quantitation summary for protein	129/126	1.106	180	[1.049]		130/126	1.359	178	[1.058]		131/126	1.065	180	[1.043]		129/127	0.874	180	[1.169]		130/127	1.05	178	[1.201]		131/127	0.875	180	[1.199]		129/128	1.022	180	[1.079]		130/128	1.238
132	gi|63739	prolyl-4-hydroxylase (AA 5 - 494) [Gallus gallus]	3901	65486	178	144	33	30	54.3	4.66	11.75	Quantitation summary for protein	129/126	0.96	160	1.043	*	130/126	0.976	156	[1.033]		131/126	1.226	160	[1.033]		129/127	1.118	159	[1.149]		130/127	1.114	155	[1.167]		131/127	1.485	159	[1.169]		129/128	1.258	160	[1.079]		130/128	1.262
133	gi|260103640	cyclophilin A [Gallus gallus]	3890	21063	198	149	16	14	78.8	8.29	273.24	Quantitation summary for protein	129/126	1.362	157	[1.147]		130/126	0.937	151	[1.157]		131/126	1.07	157	1.104	*	129/127	0.485	156	[1.473]		130/127	0.332	150	[1.534]		131/127	0.394	157	[1.591]		129/128	0.956	157	[1.297]		130/128	0.651
134	gi|53127764	hypothetical protein RCJMB04_3f8 [Gallus gallus]	3874	63047	184	160	28	24	44.1	8.19	17.12	Quantitation summary for protein	129/126	0.985	173	[1.109]		130/126	0.836	167	[1.079]		131/126	0.846	172	[1.065]		129/127	0.313	171	[1.274]		130/127	0.26	166	[1.389]		131/127	0.28	171	[1.385]		129/128	0.511	173	[1.167]		130/128	0.432
135	gi|60098567	hypothetical protein RCJMB04_3m22 [Gallus gallus]	3850	92715	186	158	42	41	53.2	8.29	6.76	Quantitation summary for protein	129/126	1.329	166	[1.034]		130/126	1.289	165	[1.030]		131/126	1.238	166	[1.024]		129/127	2.408	166	[1.112]		130/127	2.283	165	[1.120]		131/127	2.333	166	[1.119]		129/128	1.814	166	[1.074]		130/128	1.734
136	gi|4100172	progesterone receptor binding protein [Gallus gallus]	3781	10625	166	146	11	7	87.3	7.93	117.68	Quantitation summary for protein	129/126	0.794	146	[1.058]		130/126	0.864	144	[1.041]		131/126	0.739	147	[1.058]		129/127	0.657	145	[1.208]		130/127	0.7	144	[1.217]		131/127	0.639	146	[1.208]		129/128	0.669	146	[1.129]		130/128	0.702
137	gi|118090053	PREDICTED: hydroxyacyl-coenzyme A dehydrogenase, mitochondrial [Gallus gallus]	3752	41561	306	208	27	22	62.5	8.68	106.1	Quantitation summary for protein	129/126	0.979	250	[1.105]		130/126	0.896	240	[1.078]		131/126	0.768	250	[1.086]		129/127	0.426	247	[1.467]		130/127	0.387	238	[1.482]		131/127	0.347	247	[1.469]		129/128	0.679	250	[1.193]		130/128	0.615
138	gi|118094580	PREDICTED: carnitine O-palmitoyltransferase 2, mitochondrial [Gallus gallus]	3706	85031	170	132	36	27	53.1	8.53	5.38	Quantitation summary for protein	129/126	1.098	148	[1.056]		130/126	1.032	146	1.047	*	131/126	1.04	149	[1.041]		129/127	1.433	142	[1.147]		130/127	1.318	140	[1.154]		131/127	1.413	142	[1.156]		129/128	1.051	143	[1.075]		130/128	0.973
139	gi|363739726	PREDICTED: enoyl-CoA delta isomerase 1, mitochondrial [Gallus gallus]	3668	38653	153	124	16	16	49	9.3	21.74	Quantitation summary for protein	129/126	1.039	135	1.046	*	130/126	1.152	129	[1.094]		131/126	1.032	136	1.037	*	129/127	0.992	136	[1.154]		130/127	1.068	129	[1.185]		131/127	1.017	136	[1.180]		129/128	1.062	136	[1.099]		130/128	1.152
140	gi|60099255	hypothetical protein RCJMB04_39i8 [Gallus gallus]	3650	54635	132	114	17	12	31	9.25	3.32	Quantitation summary for protein	129/126	0.98	115	[1.089]		130/126	1.01	102	1.084		131/126	0.963	115	[1.051]		129/127	0.682	115	[1.214]		130/127	0.804	101	1.292	*	131/127	0.69	115	[1.289]		129/128	0.831	116	[1.105]		130/128	0.928
141	gi|459642348	ankyrin 3, node of Ranvier (ankyrin G) [Gallus gallus]	3639	563603	151	132	42	41	12.1	6.06	0.35	Quantitation summary for protein	129/126	0.97	124	1.02	*	130/126	0.871	124	1.028	*	131/126	1.052	124	1.017	*	129/127	1.138	124	1.072	*	130/127	0.998	124	[1.078]		131/127	1.283	124	[1.082]		129/128	1.537	124	[1.049]		130/128	1.361
142	gi|755815	complement C3 precursor [Gallus gallus]	3617	210718	193	166	58	55	31.1	6.69	2.52	Quantitation summary for protein	129/126	0.92	154	[1.032]		130/126	1.15	153	[1.030]		131/126	0.674	154	[1.033]		129/127	0.804	154	[1.135]		130/127	0.983	153	[1.161]		131/127	0.612	154	[1.143]		129/128	0.771	154	[1.052]		130/128	0.95
143	gi|50752600	PREDICTED: tubulin alpha-3 chain [Gallus gallus]	3605	55295	131	111	17	15	39.6	4.94	6.15	Quantitation summary for protein	129/126	0.746	2	1.012	*	130/126	0.78	2	1.08		131/126	1.136	2	1.055		129/127	0.441	2	1.041	*	130/127	0.45	2	1.137		131/127	0.698	2	1.002	*	129/128	0.924	2	1.232		130/128	0.953
144	gi|50729879	PREDICTED: ATP synthase-coupling factor 6, mitochondrial isoform 2 [Gallus gallus]	3565	14873	206	156	12	12	54.2	8.96	4637.07	Quantitation summary for protein	129/126	0.599	170	[1.132]		130/126	0.725	153	[1.063]		131/126	0.788	167	[1.094]		129/127	0.569	165	[1.344]		130/127	0.911	146	[1.442]		131/127	0.826	161	[1.516]		129/128	0.614	173	[1.233]		130/128	0.881
145	gi|363736265	PREDICTED: tubulin alpha-5 chain-like [Gallus gallus]	3555	56335	138	117	20	18	42.8	4.95	9.83	Quantitation summary for protein	129/126	0.942	4	1.044		130/126	0.786	5	1.221		131/126	0.963	5	1.056		129/127	0.838	5	1.343		130/127	0.709	4	1.092	*	131/127	0.883	5	1.316		129/128	1.565	5	1.343	*	130/128	1.275
146	gi|138533	RecName: Full=Vimentin	3527	58667	168	148	36	33	59.8	5.09	15.12	Quantitation summary for protein	129/126	0.518	20	[1.072]		130/126	0.499	20	1.122	*	131/126	0.521	20	1.091	*	129/127	1.587	20	1.098	*	130/127	1.494	20	1.133	*	131/127	1.659	20	[1.128]		129/128	1.387	20	[1.127]		130/128	1.318
147	gi|13434994	PIT 54 [Gallus gallus]	3470	57254	127	119	19	19	46.4	4.61	6.07	Quantitation summary for protein	129/126	0.606	123	[1.069]		130/126	0.955	123	[1.067]		131/126	0.732	125	[1.047]		129/127	0.439	123	[1.168]		130/127	0.676	123	[1.232]		131/127	0.548	125	[1.230]		129/128	0.794	123	[1.084]		130/128	1.234
148	gi|88909244	RecName: Full=Prohibitin	3376	32914	149	136	21	19	72.1	5.57	45.43	Quantitation summary for protein	129/126	0.896	139	[1.045]		130/126	1.049	132	[1.049]		131/126	0.968	138	[1.034]		129/127	0.722	140	[1.148]		130/127	0.827	132	[1.160]		131/127	0.812	139	[1.158]		129/128	0.718	140	[1.074]		130/128	0.829
149	gi|363745992	PREDICTED: ATP synthase subunit delta, mitochondrial-like, partial [Gallus gallus]	3372	14648	186	132	8	7	60.2	4.49	41.91	Quantitation summary for protein	129/126	0.886	132	[1.222]		130/126	0.787	122	1.107	*	131/126	0.711	133	1.105	*	129/127	0.61	132	[1.615]		130/127	0.626	122	[1.650]		131/127	0.504	134	[1.711]		129/128	0.471	132	[1.348]		130/128	0.436
150	gi|1616990	enolase [Gallus gallus]	3302	56045	87	80	11	9	29.5	7.28	1.49	Quantitation summary for protein	129/126	1.376	81	[1.077]		130/126	0.883	81	1.043	*	131/126	0.725	81	[1.078]		129/127	1.452	81	[1.193]		130/127	0.911	81	[1.120]		131/127	0.795	81	[1.091]		129/128	1.526	81	[1.165]		130/128	0.966
151	gi|53127099	hypothetical protein RCJMB04_1i23 [Gallus gallus]	3281	37899	166	140	28	24	79.7	9.89	65.22	Quantitation summary for protein	129/126	0.755	153	[1.082]		130/126	0.917	149	[1.088]		131/126	0.759	153	1.057	*	129/127	0.85	153	[1.227]		130/127	1.01	149	[1.268]		131/127	0.889	153	[1.247]		129/128	0.616	153	[1.119]		130/128	0.739
152	gi|60098993	hypothetical protein RCJMB04_18g2 [Gallus gallus]	3259	100932	157	132	39	34	46.3	6.4	4.43	Quantitation summary for protein	129/126	1.413	4	1.083	*	130/126	1.096	3	1.045		131/126	1.162	4	1.072	*	129/127	1.031	4	1.143		130/127	0.778	3	1.148		131/127	0.882	4	1.224		129/128	1.337	4	[1.093]		130/128	1.024
153	gi|363737017	PREDICTED: propionyl-CoA carboxylase beta chain, mitochondrial [Gallus gallus]	3243	63364	115	100	29	26	57.3	6.8	5.83	Quantitation summary for protein	129/126	1.017	106	1.045	*	130/126	1.001	102	[1.035]		131/126	1.008	106	1.026	*	129/127	1.336	106	[1.108]		130/127	1.289	102	[1.129]		131/127	1.377	106	[1.138]		129/128	1.391	104	1.053	*	130/128	1.35
154	gi|16610202	6-phosphofructokinase [Gallus gallus]	3242	94180	127	109	29	26	42.3	8.35	3.82	Quantitation summary for protein	129/126	1.34	103	[1.049]		130/126	1.061	99	[1.064]		131/126	1.118	103	1.035	*	129/127	2.034	101	[1.165]		130/127	1.582	99	[1.154]		131/127	1.766	101	[1.167]		129/128	2.413	100	1.106	*	130/128	1.888
155	gi|53136784	hypothetical protein RCJMB04_33n14 [Gallus gallus]	3240	56939	116	92	26	21	62.5	8.63	6.15	Quantitation summary for protein	129/126	1.097	103	[1.063]		130/126	1.039	98	1.057	*	131/126	0.934	103	[1.051]		129/127	2.277	102	1.207	*	130/127	2.134	99	[1.191]		131/127	2.016	102	1.206	*	129/128	1.217	102	1.089	*	130/128	1.14
156	gi|53127891	hypothetical protein RCJMB04_4e21 [Gallus gallus]	3231	42952	179	138	12	11	29.3	9.33	6.96	Quantitation summary for protein	129/126	1.486	169	[1.045]		130/126	1.373	169	[1.052]		131/126	1.284	169	[1.033]		129/127	2.631	169	[1.120]		130/127	2.377	169	1.121	*	131/127	2.364	169	[1.138]		129/128	1.887	169	[1.084]		130/128	1.72
157	gi|53130750	hypothetical protein RCJMB04_9n20 [Gallus gallus]	3227	49120	114	96	13	10	30.6	8.53	3.75	Quantitation summary for protein	129/126	1.131	102	1.037	*	130/126	1.15	100	1.043	*	131/126	1.122	102	[1.038]		129/127	1.264	101	1.091	*	130/127	1.257	100	1.096	*	131/127	1.303	101	1.11	*	129/128	1.154	102	1.07	*	130/128	1.157
158	gi|515694	tropomyosin [Gallus gallus]	3227	33572	216	143	35	25	70.6	4.65	196.65	Quantitation summary for protein	129/126	---	0	---		130/126	---	0	---		131/126	---	0	---		129/127	---	0	---		130/127	---	0	---		131/127	---	0	---		129/128	---	0	---		130/128	---
159	gi|53127352	hypothetical protein RCJMB04_1p8 [Gallus gallus]	3214	98977	103	95	31	29	39.8	5.32	2.56	Quantitation summary for protein	129/126	1.294	99	[1.056]		130/126	1.143	96	[1.048]		131/126	1.245	99	[1.051]		129/127	0.86	98	[1.115]		130/127	0.743	96	[1.126]		131/127	0.861	98	[1.139]		129/128	1.261	99	[1.072]		130/128	1.093
160	gi|119359	RecName: Full=Endoplasmin; AltName: Full=Heat shock 108 kDa protein; Short=HSP 108; Short=HSP108; AltName: Full=Heat shock protein 90 kDa beta member 1; AltName: Full=Transferrin-binding protein; Flags: Precursor	3209	110517	172	128	43	35	50.2	4.83	4.75	Quantitation summary for protein	129/126	1.047	137	[1.063]		130/126	1.041	135	[1.058]		131/126	1.065	137	[1.056]		129/127	1.12	137	[1.165]		130/127	1.09	135	[1.186]		131/127	1.185	137	[1.198]		129/128	1.195	137	1.088	*	130/128	1.173
161	gi|212811	beta-tropomyosin [Gallus gallus]	3165	34154	215	143	35	25	70.6	4.65	177.79	Quantitation summary for protein	129/126	---	0	---		130/126	---	0	---		131/126	---	0	---		129/127	---	0	---		130/127	---	0	---		131/127	---	0	---		129/128	---	0	---		130/128	---
162	gi|12964602	branched-chain alpha-keto acid dihydrolipoyl acyltransferase [Gallus gallus]	3147	63072	149	131	23	18	46.9	8.75	5.9	Quantitation summary for protein	129/126	1.072	139	[1.046]		130/126	0.961	132	[1.037]		131/126	0.919	139	[1.038]		129/127	0.974	140	[1.108]		130/127	0.855	132	[1.133]		131/127	0.868	140	[1.142]		129/128	1.119	140	[1.070]		130/128	0.992
163	gi|363739855	PREDICTED: aldehyde dehydrogenase, mitochondrial isoform 2 [Gallus gallus]	3120	65575	141	116	32	27	53.4	7.92	9.97	Quantitation summary for protein	129/126	0.986	114	[1.064]		130/126	1.009	111	1.052		131/126	1.016	114	[1.049]		129/127	1.19	114	[1.179]		130/127	1.191	111	1.212	*	131/127	1.275	114	1.227	*	129/128	1.012	114	[1.107]		130/128	1.021
164	gi|63066	unnamed protein product [Gallus gallus]	3065	51176	162	136	32	31	62.6	8.22	36.34	Quantitation summary for protein	129/126	1.071	145	[1.062]		130/126	1.144	144	[1.069]		131/126	1.057	145	[1.046]		129/127	0.916	145	[1.174]		130/127	0.957	144	[1.187]		131/127	0.941	145	[1.189]		129/128	0.941	145	[1.091]		130/128	0.991
165	gi|118102310	PREDICTED: tubulin alpha-1C chain [Gallus gallus]	3053	55293	100	88	17	13	38.4	5.01	3.77	Quantitation summary for protein	129/126	1.032	3	1.06		130/126	1.323	4	1.237		131/126	1.336	3	1.078	*	129/127	0.921	4	[1.294]		130/127	1.182	4	1.348		131/127	1.24	4	1.342		129/128	1.283	4	1.309		130/128	1.66
166	gi|1184958	elongation factor 2 [Gallus gallus]	2984	111239	160	124	45	37	51.9	6.4	5.21	Quantitation summary for protein	129/126	1.195	111	1.05	*	130/126	1.052	107	[1.055]		131/126	1.253	111	1.038	*	129/127	0.804	111	[1.170]		130/127	0.693	107	[1.227]		131/127	0.878	111	[1.199]		129/128	1.19	111	[1.094]		130/128	1.033
167	gi|363729859	PREDICTED: uncharacterized protein LOC396097 [Gallus gallus]	2976	136863	102	89	18	16	20.5	5.74	0.57	Quantitation summary for protein	129/126	0.857	89	[1.071]		130/126	0.773	88	1.068	*	131/126	0.874	90	1.047	*	129/127	0.809	89	[1.124]		130/127	0.715	88	[1.157]		131/127	0.859	90	[1.173]		129/128	1.198	89	[1.088]		130/128	1.068
168	gi|53127640	hypothetical protein RCJMB04_2m19 [Gallus gallus]	2947	32451	111	91	19	15	68.3	8.54	14.35	Quantitation summary for protein	129/126	0.917	95	[1.110]		130/126	0.958	93	1.09	*	131/126	0.812	95	1.074	*	129/127	0.876	94	[1.358]		130/127	0.895	93	[1.466]		131/127	0.807	94	[1.428]		129/128	0.862	95	[1.207]		130/128	0.889
169	gi|148224812	NADH dehydrogenase [ubiquinone] 1 alpha subcomplex subunit 5 [Gallus gallus]	2936	15273	117	102	13	13	86.2	6.59	181.56	Quantitation summary for protein	129/126	0.749	106	[1.070]		130/126	1.023	103	[1.060]		131/126	0.669	106	[1.047]		129/127	0.78	105	[1.119]		130/127	1.042	102	[1.150]		131/127	0.725	105	[1.152]		129/128	0.611	106	[1.062]		130/128	0.822
170	gi|53132504	hypothetical protein RCJMB04_13i11 [Gallus gallus]	2936	104985	117	100	30	25	40.4	6.37	2.41	Quantitation summary for protein	129/126	1.229	104	[1.041]		130/126	1.167	100	[1.038]		131/126	1.12	104	1.03	*	129/127	1.51	104	[1.141]		130/127	1.421	100	[1.153]		131/127	1.433	104	[1.155]		129/128	1.076	104	[1.082]		130/128	1.014
171	gi|33331366	phosphoglucomutase 1 [Gallus gallus]	2930	77376	122	108	31	29	54.2	8.98	5.75	Quantitation summary for protein	129/126	1.084	109	[1.046]		130/126	1.023	108	1.026	*	131/126	1.057	109	[1.026]		129/127	1.47	106	[1.138]		130/127	1.35	105	[1.146]		131/127	1.481	106	[1.158]		129/128	1.29	109	[1.073]		130/128	1.2
172	gi|53127458	hypothetical protein RCJMB04_2i3 [Gallus gallus]	2879	32633	104	93	22	20	67.8	4.68	35.06	Quantitation summary for protein	129/126	1.368	66	1.084	*	130/126	1.033	63	[1.050]		131/126	1.142	66	1.051	*	129/127	0.914	65	[1.281]		130/127	0.785	62	[1.277]		131/127	0.789	65	[1.318]		129/128	1.293	66	[1.151]		130/128	0.989
173	gi|114378	RecName: Full=Sodium/potassium-transporting ATPase subunit alpha-2; Short=Na(+)/K(+) ATPase alpha-2 subunit; AltName: Full=Sodium pump subunit alpha-2	2877	125207	80	70	18	15	19.5	5.43	1.11	Quantitation summary for protein	129/126	1.604	3	1.068	*	130/126	1.251	3	1.055	*	131/126	1.249	3	1.106		129/127	1.151	3	1.095		130/127	0.877	3	1.066		131/127	0.932	3	1.135		129/128	1.474	3	1.067	*	130/128	1.134
174	gi|53129679	hypothetical protein RCJMB04_5p10 [Gallus gallus]	2855	40243	81	73	17	16	52.9	8.6	9.66	Quantitation summary for protein	129/126	1.081	76	1.062	*	130/126	0.996	76	1.059		131/126	1.009	76	1.051		129/127	0.774	76	[1.234]		130/127	0.697	76	[1.278]		131/127	0.752	76	1.24	*	129/128	0.824	76	[1.104]		130/128	0.749
175	gi|212807	alpha-tropomyosin (smooth muscle) [Gallus gallus]	2839	40911	223	131	37	25	67.3	4.68	55.66	Quantitation summary for protein	129/126	---	0	---		130/126	---	0	---		131/126	---	0	---		129/127	---	0	---		130/127	---	0	---		131/127	---	0	---		129/128	---	0	---		130/128	---
176	gi|310772238	glutathione S-transferase kappa 1 [Gallus gallus]	2829	28832	128	106	14	10	49.1	8.89	20.27	Quantitation summary for protein	129/126	1.228	119	[1.061]		130/126	1.254	119	[1.069]		131/126	0.87	119	[1.049]		129/127	1.253	119	[1.158]		130/127	1.251	119	1.141	*	131/127	0.924	119	[1.170]		129/128	1.02	119	[1.090]		130/128	1.028
177	gi|363737486	PREDICTED: cytochrome c oxidase subunit 5A, mitochondrial isoform 2 [Gallus gallus]	2826	17841	126	113	10	10	39.9	6.3	74.67	Quantitation summary for protein	129/126	1.062	116	[1.067]		130/126	1.06	105	1.072	*	131/126	0.867	116	1.058	*	129/127	0.688	116	[1.148]		130/127	0.672	105	[1.185]		131/127	0.584	116	[1.172]		129/128	0.676	116	[1.075]		130/128	0.66
178	gi|114380	RecName: Full=Sodium/potassium-transporting ATPase subunit alpha-3; Short=Na(+)/K(+) ATPase alpha-3 subunit; AltName: Full=Na(+)/K(+) ATPase alpha(III) subunit; AltName: Full=Sodium pump subunit alpha-3	2823	125758	74	67	16	14	18	5.23	1	Quantitation summary for protein	129/126	---	0	---		130/126	---	0	---		131/126	---	0	---		129/127	---	0	---		130/127	---	0	---		131/127	---	0	---		129/128	---	0	---		130/128	---
179	gi|44969651	calreticulin [Gallus gallus]	2816	56017	129	100	24	20	54	4.41	6.8	Quantitation summary for protein	129/126	0.642	115	[1.150]		130/126	0.941	115	[1.122]		131/126	0.826	115	[1.082]		129/127	0.834	103	[1.277]		130/127	1.165	103	[1.440]		131/127	1.108	103	[1.484]		129/128	0.766	110	1.187	*	130/128	1.096
180	gi|488468	elongation factor 1 alpha [Gallus gallus]	2799	61467	124	103	19	15	35.5	9.1	3.3	Quantitation summary for protein	129/126	1.049	64	1.063	*	130/126	0.949	59	1.048	*	131/126	1.226	64	[1.045]		129/127	0.927	64	[1.122]		130/127	0.834	60	1.141	*	131/127	1.128	64	1.141	*	129/128	1.075	64	[1.082]		130/128	0.973
181	gi|363744151	PREDICTED: NADH dehydrogenase [ubiquinone] iron-sulfur protein 4, mitochondrial [Gallus gallus]	2793	22608	121	102	12	12	50.3	9.88	53.69	Quantitation summary for protein	129/126	0.723	113	1.083	*	130/126	0.974	111	[1.055]		131/126	0.809	113	[1.053]		129/127	0.714	112	1.133	*	130/127	0.94	111	[1.180]		131/127	0.832	112	1.198	*	129/128	0.832	113	[1.104]		130/128	1.105
182	gi|408500	beta-H globin [Gallus gallus]	2775	19219	146	112	15	14	66	9.2	65.78	Quantitation summary for protein	129/126	0.908	19	[1.071]		130/126	0.888	19	[1.063]		131/126	1.082	19	1.066	*	129/127	1.818	18	1.259	*	130/127	1.745	18	[1.280]		131/127	2.203	18	[1.301]		129/128	1.089	19	1.075	*	130/128	1.051
183	gi|363731790	PREDICTED: leucine-rich PPR motif-containing protein, mitochondrial [Gallus gallus]	2772	180560	165	135	50	45	33.4	6.68	2.09	Quantitation summary for protein	129/126	1.917	145	[1.044]		130/126	1.515	144	[1.033]		131/126	1.447	145	[1.032]		129/127	2.27	145	[1.091]		130/127	1.755	144	[1.100]		131/127	1.781	145	[1.103]		129/128	2.792	143	[1.072]		130/128	2.176
184	gi|65332	carbonic anhydrase [Gallus gallus]	2767	33284	85	80	11	11	50.4	6.56	7.89	Quantitation summary for protein	129/126	0.656	57	1.102	*	130/126	0.797	57	1.077	*	131/126	0.665	56	1.076	*	129/127	0.635	57	1.247	*	130/127	0.754	57	[1.326]		131/127	0.664	57	1.324	*	129/128	0.78	57	[1.158]		130/128	0.935
185	gi|363745438	PREDICTED: puromycin-sensitive aminopeptidase [Gallus gallus]	2756	108581	139	116	42	39	44.1	5.03	4.27	Quantitation summary for protein	129/126	1.474	69	1.042	*	130/126	1.285	68	[1.052]		131/126	1.225	69	[1.034]		129/127	1.524	69	[1.117]		130/127	1.299	68	1.123	*	131/127	1.317	69	1.132	*	129/128	1.557	69	1.075	*	130/128	1.339
186	gi|53131390	hypothetical protein RCJMB04_11l21 [Gallus gallus]	2746	32741	93	84	20	18	59.2	4.73	25.68	Quantitation summary for protein	129/126	1.019	68	[1.080]		130/126	0.903	65	[1.068]		131/126	1.021	68	[1.057]		129/127	1.341	67	[1.306]		130/127	1.262	65	[1.296]		131/127	1.369	67	[1.338]		129/128	1.089	68	[1.139]		130/128	0.945
187	gi|60099031	hypothetical protein RCJMB04_20k15 [Gallus gallus]	2744	61405	124	96	23	21	44	8.99	10.62	Quantitation summary for protein	129/126	1.667	113	[1.076]		130/126	1.167	107	[1.058]		131/126	1.22	113	[1.057]		129/127	1.568	112	[1.197]		130/127	1.08	106	1.258	*	131/127	1.193	112	1.267	*	129/128	1.328	113	1.094	*	130/128	0.917
188	gi|363731599	PREDICTED: LOW QUALITY PROTEIN: ryanodine receptor 2 [Gallus gallus]	2743	640389	141	117	62	52	15.4	5.64	0.38	Quantitation summary for protein	129/126	1.489	116	1.03	*	130/126	1.381	115	[1.023]		131/126	1.205	115	[1.024]		129/127	1.699	116	1.082	*	130/127	1.541	115	1.089	*	131/127	1.43	115	1.088	*	129/128	2.259	115	[1.060]		130/128	2.067
189	gi|53135033	hypothetical protein RCJMB04_24e8 [Gallus gallus]	2741	48050	124	105	21	19	50.7	6.15	9.21	Quantitation summary for protein	129/126	0.913	112	1.067	*	130/126	1.055	108	1.047	*	131/126	0.89	113	[1.050]		129/127	1.093	113	[1.134]		130/127	1.253	108	1.194	*	131/127	1.123	112	1.199	*	129/128	0.905	113	[1.080]		130/128	1.052
190	gi|10801166	POP1A protein [Gallus gallus]	2733	46635	87	82	13	13	35.9	8.29	3.2	Quantitation summary for protein	129/126	1.346	83	1.086	*	130/126	1.151	81	1.068	*	131/126	1.166	83	[1.067]		129/127	1.06	83	[1.167]		130/127	1.288	81	[1.167]		131/127	0.956	83	[1.200]		129/128	1.637	83	1.13	*	130/128	1.588
191	gi|363731688	PREDICTED: monofunctional C1-tetrahydrofolate synthase, mitochondrial [Gallus gallus]	2705	114695	103	91	35	30	37.4	8.3	2.35	Quantitation summary for protein	129/126	1.457	94	[1.035]		130/126	1.128	94	[1.035]		131/126	1.104	94	1.027	*	129/127	1.346	94	1.109	*	130/127	1.018	94	[1.117]		131/127	1.061	94	1.112	*	129/128	1.261	94	[1.061]		130/128	0.962
192	gi|44969706	chaperonin subunit 8 theta [Gallus gallus]	2701	69871	102	90	26	24	47.3	5.35	5.89	Quantitation summary for protein	129/126	1.01	96	[1.039]		130/126	0.94	92	[1.031]		131/126	1.176	96	[1.029]		129/127	1.212	96	[1.096]		130/127	1.105	92	[1.118]		131/127	1.467	96	[1.125]		129/128	1.191	96	1.064	*	130/128	1.097
193	gi|363736263	PREDICTED: tubulin alpha-4A chain-like [Gallus gallus]	2685	57484	100	90	18	16	39.4	5.09	5.27	Quantitation summary for protein	129/126	1.141	3	1.065		130/126	1.127	3	1.038	*	131/126	1.088	3	1.09		129/127	0.936	3	1.184		130/127	0.904	3	1.279		131/127	0.929	3	1.347		129/128	1.066	3	1.208		130/128	1.039
194	gi|53133318	hypothetical protein RCJMB04_15g7 [Gallus gallus]	2677	23343	160	129	17	15	53.2	8.91	162.94	Quantitation summary for protein	129/126	0.921	142	1.288	*	130/126	1.081	137	[1.185]		131/126	0.842	143	[1.195]		129/127	1.026	142	[1.722]		130/127	1.282	136	[1.916]		131/127	0.972	143	[1.890]		129/128	0.932	143	1.286	*	130/128	1.085
195	gi|363727357	PREDICTED: coiled-coil-helix-coiled-coil-helix domain-containing protein 3, mitochondrial isoform 2 [Gallus gallus]	2642	31784	110	100	16	14	41.8	9.1	9.9	Quantitation summary for protein	129/126	0.776	106	[1.095]		130/126	1.001	105	1.061		131/126	0.845	106	[1.054]		129/127	0.807	106	[1.277]		130/127	1.018	105	[1.325]		131/127	0.914	106	[1.334]		129/128	0.798	106	[1.096]		130/128	1.015
196	gi|135472	RecName: Full=Tubulin beta-6 chain; AltName: Full=Beta-tubulin class-VI	2586	53900	138	115	13	11	26	4.96	7.96	Quantitation summary for protein	129/126	0.75	13	1.095	*	130/126	0.853	12	1.037	*	131/126	0.786	12	1.057	*	129/127	0.71	13	1.156	*	130/127	0.793	13	1.097	*	131/127	0.777	13	1.152	*	129/128	0.937	13	[1.104]		130/128	1.056
197	gi|363747386	PREDICTED: citrate synthase, mitochondrial-like [Gallus gallus]	2581	46829	110	95	19	16	39.3	6.5	8.45	Quantitation summary for protein	129/126	0.471	28	[1.270]		130/126	1.16	26	[1.152]		131/126	1.284	28	1.121	*	129/127	3.639	28	1.432	*	130/127	8.913	26	1.455	*	131/127	10.332	28	[1.546]		129/128	2.664	28	1.285	*	130/128	6.537
198	gi|363747068	PREDICTED: LOW QUALITY PROTEIN: transgelin-2-like [Gallus gallus]	2551	24921	114	98	19	14	75.9	9.03	42.25	Quantitation summary for protein	129/126	0.94	101	1.05	*	130/126	0.976	100	1.048	*	131/126	0.937	101	[1.033]		129/127	0.682	101	[1.125]		130/127	0.694	100	[1.127]		131/127	0.708	101	[1.152]		129/128	0.877	101	1.085	*	130/128	0.901
199	gi|1388158	myomesin [Gallus gallus]	2542	213558	136	116	47	42	29.8	5.78	1.17	Quantitation summary for protein	129/126	0.864	121	[1.038]		130/126	0.822	119	1.029	*	131/126	0.884	121	[1.025]		129/127	1.049	121	[1.088]		130/127	0.98	119	[1.107]		131/127	1.115	121	[1.117]		129/128	1.195	121	[1.053]		130/128	1.126
200	gi|53136456	hypothetical protein RCJMB04_29e19 [Gallus gallus]	2535	51226	77	68	16	13	38.6	4.51	3.47	Quantitation summary for protein	129/126	0.787	67	1.047	*	130/126	0.999	63	[1.063]		131/126	0.996	67	1.042		129/127	1.344	67	1.118	*	130/127	1.697	63	1.166	*	131/127	1.77	67	[1.152]		129/128	1.194	67	[1.076]		130/128	1.522
201	gi|60099069	hypothetical protein RCJMB04_22i13 [Gallus gallus]	2532	59073	120	96	29	23	56.8	6.92	7.74	Quantitation summary for protein	129/126	1.043	104	[1.057]		130/126	1.166	101	1.056	*	131/126	1.025	104	1.034	*	129/127	1.417	103	[1.133]		130/127	1.551	101	[1.172]		131/127	1.448	103	[1.174]		129/128	1.086	103	[1.073]		130/128	1.199
202	gi|363730685	PREDICTED: NADH dehydrogenase [ubiquinone] flavoprotein 2, mitochondrial isoform 2 [Gallus gallus]	2527	31213	137	119	14	14	51.4	8.16	17.85	Quantitation summary for protein	129/126	0.95	124	[1.097]		130/126	0.945	119	[1.064]		131/126	0.849	124	[1.054]		129/127	1.053	122	[1.184]		130/127	1.1	117	[1.236]		131/127	0.987	122	[1.259]		129/128	0.792	124	[1.122]		130/128	0.782
203	gi|517089	leucine zipper protein [Gallus gallus]	2525	51599	88	70	16	11	39.3	5.53	4	Quantitation summary for protein	129/126	0.521	78	1.101	*	130/126	0.636	76	1.053	*	131/126	0.498	78	1.076	*	129/127	0.546	77	[1.240]		130/127	0.648	77	[1.287]		131/127	0.539	77	1.303	*	129/128	0.631	77	[1.130]		130/128	0.756
204	gi|53130362	hypothetical protein RCJMB04_7e3 [Gallus gallus]	2472	40554	95	77	10	8	33.5	9.53	2.8	Quantitation summary for protein	129/126	1.083	85	1.064	*	130/126	1.14	83	1.059	*	131/126	0.996	85	1.042		129/127	1.009	85	[1.160]		130/127	1.052	83	1.215	*	131/127	0.965	85	1.208		129/128	0.944	85	[1.106]		130/128	0.983
205	gi|363745046	PREDICTED: uncharacterized protein LOC426646 [Gallus gallus]	2437	106565	80	71	13	12	25.5	9.41	0.83	Quantitation summary for protein	129/126	1.039	73	1.051	*	130/126	0.863	57	1.061	*	131/126	1.172	74	1.049	*	129/127	0.69	73	1.056	*	130/127	0.565	56	1.07	*	131/127	0.811	73	1.062	*	129/128	1.067	71	[1.056]		130/128	0.897
206	gi|833620	alpha tropomyosin of fibroblasts F2 [Gallus gallus]	2436	41795	162	111	30	23	60.2	4.72	18.39	Quantitation summary for protein	129/126	---	0	---		130/126	---	0	---		131/126	---	0	---		129/127	---	0	---		130/127	---	0	---		131/127	---	0	---		129/128	---	0	---		130/128	---
207	gi|57240090	vimentin, partial [Gallus gallus]	2424	33530	114	101	21	19	68.6	4.75	14.45	Quantitation summary for protein	129/126	0.533	13	1.104	*	130/126	0.315	10	1.223	*	131/126	0.38	12	1.124	*	129/127	0.417	13	1.116	*	130/127	0.239	9	1.155	*	131/127	0.311	13	1.23	*	129/128	0.869	11	1.074	*	130/128	0.504
208	gi|363741727	PREDICTED: adenosylhomocysteinase A [Gallus gallus]	2396	101341	91	87	14	13	17.5	9.71	0.95	Quantitation summary for protein	129/126	0.979	88	[1.033]		130/126	1.016	88	1.026	*	131/126	1.015	88	1.024	*	129/127	1.021	87	1.123		130/127	1.038	87	[1.145]		131/127	1.103	87	[1.155]		129/128	0.964	88	1.056	*	130/128	0.987
209	gi|363735918	PREDICTED: titin [Gallus gallus]	2393	4549442	142	104	58	44	1.7	6.04	0.04	Quantitation summary for protein	129/126	0.942	54	1.065	*	130/126	0.929	55	[1.048]		131/126	1.144	55	[1.057]		129/127	1.186	54	[1.123]		130/127	1.103	54	[1.150]		131/127	1.437	54	[1.180]		129/128	1.255	55	1.09	*	130/128	1.183
210	gi|212813	tropomyosin (CTm4) [Gallus gallus]	2381	41419	158	105	29	22	58.1	4.73	17.53	Quantitation summary for protein	129/126	0.537	2	1.227		130/126	0.651	2	1.03	*	131/126	0.657	2	1.053		129/127	0.472	2	1.375		130/127	0.559	2	1.737		131/127	0.6	2	1.776		129/128	0.733	2	1.002	*	130/128	0.876
211	gi|60098969	hypothetical protein RCJMB04_17g4 [Gallus gallus]	2374	61492	88	75	22	18	36.5	6.09	3.3	Quantitation summary for protein	129/126	1.041	80	[1.071]		130/126	0.951	80	1.093	*	131/126	1.004	80	[1.052]		129/127	0.605	79	[1.359]		130/127	0.539	79	[1.373]		131/127	0.606	79	[1.392]		129/128	0.96	80	[1.184]		130/128	0.864
212	gi|53127408	hypothetical protein RCJMB04_2d7 [Gallus gallus]	2364	91770	101	83	24	21	39.2	6.64	2.79	Quantitation summary for protein	129/126	0.984	87	[1.040]		130/126	1.001	87	1.047		131/126	1.045	87	1.032	*	129/127	1.113	87	[1.145]		130/127	1.105	87	[1.147]		131/127	1.229	87	[1.156]		129/128	1.116	87	[1.082]		130/128	1.119
213	gi|1763015	ubiquitin/ribosomal protein [Gallus gallus]	2349	24268	149	98	15	13	66	9.68	16.04	Quantitation summary for protein	129/126	0.827	49	1.101	*	130/126	0.821	49	[1.077]		131/126	0.81	49	1.085	*	129/127	1.075	49	[1.468]		130/127	1.042	49	[1.457]		131/127	1.094	49	[1.479]		129/128	1.026	49	[1.178]		130/128	1.003
214	gi|62851	unnamed protein product [Gallus gallus]	2337	46692	146	107	35	28	75.8	6.92	23.7	Quantitation summary for protein	129/126	0.9	120	1.034	*	130/126	0.848	114	1.044	*	131/126	0.907	120	[1.030]		129/127	0.877	120	[1.103]		130/127	0.808	113	[1.116]		131/127	0.919	120	[1.119]		129/128	0.795	121	[1.050]		130/128	0.739
215	gi|289797	YB-1 protein [Gallus gallus]	2330	39673	96	80	13	11	46.1	9.85	7.04	Quantitation summary for protein	129/126	0.615	77	[1.078]		130/126	0.829	58	[1.068]		131/126	1.106	77	[1.065]		129/127	1.085	69	1.195	*	130/127	1.974	50	1.247	*	131/127	2.132	66	1.29	*	129/128	1.2	71	1.14	*	130/128	1.867
216	gi|126751	RecName: Full=Myristoylated alanine-rich C-kinase substrate; Short=MARCKS	2323	34129	68	62	16	16	70.8	4.48	7.47	Quantitation summary for protein	129/126	0.541	58	1.285	*	130/126	0.604	49	1.148	*	131/126	0.719	60	[1.165]		129/127	1.056	47	1.454		130/127	1.163	43	[1.526]		131/127	1.461	48	[1.715]		129/128	0.842	55	1.284	*	130/128	0.929
217	gi|53130600	hypothetical protein RCJMB04_8o6 [Gallus gallus]	2315	67023	89	77	29	24	54.5	8.41	4.33	Quantitation summary for protein	129/126	1.292	14	1.043	*	130/126	1.194	14	1.087	*	131/126	1.144	14	1.062	*	129/127	1.465	14	[1.380]		130/127	1.323	14	1.371	*	131/127	1.349	14	[1.404]		129/128	1.367	14	1.094	*	130/128	1.246
218	gi|53127438	hypothetical protein RCJMB04_2g17 [Gallus gallus]	2314	40915	96	84	18	15	56.7	8.67	6.53	Quantitation summary for protein	129/126	0.659	86	[1.082]		130/126	0.932	76	[1.073]		131/126	1.167	86	[1.059]		129/127	0.647	85	[1.268]		130/127	0.93	75	[1.324]		131/127	1.19	85	[1.325]		129/128	0.99	85	1.131		130/128	1.419
219	gi|363727488	PREDICTED: laminin subunit beta-1 [Gallus gallus]	2310	222223	96	79	37	33	21.6	4.84	0.84	Quantitation summary for protein	129/126	0.946	84	[1.037]		130/126	0.88	83	[1.035]		131/126	1.013	84	[1.030]		129/127	0.766	84	[1.116]		130/127	0.696	83	[1.129]		131/127	0.853	84	[1.136]		129/128	0.951	84	[1.070]		130/128	0.872
220	gi|310750341	ubiquinone biosynthesis protein COQ9, mitochondrial [Gallus gallus]	2309	37304	56	55	7	7	23.1	5.18	2.58	Quantitation summary for protein	129/126	0.573	55	1.126	*	130/126	0.849	52	1.099	*	131/126	0.733	56	1.093	*	129/127	0.937	55	1.443		130/127	1.39	52	[1.472]		131/127	1.235	56	[1.480]		129/128	0.884	55	[1.286]		130/128	1.406
221	gi|363727954	PREDICTED: cytoskeleton-associated protein 4 [Gallus gallus]	2307	67387	79	72	24	21	45.5	4.96	3.17	Quantitation summary for protein	129/126	0.887	74	1.032	*	130/126	0.981	75	[1.039]		131/126	0.92	75	1.023	*	129/127	0.808	75	[1.126]		130/127	0.867	75	[1.152]		131/127	0.865	75	[1.134]		129/128	0.907	74	1.054	*	130/128	0.98
222	gi|293631995	DJ-1 [Gallus gallus]	2290	23813	104	89	18	17	74.6	6.32	38.38	Quantitation summary for protein	129/126	0.935	92	[1.087]		130/126	0.851	91	1.069	*	131/126	0.855	92	[1.067]		129/127	0.693	92	[1.198]		130/127	0.617	91	[1.248]		131/127	0.66	92	[1.261]		129/128	0.781	92	1.12	*	130/128	0.701
223	gi|50730713	PREDICTED: ES1 protein homolog, mitochondrial isoform 2 [Gallus gallus]	2274	28611	82	76	13	13	61.8	6.17	9.08	Quantitation summary for protein	129/126	1.094	75	1.068	*	130/126	1.076	70	[1.062]		131/126	1.086	75	1.042	*	129/127	1.514	71	1.178	*	130/127	1.453	70	[1.219]		131/127	1.557	71	[1.233]		129/128	1.105	72	[1.110]		130/128	1.07
224	gi|60098559	hypothetical protein RCJMB04_3m3 [Gallus gallus]	2270	67591	112	86	30	25	57.2	5.89	5.36	Quantitation summary for protein	129/126	1.04	94	1.041	*	130/126	0.926	92	[1.033]		131/126	1.2	94	[1.032]		129/127	1.026	94	[1.105]		130/127	0.895	92	[1.118]		131/127	1.231	94	[1.143]		129/128	1.2	94	[1.069]		130/128	1.054
225	gi|363736407	PREDICTED: LOW QUALITY PROTEIN: laminin subunit gamma-1 [Gallus gallus]	2236	198722	82	63	31	22	19.7	4.97	0.74	Quantitation summary for protein	129/126	0.928	76	1.045	*	130/126	0.886	73	[1.058]		131/126	1.06	76	1.035	*	129/127	0.95	76	1.131	*	130/127	0.895	73	[1.148]		131/127	1.129	76	[1.153]		129/128	1.105	76	[1.067]		130/128	1.046
226	gi|62992	transthyretin [Gallus gallus]	2224	18189	73	64	7	6	45.3	5.11	8.12	Quantitation summary for protein	129/126	0.585	67	[1.082]		130/126	0.826	66	1.077	*	131/126	0.445	67	1.075	*	129/127	0.38	67	[1.147]		130/127	0.523	66	1.145	*	131/127	0.3	67	[1.145]		129/128	0.493	67	[1.098]		130/128	0.686
227	gi|355390334	delta-1-pyrroline-5-carboxylate dehydrogenase, mitochondrial [Gallus gallus]	2216	68665	142	100	29	24	43.6	8.22	4.9	Quantitation summary for protein	129/126	1.028	106	[1.052]		130/126	1.049	105	[1.105]		131/126	0.929	106	[1.039]		129/127	0.889	106	[1.191]		130/127	0.888	105	[1.200]		131/127	0.836	106	[1.197]		129/128	0.874	106	[1.090]		130/128	0.88
228	gi|363744876	PREDICTED: hydroxysteroid dehydrogenase-like protein 2-like isoform 1 [Gallus gallus]	2207	53084	118	87	28	22	61.5	8.5	11.55	Quantitation summary for protein	129/126	1.503	97	1.05	*	130/126	1.19	95	[1.037]		131/126	1.184	97	1.035	*	129/127	1.233	97	1.158	*	130/127	0.969	94	1.169		131/127	1.009	97	1.178		129/128	1.455	98	[1.083]		130/128	1.142
229	gi|363729530	PREDICTED: hemopexin [Gallus gallus]	2205	45365	59	51	13	11	48.8	5.36	2.3	Quantitation summary for protein	129/126	1.028	49	[1.103]		130/126	1.508	45	[1.216]		131/126	0.816	48	1.093	*	129/127	0.548	50	[1.318]		130/127	0.791	46	[1.363]		131/127	0.437	51	[1.272]		129/128	1.031	50	[1.146]		130/128	1.489
230	gi|50732309	PREDICTED: kinesin-1 heavy chain [Gallus gallus]	2203	133560	86	71	27	22	31.8	6.06	1.22	Quantitation summary for protein	129/126	1.284	76	1.043	*	130/126	1.108	76	1.036	*	131/126	1.209	75	1.025	*	129/127	1.262	76	1.084	*	130/127	1.065	76	1.092	*	131/127	1.238	76	1.098	*	129/128	1.465	76	1.057	*	130/128	1.247
231	gi|53132373	hypothetical protein RCJMB04_13e11 [Gallus gallus]	2196	88274	101	89	25	22	32.8	6.51	3	Quantitation summary for protein	129/126	1.277	95	[1.062]		130/126	1.102	94	[1.040]		131/126	1.146	95	[1.047]		129/127	1.011	95	[1.110]		130/127	0.853	94	[1.136]		131/127	0.943	95	[1.133]		129/128	1.231	95	[1.089]		130/128	1.047
232	gi|2780941	Chain A, Chicken Citrate Synthase Complex With Trifluoroacetonyl-Coa And Citrate	2190	53691	92	84	13	12	20.6	7.36	3.17	Quantitation summary for protein	129/126	1.229	14	1.054	*	130/126	1.09	14	1.094	*	131/126	0.992	14	1.077		129/127	1.736	14	[1.196]		130/127	1.504	14	1.168	*	131/127	1.456	14	1.173	*	129/128	1.12	14	1.09	*	130/128	0.98
233	gi|53134910	hypothetical protein RCJMB04_23p16 [Gallus gallus]	2179	19136	117	89	20	15	89.6	5.58	294.07	Quantitation summary for protein	129/126	0.685	99	[1.075]		130/126	0.969	99	1.053	*	131/126	1.033	99	[1.052]		129/127	1.186	99	[1.164]		130/127	1.64	99	[1.220]		131/127	1.86	99	[1.233]		129/128	1.072	99	[1.104]		130/128	1.496
234	gi|363736202	PREDICTED: LOW QUALITY PROTEIN: calcium-binding mitochondrial carrier protein Aralar1 [Gallus gallus]	2146	84812	99	86	30	28	51.8	8.76	3.92	Quantitation summary for protein	129/126	1.086	76	[1.044]		130/126	1.157	73	1.043	*	131/126	1.064	76	1.037	*	129/127	1.68	76	1.108	*	130/127	1.753	74	1.131	*	131/127	1.712	76	1.131	*	129/128	1.244	75	[1.056]		130/128	1.31
235	gi|17907763	myosin heavy chain [Gallus gallus]	2137	273133	117	82	30	20	12.9	5.7	0.61	Quantitation summary for protein	129/126	1.565	18	1.101	*	130/126	1.312	18	1.092	*	131/126	1.414	18	1.08	*	129/127	2.722	18	[1.194]		130/127	2.231	18	1.15	*	131/127	2.559	18	1.173	*	129/128	2.307	18	[1.260]		130/128	1.908
236	gi|118096883	PREDICTED: coiled-coil-helix-coiled-coil-helix domain-containing protein 6 isoform 1 [Gallus gallus]	2136	32775	76	68	16	13	51.4	8.58	5.9	Quantitation summary for protein	129/126	0.881	7	1.092	*	130/126	1.041	6	1.148		131/126	0.893	7	1.095	*	129/127	0.664	7	1.077	*	130/127	0.771	6	1.096	*	131/127	0.7	7	1.09	*	129/128	0.688	7	1.132	*	130/128	0.795
237	gi|363744898	PREDICTED: methylcrotonoyl-CoA carboxylase beta chain, mitochondrial [Gallus gallus]	2134	68085	86	67	24	21	46.2	7.94	3.11	Quantitation summary for protein	129/126	1.152	72	1.054	*	130/126	1.136	72	[1.068]		131/126	1.093	72	1.044	*	129/127	0.907	72	[1.180]		130/127	0.874	72	[1.197]		131/127	0.894	73	[1.184]		129/128	1.049	71	[1.083]		130/128	1.02
238	gi|118090272	PREDICTED: G-rich sequence factor 1 [Gallus gallus]	2128	50722	64	60	18	18	47.3	6.55	3.25	Quantitation summary for protein	129/126	1.057	60	[1.046]		130/126	1.013	56	1.043	*	131/126	1.009	61	1.03	*	129/127	0.661	60	1.132	*	130/127	0.617	56	1.153	*	131/127	0.651	61	1.171	*	129/128	0.935	60	1.082	*	130/128	0.882
239	gi|118103065	PREDICTED: mitochondrial import inner membrane translocase subunit TIM44 [Gallus gallus]	2126	62574	107	84	28	21	46.6	8.29	5	Quantitation summary for protein	129/126	1.097	90	[1.066]		130/126	1.059	90	[1.045]		131/126	0.938	90	[1.045]		129/127	1.246	90	[1.187]		130/127	1.175	90	1.213	*	131/127	1.108	90	[1.219]		129/128	1.183	90	[1.104]		130/128	1.127
240	gi|12034955	manganese-containing superoxide dismutase precursor [Gallus gallus]	2122	28596	102	76	10	8	39.7	8.6	9.08	Quantitation summary for protein	129/126	0.757	91	[1.139]		130/126	0.936	90	[1.098]		131/126	0.734	91	1.064	*	129/127	1.203	91	[1.234]		130/127	1.465	90	[1.337]		131/127	1.215	91	[1.365]		129/128	0.553	91	[1.169]		130/128	0.677
241	gi|4572456	vitamin-D binding protein precursor [Gallus gallus]	2113	63153	86	75	18	16	37.8	6.47	2.93	Quantitation summary for protein	129/126	0.834	84	[1.038]		130/126	0.972	84	[1.030]		131/126	0.652	84	1.041	*	129/127	0.93	84	1.074	*	130/127	1.059	84	[1.097]		131/127	0.756	84	[1.099]		129/128	0.795	84	[1.053]		130/128	0.914
242	gi|12964	unnamed protein product [Gallus gallus]	2112	27098	102	89	8	8	40.1	4.57	5.41	Quantitation summary for protein	129/126	1.305	96	[1.079]		130/126	1.189	89	[1.110]		131/126	0.901	96	1.055	*	129/127	1.01	96	[1.116]		130/127	0.904	89	[1.134]		131/127	0.725	96	[1.109]		129/128	0.746	96	[1.103]		130/128	0.669
243	gi|2148922	tissue transglutaminase [Gallus gallus]	2104	85679	82	63	19	18	32.1	4.92	2.2	Quantitation summary for protein	129/126	1.543	8	1.09	*	130/126	1.925	6	1.02	*	131/126	1.216	8	1.069	*	129/127	0.802	8	1.125	*	130/127	0.986	8	1.071		131/127	0.657	8	1.11	*	129/128	0.681	8	[1.229]		130/128	0.845
244	gi|63805	tensin [Gallus gallus]	2077	209454	88	75	25	23	17	7.74	0.52	Quantitation summary for protein	129/126	0.864	2	1.319		130/126	0.881	2	1.137		131/126	0.92	2	1.106		129/127	0.621	2	1.481		130/127	0.618	2	1.276		131/127	0.687	2	1.242		129/128	0.8	2	1.08		130/128	0.804
245	gi|212449	nonmuscle myosin heavy chain [Gallus gallus]	2076	275470	99	80	44	37	23.6	5.42	0.7	Quantitation summary for protein	129/126	1.328	59	[1.039]		130/126	1.089	58	1.036	*	131/126	1.114	59	1.025	*	129/127	1.231	59	[1.110]		130/127	0.989	58	[1.132]		131/127	1.074	59	[1.137]		129/128	2.067	59	[1.081]		130/128	1.674
246	gi|23821302	hexokinase2 [Gallus gallus]	2068	117640	66	61	19	18	21	5.74	0.83	Quantitation summary for protein	129/126	1.396	28	1.041	*	130/126	1.276	28	1.033	*	131/126	1.564	28	[1.056]		129/127	1.504	28	1.105	*	130/127	1.343	28	1.115	*	131/127	1.752	28	1.146	*	129/128	1.687	28	1.077	*	130/128	1.521
247	gi|53130454	hypothetical protein RCJMB04_7p8 [Gallus gallus]	2066	55610	93	81	29	26	53.9	6.49	7.4	Quantitation summary for protein	129/126	1.071	81	[1.056]		130/126	0.96	76	1.049	*	131/126	0.92	81	1.043	*	129/127	1.063	81	[1.214]		130/127	0.931	77	[1.237]		131/127	0.949	81	[1.250]		129/128	0.819	81	[1.111]		130/128	0.724
248	gi|60099043	hypothetical protein RCJMB04_21b18 [Gallus gallus]	2065	38982	77	66	12	10	40.1	6.6	3.71	Quantitation summary for protein	129/126	0.886	63	1.074	*	130/126	0.848	52	1.082	*	131/126	1.012	63	1.072		129/127	0.855	63	[1.161]		130/127	0.816	52	[1.175]		131/127	1.015	62	1.184		129/128	0.939	62	[1.086]		130/128	0.892
249	gi|308081891	xin actin-binding repeat-containing protein 1 [Gallus gallus]	2059	337985	90	77	37	33	19.1	5.6	0.47	Quantitation summary for protein	129/126	1.321	83	[1.039]		130/126	1.062	82	[1.035]		131/126	1.384	83	[1.034]		129/127	1.295	82	1.081	*	130/127	1.024	82	1.093	*	131/127	1.421	83	1.11	*	129/128	1.659	83	1.053	*	130/128	1.315
250	gi|259835	prepro-cathepsin D [Gallus gallus]	2044	49685	102	84	15	14	37.4	5.9	5.86	Quantitation summary for protein	129/126	0.955	93	1.107	*	130/126	0.812	91	1.064	*	131/126	0.614	93	1.066	*	129/127	0.494	92	[1.261]		130/127	0.429	90	1.356	*	131/127	0.329	92	1.368	*	129/128	0.512	93	[1.167]		130/128	0.44
251	gi|222833	M-protein [Gallus gallus]	2034	188959	91	73	39	30	28.1	5.92	1.02	Quantitation summary for protein	129/126	0.799	77	[1.060]		130/126	0.845	76	1.045	*	131/126	0.685	77	1.039	*	129/127	0.999	77	1.116		130/127	1.033	76	1.15	*	131/127	0.892	77	1.149	*	129/128	1.147	77	[1.078]		130/128	1.197
252	gi|363746869	PREDICTED: 3-hydroxyacyl-CoA dehydrogenase type-2, partial [Gallus gallus]	2027	24379	61	52	12	10	73.5	8.98	20.75	Quantitation summary for protein	129/126	0.901	37	1.086	*	130/126	1.156	34	1.106	*	131/126	0.912	37	1.077	*	129/127	0.755	37	1.137	*	130/127	0.945	34	1.164	*	131/127	0.792	38	1.14	*	129/128	0.846	37	[1.094]		130/128	1.068
253	gi|619577	cardiac muscle tensin [Gallus gallus]	2024	203823	86	74	24	23	16.5	6.88	0.51	Quantitation summary for protein	129/126	---	1	---		130/126	---	1	---		131/126	---	1	---		129/127	---	1	---		130/127	---	1	---		131/127	---	1	---		129/128	---	1	---		130/128	---
254	gi|313760586	isovaleryl-CoA dehydrogenase, mitochondrial [Gallus gallus]	2024	52345	93	80	18	16	42.4	8.41	5.23	Quantitation summary for protein	129/126	1.015	86	1.048	*	130/126	0.893	82	1.044	*	131/126	0.944	86	1.03	*	129/127	1.286	86	[1.122]		130/127	1.11	82	[1.140]		131/127	1.244	86	[1.142]		129/128	1.031	86	[1.070]		130/128	0.896
255	gi|118096881	PREDICTED: coiled-coil-helix-coiled-coil-helix domain-containing protein 6 isoform 2 [Gallus gallus]	2019	33601	71	63	16	13	52.7	6.7	5.57	Quantitation summary for protein	129/126	0.664	2	1.395		130/126	2.076	2	2.57		131/126	0.98	2	1.042		129/127	0.529	2	1.401		130/127	1.615	2	1.315		131/127	0.811	2	1.876		129/128	0.598	2	1.507		130/128	1.845
256	gi|53127382	hypothetical protein RCJMB04_2b5 [Gallus gallus]	2011	70910	86	61	21	16	38.4	5.66	1.71	Quantitation summary for protein	129/126	1.151	63	[1.061]		130/126	1.032	61	1.039	*	131/126	1.225	63	[1.031]		129/127	0.972	63	1.133		130/127	0.857	61	[1.160]		131/127	1.076	63	[1.183]		129/128	1.187	63	[1.072]		130/128	1.051
257	gi|310772215	phosphatidylethanolamine-binding protein 1 [Gallus gallus]	2009	24781	78	72	11	10	80.2	6.96	15.22	Quantitation summary for protein	129/126	1.096	76	[1.057]		130/126	1.189	73	[1.101]		131/126	0.925	76	1.037	*	129/127	0.795	76	[1.123]		130/127	0.846	73	[1.134]		131/127	0.698	76	[1.160]		129/128	0.699	76	[1.077]		130/128	0.749
258	gi|63031	alpha-actinin [Gallus gallus]	2009	117154	102	78	31	28	38.6	5.26	2.01	Quantitation summary for protein	129/126	0.9	62	1.046	*	130/126	0.755	61	[1.058]		131/126	1.29	62	1.034	*	129/127	1.067	61	1.147	*	130/127	0.875	61	1.154	*	131/127	1.591	61	1.194	*	129/128	1.392	62	[1.101]		130/128	1.152
259	gi|56791762	NOGO isoform A2 [Gallus gallus]	2006	135405	75	58	28	18	34.3	4.54	0.86	Quantitation summary for protein	129/126	1.329	63	[1.066]		130/126	1.114	63	1.045	*	131/126	1.443	62	1.037	*	129/127	2.137	63	1.132	*	130/127	1.75	63	1.147	*	131/127	2.405	63	1.171	*	129/128	2.39	63	1.099	*	130/128	1.976
260	gi|833621	alpha tropomyosin of brain [Gallus gallus]	2005	33745	124	90	23	18	56.7	4.68	19.12	Quantitation summary for protein	129/126	0.669	5	1.096	*	130/126	0.697	5	1.128	*	131/126	0.674	5	1.06	*	129/127	0.36	4	1.078	*	130/127	0.433	5	[1.237]		131/127	0.445	5	[1.167]		129/128	0.527	5	1.119	*	130/128	0.542
261	gi|53132751	hypothetical protein RCJMB04_13o20 [Gallus gallus]	2005	44741	65	57	14	13	43.9	5.04	2.6	Quantitation summary for protein	129/126	0.626	58	1.065	*	130/126	0.837	57	1.039	*	131/126	0.838	58	1.027	*	129/127	0.91	57	1.133	*	130/127	1.196	56	[1.163]		131/127	1.274	57	[1.180]		129/128	0.83	58	[1.102]		130/128	1.101
262	gi|22506897	UDP-glucose pyrophosphorylase [Gallus gallus]	2004	67058	83	73	29	24	53.5	8.41	4.33	Quantitation summary for protein	129/126	1.349	8	1.068	*	130/126	1.145	8	1.089	*	131/126	1.023	8	1.096		129/127	1.054	8	1.235		130/127	0.875	8	1.27		131/127	0.832	8	1.299		129/128	1.145	8	1.091	*	130/128	0.959
263	gi|263505112	RecName: Full=Peroxiredoxin-1	2002	27570	132	90	15	13	53.3	8.24	29.84	Quantitation summary for protein	129/126	0.847	101	[1.159]		130/126	0.876	98	[1.097]		131/126	0.958	101	[1.095]		129/127	0.853	99	[1.671]		130/127	0.868	96	[1.768]		131/127	0.999	99	[1.800]		129/128	0.81	101	[1.274]		130/128	0.831
264	gi|63711	unnamed protein product [Gallus gallus]	1990	96964	110	89	33	29	39.3	4.9	2.53	Quantitation summary for protein	129/126	0.608	97	[1.039]		130/126	0.76	95	[1.030]		131/126	0.862	97	[1.023]		129/127	0.776	98	[1.111]		130/127	0.963	95	[1.128]		131/127	1.143	98	[1.158]		129/128	0.849	98	[1.061]		130/128	1.054
265	gi|53132642	hypothetical protein RCJMB04_13l7 [Gallus gallus]	1988	87097	116	92	34	29	44.5	4.96	3.89	Quantitation summary for protein	129/126	0.892	107	1.041	*	130/126	0.927	104	[1.035]		131/126	0.992	107	[1.028]		129/127	0.599	107	[1.092]		130/127	0.609	104	[1.129]		131/127	0.693	107	[1.130]		129/128	0.867	107	1.047	*	130/128	0.89
266	gi|53134709	hypothetical protein RCJMB04_23k2 [Gallus gallus]	1987	55703	77	70	25	23	59.7	5.11	5.65	Quantitation summary for protein	129/126	1.025	70	[1.061]		130/126	0.958	68	1.043	*	131/126	1.23	71	1.038	*	129/127	0.932	70	1.189	*	130/127	0.857	69	1.227	*	131/127	1.163	71	1.236	*	129/128	1.168	70	1.123	*	130/128	1.088
267	gi|125149	RecName: Full=Adenylate kinase isoenzyme 1; Short=AK 1; AltName: Full=ATP-AMP transphosphorylase 1; AltName: Full=Myokinase	1987	27054	90	76	20	14	62.4	8.68	17.22	Quantitation summary for protein	129/126	1.075	82	[1.067]		130/126	0.908	80	[1.036]		131/126	0.947	83	[1.040]		129/127	1.311	81	[1.186]		130/127	1.081	79	1.222	*	131/127	1.202	81	1.241	*	129/128	1.091	81	1.108	*	130/128	0.91
268	gi|124339781	clathrin heavy chain 1 [Gallus gallus]	1983	215943	91	79	39	32	27.3	5.52	0.85	Quantitation summary for protein	129/126	1.558	48	1.072	*	130/126	1.42	48	[1.079]		131/126	1.32	48	[1.062]		129/127	1.557	48	1.202	*	130/127	1.387	48	1.221	*	131/127	1.373	48	1.217	*	129/128	2.175	48	1.161	*	130/128	1.956
269	gi|50745282	PREDICTED: methylmalonyl-CoA mutase, mitochondrial [Gallus gallus]	1981	94510	77	66	22	20	34.4	6.33	1.98	Quantitation summary for protein	129/126	1.348	69	1.04	*	130/126	1.274	68	1.046	*	131/126	1.172	69	[1.047]		129/127	1.548	68	1.149	*	130/127	1.43	68	1.173	*	131/127	1.4	68	[1.190]		129/128	1.451	68	1.072	*	130/128	1.341
270	gi|118101401	PREDICTED: voltage-dependent anion-selective channel protein 3 [Gallus gallus]	1974	36742	77	67	14	12	57	8.85	7.66	Quantitation summary for protein	129/126	0.842	69	[1.064]		130/126	0.889	68	1.056	*	131/126	0.71	69	1.046	*	129/127	1.196	68	[1.174]		130/127	1.233	67	[1.206]		131/127	1.164	66	1.176	*	129/128	0.577	69	[1.094]		130/128	0.604
271	gi|293632001	NADH dehydrogenase ubiquinone 1 alpha subcomplex 12 transcript variant 1 [Gallus gallus]	1970	19918	89	79	9	7	48.6	9.57	7.93	Quantitation summary for protein	129/126	0.763	83	[1.040]		130/126	1.189	83	[1.066]		131/126	0.771	83	[1.034]		129/127	0.821	83	[1.141]		130/127	1.252	83	[1.158]		131/127	0.863	83	[1.146]		129/128	0.774	83	[1.068]		130/128	1.19
272	gi|53127484	hypothetical protein RCJMB04_2j13 [Gallus gallus]	1967	56593	67	62	23	21	54.3	5.72	3.11	Quantitation summary for protein	129/126	1.079	63	[1.045]		130/126	1.085	62	1.039	*	131/126	1.24	63	[1.030]		129/127	1.081	63	[1.131]		130/127	1.109	61	[1.126]		131/127	1.293	63	[1.160]		129/128	1.226	64	[1.074]		130/128	1.226
273	gi|212794	transglutaminase [Gallus gallus]	1961	86533	79	60	19	18	31.7	4.88	2.05	Quantitation summary for protein	129/126	1.164	5	1.046	*	130/126	1.612	5	1.044	*	131/126	1.308	5	1.017	*	129/127	1.464	5	1.086	*	130/127	1.982	5	1.102	*	131/127	1.711	5	1.066	*	129/128	1.729	5	1.06	*	130/128	2.363
274	gi|22775582	ATP/ADP antiporter [Gallus gallus]	1946	38096	121	112	17	16	48.3	9.78	7.74	Quantitation summary for protein	129/126	1.062	2	1.015		130/126	1.023	2	1.023		131/126	1.084	2	1.004	*	129/127	1.204	2	1.083		130/127	1.133	2	1.091		131/127	1.278	2	1.071		129/128	1.118	2	1.055		130/128	1.062
275	gi|116006719	sodium calcium exchanger [Gallus gallus]	1938	120703	98	72	26	22	26.6	4.98	1.76	Quantitation summary for protein	129/126	1.3	85	1.054	*	130/126	1.121	78	1.055	*	131/126	1.27	86	1.045	*	129/127	0.903	86	[1.191]		130/127	0.754	78	[1.222]		131/127	0.908	86	1.221	*	129/128	1.275	86	[1.100]		130/128	1.074
276	gi|63556	unnamed protein product [Gallus gallus]	1935	82286	93	69	31	27	46	6.5	3.42	Quantitation summary for protein	129/126	0.618	71	[1.063]		130/126	0.623	68	[1.085]		131/126	0.57	71	1.056	*	129/127	0.895	71	1.122	*	130/127	0.901	68	1.161	*	131/127	0.859	71	1.177	*	129/128	0.877	71	[1.074]		130/128	0.9
277	gi|363744460	PREDICTED: heterogeneous nuclear ribonucleoprotein K-like isoform 1 [Gallus gallus]	1934	52685	79	64	19	16	47.7	6.09	3.83	Quantitation summary for protein	129/126	0.988	66	1.058		130/126	0.943	60	1.059	*	131/126	1.054	66	1.039	*	129/127	1.001	66	[1.228]		130/127	1.07	61	[1.235]		131/127	1.111	66	[1.258]		129/128	1.135	65	[1.140]		130/128	1.148
278	gi|226437575	NADH dehydrogenase [ubiquinone] iron-sulfur protein 3, mitochondrial [Gallus gallus]	1934	32536	88	75	20	18	52.9	6.55	21.45	Quantitation summary for protein	129/126	0.976	78	[1.130]		130/126	0.791	78	[1.220]		131/126	0.589	78	[1.074]		129/127	0.598	78	[1.266]		130/127	0.474	78	1.333	*	131/127	0.375	78	[1.292]		129/128	0.509	78	[1.174]		130/128	0.407
279	gi|145411437	calpastatin [Gallus gallus]	1934	103219	82	66	21	19	43.6	5.44	1.25	Quantitation summary for protein	129/126	0.828	76	[1.037]		130/126	0.786	74	1.041	*	131/126	0.905	76	[1.033]		129/127	0.942	76	[1.139]		130/127	0.87	74	[1.143]		131/127	1.071	76	[1.146]		129/128	0.957	76	[1.077]		130/128	0.897
280	gi|50732786	PREDICTED: glycerol-3-phosphate dehydrogenase 1-like [Gallus gallus]	1919	45837	92	78	21	18	43.9	6.55	9.63	Quantitation summary for protein	129/126	1.471	81	1.038	*	130/126	1.152	77	[1.045]		131/126	1.044	83	[1.037]		129/127	1.328	80	[1.168]		130/127	1.016	77	[1.182]		131/127	0.963	82	[1.208]		129/128	1.328	81	[1.084]		130/128	1.025
281	gi|2315981	17-beta-hydroxysteroid dehydrogenase type IV [Gallus gallus]	1916	92528	76	68	26	24	35.8	8.58	1.84	Quantitation summary for protein	129/126	1.489	70	[1.066]		130/126	1.459	70	[1.062]		131/126	1.494	70	1.045	*	129/127	1.2	70	[1.196]		130/127	1.149	70	[1.225]		131/127	1.252	70	[1.231]		129/128	1.491	70	1.094	*	130/128	1.44
282	gi|562263	tropomodulin [Gallus gallus]	1914	46845	75	59	15	13	48.7	5	3.79	Quantitation summary for protein	129/126	0.757	5	1.091	*	130/126	0.854	5	1.12	*	131/126	1.17	5	1.101	*	129/127	1.977	4	1.038	*	130/127	1.977	5	1.162	*	131/127	2.882	5	1.149	*	129/128	1.548	5	1.087	*	130/128	1.722
283	gi|732995	pre-fibrinogen alpha subunit [Gallus gallus]	1914	65016	84	64	17	14	36.9	6.82	2.78	Quantitation summary for protein	129/126	0.676	67	1.037	*	130/126	0.844	67	1.042	*	131/126	0.549	67	[1.054]		129/127	0.794	67	[1.175]		130/127	0.969	67	[1.179]		131/127	0.67	67	[1.181]		129/128	1.221	67	[1.103]		130/128	1.505
284	gi|22128505	pyruvate carboxylase [Gallus gallus]	1913	267810	89	76	28	24	29.7	6.26	0.55	Quantitation summary for protein	129/126	1.192	73	1.05	*	130/126	1.029	71	1.041	*	131/126	0.883	73	[1.027]		129/127	1.274	73	[1.084]		130/127	1.076	72	1.095	*	131/127	0.982	73	1.089		129/128	1.297	73	1.055	*	130/128	1.105
285	gi|60098911	hypothetical protein RCJMB04_15d24 [Gallus gallus]	1907	112852	75	66	25	20	31.2	5.28	1.36	Quantitation summary for protein	129/126	1.176	65	1.058	*	130/126	1.064	61	1.048	*	131/126	1.294	65	[1.042]		129/127	1.288	64	1.128	*	130/127	1.139	61	[1.144]		131/127	1.473	64	[1.162]		129/128	1.533	65	1.078	*	130/128	1.367
286	gi|444792	Na/K ATPase:SUBUNIT=beta1	1899	42149	71	66	13	11	38	8.27	3.88	Quantitation summary for protein	129/126	1.16	69	1.038	*	130/126	1.091	67	1.045	*	131/126	1.084	69	1.027	*	129/127	1.452	69	[1.131]		130/127	1.339	67	1.117	*	131/127	1.411	69	[1.138]		129/128	1.094	69	[1.058]		130/128	1.016
287	gi|53130422	hypothetical protein RCJMB04_7l20 [Gallus gallus]	1884	80519	70	63	24	20	34.2	9.52	2.06	Quantitation summary for protein	129/126	0.997	44	1.06		130/126	1.028	44	1.075	*	131/126	1.29	44	1.07	*	129/127	0.919	44	1.14	*	130/127	0.927	44	1.152	*	131/127	1.238	44	[1.175]		129/128	1.065	44	1.069	*	130/128	1.084
288	gi|363734951	PREDICTED: adenylosuccinate synthetase isozyme 1 A [Gallus gallus]	1878	67992	70	60	14	12	31.6	6.63	1.57	Quantitation summary for protein	129/126	1.056	65	1.055	*	130/126	0.964	56	1.038	*	131/126	1.166	65	[1.041]		129/127	1.392	64	1.17	*	130/127	1.25	55	[1.166]		131/127	1.596	64	[1.206]		129/128	0.932	65	1.082	*	130/128	0.85
289	gi|363730351	PREDICTED: succinate-semialdehyde dehydrogenase, mitochondrial [Gallus gallus]	1860	61570	75	71	21	20	46.7	8.77	3.76	Quantitation summary for protein	129/126	1.074	73	[1.069]		130/126	1.134	71	[1.108]		131/126	1.198	73	1.047	*	129/127	1.078	73	[1.126]		130/127	1.113	71	[1.198]		131/127	1.251	73	[1.192]		129/128	0.98	73	[1.097]		130/128	1.021
290	gi|118090950	PREDICTED: NADH dehydrogenase [ubiquinone] iron-sulfur protein 8, mitochondrial [Gallus gallus]	1850	26441	63	59	8	8	39.2	5.84	5.71	Quantitation summary for protein	129/126	0.816	59	[1.079]		130/126	0.909	58	[1.118]		131/126	0.744	59	[1.097]		129/127	1.403	59	1.208	*	130/127	1.53	58	1.222	*	131/127	1.33	59	1.235	*	129/128	0.911	59	[1.207]		130/128	1.001
291	gi|211139	anchorin CII [Gallus gallus]	1849	41560	106	82	28	22	72.3	5.6	18.85	Quantitation summary for protein	129/126	0.768	90	[1.058]		130/126	0.862	87	[1.046]		131/126	0.841	90	[1.047]		129/127	0.609	91	[1.241]		130/127	0.821	88	[1.261]		131/127	0.694	91	[1.273]		129/128	0.763	90	[1.130]		130/128	0.874
292	gi|74048411	eukaryotic translation elongation factor 1 alpha 2 [Gallus gallus]	1848	61579	118	90	20	19	40.8	9.11	4.86	Quantitation summary for protein	129/126	0.756	54	[1.130]		130/126	1.088	50	1.084	*	131/126	1.336	54	1.095	*	129/127	1.671	54	1.391	*	130/127	2.389	50	[1.396]		131/127	3.073	54	[1.431]		129/128	1.439	54	1.201	*	130/128	2.055
293	gi|33521618	heterogeneous nuclear ribonucleoprotein H1-like protein [Gallus gallus]	1843	60941	76	65	11	9	26	5.38	1.44	Quantitation summary for protein	129/126	1.067	69	[1.041]		130/126	0.913	60	1.07	*	131/126	1.123	69	1.034	*	129/127	0.842	68	1.082	*	130/127	0.714	60	1.093	*	131/127	0.922	68	1.091	*	129/128	1.114	68	[1.062]		130/128	0.937
294	gi|11602824	tropomodulin [Gallus gallus]	1838	44607	71	55	13	12	50.4	4.97	3.81	Quantitation summary for protein	129/126	---	1	---		130/126	---	1	---		131/126	---	1	---		129/127	---	1	---		130/127	---	1	---		131/127	---	1	---		129/128	---	1	---		130/128	---
295	gi|363745002	PREDICTED: proliferation-associated protein 2G4 [Gallus gallus]	1836	56605	81	67	18	16	33.6	6.9	2.47	Quantitation summary for protein	129/126	1.002	75	1.056		130/126	1.04	75	1.041	*	131/126	1.199	75	1.041	*	129/127	1.185	75	[1.122]		130/127	1.203	75	[1.164]		131/127	1.475	75	[1.187]		129/128	1.011	75	[1.080]		130/128	1.035
296	gi|53133808	hypothetical protein RCJMB04_20j11 [Gallus gallus]	1833	50420	90	72	19	18	43.9	8.62	7.09	Quantitation summary for protein	129/126	1.308	75	1.065	*	130/126	1.095	74	[1.081]		131/126	0.982	75	1.054	*	129/127	0.879	75	[1.202]		130/127	0.719	74	[1.231]		131/127	0.686	75	[1.218]		129/128	0.98	75	[1.076]		130/128	0.81
297	gi|15341204	cgABP260 [Gallus gallus]	1829	302708	59	51	22	19	10.2	5.93	0.25	Quantitation summary for protein	129/126	0.9	51	1.036	*	130/126	0.814	50	1.05	*	131/126	0.845	51	[1.025]		129/127	0.799	51	[1.074]		130/127	0.706	50	1.076	*	131/127	0.78	51	[1.076]		129/128	1.309	51	1.068	*	130/128	1.17
298	gi|2842531	gamma-subunit of enolase [Gallus gallus]	1812	53579	54	45	13	11	38.5	4.84	1.6	Quantitation summary for protein	129/126	1.272	21	1.061	*	130/126	1.224	22	[1.065]		131/126	1.038	22	1.057	*	129/127	1.078	22	1.15	*	130/127	1.009	22	1.15		131/127	0.911	22	1.164	*	129/128	1.225	22	1.06	*	130/128	1.158
299	gi|6478775	dynamitin [Gallus gallus]	1808	50941	44	42	13	12	36.1	4.9	2.5	Quantitation summary for protein	129/126	1.011	43	[1.058]		130/126	0.957	40	[1.048]		131/126	1.043	43	[1.042]		129/127	1.023	43	[1.174]		130/127	0.958	40	1.184		131/127	1.098	43	1.223	*	129/128	1.115	43	[1.105]		130/128	1.045
300	gi|6179570	radixin [Gallus gallus]	1796	83522	115	85	33	26	44.1	6.11	3.85	Quantitation summary for protein	129/126	0.862	56	1.062	*	130/126	0.964	55	1.038	*	131/126	0.958	56	[1.035]		129/127	0.758	56	[1.133]		130/127	0.829	55	[1.172]		131/127	0.876	56	[1.191]		129/128	0.747	56	[1.097]		130/128	0.824
301	gi|21435808	translational eukaryotic inititation factor 4AII [Gallus gallus]	1795	51841	81	68	19	18	37.8	5.33	4.97	Quantitation summary for protein	129/126	0.84	66	[1.065]		130/126	0.94	62	1.049	*	131/126	1.097	66	[1.040]		129/127	1.133	66	[1.109]		130/127	1.245	62	1.106	*	131/127	1.539	66	1.132	*	129/128	0.959	66	1.078	*	130/128	1.06
302	gi|53133512	hypothetical protein RCJMB04_17g3 [Gallus gallus]	1793	70735	74	64	22	20	38.9	5.96	2.41	Quantitation summary for protein	129/126	1.113	67	1.039	*	130/126	1.007	67	1.051		131/126	1.252	67	[1.037]		129/127	1.196	67	[1.119]		130/127	1.057	67	[1.118]		131/127	1.399	67	[1.129]		129/128	1.355	67	[1.061]		130/128	1.209
303	gi|50806608	PREDICTED: thioredoxin-like 1 [Gallus gallus]	1786	37086	58	53	12	11	44.6	4.94	2.93	Quantitation summary for protein	129/126	1.063	53	1.045	*	130/126	1.155	53	1.028	*	131/126	1.267	54	[1.040]		129/127	0.985	54	[1.129]		130/127	1.068	53	[1.158]		131/127	1.218	54	[1.197]		129/128	1.245	54	1.074	*	130/128	1.348
304	gi|2623879	heat shock protein 10 [Gallus gallus]	1782	13883	113	78	16	13	81.4	8.68	124.95	Quantitation summary for protein	129/126	0.749	84	[1.107]		130/126	0.921	84	1.084	*	131/126	0.756	85	[1.091]		129/127	0.488	84	[1.277]		130/127	0.587	84	[1.308]		131/127	0.509	85	[1.322]		129/128	0.55	84	[1.198]		130/128	0.667
305	gi|53128824	hypothetical protein RCJMB04_5d11 [Gallus gallus]	1758	32587	78	71	17	15	57	4.76	21.22	Quantitation summary for protein	129/126	0.817	22	[1.202]		130/126	0.835	20	1.112	*	131/126	0.864	22	[1.105]		129/127	1.85	22	1.533	*	130/127	2.012	19	1.587	*	131/127	2.038	22	1.783	*	129/128	1.226	22	[1.379]		130/128	1.269
306	gi|363731606	PREDICTED: nidogen-1 [Gallus gallus]	1756	147625	64	62	21	21	17.6	5.07	0.69	Quantitation summary for protein	129/126	0.752	62	1.039	*	130/126	0.894	61	[1.063]		131/126	0.843	62	1.022	*	129/127	0.702	62	1.097	*	130/127	0.816	61	1.109	*	131/127	0.818	62	1.117	*	129/128	0.861	62	1.054	*	130/128	1.008
307	gi|14211655	FK506 bing protein 12 [Gallus gallus]	1755	14084	61	54	6	5	38	7.88	9.83	Quantitation summary for protein	129/126	0.98	55	[1.046]		130/126	1.048	52	[1.051]		131/126	1.017	55	[1.027]		129/127	0.606	55	[1.153]		130/127	0.628	52	[1.138]		131/127	0.654	55	[1.178]		129/128	0.835	55	[1.079]		130/128	0.91
308	gi|53127410	hypothetical protein RCJMB04_2d15 [Gallus gallus]	1722	81527	76	59	19	17	31.9	4.42	1.29	Quantitation summary for protein	129/126	0.87	61	[1.084]		130/126	1.006	61	[1.070]		131/126	1.156	61	1.049	*	129/127	1.841	60	1.102	*	130/127	2.083	61	[1.142]		131/127	2.546	61	1.192	*	129/128	1.389	61	1.077	*	130/128	1.584
309	gi|50757382	PREDICTED: prostaglandin E synthase 2 [Gallus gallus]	1722	45778	71	58	15	13	45.1	9.45	3.32	Quantitation summary for protein	129/126	0.744	63	[1.078]		130/126	0.968	60	[1.046]		131/126	0.886	63	1.042	*	129/127	0.933	63	1.111	*	130/127	1.2	60	[1.170]		131/127	1.155	63	[1.171]		129/128	0.863	62	1.075	*	130/128	1.112
310	gi|53132103	hypothetical protein RCJMB04_12m17 [Gallus gallus]	1719	55560	71	56	18	12	51.5	7.94	2.75	Quantitation summary for protein	129/126	1.11	62	1.042	*	130/126	1.164	61	1.04	*	131/126	1.268	62	1.037	*	129/127	1.41	62	[1.151]		130/127	1.449	61	[1.193]		131/127	1.675	62	[1.197]		129/128	1.29	62	[1.093]		130/128	1.335
311	gi|50760928	PREDICTED: NADH dehydrogenase [ubiquinone] 1 alpha subcomplex subunit 7 [Gallus gallus]	1718	14883	59	51	9	7	63.5	10.33	13.54	Quantitation summary for protein	129/126	0.753	54	[1.098]		130/126	0.925	49	1.05	*	131/126	0.807	54	1.045	*	129/127	1.022	50	1.262		130/127	1.258	46	1.311	*	131/127	1.129	50	1.376	*	129/128	0.958	54	1.148	*	130/128	1.189
312	gi|60098883	hypothetical protein RCJMB04_14f6 [Gallus gallus]	1716	51981	55	44	14	12	40.7	7.86	2.22	Quantitation summary for protein	129/126	0.843	47	[1.076]		130/126	0.766	37	1.095	*	131/126	1.136	47	[1.063]		129/127	1.157	47	[1.295]		130/127	1.032	37	1.263		131/127	1.622	47	[1.337]		129/128	1.137	47	1.133	*	130/128	1.021
313	gi|50800573	PREDICTED: 60S acidic ribosomal protein P2 [Gallus gallus]	1715	14356	80	69	9	9	48.7	4.42	70.39	Quantitation summary for protein	129/126	0.86	73	1.092	*	130/126	0.725	73	[1.064]		131/126	0.788	73	[1.066]		129/127	1.423	73	[1.186]		130/127	1.173	73	[1.241]		131/127	1.357	73	[1.278]		129/128	0.839	73	[1.153]		130/128	0.698
314	gi|2358016	glutathione S-transferases CL2 [Gallus gallus]	1709	29485	94	71	17	15	76.8	6.85	32.93	Quantitation summary for protein	129/126	1.158	88	[1.068]		130/126	1.248	86	1.086	*	131/126	1.004	88	1.048		129/127	1.577	87	1.228	*	130/127	1.67	85	[1.221]		131/127	1.421	87	1.224	*	129/128	1.129	88	1.115	*	130/128	1.2
315	gi|50729975	PREDICTED: SH3 domain-binding glutamic acid-rich protein [Gallus gallus]	1709	24367	70	65	11	9	59.1	4.28	7.86	Quantitation summary for protein	129/126	0.613	66	[1.062]		130/126	0.728	66	1.051	*	131/126	0.857	66	[1.048]		129/127	0.98	64	1.09		130/127	1.061	65	[1.143]		131/127	1.328	65	[1.157]		129/128	0.879	66	[1.070]		130/128	1.031
316	gi|363734458	PREDICTED: acyl-coenzyme A thioesterase 2, mitochondrial-like [Gallus gallus]	1707	51285	61	52	14	12	29.1	6.76	1.88	Quantitation summary for protein	129/126	1.234	56	1.047	*	130/126	1.203	56	[1.083]		131/126	1.08	56	[1.060]		129/127	1.088	56	1.231	*	130/127	1.036	56	1.228		131/127	0.99	56	1.233		129/128	0.982	56	1.079		130/128	0.944
317	gi|3688784	homogenin [Gallus gallus]	1706	98266	73	57	21	16	25.6	5.93	1.67	Quantitation summary for protein	129/126	0.697	66	1.068	*	130/126	0.742	65	1.054	*	131/126	0.862	66	[1.041]		129/127	0.602	66	[1.114]		130/127	0.627	65	[1.159]		131/127	0.774	66	1.181	*	129/128	0.816	66	[1.079]		130/128	0.858
318	gi|118094103	PREDICTED: 4-trimethylaminobutyraldehyde dehydrogenase [Gallus gallus]	1705	63415	78	61	22	16	41.8	7.81	4.04	Quantitation summary for protein	129/126	1.104	75	[1.072]		130/126	0.923	72	1.046	*	131/126	1.055	75	1.043	*	129/127	1.115	75	1.129	*	130/127	0.909	73	1.187	*	131/127	1.107	75	1.194	*	129/128	1.006	75	[1.074]		130/128	0.826
319	gi|363738693	PREDICTED: cAMP-dependent protein kinase type II-alpha regulatory subunit-like [Gallus gallus]	1702	50971	71	63	19	18	46	4.8	4.43	Quantitation summary for protein	129/126	1.076	65	[1.053]		130/126	0.979	63	1.053	*	131/126	1.129	65	1.038	*	129/127	1.244	65	[1.170]		130/127	1.109	63	[1.183]		131/127	1.357	65	[1.195]		129/128	1.076	65	[1.102]		130/128	0.966
320	gi|53136838	hypothetical protein RCJMB04_34n7 [Gallus gallus]	1694	31098	58	48	11	8	41.9	4.73	3.59	Quantitation summary for protein	129/126	0.771	52	[1.053]		130/126	0.862	51	1.045	*	131/126	0.885	52	1.031	*	129/127	0.499	52	[1.129]		130/127	0.543	51	[1.144]		131/127	0.596	52	[1.151]		129/128	0.661	52	[1.074]		130/128	0.728
321	gi|53136570	hypothetical protein RCJMB04_31a13 [Gallus gallus]	1694	46685	113	77	18	13	38.9	7.6	5.31	Quantitation summary for protein	129/126	1.117	96	1.042	*	130/126	1.116	93	1.061	*	131/126	1.091	96	[1.036]		129/127	1.013	96	[1.221]		130/127	1.301	93	[1.168]		131/127	1.029	96	[1.212]		129/128	1.185	96	[1.113]		130/128	1.192
322	gi|50736146	PREDICTED: NADH dehydrogenase [ubiquinone] iron-sulfur protein 6, mitochondrial isoform 3 [Gallus gallus]	1689	16381	55	46	9	9	55.5	9.22	23.21	Quantitation summary for protein	129/126	0.776	47	1.117	*	130/126	0.877	37	1.059	*	131/126	0.906	47	1.064	*	129/127	0.742	47	[1.282]		130/127	0.893	37	1.323	*	131/127	0.901	47	1.435		129/128	0.841	47	[1.187]		130/128	1
323	gi|50745031	PREDICTED: protein disulfide-isomerase A6 isoform 2 [Gallus gallus]	1686	56719	68	52	16	14	36.5	5.02	2.27	Quantitation summary for protein	129/126	0.991	56	[1.108]		130/126	0.908	54	1.09	*	131/126	1.051	56	1.061	*	129/127	0.503	56	[1.280]		130/127	0.45	54	1.351	*	131/127	0.555	56	1.397	*	129/128	0.966	56	1.153		130/128	0.873
324	gi|3851612	succinate dehydrogenase Ip subunit [Gallus gallus]	1683	39561	138	80	22	20	60.3	9.13	13.2	Quantitation summary for protein	129/126	1.345	86	[1.113]		130/126	0.965	86	1.092	*	131/126	1.078	86	[1.070]		129/127	1.123	86	[1.312]		130/127	0.788	86	[1.319]		131/127	0.937	86	[1.338]		129/128	1.427	86	[1.168]		130/128	1.01
325	gi|118095485	PREDICTED: sorting nexin-1 [Gallus gallus]	1678	68024	56	47	17	12	33.7	5.32	1.45	Quantitation summary for protein	129/126	0.952	34	1.051	*	130/126	0.936	34	[1.073]		131/126	1.005	34	1.042		129/127	0.837	34	[1.166]		130/127	0.803	34	[1.219]		131/127	0.919	34	[1.198]		129/128	0.957	34	[1.093]		130/128	0.927
326	gi|212393	myosin alkali light chain [Gallus gallus]	1669	19725	103	67	9	8	56.3	4.52	26.18	Quantitation summary for protein	129/126	0.985	66	[1.189]		130/126	0.688	66	[1.134]		131/126	1.039	66	[1.096]		129/127	1.493	66	[1.261]		130/127	1.019	66	1.237		131/127	1.639	66	1.359	*	129/128	1.321	66	[1.229]		130/128	0.91
327	gi|118083310	PREDICTED: ubiquitin carboxyl-terminal hydrolase 5 isoform 2 [Gallus gallus]	1668	106627	65	60	18	14	24.6	5.03	0.83	Quantitation summary for protein	129/126	1.344	62	1.031	*	130/126	1.246	61	1.041	*	131/126	1.28	61	1.031	*	129/127	1.645	62	[1.133]		130/127	1.497	60	[1.138]		131/127	1.627	62	[1.152]		129/128	1.924	63	[1.089]		130/128	1.763
328	gi|136399	RecName: Full=Troponin T, cardiac muscle isoforms; Short=TnTC	1660	45360	94	66	20	14	29.8	5.08	6.14	Quantitation summary for protein	129/126	0.381	76	1.099	*	130/126	0.721	71	1.093	*	131/126	1.02	76	1.063	*	129/127	0.917	76	[1.244]		130/127	1.77	71	[1.307]		131/127	2.554	76	[1.337]		129/128	0.96	76	1.134	*	130/128	1.811
329	gi|63560	unnamed protein product [Gallus gallus]	1660	77638	69	58	27	23	39.2	5.31	2.06	Quantitation summary for protein	129/126	0.589	61	1.046	*	130/126	0.707	60	1.055	*	131/126	0.649	61	1.04	*	129/127	0.801	61	[1.135]		130/127	0.943	60	[1.140]		131/127	0.918	61	[1.153]		129/128	0.99	61	1.053		130/128	1.174
330	gi|53127378	hypothetical protein RCJMB04_2a21 [Gallus gallus]	1646	46558	51	49	12	12	51	6.12	2.21	Quantitation summary for protein	129/126	0.866	25	1.079	*	130/126	0.841	23	1.153	*	131/126	0.909	25	1.083	*	129/127	0.93	25	1.277		130/127	0.886	23	1.257	*	131/127	1.015	25	1.262		129/128	0.856	25	1.151	*	130/128	0.819
331	gi|45239430	annexin I [Gallus gallus]	1638	46782	60	58	19	18	53.8	7.05	5.31	Quantitation summary for protein	129/126	1.114	51	[1.062]		130/126	1.002	48	1.045		131/126	1.129	52	[1.036]		129/127	0.859	51	1.173	*	130/127	0.757	48	[1.212]		131/127	0.905	52	[1.201]		129/128	1.076	51	1.076	*	130/128	0.963
332	gi|363731145	PREDICTED: uncharacterized protein LOC769368 [Gallus gallus]	1634	89756	60	54	12	11	21.9	4.88	1.12	Quantitation summary for protein	129/126	0.999	33	1.062		130/126	0.832	30	1.064	*	131/126	1.14	34	1.057	*	129/127	0.682	33	[1.153]		130/127	0.543	32	1.16	*	131/127	0.806	34	1.138	*	129/128	1.107	33	[1.129]		130/128	0.938
333	gi|53127778	hypothetical protein RCJMB04_3f20 [Gallus gallus]	1633	55749	75	60	18	16	49	8.1	2.74	Quantitation summary for protein	129/126	0.952	65	[1.031]		130/126	0.97	64	1.036	*	131/126	1.035	65	[1.024]		129/127	1.797	65	[1.123]		130/127	1.789	64	[1.130]		131/127	2.032	65	[1.141]		129/128	1.281	65	[1.065]		130/128	1.287
334	gi|28911960	heart fatty acid-binding protein [Gallus gallus]	1631	9961	83	80	10	8	91.2	6.11	287.43	Quantitation summary for protein	129/126	0.357	2	1.235		130/126	1.044	2	1.011		131/126	1.156	2	1.063		129/127	2.299	2	1.052	*	130/127	6.569	2	1.313		131/127	7.742	2	1.381		129/128	1.184	2	1.03		130/128	3.413
335	gi|118085838	PREDICTED: probable acyl coa dehydrogenase 6-like [Gallus gallus]	1630	50559	59	51	15	13	39	8.37	2.54	Quantitation summary for protein	129/126	1.203	52	[1.138]		130/126	1.069	50	1.088	*	131/126	0.889	52	[1.126]		129/127	1	52	[1.159]		130/127	0.87	50	1.227	*	131/127	0.769	52	1.267	*	129/128	0.649	52	[1.122]		130/128	0.567
336	gi|60098755	hypothetical protein RCJMB04_7n20 [Gallus gallus]	1613	82734	70	54	22	17	33.8	5.66	1.64	Quantitation summary for protein	129/126	1.059	58	[1.047]		130/126	0.937	56	1.049	*	131/126	1.269	58	1.041	*	129/127	0.984	59	[1.189]		130/127	0.956	56	[1.158]		131/127	1.228	59	[1.198]		129/128	1.571	59	[1.108]		130/128	1.4
337	gi|363734903	PREDICTED: fermitin family homolog 2 isoform 2 [Gallus gallus]	1608	93449	83	63	20	19	30.7	6.22	1.45	Quantitation summary for protein	129/126	1.344	72	1.039	*	130/126	1.205	70	[1.044]		131/126	1.243	72	[1.035]		129/127	1.465	73	[1.131]		130/127	1.286	70	[1.134]		131/127	1.41	73	[1.152]		129/128	1.51	71	1.07	*	130/128	1.336
338	gi|118084276	PREDICTED: 28S ribosomal protein S9, mitochondrial isoform 2 [Gallus gallus]	1607	50345	53	52	14	14	42.7	9.5	1.76	Quantitation summary for protein	129/126	1.053	53	[1.046]		130/126	1.103	53	[1.045]		131/126	1.166	53	[1.048]		129/127	1.174	53	[1.114]		130/127	1.202	53	1.142	*	131/127	1.352	53	1.157	*	129/128	1.123	53	1.067	*	130/128	1.161
339	gi|363743351	PREDICTED: 26S protease regulatory subunit 8 [Gallus gallus]	1605	54335	65	58	16	15	50.1	7.11	2.86	Quantitation summary for protein	129/126	1.089	43	1.046	*	130/126	1.018	43	1.058	*	131/126	1.197	43	1.044	*	129/127	1.139	43	1.192	*	130/127	1.04	43	1.191		131/127	1.302	43	1.206	*	129/128	1.224	43	[1.102]		130/128	1.129
340	gi|50752381	PREDICTED: alpha-2-HS-glycoprotein [Gallus gallus]	1604	41298	67	62	8	7	29.1	5.77	1.52	Quantitation summary for protein	129/126	0.7	63	1.085	*	130/126	0.723	60	1.084	*	131/126	0.537	63	[1.070]		129/127	0.514	63	1.185	*	130/127	0.519	60	[1.200]		131/127	0.411	63	1.197	*	129/128	0.574	63	[1.101]		130/128	0.585
341	gi|60098817	hypothetical protein RCJMB04_11a3 [Gallus gallus]	1599	72974	56	45	16	13	32.6	4.98	1.02	Quantitation summary for protein	129/126	1.327	44	[1.073]		130/126	1.102	36	1.041	*	131/126	1.246	44	[1.059]		129/127	1.696	41	[1.146]		130/127	1.485	36	[1.148]		131/127	1.644	41	[1.187]		129/128	1.743	43	[1.083]		130/128	1.597
342	gi|363742034	PREDICTED: phosphopantothenate--cysteine ligase-like [Gallus gallus]	1594	36040	57	46	13	13	52.1	6.47	4.8	Quantitation summary for protein	129/126	0.777	53	[1.052]		130/126	0.918	51	[1.050]		131/126	0.871	53	[1.044]		129/127	1.075	53	[1.090]		130/127	1.247	51	[1.107]		131/127	1.253	53	[1.112]		129/128	0.862	53	1.052	*	130/128	1.006
343	gi|608483	kinectin [Gallus gallus]	1579	196440	101	74	43	32	33.2	5.72	0.9	Quantitation summary for protein	129/126	1.269	79	1.046	*	130/126	1.051	78	[1.045]		131/126	1.202	79	[1.036]		129/127	1.219	78	[1.141]		130/127	0.987	77	[1.148]		131/127	1.2	78	[1.159]		129/128	1.544	79	1.095	*	130/128	1.261
344	gi|2338714	restin [Gallus gallus]	1571	198050	64	54	32	26	24.1	5.27	0.63	Quantitation summary for protein	129/126	1.402	55	[1.032]		130/126	1.167	55	[1.040]		131/126	1.274	55	[1.022]		129/127	1.471	55	[1.095]		130/127	1.197	55	1.099	*	131/127	1.39	55	1.103	*	129/128	1.831	55	1.055	*	130/128	1.504
345	gi|3420726	Rab-GDP dissociation inhibitor [Gallus gallus]	1569	58669	77	61	20	20	46.4	5.23	3.6	Quantitation summary for protein	129/126	1.033	64	[1.074]		130/126	1.189	63	[1.075]		131/126	1.205	65	1.04	*	129/127	1.385	64	1.186	*	130/127	1.567	63	[1.197]		131/127	1.682	64	1.229	*	129/128	1.404	64	[1.117]		130/128	1.597
346	gi|1149509	37kD Laminin receptor precursor /p40 ribosomal associated protein [Gallus gallus]	1568	35865	72	59	13	12	44.6	4.8	5.4	Quantitation summary for protein	129/126	0.758	63	[1.081]		130/126	0.901	55	1.071	*	131/126	0.998	63	[1.046]		129/127	0.859	63	1.143	*	130/127	1.034	55	1.164		131/127	1.177	63	1.193	*	129/128	0.978	63	1.071	*	130/128	1.159
347	gi|53136442	hypothetical protein RCJMB04_29b18 [Gallus gallus]	1565	26121	56	46	13	8	61.5	5.58	4.4	Quantitation summary for protein	129/126	0.792	47	1.059	*	130/126	0.93	47	1.124	*	131/126	0.934	48	1.062	*	129/127	0.842	48	1.128	*	130/127	0.972	47	1.121		131/127	1.039	48	1.164		129/128	0.777	48	[1.084]		130/128	0.906
348	gi|363743735	PREDICTED: perilipin-3-like [Gallus gallus]	1557	51375	57	51	19	17	50.3	6.03	3.73	Quantitation summary for protein	129/126	1.074	53	[1.033]		130/126	1.105	52	1.03	*	131/126	1.159	53	[1.029]		129/127	0.936	52	[1.093]		130/127	0.946	51	[1.090]		131/127	1.051	52	[1.096]		129/128	0.933	52	[1.038]		130/128	0.947
349	gi|3641556	fibrinogen gamma chain precursor [Gallus gallus]	1545	56598	69	60	17	14	39.5	5.48	1.93	Quantitation summary for protein	129/126	0.66	64	[1.032]		130/126	0.872	64	1.027	*	131/126	0.554	64	[1.043]		129/127	1.163	64	[1.115]		130/127	1.503	64	[1.122]		131/127	1.016	65	[1.110]		129/128	1.068	64	1.049	*	130/128	1.392
350	gi|63797	stathmin [Gallus gallus]	1544	24058	60	53	13	10	59	7.97	9.39	Quantitation summary for protein	129/126	0.809	56	1.046	*	130/126	0.86	55	[1.062]		131/126	1.251	56	1.053	*	129/127	0.419	56	[1.204]		130/127	0.435	55	[1.244]		131/127	0.673	56	[1.250]		129/128	0.731	56	[1.082]		130/128	0.767
351	gi|12964598	branched-chain alpha-keto acid dehydrogenase E1-alpha subunit [Gallus gallus]	1530	52789	102	83	20	16	42.1	8.63	4.78	Quantitation summary for protein	129/126	0.899	91	[1.053]		130/126	1.091	91	[1.051]		131/126	1.132	91	[1.052]		129/127	1.205	92	[1.122]		130/127	1.436	91	[1.142]		131/127	1.575	92	[1.206]		129/128	1.196	92	1.096	*	130/128	1.434
352	gi|60098409	hypothetical protein RCJMB04_1m16 [Gallus gallus]	1529	133882	57	50	24	19	27	7.85	0.83	Quantitation summary for protein	129/126	1.471	53	1.041	*	130/126	1.238	52	[1.078]		131/126	1.137	53	[1.032]		129/127	1.164	53	1.149	*	130/127	0.957	52	1.162	*	131/127	0.936	53	1.151	*	129/128	1.309	53	1.079	*	130/128	1.086
353	gi|363740639	PREDICTED: myosin heavy chain, skeletal muscle, adult [Gallus gallus]	1524	272844	73	57	21	17	9.2	5.69	0.38	Quantitation summary for protein	129/126	1.37	5	1.059	*	130/126	0.849	5	[1.140]		131/126	1.627	5	1.058	*	129/127	5.349	5	[1.162]		130/127	3.239	5	1.251	*	131/127	6.607	5	1.184	*	129/128	4.482	4	1.025	*	130/128	2.86
354	gi|17433708	RecName: Full=Cofilin-2; AltName: Full=Cofilin, muscle isoform	1521	24493	104	71	14	11	79.5	7.66	15.62	Quantitation summary for protein	129/126	0.901	85	[1.048]		130/126	0.974	84	[1.123]		131/126	0.971	85	1.038	*	129/127	1.952	85	[1.203]		130/127	2.065	84	1.19	*	131/127	2.187	85	[1.193]		129/128	1.113	85	1.078	*	130/128	1.187
355	gi|118083465	PREDICTED: NADH dehydrogenase [ubiquinone] 1 beta subcomplex subunit 4 [Gallus gallus]	1521	21840	55	51	5	4	32.9	9.46	2.13	Quantitation summary for protein	129/126	0.937	53	1.065	*	130/126	1.04	53	1.05	*	131/126	0.779	53	[1.044]		129/127	0.737	53	[1.074]		130/127	0.8	53	[1.107]		131/127	0.638	53	[1.101]		129/128	0.655	53	1.056	*	130/128	0.718
356	gi|88909611	RecName: Full=Elongation factor Tu, mitochondrial; Short=EF-Tu; Flags: Precursor	1520	41032	74	57	18	16	61.6	8.98	5.93	Quantitation summary for protein	129/126	1.277	60	[1.047]		130/126	1.242	58	[1.056]		131/126	1.101	60	[1.045]		129/127	1.256	59	[1.115]		130/127	1.192	56	1.1	*	131/127	1.126	59	[1.116]		129/128	1.471	60	[1.078]		130/128	1.413
357	gi|238786	5-aminoimidazole-4-carboxamide-ribonucleotide transformylase-IMP cyclohydrolase [Gallus gallus]	1517	73596	61	53	20	19	37.3	8.4	2.11	Quantitation summary for protein	129/126	1.152	53	1.047	*	130/126	1.048	52	[1.050]		131/126	1.02	53	1.035	*	129/127	0.771	53	[1.172]		130/127	0.763	52	[1.173]		131/127	0.709	53	1.202	*	129/128	1.059	53	1.089	*	130/128	0.962
358	gi|363734430	PREDICTED: EH domain-containing protein 4-like [Gallus gallus]	1514	64826	76	58	21	17	39.2	6.55	2.99	Quantitation summary for protein	129/126	1.269	61	1.065	*	130/126	1.067	60	[1.081]		131/126	1.073	61	[1.058]		129/127	1.052	60	[1.375]		130/127	0.865	60	[1.387]		131/127	0.925	60	[1.383]		129/128	1.072	61	[1.187]		130/128	0.89
359	gi|60098469	hypothetical protein RCJMB04_2k14 [Gallus gallus]	1504	87606	54	46	20	18	32.5	6.17	1.41	Quantitation summary for protein	129/126	1.404	49	[1.059]		130/126	1.244	46	1.042	*	131/126	1.248	49	1.051	*	129/127	1.476	49	1.179	*	130/127	1.271	47	1.211	*	131/127	1.365	49	1.218	*	129/128	1.48	49	1.104	*	130/128	1.286
360	gi|60098585	hypothetical protein RCJMB04_3n20 [Gallus gallus]	1492	69586	81	64	27	23	51.8	5.53	3.37	Quantitation summary for protein	129/126	1.101	73	[1.037]		130/126	1.025	71	[1.028]		131/126	1.268	73	[1.025]		129/127	1.164	73	1.1	*	130/127	1.059	71	1.12	*	131/127	1.394	73	1.123	*	129/128	1.257	72	[1.060]		130/128	1.151
361	gi|343790924	aldo-keto reductase family 1, member B1-like [Gallus gallus]	1489	42659	81	68	16	14	50.6	7.14	5	Quantitation summary for protein	129/126	---	0	---		130/126	---	0	---		131/126	---	0	---		129/127	---	0	---		130/127	---	0	---		131/127	---	0	---		129/128	---	0	---		130/128	---
362	gi|118097118	PREDICTED: LIM and cysteine-rich domains protein 1 [Gallus gallus]	1488	47544	70	59	18	16	58.3	8.53	4.36	Quantitation summary for protein	129/126	1.348	61	[1.117]		130/126	1.103	61	[1.129]		131/126	1.372	61	[1.178]		129/127	1.442	60	1.156	*	130/127	1.156	61	[1.166]		131/127	1.531	61	[1.188]		129/128	1.703	61	1.121	*	130/128	1.374
363	gi|211813	SM22 [Gallus gallus]	1484	26711	45	43	11	10	53.5	8.85	7.29	Quantitation summary for protein	129/126	0.678	35	1.051	*	130/126	0.755	35	1.06	*	131/126	0.947	35	[1.041]		129/127	0.861	35	[1.147]		130/127	0.998	34	1.115		131/127	1.34	34	1.159	*	129/128	0.803	34	1.074	*	130/128	0.906
364	gi|53130844	hypothetical protein RCJMB04_10g10 [Gallus gallus]	1480	33308	74	70	17	15	48.2	4.81	9.75	Quantitation summary for protein	129/126	1.071	45	[1.116]		130/126	0.958	45	[1.049]		131/126	1.091	45	[1.059]		129/127	0.702	45	1.231	*	130/127	0.614	45	[1.338]		131/127	0.744	45	[1.353]		129/128	0.906	45	1.121	*	130/128	0.799
365	gi|363731918	PREDICTED: angiotensinogen [Gallus gallus]	1479	60581	63	57	18	16	39.1	5.41	2.55	Quantitation summary for protein	129/126	1.074	60	[1.041]		130/126	1.353	60	1.039	*	131/126	1.216	60	[1.037]		129/127	0.871	61	[1.126]		130/127	1.076	60	1.147	*	131/127	1.024	61	1.164		129/128	1.058	61	[1.081]		130/128	1.316
366	gi|63553	unnamed protein product [Gallus gallus]	1473	51091	100	67	20	14	50.9	6.5	4.08	Quantitation summary for protein	129/126	2.681	52	1.091	*	130/126	0.953	52	[1.134]		131/126	0.455	52	1.1	*	129/127	2.728	52	1.186	*	130/127	0.948	52	[1.225]		131/127	0.482	52	[1.189]		129/128	3.978	52	1.132	*	130/128	1.395
367	gi|18252632	zipcode-binding protein [Gallus gallus]	1471	88613	72	61	19	17	22.2	6.46	0.99	Quantitation summary for protein	129/126	1.061	61	[1.049]		130/126	1.042	60	1.053	*	131/126	1.205	61	1.028	*	129/127	0.841	61	[1.099]		130/127	0.806	60	[1.113]		131/127	0.992	61	[1.147]		129/128	1.083	61	1.041	*	130/128	1.048
368	gi|212347	myosin a1 light chain (partial), partial [Gallus gallus]	1468	23421	95	61	8	8	51.4	4.72	13.46	Quantitation summary for protein	129/126	1.968	19	1.102	*	130/126	0.604	19	1.101	*	131/126	0.471	19	1.142	*	129/127	2.191	19	1.177	*	130/127	0.657	19	1.129	*	131/127	0.546	19	[1.138]		129/128	3.124	19	1.216	*	130/128	0.946
369	gi|363743617	PREDICTED: lon protease homolog, mitochondrial [Gallus gallus]	1467	111460	69	66	26	24	28.8	5.8	1.52	Quantitation summary for protein	129/126	1.341	66	[1.053]		130/126	1.176	63	1.037	*	131/126	1.145	66	1.027	*	129/127	1.967	66	1.152	*	130/127	1.688	63	1.15	*	131/127	1.746	66	1.161	*	129/128	1.55	66	1.08	*	130/128	1.345
370	gi|53136800	hypothetical protein RCJMB04_34b10 [Gallus gallus]	1467	89903	71	61	25	21	34.7	6.1	1.45	Quantitation summary for protein	129/126	1.356	60	[1.072]		130/126	1.225	59	1.061	*	131/126	1.31	60	1.043	*	129/127	1.017	60	[1.192]		130/127	0.898	59	[1.244]		131/127	1.022	60	[1.246]		129/128	1.152	60	[1.105]		130/128	1.026
371	gi|13992475	putative FK506-binding protein [Gallus gallus]	1459	33323	51	43	13	11	47.1	9.2	4.53	Quantitation summary for protein	129/126	0.878	44	[1.069]		130/126	0.921	44	[1.072]		131/126	1.086	44	[1.044]		129/127	0.822	44	[1.227]		130/127	0.843	44	[1.262]		131/127	1.059	44	[1.300]		129/128	0.887	44	[1.163]		130/128	0.918
372	gi|313747471	cysteine and glycine-rich protein 3 [Gallus gallus]	1451	27240	78	64	12	10	46.9	9.02	7.02	Quantitation summary for protein	129/126	1.212	64	[1.113]		130/126	1.028	56	[1.103]		131/126	1.174	64	[1.077]		129/127	0.871	67	[1.462]		130/127	0.836	56	[1.523]		131/127	0.875	67	[1.603]		129/128	1.177	67	[1.288]		130/128	1.061
373	gi|118453	RecName: Full=Desmin	1448	58575	62	48	19	14	41.5	5.45	2.51	Quantitation summary for protein	129/126	0.749	10	[1.093]		130/126	0.544	10	1.149	*	131/126	0.449	10	1.065	*	129/127	0.706	10	[1.267]		130/127	0.502	10	1.226	*	131/127	0.441	10	[1.307]		129/128	1.289	10	1.112	*	130/128	0.924
374	gi|313747557	catenin alpha-3 [Gallus gallus]	1442	116941	60	51	20	19	26.7	6.71	0.94	Quantitation summary for protein	129/126	1.191	47	1.043	*	130/126	1.018	47	1.052	*	131/126	0.893	47	[1.031]		129/127	1.102	47	[1.093]		130/127	0.921	47	1.119	*	131/127	0.86	47	[1.110]		129/128	1.74	47	1.059	*	130/128	1.468
375	gi|118101731	PREDICTED: polyadenylate-binding protein 4 [Gallus gallus]	1438	80584	51	45	16	14	24.3	9.55	1.05	Quantitation summary for protein	129/126	1.084	24	1.047	*	130/126	1.054	24	[1.033]		131/126	1.301	24	[1.040]		129/127	1.374	24	[1.151]		130/127	1.305	24	[1.159]		131/127	1.714	24	[1.184]		129/128	1.366	24	1.109	*	130/128	1.309
376	gi|53127794	hypothetical protein RCJMB04_3g13 [Gallus gallus]	1436	71455	88	64	19	16	34	6.17	2.85	Quantitation summary for protein	129/126	0.864	72	1.056	*	130/126	0.899	72	[1.061]		131/126	0.908	72	1.042	*	129/127	0.69	72	1.142	*	130/127	0.701	72	1.169	*	131/127	0.754	72	1.16	*	129/128	0.656	72	1.131	*	130/128	0.673
377	gi|363745122	PREDICTED: aldo-keto reductase family 1 member B10-like [Gallus gallus]	1435	42375	76	64	15	14	50.6	6.6	4.21	Quantitation summary for protein	129/126	---	0	---		130/126	---	0	---		131/126	---	0	---		129/127	---	0	---		130/127	---	0	---		131/127	---	0	---		129/128	---	0	---		130/128	---
378	gi|42627797	TPA: putative ISG12(2) protein [Gallus gallus]	1432	11707	39	33	5	5	72	10.18	12.28	Quantitation summary for protein	129/126	0.156	36	[1.319]		130/126	0.23	35	[1.214]		131/126	0.201	36	[1.252]		129/127	0.47	35	1.132	*	130/127	0.715	35	[1.102]		131/127	0.661	36	[1.128]		129/128	0.519	36	1.142	*	130/128	0.758
379	gi|8670805	T-complex protein 1 delta subunit [Gallus gallus]	1425	67667	57	50	18	16	40.5	7.94	1.58	Quantitation summary for protein	129/126	1.165	53	[1.079]		130/126	0.932	53	1.055	*	131/126	1.137	53	[1.063]		129/127	0.821	53	[1.218]		130/127	0.642	53	[1.222]		131/127	0.833	53	[1.238]		129/128	1.108	53	[1.129]		130/128	0.874
380	gi|47846181	basement membrane-specific heparan sulfate proteoglycan core protein precursor [Gallus gallus]	1421	458531	83	67	32	27	8.5	5.85	0.24	Quantitation summary for protein	129/126	0.814	70	1.032	*	130/126	0.911	71	1.052	*	131/126	0.89	71	[1.027]		129/127	0.602	70	[1.107]		130/127	0.658	71	1.124	*	131/127	0.683	71	[1.116]		129/128	0.883	70	[1.061]		130/128	0.975
381	gi|992994	myosin light chain kinase [Gallus gallus]	1419	131764	61	50	11	10	12.9	5.28	0.44	Quantitation summary for protein	129/126	1.086	57	[1.056]		130/126	0.883	55	[1.051]		131/126	1.01	57	1.035	*	129/127	1.077	57	[1.110]		130/127	0.855	55	[1.105]		131/127	1.042	57	[1.125]		129/128	1.074	57	[1.110]		130/128	0.859
382	gi|118099288	PREDICTED: carnitine O-acetyltransferase [Gallus gallus]	1418	82326	98	77	21	19	30.9	8.74	2.63	Quantitation summary for protein	129/126	0.952	89	[1.046]		130/126	0.998	89	1.049		131/126	0.877	89	[1.035]		129/127	1.104	89	[1.142]		130/127	1.131	89	[1.130]		131/127	1.058	89	[1.138]		129/128	0.899	89	[1.069]		130/128	0.93
383	gi|118095339	PREDICTED: elongation factor G, mitochondrial [Gallus gallus]	1413	93352	75	60	22	18	30.1	6.76	1.29	Quantitation summary for protein	129/126	1.145	65	1.043	*	130/126	1.089	65	1.031	*	131/126	1.152	65	1.028	*	129/127	1.046	65	[1.115]		130/127	0.973	65	[1.145]		131/127	1.095	65	[1.158]		129/128	1.187	65	[1.068]		130/128	1.114
384	gi|363730673	PREDICTED: AFG3-like protein 2 [Gallus gallus]	1412	103232	84	62	31	27	39.5	8.91	1.89	Quantitation summary for protein	129/126	1.374	66	1.033	*	130/126	1.231	65	1.038	*	131/126	1.147	66	1.029	*	129/127	1.157	66	[1.081]		130/127	1.011	66	1.099		131/127	1.004	66	1.094		129/128	1.352	66	[1.055]		130/128	1.193
385	gi|115592	RecName: Full=F-actin-capping protein subunit alpha-1; AltName: Full=Beta-actinin subunit I; AltName: Full=CapZ 36/32	1411	37923	43	40	8	7	29	5.43	1.73	Quantitation summary for protein	129/126	0.854	33	1.042	*	130/126	0.849	31	1.044	*	131/126	1.033	33	1.03	*	129/127	0.748	32	[1.160]		130/127	0.74	30	[1.181]		131/127	0.917	33	[1.178]		129/128	0.928	33	[1.075]		130/128	0.928
386	gi|53129426	hypothetical protein RCJMB04_5l9 [Gallus gallus]	1409	135451	63	45	22	17	23.4	5.14	0.77	Quantitation summary for protein	129/126	0.884	52	1.045	*	130/126	0.897	51	1.031	*	131/126	1.122	52	[1.038]		129/127	1.102	52	1.122	*	130/127	1.101	51	[1.145]		131/127	1.455	52	1.166	*	129/128	0.993	52	1.069		130/128	0.996
387	gi|4514720	ezrin [Gallus gallus]	1404	82271	106	80	32	26	39.1	5.9	4.16	Quantitation summary for protein	129/126	0.923	56	[1.043]		130/126	0.995	56	[1.040]		131/126	1.119	56	[1.036]		129/127	1.24	56	[1.107]		130/127	1.307	56	[1.134]		131/127	1.565	56	[1.139]		129/128	1.284	56	[1.074]		130/128	1.366
388	gi|53136740	hypothetical protein RCJMB04_33d2 [Gallus gallus]	1399	68832	48	43	13	11	28.5	6.25	0.92	Quantitation summary for protein	129/126	1.447	32	[1.148]		130/126	1.018	31	[1.121]		131/126	1.252	32	[1.079]		129/127	1.523	32	[1.237]		130/127	1.047	31	[1.374]		131/127	1.37	32	[1.369]		129/128	1.734	32	[1.167]		130/128	1.203
389	gi|1621230	HEMCAM [Gallus gallus]	1399	78108	64	53	18	15	30.5	6.94	1.47	Quantitation summary for protein	129/126	0.928	56	1.047	*	130/126	0.991	55	[1.052]		131/126	0.925	56	1.03	*	129/127	0.937	55	1.096	*	130/127	0.978	55	1.115		131/127	0.969	56	1.114	*	129/128	0.832	56	1.048	*	130/128	0.876
390	gi|363738636	PREDICTED: dolichyl-diphosphooligosaccharide--protein glycosyltransferase subunit 1, partial [Gallus gallus]	1398	71113	60	52	14	10	23.3	6.42	0.8	Quantitation summary for protein	129/126	1.253	55	[1.021]		130/126	1.086	55	1.023	*	131/126	1.205	55	1.017	*	129/127	1.249	55	1.067	*	130/127	1.058	55	1.067	*	131/127	1.249	55	1.075	*	129/128	1.299	55	1.041	*	130/128	1.11
391	gi|118096822	PREDICTED: transketolase [Gallus gallus]	1396	79694	56	46	15	14	24.7	7.27	1.33	Quantitation summary for protein	129/126	0.91	53	[1.098]		130/126	0.97	51	[1.049]		131/126	1.132	53	1.042	*	129/127	0.767	53	[1.177]		130/127	0.809	51	[1.219]		131/127	0.993	53	[1.275]		129/128	0.814	53	[1.106]		130/128	0.862
392	gi|293597548	calcium channel, voltage-dependent, alpha 2/delta subunit 1 preproprotein [Gallus gallus]	1395	139738	74	66	22	20	21.4	5.09	1	Quantitation summary for protein	129/126	1.051	69	[1.060]		130/126	1.089	68	[1.112]		131/126	0.864	69	[1.039]		129/127	0.7	69	1.141	*	130/127	0.709	68	[1.204]		131/127	0.599	69	1.195	*	129/128	0.644	69	[1.088]		130/128	0.658
393	gi|63511	heat shock protein 47 [Gallus gallus]	1385	54877	68	57	18	17	43.7	8.74	3.3	Quantitation summary for protein	129/126	0.8	60	1.04	*	130/126	1.198	60	[1.060]		131/126	1.092	61	1.026	*	129/127	0.824	60	1.094	*	130/127	1.232	60	1.143	*	131/127	1.192	61	[1.142]		129/128	0.784	61	[1.060]		130/128	1.145
394	gi|363734959	PREDICTED: protein AHNAK2-like [Gallus gallus]	1383	193442	48	41	12	10	9.9	6.3	0.29	Quantitation summary for protein	129/126	0.901	36	1.082	*	130/126	0.76	33	1.073	*	131/126	0.748	36	1.055	*	129/127	1.122	36	1.171	*	130/127	0.933	33	[1.203]		131/127	0.969	36	[1.208]		129/128	0.985	36	[1.074]		130/128	0.825
395	gi|53127340	hypothetical protein RCJMB04_1o7 [Gallus gallus]	1376	25702	63	50	15	11	72.5	9.18	7.97	Quantitation summary for protein	129/126	0.797	49	1.058	*	130/126	0.766	49	1.094	*	131/126	0.861	49	1.051	*	129/127	0.942	49	[1.290]		130/127	0.885	49	1.314	*	131/127	1.059	49	[1.328]		129/128	0.786	49	[1.107]		130/128	0.745
396	gi|60098761	hypothetical protein RCJMB04_8b2 [Gallus gallus]	1370	92571	55	49	16	14	25.2	5.18	1.15	Quantitation summary for protein	129/126	0.891	51	[1.039]		130/126	0.812	49	1.045	*	131/126	0.973	51	1.031	*	129/127	1.032	50	[1.145]		130/127	0.922	48	[1.161]		131/127	1.172	50	[1.173]		129/128	1.215	51	[1.089]		130/128	1.092
397	gi|53131721	hypothetical protein RCJMB04_12b19 [Gallus gallus]	1369	128316	78	60	23	19	25.6	6.45	0.97	Quantitation summary for protein	129/126	1.15	71	[1.056]		130/126	1.118	71	[1.041]		131/126	1.131	71	1.027	*	129/127	1.612	71	1.102	*	130/127	1.532	71	1.12	*	131/127	1.649	71	1.135	*	129/128	1.381	71	1.06	*	130/128	1.324
398	gi|363740095	PREDICTED: putative acyl-CoA dehydrogenase AidB-like [Gallus gallus]	1368	76561	53	47	17	16	33.1	7.53	1.41	Quantitation summary for protein	129/126	1.21	48	1.069	*	130/126	1.471	49	1.093	*	131/126	0.934	49	[1.066]		129/127	0.965	49	1.129	*	130/127	1.156	49	1.14	*	131/127	0.781	49	1.148	*	129/128	0.784	49	[1.142]		130/128	0.947
399	gi|363730693	PREDICTED: LOW QUALITY PROTEIN: erythrocyte membrane protein band 4.1-like 3 [Gallus gallus]	1368	142272	60	53	21	18	22.7	5.37	0.89	Quantitation summary for protein	129/126	0.807	52	1.053	*	130/126	0.815	51	1.058	*	131/126	0.847	52	1.065	*	129/127	0.655	52	1.149	*	130/127	0.647	51	1.159	*	131/127	0.715	52	1.175	*	129/128	0.958	52	1.101	*	130/128	0.954
400	gi|53128551	hypothetical protein RCJMB04_4o23 [Gallus gallus]	1366	53016	62	48	22	16	56.9	7.66	2.76	Quantitation summary for protein	129/126	0.916	47	[1.064]		130/126	1.171	47	[1.080]		131/126	0.891	47	1.049	*	129/127	1.163	47	[1.120]		130/127	1.453	47	[1.156]		131/127	1.178	47	[1.178]		129/128	0.878	47	1.087	*	130/128	1.106
401	gi|363728518	PREDICTED: brain protein 44 [Gallus gallus]	1360	17058	82	73	8	6	42.9	10.09	7.73	Quantitation summary for protein	129/126	1.276	77	[1.090]		130/126	1.261	75	[1.066]		131/126	1.348	77	[1.074]		129/127	0.598	78	[1.187]		130/127	0.593	75	[1.281]		131/127	0.653	78	[1.284]		129/128	0.735	78	[1.151]		130/128	0.73
402	gi|118100855	PREDICTED: probable aminopeptidase NPEPL1 [Gallus gallus]	1357	62410	60	49	14	14	30.2	6.41	1.65	Quantitation summary for protein	129/126	0.957	50	1.055	*	130/126	1.022	46	1.055	*	131/126	0.999	50	1.04		129/127	0.785	50	[1.115]		130/127	0.736	45	1.132	*	131/127	0.852	50	[1.136]		129/128	0.826	50	[1.073]		130/128	0.87
403	gi|397529551	ras-related protein Rab-1A [Gallus gallus]	1354	27046	61	45	18	12	80.5	5.93	10.45	Quantitation summary for protein	129/126	0.94	37	1.052	*	130/126	1.185	37	1.05	*	131/126	1.188	37	[1.051]		129/127	1.837	36	[1.198]		130/127	2.273	36	[1.230]		131/127	2.428	36	[1.230]		129/128	1.141	37	1.063	*	130/128	1.419
404	gi|62888	decorin [Gallus gallus]	1353	46248	53	46	12	11	37.8	8.71	3.25	Quantitation summary for protein	129/126	1.631	47	1.047	*	130/126	1.248	47	1.045	*	131/126	1.223	47	[1.034]		129/127	1.257	47	[1.123]		130/127	0.94	47	[1.115]		131/127	0.981	47	[1.130]		129/128	1.308	47	1.064	*	130/128	0.987
405	gi|298231107	integrin beta-1 precursor [Gallus gallus]	1353	104930	72	63	23	21	23.4	5.14	1.44	Quantitation summary for protein	129/126	0.926	68	1.049	*	130/126	0.848	67	1.049	*	131/126	0.839	68	1.036	*	129/127	0.654	68	1.134	*	130/127	0.584	67	1.169	*	131/127	0.616	68	1.165	*	129/128	0.708	68	[1.056]		130/128	0.639
406	gi|196049781	Chain G, Chicken Cytochrome Bc1 Complex Inhibited By An Iodinated Analogue Of The Polyketide Crocacin-d	1353	10398	89	75	9	7	95.1	9.6	172.53	Quantitation summary for protein	129/126	0.757	80	[1.073]		130/126	1.201	78	[1.111]		131/126	0.648	81	1.069	*	129/127	0.465	81	[1.136]		130/127	0.718	78	[1.155]		131/127	0.412	81	[1.140]		129/128	0.559	80	[1.068]		130/128	0.874
407	gi|33340031	collapsin response mediator protein-4B [Gallus gallus]	1352	69532	57	51	13	13	24.4	6.25	1.4	Quantitation summary for protein	129/126	1.126	25	1.067	*	130/126	1.014	24	[1.052]		131/126	1.056	25	1.065	*	129/127	0.783	25	1.103	*	130/127	0.746	24	1.156	*	131/127	0.764	25	[1.199]		129/128	0.933	25	1.068	*	130/128	0.877
408	gi|63634	unnamed protein product [Gallus gallus]	1352	277045	62	53	25	19	13.6	5.5	0.37	Quantitation summary for protein	129/126	0.778	12	[1.140]		130/126	0.706	12	1.147	*	131/126	0.702	11	1.065	*	129/127	0.739	12	[1.103]		130/127	0.655	12	1.091	*	131/127	0.7	12	[1.222]		129/128	1.389	12	1.154	*	130/128	1.243
409	gi|336176078	neural cell adhesion molecule 1 precursor [Gallus gallus]	1341	109482	61	45	22	17	29.7	4.91	1.35	Quantitation summary for protein	129/126	1.115	55	[1.046]		130/126	1.202	54	1.054	*	131/126	0.984	55	[1.037]		129/127	0.983	55	1.122		130/127	1.069	54	1.148	*	131/127	0.901	55	[1.136]		129/128	0.66	55	[1.059]		130/128	0.705
410	gi|132626770	heterogeneous nuclear ribonucleoprotein R [Gallus gallus]	1341	81574	55	47	19	16	32.4	8.4	1.48	Quantitation summary for protein	129/126	0.898	42	[1.050]		130/126	0.961	41	1.028	*	131/126	1.214	42	1.029	*	129/127	1.228	42	[1.122]		130/127	1.284	42	[1.156]		131/127	1.728	42	[1.173]		129/128	1.165	42	[1.081]		130/128	1.229
411	gi|53136666	hypothetical protein RCJMB04_32c11 [Gallus gallus]	1336	30604	74	64	14	12	59	4.63	7.7	Quantitation summary for protein	129/126	0.888	44	1.084	*	130/126	0.861	43	1.067	*	131/126	1.239	44	1.05	*	129/127	0.777	43	[1.267]		130/127	0.736	42	[1.302]		131/127	1.127	43	[1.354]		129/128	1.1	44	[1.164]		130/128	1.052
412	gi|1531769	rab5C-like protein [Gallus gallus]	1336	26975	35	35	7	7	48.6	8.64	2.21	Quantitation summary for protein	129/126	0.772	17	[1.087]		130/126	1.05	17	1.049	*	131/126	0.879	17	1.048	*	129/127	0.684	17	1.07	*	130/127	0.909	17	[1.058]		131/127	0.809	17	[1.061]		129/128	0.493	17	[1.117]		130/128	0.661
413	gi|53135290	hypothetical protein RCJMB04_24m10 [Gallus gallus]	1326	48868	58	54	15	13	46.6	5.29	1.84	Quantitation summary for protein	129/126	0.768	57	[1.027]		130/126	0.924	56	1.023	*	131/126	0.982	57	[1.023]		129/127	0.99	57	[1.071]		130/127	1.167	56	[1.074]		131/127	1.316	57	[1.088]		129/128	0.868	57	[1.052]		130/128	1.031
414	gi|363740917	PREDICTED: 39S ribosomal protein L12, mitochondrial [Gallus gallus]	1321	25254	59	53	10	10	56.2	9.66	8.31	Quantitation summary for protein	129/126	0.729	57	[1.095]		130/126	0.842	55	[1.086]		131/126	1.012	58	[1.055]		129/127	0.322	57	[1.275]		130/127	0.386	55	[1.259]		131/127	0.467	57	[1.299]		129/128	0.637	57	[1.132]		130/128	0.737
415	gi|63518	unnamed protein product [Gallus gallus]	1321	34052	49	46	9	8	37.5	5.98	1.31	Quantitation summary for protein	129/126	0.733	46	1.059	*	130/126	0.877	46	[1.050]		131/126	0.842	46	[1.058]		129/127	1.208	46	1.115	*	130/127	1.412	46	[1.152]		131/127	1.443	46	[1.171]		129/128	1.005	46	[1.075]		130/128	1.186
416	gi|3822553	nuclear calmodulin-binding protein [Gallus gallus]	1316	92031	63	56	20	19	24.8	4.68	1.24	Quantitation summary for protein	129/126	1.058	27	1.052	*	130/126	0.94	26	1.046	*	131/126	1.027	29	1.043	*	129/127	0.543	28	1.145	*	130/127	0.467	27	1.213	*	131/127	0.55	29	1.207	*	129/128	0.919	28	1.084	*	130/128	0.797
417	gi|53133756	hypothetical protein RCJMB04_20b9 [Gallus gallus]	1315	218646	66	53	29	22	18.7	7.86	0.49	Quantitation summary for protein	129/126	1.548	56	1.043	*	130/126	1.3	56	[1.038]		131/126	1.561	56	1.029	*	129/127	2.121	56	1.096	*	130/127	1.741	56	1.094	*	131/127	2.226	56	[1.106]		129/128	2.272	56	1.089	*	130/128	1.882
418	gi|63778	ribosomal protein L7a [Gallus gallus]	1310	39376	59	55	13	13	41	10.51	3.27	Quantitation summary for protein	129/126	1.243	56	1.054	*	130/126	1.036	57	1.053	*	131/126	1.148	57	[1.047]		129/127	0.679	57	[1.098]		130/127	0.553	57	1.131	*	131/127	0.653	57	[1.136]		129/128	1.007	57	[1.057]		130/128	0.828
419	gi|1399943	26S ATPase complex subunit 4 [Gallus gallus]	1307	59885	55	46	14	12	34.1	5.87	1.62	Quantitation summary for protein	129/126	1.212	50	[1.063]		130/126	1.068	47	1.048	*	131/126	1.294	50	[1.054]		129/127	1.047	51	[1.153]		130/127	0.921	47	[1.169]		131/127	1.163	51	[1.217]		129/128	1.096	51	[1.085]		130/128	0.964
420	gi|53133620	hypothetical protein RCJMB04_18k11 [Gallus gallus]	1307	29887	76	53	19	15	67	5.72	18.26	Quantitation summary for protein	129/126	0.742	66	[1.140]		130/126	0.774	65	1.099	*	131/126	0.743	66	[1.095]		129/127	0.859	65	[1.441]		130/127	0.878	65	[1.531]		131/127	0.895	65	[1.590]		129/128	0.712	66	[1.196]		130/128	0.733
421	gi|53133330	hypothetical protein RCJMB04_15i13 [Gallus gallus]	1306	63568	70	61	12	12	27.7	8.38	1.88	Quantitation summary for protein	129/126	1.137	63	1.042	*	130/126	1.337	63	[1.076]		131/126	1.065	63	1.042	*	129/127	0.726	63	[1.131]		130/127	0.835	63	[1.145]		131/127	0.708	63	[1.137]		129/128	0.647	63	[1.071]		130/128	0.751
422	gi|1922282	vitronectin [Gallus gallus]	1305	56470	47	42	11	8	23	5.17	1.21	Quantitation summary for protein	129/126	0.516	42	1.114	*	130/126	0.843	42	1.08	*	131/126	0.696	42	1.11	*	129/127	1.406	42	[1.277]		130/127	2.247	42	[1.368]		131/127	1.975	42	[1.354]		129/128	1.264	42	[1.165]		130/128	2.037
423	gi|547653	RecName: Full=Hydroxymethylglutaryl-CoA lyase, mitochondrial; Short=HL; Short=HMG-CoA lyase; AltName: Full=3-hydroxy-3-methylglutarate-CoA lyase	1303	35539	46	36	13	11	45.6	7.07	4.45	Quantitation summary for protein	129/126	1.059	43	[1.054]		130/126	1.027	43	1.049	*	131/126	1.051	43	1.047	*	129/127	1.043	43	[1.208]		130/127	0.988	43	[1.228]		131/127	1.077	43	[1.242]		129/128	0.977	43	[1.142]		130/128	0.934
424	gi|50757498	PREDICTED: 60S ribosomal protein L12 [Gallus gallus]	1300	21564	32	30	8	7	54.5	9.48	3.26	Quantitation summary for protein	129/126	1.087	30	[1.056]		130/126	1.062	30	1.051	*	131/126	1.305	29	1.024	*	129/127	0.853	30	[1.184]		130/127	0.814	30	[1.196]		131/127	1.061	30	[1.218]		129/128	1.207	30	[1.095]		130/128	1.163
425	gi|33302289	RecName: Full=Fatty acid-binding protein, smooth muscle; AltName: Full=SM-FABP	1296	9573	44	41	5	5	64.8	5.17	21.37	Quantitation summary for protein	129/126	0.378	4	1.096	*	130/126	0.824	4	1.07	*	131/126	1.094	4	1.049	*	129/127	0.84	4	1.207		130/127	1.787	4	1.213	*	131/127	2.527	4	1.23	*	129/128	0.954	4	1.068		130/128	2.047
426	gi|8163560	vacuolar H-ATPase B subunit osteoclast isozyme, partial [Gallus gallus]	1291	60399	46	42	17	15	38.9	5.5	1.74	Quantitation summary for protein	129/126	1.137	42	[1.066]		130/126	1.072	42	1.086	*	131/126	1.16	42	[1.074]		129/127	1.009	42	[1.272]		130/127	0.93	42	[1.248]		131/127	1.072	42	[1.296]		129/128	1.185	42	[1.127]		130/128	1.102
427	gi|118082637	PREDICTED: NADH dehydrogenase [ubiquinone] 1 alpha subcomplex subunit 6 [Gallus gallus]	1289	16908	83	68	6	5	44.3	9.81	17.62	Quantitation summary for protein	129/126	0.813	74	[1.055]		130/126	0.822	72	1.046	*	131/126	0.617	74	[1.058]		129/127	0.528	74	1.083	*	130/127	0.52	72	1.14	*	131/127	0.416	74	1.146	*	129/128	0.447	74	[1.086]		130/128	0.444
428	gi|136036	RecName: Full=Troponin C, slow skeletal and cardiac muscles; Short=TN-C	1286	21741	55	46	9	9	57.1	4.05	16.6	Quantitation summary for protein	129/126	0.304	48	1.177	*	130/126	0.483	48	1.098	*	131/126	0.939	48	[1.077]		129/127	1.362	48	1.16	*	130/127	2.115	48	1.249	*	131/127	4.38	48	1.29	*	129/128	0.63	48	1.177	*	130/128	0.988
429	gi|53133820	hypothetical protein RCJMB04_20k5 [Gallus gallus]	1284	68091	57	47	22	18	42.6	6.36	2.57	Quantitation summary for protein	129/126	1.041	51	1.062	*	130/126	0.944	50	1.054	*	131/126	1.141	51	1.054	*	129/127	1.131	51	[1.313]		130/127	1.007	50	[1.303]		131/127	1.29	51	[1.307]		129/128	1.194	51	[1.153]		130/128	1.068
430	gi|60098595	hypothetical protein RCJMB04_3o14 [Gallus gallus]	1282	68350	52	41	14	11	25.9	5.07	1.12	Quantitation summary for protein	129/126	1.142	27	1.039	*	130/126	1.073	28	[1.099]		131/126	1.11	28	[1.071]		129/127	1.038	28	[1.114]		130/127	0.955	28	1.155		131/127	1.051	28	1.148		129/128	1.118	28	1.047	*	130/128	1.038
431	gi|363746976	PREDICTED: T-complex protein 1 subunit gamma [Gallus gallus]	1278	18807	39	39	6	6	54.3	6.43	5.16	Quantitation summary for protein	129/126	1.069	39	[1.065]		130/126	1.106	30	[1.068]		131/126	1.089	39	[1.056]		129/127	0.87	39	[1.110]		130/127	0.873	30	[1.171]		131/127	0.922	39	[1.122]		129/128	1.252	39	1.07	*	130/128	1.275
432	gi|53136628	hypothetical protein RCJMB04_31o2 [Gallus gallus]	1274	48208	98	72	19	17	40.2	9.4	6.29	Quantitation summary for protein	129/126	0.923	77	1.119	*	130/126	1.183	76	1.069	*	131/126	0.814	78	1.064	*	129/127	0.659	77	[1.247]		130/127	0.825	76	[1.335]		131/127	0.607	78	[1.344]		129/128	0.646	77	[1.156]		130/128	0.817
433	gi|53133304	hypothetical protein RCJMB04_15e3 [Gallus gallus]	1273	23993	72	61	8	7	47.1	7.9	6.09	Quantitation summary for protein	129/126	0.871	68	[1.058]		130/126	1.023	63	[1.057]		131/126	0.778	69	1.041	*	129/127	0.905	68	[1.109]		130/127	1.05	63	[1.134]		131/127	0.839	69	[1.126]		129/128	0.772	68	1.071	*	130/128	0.888
434	gi|60098739	hypothetical protein RCJMB04_7j8 [Gallus gallus]	1270	117930	51	40	20	17	22.3	6.63	0.68	Quantitation summary for protein	129/126	1.422	49	[1.031]		130/126	1.34	49	[1.041]		131/126	1.302	49	[1.023]		129/127	1.243	49	1.08	*	130/127	1.145	49	1.077	*	131/127	1.183	49	1.084	*	129/128	1.658	49	1.059	*	130/128	1.541
435	gi|517091	transrationally controlled tumor protein [Gallus gallus]	1266	23126	39	33	7	6	39.5	4.9	3.44	Quantitation summary for protein	129/126	0.947	37	1.079	*	130/126	0.897	37	1.045	*	131/126	0.986	37	[1.091]		129/127	1.426	36	1.23	*	130/127	1.321	36	1.22	*	131/127	1.542	36	1.269	*	129/128	0.751	37	[1.264]		130/128	0.701
436	gi|363744316	PREDICTED: histidine triad nucleotide-binding protein 2, mitochondrial-like [Gallus gallus]	1259	17993	31	30	7	6	54.4	9.56	6.88	Quantitation summary for protein	129/126	0.928	30	1.062	*	130/126	1.079	29	1.09	*	131/126	1.001	30	1.053		129/127	0.845	30	1.24	*	130/127	0.965	29	1.246		131/127	0.948	30	1.261		129/128	0.837	30	1.084	*	130/128	0.962
437	gi|63434	unnamed protein product [Gallus gallus]	1259	18955	43	41	7	6	46	10.27	6.1	Quantitation summary for protein	129/126	0.625	28	[1.089]		130/126	0.552	26	1.124	*	131/126	0.607	28	[1.074]		129/127	0.508	28	[1.093]		130/127	0.45	26	1.067	*	131/127	0.513	28	[1.105]		129/128	0.746	28	[1.097]		130/128	0.655
438	gi|363739542	PREDICTED: eukaryotic translation initiation factor 3 subunit B-like [Gallus gallus]	1256	95699	54	47	18	15	30.4	5.12	0.9	Quantitation summary for protein	129/126	1.03	51	[1.046]		130/126	1	51	1.046		131/126	1.235	51	1.028	*	129/127	1.556	51	1.113	*	130/127	1.477	51	1.129	*	131/127	1.941	51	1.135	*	129/128	1.514	51	1.07	*	130/128	1.45
439	gi|50754381	PREDICTED: ras-related protein Rab-7a isoform 2 [Gallus gallus]	1253	27943	46	41	10	9	49.3	6.4	4.41	Quantitation summary for protein	129/126	1.06	44	[1.080]		130/126	1.141	43	1.061	*	131/126	1.131	44	1.043	*	129/127	1.386	43	1.186	*	130/127	1.458	43	[1.246]		131/127	1.539	43	1.238	*	129/128	0.941	44	[1.113]		130/128	0.999
440	gi|363738749	PREDICTED: cullin-associated NEDD8-dissociated protein 1 isoform 2 [Gallus gallus]	1252	159560	55	43	22	18	18.3	5.88	0.59	Quantitation summary for protein	129/126	1.547	33	[1.044]		130/126	1.358	33	[1.051]		131/126	1.27	33	[1.031]		129/127	1.716	33	[1.149]		130/127	1.473	33	[1.163]		131/127	1.465	33	1.148	*	129/128	1.834	33	[1.090]		130/128	1.588
441	gi|363742669	PREDICTED: hepatoma-derived growth factor [Gallus gallus]	1249	34653	78	59	18	16	63.4	5.1	6.48	Quantitation summary for protein	129/126	0.618	62	[1.070]		130/126	0.806	62	1.076	*	131/126	0.821	62	[1.045]		129/127	1.02	62	[1.159]		130/127	1.301	62	[1.122]		131/127	1.409	62	[1.178]		129/128	0.697	62	1.151	*	130/128	0.896
442	gi|363737203	PREDICTED: eukaryotic translation initiation factor 4 gamma 1 [Gallus gallus]	1245	206662	73	43	27	20	18	5.24	0.5	Quantitation summary for protein	129/126	1.312	36	[1.066]		130/126	1.194	34	1.045	*	131/126	1.335	36	[1.041]		129/127	0.969	36	1.143		130/127	0.868	34	1.155	*	131/127	1.026	36	1.212		129/128	1.491	36	1.084	*	130/128	1.416
443	gi|363732267	PREDICTED: LOW QUALITY PROTEIN: erythrocyte membrane protein band 4.1-like 2 [Gallus gallus]	1244	157355	68	51	26	21	22.1	4.98	0.71	Quantitation summary for protein	129/126	0.893	50	1.05	*	130/126	0.801	50	1.033	*	131/126	0.873	50	1.032	*	129/127	1.123	50	1.156	*	130/127	0.984	50	1.196		131/127	1.141	50	1.208	*	129/128	1.317	50	[1.091]		130/128	1.165
444	gi|664925	GTP-binding protein [Gallus gallus]	1243	26657	38	31	8	6	42	5.98	4.22	Quantitation summary for protein	129/126	0.969	37	[1.087]		130/126	1.081	37	[1.108]		131/126	0.961	37	1.041	*	129/127	1.163	36	[1.243]		130/127	1.249	36	[1.260]		131/127	1.194	36	[1.259]		129/128	0.778	37	[1.152]		130/128	0.857
445	gi|363736976	PREDICTED: protein phosphatase 1 regulatory subunit 7 [Gallus gallus]	1239	45915	54	43	19	17	53.6	4.88	4.66	Quantitation summary for protein	129/126	0.853	53	[1.035]		130/126	1.004	53	1.037		131/126	0.885	53	1.032	*	129/127	1.109	53	[1.110]		130/127	1.276	53	[1.133]		131/127	1.197	53	[1.132]		129/128	0.841	53	[1.059]		130/128	0.976
446	gi|60098985	hypothetical protein RCJMB04_18a15 [Gallus gallus]	1239	73641	42	38	14	12	29.6	8.18	0.92	Quantitation summary for protein	129/126	1.081	39	[1.043]		130/126	0.938	39	1.045	*	131/126	0.955	38	1.021	*	129/127	0.831	39	[1.111]		130/127	0.704	39	1.107	*	131/127	0.761	39	[1.105]		129/128	1.359	38	1.064	*	130/128	1.109
447	gi|212294	MHC B complex protein 12.3 [Gallus gallus]	1225	39636	45	38	12	9	36.3	7.6	1.84	Quantitation summary for protein	129/126	1.138	40	1.057	*	130/126	1.152	37	1.061	*	131/126	1.445	40	1.06	*	129/127	1.673	40	1.171	*	130/127	1.658	38	1.152	*	131/127	2.21	40	1.184	*	129/128	1.498	40	1.095	*	130/128	1.496
448	gi|53133536	hypothetical protein RCJMB04_17k12 [Gallus gallus]	1224	77928	53	46	17	15	27.9	6.48	1.38	Quantitation summary for protein	129/126	1.236	46	1.034	*	130/126	1.18	44	1.033	*	131/126	1.332	46	[1.044]		129/127	1.879	48	[1.163]		130/127	1.774	45	1.137	*	131/127	2.106	48	[1.186]		129/128	1.453	48	[1.055]		130/128	1.372
449	gi|60098479	hypothetical protein RCJMB04_2l20 [Gallus gallus]	1224	73227	45	39	12	8	19	7.46	0.55	Quantitation summary for protein	129/126	1.007	39	[1.072]		130/126	0.85	38	1.082	*	131/126	1.063	39	1.053	*	129/127	0.67	39	[1.382]		130/127	0.579	38	[1.411]		131/127	0.736	39	[1.474]		129/128	1.151	39	1.255	*	130/128	0.976
450	gi|363728304	PREDICTED: alpha-2-macroglobulin [Gallus gallus]	1223	189101	60	51	28	22	21	6.09	0.61	Quantitation summary for protein	129/126	0.768	56	1.052	*	130/126	0.991	54	1.032	*	131/126	0.553	56	[1.047]		129/127	1.022	56	[1.103]		130/127	1.286	55	[1.131]		131/127	0.765	56	1.124	*	129/128	0.633	56	1.079	*	130/128	0.805
451	gi|50758290	PREDICTED: uncharacterized protein LOC417605 isoform 2 [Gallus gallus]	1221	15618	26	25	4	3	32.3	8.04	2.25	Quantitation summary for protein	129/126	0.644	25	1.073	*	130/126	1.315	25	[1.211]		131/126	0.79	25	1.05	*	129/127	1.179	25	1.263	*	130/127	2.355	25	[1.383]		131/127	1.505	25	1.31	*	129/128	0.967	25	[1.137]		130/128	1.95
452	gi|363746072	PREDICTED: neuroblast differentiation-associated protein AHNAK-like [Gallus gallus]	1218	62404	45	39	14	10	29.3	8.36	1.27	Quantitation summary for protein	129/126	0.974	41	1.057	*	130/126	0.829	39	1.055	*	131/126	1.059	41	1.034	*	129/127	1.645	42	1.218	*	130/127	1.382	40	[1.181]		131/127	1.86	42	[1.246]		129/128	1.514	41	1.119	*	130/128	1.273
453	gi|363735591	PREDICTED: eukaryotic translation initiation factor 3 subunit A [Gallus gallus]	1217	185080	73	63	27	24	20.2	6.74	0.63	Quantitation summary for protein	129/126	1.159	68	1.026	*	130/126	1.291	68	1.044	*	131/126	1.135	68	[1.023]		129/127	1.036	68	[1.059]		130/127	1.129	68	1.075	*	131/127	1.056	68	1.071	*	129/128	1.264	68	1.04	*	130/128	1.39
454	gi|118101125	PREDICTED: aflatoxin B1 aldehyde reductase member 4 [Gallus gallus]	1215	40839	43	39	14	14	45.1	6.76	3.74	Quantitation summary for protein	129/126	1.167	40	[1.071]		130/126	1.193	39	[1.090]		131/126	1.096	40	[1.067]		129/127	0.891	41	1.213	*	130/127	0.891	39	[1.269]		131/127	0.871	41	[1.264]		129/128	0.855	41	[1.203]		130/128	0.863
455	gi|60098639	hypothetical protein RCJMB04_4d23 [Gallus gallus]	1213	54720	40	39	14	14	38.1	5.83	1.7	Quantitation summary for protein	129/126	1.308	40	1.035	*	130/126	1.14	40	[1.041]		131/126	1.287	40	1.033	*	129/127	1.321	40	1.089	*	130/127	1.126	40	1.116	*	131/127	1.353	40	1.124	*	129/128	1.216	40	[1.055]		130/128	1.046
456	gi|62972	proteasome C1 subunit [Gallus gallus]	1209	23565	33	29	7	6	47.1	9	2.78	Quantitation summary for protein	129/126	0.877	31	[1.076]		130/126	0.926	31	[1.074]		131/126	1.037	31	1.036	*	129/127	1.08	31	[1.202]		130/127	1.114	31	[1.233]		131/127	1.328	31	[1.270]		129/128	0.852	31	[1.086]		130/128	0.887
457	gi|53133788	hypothetical protein RCJMB04_20e18 [Gallus gallus]	1203	113465	64	49	23	19	29.1	6.03	0.87	Quantitation summary for protein	129/126	1.321	56	1.038	*	130/126	1.151	56	[1.032]		131/126	1.206	56	1.025	*	129/127	2.067	56	[1.122]		130/127	1.76	56	[1.111]		131/127	1.963	56	1.114	*	129/128	1.917	56	1.07	*	130/128	1.648
458	gi|53126513	hypothetical protein RCJMB04_1d23 [Gallus gallus]	1201	28358	53	39	12	11	54.9	5.22	6.41	Quantitation summary for protein	129/126	0.693	45	[1.100]		130/126	0.793	43	1.099	*	131/126	0.778	45	1.082	*	129/127	0.923	44	[1.295]		130/127	1.033	43	1.318		131/127	1.106	43	1.261	*	129/128	0.698	45	[1.141]		130/128	0.789
459	gi|53127216	hypothetical protein RCJMB04_1j22 [Gallus gallus]	1201	67383	60	49	22	18	41.7	8.09	1.59	Quantitation summary for protein	129/126	0.993	53	1.055		130/126	1.125	53	1.044	*	131/126	1.062	53	1.038	*	129/127	1.198	53	1.13	*	130/127	1.326	53	1.196	*	131/127	1.332	53	1.2	*	129/128	1.058	53	1.072	*	130/128	1.182
460	gi|53130732	hypothetical protein RCJMB04_9m1 [Gallus gallus]	1199	78414	62	52	25	21	42	5.89	2.42	Quantitation summary for protein	129/126	0.949	58	[1.040]		130/126	0.93	58	[1.046]		131/126	1.108	57	1.027	*	129/127	1.553	58	[1.134]		130/127	1.487	58	1.147	*	131/127	1.885	58	[1.152]		129/128	1.425	58	[1.091]		130/128	1.377
461	gi|363729456	PREDICTED: uncharacterized protein KIAA0564-like [Gallus gallus]	1198	239076	57	48	28	24	17.2	6.64	0.46	Quantitation summary for protein	129/126	1.275	51	[1.046]		130/126	1.196	49	[1.046]		131/126	1.079	51	[1.047]		129/127	1.478	51	1.106	*	130/127	1.36	49	1.119	*	131/127	1.3	51	1.116	*	129/128	1.782	51	1.077	*	130/128	1.649
462	gi|60098921	hypothetical protein RCJMB04_15g18 [Gallus gallus]	1196	54957	68	53	20	18	35.1	4.82	3.28	Quantitation summary for protein	129/126	---	1	---		130/126	---	1	---		131/126	---	1	---		129/127	---	1	---		130/127	---	1	---		131/127	---	1	---		129/128	---	1	---		130/128	---
463	gi|118092131	PREDICTED: alpha-1-antichymotrypsin [Gallus gallus]	1194	54652	40	35	10	9	28.4	5.7	0.9	Quantitation summary for protein	129/126	1.952	38	1.085	*	130/126	2.728	38	1.111	*	131/126	2.155	38	[1.086]		129/127	2.779	38	1.182	*	130/127	3.797	38	1.202	*	131/127	3.191	38	1.185	*	129/128	2.526	38	1.116	*	130/128	3.483
464	gi|363737678	PREDICTED: IQ motif containing GTPase activating protein 1 [Gallus gallus]	1190	231218	51	42	25	20	15.6	6.22	0.38	Quantitation summary for protein	129/126	1.116	48	1.035	*	130/126	1.107	44	1.031	*	131/126	1.067	48	[1.034]		129/127	1.447	48	1.098	*	130/127	1.413	44	1.114	*	131/127	1.44	48	1.128	*	129/128	1.413	47	1.072	*	130/128	1.383
465	gi|50730512	PREDICTED: ADP-ribosylhydrolase like 1 [Gallus gallus]	1189	46035	57	46	16	14	40.4	5.55	2.24	Quantitation summary for protein	129/126	1.12	46	[1.088]		130/126	1.014	46	1.048		131/126	1.072	46	[1.049]		129/127	1.63	47	1.134	*	130/127	1.445	46	1.166	*	131/127	1.612	47	1.19	*	129/128	1.542	46	1.129	*	130/128	1.377
466	gi|53131814	hypothetical protein RCJMB04_12d24 [Gallus gallus]	1187	77735	38	32	14	11	25.9	5.26	0.86	Quantitation summary for protein	129/126	1.086	32	[1.124]		130/126	1.093	24	1.082	*	131/126	1.096	31	1.088	*	129/127	0.847	32	[1.367]		130/127	0.868	24	1.353	*	131/127	0.875	32	1.416	*	129/128	0.866	30	1.182	*	130/128	0.879
467	gi|53133870	hypothetical protein RCJMB04_21f9 [Gallus gallus]	1185	55700	52	42	18	14	44.6	7.12	2.74	Quantitation summary for protein	129/126	1.135	45	1.055	*	130/126	1.11	44	1.048	*	131/126	1.202	45	[1.043]		129/127	1.132	45	1.108	*	130/127	1.084	44	[1.120]		131/127	1.247	45	1.135	*	129/128	1.236	45	1.073	*	130/128	1.191
468	gi|53136762	hypothetical protein RCJMB04_33h20 [Gallus gallus]	1183	38970	32	27	9	8	39.9	7.72	1.89	Quantitation summary for protein	129/126	0.888	28	[1.038]		130/126	0.88	27	1.079	*	131/126	0.947	28	1.042	*	129/127	0.79	28	[1.116]		130/127	0.764	27	1.138	*	131/127	0.876	28	[1.157]		129/128	0.842	27	1.048	*	130/128	0.868
469	gi|4218983	GTP-binding protein [Gallus gallus]	1183	26426	42	32	9	6	42.5	6.2	2.29	Quantitation summary for protein	129/126	1.377	2	1.346		130/126	1.061	2	1.233		131/126	1.19	2	1.13		129/127	0.894	2	1.345		130/127	0.673	2	1.231		131/127	0.804	2	1.129		129/128	0.897	2	1.346		130/128	0.681
470	gi|363742450	PREDICTED: isobutyryl-CoA dehydrogenase, mitochondrial [Gallus gallus]	1182	49644	51	45	17	16	48.5	8.73	2.62	Quantitation summary for protein	129/126	1.392	46	1.044	*	130/126	1.021	46	1.037	*	131/126	0.979	46	[1.031]		129/127	1.595	46	1.066	*	130/127	1.143	46	1.08	*	131/127	1.167	46	1.082	*	129/128	1.433	45	1.041	*	130/128	1.033
471	gi|53131091	hypothetical protein RCJMB04_11d4 [Gallus gallus]	1181	116432	62	51	22	19	25.1	5.68	0.84	Quantitation summary for protein	129/126	1.448	55	[1.045]		130/126	1.186	54	1.039	*	131/126	1.39	55	1.037	*	129/127	1.399	55	1.102	*	130/127	1.124	55	1.117	*	131/127	1.397	55	1.115	*	129/128	1.572	55	1.06	*	130/128	1.274
472	gi|228312418	Chain F, Cytochrome Bc1 Complex From Chicken	1180	16339	96	61	15	11	64.5	9.25	62.47	Quantitation summary for protein	129/126	0.634	51	[1.215]		130/126	0.917	49	[1.098]		131/126	0.699	51	1.118	*	129/127	2.47	51	[1.393]		130/127	3.514	49	[1.619]		131/127	2.834	51	[1.606]		129/128	0.914	51	1.187	*	130/128	1.308
473	gi|363738896	PREDICTED: transcriptional activator protein Pur-alpha, partial [Gallus gallus]	1173	34648	44	36	11	9	34.9	6.96	2.28	Quantitation summary for protein	129/126	0.82	41	1.094	*	130/126	0.985	37	[1.111]		131/126	0.827	41	1.097	*	129/127	0.758	41	[1.293]		130/127	0.897	37	[1.323]		131/127	0.795	41	[1.313]		129/128	0.77	41	[1.109]		130/128	0.917
474	gi|268370289	thiosulfate sulfurtransferase [Gallus gallus]	1171	37677	83	57	14	11	36.7	6.8	3.56	Quantitation summary for protein	129/126	1.171	30	[1.058]		130/126	1.098	30	[1.079]		131/126	1.098	30	[1.083]		129/127	0.748	30	[1.142]		130/127	0.686	30	1.189	*	131/127	0.73	30	[1.200]		129/128	0.817	29	1.063	*	130/128	0.76
475	gi|53132964	hypothetical protein RCJMB04_14e22 [Gallus gallus]	1166	59633	58	44	13	11	29.3	10.2	1.93	Quantitation summary for protein	129/126	1.276	54	1.052	*	130/126	1.286	49	[1.087]		131/126	1.405	54	1.053	*	129/127	1.402	55	1.158	*	130/127	1.394	49	1.217	*	131/127	1.604	55	[1.183]		129/128	1.469	55	1.117	*	130/128	1.468
476	gi|57240089	vimentin, partial [Gallus gallus]	1165	20443	53	42	14	12	67.1	8.49	20.05	Quantitation summary for protein	129/126	0.46	3	1.059	*	130/126	0.584	3	1.087	*	131/126	0.586	3	1.04	*	129/127	0.191	3	1.043	*	130/127	0.237	3	1.059	*	131/127	0.253	3	1.028	*	129/128	0.769	3	1.024	*	130/128	0.963
477	gi|50754810	PREDICTED: catenin alpha-1 [Gallus gallus]	1164	117395	40	34	14	13	18.8	5.87	0.6	Quantitation summary for protein	129/126	1.067	32	[1.027]		130/126	0.979	32	1.042	*	131/126	1.157	32	1.021	*	129/127	1.385	32	[1.090]		130/127	1.242	32	[1.111]		131/127	1.562	32	[1.104]		129/128	1.331	32	[1.045]		130/128	1.211
478	gi|118101780	PREDICTED: adenylate kinase 2, mitochondrial [Gallus gallus]	1164	29748	67	54	19	19	64.6	8.39	25.75	Quantitation summary for protein	129/126	0.896	58	1.063	*	130/126	0.821	56	1.095	*	131/126	0.875	58	[1.071]		129/127	0.358	58	[1.404]		130/127	0.318	56	[1.404]		131/127	0.364	58	[1.387]		129/128	0.621	58	1.133	*	130/128	0.559
479	gi|363735036	PREDICTED: nidogen-2 [Gallus gallus]	1162	136907	49	44	16	15	14.3	5.43	0.46	Quantitation summary for protein	129/126	0.761	46	1.049	*	130/126	0.824	45	1.04	*	131/126	0.842	46	1.033	*	129/127	0.62	46	[1.066]		130/127	0.656	45	[1.090]		131/127	0.712	46	[1.091]		129/128	0.782	46	1.048	*	130/128	0.833
480	gi|63807	chicken transferrin receptor [Gallus gallus]	1157	96160	55	47	12	12	18.9	5.88	0.83	Quantitation summary for protein	129/126	1.241	52	[1.063]		130/126	1.389	47	[1.115]		131/126	1.317	52	1.061	*	129/127	1.36	52	1.136	*	130/127	1.49	47	1.174	*	131/127	1.501	52	1.156	*	129/128	1.235	52	[1.072]		130/128	1.363
481	gi|50755563	PREDICTED: 28 kDa heat- and acid-stable phosphoprotein [Gallus gallus]	1156	27004	54	42	15	10	60.6	7.79	7.15	Quantitation summary for protein	129/126	0.652	46	1.087	*	130/126	0.729	46	1.083	*	131/126	0.818	46	1.067	*	129/127	0.708	46	[1.436]		130/127	0.775	46	[1.433]		131/127	0.925	46	[1.486]		129/128	0.77	46	[1.218]		130/128	0.85
482	gi|363741087	PREDICTED: protein unc-45 homolog B [Gallus gallus]	1154	125128	51	45	18	15	17.6	8.13	0.63	Quantitation summary for protein	129/126	1.481	47	1.033	*	130/126	1.131	47	[1.033]		131/126	1.365	46	1.028	*	129/127	1.389	47	[1.122]		130/127	1.038	47	[1.119]		131/127	1.33	47	[1.137]		129/128	2.082	47	[1.079]		130/128	1.569
483	gi|313661476	spectrin beta chain, brain 1 [Gallus gallus]	1154	317822	71	55	36	30	15.7	5.37	0.46	Quantitation summary for protein	129/126	1.136	61	1.025	*	130/126	1.002	60	[1.055]		131/126	1.056	62	[1.026]		129/127	1.008	62	[1.140]		130/127	0.875	60	[1.141]		131/127	0.981	62	[1.150]		129/128	1.355	62	1.08	*	130/128	1.186
484	gi|1478490	acyl-coenzyme A binding protein, ACBP [chickens, Peptide, 86 aa]	1149	12847	78	55	8	7	79.1	5.8	54.01	Quantitation summary for protein	129/126	0.752	23	[1.157]		130/126	1.136	23	1.064	*	131/126	0.969	23	[1.174]		129/127	2.76	23	[1.396]		130/127	4.076	23	[1.399]		131/127	3.702	23	[1.450]		129/128	1.13	23	[1.423]		130/128	1.684
485	gi|3184514	GTPase cRhoA [Gallus gallus]	1149	26235	42	33	9	6	42.5	5.83	1.94	Quantitation summary for protein	129/126	1.056	2	1.089		130/126	1.29	2	1.055		131/126	1.561	2	1.126		129/127	1.056	2	1.079		130/127	1.261	2	1.045		131/127	1.623	2	1.114		129/128	0.981	2	1.055		130/128	1.182
486	gi|53133360	hypothetical protein RCJMB04_15n8 [Gallus gallus]	1148	62658	46	38	17	15	43	5.52	1.93	Quantitation summary for protein	129/126	0.915	44	1.034	*	130/126	0.915	43	1.033	*	131/126	1.053	43	1.029	*	129/127	1.058	44	[1.104]		130/127	1.045	44	[1.129]		131/127	1.272	44	[1.140]		129/128	1.053	44	1.072	*	130/128	1.05
487	gi|60098675	hypothetical protein RCJMB04_5e12 [Gallus gallus]	1147	32509	70	64	13	13	40.5	4.84	11.53	Quantitation summary for protein	129/126	0.823	19	1.086	*	130/126	0.936	19	1.119	*	131/126	1.007	18	1.041		129/127	1.066	19	[1.601]		130/127	1.185	19	[1.586]		131/127	1.359	19	[1.632]		129/128	1.061	19	[1.239]		130/128	1.189
488	gi|2558539	ubiquitin-ribosomal protein fusion protein [Gallus gallus]	1146	19140	104	63	9	8	51.6	9.87	6.03	Quantitation summary for protein	129/126	0.803	14	1.049	*	130/126	0.907	14	1.047	*	131/126	0.941	14	1.065	*	129/127	0.946	14	[1.462]		130/127	1.045	14	1.465		131/127	1.154	14	[1.528]		129/128	1.033	14	[1.118]		130/128	1.151
489	gi|50764028	PREDICTED: aldo-keto reductase family 1 member B10 [Gallus gallus]	1142	42291	60	48	12	11	35.1	6.8	2.87	Quantitation summary for protein	129/126	---	1	---		130/126	---	1	---		131/126	---	1	---		129/127	---	1	---		130/127	---	1	---		131/127	---	1	---		129/128	---	1	---		130/128	---
490	gi|363730968	PREDICTED: hydroxyacid-oxoacid transhydrogenase, mitochondrial [Gallus gallus]	1141	55187	48	45	11	11	39.9	6.8	1.53	Quantitation summary for protein	129/126	0.936	47	1.03	*	130/126	0.856	47	1.051	*	131/126	0.927	47	1.031	*	129/127	1.145	45	[1.120]		130/127	1.027	45	[1.118]		131/127	1.179	45	[1.122]		129/128	0.951	47	1.045	*	130/128	0.857
491	gi|50755667	PREDICTED: NADH dehydrogenase [ubiquinone] 1 beta subcomplex subunit 10 [Gallus gallus]	1138	23290	79	54	13	11	38.3	5.98	8.79	Quantitation summary for protein	129/126	0.925	56	[1.061]		130/126	1.007	55	[1.089]		131/126	0.827	56	1.037	*	129/127	0.529	56	[1.263]		130/127	0.563	55	[1.282]		131/127	0.492	56	[1.289]		129/128	0.64	56	[1.176]		130/128	0.687
492	gi|6065857	dynactin [Gallus gallus]	1137	159940	64	48	22	15	19.8	6.15	0.5	Quantitation summary for protein	129/126	1.408	55	[1.039]		130/126	1.245	55	1.031	*	131/126	1.306	55	[1.027]		129/127	1.668	55	[1.089]		130/127	1.442	55	[1.093]		131/127	1.609	55	[1.093]		129/128	1.911	54	1.073	*	130/128	1.68
493	gi|63494	HMG2a [Gallus gallus]	1135	32623	37	33	7	7	25.2	8.18	0.97	Quantitation summary for protein	129/126	0.766	33	1.057	*	130/126	0.84	33	1.088	*	131/126	0.802	33	1.055	*	129/127	0.429	33	[1.295]		130/127	0.46	33	[1.266]		131/127	0.467	33	[1.302]		129/128	0.789	33	[1.151]		130/128	0.853
494	gi|50750473	PREDICTED: kelch repeat and BTB domain-containing protein 10 [Gallus gallus]	1133	81224	45	37	12	10	19.8	5.17	0.88	Quantitation summary for protein	129/126	1.289	40	1.118	*	130/126	1.074	40	1.064	*	131/126	1.325	40	1.071	*	129/127	1.508	39	[1.180]		130/127	1.231	39	[1.234]		131/127	1.607	39	[1.262]		129/128	1.839	39	1.096	*	130/128	1.507
495	gi|118083116	PREDICTED: sorting and assembly machinery component 50 homolog [Gallus gallus]	1128	57514	61	47	17	15	44.8	5.99	2.4	Quantitation summary for protein	129/126	1.031	54	[1.043]		130/126	1.229	52	1.044	*	131/126	1.14	54	1.036	*	129/127	1.346	53	1.106	*	130/127	1.568	52	1.122	*	131/127	1.548	53	1.137	*	129/128	0.964	53	[1.076]		130/128	1.133
496	gi|3136063	20S proteasome subunit C2 [Gallus gallus]	1127	32400	53	42	11	9	44.2	6.08	1.41	Quantitation summary for protein	129/126	0.911	42	[1.079]		130/126	0.954	40	1.047	*	131/126	1.095	42	1.029	*	129/127	0.644	42	[1.214]		130/127	0.879	40	[1.225]		131/127	0.805	42	[1.306]		129/128	0.793	42	[1.134]		130/128	0.97
497	gi|517085	alpha-actinin [Gallus gallus]	1126	117087	46	44	17	17	24.4	5.13	0.83	Quantitation summary for protein	129/126	1.072	30	1.043	*	130/126	0.875	30	[1.052]		131/126	0.922	30	1.021	*	129/127	1.349	30	1.114	*	130/127	1.077	30	[1.153]		131/127	1.208	30	1.137	*	129/128	1.501	30	1.072	*	130/128	1.209
498	gi|50729038	PREDICTED: aldo-keto reductase family 1 member B10 [Gallus gallus]	1123	42618	75	60	20	19	67.4	7.08	7.72	Quantitation summary for protein	129/126	0.943	35	1.06	*	130/126	1.07	34	1.06	*	131/126	1.143	36	[1.048]		129/127	1.236	36	[1.136]		130/127	1.412	34	1.168	*	131/127	1.56	36	[1.171]		129/128	1.127	36	1.08	*	130/128	1.288
499	gi|363739166	PREDICTED: LOW QUALITY PROTEIN: myotilin [Gallus gallus]	1119	95753	45	38	12	8	16.3	8.46	0.55	Quantitation summary for protein	129/126	1.159	37	[1.039]		130/126	0.965	35	1.045	*	131/126	1.264	38	[1.081]		129/127	1.093	38	[1.093]		130/127	0.913	34	1.065	*	131/127	1.282	37	1.086	*	129/128	1.166	38	1.05	*	130/128	0.963
500	gi|363735661	PREDICTED: PDZ and LIM domain protein 1 isoform 4 [Gallus gallus]	1114	52905	48	37	14	11	35	7.22	1.79	Quantitation summary for protein	129/126	0.884	43	1.036	*	130/126	0.845	40	1.04	*	131/126	1.029	43	1.018	*	129/127	0.692	42	1.111	*	130/127	0.647	40	1.125	*	131/127	0.837	41	[1.134]		129/128	1.051	41	1.058	*	130/128	0.992
501	gi|211957	immunoglobulin heavy chain V-region, partial [Gallus gallus]	1109	12393	42	39	9	9	75.7	9.34	22.72	Quantitation summary for protein	129/126	0.772	9	1.105	*	130/126	0.699	9	1.132	*	131/126	0.435	9	1.174	*	129/127	0.321	9	[1.384]		130/127	0.284	9	1.369	*	131/127	0.188	9	[1.308]		129/128	0.418	9	[1.228]		130/128	0.373
502	gi|363738612	PREDICTED: constitutive coactivator of PPAR-gamma-like protein 1-like [Gallus gallus]	1099	137414	32	30	8	8	9.1	9.02	0.26	Quantitation summary for protein	129/126	1.365	31	1.037	*	130/126	1.122	30	1.042	*	131/126	1.188	31	1.03	*	129/127	1.487	31	[1.144]		130/127	1.199	30	[1.118]		131/127	1.346	31	[1.150]		129/128	1.653	30	1.082	*	130/128	1.344
503	gi|118098842	PREDICTED: cytochrome b-c1 complex subunit 9-like [Gallus gallus]	1099	8268	32	26	3	3	45.2	6.84	11.1	Quantitation summary for protein	129/126	0.865	28	1.106	*	130/126	0.994	28	1.1		131/126	0.812	27	1.055	*	129/127	2.141	28	[1.373]		130/127	2.406	28	[1.373]		131/127	2.087	28	[1.400]		129/128	1.068	28	[1.184]		130/128	1.21
504	gi|63389	fibroblast alpha actinin [Gallus gallus]	1095	111303	51	41	17	15	26.1	5.32	0.89	Quantitation summary for protein	129/126	1.028	20	1.053	*	130/126	0.854	20	1.058	*	131/126	1.11	20	1.04	*	129/127	1.29	20	1.164	*	130/127	1.048	20	1.171		131/127	1.449	20	1.175	*	129/128	1.531	20	1.107	*	130/128	1.255
505	gi|211497	calsequestrin, partial [Gallus gallus]	1095	51964	62	52	13	10	32.3	4	2.03	Quantitation summary for protein	129/126	0.91	52	[1.137]		130/126	0.815	51	[1.075]		131/126	0.846	52	1.067	*	129/127	1.858	54	[1.289]		130/127	1.628	52	[1.367]		131/127	1.797	53	[1.402]		129/128	1.159	53	1.207	*	130/128	1.025
506	gi|545981	calponin alpha [chickens, gizzard, Peptide, 292 aa]	1092	37324	38	35	9	9	30.1	9.3	2.29	Quantitation summary for protein	129/126	1.257	27	1.05	*	130/126	1.066	27	[1.064]		131/126	1.823	27	[1.084]		129/127	1.197	27	1.148	*	130/127	0.993	27	[1.142]		131/127	1.806	27	[1.180]		129/128	1.677	27	[1.121]		130/128	1.403
507	gi|211780	fibrinogen beta chain, partial [Gallus gallus]	1092	62209	44	43	14	13	39.7	7.18	1.66	Quantitation summary for protein	129/126	0.631	43	[1.155]		130/126	0.91	43	1.084	*	131/126	0.548	44	1.089	*	129/127	0.765	43	[1.276]		130/127	1.079	43	[1.463]		131/127	0.69	43	[1.408]		129/128	1.079	43	1.177	*	130/128	1.535
508	gi|363729287	PREDICTED: complement C4-like [Gallus gallus]	1089	220857	48	34	22	16	13.4	7.07	0.3	Quantitation summary for protein	129/126	1.213	37	[1.044]		130/126	1.131	37	1.029	*	131/126	0.796	36	1.026	*	129/127	0.827	37	1.123	*	130/127	0.753	37	1.147	*	131/127	0.553	37	1.151	*	129/128	0.815	37	1.058	*	130/128	0.749
509	gi|363733689	PREDICTED: LOW QUALITY PROTEIN: dysferlin, partial [Gallus gallus]	1088	249937	49	43	20	17	12.7	5.47	0.28	Quantitation summary for protein	129/126	1.431	41	1.052	*	130/126	1.145	40	1.05	*	131/126	1.123	41	[1.041]		129/127	1.333	41	[1.151]		130/127	1.044	41	1.138	*	131/127	1.088	41	1.149	*	129/128	1.439	41	1.074	*	130/128	1.137
510	gi|363730012	PREDICTED: NADH dehydrogenase [ubiquinone] 1 alpha subcomplex subunit 4 [Gallus gallus]	1085	11610	83	58	9	9	47.6	9.56	80.19	Quantitation summary for protein	129/126	1.259	71	[1.092]		130/126	1.097	69	1.048	*	131/126	0.989	71	[1.049]		129/127	1.057	71	[1.370]		130/127	0.916	69	[1.429]		131/127	0.863	71	[1.469]		129/128	0.856	71	[1.159]		130/128	0.741
511	gi|356460917	40S ribosomal protein S8 [Gallus gallus]	1085	31788	46	42	10	10	40.4	10.32	3.45	Quantitation summary for protein	129/126	1.531	42	[1.080]		130/126	1.21	42	1.055	*	131/126	1.34	42	[1.045]		129/127	0.942	42	[1.208]		130/127	0.728	42	[1.253]		131/127	0.858	42	[1.255]		129/128	1.408	42	[1.104]		130/128	1.098
512	gi|53136806	hypothetical protein RCJMB04_34c21 [Gallus gallus]	1081	64847	65	53	23	21	44.2	5.02	2.99	Quantitation summary for protein	129/126	0.768	58	1.061	*	130/126	0.797	56	1.042	*	131/126	0.902	58	[1.056]		129/127	1.086	58	[1.133]		130/127	1.108	56	1.146	*	131/127	1.326	58	1.163	*	129/128	1.014	58	1.089		130/128	1.04
513	gi|50752104	PREDICTED: septin-2 [Gallus gallus]	1079	48085	37	35	10	9	34.3	5.91	1.08	Quantitation summary for protein	129/126	0.86	11	1.054	*	130/126	0.863	11	[1.079]		131/126	0.931	11	1.047	*	129/127	1.277	11	1.216	*	130/127	1.254	11	[1.216]		131/127	1.438	11	1.234	*	129/128	1.133	11	1.08	*	130/128	1.122
514	gi|53130274	hypothetical protein RCJMB04_6l6 [Gallus gallus]	1077	34796	40	35	15	12	48.8	5.04	3.3	Quantitation summary for protein	129/126	0.83	32	1.086	*	130/126	0.867	31	[1.073]		131/126	1.087	32	1.055	*	129/127	1.161	32	[1.184]		130/127	1.204	31	[1.292]		131/127	1.581	32	[1.288]		129/128	1.307	32	1.09	*	130/128	1.365
515	gi|10505269	integrin-linked kinase [Gallus gallus]	1075	58759	49	47	17	16	34.3	8.36	2.5	Quantitation summary for protein	129/126	1.15	49	[1.029]		130/126	0.928	48	[1.038]		131/126	0.947	49	[1.029]		129/127	1.882	49	1.105	*	130/127	1.492	47	1.102	*	131/127	1.611	49	1.111	*	129/128	1.637	49	[1.069]		130/128	1.304
516	gi|392018	filamin [Gallus gallus]	1070	316763	40	38	17	16	7.8	5.61	0.21	Quantitation summary for protein	129/126	1.074	36	1.031	*	130/126	0.905	36	1.055	*	131/126	0.973	36	[1.024]		129/127	0.769	36	[1.096]		130/127	0.634	36	[1.111]		131/127	0.725	36	[1.102]		129/128	1.076	36	[1.056]		130/128	0.894
517	gi|2511456	beta catenin [Gallus gallus]	1069	92199	42	39	12	10	15.7	5.48	0.63	Quantitation summary for protein	129/126	0.937	35	[1.051]		130/126	0.896	35	1.06	*	131/126	0.968	35	1.037	*	129/127	0.821	35	1.072	*	130/127	0.767	35	1.093	*	131/127	0.882	35	[1.104]		129/128	1.146	35	[1.096]		130/128	1.081
518	gi|53131155	hypothetical protein RCJMB04_11f2 [Gallus gallus]	1067	26282	53	42	10	9	40.3	6.75	4.32	Quantitation summary for protein	129/126	1.047	45	[1.064]		130/126	1.03	45	[1.049]		131/126	1.062	45	[1.049]		129/127	0.753	45	[1.170]		130/127	0.724	45	[1.158]		131/127	0.794	45	[1.182]		129/128	0.876	45	[1.144]		130/128	0.85
519	gi|53128038	hypothetical protein RCJMB04_4h24 [Gallus gallus]	1064	81113	38	34	12	10	21.3	8.05	0.74	Quantitation summary for protein	129/126	1.265	35	[1.054]		130/126	1.056	35	1.044	*	131/126	1.131	35	1.034	*	129/127	0.887	35	1.06	*	130/127	0.724	35	1.077	*	131/127	0.832	34	1.067	*	129/128	1.156	34	1.048	*	130/128	0.95
520	gi|363744275	PREDICTED: phosphoglucomutase 5 [Gallus gallus]	1064	68276	46	40	16	16	32.6	6.73	1.68	Quantitation summary for protein	129/126	1.104	40	1.063	*	130/126	1.038	38	1.039	*	131/126	1.138	40	[1.055]		129/127	1.441	40	1.153	*	130/127	1.333	40	1.148	*	131/127	1.545	40	[1.178]		129/128	1.252	40	1.096	*	130/128	1.168
521	gi|148229985	B-cell receptor-associated protein 29 [Gallus gallus]	1060	32846	32	29	8	6	36.6	9.16	1.16	Quantitation summary for protein	129/126	1.477	29	[1.072]		130/126	1.119	29	1.045	*	131/126	1.112	29	1.058	*	129/127	1.475	29	1.218	*	130/127	1.093	29	1.156	*	131/127	1.156	29	1.161	*	129/128	1.701	29	[1.140]		130/128	1.271
522	gi|53127734	hypothetical protein RCJMB04_3c21 [Gallus gallus]	1059	39091	32	30	8	8	37.5	5.31	1.25	Quantitation summary for protein	129/126	1.246	6	1.026	*	130/126	0.981	6	1.181		131/126	1.074	6	1.056	*	129/127	0.852	6	1.526		130/127	0.656	6	1.363	*	131/127	0.764	6	1.548		129/128	1.18	6	1.087	*	130/128	0.916
523	gi|363728541	PREDICTED: coxsackievirus and adenovirus receptor homolog [Gallus gallus]	1057	45002	36	33	11	11	26.3	6.13	1.34	Quantitation summary for protein	129/126	1.193	33	1.042	*	130/126	1.189	33	1.042	*	131/126	1.044	33	1.035	*	129/127	0.936	33	[1.188]		130/127	0.912	33	[1.199]		131/127	0.852	33	[1.175]		129/128	0.96	33	1.053	*	130/128	0.944
524	gi|53133898	hypothetical protein RCJMB04_21l24 [Gallus gallus]	1055	110597	48	40	15	13	17.3	6.06	0.79	Quantitation summary for protein	129/126	1.43	11	[1.149]		130/126	0.819	11	1.109	*	131/126	0.867	10	1.042	*	129/127	1.951	11	1.281	*	130/127	1.093	11	1.238		131/127	1.107	11	[1.216]		129/128	1.584	11	[1.192]		130/128	0.895
525	gi|53127346	hypothetical protein RCJMB04_1o16 [Gallus gallus]	1054	92937	66	60	14	13	19.7	5.68	0.62	Quantitation summary for protein	129/126	1.244	63	[1.026]		130/126	1.153	63	1.021	*	131/126	1.346	63	1.018	*	129/127	2.332	61	1.084	*	130/127	2.105	61	1.088	*	131/127	2.607	61	[1.101]		129/128	1.681	63	[1.037]		130/128	1.536
526	gi|363740921	PREDICTED: THO complex subunit 4 [Gallus gallus]	1051	29429	30	27	7	6	37.6	11.15	1.62	Quantitation summary for protein	129/126	0.837	27	[1.079]		130/126	0.922	25	1.064	*	131/126	0.79	27	1.057	*	129/127	0.511	27	[1.260]		130/127	0.536	25	[1.268]		131/127	0.502	27	[1.257]		129/128	0.742	27	[1.100]		130/128	0.801
527	gi|63650	unnamed protein product [Gallus gallus]	1051	108936	51	41	13	10	17	4.6	0.47	Quantitation summary for protein	129/126	0.888	39	[1.042]		130/126	1.002	38	1.077		131/126	0.914	39	1.034	*	129/127	0.969	39	[1.169]		130/127	1.069	38	[1.216]		131/127	1.037	39	1.183		129/128	1.07	39	1.112	*	130/128	1.191
528	gi|118088	RecName: Full=Peptidyl-prolyl cis-trans isomerase B; Short=PPIase B; AltName: Full=Cyclophilin B; AltName: Full=Rotamase B; AltName: Full=S-cyclophilin; Short=SCYLP; Flags: Precursor	1049	28185	52	37	11	10	42	9.4	7.35	Quantitation summary for protein	129/126	0.916	38	1.044	*	130/126	0.854	37	1.053	*	131/126	0.98	38	[1.034]		129/127	1.013	38	[1.160]		130/127	0.927	37	[1.170]		131/127	1.127	38	[1.198]		129/128	0.912	38	[1.062]		130/128	0.841
529	gi|53133686	hypothetical protein RCJMB04_19g1 [Gallus gallus]	1046	31831	60	45	17	15	64.8	9.68	8.79	Quantitation summary for protein	129/126	1.062	51	1.054	*	130/126	1.083	50	[1.058]		131/126	1.156	51	[1.063]		129/127	1.524	51	[1.161]		130/127	1.52	50	1.172	*	131/127	1.726	51	[1.200]		129/128	1.125	51	[1.106]		130/128	1.132
530	gi|211095	adynylosuccinate lyase [Gallus gallus]	1045	58568	27	27	7	7	16.8	6.9	0.63	Quantitation summary for protein	129/126	1.568	27	[1.067]		130/126	1.38	27	[1.036]		131/126	1.404	27	1.04	*	129/127	1.603	27	1.062	*	130/127	1.378	27	1.069	*	131/127	1.493	27	1.067	*	129/128	1.884	27	1.05	*	130/128	1.635
531	gi|302120406	plakoglobin [Gallus gallus]	1044	90550	42	39	15	15	22.6	5.75	0.7	Quantitation summary for protein	129/126	1.033	34	1.038	*	130/126	1.027	34	1.034	*	131/126	1.073	34	[1.025]		129/127	1.223	35	1.074	*	130/127	1.416	33	1.087	*	131/127	1.584	34	1.093	*	129/128	1.435	34	1.037	*	130/128	1.406
532	gi|363735211	PREDICTED: LIM domain-binding protein 3-like [Gallus gallus]	1039	75962	57	43	15	14	29.5	8.18	1.14	Quantitation summary for protein	129/126	0.757	45	1.06	*	130/126	0.869	47	1.047	*	131/126	1.012	48	1.04	*	129/127	0.585	46	[1.153]		130/127	0.664	47	[1.129]		131/127	0.794	48	[1.161]		129/128	0.968	46	1.093	*	130/128	1.092
533	gi|53133834	hypothetical protein RCJMB04_20m7 [Gallus gallus]	1032	55777	30	29	9	8	20.9	6.55	0.88	Quantitation summary for protein	129/126	0.951	29	1.045	*	130/126	1.066	28	1.078	*	131/126	1.194	29	1.049	*	129/127	0.735	29	[1.112]		130/127	0.806	28	1.186	*	131/127	0.959	29	[1.177]		129/128	0.762	29	1.058	*	130/128	0.827
534	gi|50753839	PREDICTED: GTP-binding protein RAD [Gallus gallus]	1030	39614	30	29	5	5	20.5	8.7	0.62	Quantitation summary for protein	129/126	0.878	30	1.048	*	130/126	0.896	30	1.052	*	131/126	0.859	30	1.035	*	129/127	0.644	30	[1.195]		130/127	0.643	30	[1.204]		131/127	0.655	30	[1.207]		129/128	0.726	30	[1.066]		130/128	0.73
535	gi|363747261	PREDICTED: poly(rC)-binding protein 2-like isoform 1 [Gallus gallus]	1030	41418	44	31	11	9	35.6	7	2.42	Quantitation summary for protein	129/126	1.139	9	1.07	*	130/126	1.036	9	1.099		131/126	1.157	9	1.071	*	129/127	1.25	9	1.114	*	130/127	1.111	9	1.138	*	131/127	1.321	9	1.117	*	129/128	1.44	9	1.116	*	130/128	1.292
536	gi|63566	unnamed protein product [Gallus gallus]	1028	43880	50	43	14	11	29.5	7.75	2.97	Quantitation summary for protein	129/126	1.912	28	1.085	*	130/126	1.123	28	[1.108]		131/126	0.993	28	[1.044]		129/127	2.63	28	[1.346]		130/127	1.51	28	[1.297]		131/127	1.53	27	1.243	*	129/128	2.452	28	1.162	*	130/128	1.421
537	gi|50737088	PREDICTED: ubiquitin carboxyl-terminal hydrolase 14 isoform 2 [Gallus gallus]	1026	65905	39	35	9	9	21.7	5.09	0.63	Quantitation summary for protein	129/126	1.172	36	1.05	*	130/126	1.232	36	[1.082]		131/126	1.1	36	[1.033]		129/127	1.347	36	1.114	*	130/127	1.383	36	1.151	*	131/127	1.314	36	1.144	*	129/128	1.252	36	[1.069]		130/128	1.039
538	gi|102221132	apolipoprotein B [Gallus gallus]	1026	608851	70	46	32	22	6.6	8.51	0.15	Quantitation summary for protein	129/126	0.97	52	[1.030]		130/126	1.031	52	1.023	*	131/126	0.672	52	[1.048]		129/127	1.211	52	[1.070]		130/127	1.258	52	[1.082]		131/127	0.873	52	[1.089]		129/128	1.031	52	1.035	*	130/128	1.08
539	gi|313747444	mitochondrial-processing peptidase subunit beta [Gallus gallus]	1024	59342	37	35	11	11	24.3	5.96	1.13	Quantitation summary for protein	129/126	1.389	36	[1.062]		130/126	1.143	34	1.046	*	131/126	1.175	36	[1.037]		129/127	1.097	36	[1.104]		130/127	0.887	34	1.1	*	131/127	0.965	36	1.093	*	129/128	1.227	36	[1.110]		130/128	0.998
540	gi|303227902	acetyl-CoA acetyltransferase, cytosolic [Gallus gallus]	1021	45613	30	26	9	8	29.9	7.63	1.48	Quantitation summary for protein	129/126	0.977	30	1.084		130/126	1.042	27	1.096	*	131/126	1.478	29	1.1	*	129/127	0.958	30	1.413		130/127	1.002	27	1.436		131/127	1.504	30	1.498	*	129/128	1.194	30	1.195	*	130/128	1.258
541	gi|53136866	hypothetical protein RCJMB04_35d23 [Gallus gallus]	1020	29529	28	20	8	4	24.1	5.57	0.9	Quantitation summary for protein	129/126	0.744	22	1.084	*	130/126	0.808	21	1.131	*	131/126	0.809	22	1.078	*	129/127	0.505	22	[1.307]		130/127	0.538	21	[1.465]		131/127	0.572	22	[1.367]		129/128	0.586	22	[1.188]		130/128	0.626
542	gi|118088890	PREDICTED: 40S ribosomal protein S7 isoform 6 [Gallus gallus]	1020	41832	56	46	11	10	38.1	9.89	3.94	Quantitation summary for protein	129/126	0.916	53	1.15	*	130/126	0.927	41	1.136	*	131/126	0.914	54	1.135	*	129/127	1.161	51	[1.327]		130/127	1.241	39	[1.341]		131/127	1.2	51	[1.392]		129/128	1.034	51	1.211		130/128	1.056
543	gi|118100169	PREDICTED: AP-1 complex subunit beta-1 [Gallus gallus]	1019	120705	40	35	15	11	18.8	5.19	0.49	Quantitation summary for protein	129/126	1.461	25	[1.043]		130/126	1.253	25	1.035	*	131/126	1.309	25	[1.041]		129/127	1.408	25	[1.146]		130/127	1.18	25	1.14	*	131/127	1.312	25	1.142	*	129/128	1.715	25	1.087	*	130/128	1.451
544	gi|10178878	eukaryote initiation factor 2 beta [Gallus gallus]	1018	49525	38	33	13	10	42.5	5.6	1.47	Quantitation summary for protein	129/126	0.866	36	1.063	*	130/126	0.863	35	1.038	*	131/126	1.132	36	1.041	*	129/127	1.348	35	[1.146]		130/127	1.313	35	[1.172]		131/127	1.831	35	[1.195]		129/128	1.53	35	1.101	*	130/128	1.504
545	gi|50729254	PREDICTED: 2-amino-3-ketobutyrate coenzyme A ligase, mitochondrial [Gallus gallus]	1018	50266	32	29	11	9	33.9	8.51	1.76	Quantitation summary for protein	129/126	1.756	32	[1.112]		130/126	1.24	30	[1.146]		131/126	1.166	32	[1.113]		129/127	1.644	32	1.282	*	130/127	1.135	30	1.331	*	131/127	1.136	32	1.316	*	129/128	1.754	32	1.197	*	130/128	1.223
546	gi|16930387	cardiac and skeletal muscle-specific BOP1 [Gallus gallus]	1017	65839	55	46	12	10	24.7	6.83	1.29	Quantitation summary for protein	129/126	1.185	53	[1.041]		130/126	0.913	53	[1.038]		131/126	1.147	53	[1.031]		129/127	1.842	53	1.108	*	130/127	1.388	53	[1.112]		131/127	1.854	53	1.114	*	129/128	1.716	53	[1.098]		130/128	1.304
547	gi|363746871	PREDICTED: 3-hydroxyacyl-CoA dehydrogenase type-2-like [Gallus gallus]	1016	13862	30	28	7	7	67.5	6.71	26.04	Quantitation summary for protein	129/126	1.009	12	1.137		130/126	1.369	12	1.211	*	131/126	0.822	12	[1.123]		129/127	0.378	12	1.521	*	130/127	0.501	12	1.49	*	131/127	0.32	12	1.493	*	129/128	0.649	12	1.281	*	130/128	0.868
548	gi|60098981	hypothetical protein RCJMB04_17m6 [Gallus gallus]	1011	21642	19	19	1	1	12.7	5.09	0.54	Quantitation summary for protein	129/126	1.172	18	1.075	*	130/126	1.012	18	1.084		131/126	0.888	18	1.047	*	129/127	1.053	19	[1.121]		130/127	0.895	18	1.122	*	131/127	0.876	19	1.091	*	129/128	1.067	19	1.119	*	130/128	0.92
549	gi|50750403	PREDICTED: metaxin-2 isoform 2 [Gallus gallus]	1011	35169	32	29	6	5	25	5.63	1.06	Quantitation summary for protein	129/126	1.313	30	[1.030]		130/126	1.047	28	1.033	*	131/126	1.133	30	[1.030]		129/127	1.696	30	[1.119]		130/127	1.415	29	[1.107]		131/127	1.522	30	[1.121]		129/128	1.404	30	1.065	*	130/128	1.136
550	gi|363740290	PREDICTED: delta-aminolevulinic acid dehydratase [Gallus gallus]	1008	40282	42	33	14	12	42.9	7.08	3.14	Quantitation summary for protein	129/126	0.974	37	1.067	*	130/126	0.954	34	1.041	*	131/126	1.018	37	[1.054]		129/127	0.712	37	[1.198]		130/127	0.667	35	[1.252]		131/127	0.774	37	[1.259]		129/128	0.809	36	[1.105]		130/128	0.77
551	gi|363742348	PREDICTED: trans-2-enoyl-CoA reductase, mitochondrial [Gallus gallus]	1008	40291	36	35	6	6	23.5	7.08	0.74	Quantitation summary for protein	129/126	1.009	36	1.04		130/126	0.923	35	1.041	*	131/126	0.842	36	1.035	*	129/127	1.277	36	[1.142]		130/127	1.143	35	[1.139]		131/127	1.108	36	[1.145]		129/128	1.235	36	1.068	*	130/128	1.116
552	gi|363742292	PREDICTED: splicing factor, proline- and glutamine-rich [Gallus gallus]	1005	77206	55	47	19	16	31.4	9.49	1.2	Quantitation summary for protein	129/126	0.849	47	[1.036]		130/126	0.812	47	1.041	*	131/126	0.893	47	1.03	*	129/127	1.16	48	[1.110]		130/127	1.085	48	[1.121]		131/127	1.27	48	[1.122]		129/128	1.113	48	[1.082]		130/128	1.051
553	gi|444299628	nascent polypeptide-associated complex alpha subunit [Gallus gallus]	1005	27274	29	25	6	6	34.9	4.56	2.98	Quantitation summary for protein	129/126	0.765	25	[1.098]		130/126	0.833	24	[1.079]		131/126	0.988	26	[1.053]		129/127	1.728	25	[1.325]		130/127	1.853	24	[1.399]		131/127	2.273	26	[1.425]		129/128	1.07	25	[1.134]		130/128	1.15
554	gi|517098	phosphatase 2A catalytic subunit [Gallus gallus]	1004	38631	28	27	7	7	35	5.22	1.1	Quantitation summary for protein	129/126	1.329	2	1.013	*	130/126	1.511	2	1.782		131/126	1.024	2	1.027		129/127	0.955	2	1.837		130/127	1.062	2	1.044		131/127	0.766	2	1.81		129/128	1.21	2	1.165		130/128	1.358
555	gi|53127772	hypothetical protein RCJMB04_3f15 [Gallus gallus]	1002	23812	43	42	11	11	50	5.37	4.5	Quantitation summary for protein	129/126	1.01	43	[1.104]		130/126	1.164	42	1.071	*	131/126	1.364	43	[1.079]		129/127	0.924	43	[1.209]		130/127	1.07	42	[1.250]		131/127	1.297	43	[1.294]		129/128	1.221	43	[1.138]		130/128	1.391
556	gi|359740	acylphosphatase isozyme Ch1	1001	13849	25	22	5	4	45.1	9.52	3.66	Quantitation summary for protein	129/126	1.136	23	[1.137]		130/126	1.117	23	1.059	*	131/126	0.753	23	1.109	*	129/127	0.526	21	[1.305]		130/127	0.49	21	[1.456]		131/127	0.347	21	[1.599]		129/128	0.699	23	[1.184]		130/128	0.678
557	gi|363734612	PREDICTED: plasma protease C1 inhibitor-like [Gallus gallus]	1001	57999	37	33	10	9	24.5	5.73	1.05	Quantitation summary for protein	129/126	0.701	34	1.095	*	130/126	0.778	32	1.052	*	131/126	0.593	34	1.07	*	129/127	0.561	34	[1.196]		130/127	0.608	33	[1.292]		131/127	0.494	34	[1.253]		129/128	0.749	34	1.11	*	130/128	0.817
558	gi|363743615	PREDICTED: mitochondrial import inner membrane translocase subunit Tim13-A-like [Gallus gallus]	1001	12835	33	29	5	5	57.4	8.42	15.93	Quantitation summary for protein	129/126	0.763	29	1.087	*	130/126	1.021	26	1.092		131/126	0.764	28	1.061	*	129/127	0.567	29	1.217	*	130/127	0.739	26	1.22	*	131/127	0.595	29	1.244	*	129/128	0.657	29	1.129	*	130/128	0.864
559	gi|363741946	PREDICTED: ATPase family AAA domain-containing protein 3 [Gallus gallus]	1001	77551	38	31	14	11	23.2	9.34	0.71	Quantitation summary for protein	129/126	0.919	35	[1.044]		130/126	1.059	35	1.043	*	131/126	0.988	35	1.024	*	129/127	0.937	35	1.119	*	130/127	1.055	35	1.137	*	131/127	1.047	35	1.14	*	129/128	0.789	35	1.056	*	130/128	0.896
560	gi|19335967	diazepam binding inhibitor [Gallus gallus]	999	13007	48	36	7	6	58.6	6.56	12.1	Quantitation summary for protein	129/126	---	1	---		130/126	---	1	---		131/126	---	1	---		129/127	---	1	---		130/127	---	1	---		131/127	---	1	---		129/128	---	1	---		130/128	---
561	gi|93209536	GTP-binding protein [Gallus gallus]	998	27027	35	26	9	6	43.8	5.42	2.21	Quantitation summary for protein	129/126	0.764	31	1.049	*	130/126	1.003	30	1.036		131/126	0.98	31	1.029	*	129/127	1.072	31	1.174	*	130/127	1.374	30	[1.210]		131/127	1.43	31	[1.211]		129/128	0.785	31	[1.090]		130/128	1.016
562	gi|212485	ovoinhibitor [Gallus gallus]	997	60582	49	43	14	13	29.2	6.16	1.59	Quantitation summary for protein	129/126	0.684	46	1.079	*	130/126	1.056	44	[1.056]		131/126	0.876	46	[1.055]		129/127	1.095	46	1.116	*	130/127	1.666	44	1.146	*	131/127	1.46	46	1.15	*	129/128	0.991	46	[1.080]		130/128	1.515
563	gi|363743527	PREDICTED: membrane primary amine oxidase isoform 2 [Gallus gallus]	997	89295	41	34	17	15	30	6.07	1.06	Quantitation summary for protein	129/126	1.272	36	1.051	*	130/126	1.19	34	1.054	*	131/126	1.053	36	[1.050]		129/127	0.972	35	[1.172]		130/127	0.889	34	[1.195]		131/127	0.838	35	1.171	*	129/128	1.016	35	[1.084]		130/128	0.937
564	gi|53133904	hypothetical protein RCJMB04_21m21 [Gallus gallus]	996	37202	63	41	13	7	46.8	9.31	4.06	Quantitation summary for protein	129/126	0.792	44	[1.077]		130/126	1.02	44	[1.096]		131/126	0.797	44	[1.081]		129/127	0.834	44	[1.280]		130/127	1.05	44	[1.273]		131/127	0.873	44	[1.272]		129/128	0.753	44	1.135	*	130/128	0.957
565	gi|118103033	PREDICTED: synaptic vesicle membrane protein VAT-1 homolog [Gallus gallus]	994	48410	32	29	9	8	27	6.18	0.93	Quantitation summary for protein	129/126	0.726	30	1.047	*	130/126	0.893	30	1.074	*	131/126	0.819	30	1.041	*	129/127	0.745	30	1.057	*	130/127	0.895	30	1.074	*	131/127	0.874	30	[1.061]		129/128	0.622	30	[1.063]		130/128	0.754
566	gi|118102574	PREDICTED: prolargin [Gallus gallus]	993	48788	44	38	10	10	29.7	9.11	1.34	Quantitation summary for protein	129/126	0.737	42	1.05	*	130/126	0.833	40	1.051	*	131/126	0.832	42	[1.037]		129/127	1.248	42	[1.144]		130/127	1.38	40	1.169	*	131/127	1.451	41	1.143	*	129/128	1.025	42	1.07	*	130/128	1.143
567	gi|47678122	small heat shock protein B2 [Gallus gallus]	991	21666	41	37	6	5	33.5	5.8	3.23	Quantitation summary for protein	129/126	0.871	38	[1.069]		130/126	0.925	30	1.087	*	131/126	0.779	38	1.058	*	129/127	1.238	38	1.195	*	130/127	1.332	31	1.192	*	131/127	1.152	38	1.202	*	129/128	1.362	36	1.115	*	130/128	1.492
568	gi|15341202	filamin [Gallus gallus]	988	303590	30	29	14	13	7	5.94	0.16	Quantitation summary for protein	129/126	0.982	26	1.033	*	130/126	0.85	26	1.06	*	131/126	0.929	26	1.03	*	129/127	0.78	26	[1.082]		130/127	0.66	26	1.108	*	131/127	0.767	26	[1.089]		129/128	1.298	26	1.061	*	130/128	1.109
569	gi|50746905	PREDICTED: 3-hydroxybutyrate dehydrogenase type 2 [Gallus gallus]	988	31085	54	47	14	13	48.6	6.84	5.23	Quantitation summary for protein	129/126	0.832	51	[1.091]		130/126	1.127	51	[1.050]		131/126	1.13	51	[1.060]		129/127	1.044	50	[1.206]		130/127	1.372	50	[1.248]		131/127	1.461	50	1.283	*	129/128	0.806	50	[1.135]		130/128	1.07
570	gi|53128246	hypothetical protein RCJMB04_4k19 [Gallus gallus]	987	81447	42	34	17	15	38	5.16	1.2	Quantitation summary for protein	129/126	0.848	33	1.04	*	130/126	1.081	31	1.039	*	131/126	1.183	33	1.028	*	129/127	1.082	33	1.121	*	130/127	1.37	33	[1.139]		131/127	1.57	33	1.157	*	129/128	1.044	33	1.076	*	130/128	1.333
571	gi|363733681	PREDICTED: microtubule-associated tumor suppressor 1 homolog isoform 2 [Gallus gallus]	985	87401	33	31	10	8	18	9.34	0.5	Quantitation summary for protein	129/126	1.27	32	1.033	*	130/126	1.109	32	[1.044]		131/126	1.139	32	1.031	*	129/127	1.493	32	1.118	*	130/127	1.275	32	1.137	*	131/127	1.393	32	1.139	*	129/128	1.251	32	1.059	*	130/128	1.077
572	gi|53133816	hypothetical protein RCJMB04_20k1 [Gallus gallus]	982	36381	61	51	12	12	46.3	10.83	4.23	Quantitation summary for protein	129/126	1.325	53	1.041	*	130/126	1.178	52	[1.058]		131/126	1.199	53	1.035	*	129/127	0.935	53	[1.140]		130/127	0.816	52	1.146	*	131/127	0.88	53	[1.149]		129/128	1.145	53	[1.071]		130/128	1.004
573	gi|53126533	hypothetical protein RCJMB04_1e12 [Gallus gallus]	981	120754	44	34	20	16	19.6	4.96	0.57	Quantitation summary for protein	129/126	1.462	37	1.042	*	130/126	1.215	37	1.034	*	131/126	1.277	37	1.039	*	129/127	1.889	37	[1.100]		130/127	1.535	37	1.126	*	131/127	1.718	37	1.127	*	129/128	1.957	37	1.064	*	130/128	1.605
574	gi|60098741	hypothetical protein RCJMB04_7k16 [Gallus gallus]	979	59671	66	49	20	19	44.8	8.76	2.82	Quantitation summary for protein	129/126	1.101	57	[1.063]		130/126	0.903	56	[1.061]		131/126	0.938	57	[1.049]		129/127	0.94	57	1.091	*	130/127	0.753	56	[1.138]		131/127	0.833	57	[1.168]		129/128	1.102	57	1.066	*	130/128	0.891
575	gi|363745440	PREDICTED: importin subunit beta-1-like [Gallus gallus]	979	106649	36	32	11	10	13.9	4.69	0.57	Quantitation summary for protein	129/126	1.519	35	1.034	*	130/126	1.393	35	[1.042]		131/126	1.333	35	1.026	*	129/127	1.226	35	1.099	*	130/127	1.099	35	1.109	*	131/127	1.119	35	1.093	*	129/128	1.521	35	1.078	*	130/128	1.377
576	gi|363743810	PREDICTED: NADH dehydrogenase [ubiquinone] iron-sulfur protein 7, mitochondrial-like [Gallus gallus]	979	26937	48	38	8	6	28.9	9.59	3.05	Quantitation summary for protein	129/126	1.029	41	1.028	*	130/126	1.165	41	1.063	*	131/126	0.935	41	1.039	*	129/127	0.775	41	[1.117]		130/127	0.857	41	[1.140]		131/127	0.732	41	[1.125]		129/128	0.888	41	[1.090]		130/128	0.992
577	gi|40950628	syntaxin 1-binding protein [Gallus gallus]	978	79975	38	28	18	13	35.2	6.49	0.9	Quantitation summary for protein	129/126	1.101	34	[1.057]		130/126	1.224	33	[1.058]		131/126	1.214	34	[1.040]		129/127	1.131	34	[1.162]		130/127	1.228	33	[1.202]		131/127	1.297	34	[1.204]		129/128	1.317	34	[1.109]		130/128	1.444
578	gi|53134140	hypothetical protein RCJMB04_22k18 [Gallus gallus]	977	58416	30	26	12	11	37.3	4.9	1.4	Quantitation summary for protein	129/126	1.56	28	1.053	*	130/126	1.069	28	1.055	*	131/126	1.143	26	1.033	*	129/127	1.848	28	1.178	*	130/127	1.238	28	1.167	*	131/127	1.43	28	1.175	*	129/128	1.973	28	[1.140]		130/128	1.334
579	gi|118098520	PREDICTED: diablo homolog, mitochondrial [Gallus gallus]	976	28889	35	33	9	8	43.8	6.19	2.32	Quantitation summary for protein	129/126	0.803	32	[1.056]		130/126	1.105	30	1.036	*	131/126	0.789	31	[1.041]		129/127	1.078	30	1.144	*	130/127	1.445	30	[1.191]		131/127	1.101	30	[1.184]		129/128	0.792	32	[1.086]		130/128	1.072
580	gi|33328126	ARVCF [Gallus gallus]	975	124131	36	30	15	13	22	6.18	0.48	Quantitation summary for protein	129/126	0.919	33	1.064	*	130/126	0.698	32	[1.059]		131/126	0.918	33	1.045	*	129/127	0.855	33	[1.113]		130/127	0.638	32	1.152	*	131/127	0.888	33	1.168	*	129/128	1.145	33	1.078	*	130/128	0.86
581	gi|118093564	PREDICTED: protein lunapark [Gallus gallus]	969	53189	53	45	10	10	27.9	5.33	1.18	Quantitation summary for protein	129/126	1.19	50	[1.037]		130/126	1.145	49	1.034	*	131/126	1.173	50	[1.039]		129/127	1.101	50	[1.078]		130/127	1.036	49	[1.058]		131/127	1.128	50	[1.065]		129/128	1.339	50	1.036	*	130/128	1.269
582	gi|6601335	LIS1 [Gallus gallus]	967	55225	34	27	13	11	31.7	6.97	1.25	Quantitation summary for protein	129/126	0.927	31	1.061	*	130/126	0.919	28	1.038	*	131/126	1.012	31	1.032	*	129/127	1.916	31	1.128	*	130/127	1.883	29	[1.152]		131/127	2.176	31	1.158	*	129/128	1.245	31	1.077	*	130/128	1.236
583	gi|363737883	PREDICTED: dnaJ homolog subfamily A member 4 [Gallus gallus]	966	59413	31	30	8	8	24.5	7.9	0.91	Quantitation summary for protein	129/126	0.797	28	1.043	*	130/126	0.794	30	1.067	*	131/126	0.921	30	[1.042]		129/127	1.495	30	[1.105]		130/127	1.454	30	[1.110]		131/127	1.796	30	[1.135]		129/128	1.363	30	1.081	*	130/128	1.338
584	gi|60098571	hypothetical protein RCJMB04_3m24 [Gallus gallus]	964	123578	37	31	15	13	14.1	5.23	0.4	Quantitation summary for protein	129/126	1.301	30	1.041	*	130/126	1.219	31	1.027	*	131/126	1.308	31	1.027	*	129/127	1.222	31	[1.092]		130/127	1.112	31	[1.114]		131/127	1.27	31	[1.130]		129/128	1.465	31	[1.068]		130/128	1.345
585	gi|118090250	PREDICTED: septin-11 [Gallus gallus]	964	60672	51	35	15	12	34.8	6.53	1.45	Quantitation summary for protein	129/126	0.956	10	1.025	*	130/126	1.03	11	1.062		131/126	1.012	12	1.033		129/127	0.921	12	1.149		130/127	0.933	12	1.141		131/127	1.007	12	1.168		129/128	0.893	12	1.112	*	130/128	0.913
586	gi|53130690	hypothetical protein RCJMB04_9i5 [Gallus gallus]	964	23380	28	27	8	8	37.2	5.53	3.35	Quantitation summary for protein	129/126	0.817	15	[1.179]		130/126	1.141	15	1.059	*	131/126	1.347	15	[1.123]		129/127	3.436	15	1.289	*	130/127	4.69	15	1.27	*	131/127	5.89	15	1.382	*	129/128	1.925	15	1.22	*	130/128	2.652
587	gi|54151003	TPA_inf: HN1 [Gallus gallus]	958	18216	37	31	6	5	65.4	4.83	3.62	Quantitation summary for protein	129/126	0.739	32	1.07	*	130/126	0.774	30	1.069	*	131/126	1.015	32	1.051		129/127	1.177	31	1.201	*	130/127	1.2	30	[1.218]		131/127	1.68	31	[1.246]		129/128	1.123	31	1.139	*	130/128	1.157
588	gi|16904069	adipocyte fatty acid binding protein [Gallus gallus]	957	18436	31	27	8	6	51.5	6.34	4.37	Quantitation summary for protein	129/126	1.451	22	[1.088]		130/126	1.764	22	1.11	*	131/126	1.774	21	1.112	*	129/127	1.017	22	[1.407]		130/127	1.209	22	[1.560]		131/127	1.289	22	[1.628]		129/128	0.91	22	[1.200]		130/128	1.092
589	gi|459683873	dehydrogenase/reductase SDR family member 4 [Gallus gallus]	956	30420	33	31	10	9	33.3	9.26	3.27	Quantitation summary for protein	129/126	0.988	32	[1.063]		130/126	1.129	32	[1.090]		131/126	0.998	32	[1.054]		129/127	1.002	32	[1.150]		130/127	1.118	32	[1.187]		131/127	1.052	32	1.188		129/128	0.916	32	[1.108]		130/128	1.045
590	gi|50753780	PREDICTED: programmed cell death protein 5 [Gallus gallus]	956	16960	35	34	8	8	63.5	5.53	6.37	Quantitation summary for protein	129/126	0.706	35	1.073	*	130/126	0.82	31	[1.152]		131/126	0.856	35	[1.085]		129/127	1.605	35	[1.281]		130/127	1.825	31	[1.311]		131/127	2.024	35	[1.300]		129/128	0.965	34	[1.150]		130/128	1.104
591	gi|118085596	PREDICTED: presequence protease, mitochondrial [Gallus gallus]	952	135284	56	49	25	24	27	6.48	0.86	Quantitation summary for protein	129/126	1.208	51	[1.054]		130/126	1.226	51	1.033	*	131/126	1.255	51	[1.037]		129/127	1.378	51	1.11	*	130/127	1.366	51	1.117	*	131/127	1.489	51	1.132	*	129/128	1.285	51	1.067	*	130/128	1.286
592	gi|118084684	PREDICTED: citrate lyase beta like [Gallus gallus]	950	47542	42	39	14	13	39.8	9.18	1.74	Quantitation summary for protein	129/126	0.713	40	1.051	*	130/126	0.712	37	1.068	*	131/126	0.719	40	[1.044]		129/127	1.089	40	[1.106]		130/127	1.071	37	1.151	*	131/127	1.141	40	[1.145]		129/128	0.958	40	1.056	*	130/128	0.911
593	gi|515838	single stranded D box binding factor [Gallus gallus]	948	38831	33	31	8	8	19.2	8.62	1.46	Quantitation summary for protein	129/126	0.861	31	1.127	*	130/126	0.811	31	1.062	*	131/126	0.992	31	[1.093]		129/127	0.808	31	1.285	*	130/127	0.744	31	1.388	*	131/127	0.969	31	1.451		129/128	0.96	31	1.136		130/128	0.892
594	gi|53133724	hypothetical protein RCJMB04_19l6 [Gallus gallus]	947	38917	31	24	6	6	35.9	5.04	1.89	Quantitation summary for protein	129/126	1.16	30	1.059	*	130/126	0.951	27	1.07	*	131/126	1.108	30	1.043	*	129/127	0.728	29	[1.184]		130/127	0.564	28	1.227	*	131/127	0.723	29	[1.202]		129/128	0.924	30	[1.121]		130/128	0.724
595	gi|363728259	PREDICTED: alpha-2-macroglobulin-like protein 1-like [Gallus gallus]	943	223657	52	37	18	13	10.7	5.69	0.32	Quantitation summary for protein	129/126	0.972	41	[1.065]		130/126	1.037	39	1.047	*	131/126	0.632	41	1.059	*	129/127	0.587	41	[1.173]		130/127	0.609	39	[1.228]		131/127	0.397	41	[1.204]		129/128	0.563	41	[1.100]		130/128	0.596
596	gi|53135109	hypothetical protein RCJMB04_24h4 [Gallus gallus]	943	27192	29	27	6	6	43.3	8.31	2.18	Quantitation summary for protein	129/126	1.076	9	1.054	*	130/126	1.139	9	1.111	*	131/126	1.049	9	1.049	*	129/127	0.827	9	1.138	*	130/127	0.856	9	1.181	*	131/127	0.839	9	[1.147]		129/128	0.847	9	1.078	*	130/128	0.884
597	gi|53129929	hypothetical protein RCJMB04_6f1 [Gallus gallus]	942	45199	49	37	20	18	48.4	8.34	5.26	Quantitation summary for protein	129/126	1.234	44	[1.075]		130/126	0.973	43	1.064	*	131/126	0.991	44	[1.045]		129/127	1.094	44	1.185	*	130/127	0.844	43	1.205	*	131/127	0.963	43	1.188		129/128	1.213	43	1.1	*	130/128	0.891
598	gi|53136700	hypothetical protein RCJMB04_32j11 [Gallus gallus]	936	27265	29	27	6	5	36.3	8.29	2.55	Quantitation summary for protein	129/126	0.934	14	[1.091]		130/126	1.119	14	[1.106]		131/126	0.987	14	1.074		129/127	0.898	14	[1.232]		130/127	1.052	14	[1.261]		131/127	0.988	14	[1.178]		129/128	0.553	14	1.094	*	130/128	0.654
599	gi|118093509	PREDICTED: isocitrate dehydrogenase [NADP] cytoplasmic [Gallus gallus]	935	55451	53	38	23	15	45.3	8.02	3.22	Quantitation summary for protein	129/126	1.008	34	1.058		130/126	0.866	34	1.057	*	131/126	0.951	34	1.046	*	129/127	1.768	33	1.152	*	130/127	1.468	34	1.204	*	131/127	1.717	34	1.226	*	129/128	1.136	34	1.075	*	130/128	0.962
600	gi|212243	l-caldesmon [Gallus gallus]	934	74349	50	40	17	15	36.2	8.66	1.27	Quantitation summary for protein	129/126	0.412	3	1.079	*	130/126	0.707	3	1.023	*	131/126	1.248	3	1.008	*	129/127	2.239	3	1.016	*	130/127	3.75	3	1.09	*	131/127	7.046	3	1.072	*	129/128	1.578	3	1.03	*	130/128	2.666
601	gi|53130868	hypothetical protein RCJMB04_10k21 [Gallus gallus]	932	62759	42	36	13	10	28	6.66	0.94	Quantitation summary for protein	129/126	1.188	23	[1.035]		130/126	0.988	23	1.023	*	131/126	1.204	23	1.029	*	129/127	1.408	23	1.126	*	130/127	1.301	22	1.103	*	131/127	1.701	22	1.115	*	129/128	1.825	23	1.083	*	130/128	1.498
602	gi|53129334	hypothetical protein RCJMB04_5j20 [Gallus gallus]	932	39452	39	33	10	9	40.8	7.13	1.63	Quantitation summary for protein	129/126	0.695	37	1.062	*	130/126	0.927	37	1.054	*	131/126	0.759	37	1.038	*	129/127	1.241	37	[1.112]		130/127	1.619	37	1.13	*	131/127	1.41	37	1.152	*	129/128	1.041	36	1.077	*	130/128	1.361
603	gi|9247221	protein phosphatase 1M regulatory subunit [Gallus gallus]	931	26361	32	27	7	7	31.7	9.64	1.93	Quantitation summary for protein	129/126	0.637	28	[1.088]		130/126	0.624	28	[1.122]		131/126	0.856	28	[1.043]		129/127	0.985	28	[1.146]		130/127	0.943	28	[1.131]		131/127	1.375	28	[1.188]		129/128	0.885	26	1.039	*	130/128	0.912
604	gi|118082912	PREDICTED: tRNA-splicing ligase RtcB homolog [Gallus gallus]	931	63053	46	39	14	14	34.5	6.79	1.26	Quantitation summary for protein	129/126	0.989	45	1.038		130/126	0.999	45	1.039		131/126	1.257	45	1.026	*	129/127	1.372	45	[1.106]		130/127	1.354	45	1.12	*	131/127	1.814	45	1.127	*	129/128	1.346	45	1.068	*	130/128	1.34
605	gi|53130368	hypothetical protein RCJMB04_7e17 [Gallus gallus]	930	84507	33	25	12	10	22.1	8.88	0.77	Quantitation summary for protein	129/126	0.863	27	1.047	*	130/126	0.936	26	1.068	*	131/126	0.909	27	1.041	*	129/127	0.664	27	[1.093]		130/127	0.702	26	1.124	*	131/127	0.728	27	1.118	*	129/128	0.962	27	1.066	*	130/128	1.03
606	gi|438525	progesterone receptor, partial [Gallus gallus]	930	19837	32	31	5	4	32.2	4.22	1.99	Quantitation summary for protein	129/126	0.979	32	[1.115]		130/126	0.893	32	1.047	*	131/126	1.025	32	[1.055]		129/127	1.391	32	[1.147]		130/127	1.24	32	[1.225]		131/127	1.515	32	[1.267]		129/128	1.057	32	1.09	*	130/128	0.951
607	gi|53132606	hypothetical protein RCJMB04_13k21 [Gallus gallus]	930	19361	45	37	8	7	38.9	7.85	7.08	Quantitation summary for protein	129/126	0.942	40	[1.089]		130/126	0.941	39	[1.065]		131/126	0.959	40	1.043	*	129/127	0.89	39	[1.198]		130/127	0.876	39	[1.197]		131/127	0.95	39	[1.181]		129/128	1.022	40	1.138		130/128	1.006
608	gi|53127520	hypothetical protein RCJMB04_2m6 [Gallus gallus]	928	23600	35	28	8	8	40.9	6.84	5.38	Quantitation summary for protein	129/126	0.887	19	[1.151]		130/126	1.388	19	1.099	*	131/126	1.203	19	1.112	*	129/127	2.19	19	[1.239]		130/127	3.35	19	1.35	*	131/127	3.09	19	1.455	*	129/128	1.097	19	[1.211]		130/128	1.693
609	gi|60098845	hypothetical protein RCJMB04_11o11 [Gallus gallus]	928	28915	42	39	12	12	64	6.05	8.9	Quantitation summary for protein	129/126	0.779	41	[1.103]		130/126	0.876	41	1.067	*	131/126	1.036	41	1.056	*	129/127	0.982	41	1.203		130/127	1.08	41	1.284		131/127	1.359	41	1.3	*	129/128	0.975	41	1.13		130/128	1.082
610	gi|226874900	proteasome subunit alpha type-2 [Gallus gallus]	926	29455	30	23	6	5	29.9	6.97	1.62	Quantitation summary for protein	129/126	0.814	27	1.045	*	130/126	0.973	25	1.04	*	131/126	1.175	26	1.023	*	129/127	0.952	27	[1.081]		130/127	1.12	25	[1.111]		131/127	1.428	27	[1.111]		129/128	0.91	27	[1.056]		130/128	1.088
611	gi|471434827	chromosome 1 open reading frame, human C11orf54 [Gallus gallus]	926	41072	35	32	12	11	46.2	6.16	1.74	Quantitation summary for protein	129/126	0.87	32	1.042	*	130/126	0.89	31	1.05	*	131/126	0.894	32	1.034	*	129/127	0.579	32	[1.236]		130/127	0.609	31	[1.255]		131/127	0.619	32	1.23	*	129/128	0.758	32	1.113	*	130/128	0.781
612	gi|323690111	A-kinase anchor protein 2 [Gallus gallus]	924	109449	48	43	14	12	19.2	5.25	0.42	Quantitation summary for protein	129/126	0.908	44	1.039	*	130/126	0.855	43	1.037	*	131/126	0.981	44	1.023	*	129/127	0.809	44	[1.114]		130/127	0.738	44	[1.140]		131/127	0.908	44	[1.151]		129/128	1.188	44	[1.058]		130/128	1.094
613	gi|363747239	PREDICTED: drebrin-like [Gallus gallus]	920	58065	35	32	13	12	32.2	5.14	1.29	Quantitation summary for protein	129/126	0.859	33	[1.074]		130/126	0.882	30	1.08	*	131/126	1.072	33	[1.053]		129/127	0.65	33	[1.318]		130/127	0.709	30	[1.223]		131/127	0.843	33	[1.316]		129/128	0.843	33	[1.131]		130/128	0.863
614	gi|63333	unnamed protein product [Gallus gallus]	920	88833	52	39	21	17	36.2	4.88	1.3	Quantitation summary for protein	129/126	1.603	5	1.049	*	130/126	1.792	5	1.285	*	131/126	1.294	5	1.043	*	129/127	1.69	5	1.177	*	130/127	1.847	5	1.42	*	131/127	1.419	5	1.146	*	129/128	1.453	5	1.209	*	130/128	1.602
615	gi|212060	Ig light chain [Gallus gallus]	917	27067	81	65	6	4	22.9	5.58	1.84	Quantitation summary for protein	129/126	---	0	---		130/126	---	0	---		131/126	---	0	---		129/127	---	0	---		130/127	---	0	---		131/127	---	0	---		129/128	---	0	---		130/128	---
616	gi|212195	Ig light chain precursor [Gallus gallus]	916	26501	80	65	5	4	17	5.89	1.58	Quantitation summary for protein	129/126	0.889	8	[1.183]		130/126	0.949	8	1.089		131/126	0.883	8	[1.117]		129/127	0.469	8	1.071	*	130/127	0.49	8	1.101	*	131/127	0.485	8	1.051	*	129/128	0.629	8	1.137	*	130/128	0.663
617	gi|83743084	carnitine palmitoyltransferase I [Gallus gallus]	916	29398	30	28	7	7	33.2	8.68	2.25	Quantitation summary for protein	129/126	2.021	29	[1.095]		130/126	1.712	29	[1.073]		131/126	1.471	29	[1.064]		129/127	2.499	29	[1.215]		130/127	2.069	29	[1.206]		131/127	1.893	29	[1.203]		129/128	2.016	29	[1.133]		130/128	1.685
618	gi|402296	ribosomal protein S4 [Gallus gallus]	912	36221	43	35	12	11	46.4	10.16	3.06	Quantitation summary for protein	129/126	1.081	41	1.044	*	130/126	1.114	40	1.054	*	131/126	1.28	41	1.059	*	129/127	2.001	41	1.161	*	130/127	2.027	40	1.184	*	131/127	2.465	41	1.205	*	129/128	1.584	41	1.101	*	130/128	1.614
619	gi|363734702	PREDICTED: acyl-coenzyme A thioesterase 2, mitochondrial-like [Gallus gallus]	907	56695	40	33	13	13	31.1	9.13	1.76	Quantitation summary for protein	129/126	1.034	34	1.05	*	130/126	1.064	33	1.051	*	131/126	1.065	34	1.053	*	129/127	1.447	34	1.141	*	130/127	1.461	33	1.152	*	131/127	1.551	34	1.169	*	129/128	1.174	34	1.086	*	130/128	1.192
620	gi|363735768	PREDICTED: poly(rC)-binding protein 3-like [Gallus gallus]	905	40737	38	26	9	7	28.6	8.22	1.76	Quantitation summary for protein	129/126	1.09	3	1.052		130/126	1.025	3	1.044		131/126	1.211	3	1.033	*	129/127	0.975	3	1.039		130/127	0.896	3	1.048		131/127	1.127	3	[1.032]		129/128	0.939	3	1.026		130/128	0.871
621	gi|363738082	PREDICTED: guanine nucleotide-binding protein G(o) subunit alpha isoform 6, partial [Gallus gallus]	905	44257	33	27	10	9	35.9	5.23	1.37	Quantitation summary for protein	129/126	1.541	21	[1.094]		130/126	1.436	21	1.057	*	131/126	1.247	21	1.055	*	129/127	1.705	21	[1.163]		130/127	1.553	21	1.216	*	131/127	1.435	21	[1.227]		129/128	1.68	21	1.081	*	130/128	1.545
622	gi|118098353	PREDICTED: clathrin heavy chain 1 [Gallus gallus]	903	214434	48	39	25	19	15	5.54	0.44	Quantitation summary for protein	129/126	1.575	6	1.088	*	130/126	1.478	6	1.127	*	131/126	1.394	6	1.11	*	129/127	0.986	6	1.181		130/127	0.904	6	1.252		131/127	0.907	6	1.206		129/128	1.535	6	1.186	*	130/128	1.421
623	gi|363742430	PREDICTED: adenylyl cyclase-associated protein 1 [Gallus gallus]	903	66834	58	47	16	13	27.6	8.2	1.37	Quantitation summary for protein	129/126	0.9	51	[1.030]		130/126	0.952	50	[1.040]		131/126	1.047	51	1.021	*	129/127	1.058	51	1.072	*	130/127	1.098	50	1.076	*	131/127	1.28	51	1.083	*	129/128	0.895	51	[1.037]		130/128	0.937
624	gi|53127744	hypothetical protein RCJMB04_3d14 [Gallus gallus]	900	59770	52	37	14	11	33.1	6.67	1.23	Quantitation summary for protein	129/126	0.931	11	1.047	*	130/126	0.821	12	1.078	*	131/126	1.201	12	[1.071]		129/127	1.042	11	1.222		130/127	0.942	11	1.234		131/127	1.487	11	1.331	*	129/128	0.932	12	1.206		130/128	0.844
625	gi|7415601	protein kinase C inhibitor [Gallus gallus]	898	15697	36	29	7	7	63.5	6.28	7.66	Quantitation summary for protein	129/126	1.186	31	1.057	*	130/126	1.157	30	1.108	*	131/126	0.939	31	[1.059]		129/127	0.43	31	[1.197]		130/127	0.421	30	[1.274]		131/127	0.354	31	[1.273]		129/128	0.743	31	1.113	*	130/128	0.738
626	gi|485265	proteasome 28 kDa subunit homolog, similar to Swiss-Prot Accession Number P22769 [Gallus gallus]	897	33955	31	28	9	9	37.3	8.93	2.06	Quantitation summary for protein	129/126	0.835	29	1.041	*	130/126	0.992	29	1.057		131/126	1.097	29	1.037	*	129/127	1.166	29	[1.104]		130/127	1.353	29	1.149	*	131/127	1.593	29	1.149	*	129/128	0.907	29	1.055	*	130/128	1.062
627	gi|53133830	hypothetical protein RCJMB04_20l2 [Gallus gallus]	894	64497	34	31	10	9	27.4	6.75	0.91	Quantitation summary for protein	129/126	1.284	30	1.046	*	130/126	1.126	30	[1.060]		131/126	1.214	31	[1.059]		129/127	1.126	31	1.114	*	130/127	0.957	30	[1.126]		131/127	1.098	31	[1.145]		129/128	1.262	31	[1.093]		130/128	1.08
628	gi|363729279	PREDICTED: 28S ribosomal protein S31, mitochondrial [Gallus gallus]	894	48765	31	30	8	7	20.7	8.77	1.5	Quantitation summary for protein	129/126	0.954	31	[1.113]		130/126	1.056	29	1.13	*	131/126	1.046	31	1.08	*	129/127	1.379	31	1.382	*	130/127	1.504	29	[1.453]		131/127	1.572	31	[1.477]		129/128	1.363	31	[1.241]		130/128	1.493
629	gi|363737541	PREDICTED: mannose-6-phosphate isomerase [Gallus gallus]	894	49878	21	20	4	4	9.2	5.54	0.47	Quantitation summary for protein	129/126	1.212	20	[1.039]		130/126	1.051	20	[1.064]		131/126	1.04	20	1.026	*	129/127	1.156	20	[1.152]		130/127	0.98	20	[1.153]		131/127	1.032	20	[1.143]		129/128	1.274	20	1.062	*	130/128	1.09
630	gi|4455121	osteoglycin [Gallus gallus]	893	37854	36	35	9	9	27.2	6.14	2.83	Quantitation summary for protein	129/126	0.826	36	[1.040]		130/126	0.907	34	1.042	*	131/126	0.821	36	1.032	*	129/127	0.785	36	1.08	*	130/127	0.845	35	1.076	*	131/127	0.812	36	1.078	*	129/128	0.643	36	[1.075]		130/128	0.698
631	gi|363736473	PREDICTED: uncharacterized protein LOC424374 [Gallus gallus]	891	59468	44	36	10	10	17.6	9.17	1.93	Quantitation summary for protein	129/126	0.95	35	1.173		130/126	0.823	32	1.174	*	131/126	1.115	35	1.146	*	129/127	0.922	36	[1.757]		130/127	0.8	32	[1.572]		131/127	1.125	36	[2.058]		129/128	1.25	36	[1.471]		130/128	1.076
632	gi|363736886	PREDICTED: calponin-3 [Gallus gallus]	890	42531	37	34	8	6	26.6	6.2	1.28	Quantitation summary for protein	129/126	0.856	34	[1.028]		130/126	0.73	34	1.045	*	131/126	0.843	34	1.021	*	129/127	0.789	34	[1.113]		130/127	0.657	34	[1.094]		131/127	0.809	34	1.102	*	129/128	1.052	34	1.071	*	130/128	0.884
633	gi|381342486	40S ribosomal protein S10 [Gallus gallus]	889	22106	51	42	10	8	46.1	10.15	3.73	Quantitation summary for protein	129/126	0.947	43	[1.034]		130/126	1.126	43	[1.043]		131/126	0.927	43	1.027	*	129/127	0.941	43	[1.211]		130/127	1.093	43	[1.227]		131/127	0.958	43	[1.197]		129/128	0.886	43	[1.105]		130/128	1.039
634	gi|378523913	RecName: Full=NAD-dependent protein deacylase sirtuin-5, mitochondrial; AltName: Full=Regulatory protein SIR2 homolog 5; Flags: Precursor	888	38285	32	29	9	8	26.5	7.16	1.29	Quantitation summary for protein	129/126	1.01	30	1.039		130/126	1.151	30	1.067	*	131/126	1.017	30	1.05		129/127	0.938	30	[1.115]		130/127	1.045	30	1.118	*	131/127	0.983	30	[1.148]		129/128	0.898	30	[1.080]		130/128	1.01
635	gi|50732203	PREDICTED: serine/threonine-protein kinase OSR1 [Gallus gallus]	888	68275	29	21	9	7	18.9	5.97	0.53	Quantitation summary for protein	129/126	1.126	23	1.071	*	130/126	1.191	23	1.065	*	131/126	1.117	23	1.056	*	129/127	0.99	22	1.23		130/127	1.014	22	1.273		131/127	1	22	1.292		129/128	1.253	23	1.138	*	130/128	1.307
636	gi|294861490	fascin 1 [Gallus gallus]	887	62384	39	34	13	13	32	6.8	1.39	Quantitation summary for protein	129/126	1.032	36	1.044	*	130/126	1.019	36	[1.085]		131/126	1.183	36	1.04	*	129/127	1.286	35	1.127	*	130/127	1.221	36	[1.185]		131/127	1.508	36	1.176	*	129/128	1.214	36	1.063	*	130/128	1.182
637	gi|118086389	PREDICTED: adenylyl cyclase-associated protein 2 [Gallus gallus]	886	61813	47	36	15	14	27.7	6.34	2.13	Quantitation summary for protein	129/126	1.206	38	[1.067]		130/126	1.084	34	1.056	*	131/126	1.267	38	[1.078]		129/127	0.994	36	[1.268]		130/127	0.887	34	[1.284]		131/127	1.086	36	[1.261]		129/128	1.337	38	[1.103]		130/128	1.205
638	gi|60099199	hypothetical protein RCJMB04_34d13 [Gallus gallus]	886	158623	41	33	13	10	11.8	7.53	0.3	Quantitation summary for protein	129/126	1.495	37	1.041	*	130/126	1.215	37	[1.047]		131/126	1.229	37	1.027	*	129/127	1.632	37	[1.152]		130/127	1.297	37	[1.172]		131/127	1.395	37	[1.184]		129/128	2.102	37	[1.086]		130/128	1.686
639	gi|3420175	WDR1 protein [Gallus gallus]	886	77521	43	39	13	12	23.3	6.19	1.2	Quantitation summary for protein	129/126	1.158	43	1.053	*	130/126	1.022	43	[1.086]		131/126	1.192	43	1.044	*	129/127	1.267	42	1.118	*	130/127	1.085	43	1.135	*	131/127	1.357	42	1.121	*	129/128	1.15	43	[1.059]		130/128	1.002
640	gi|313760671	ras suppressor protein 1 [Gallus gallus]	884	36603	42	37	13	12	41.9	8.48	3.75	Quantitation summary for protein	129/126	0.84	40	[1.084]		130/126	0.91	39	1.076	*	131/126	0.847	40	1.032	*	129/127	1.094	40	[1.164]		130/127	1.186	39	[1.211]		131/127	1.146	40	[1.217]		129/128	0.884	40	[1.123]		130/128	0.965
641	gi|363733172	PREDICTED: aminoacyl tRNA synthase complex-interacting multifunctional protein 1 [Gallus gallus]	882	44404	56	45	19	16	61.5	8.96	3.51	Quantitation summary for protein	129/126	0.907	47	[1.039]		130/126	0.937	47	1.04	*	131/126	1.052	47	[1.034]		129/127	0.77	47	1.137	*	130/127	0.778	47	[1.151]		131/127	0.929	47	[1.159]		129/128	0.869	47	[1.068]		130/128	0.886
642	gi|50761690	PREDICTED: 28S ribosomal protein S27, mitochondrial [Gallus gallus]	881	54960	32	28	13	12	39.8	5.84	1.26	Quantitation summary for protein	129/126	1.232	29	1.053	*	130/126	1.109	28	1.041	*	131/126	1.182	29	1.052	*	129/127	1.73	29	1.147	*	130/127	1.525	29	1.162	*	131/127	1.727	29	1.179	*	129/128	1.528	29	1.091	*	130/128	1.359
643	gi|347361001	vesicle-fusing ATPase [Gallus gallus]	871	96158	33	30	9	7	12.2	6.38	0.4	Quantitation summary for protein	129/126	1.05	31	1.026	*	130/126	1.027	31	[1.041]		131/126	1.179	31	1.021	*	129/127	1.003	31	1.087		130/127	0.959	31	1.108	*	131/127	1.172	31	1.112	*	129/128	1.252	31	[1.052]		130/128	1.207
644	gi|473701	Iron responsive element binding protein [Gallus gallus]	870	111472	43	34	17	15	20.6	6.95	0.78	Quantitation summary for protein	129/126	1.242	37	1.06	*	130/126	1.183	34	[1.060]		131/126	1.194	37	[1.041]		129/127	1.682	37	1.201	*	130/127	1.579	34	1.222	*	131/127	1.681	37	1.201	*	129/128	1.533	37	1.099	*	130/128	1.443
645	gi|310772257	cytochrome c oxidase subunit 6C [Gallus gallus]	869	10676	55	39	7	5	62.3	10.08	15.6	Quantitation summary for protein	129/126	1.158	47	1.058	*	130/126	1.253	46	[1.060]		131/126	1.078	47	1.055	*	129/127	0.893	47	[1.129]		130/127	0.942	46	[1.174]		131/127	0.864	47	[1.149]		129/128	0.917	47	[1.072]		130/128	0.978
646	gi|53134115	hypothetical protein RCJMB04_22k15 [Gallus gallus]	868	62021	60	46	15	13	31.3	6.51	1.28	Quantitation summary for protein	129/126	1.222	50	[1.036]		130/126	1.188	50	[1.051]		131/126	1.236	50	[1.025]		129/127	0.969	50	1.101	*	130/127	0.92	50	[1.143]		131/127	1.019	50	[1.132]		129/128	1.2	50	[1.064]		130/128	1.15
647	gi|118085037	PREDICTED: mitochondrial intermediate peptidase [Gallus gallus]	868	88318	44	35	13	13	18.3	5.97	0.79	Quantitation summary for protein	129/126	1.31	43	[1.058]		130/126	1.174	43	1.043	*	131/126	1.168	43	1.025	*	129/127	1.34	43	[1.086]		130/127	1.174	43	[1.094]		131/127	1.242	43	1.084	*	129/128	1.545	43	[1.084]		130/128	1.365
648	gi|363737146	PREDICTED: UDP-glucose:glycoprotein glucosyltransferase 1 [Gallus gallus]	867	198409	39	32	17	15	14.8	5.32	0.28	Quantitation summary for protein	129/126	1.182	34	1.044	*	130/126	0.997	33	[1.069]		131/126	1.089	34	[1.035]		129/127	0.995	35	[1.159]		130/127	0.823	33	1.121	*	131/127	0.954	35	1.166		129/128	1.012	34	[1.085]		130/128	0.842
649	gi|363730964	PREDICTED: aspartyl/asparaginyl beta-hydroxylase [Gallus gallus]	867	99491	49	42	16	13	26.1	4.78	0.73	Quantitation summary for protein	129/126	1.227	44	[1.054]		130/126	1.048	43	[1.059]		131/126	1.17	44	[1.026]		129/127	1.17	44	[1.076]		130/127	0.977	43	[1.109]		131/127	1.159	44	[1.102]		129/128	1.417	43	[1.052]		130/128	1.194
650	gi|53132198	hypothetical protein RCJMB04_13a8 [Gallus gallus]	866	23462	60	45	9	9	29	9.16	8.69	Quantitation summary for protein	129/126	1.094	53	[1.128]		130/126	1.228	53	[1.057]		131/126	0.935	53	[1.052]		129/127	0.998	53	[1.283]		130/127	1.095	53	[1.379]		131/127	0.887	53	[1.398]		129/128	1.189	53	[1.187]		130/128	1.316
651	gi|363746971	PREDICTED: nuclear calmodulin-binding protein, partial [Gallus gallus]	866	19291	36	29	11	10	62	9.19	7.08	Quantitation summary for protein	129/126	1.138	2	1.019		130/126	1.44	2	1.034	*	131/126	1.475	2	1.263		129/127	1.124	2	1.895		130/127	1.391	2	1.998		131/127	1.516	2	2.44		129/128	1.589	2	1.591		130/128	1.983
652	gi|53130724	hypothetical protein RCJMB04_9l5 [Gallus gallus]	864	28315	27	25	6	6	29	6.43	1.72	Quantitation summary for protein	129/126	0.984	26	1.033	*	130/126	1.019	25	1.038	*	131/126	0.963	25	1.028	*	129/127	1.184	26	1.104	*	130/127	1.199	25	1.105	*	131/127	1.191	25	1.087	*	129/128	0.857	26	[1.043]		130/128	0.875
653	gi|53130812	hypothetical protein RCJMB04_10e3 [Gallus gallus]	863	31132	33	30	6	5	22.4	11.35	1.25	Quantitation summary for protein	129/126	1.355	29	1.035	*	130/126	1.064	30	1.047	*	131/126	1.408	30	1.047	*	129/127	0.926	30	[1.108]		130/127	0.676	30	[1.138]		131/127	0.952	30	[1.143]		129/128	1.255	30	[1.090]		130/128	0.925
654	gi|60098743	hypothetical protein RCJMB04_7k22 [Gallus gallus]	862	75107	36	33	15	12	29.1	8.42	0.82	Quantitation summary for protein	129/126	0.951	35	1.03	*	130/126	0.948	35	1.052	*	131/126	0.972	35	[1.037]		129/127	0.74	35	[1.179]		130/127	0.721	35	[1.176]		131/127	0.787	35	[1.178]		129/128	0.893	35	[1.068]		130/128	0.878
655	gi|118088308	PREDICTED: plasminogen [Gallus gallus]	860	106046	52	44	22	18	22.6	7.92	1.07	Quantitation summary for protein	129/126	0.632	49	[1.056]		130/126	0.791	49	1.075	*	131/126	0.544	49	1.05	*	129/127	0.728	49	[1.118]		130/127	0.891	49	[1.148]		131/127	0.653	49	[1.142]		129/128	0.639	49	[1.066]		130/128	0.789
656	gi|53130462	hypothetical protein RCJMB04_7p19 [Gallus gallus]	860	44158	29	28	10	9	34.8	4.98	1.21	Quantitation summary for protein	129/126	0.998	28	[1.040]		130/126	1.018	28	[1.050]		131/126	1.15	28	[1.044]		129/127	1.068	28	[1.189]		130/127	1.065	28	[1.217]		131/127	1.28	28	[1.189]		129/128	1.006	28	1.052		130/128	1.013
657	gi|53133328	hypothetical protein RCJMB04_15i11 [Gallus gallus]	859	52541	28	23	11	9	33.3	5.66	1.21	Quantitation summary for protein	129/126	1.256	23	1.073	*	130/126	1.067	23	[1.059]		131/126	1.116	23	1.056	*	129/127	1.196	23	1.198	*	130/127	0.993	23	1.173		131/127	1.106	23	1.198	*	129/128	1.189	23	1.11	*	130/128	0.996
658	gi|53130942	hypothetical protein RCJMB04_11a4 [Gallus gallus]	859	22536	22	19	6	6	54.4	6.81	2.03	Quantitation summary for protein	129/126	1.026	20	1.074		130/126	0.991	20	1.07		131/126	1.109	20	1.065	*	129/127	1.29	20	1.246	*	130/127	1.217	20	[1.306]		131/127	1.45	20	[1.328]		129/128	1.026	20	1.121		130/128	0.978
659	gi|357593606	methylglutaconyl-CoA hydratase, mitochondrial isoform 1 [Gallus gallus]	858	39476	46	36	15	11	39.9	9.26	2.62	Quantitation summary for protein	129/126	0.979	39	[1.057]		130/126	1.012	38	[1.062]		131/126	0.997	39	1.042		129/127	1.086	39	1.176	*	130/127	1.096	38	1.213	*	131/127	1.15	39	1.206	*	129/128	1.06	39	1.112	*	130/128	1.08
660	gi|53132262	hypothetical protein RCJMB04_13b18 [Gallus gallus]	858	37219	35	30	13	10	38.6	9.58	1.78	Quantitation summary for protein	129/126	1.087	31	1.083	*	130/126	1.147	31	[1.067]		131/126	1.114	31	[1.061]		129/127	1.223	31	1.161	*	130/127	1.261	31	1.219	*	131/127	1.304	31	[1.232]		129/128	1.133	31	1.08	*	130/128	1.179
661	gi|363735659	PREDICTED: sorbin and SH3 domain-containing protein 1 [Gallus gallus]	856	172960	41	33	18	14	20	6.38	0.45	Quantitation summary for protein	129/126	0.778	35	[1.052]		130/126	0.658	29	1.075	*	131/126	0.913	35	1.043	*	129/127	0.99	35	1.107		130/127	0.912	30	1.103	*	131/127	1.208	35	1.146	*	129/128	1.149	35	1.076	*	130/128	1.062
662	gi|53128405	hypothetical protein RCJMB04_4n15 [Gallus gallus]	856	111905	57	43	20	16	22.9	5.14	0.68	Quantitation summary for protein	129/126	1.295	48	[1.045]		130/126	1.181	48	1.043	*	131/126	1.41	48	[1.036]		129/127	1.978	48	[1.097]		130/127	1.764	48	[1.104]		131/127	2.239	48	[1.119]		129/128	1.892	48	[1.063]		130/128	1.702
663	gi|53136600	hypothetical protein RCJMB04_31h10 [Gallus gallus]	855	46164	38	36	10	10	31.9	4.7	1.14	Quantitation summary for protein	129/126	1.077	38	[1.045]		130/126	1.047	38	[1.078]		131/126	1.131	38	[1.038]		129/127	0.671	38	1.087	*	130/127	0.637	38	1.093	*	131/127	0.733	38	1.094	*	129/128	0.922	38	[1.049]		130/128	0.884
664	gi|53130584	hypothetical protein RCJMB04_8n6 [Gallus gallus]	854	51535	45	35	14	13	39.1	6.74	2.25	Quantitation summary for protein	129/126	1.191	35	[1.077]		130/126	1.159	32	1.048	*	131/126	1.3	35	1.048	*	129/127	0.777	36	1.133	*	130/127	0.825	30	1.11	*	131/127	0.881	36	1.202	*	129/128	1.102	36	1.082	*	130/128	1.076
665	gi|363738482	PREDICTED: inter-alpha-trypsin inhibitor heavy chain H3 [Gallus gallus]	854	116604	42	31	15	12	16	5.85	0.69	Quantitation summary for protein	129/126	0.819	27	1.14	*	130/126	1.094	28	1.115	*	131/126	0.601	28	1.17	*	129/127	0.636	28	[1.386]		130/127	0.881	28	[1.519]		131/127	0.515	28	1.387	*	129/128	0.667	28	1.185	*	130/128	0.933
666	gi|53131756	hypothetical protein RCJMB04_12c19 [Gallus gallus]	854	91919	53	42	17	13	28.5	7.51	1.16	Quantitation summary for protein	129/126	1.252	47	1.053	*	130/126	0.921	45	1.048	*	131/126	0.961	47	[1.046]		129/127	1.026	47	[1.095]		130/127	0.737	46	1.11	*	131/127	0.819	47	[1.106]		129/128	1.026	47	1.075	*	130/128	0.743
667	gi|53127294	hypothetical protein RCJMB04_1l5 [Gallus gallus]	853	30449	51	44	12	11	42.8	6.46	2.85	Quantitation summary for protein	129/126	0.668	45	[1.103]		130/126	0.781	45	1.091	*	131/126	0.896	45	[1.078]		129/127	0.707	45	[1.228]		130/127	0.807	45	[1.294]		131/127	0.986	45	1.357		129/128	0.73	45	1.106	*	130/128	0.838
668	gi|363745941	PREDICTED: prefoldin subunit 5-like [Gallus gallus]	850	21201	32	26	8	7	56.1	5.9	4.04	Quantitation summary for protein	129/126	0.892	28	[1.056]		130/126	0.939	27	[1.052]		131/126	1.058	28	1.041	*	129/127	1.107	28	1.163	*	130/127	1.141	27	1.172	*	131/127	1.365	28	[1.165]		129/128	0.887	28	[1.085]		130/128	0.92
669	gi|363739865	PREDICTED: iron-sulfur cluster assembly enzyme ISCU, mitochondrial [Gallus gallus]	848	21015	40	33	7	7	40.5	9.03	4.12	Quantitation summary for protein	129/126	0.972	39	1.06	*	130/126	1.006	39	1.042		131/126	0.974	39	1.035	*	129/127	1.29	39	[1.144]		130/127	1.305	39	[1.171]		131/127	1.345	39	[1.184]		129/128	1.069	39	1.072	*	130/128	1.092
670	gi|516684	unnamed protein product [Gallus gallus]	847	30396	46	41	12	10	44.1	11.75	5.47	Quantitation summary for protein	129/126	1.124	44	1.065	*	130/126	0.948	44	[1.132]		131/126	1.178	44	1.056	*	129/127	1.189	44	1.175	*	130/127	0.979	44	1.183		131/127	1.296	44	[1.212]		129/128	1.276	44	[1.104]		130/128	1.061
671	gi|363740062	PREDICTED: glutamyl-tRNA(Gln) amidotransferase subunit C, mitochondrial [Gallus gallus]	846	16771	25	21	5	3	39.3	4.74	1.51	Quantitation summary for protein	129/126	0.745	24	[1.064]		130/126	0.981	24	[1.067]		131/126	0.973	24	1.037	*	129/127	0.702	24	[1.199]		130/127	0.903	24	[1.284]		131/127	0.953	24	[1.248]		129/128	1.075	24	1.095	*	130/128	1.395
672	gi|50760631	PREDICTED: glycylpeptide N-tetradecanoyltransferase 1 [Gallus gallus]	845	67255	32	30	12	10	23	8.72	0.86	Quantitation summary for protein	129/126	1.004	20	1.074		130/126	0.928	19	1.062	*	131/126	1.192	20	1.055	*	129/127	0.993	20	[1.203]		130/127	0.903	19	[1.171]		131/127	1.226	20	[1.201]		129/128	1.293	20	1.157	*	130/128	1.183
673	gi|363733864	PREDICTED: pentatricopeptide repeat-containing protein 3, mitochondrial [Gallus gallus]	842	87609	34	29	14	13	21.6	5.65	0.8	Quantitation summary for protein	129/126	1.165	32	[1.074]		130/126	1.093	31	[1.060]		131/126	1.169	32	[1.039]		129/127	1.13	32	1.193	*	130/127	1.036	31	1.215		131/127	1.01	27	1.14		129/128	1.368	32	1.117	*	130/128	1.267
674	gi|363735855	PREDICTED: heterogeneous nuclear ribonucleoprotein A3 homolog 1-like [Gallus gallus]	842	46733	35	33	6	6	16.8	9.24	0.73	Quantitation summary for protein	129/126	0.619	28	1.12	*	130/126	0.978	27	1.061		131/126	1.208	28	1.08	*	129/127	1.645	28	1.239	*	130/127	2.554	27	1.284	*	131/127	3.337	28	1.343	*	129/128	1.662	28	1.143	*	130/128	2.599
675	gi|363728313	PREDICTED: coiled-coil domain-containing protein 58 [Gallus gallus]	840	19895	30	25	6	6	43.1	7.67	2.5	Quantitation summary for protein	129/126	0.695	30	1.038	*	130/126	0.836	30	1.034	*	131/126	0.751	30	[1.029]		129/127	0.946	30	[1.171]		130/127	1.114	30	[1.172]		131/127	1.065	30	[1.179]		129/128	0.686	30	[1.073]		130/128	0.815
676	gi|3132623	heparin cofactor II [Gallus gallus]	840	61696	35	29	10	10	22.8	5.9	0.86	Quantitation summary for protein	129/126	0.835	34	1.045	*	130/126	0.945	34	1.044	*	131/126	0.599	33	1.066	*	129/127	1.216	34	[1.109]		130/127	1.345	34	1.105	*	131/127	0.897	34	1.084	*	129/128	0.729	34	1.051	*	130/128	0.813
677	gi|1536800	immunoglobulin lambda chain variable region [Gallus gallus]	838	12139	33	26	2	2	38.1	6.78	2.49	Quantitation summary for protein	129/126	---	0	---		130/126	---	0	---		131/126	---	0	---		129/127	---	0	---		130/127	---	0	---		131/127	---	0	---		129/128	---	0	---		130/128	---
678	gi|50728940	PREDICTED: acylglycerol kinase, mitochondrial [Gallus gallus]	837	55252	35	31	13	10	24.1	8.38	1.38	Quantitation summary for protein	129/126	1.387	32	1.042	*	130/126	1.188	32	[1.059]		131/126	1.183	31	1.027	*	129/127	1.861	31	1.087	*	130/127	1.566	31	1.107	*	131/127	1.651	31	1.097	*	129/128	1.451	32	[1.073]		130/128	1.226
679	gi|1098910	nebulette, partial [Gallus gallus]	835	54505	36	33	14	14	38.2	8.9	1.27	Quantitation summary for protein	129/126	0.919	34	1.024	*	130/126	1.024	34	1.024	*	131/126	0.865	34	1.017	*	129/127	0.545	34	[1.092]		130/127	0.594	34	[1.091]		131/127	0.533	34	[1.088]		129/128	0.924	34	1.062	*	130/128	1.031
680	gi|118104137	PREDICTED: ubiquilin-1 isoform 2 [Gallus gallus]	835	65122	32	27	11	10	22.4	5.15	0.8	Quantitation summary for protein	129/126	0.902	18	1.148	*	130/126	0.959	14	1.22		131/126	1.082	18	[1.195]		129/127	0.707	18	1.257	*	130/127	0.733	14	1.349	*	131/127	0.879	20	1.307	*	129/128	0.806	17	1.152	*	130/128	0.845
681	gi|50755345	PREDICTED: NADH dehydrogenase [ubiquinone] 1 beta subcomplex subunit 6 [Gallus gallus]	833	16283	34	30	8	8	53.9	9.74	5.6	Quantitation summary for protein	129/126	0.991	34	1.068		130/126	1.406	34	[1.087]		131/126	1.008	34	[1.050]		129/127	1.237	34	1.131	*	130/127	1.714	34	1.151	*	131/127	1.308	34	[1.175]		129/128	0.834	34	1.096	*	130/128	1.167
682	gi|53129801	hypothetical protein RCJMB04_6c17 [Gallus gallus]	832	56911	48	33	13	11	31.5	7.11	1.91	Quantitation summary for protein	129/126	1.022	28	[1.100]		130/126	1.013	28	1.064		131/126	1.233	28	1.081	*	129/127	1.382	27	1.215	*	130/127	1.296	28	1.348	*	131/127	1.679	28	1.399	*	129/128	1.162	28	1.139	*	130/128	1.136
683	gi|118097358	PREDICTED: sideroflexin-1 [Gallus gallus]	832	38917	29	27	6	6	19.9	9.24	1.26	Quantitation summary for protein	129/126	1.211	28	1.039	*	130/126	1.188	28	1.077	*	131/126	0.999	28	1.036		129/127	0.94	28	1.074	*	130/127	0.918	27	1.065	*	131/127	0.807	28	[1.085]		129/128	0.999	28	[1.049]		130/128	0.968
684	gi|363732056	PREDICTED: laminin subunit alpha-4 [Gallus gallus]	830	230913	41	34	21	18	13.2	5.99	0.31	Quantitation summary for protein	129/126	0.836	35	[1.054]		130/126	0.839	34	[1.041]		131/126	1.022	35	1.031	*	129/127	1.037	35	1.114		130/127	1.018	34	1.134		131/127	1.319	35	1.148	*	129/128	1.082	35	1.044	*	130/128	1.071
685	gi|63765	ras-like protein [Gallus gallus]	829	28937	36	31	8	7	31.9	7.7	2.31	Quantitation summary for protein	129/126	1.134	33	[1.103]		130/126	1.194	33	1.098	*	131/126	1.185	33	1.047	*	129/127	0.944	33	[1.247]		130/127	0.971	33	[1.289]		131/127	1.026	33	[1.352]		129/128	0.794	33	[1.178]		130/128	0.824
686	gi|118101365	PREDICTED: proline synthase co-transcribed bacterial homolog protein [Gallus gallus]	829	35265	33	27	10	10	37.3	8.35	2.21	Quantitation summary for protein	129/126	0.832	30	[1.064]		130/126	0.893	30	1.063	*	131/126	0.911	30	1.049	*	129/127	0.62	30	[1.379]		130/127	0.651	30	[1.378]		131/127	0.706	30	1.35	*	129/128	0.818	30	1.123	*	130/128	0.866
687	gi|53128989	hypothetical protein RCJMB04_5f14 [Gallus gallus]	828	24189	56	43	14	11	72.7	8.09	9.28	Quantitation summary for protein	129/126	0.753	43	1.06	*	130/126	1.046	40	[1.067]		131/126	1.147	43	[1.047]		129/127	1.159	44	1.088	*	130/127	1.575	41	1.15	*	131/127	1.837	44	[1.148]		129/128	1.171	43	1.062	*	130/128	1.606
688	gi|118088772	PREDICTED: hexaprenyldihydroxybenzoate methyltransferase, mitochondrial [Gallus gallus]	827	41178	24	20	7	7	23.3	5.7	1	Quantitation summary for protein	129/126	1.011	22	[1.141]		130/126	0.942	22	[1.109]		131/126	0.958	22	1.129		129/127	0.919	22	1.272		130/127	0.837	22	1.29	*	131/127	0.906	22	1.302		129/128	0.961	21	1.161		130/128	0.854
689	gi|53133428	hypothetical protein RCJMB04_16h16 [Gallus gallus]	827	41487	33	30	9	9	29.2	4.63	1.32	Quantitation summary for protein	129/126	0.997	30	[1.067]		130/126	0.976	29	[1.084]		131/126	1.006	31	[1.072]		129/127	0.75	30	1.198	*	130/127	0.719	29	1.201	*	131/127	0.788	31	1.233	*	129/128	0.902	30	[1.154]		130/128	0.872
690	gi|363731779	PREDICTED: cytochrome c oxidase subunit 7A-related protein, mitochondrial [Gallus gallus]	821	14954	20	19	4	3	32.8	9.72	1.27	Quantitation summary for protein	129/126	1.166	18	1.046	*	130/126	1.15	19	1.038	*	131/126	0.834	19	[1.050]		129/127	1.269	19	[1.120]		130/127	1.252	19	[1.142]		131/127	0.967	19	[1.159]		129/128	0.818	19	[1.058]		130/128	0.815
691	gi|53136516	hypothetical protein RCJMB04_30d2 [Gallus gallus]	819	26135	20	20	2	2	10.7	9.68	0.44	Quantitation summary for protein	129/126	1.173	20	1.036	*	130/126	0.992	20	[1.067]		131/126	1.297	19	1.031	*	129/127	0.989	20	1.083		130/127	0.871	19	1.089	*	131/127	1.127	20	1.099	*	129/128	1.043	20	1.054	*	130/128	0.87
692	gi|363746086	PREDICTED: apolipoprotein A-I-binding protein, partial [Gallus gallus]	818	14772	27	25	4	4	44	7.03	3.27	Quantitation summary for protein	129/126	0.954	27	1.064	*	130/126	0.84	25	1.091	*	131/126	0.862	27	1.059	*	129/127	1.566	27	[1.186]		130/127	1.349	25	1.173	*	131/127	1.47	27	[1.147]		129/128	1.125	27	1.075	*	130/128	0.977
693	gi|363738196	PREDICTED: synaptic vesicle membrane protein VAT-1 homolog-like [Gallus gallus]	817	53671	33	29	15	12	38.8	5.03	1.04	Quantitation summary for protein	129/126	0.879	30	[1.092]		130/126	0.805	30	[1.040]		131/126	0.801	30	[1.058]		129/127	1.455	30	1.145	*	130/127	1.302	30	[1.176]		131/127	1.378	30	[1.201]		129/128	1.306	30	[1.129]		130/128	1.179
694	gi|71564542	soluble epoxide hydrolase [Gallus gallus]	815	67618	53	43	15	14	29.5	5.89	1.35	Quantitation summary for protein	129/126	1.501	47	1.059	*	130/126	1.346	45	[1.161]		131/126	1.163	47	1.038	*	129/127	1.465	47	[1.214]		130/127	1.289	45	1.178	*	131/127	1.181	47	[1.214]		129/128	1.564	47	1.099	*	130/128	1.384
695	gi|50736242	PREDICTED: acyl-coenzyme A thioesterase 13 [Gallus gallus]	814	18054	59	49	10	8	56.6	9.07	8.24	Quantitation summary for protein	129/126	0.825	51	[1.045]		130/126	0.905	50	[1.042]		131/126	0.812	51	1.035	*	129/127	0.875	51	[1.248]		130/127	0.936	50	[1.253]		131/127	0.896	51	[1.260]		129/128	0.818	51	[1.105]		130/128	0.885
696	gi|348167222	beta-actin [Gallus gallus]	812	17664	43	24	5	4	42.1	5.04	1.4	Quantitation summary for protein	129/126	---	0	---		130/126	---	0	---		131/126	---	0	---		129/127	---	0	---		130/127	---	0	---		131/127	---	0	---		129/128	---	0	---		130/128	---
697	gi|363729624	PREDICTED: extended synaptotagmin-2 [Gallus gallus]	808	97939	29	26	14	12	24.7	7.71	0.64	Quantitation summary for protein	129/126	1.269	26	[1.077]		130/126	1.2	23	1.052	*	131/126	1.138	26	[1.056]		129/127	0.908	25	1.102	*	130/127	0.851	25	1.144	*	131/127	0.842	26	1.14	*	129/128	1.152	26	[1.063]		130/128	1.062
698	gi|95931861	PACSIN 3 [Gallus gallus]	806	61193	40	31	17	13	44.6	5.71	1.44	Quantitation summary for protein	129/126	0.981	37	[1.049]		130/126	0.892	37	[1.065]		131/126	1.023	37	[1.034]		129/127	1.881	37	1.13	*	130/127	1.694	36	1.102	*	131/127	2.042	37	1.157	*	129/128	1.491	37	1.094	*	130/128	1.337
699	gi|53136880	hypothetical protein RCJMB04_35g11 [Gallus gallus]	806	61605	27	24	7	6	17.5	6.33	0.87	Quantitation summary for protein	129/126	0.936	24	1.09	*	130/126	1.398	24	1.098	*	131/126	0.867	25	[1.103]		129/127	0.227	24	[1.518]		130/127	0.331	24	1.467	*	131/127	0.221	25	[1.481]		129/128	0.632	24	[1.161]		130/128	0.93
700	gi|53133416	hypothetical protein RCJMB04_16g4 [Gallus gallus]	805	64484	53	35	21	16	40.4	6.07	1.57	Quantitation summary for protein	129/126	1.29	46	[1.037]		130/126	1.235	46	1.038	*	131/126	1.41	46	[1.031]		129/127	1.68	46	[1.153]		130/127	1.571	46	[1.175]		131/127	1.91	46	[1.186]		129/128	1.517	46	[1.105]		130/128	1.432
701	gi|118102980	PREDICTED: keratin, type I cytoskeletal 12 [Gallus gallus]	805	60322	36	29	5	4	5.7	4.86	0.89	Quantitation summary for protein	129/126	1.199	19	1.071	*	130/126	1.595	17	1.028	*	131/126	0.875	19	1.044	*	129/127	2.374	19	1.167	*	130/127	3.16	19	[1.239]		131/127	1.803	19	1.237	*	129/128	1.176	19	1.056	*	130/128	1.58
702	gi|363739604	PREDICTED: acyl carrier protein, mitochondrial [Gallus gallus]	804	18827	57	43	8	7	28.7	5.13	7.47	Quantitation summary for protein	129/126	0.645	44	[1.189]		130/126	0.799	44	[1.068]		131/126	0.742	44	[1.125]		129/127	0.892	43	1.225	*	130/127	1.075	43	[1.406]		131/127	1.064	43	[1.472]		129/128	0.754	44	[1.214]		130/128	0.921
703	gi|118093867	PREDICTED: histamine N-methyltransferase [Gallus gallus]	803	37964	31	30	6	6	23.3	5.57	0.8	Quantitation summary for protein	129/126	1.402	31	1.059	*	130/126	1.693	31	1.043	*	131/126	1.202	31	1.05	*	129/127	1.187	31	1.046	*	130/127	1.4	31	1.065	*	131/127	1.058	31	1.054	*	129/128	0.875	31	1.04	*	130/128	1.042
704	gi|28375613	damaged-DNA binding protein DDB p127 subunit [Gallus gallus]	803	140790	43	38	16	15	14	5.15	0.48	Quantitation summary for protein	129/126	1	40	1.039		130/126	1.087	39	1.044	*	131/126	1.171	40	[1.030]		129/127	1.705	40	1.183	*	130/127	1.816	39	[1.189]		131/127	2.076	40	[1.226]		129/128	1.553	40	1.103	*	130/128	1.668
705	gi|118092623	PREDICTED: inorganic pyrophosphatase [Gallus gallus]	802	39317	43	33	14	11	46.6	5.53	2.1	Quantitation summary for protein	129/126	1.059	32	1.103	*	130/126	1.055	32	1.093	*	131/126	1.192	32	1.106	*	129/127	1.385	32	1.198	*	130/127	1.349	32	[1.266]		131/127	1.622	32	1.286	*	129/128	1.146	32	1.128	*	130/128	1.127
706	gi|460417283	uncharacterized oxidoreductase-like isoform 2 [Gallus gallus]	801	27223	33	30	9	9	47.1	9.2	3.01	Quantitation summary for protein	129/126	1.115	26	1.044	*	130/126	1.143	24	1.04	*	131/126	1.104	26	1.036	*	129/127	1.225	26	[1.092]		130/127	1.217	25	[1.122]		131/127	1.262	26	[1.133]		129/128	1.013	22	1.041		130/128	1.096
707	gi|1127800	CDC42 [Gallus gallus]	800	25726	30	29	7	6	37.2	6.15	2.82	Quantitation summary for protein	129/126	1.256	28	[1.203]		130/126	1.101	22	[1.167]		131/126	1.118	26	1.124	*	129/127	0.942	29	[1.461]		130/127	0.815	22	1.449	*	131/127	0.872	29	1.488		129/128	0.928	29	[1.312]		130/128	0.808
708	gi|14017756	chick atrial myosin heavy chain [Gallus gallus]	798	267035	60	40	18	12	8	5.6	0.27	Quantitation summary for protein	129/126	1.328	5	1.107	*	130/126	1.115	5	1.075	*	131/126	1.308	5	1.105	*	129/127	1.32	4	1.098	*	130/127	1.048	5	1.27		131/127	1.308	5	1.302		129/128	1.771	5	1.262	*	130/128	1.468
709	gi|118096224	PREDICTED: pyruvate dehydrogenase phosphatase regulatory subunit, mitochondrial [Gallus gallus]	797	109274	32	23	15	12	20.8	6.04	0.65	Quantitation summary for protein	129/126	1.185	29	1.028	*	130/126	1.208	29	1.056	*	131/126	1.206	29	1.035	*	129/127	1.142	29	1.102	*	130/127	1.34	27	1.087	*	131/127	1.209	29	1.115	*	129/128	1.254	29	1.062	*	130/128	1.261
710	gi|135824	RecName: Full=Thiosulfate sulfurtransferase; AltName: Full=Rhodanese	795	37078	58	36	10	6	21.5	6.56	2.04	Quantitation summary for protein	129/126	1.087	8	[1.098]		130/126	1.084	8	[1.147]		131/126	0.71	8	1.091	*	129/127	1.033	7	1.135		130/127	1.506	8	1.164	*	131/127	1.05	8	1.313		129/128	0.579	8	1.28	*	130/128	0.57
711	gi|60099211	hypothetical protein RCJMB04_34k10 [Gallus gallus]	795	37736	19	19	2	2	8.5	8.79	0.4	Quantitation summary for protein	129/126	1.477	19	1.064	*	130/126	1.216	19	1.059	*	131/126	1.22	18	1.034	*	129/127	0.834	19	[1.084]		130/127	0.671	19	1.11	*	131/127	0.713	19	[1.065]		129/128	1.293	19	1.07	*	130/128	1.049
712	gi|53136582	hypothetical protein RCJMB04_31d24 [Gallus gallus]	794	40045	43	32	12	8	38.4	7.68	2.04	Quantitation summary for protein	129/126	0.693	39	[1.056]		130/126	0.953	35	[1.050]		131/126	0.917	39	[1.040]		129/127	0.695	39	1.122	*	130/127	0.944	35	1.166	*	131/127	0.957	39	1.186		129/128	0.756	38	1.058	*	130/128	1.027
713	gi|1915894	tom-1B protein [Gallus gallus]	794	62258	24	24	7	7	18.6	5.08	0.43	Quantitation summary for protein	129/126	1.209	14	1.043	*	130/126	1.104	14	1.056	*	131/126	1.147	13	1.023	*	129/127	0.731	14	1.05	*	130/127	0.653	14	1.053	*	131/127	0.711	14	[1.076]		129/128	1.13	13	1.036	*	130/128	1.039
714	gi|363744693	PREDICTED: leucyl-cystinyl aminopeptidase [Gallus gallus]	794	133883	31	23	9	8	9.2	5.29	0.3	Quantitation summary for protein	129/126	1.221	30	[1.037]		130/126	1.033	29	1.056	*	131/126	1.184	30	[1.038]		129/127	1.525	30	1.122	*	130/127	1.268	29	1.15	*	131/127	1.538	30	1.139	*	129/128	1.391	30	1.062	*	130/128	1.163
715	gi|3915686	RecName: Full=Farnesyl pyrophosphate synthase; Short=FPP synthase; Short=FPS; AltName: Full=(2E,6E)-farnesyl diphosphate synthase; AltName: Full=Dimethylallyltranstransferase; AltName: Full=Farnesyl diphosphate synthase; AltName: Full=Geranyltranstr	794	48770	43	39	14	11	38.4	6.16	1.34	Quantitation summary for protein	129/126	1.228	39	1.034	*	130/126	1.096	39	1.048	*	131/126	1.387	39	[1.040]		129/127	0.865	39	[1.143]		130/127	0.755	39	1.148	*	131/127	1.017	39	[1.187]		129/128	1.149	39	[1.068]		130/128	1.011
716	gi|53130754	hypothetical protein RCJMB04_9n22 [Gallus gallus]	794	22375	46	33	9	5	57.8	8.68	2.5	Quantitation summary for protein	129/126	0.947	34	[1.036]		130/126	0.994	34	1.04		131/126	1.133	35	[1.060]		129/127	1.901	34	[1.141]		130/127	1.952	34	1.138	*	131/127	2.375	34	[1.173]		129/128	1.194	34	1.084	*	130/128	1.237
717	gi|121077	RecName: Full=Glycine cleavage system H protein, mitochondrial; Flags: Precursor	793	20691	28	24	4	2	22.6	4.91	1.13	Quantitation summary for protein	129/126	0.735	25	1.067	*	130/126	0.76	24	1.086	*	131/126	0.732	25	1.055	*	129/127	1.16	25	[1.112]		130/127	1.165	24	1.113	*	131/127	1.201	25	[1.101]		129/128	0.585	25	[1.104]		130/128	0.598
718	gi|363737914	PREDICTED: talin-2 [Gallus gallus]	793	312829	54	43	24	19	8.5	5.39	0.3	Quantitation summary for protein	129/126	1.276	24	1.037	*	130/126	1.097	24	[1.059]		131/126	1.273	24	1.055	*	129/127	1.142	24	[1.145]		130/127	0.959	24	[1.156]		131/127	1.184	24	[1.133]		129/128	1.461	24	[1.081]		130/128	1.238
719	gi|212120	IgL, partial [Gallus gallus]	793	11409	33	25	2	2	39.2	8.01	2.73	Quantitation summary for protein	129/126	---	0	---		130/126	---	0	---		131/126	---	0	---		129/127	---	0	---		130/127	---	0	---		131/127	---	0	---		129/128	---	0	---		130/128	---
720	gi|315583005	pyruvate dehyrogenase phosphatase catalytic subunit 1 [Gallus gallus]	793	69909	28	26	11	10	22.5	6.45	0.66	Quantitation summary for protein	129/126	0.863	28	1.061	*	130/126	0.961	28	1.06	*	131/126	0.942	28	1.042	*	129/127	1.147	28	1.216	*	130/127	1.248	28	1.224	*	131/127	1.302	28	1.241	*	129/128	1.032	28	1.103		130/128	1.134
721	gi|1708877	RecName: Full=Lumican; AltName: Full=Keratan sulfate proteoglycan lumican; Short=KSPG lumican; Flags: Precursor	791	44288	42	32	12	10	35.6	6.07	2.16	Quantitation summary for protein	129/126	0.806	33	1.06	*	130/126	0.901	32	1.064	*	131/126	0.871	33	1.052	*	129/127	0.6	33	[1.239]		130/127	0.656	32	[1.244]		131/127	0.674	33	[1.240]		129/128	0.682	33	[1.118]		130/128	0.753
722	gi|118092977	PREDICTED: xaa-Pro aminopeptidase 1 [Gallus gallus]	791	79077	34	28	14	11	24.9	5.79	0.7	Quantitation summary for protein	129/126	1.451	29	1.046	*	130/126	1.23	29	[1.052]		131/126	1.199	29	1.034	*	129/127	1.815	29	[1.187]		130/127	1.504	29	[1.168]		131/127	1.56	29	[1.167]		129/128	1.68	29	[1.090]		130/128	1.405
723	gi|118091923	PREDICTED: ubiquinone biosynthesis monooxygenase COQ6 [Gallus gallus]	791	54316	32	30	5	5	12.4	6.36	0.51	Quantitation summary for protein	129/126	0.964	32	1.042	*	130/126	0.97	32	1.051	*	131/126	0.966	32	1.029	*	129/127	0.954	32	[1.093]		130/127	0.939	32	[1.104]		131/127	0.995	32	[1.104]		129/128	1.091	32	[1.064]		130/128	1.083
724	gi|63558	unnamed protein product [Gallus gallus]	791	75655	28	24	8	6	15.1	5.15	0.29	Quantitation summary for protein	129/126	0.872	22	1.066	*	130/126	0.767	22	1.09	*	131/126	0.725	22	[1.070]		129/127	0.609	22	[1.148]		130/127	0.524	22	[1.198]		131/127	0.527	22	[1.198]		129/128	1.052	22	[1.103]		130/128	0.913
725	gi|363743667	PREDICTED: protein QIL1-like [Gallus gallus]	790	13941	36	32	6	5	52.3	7.82	3.61	Quantitation summary for protein	129/126	0.965	32	1.036	*	130/126	0.965	32	[1.033]		131/126	0.938	32	1.023	*	129/127	1.51	32	[1.112]		130/127	1.476	32	[1.120]		131/127	1.526	32	[1.130]		129/128	1.094	32	1.069	*	130/128	1.079
726	gi|363738644	PREDICTED: LOW QUALITY PROTEIN: glutathione peroxidase 1-like [Gallus gallus]	789	24111	43	40	10	9	62.6	7.74	5.17	Quantitation summary for protein	129/126	0.293	35	1.175	*	130/126	0.346	30	1.166	*	131/126	0.24	40	1.148	*	129/127	0.283	36	1.129	*	130/127	0.339	30	1.134	*	131/127	0.209	41	1.157	*	129/128	0.286	36	1.139	*	130/128	0.337
727	gi|363743604	PREDICTED: heat shock protein 30C-like [Gallus gallus]	788	24164	28	25	8	7	53	5.24	1.82	Quantitation summary for protein	129/126	0.709	18	1.153	*	130/126	1.061	17	[1.150]		131/126	1.346	18	1.092	*	129/127	0.747	19	1.194	*	130/127	1.172	17	[1.341]		131/127	1.445	19	[1.336]		129/128	1.008	18	1.214		130/128	1.598
728	gi|363738588	PREDICTED: aminoacylase-1-like isoform 1 [Gallus gallus]	788	51550	33	30	10	10	29.1	5.98	1.1	Quantitation summary for protein	129/126	1.167	32	1.057	*	130/126	1.046	30	1.06	*	131/126	1.033	31	1.038	*	129/127	1.233	32	1.1	*	130/127	1.093	30	1.118	*	131/127	1.158	32	1.139	*	129/128	1.325	32	1.064	*	130/128	1.178
729	gi|60098917	hypothetical protein RCJMB04_15e19 [Gallus gallus]	785	34790	26	22	4	4	20.1	5.85	1.07	Quantitation summary for protein	129/126	0.912	26	[1.037]		130/126	1.003	25	1.064		131/126	1.132	26	[1.045]		129/127	0.68	26	1.071	*	130/127	0.731	25	1.139	*	131/127	0.877	26	[1.112]		129/128	0.879	25	1.035	*	130/128	0.953
730	gi|53131694	hypothetical protein RCJMB04_12b11 [Gallus gallus]	783	38273	27	26	6	5	25.8	4.77	0.64	Quantitation summary for protein	129/126	0.793	27	[1.064]		130/126	0.987	27	1.051		131/126	1.247	27	1.046	*	129/127	1.174	27	1.156	*	130/127	1.428	27	[1.190]		131/127	1.919	27	[1.226]		129/128	1.165	27	[1.089]		130/128	1.43
731	gi|363746230	PREDICTED: ubiquitin thioesterase OTUB1-like [Gallus gallus]	779	34020	23	21	7	6	31.5	5	1.11	Quantitation summary for protein	129/126	1.245	22	[1.062]		130/126	1.215	19	1.061	*	131/126	1.208	22	[1.056]		129/127	1.189	21	[1.333]		130/127	1.191	18	[1.372]		131/127	1.194	21	[1.367]		129/128	1.268	22	1.184	*	130/128	1.238
732	gi|118088952	PREDICTED: muscular LMNA-interacting protein [Gallus gallus]	779	48294	32	25	11	9	37.5	4.96	1.36	Quantitation summary for protein	129/126	0.476	24	1.102	*	130/126	0.566	23	[1.095]		131/126	0.84	23	1.057	*	129/127	1.711	25	1.341	*	130/127	2.039	23	[1.328]		131/127	3.083	25	[1.513]		129/128	1.731	25	1.258	*	130/128	2.057
733	gi|150416167	RecName: Full=Ubiquitin-conjugating enzyme E2 variant 1; Short=UEV-1; AltName: Full=CROC-1B	779	18730	34	30	9	8	60	7.71	5.16	Quantitation summary for protein	129/126	1.001	16	1.077		130/126	1.007	16	1.066		131/126	1.017	15	1.068		129/127	0.811	16	1.136	*	130/127	0.798	16	1.16	*	131/127	0.855	16	1.176	*	129/128	0.8	16	[1.186]		130/128	0.793
734	gi|53128300	hypothetical protein RCJMB04_4l9 [Gallus gallus]	778	63012	36	33	12	11	28.8	5.71	1.04	Quantitation summary for protein	129/126	0.84	33	[1.054]		130/126	0.938	32	1.048	*	131/126	0.916	33	1.029	*	129/127	0.932	33	1.067	*	130/127	1.027	33	[1.095]		131/127	1.056	33	[1.088]		129/128	0.893	33	[1.059]		130/128	0.992
735	gi|5705960	immunoglobulin alpha heavy chain [Gallus gallus]	777	65988	31	29	9	9	15	4.58	0.79	Quantitation summary for protein	129/126	0.663	12	1.136	*	130/126	0.978	12	[1.125]		131/126	0.61	12	1.072	*	129/127	0.54	12	1.204	*	130/127	0.779	12	1.281	*	131/127	0.517	12	1.316	*	129/128	0.87	12	1.126	*	130/128	1.266
736	gi|363731587	PREDICTED: heterogeneous nuclear ribonucleoprotein U [Gallus gallus]	777	88996	37	29	19	16	23.9	9.43	0.99	Quantitation summary for protein	129/126	0.966	33	[1.089]		130/126	1.041	33	1.085	*	131/126	1.109	33	[1.051]		129/127	1.209	33	1.173	*	130/127	1.274	33	[1.255]		131/127	1.444	33	1.261	*	129/128	1.226	33	[1.123]		130/128	1.304
737	gi|363740107	PREDICTED: AP-1 complex subunit beta-1 [Gallus gallus]	774	119735	36	28	12	10	16.5	4.93	0.38	Quantitation summary for protein	129/126	1.347	22	1.08	*	130/126	1.244	22	1.096	*	131/126	1.246	21	1.063	*	129/127	0.854	22	1.086	*	130/127	0.771	22	1.099	*	131/127	0.83	22	1.121	*	129/128	1.333	22	1.071	*	130/128	1.214
738	gi|363739973	PREDICTED: 39S ribosomal protein L40, mitochondrial-like [Gallus gallus]	769	27280	27	24	8	7	40.3	9.41	2.55	Quantitation summary for protein	129/126	0.781	25	[1.078]		130/126	0.894	24	1.06	*	131/126	0.998	25	1.052		129/127	1.245	25	1.159	*	130/127	1.399	24	1.172	*	131/127	1.655	25	1.182	*	129/128	1.103	25	1.095	*	130/128	1.248
739	gi|6448447	mitochondrial carrier homolog 2 [Gallus gallus]	768	36828	38	31	10	7	26.8	9.38	1.17	Quantitation summary for protein	129/126	1.586	31	[1.076]		130/126	1.222	31	1.057	*	131/126	1.013	31	1.043		129/127	1.776	31	[1.359]		130/127	1.337	31	[1.328]		131/127	1.18	31	[1.311]		129/128	1.469	31	1.109	*	130/128	1.116
740	gi|2766187	aminopeptidase Ey [Gallus gallus]	767	115132	28	25	11	10	12.9	5.06	0.32	Quantitation summary for protein	129/126	0.777	24	[1.072]		130/126	0.934	24	1.055	*	131/126	0.783	24	[1.042]		129/127	1.051	24	1.121	*	130/127	1.234	24	1.155	*	131/127	1.101	24	1.179	*	129/128	0.77	24	1.097	*	130/128	0.912
741	gi|363743802	PREDICTED: thimet oligopeptidase-like [Gallus gallus]	766	91604	38	31	15	12	20.7	5.78	0.75	Quantitation summary for protein	129/126	1.163	35	[1.045]		130/126	1.144	35	[1.038]		131/126	1.205	35	1.024	*	129/127	1.367	34	1.139	*	130/127	1.31	34	1.147	*	131/127	1.461	34	1.166	*	129/128	1.142	35	[1.079]		130/128	1.108
742	gi|50752997	PREDICTED: sulfide:quinone oxidoreductase, mitochondrial [Gallus gallus]	765	60194	23	20	10	9	24	9.29	0.7	Quantitation summary for protein	129/126	1.485	20	[1.124]		130/126	1.186	20	1.068	*	131/126	0.939	20	[1.084]		129/127	1.199	20	1.264	*	130/127	0.936	20	1.351		131/127	0.789	20	[1.377]		129/128	1.227	20	[1.116]		130/128	0.967
743	gi|53130296	hypothetical protein RCJMB04_6n9 [Gallus gallus]	765	50347	32	24	12	9	34.6	5.28	1.01	Quantitation summary for protein	129/126	0.711	25	1.06	*	130/126	0.887	25	1.052	*	131/126	0.779	25	1.036	*	129/127	1.67	25	[1.207]		130/127	2.037	25	[1.204]		131/127	1.903	25	1.211	*	129/128	0.997	25	[1.120]		130/128	1.227
744	gi|53135495	hypothetical protein RCJMB04_25e17 [Gallus gallus]	764	25743	26	25	6	6	27.5	5.33	1.35	Quantitation summary for protein	129/126	1.036	26	1.143		130/126	0.973	26	1.077		131/126	1.074	26	1.084	*	129/127	2.263	26	[1.217]		130/127	2.079	26	1.219	*	131/127	2.439	26	1.271	*	129/128	1.238	26	1.106	*	130/128	1.147
745	gi|12964600	branched-chain alpha-keto acid dehydrogenase E1-beta subunit [Gallus gallus]	764	47412	29	25	8	7	30.1	8.15	1.24	Quantitation summary for protein	129/126	1.369	29	[1.135]		130/126	1.025	27	1.145		131/126	1.084	29	1.105	*	129/127	1.011	29	1.472		130/127	0.741	27	1.545	*	131/127	0.833	29	1.567	*	129/128	1.41	29	1.209	*	130/128	1.042
746	gi|363732447	PREDICTED: mitochondrial peptide methionine sulfoxide reductase [Gallus gallus]	764	29538	18	18	4	4	24.3	8.88	0.9	Quantitation summary for protein	129/126	0.889	17	1.054	*	130/126	1.002	18	1.082		131/126	0.959	18	[1.061]		129/127	0.836	18	[1.115]		130/127	0.915	18	1.126	*	131/127	0.932	18	1.099	*	129/128	0.819	18	1.057	*	130/128	0.904
747	gi|459683832	AD012Z protein [Gallus gallus]	763	125862	27	27	10	10	12.1	6.28	0.29	Quantitation summary for protein	129/126	1.028	27	[1.045]		130/126	0.961	27	1.05	*	131/126	1.349	27	1.041	*	129/127	0.639	27	[1.109]		130/127	0.584	27	[1.118]		131/127	0.873	27	1.114	*	129/128	1.153	27	[1.071]		130/128	1.063
748	gi|211386	calmodulin [Gallus gallus]	763	18889	58	36	10	9	51.7	4.09	12.86	Quantitation summary for protein	129/126	0.275	36	1.23	*	130/126	0.588	35	1.082	*	131/126	0.871	36	1.099	*	129/127	1.671	34	1.247	*	130/127	3.521	33	1.411	*	131/127	5.449	34	[1.458]		129/128	1.126	33	1.211	*	130/128	2.391
749	gi|33340029	collapsin response mediator protein-4A, partial [Gallus gallus]	762	27308	30	25	8	6	55.1	5.16	1.82	Quantitation summary for protein	129/126	1.092	11	1.08	*	130/126	0.988	10	1.113		131/126	0.999	11	1.093		129/127	0.47	11	1.238	*	130/127	0.382	10	1.219	*	131/127	0.447	11	1.263	*	129/128	0.685	11	1.164	*	130/128	0.605
750	gi|363733066	PREDICTED: uncharacterized protein LOC769205 [Gallus gallus]	762	72672	37	31	14	12	24.3	9.03	0.78	Quantitation summary for protein	129/126	1.12	31	1.038	*	130/126	0.977	28	1.065		131/126	0.919	31	1.051	*	129/127	1.347	31	1.155	*	130/127	1.154	29	[1.136]		131/127	1.15	31	1.142	*	129/128	1.069	31	1.079	*	130/128	0.922
751	gi|88908538	RecName: Full=26S proteasome non-ATPase regulatory subunit 13; AltName: Full=26S proteasome regulatory subunit RPN9; AltName: Full=26S proteasome regulatory subunit S11; AltName: Full=26S proteasome regulatory subunit p40.5	761	48280	34	29	13	11	36.7	5.37	1.52	Quantitation summary for protein	129/126	1.307	32	[1.036]		130/126	1.116	31	[1.055]		131/126	1.253	32	1.049	*	129/127	1.656	32	1.137	*	130/127	1.391	31	1.147	*	131/127	1.652	32	1.168	*	129/128	1.373	32	1.097	*	130/128	1.162
752	gi|53130302	hypothetical protein RCJMB04_6o1 [Gallus gallus]	760	42382	26	22	10	9	35.6	9.39	1.12	Quantitation summary for protein	129/126	0.842	18	1.134	*	130/126	0.901	16	[1.140]		131/126	1.093	18	1.095	*	129/127	1.243	18	1.239	*	130/127	1.304	16	1.368	*	131/127	1.678	18	1.334	*	129/128	1.337	18	1.122	*	130/128	1.412
753	gi|313760705	monocarboxylate transporter 2 [Gallus gallus]	759	59710	20	18	5	3	7.5	8.64	0.54	Quantitation summary for protein	129/126	1.797	18	1.223	*	130/126	1.193	18	1.103	*	131/126	1.095	18	[1.108]		129/127	1.096	18	1.49		130/127	0.712	18	1.52	*	131/127	0.695	18	[1.483]		129/128	1.416	18	1.298	*	130/128	0.928
754	gi|363741398	PREDICTED: erythrocyte membrane protein band 4.1-like 1 [Gallus gallus]	758	113775	40	31	11	9	16.7	5.42	0.41	Quantitation summary for protein	129/126	0.79	35	1.059	*	130/126	0.798	35	1.039	*	131/126	0.897	35	[1.053]		129/127	0.993	35	[1.129]		130/127	0.98	35	1.147		131/127	1.172	35	1.164	*	129/128	1.079	35	[1.117]		130/128	1.074
755	gi|2827444	nucleoside diphosphate kinase [Gallus gallus]	757	20198	53	45	10	9	69.3	7.72	20.74	Quantitation summary for protein	129/126	0.833	40	1.053	*	130/126	0.788	38	1.065	*	131/126	1.038	40	1.036	*	129/127	1.19	40	[1.131]		130/127	1.106	39	[1.172]		131/127	1.543	40	[1.178]		129/128	0.932	40	[1.095]		130/128	0.875
756	gi|53133158	hypothetical protein RCJMB04_14j19 [Gallus gallus]	756	80427	41	34	14	12	27.7	8.56	0.82	Quantitation summary for protein	129/126	1.133	34	1.058	*	130/126	1.045	33	[1.048]		131/126	1.262	34	1.043	*	129/127	1.465	34	1.128	*	130/127	1.34	33	1.151	*	131/127	1.698	34	1.167	*	129/128	1.418	33	1.051	*	130/128	1.294
757	gi|363741518	PREDICTED: GTP-binding protein REM 1 [Gallus gallus]	755	41048	24	23	6	6	20.4	9.43	0.72	Quantitation summary for protein	129/126	0.859	22	1.035	*	130/126	0.84	22	[1.084]		131/126	0.801	22	[1.047]		129/127	1.072	22	[1.207]		130/127	1.025	22	[1.203]		131/127	1.04	22	[1.199]		129/128	0.803	22	[1.072]		130/128	0.774
758	gi|118092776	PREDICTED: WASH complex subunit FAM21A [Gallus gallus]	754	177819	23	19	7	5	7.7	4.59	0.12	Quantitation summary for protein	129/126	0.744	20	1.045	*	130/126	0.794	19	1.085	*	131/126	0.933	20	1.047	*	129/127	0.577	20	[1.162]		130/127	0.603	19	[1.242]		131/127	0.754	20	[1.182]		129/128	0.86	19	1.039	*	130/128	0.92
759	gi|53127656	hypothetical protein RCJMB04_2n23 [Gallus gallus]	753	43327	24	18	10	6	36.5	6.46	0.8	Quantitation summary for protein	129/126	0.84	17	1.069	*	130/126	0.85	13	1.116	*	131/126	0.834	19	1.107	*	129/127	0.572	18	[1.128]		130/127	0.566	13	1.172	*	131/127	0.648	17	1.108	*	129/128	0.865	18	1.11	*	130/128	0.866
760	gi|118101792	PREDICTED: cytosolic 5~-nucleotidase 1A [Gallus gallus]	752	46730	34	28	13	11	42.5	6.29	1.6	Quantitation summary for protein	129/126	0.935	32	[1.101]		130/126	0.998	32	[1.041]		131/126	1.061	32	1.036	*	129/127	0.837	32	[1.132]		130/127	0.873	32	1.19	*	131/127	0.988	32	1.193		129/128	0.984	32	1.064		130/128	1.036
761	gi|363727569	PREDICTED: cullin-associated NEDD8-dissociated protein 1 isoform 2 [Gallus gallus]	752	152872	45	36	17	14	13.3	5.49	0.43	Quantitation summary for protein	129/126	1.491	25	[1.049]		130/126	1.411	25	[1.063]		131/126	1.305	25	1.043	*	129/127	1.445	25	1.097	*	130/127	1.337	25	1.104	*	131/127	1.316	25	[1.105]		129/128	1.768	25	1.084	*	130/128	1.65
762	gi|53130428	hypothetical protein RCJMB04_7m18 [Gallus gallus]	751	17670	32	25	8	7	50	6.55	3.84	Quantitation summary for protein	129/126	1.123	24	1.078	*	130/126	0.954	24	1.065	*	131/126	1.097	25	1.056	*	129/127	1.084	25	[1.284]		130/127	0.901	25	[1.276]		131/127	1.097	25	[1.363]		129/128	1.296	25	[1.154]		130/128	1.087
763	gi|363728992	PREDICTED: carbohydrate kinase domain-containing protein [Gallus gallus]	749	64479	34	29	10	8	21.6	6.23	0.64	Quantitation summary for protein	129/126	1.005	29	1.047		130/126	1.052	28	1.044	*	131/126	0.973	29	1.03	*	129/127	1.025	29	1.126		130/127	1.045	29	1.167		131/127	1.032	29	1.162		129/128	1.038	29	[1.068]		130/128	1.068
764	gi|381342463	pigment epithelium-derived factor precursor [Gallus gallus]	749	53408	26	20	6	4	19.5	8.85	0.52	Quantitation summary for protein	129/126	0.965	24	1.039	*	130/126	0.937	23	1.049	*	131/126	0.891	23	1.021	*	129/127	0.764	24	[1.172]		130/127	0.723	23	[1.173]		131/127	0.732	24	[1.192]		129/128	1.074	24	1.087	*	130/128	1.028
765	gi|50754987	PREDICTED: delta-sarcoglycan [Gallus gallus]	746	37692	27	22	10	9	44.5	9.33	1.52	Quantitation summary for protein	129/126	1.073	23	[1.089]		130/126	0.823	23	1.131	*	131/126	0.95	23	1.051	*	129/127	0.735	23	1.15	*	130/127	0.55	23	1.203	*	131/127	0.676	23	1.239	*	129/128	0.819	23	1.096	*	130/128	0.619
766	gi|363736344	PREDICTED: LOW QUALITY PROTEIN: protein PRRC2C-like [Gallus gallus]	746	333840	29	26	12	10	6	9.07	0.11	Quantitation summary for protein	129/126	0.875	27	1.033	*	130/126	0.903	25	1.047	*	131/126	1.018	27	[1.025]		129/127	0.689	27	[1.151]		130/127	0.697	25	[1.157]		131/127	0.834	27	[1.152]		129/128	1.115	27	[1.066]		130/128	1.139
767	gi|363729502	PREDICTED: S-formylglutathione hydrolase isoform 1 [Gallus gallus]	746	37037	25	23	7	7	27	6.3	1.56	Quantitation summary for protein	129/126	0.991	25	1.07		130/126	1.095	25	1.038	*	131/126	1.135	25	[1.055]		129/127	1.052	25	1.168		130/127	1.136	25	1.238	*	131/127	1.254	25	1.256	*	129/128	0.941	25	[1.091]		130/128	1.026
768	gi|118084007	PREDICTED: uncharacterized protein LOC771780 [Gallus gallus]	745	12397	26	22	6	6	47.7	9.01	6.02	Quantitation summary for protein	129/126	0.514	23	1.155	*	130/126	0.511	23	1.106	*	131/126	0.696	23	1.104	*	129/127	0.741	23	[1.525]		130/127	0.72	23	[1.685]		131/127	1.044	23	[1.703]		129/128	0.742	23	[1.342]		130/128	0.727
769	gi|6855513	syndesmos [Gallus gallus]	744	36270	39	35	10	10	30.3	5.74	1.61	Quantitation summary for protein	129/126	0.933	35	[1.043]		130/126	1.026	34	1.049	*	131/126	1.112	35	1.036	*	129/127	1.469	35	1.103	*	130/127	1.588	34	1.122	*	131/127	1.821	35	1.132	*	129/128	1.141	35	1.043	*	130/128	1.243
770	gi|60098771	hypothetical protein RCJMB04_8i9 [Gallus gallus]	744	27829	32	29	11	10	55	5.64	3.34	Quantitation summary for protein	129/126	0.871	30	1.051	*	130/126	0.925	30	1.117	*	131/126	0.95	30	[1.079]		129/127	1.139	30	1.136	*	130/127	1.182	30	1.239	*	131/127	1.292	30	1.206	*	129/128	0.68	30	1.099	*	130/128	0.712
771	gi|118084001	PREDICTED: peroxiredoxin-4 isoform 2 [Gallus gallus]	744	33510	43	33	11	9	39.2	6.25	2.1	Quantitation summary for protein	129/126	1.02	39	1.062	*	130/126	1.019	39	[1.075]		131/126	1.119	39	1.044	*	129/127	1.099	39	1.125	*	130/127	1.072	39	1.16	*	131/127	1.253	39	[1.181]		129/128	1.152	39	1.056	*	130/128	1.134
772	gi|363741381	PREDICTED: protein KIAA0664 [Gallus gallus]	744	170973	41	35	15	13	12.1	5.73	0.33	Quantitation summary for protein	129/126	1.312	36	[1.046]		130/126	1.209	35	1.055	*	131/126	1.298	36	1.049	*	129/127	1.224	36	[1.111]		130/127	1.102	35	[1.112]		131/127	1.259	36	[1.124]		129/128	1.335	36	[1.094]		130/128	1.214
773	gi|50806228	PREDICTED: erlin-2 [Gallus gallus]	744	45239	16	16	4	4	14.9	5.52	0.42	Quantitation summary for protein	129/126	1.261	6	[1.068]		130/126	1.239	6	1.098	*	131/126	1.182	6	1.05	*	129/127	2.107	6	[1.181]		130/127	2.024	6	1.191	*	131/127	2.055	6	[1.184]		129/128	1.109	6	1.061	*	130/128	1.075
774	gi|60098399	hypothetical protein RCJMB04_1j11 [Gallus gallus]	743	64631	32	24	12	10	26.3	6.57	0.91	Quantitation summary for protein	129/126	1.055	28	[1.087]		130/126	0.946	28	1.032	*	131/126	1.161	28	1.038	*	129/127	0.952	28	1.157		130/127	0.835	28	1.221	*	131/127	1.09	28	1.245	*	129/128	1.146	28	1.093	*	130/128	1.014
775	gi|363741113	PREDICTED: eukaryotic translation initiation factor 4H-like isoform 1 [Gallus gallus]	743	31113	30	27	9	8	37.8	7.77	2.06	Quantitation summary for protein	129/126	0.698	28	1.071	*	130/126	0.903	28	[1.070]		131/126	0.968	28	[1.053]		129/127	0.77	29	[1.202]		130/127	1.031	28	[1.200]		131/127	1.105	29	[1.283]		129/128	0.733	29	[1.133]		130/128	0.944
776	gi|54111231	immunoglobulin light chain [Gallus gallus]	743	13560	17	15	3	1	33.3	6.34	0.96	Quantitation summary for protein	129/126	---	0	---		130/126	---	0	---		131/126	---	0	---		129/127	---	0	---		130/127	---	0	---		131/127	---	0	---		129/128	---	0	---		130/128	---
777	gi|1536812	immunoglobulin heavy chain variable region [Gallus gallus]	743	12292	17	15	3	1	38.5	5.13	1.09	Quantitation summary for protein	129/126	---	0	---		130/126	---	0	---		131/126	---	0	---		129/127	---	0	---		130/127	---	0	---		131/127	---	0	---		129/128	---	0	---		130/128	---
778	gi|86319	Ig gamma chain (clone 86) - chicken (fragments)	741	26548	35	27	7	5	35.1	6.22	1.9	Quantitation summary for protein	129/126	---	1	---		130/126	---	1	---		131/126	---	1	---		129/127	---	1	---		130/127	---	1	---		131/127	---	1	---		129/128	---	1	---		130/128	---
779	gi|363745185	PREDICTED: serine protease HTRA2, mitochondrial, partial [Gallus gallus]	740	39522	22	21	8	8	24.2	9.07	1.23	Quantitation summary for protein	129/126	0.809	22	1.079	*	130/126	0.939	22	1.104	*	131/126	0.829	22	1.042	*	129/127	0.749	22	1.134	*	130/127	0.85	22	1.159	*	131/127	0.817	21	1.131	*	129/128	0.788	22	1.068	*	130/128	0.902
780	gi|118099484	PREDICTED: NADH dehydrogenase [ubiquinone] 1 alpha subcomplex subunit 8 [Gallus gallus]	740	23547	26	23	5	3	29.1	8.42	1.9	Quantitation summary for protein	129/126	0.845	24	[1.164]		130/126	0.943	24	[1.134]		131/126	0.712	24	[1.131]		129/127	0.482	24	[1.179]		130/127	0.526	24	1.195	*	131/127	0.423	24	[1.191]		129/128	0.55	24	1.131	*	130/128	0.605
781	gi|211987	immunoglobulin heavy chain V-region, partial [Gallus gallus]	739	12794	29	26	5	5	47.4	7.86	5.69	Quantitation summary for protein	129/126	---	0	---		130/126	---	0	---		131/126	---	0	---		129/127	---	0	---		130/127	---	0	---		131/127	---	0	---		129/128	---	0	---		130/128	---
782	gi|129270064	ribosomal protein S3A [Gallus gallus]	735	39013	54	39	17	13	56.1	9.74	3.34	Quantitation summary for protein	129/126	1.205	46	[1.064]		130/126	1.172	44	1.039	*	131/126	1.367	46	[1.045]		129/127	1.42	46	[1.231]		130/127	1.385	44	[1.249]		131/127	1.674	46	[1.277]		129/128	1.454	46	[1.169]		130/128	1.404
783	gi|118099442	PREDICTED: erythrocyte band 7 integral membrane protein [Gallus gallus]	735	34689	23	21	9	8	35.9	6.75	1.99	Quantitation summary for protein	129/126	0.88	21	1.118	*	130/126	1.01	22	[1.102]		131/126	0.883	22	1.075	*	129/127	0.866	22	1.3	*	130/127	0.963	22	1.3		131/127	0.896	22	1.302		129/128	0.696	22	[1.250]		130/128	0.781
784	gi|50730176	PREDICTED: apolipoprotein O [Gallus gallus]	734	29984	26	22	6	6	32.4	8.98	1.32	Quantitation summary for protein	129/126	1.272	23	1.144	*	130/126	1.05	17	[1.126]		131/126	0.963	23	1.06	*	129/127	0.324	23	[1.422]		130/127	0.507	17	1.466	*	131/127	0.255	23	[1.494]		129/128	0.44	23	[1.254]		130/128	0.443
785	gi|60098711	hypothetical protein RCJMB04_6m11 [Gallus gallus]	734	87231	29	25	9	7	17.3	6.15	0.45	Quantitation summary for protein	129/126	0.782	27	1.05	*	130/126	0.889	28	1.081	*	131/126	0.968	28	1.034	*	129/127	0.812	28	1.153	*	130/127	0.888	28	1.221	*	131/127	1.03	28	[1.199]		129/128	0.99	28	1.101		130/128	1.092
786	gi|12249117	proliferating cell nuclear antigen [Gallus gallus]	731	32878	28	21	8	6	37.4	4.6	1.88	Quantitation summary for protein	129/126	1.068	26	1.042	*	130/126	0.997	25	1.045		131/126	1.316	26	1.045	*	129/127	0.651	26	1.135	*	130/127	0.595	25	1.163	*	131/127	0.834	26	1.147	*	129/128	1.063	26	1.072	*	130/128	0.98
787	gi|3212610	Chain A, Sulfite Oxidase From Chicken Liver	730	53889	37	33	9	9	30	5.53	1.04	Quantitation summary for protein	129/126	0.98	33	[1.046]		130/126	1.1	33	[1.150]		131/126	0.901	33	1.043	*	129/127	0.619	33	1.079	*	130/127	0.679	33	[1.210]		131/127	0.592	33	[1.086]		129/128	0.809	33	1.058	*	130/128	0.896
788	gi|50757492	PREDICTED: 39S ribosomal protein L41-A, mitochondrial [Gallus gallus]	730	18845	27	23	6	4	44.4	9.91	2.16	Quantitation summary for protein	129/126	0.863	22	[1.034]		130/126	0.938	20	1.044	*	131/126	1.028	23	1.026	*	129/127	0.707	22	[1.051]		130/127	0.739	21	1.069	*	131/127	0.874	24	[1.070]		129/128	0.834	21	1.03	*	130/128	0.898
789	gi|53129987	hypothetical protein RCJMB04_6g4 [Gallus gallus]	729	27350	30	28	9	8	49	5.24	2.98	Quantitation summary for protein	129/126	1.059	29	1.045	*	130/126	1.242	27	1.071	*	131/126	1.062	29	1.035	*	129/127	1.043	28	1.115		130/127	1.172	28	1.137	*	131/127	1.087	28	1.1	*	129/128	0.765	29	[1.052]		130/128	0.882
790	gi|444741647	endoplasmic reticulum resident protein 29 precursor [Gallus gallus]	725	36538	31	27	13	13	40.1	7.63	3.01	Quantitation summary for protein	129/126	0.724	30	1.154	*	130/126	0.821	28	1.087	*	131/126	0.976	30	1.062	*	129/127	0.584	30	1.248	*	130/127	0.686	29	1.405	*	131/127	0.819	30	1.442	*	129/128	0.827	30	1.127	*	130/128	0.964
791	gi|50728788	PREDICTED: 3-mercaptopyruvate sulfurtransferase isoform 2 [Gallus gallus]	724	38298	40	32	11	11	36.7	5.8	2.47	Quantitation summary for protein	129/126	0.999	35	1.019		130/126	1.047	35	1.055	*	131/126	0.88	35	1.039	*	129/127	0.75	35	[1.095]		130/127	0.768	35	[1.098]		131/127	0.66	34	1.095	*	129/128	0.854	34	1.044	*	130/128	0.88
792	gi|308818184	acetyl-Coenzyme A acyltransferase 1 (peroxisomal 3-oxoacyl-Coenzyme A thiolase) [Gallus gallus]	724	50134	37	31	13	13	46.1	9.26	2.14	Quantitation summary for protein	129/126	1.152	34	1.055	*	130/126	1.032	32	[1.067]		131/126	0.997	34	1.043		129/127	0.889	34	[1.150]		130/127	0.795	32	[1.125]		131/127	0.8	34	[1.180]		129/128	1.094	34	[1.103]		130/128	0.975
793	gi|50728568	PREDICTED: uncharacterized protein LOC417941 [Gallus gallus]	723	27970	24	21	7	7	48	5.08	1.46	Quantitation summary for protein	129/126	0.741	22	1.069	*	130/126	0.971	22	1.058	*	131/126	1.114	22	[1.053]		129/127	0.902	22	[1.233]		130/127	1.156	22	[1.300]		131/127	1.41	22	[1.328]		129/128	0.849	22	1.068	*	130/128	1.097
794	gi|118097166	PREDICTED: NADH dehydrogenase [ubiquinone] 1 alpha subcomplex subunit 2 [Gallus gallus]	723	12782	33	26	6	4	54	9.82	5.69	Quantitation summary for protein	129/126	0.796	28	1.103	*	130/126	0.844	27	1.13	*	131/126	0.701	28	1.095	*	129/127	0.741	28	[1.438]		130/127	0.768	27	[1.447]		131/127	0.679	28	[1.404]		129/128	0.64	28	[1.127]		130/128	0.67
795	gi|307775405	NADPH--cytochrome P450 reductase [Gallus gallus]	723	86715	33	27	16	11	23.7	5.42	0.74	Quantitation summary for protein	129/126	1.252	29	[1.072]		130/126	1.191	29	[1.071]		131/126	1.133	29	[1.058]		129/127	1.246	29	1.12	*	130/127	1.158	29	1.141	*	131/127	1.173	29	1.135	*	129/128	1.244	29	1.066	*	130/128	1.167
796	gi|363731201	PREDICTED: polyribonucleotide nucleotidyltransferase 1, mitochondrial [Gallus gallus]	723	96335	26	23	11	9	19.1	7.53	0.44	Quantitation summary for protein	129/126	1.262	25	1.042	*	130/126	1.133	25	[1.079]		131/126	1.085	25	1.043	*	129/127	0.766	25	1.15	*	130/127	0.673	25	1.182	*	131/127	0.685	25	[1.154]		129/128	1.036	24	1.073	*	130/128	0.916
797	gi|790617	A1 isoform of vacuolar H+-ATPase subunit A [Gallus gallus]	722	76796	35	26	17	13	28.5	5.51	1.12	Quantitation summary for protein	129/126	1.087	31	[1.114]		130/126	1.178	29	1.034	*	131/126	1.251	31	1.078	*	129/127	0.936	30	1.128	*	130/127	0.919	31	[1.242]		131/127	1.044	31	[1.297]		129/128	1.028	31	1.101		130/128	1.093
798	gi|53129708	hypothetical protein RCJMB04_6a12 [Gallus gallus]	722	18685	33	28	6	6	27.8	5.32	4.27	Quantitation summary for protein	129/126	---	0	---		130/126	---	0	---		131/126	---	0	---		129/127	---	0	---		130/127	---	0	---		131/127	---	0	---		129/128	---	0	---		130/128	---
799	gi|363737670	PREDICTED: tight junction protein ZO-1 [Gallus gallus]	721	210812	41	33	16	13	12.4	6.3	0.24	Quantitation summary for protein	129/126	0.67	35	[1.036]		130/126	0.757	35	1.047	*	131/126	0.744	35	1.035	*	129/127	0.856	35	[1.101]		130/127	0.945	35	[1.108]		131/127	0.989	35	1.107		129/128	0.834	35	1.042	*	130/128	0.929
800	gi|363728810	PREDICTED: glycerol kinase isoform 1 [Gallus gallus]	720	68193	20	20	5	5	10.9	5.68	0.39	Quantitation summary for protein	129/126	1.482	20	[1.062]		130/126	1.4	20	1.072	*	131/126	1.284	20	[1.046]		129/127	1.507	20	1.245	*	130/127	1.391	20	[1.265]		131/127	1.358	20	1.241	*	129/128	1.394	20	1.117	*	130/128	1.299
801	gi|135767	RecName: Full=Thioredoxin; Short=Trx	720	15186	49	34	10	7	56.2	5.1	12.76	Quantitation summary for protein	129/126	1.11	36	1.058	*	130/126	0.961	36	[1.065]		131/126	1.086	36	1.049	*	129/127	1.32	36	[1.504]		130/127	1.118	36	[1.485]		131/127	1.344	36	[1.561]		129/128	1.209	36	[1.320]		130/128	1.033
802	gi|363742805	PREDICTED: uncharacterized protein LOC100857958 [Gallus gallus]	720	79826	22	20	11	9	20	5.32	0.56	Quantitation summary for protein	129/126	0.889	20	1.078	*	130/126	0.767	19	1.152	*	131/126	1.007	20	1.066		129/127	0.921	20	[1.272]		130/127	0.777	19	1.267	*	131/127	1.086	20	[1.319]		129/128	0.981	20	1.119		130/128	0.834
803	gi|363729746	PREDICTED: protein TBRG4 [Gallus gallus]	720	78798	35	32	12	10	22.7	8.11	0.57	Quantitation summary for protein	129/126	1.101	33	[1.047]		130/126	1.082	33	1.062	*	131/126	1.068	33	1.023	*	129/127	1.39	33	1.184	*	130/127	1.335	33	1.181	*	131/127	1.402	33	[1.212]		129/128	1.25	33	1.066	*	130/128	1.095
804	gi|363744423	PREDICTED: GTP:AMP phosphotransferase, mitochondrial-like [Gallus gallus]	717	30253	30	27	12	11	54.6	8.94	3.77	Quantitation summary for protein	129/126	0.713	29	[1.092]		130/126	0.831	29	[1.098]		131/126	0.744	29	[1.069]		129/127	1.092	29	1.176	*	130/127	1.244	29	1.222	*	131/127	1.185	29	[1.216]		129/128	0.815	29	1.098	*	130/128	0.937
805	gi|50744634	PREDICTED: reticulon-4-interacting protein 1, mitochondrial [Gallus gallus]	717	45249	31	27	10	8	31.7	8.71	1.68	Quantitation summary for protein	129/126	1.138	31	1.068	*	130/126	1.095	30	1.076	*	131/126	1.029	31	1.075	*	129/127	1.259	31	1.194	*	130/127	1.185	30	1.225	*	131/127	1.185	31	1.248	*	129/128	0.992	31	1.121		130/128	0.95
806	gi|363742021	PREDICTED: cytosolic acyl coenzyme A thioester hydrolase isoform 1 [Gallus gallus]	716	43399	30	28	6	6	22.4	7.14	0.8	Quantitation summary for protein	129/126	1.182	29	1.038	*	130/126	1.009	27	[1.049]		131/126	1.182	28	1.031	*	129/127	1.204	29	1.059	*	130/127	1.009	27	1.08		131/127	1.252	29	1.068	*	129/128	1.087	29	[1.050]		130/128	0.911
807	gi|212091	immunoglobulin light-chain VJ region, partial [Gallus gallus]	716	11379	17	15	2	2	39.6	6.29	1.87	Quantitation summary for protein	129/126	---	0	---		130/126	---	0	---		131/126	---	0	---		129/127	---	0	---		130/127	---	0	---		131/127	---	0	---		129/128	---	0	---		130/128	---
808	gi|211985	immunoglobulin heavy chain V-region, partial [Gallus gallus]	714	12622	30	26	5	5	48.2	8.67	7.64	Quantitation summary for protein	129/126	---	0	---		130/126	---	0	---		131/126	---	0	---		129/127	---	0	---		130/127	---	0	---		131/127	---	0	---		129/128	---	0	---		130/128	---
809	gi|2281033	vigilin [Gallus gallus]	714	169170	38	25	19	14	18.1	6.74	0.38	Quantitation summary for protein	129/126	1.183	32	[1.050]		130/126	1.06	31	1.034	*	131/126	1.14	32	[1.035]		129/127	1.466	32	1.097	*	130/127	1.283	32	[1.143]		131/127	1.469	32	[1.142]		129/128	1.503	32	1.053	*	130/128	1.328
810	gi|50760435	PREDICTED: 60S ribosomal protein L10a [Gallus gallus]	713	32884	34	28	9	8	33.2	9.88	2.5	Quantitation summary for protein	129/126	1.315	30	[1.083]		130/126	1.168	29	[1.061]		131/126	1.263	30	1.032	*	129/127	1.055	30	1.132	*	130/127	0.915	29	[1.164]		131/127	1.054	30	[1.178]		129/128	1.139	30	[1.105]		130/128	0.997
811	gi|53134733	hypothetical protein RCJMB04_23k10 [Gallus gallus]	713	27804	38	31	9	7	45.5	8.59	2.9	Quantitation summary for protein	129/126	1.126	18	[1.118]		130/126	1.131	17	1.133	*	131/126	1.159	18	1.044	*	129/127	1.134	18	1.212	*	130/127	1.115	17	1.353		131/127	1.214	18	1.258	*	129/128	0.885	18	1.109	*	130/128	0.877
812	gi|304423	sterol carrier protein-2, partial [Gallus gallus]	713	69993	39	31	13	12	20.5	8.49	0.99	Quantitation summary for protein	129/126	0.881	36	1.043	*	130/126	0.961	36	1.036	*	131/126	1.034	36	1.036	*	129/127	0.938	36	1.171	*	130/127	1.001	36	1.182		131/127	1.146	36	[1.186]		129/128	1.014	36	[1.065]		130/128	1.092
813	gi|118083604	PREDICTED: 60S ribosomal protein L24 [Gallus gallus]	712	24311	28	23	8	7	36.3	11.26	2.63	Quantitation summary for protein	129/126	1.377	26	1.062	*	130/126	1.241	26	1.044	*	131/126	1.226	26	1.036	*	129/127	0.792	26	[1.264]		130/127	0.839	25	1.218	*	131/127	0.734	26	1.241	*	129/128	1.244	26	[1.129]		130/128	1.106
814	gi|53130772	hypothetical protein RCJMB04_10a7 [Gallus gallus]	712	63849	21	19	7	5	19.3	5.07	0.35	Quantitation summary for protein	129/126	1.078	20	[1.049]		130/126	0.899	20	1.057	*	131/126	1.115	20	[1.031]		129/127	0.718	20	[1.073]		130/127	0.585	20	[1.138]		131/127	0.773	20	[1.119]		129/128	1.167	20	1.04	*	130/128	0.96
815	gi|50729668	PREDICTED: protein TFG [Gallus gallus]	710	45654	40	35	11	10	31.6	4.96	1.48	Quantitation summary for protein	129/126	0.759	39	1.04	*	130/126	0.891	39	1.055	*	131/126	0.888	39	[1.055]		129/127	0.706	39	1.13	*	130/127	0.811	39	1.17	*	131/127	0.859	39	[1.189]		129/128	0.815	39	[1.087]		130/128	0.944
816	gi|53133117	hypothetical protein RCJMB04_14i9 [Gallus gallus]	709	30039	23	21	11	10	47.3	4.76	3.34	Quantitation summary for protein	129/126	0.895	21	1.084	*	130/126	0.966	20	1.065	*	131/126	1.084	21	1.063	*	129/127	1.097	20	1.236		130/127	1.121	20	1.353		131/127	1.336	21	1.366	*	129/128	0.862	21	[1.174]		130/128	0.92
817	gi|53130830	hypothetical protein RCJMB04_10e23 [Gallus gallus]	709	31659	36	33	13	12	47.3	7.74	2.66	Quantitation summary for protein	129/126	0.945	34	[1.056]		130/126	1.04	33	1.031	*	131/126	1.14	34	1.032	*	129/127	0.906	34	[1.187]		130/127	0.977	34	1.181		131/127	1.137	34	[1.223]		129/128	0.992	34	[1.089]		130/128	1.08
818	gi|53133850	hypothetical protein RCJMB04_20p1 [Gallus gallus]	708	27814	20	19	6	5	26.8	5.11	1.21	Quantitation summary for protein	129/126	0.924	20	1.113	*	130/126	0.866	20	1.039	*	131/126	1.063	20	[1.067]		129/127	1.461	20	1.196	*	130/127	1.338	20	1.28	*	131/127	1.749	20	1.336	*	129/128	1.058	20	[1.136]		130/128	0.978
819	gi|60099067	hypothetical protein RCJMB04_22h1 [Gallus gallus]	707	98844	31	26	15	13	23.8	6.36	0.63	Quantitation summary for protein	129/126	1.441	27	[1.123]		130/126	1.128	27	[1.058]		131/126	1.217	27	1.06	*	129/127	1.442	28	1.187	*	130/127	1.114	27	1.223	*	131/127	1.269	28	[1.245]		129/128	1.503	28	1.109	*	130/128	1.164
820	gi|53136840	hypothetical protein RCJMB04_34n23 [Gallus gallus]	706	24431	24	22	7	7	51.1	4.94	2.61	Quantitation summary for protein	129/126	0.732	21	1.078	*	130/126	0.775	20	1.075	*	131/126	0.85	22	1.024	*	129/127	0.892	20	1.236	*	130/127	0.891	19	1.296		131/127	1.043	20	[1.277]		129/128	0.916	22	[1.123]		130/128	0.95
821	gi|310772245	enoyl-CoA hydratase domain-containing protein 3, mitochondrial [Gallus gallus]	706	35947	29	26	12	11	47.6	8.65	2.15	Quantitation summary for protein	129/126	0.851	28	[1.153]		130/126	1.066	28	[1.105]		131/126	0.909	28	[1.052]		129/127	1.266	28	1.263	*	130/127	1.549	28	1.362	*	131/127	1.407	28	1.413	*	129/128	1.008	28	[1.190]		130/128	1.245
822	gi|118101426	PREDICTED: prenylcysteine oxidase [Gallus gallus]	705	62389	35	27	8	8	23.7	7.21	0.85	Quantitation summary for protein	129/126	0.853	28	1.061	*	130/126	0.837	29	1.082	*	131/126	0.969	29	[1.064]		129/127	1.412	29	1.226	*	130/127	1.349	29	1.244	*	131/127	1.661	29	1.279	*	129/128	0.793	27	1.045	*	130/128	0.76
823	gi|118097222	PREDICTED: eukaryotic peptide chain release factor subunit 1 [Gallus gallus]	705	57936	27	19	6	4	14.4	5.51	0.39	Quantitation summary for protein	129/126	0.982	25	1.047		130/126	1.041	25	[1.055]		131/126	1.232	25	1.048	*	129/127	1.177	25	[1.163]		130/127	1.219	25	[1.226]		131/127	1.536	25	[1.242]		129/128	1.328	25	[1.083]		130/128	1.388
824	gi|53134000	hypothetical protein RCJMB04_22d9 [Gallus gallus]	704	60965	34	26	14	11	31.8	6.62	0.98	Quantitation summary for protein	129/126	1.1	27	[1.045]		130/126	1.017	27	1.027	*	131/126	1.074	27	[1.028]		129/127	1.922	27	1.143	*	130/127	1.736	27	[1.145]		131/127	1.95	27	[1.152]		129/128	1.398	27	1.057	*	130/128	1.274
825	gi|53128375	hypothetical protein RCJMB04_4m4 [Gallus gallus]	702	62708	30	25	10	7	16.2	6.3	0.67	Quantitation summary for protein	129/126	1.354	26	[1.104]		130/126	1.177	22	1.034	*	131/126	1.393	26	1.039	*	129/127	2.581	24	[1.434]		130/127	2.359	21	[1.361]		131/127	2.754	24	[1.549]		129/128	2.015	26	[1.227]		130/128	1.745
826	gi|190576833	inter-alpha inhibitor heavy chain 2 precursor [Gallus gallus]	702	122338	40	33	14	11	15.4	6.92	0.45	Quantitation summary for protein	129/126	0.875	35	1.032	*	130/126	1.054	35	1.039	*	131/126	0.635	35	[1.037]		129/127	0.736	35	[1.069]		130/127	0.867	35	1.095	*	131/127	0.556	35	[1.086]		129/128	0.641	35	1.044	*	130/128	0.762
827	gi|363728462	PREDICTED: omega-amidase NIT2 isoform 2 [Gallus gallus]	702	36476	27	25	9	8	32.3	8.07	1.6	Quantitation summary for protein	129/126	1.194	26	1.061	*	130/126	0.975	26	1.048	*	131/126	0.925	26	1.05	*	129/127	1.614	26	1.128	*	130/127	1.288	26	1.161	*	131/127	1.301	26	1.189	*	129/128	1.274	26	1.102	*	130/128	1.026
828	gi|363727431	PREDICTED: probable 2-oxoglutarate dehydrogenase E1 component DHKTD1, mitochondrial [Gallus gallus]	702	113995	28	25	9	7	12.7	6.31	0.25	Quantitation summary for protein	129/126	1.462	26	[1.080]		130/126	1.075	26	1.07	*	131/126	1.17	26	1.049	*	129/127	1.016	26	[1.181]		130/127	0.73	26	1.164	*	131/127	0.845	26	[1.147]		129/128	1.255	26	[1.120]		130/128	0.91
829	gi|793834	ribosomal protein S6 [Gallus gallus]	700	36829	29	25	9	9	31.3	10.83	1.36	Quantitation summary for protein	129/126	1.416	26	[1.088]		130/126	1.139	26	1.043	*	131/126	1.319	26	1.039	*	129/127	0.963	26	1.236		130/127	0.757	26	1.329	*	131/127	0.933	26	1.361		129/128	1.462	26	1.148	*	130/128	1.16
830	gi|53136708	hypothetical protein RCJMB04_32l4 [Gallus gallus]	700	72712	40	31	17	14	25.4	8.41	1.64	Quantitation summary for protein	129/126	0.96	34	1.052	*	130/126	0.9	33	1.051	*	131/126	1.112	35	1.045	*	129/127	0.647	36	[1.174]		130/127	0.597	34	1.165	*	131/127	0.808	36	[1.237]		129/128	0.96	36	[1.139]		130/128	0.914
831	gi|53136458	hypothetical protein RCJMB04_29f20 [Gallus gallus]	700	17579	22	21	6	5	47.2	5	1.88	Quantitation summary for protein	129/126	0.956	19	1.056	*	130/126	1.864	19	[1.483]		131/126	0.89	19	1.079	*	129/127	1.314	19	[1.204]		130/127	2.503	19	[1.537]		131/127	1.272	19	1.206	*	129/128	1.052	19	[1.099]		130/128	2.023
832	gi|5805326	ubiquitin carboxyl-terminal hydrolase-6 [Gallus gallus]	699	29907	29	22	9	8	39.1	4.91	1.88	Quantitation summary for protein	129/126	1.071	23	1.047	*	130/126	1.068	23	1.076	*	131/126	1.09	23	[1.056]		129/127	1.087	23	1.108	*	130/127	1.059	23	1.161		131/127	1.15	23	[1.166]		129/128	1.136	23	1.132	*	130/128	1.116
833	gi|118094283	PREDICTED: glycogen debranching enzyme [Gallus gallus]	699	194950	34	28	15	14	10.1	6.59	0.28	Quantitation summary for protein	129/126	1.656	31	1.05	*	130/126	1.365	28	1.034	*	131/126	1.541	31	1.048	*	129/127	1.166	31	[1.098]		130/127	0.941	28	1.106	*	131/127	1.128	31	1.12	*	129/128	1.719	31	1.082	*	130/128	1.399
834	gi|16660153	transcriptional coactivator p100 [Gallus gallus]	698	89386	26	23	9	8	15.1	6.03	0.38	Quantitation summary for protein	129/126	1.101	26	1.041	*	130/126	1.218	26	1.054	*	131/126	1.381	26	1.054	*	129/127	0.914	26	[1.158]		130/127	0.988	26	[1.186]		131/127	1.193	26	1.181	*	129/128	1.33	26	[1.118]		130/128	1.451
835	gi|312032354	prolyl 4-hydroxylase subunit alpha-1 isoform 1 precursor [Gallus gallus]	698	72135	29	28	11	10	22.2	5.54	0.71	Quantitation summary for protein	129/126	0.932	29	1.039	*	130/126	1.003	29	1.036		131/126	1.172	29	1.031	*	129/127	0.92	29	[1.106]		130/127	0.968	29	1.12		131/127	1.204	29	[1.121]		129/128	1.17	29	1.051	*	130/128	1.242
836	gi|53130866	hypothetical protein RCJMB04_10k5 [Gallus gallus]	698	33500	45	37	10	9	40.6	5.39	2.41	Quantitation summary for protein	129/126	1.016	40	[1.084]		130/126	0.998	38	1.069		131/126	1.059	40	1.062	*	129/127	0.931	40	1.12	*	130/127	0.9	39	1.175	*	131/127	1.009	40	[1.188]		129/128	1.005	40	[1.101]		130/128	0.982
837	gi|383087734	ribosome-binding protein 1 [Gallus gallus]	698	138715	32	27	15	11	14.6	5.29	0.35	Quantitation summary for protein	129/126	1.431	30	[1.052]		130/126	0.944	30	1.03	*	131/126	1.175	30	[1.028]		129/127	1.543	30	[1.063]		130/127	0.995	30	1.059		131/127	1.369	28	1.054	*	129/128	1.411	30	1.035	*	130/128	0.918
838	gi|53127806	hypothetical protein RCJMB04_3h11 [Gallus gallus]	697	89174	30	29	12	12	17.5	6.71	0.66	Quantitation summary for protein	129/126	1.466	30	[1.046]		130/126	1.277	30	1.038	*	131/126	1.355	30	1.029	*	129/127	1.596	30	1.145	*	130/127	1.359	30	1.13	*	131/127	1.535	30	1.143	*	129/128	1.89	30	1.066	*	130/128	1.624
839	gi|212709	T-cadherin [Gallus gallus]	697	88871	53	41	18	14	24.4	4.91	1.47	Quantitation summary for protein	129/126	0.781	47	[1.106]		130/126	0.868	45	[1.054]		131/126	0.832	47	[1.053]		129/127	1.215	47	[1.199]		130/127	1.325	45	[1.190]		131/127	1.346	47	[1.226]		129/128	0.857	47	[1.106]		130/128	0.94
840	gi|363746217	PREDICTED: NADH dehydrogenase [ubiquinone] iron-sulfur protein 2, mitochondrial-like, partial [Gallus gallus]	696	13450	24	23	3	3	22.4	4.96	5.13	Quantitation summary for protein	129/126	1.105	23	[1.157]		130/126	1.201	22	[1.112]		131/126	0.869	23	1.06	*	129/127	1.795	22	1.195	*	130/127	1.905	22	1.297	*	131/127	1.467	22	[1.278]		129/128	0.994	22	1.188		130/128	1.064
841	gi|53136716	hypothetical protein RCJMB04_32n8 [Gallus gallus]	695	30267	39	27	11	9	56.3	7.03	4.87	Quantitation summary for protein	129/126	0.759	35	[1.118]		130/126	1.048	32	[1.057]		131/126	0.943	35	[1.074]		129/127	0.97	35	1.306		130/127	1.419	31	1.27	*	131/127	1.254	35	[1.418]		129/128	0.784	35	[1.196]		130/128	1.082
842	gi|363733064	PREDICTED: uncharacterized protein LOC100857197 [Gallus gallus]	695	21648	26	21	6	5	42.7	5.16	2.17	Quantitation summary for protein	129/126	1.056	22	1.069	*	130/126	0.953	23	1.048	*	131/126	1.107	23	1.079	*	129/127	1.171	23	1.117	*	130/127	1.029	23	[1.185]		131/127	1.272	23	[1.235]		129/128	0.851	23	[1.150]		130/128	0.754
843	gi|973977	calcium-binding protein [Gallus gallus]	693	23675	27	24	6	6	30.8	9.23	1.88	Quantitation summary for protein	129/126	0.688	26	[1.150]		130/126	1.024	25	1.104		131/126	0.814	26	1.098	*	129/127	0.97	26	[1.231]		130/127	1.383	26	[1.232]		131/127	1.193	26	[1.287]		129/128	0.841	26	1.131	*	130/128	1.211
844	gi|50751077	PREDICTED: microsomal glutathione S-transferase 3 isoform 2 [Gallus gallus]	693	17415	35	28	5	4	18.2	9.42	4.89	Quantitation summary for protein	129/126	1.274	32	[1.106]		130/126	1.307	32	[1.098]		131/126	1.116	32	[1.089]		129/127	2.106	32	1.219	*	130/127	2.113	32	1.301	*	131/127	1.92	32	1.302	*	129/128	1.704	32	1.122	*	130/128	1.725
845	gi|153799357	eukaryotic translation initiation factor 4 gamma 2 isoform 1 [Gallus gallus]	691	119410	33	28	17	15	20.3	6.72	0.67	Quantitation summary for protein	129/126	1.14	32	1.043	*	130/126	1.147	31	[1.040]		131/126	1.216	32	1.036	*	129/127	1.098	32	1.118	*	130/127	1.079	31	1.134	*	131/127	1.218	32	1.141	*	129/128	1.459	32	[1.052]		130/128	1.448
846	gi|2655422	CDC37 [Gallus gallus]	690	54514	38	31	11	8	22.1	5.24	1.27	Quantitation summary for protein	129/126	1.257	11	1.074	*	130/126	1.06	11	1.107		131/126	1.19	10	1.044	*	129/127	1.593	11	1.163	*	130/127	1.313	11	1.188	*	131/127	1.566	11	1.183	*	129/128	1.446	10	1.054	*	130/128	1.312
847	gi|118090079	PREDICTED: inorganic pyrophosphatase 2, mitochondrial [Gallus gallus]	690	59055	32	26	9	9	22.1	8.91	1.26	Quantitation summary for protein	129/126	1.003	28	1.067		130/126	0.923	27	1.07	*	131/126	0.842	28	1.062	*	129/127	0.754	28	[1.225]		130/127	0.662	27	[1.301]		131/127	0.658	28	[1.323]		129/128	0.876	28	1.104	*	130/128	0.79
848	gi|409191	aldolase A, partial [Gallus gallus]	689	5126	21	17	3	2	47.6	6.95	24.53	Quantitation summary for protein	129/126	1.539	19	1.111	*	130/126	0.907	19	1.072	*	131/126	0.999	19	[1.071]		129/127	1.061	19	[1.199]		130/127	0.611	19	[1.364]		131/127	0.716	19	1.388	*	129/128	1.668	19	1.131	*	130/128	0.969
849	gi|53134035	hypothetical protein RCJMB04_22f12 [Gallus gallus]	688	53801	30	26	10	7	29.4	6.06	0.92	Quantitation summary for protein	129/126	0.741	29	1.039	*	130/126	0.724	29	1.056	*	131/126	0.879	27	1.018	*	129/127	1.619	29	1.147	*	130/127	1.546	29	1.147	*	131/127	2.004	29	1.142	*	129/128	1.284	29	[1.095]		130/128	1.237
850	gi|60098357	hypothetical protein RCJMB04_1b12 [Gallus gallus]	687	27750	31	27	7	5	31.3	8.21	1.78	Quantitation summary for protein	129/126	1.011	24	1.072		130/126	1.084	24	[1.069]		131/126	1.099	23	1.037	*	129/127	1.465	23	1.183	*	130/127	1.458	24	1.249	*	131/127	1.566	24	[1.285]		129/128	0.816	24	1.091	*	130/128	0.863
851	gi|363743473	PREDICTED: 60S ribosomal protein L23 isoform 2 [Gallus gallus]	687	18637	24	23	6	6	45.7	10.51	2.78	Quantitation summary for protein	129/126	1.365	24	1.061	*	130/126	1.392	24	1.076	*	131/126	1.274	24	1.068	*	129/127	0.769	24	[1.192]		130/127	0.767	24	[1.222]		131/127	0.747	24	[1.243]		129/128	0.984	24	[1.115]		130/128	0.99
852	gi|50734079	PREDICTED: enoyl-CoA delta isomerase 2, mitochondrial isoform 2 [Gallus gallus]	685	53854	33	27	11	8	27	9.03	1.16	Quantitation summary for protein	129/126	0.993	30	1.153		130/126	1.116	29	1.109	*	131/126	0.971	30	[1.086]		129/127	1.178	30	1.167	*	130/127	1.295	29	1.296	*	131/127	1.199	30	[1.201]		129/128	1.308	30	[1.118]		130/128	1.45
853	gi|34541988	UBP [Gallus gallus]	685	148090	33	25	12	11	13.7	5.37	0.36	Quantitation summary for protein	129/126	1.205	28	1.036	*	130/126	1.037	28	[1.046]		131/126	1.178	28	1.037	*	129/127	1.486	28	1.11	*	130/127	1.25	28	1.121	*	131/127	1.512	28	1.13	*	129/128	1.45	28	1.063	*	130/128	1.231
854	gi|363729116	PREDICTED: importin-5 [Gallus gallus]	685	145224	37	32	17	17	18.4	4.89	0.6	Quantitation summary for protein	129/126	1.717	36	1.07	*	130/126	1.305	36	1.047	*	131/126	1.349	36	[1.043]		129/127	1.847	36	1.124	*	130/127	1.372	36	1.112	*	131/127	1.51	36	1.129	*	129/128	2.017	36	1.093	*	130/128	1.511
855	gi|118083156	PREDICTED: beta-parvin [Gallus gallus]	683	49649	33	23	9	6	31.2	6.05	0.67	Quantitation summary for protein	129/126	1.037	28	[1.045]		130/126	0.854	28	1.06	*	131/126	0.808	27	1.034	*	129/127	1.144	27	[1.145]		130/127	0.921	27	[1.156]		131/127	0.928	27	[1.149]		129/128	0.989	28	1.031		130/128	0.803
856	gi|63781	ribosomal protein S17 (AA 7-135) [Gallus gallus]	683	18093	26	17	7	5	55	9.64	5.56	Quantitation summary for protein	129/126	1.227	22	1.12	*	130/126	0.945	20	1.077	*	131/126	1.078	22	1.1	*	129/127	0.736	22	1.193	*	130/127	0.558	20	[1.293]		131/127	0.672	22	[1.339]		129/128	1.014	22	1.204		130/128	0.771
857	gi|118082712	PREDICTED: mitochondrial import receptor subunit TOM22 homolog [Gallus gallus]	682	26787	27	25	4	4	31.8	4.69	2.24	Quantitation summary for protein	129/126	0.901	24	1.063	*	130/126	1.037	22	1.087		131/126	0.993	25	[1.052]		129/127	1.19	24	1.205	*	130/127	1.544	22	1.281	*	131/127	1.343	24	1.278	*	129/128	1.125	24	1.148	*	130/128	1.369
858	gi|53136198	hypothetical protein RCJMB04_27f19 [Gallus gallus]	676	50614	20	19	6	6	22.5	6.19	0.56	Quantitation summary for protein	129/126	1.145	19	1.092	*	130/126	0.998	17	[1.090]		131/126	1.223	19	1.057	*	129/127	1.731	19	1.168	*	130/127	1.491	17	1.243	*	131/127	1.922	19	[1.248]		129/128	1.398	19	1.106	*	130/128	1.208
859	gi|15077081	actin related protein 3 [Gallus gallus]	674	53347	31	29	11	11	30.9	5.62	1.18	Quantitation summary for protein	129/126	1.101	30	1.044	*	130/126	0.987	30	[1.062]		131/126	1.085	30	1.038	*	129/127	1.418	30	1.111	*	130/127	1.242	30	1.128	*	131/127	1.453	30	1.12	*	129/128	1.263	30	1.078	*	130/128	1.116
860	gi|363743552	PREDICTED: keratin, type I cytoskeletal 42-like [Gallus gallus]	673	53750	39	31	5	4	7.8	4.79	0.92	Quantitation summary for protein	129/126	1.158	16	1.088	*	130/126	1.953	15	1.165	*	131/126	1.109	16	1.094	*	129/127	1.422	15	1.111	*	130/127	1.939	15	1.156	*	131/127	3.932	16	1.528	*	129/128	1.306	16	1.126	*	130/128	2.161
861	gi|53127712	hypothetical protein RCJMB04_3a24 [Gallus gallus]	673	48290	51	30	12	10	34.8	6.19	1.88	Quantitation summary for protein	129/126	0.739	32	1.242	*	130/126	0.824	32	1.158	*	131/126	1.107	32	1.158	*	129/127	3.426	32	1.826	*	130/127	3.735	32	[2.003]		131/127	5.335	32	[2.118]		129/128	1.348	32	[1.367]		130/128	1.482
862	gi|21780320	CAP23 [Gallus gallus]	671	33902	26	24	7	7	39.3	4.66	2.07	Quantitation summary for protein	129/126	0.502	26	1.091	*	130/126	0.703	26	1.071	*	131/126	0.752	26	1.053	*	129/127	1.565	26	1.19	*	130/127	2.14	26	1.23	*	131/127	2.436	26	1.228	*	129/128	0.824	26	[1.081]		130/128	1.137
863	gi|363744612	PREDICTED: UV excision repair protein RAD23 homolog B [Gallus gallus]	671	47560	33	27	12	10	27	4.7	1.39	Quantitation summary for protein	129/126	1.008	30	[1.119]		130/126	0.98	29	1.107		131/126	1.008	30	1.098		129/127	0.756	29	[1.601]		130/127	0.718	28	[1.672]		131/127	0.784	29	[1.844]		129/128	0.792	30	[1.288]		130/128	0.76
864	gi|53128909	hypothetical protein RCJMB04_5e15 [Gallus gallus]	670	75446	31	22	15	11	27.6	9.05	0.98	Quantitation summary for protein	129/126	1.184	22	1.037	*	130/126	1.086	22	[1.044]		131/126	1.29	22	[1.077]		129/127	1.14	22	1.134	*	130/127	1.022	22	1.128		131/127	1.292	22	1.169	*	129/128	1.245	22	1.085	*	130/128	1.126
865	gi|363729205	PREDICTED: cullin-5 [Gallus gallus]	670	116899	44	33	19	16	19.8	8.61	0.69	Quantitation summary for protein	129/126	1.341	40	1.033	*	130/126	1.286	40	1.039	*	131/126	1.204	40	1.019	*	129/127	1.326	40	1.081	*	130/127	1.243	40	1.087	*	131/127	1.238	40	1.086	*	129/128	1.26	40	1.059	*	130/128	1.191
866	gi|755484	cell division cycle control protein 37 [Gallus gallus]	669	35532	33	26	9	6	28.5	5.65	1.23	Quantitation summary for protein	129/126	1.134	5	1.055	*	130/126	1.084	5	1.075		131/126	1.222	5	1.018	*	129/127	1.483	5	1.058	*	130/127	1.386	5	1.05	*	131/127	1.662	5	1.056	*	129/128	1.63	5	1.072	*	130/128	1.538
867	gi|65306315	EF hand-containing protein 1 [Gallus gallus]	668	31321	23	22	8	8	32.8	5.07	1.74	Quantitation summary for protein	129/126	0.647	23	[1.096]		130/126	1.181	23	1.036	*	131/126	1.252	23	1.045	*	129/127	1.138	23	1.133	*	130/127	2.03	23	1.216	*	131/127	2.289	23	[1.245]		129/128	1.008	23	[1.115]		130/128	1.814
868	gi|7619884	muscle derived protein [Gallus gallus]	668	92724	22	22	10	10	16.7	4.91	0.52	Quantitation summary for protein	129/126	1.123	21	1.063	*	130/126	0.951	21	[1.071]		131/126	1.187	21	1.039	*	129/127	1.99	21	1.202	*	130/127	1.646	21	1.23	*	131/127	2.188	21	1.242	*	129/128	2.256	22	[1.125]		130/128	1.885
869	gi|363734138	PREDICTED: acyl-CoA synthetase short-chain family member 1-like [Gallus gallus]	668	85560	27	26	8	7	13.2	7	0.35	Quantitation summary for protein	129/126	1.259	18	1.046	*	130/126	1.344	18	1.056	*	131/126	0.998	18	1.04		129/127	2.371	18	1.089	*	130/127	2.476	18	1.113	*	131/127	1.956	18	1.096	*	129/128	1.793	18	1.052	*	130/128	1.889
870	gi|315583003	pyruvate dehydrogenase kinase, isozyme 1 [Gallus gallus]	668	51609	39	27	11	8	29.9	7.66	1.53	Quantitation summary for protein	129/126	1.194	34	1.055	*	130/126	1.17	31	[1.063]		131/126	1.001	34	1.037		129/127	1.398	33	1.098	*	130/127	1.346	31	[1.143]		131/127	1.222	34	[1.132]		129/128	0.996	34	1.078		130/128	0.962
871	gi|53133287	hypothetical protein RCJMB04_15c3 [Gallus gallus]	667	28539	22	20	9	7	47.4	8.86	2.76	Quantitation summary for protein	129/126	1.355	19	1.047	*	130/126	1.155	21	1.05	*	131/126	1.136	21	[1.077]		129/127	1.349	21	1.27	*	130/127	1.144	21	1.26	*	131/127	1.198	21	1.27	*	129/128	1.558	20	1.082	*	130/128	1.329
872	gi|34604138	phosphohippolin-like protein [Gallus gallus]	665	11293	10	10	2	2	26.3	4.81	1.89	Quantitation summary for protein	129/126	1.171	10	1.047	*	130/126	1.173	9	1.082	*	131/126	0.988	10	1.099		129/127	2.226	9	1.256	*	130/127	2.179	9	1.251	*	131/127	1.81	10	[1.428]		129/128	1.699	10	1.229	*	130/128	1.706
873	gi|363738072	PREDICTED: probable D-lactate dehydrogenase, mitochondrial-like, partial [Gallus gallus]	665	50042	19	19	6	6	15.8	5.94	0.67	Quantitation summary for protein	129/126	1.243	19	[1.076]		130/126	1.096	18	1.085	*	131/126	1.178	19	1.051	*	129/127	0.746	19	1.133	*	130/127	0.643	18	1.172	*	131/127	0.735	19	1.161	*	129/128	1.177	19	1.073	*	130/128	1.024
874	gi|53131892	hypothetical protein RCJMB04_12f9 [Gallus gallus]	664	64277	29	20	11	7	24.3	6.31	0.49	Quantitation summary for protein	129/126	0.814	18	1.052	*	130/126	0.694	14	1.086	*	131/126	0.823	19	1.045	*	129/127	1.547	19	1.278	*	130/127	1.336	14	1.167	*	131/127	1.624	19	1.3	*	129/128	1.081	19	1.102	*	130/128	0.916
875	gi|53130688	hypothetical protein RCJMB04_9h20 [Gallus gallus]	663	26248	28	23	9	8	45.1	4.69	2.74	Quantitation summary for protein	129/126	0.617	27	[1.130]		130/126	0.698	27	[1.097]		131/126	0.795	27	[1.113]		129/127	0.64	25	1.212	*	130/127	0.698	25	1.229	*	131/127	0.84	25	[1.284]		129/128	0.795	27	1.129	*	130/128	0.887
876	gi|363745828	PREDICTED: glutaryl-CoA dehydrogenase, mitochondrial-like, partial [Gallus gallus]	662	28223	28	17	8	6	32.6	6.67	1.44	Quantitation summary for protein	129/126	1.272	20	1.09	*	130/126	0.987	18	[1.098]		131/126	0.976	20	[1.073]		129/127	0.814	20	[1.120]		130/127	0.616	18	1.131	*	131/127	0.65	20	[1.126]		129/128	0.879	20	1.096	*	130/128	0.669
877	gi|363746126	PREDICTED: plasmalemma vesicle-associated protein-like [Gallus gallus]	662	54942	34	24	14	12	28.9	8.96	1.26	Quantitation summary for protein	129/126	1.216	31	1.04	*	130/126	1.184	31	1.053	*	131/126	1.103	31	1.025	*	129/127	1.328	31	1.112	*	130/127	1.264	31	[1.100]		131/127	1.253	31	1.106	*	129/128	0.967	31	1.067	*	130/128	0.929
878	gi|50761912	PREDICTED: protein NipSnap homolog 3A [Gallus gallus]	661	31744	37	32	9	7	32.8	9.46	3.03	Quantitation summary for protein	129/126	0.912	37	[1.089]		130/126	1.165	37	[1.080]		131/126	0.795	37	1.029	*	129/127	1.103	36	1.188	*	130/127	1.371	36	1.26	*	131/127	0.988	36	[1.277]		129/128	0.947	37	1.079	*	130/128	1.193
879	gi|363727685	PREDICTED: early endosome antigen 1 [Gallus gallus]	661	202830	41	25	20	13	14.8	5.58	0.29	Quantitation summary for protein	129/126	1.169	30	1.056	*	130/126	1.064	27	[1.044]		131/126	1.157	30	1.054	*	129/127	1.468	30	1.141	*	130/127	1.315	27	1.136	*	131/127	1.51	30	1.154	*	129/128	1.462	30	1.074	*	130/128	1.315
880	gi|363729245	PREDICTED: NADP-dependent malic enzyme, mitochondrial [Gallus gallus]	660	75727	31	23	14	10	26.6	8.7	0.66	Quantitation summary for protein	129/126	1.218	22	1.067	*	130/126	0.95	21	1.057	*	131/126	0.915	22	[1.040]		129/127	1.534	22	1.228	*	130/127	1.183	21	1.241	*	131/127	1.199	22	1.243	*	129/128	1.462	22	1.098	*	130/128	1.132
881	gi|63898	Zyxin [Gallus gallus]	659	67889	29	27	7	7	24	6.78	0.46	Quantitation summary for protein	129/126	1.001	28	1.073		130/126	0.761	28	1.059	*	131/126	0.939	28	[1.049]		129/127	1.437	28	[1.233]		130/127	1.068	28	[1.226]		131/127	1.403	28	[1.222]		129/128	1.473	28	[1.104]		130/128	1.104
882	gi|363736766	PREDICTED: cytochrome b-c1 complex subunit 6, mitochondrial [Gallus gallus]	658	11716	21	19	5	5	69.8	4.97	5.02	Quantitation summary for protein	129/126	0.9	20	1.199	*	130/126	1.01	18	1.239		131/126	0.798	20	1.212	*	129/127	0.641	17	1.856	*	130/127	0.7	16	2.039		131/127	0.589	17	[1.969]		129/128	0.685	18	1.304	*	130/128	0.776
883	gi|53130414	hypothetical protein RCJMB04_7j3 [Gallus gallus]	657	66299	29	26	14	11	29.8	5.8	0.97	Quantitation summary for protein	129/126	0.961	28	1.062	*	130/126	1.061	23	1.043	*	131/126	1.125	28	1.052	*	129/127	1.063	26	1.187		130/127	1.107	24	1.214	*	131/127	1.296	26	1.238	*	129/128	1.113	28	1.095	*	130/128	1.166
884	gi|53130444	hypothetical protein RCJMB04_7o12 [Gallus gallus]	656	58123	33	29	11	9	25.1	8.38	1.04	Quantitation summary for protein	129/126	0.84	30	1.062	*	130/126	0.928	29	1.037	*	131/126	1.052	30	1.03	*	129/127	1.261	29	1.108	*	130/127	1.383	29	[1.179]		131/127	1.667	30	1.195	*	129/128	1.109	30	1.063	*	130/128	1.209
885	gi|312596901	NADH dehydrogenase [ubiquinone] flavoprotein 3, mitochondrial isoform a precursor [Gallus gallus]	656	51611	24	17	11	9	23.3	6.39	0.75	Quantitation summary for protein	129/126	0.933	16	[1.035]		130/126	1.094	16	1.076	*	131/126	0.907	16	1.055	*	129/127	0.726	16	1.173	*	130/127	0.832	16	1.189	*	131/127	0.734	16	1.222	*	129/128	0.672	16	[1.102]		130/128	0.778
886	gi|3184510	GTPase cRac1A [Gallus gallus]	655	25960	26	22	7	6	30.7	8.77	1.63	Quantitation summary for protein	129/126	1.379	11	1.067	*	130/126	0.932	11	1.083	*	131/126	1.188	10	1.045	*	129/127	0.624	11	1.18	*	130/127	0.412	11	1.243	*	131/127	0.551	11	1.223	*	129/128	1.008	11	1.077		130/128	0.672
887	gi|477661	translation initiation factor eIF-5A II [validated] - chicken (fragment)	655	13069	30	24	7	5	39.2	9.4	4.07	Quantitation summary for protein	129/126	---	0	---		130/126	---	0	---		131/126	---	0	---		129/127	---	0	---		130/127	---	0	---		131/127	---	0	---		129/128	---	0	---		130/128	---
888	gi|363728601	PREDICTED: 1,4-alpha-glucan-branching enzyme [Gallus gallus]	653	99828	32	26	8	7	9.2	7.66	0.34	Quantitation summary for protein	129/126	1.079	30	[1.043]		130/126	0.91	30	1.044	*	131/126	0.988	30	1.019	*	129/127	1.795	29	1.195	*	130/127	1.501	29	[1.184]		131/127	1.704	29	[1.213]		129/128	1.42	30	1.11	*	130/128	1.181
889	gi|53127989	hypothetical protein RCJMB04_4h13 [Gallus gallus]	652	24477	27	23	9	7	48.4	5.65	3.08	Quantitation summary for protein	129/126	1.139	11	1.119	*	130/126	1.101	11	1.086	*	131/126	1.032	11	1.078		129/127	0.757	11	[1.189]		130/127	0.715	11	[1.252]		131/127	0.714	11	[1.244]		129/128	0.939	10	1.052	*	130/128	0.933
890	gi|53131982	hypothetical protein RCJMB04_12i19 [Gallus gallus]	652	48212	40	36	11	9	30.7	8.09	2.08	Quantitation summary for protein	129/126	0.967	40	[1.089]		130/126	0.928	39	1.049	*	131/126	1.202	40	1.06	*	129/127	1.628	39	1.239	*	130/127	1.523	39	1.295	*	131/127	2.1	39	1.333	*	129/128	1.164	40	1.116	*	130/128	1.101
891	gi|118082784	PREDICTED: probable ATP-dependent RNA helicase DDX17 [Gallus gallus]	652	81242	32	29	15	13	22.9	8.85	0.96	Quantitation summary for protein	129/126	1.144	16	1.115	*	130/126	0.815	16	1.108	*	131/126	1.014	16	1.105		129/127	1.549	16	[1.729]		130/127	1.079	16	[1.844]		131/127	1.429	16	[1.765]		129/128	1.575	16	[1.267]		130/128	1.107
892	gi|53136550	hypothetical protein RCJMB04_30j1 [Gallus gallus]	650	83209	30	25	13	11	22.9	5.51	0.72	Quantitation summary for protein	129/126	1.136	22	1.062	*	130/126	1.286	22	1.06	*	131/126	1.416	22	1.038	*	129/127	1.552	22	1.185	*	130/127	1.718	22	1.217	*	131/127	2.012	22	1.249	*	129/128	1.542	22	1.136	*	130/128	1.722
893	gi|53134922	hypothetical protein RCJMB04_24a4 [Gallus gallus]	650	28912	25	24	6	6	33.3	6.37	2.32	Quantitation summary for protein	129/126	0.908	24	[1.087]		130/126	1.003	24	1.058		131/126	1.017	24	[1.077]		129/127	0.866	24	[1.248]		130/127	0.934	24	[1.303]		131/127	1.008	24	[1.306]		129/128	0.73	24	1.217	*	130/128	0.795
894	gi|89274010	chicken-II-type gonadotropin-releasing hormone and full mitochondrial ribosomal protein S26 polycistronic type [Gallus gallus]	649	37346	30	28	8	7	25.8	9.79	1.15	Quantitation summary for protein	129/126	1.027	28	[1.040]		130/126	1.269	28	1.085	*	131/126	1.079	28	[1.043]		129/127	1.221	28	1.087	*	130/127	1.475	28	[1.128]		131/127	1.334	28	[1.136]		129/128	1.058	28	1.056	*	130/128	1.289
895	gi|50756677	PREDICTED: cytochrome c oxidase subunit 6A1, mitochondrial [Gallus gallus]	645	13068	55	39	3	2	38.9	9.44	4.07	Quantitation summary for protein	129/126	1.225	45	[1.100]		130/126	1.116	44	[1.190]		131/126	0.836	45	[1.124]		129/127	1.702	45	[1.192]		130/127	1.517	44	1.228	*	131/127	1.209	45	[1.174]		129/128	0.95	45	[1.094]		130/128	0.854
896	gi|50752811	PREDICTED: ras-related protein Rab-8B [Gallus gallus]	644	27398	34	25	10	6	39.8	5.43	2.15	Quantitation summary for protein	129/126	1.027	10	1.029	*	130/126	1.107	10	1.042	*	131/126	1.066	10	[1.043]		129/127	0.882	10	1.089	*	130/127	0.929	10	1.059	*	131/127	0.952	10	1.127		129/128	0.829	10	1.046	*	130/128	0.881
897	gi|127513	RecName: Full=Ig mu chain C region	643	52723	34	22	11	7	24	6.07	1.34	Quantitation summary for protein	129/126	0.515	28	1.091	*	130/126	0.638	28	1.103	*	131/126	0.606	28	1.091	*	129/127	0.818	28	[1.267]		130/127	0.991	28	[1.313]		131/127	1.001	28	[1.291]		129/128	1.007	28	[1.160]		130/128	1.231
898	gi|53128363	hypothetical protein RCJMB04_4m1 [Gallus gallus]	642	23195	19	17	3	3	23.2	9.73	2.36	Quantitation summary for protein	129/126	0.513	18	1.098	*	130/126	0.797	18	1.069	*	131/126	0.894	18	1.078	*	129/127	0.436	18	1.255	*	130/127	0.662	18	[1.383]		131/127	0.79	18	[1.420]		129/128	0.543	18	1.2	*	130/128	0.832
899	gi|50749993	PREDICTED: glutaredoxin-3 [Gallus gallus]	641	43482	39	29	9	8	26.8	5.47	1.59	Quantitation summary for protein	129/126	1.033	36	1.061	*	130/126	1.019	35	[1.076]		131/126	1.178	36	1.051	*	129/127	2.337	36	1.122	*	130/127	2.254	35	1.134	*	131/127	2.772	36	1.123	*	129/128	1.612	36	1.061	*	130/128	1.571
900	gi|118090004	PREDICTED: 39S ribosomal protein L1, mitochondrial [Gallus gallus]	641	45510	31	24	11	8	30.7	8.89	1.16	Quantitation summary for protein	129/126	0.938	26	[1.078]		130/126	1.125	26	[1.052]		131/126	0.998	26	1.038		129/127	0.829	26	1.142	*	130/127	0.972	26	[1.194]		131/127	0.917	26	[1.202]		129/128	0.951	26	[1.117]		130/128	1.126
901	gi|53127965	hypothetical protein RCJMB04_4g21 [Gallus gallus]	640	47476	30	29	8	7	24.4	5.09	0.83	Quantitation summary for protein	129/126	0.726	30	[1.063]		130/126	0.768	30	1.054	*	131/126	0.803	29	1.032	*	129/127	0.555	30	[1.083]		130/127	0.573	30	[1.138]		131/127	0.639	30	[1.113]		129/128	0.652	30	[1.055]		130/128	0.68
902	gi|211622	alpha-3 collagen type VI [Gallus gallus]	640	376734	32	24	14	12	5.3	6.29	0.14	Quantitation summary for protein	129/126	0.787	27	1.031	*	130/126	0.825	24	1.05	*	131/126	0.838	27	1.026	*	129/127	0.744	27	1.113	*	130/127	0.768	25	1.108	*	131/127	0.825	27	1.128	*	129/128	0.814	27	1.039	*	130/128	0.839
903	gi|115597	RecName: Full=F-actin-capping protein subunit beta isoforms 1 and 2; AltName: Full=Beta-actinin subunit II; AltName: Full=CapZ 36/32; AltName: Full=CapZ B1 and B2	639	36385	46	36	10	9	32.1	5.36	1.84	Quantitation summary for protein	129/126	0.842	14	[1.040]		130/126	0.911	14	1.03	*	131/126	1.129	14	1.021	*	129/127	1.181	14	[1.167]		130/127	1.249	14	[1.183]		131/127	1.646	14	[1.209]		129/128	1.243	14	[1.067]		130/128	1.326
904	gi|17221616	nuclear protein matrin 3 [Gallus gallus]	639	117893	30	23	13	10	16.7	5.79	0.43	Quantitation summary for protein	129/126	0.938	27	1.047	*	130/126	1.069	27	1.049	*	131/126	1.138	27	1.043	*	129/127	1.163	27	[1.187]		130/127	1.296	27	1.179	*	131/127	1.468	27	1.212	*	129/128	1.62	27	1.122	*	130/128	1.82
905	gi|363733121	PREDICTED: peptidyl-prolyl cis-trans isomerase D [Gallus gallus]	638	49790	34	25	12	9	35.9	5.98	1.3	Quantitation summary for protein	129/126	0.951	28	1.036	*	130/126	0.937	28	1.042	*	131/126	1.075	28	1.019	*	129/127	1.617	28	1.147	*	130/127	1.559	28	1.168	*	131/127	1.902	28	[1.174]		129/128	1.302	28	[1.091]		130/128	1.266
906	gi|118091993	PREDICTED: echinoderm microtubule associated protein like 1 isoform 2 [Gallus gallus]	638	102120	36	33	12	11	14.1	6.74	0.51	Quantitation summary for protein	129/126	1.244	33	[1.035]		130/126	1.086	33	1.03	*	131/126	1.054	33	1.026	*	129/127	1.675	33	1.15	*	130/127	1.43	33	[1.165]		131/127	1.476	33	1.167	*	129/128	1.778	33	1.089	*	130/128	1.532
907	gi|53127442	hypothetical protein RCJMB04_2h4 [Gallus gallus]	637	67036	30	27	12	12	25.4	8.81	0.95	Quantitation summary for protein	129/126	1.191	29	1.038	*	130/126	1.146	29	1.043	*	131/126	1.316	29	1.041	*	129/127	1.624	29	1.128	*	130/127	1.527	29	1.132	*	131/127	1.866	29	1.14	*	129/128	1.4	29	1.074	*	130/128	1.329
908	gi|53127702	hypothetical protein RCJMB04_2p21 [Gallus gallus]	636	35374	19	19	5	5	16.3	4.45	0.71	Quantitation summary for protein	129/126	1.095	19	[1.090]		130/126	1.081	18	1.047	*	131/126	1.062	19	[1.035]		129/127	1.698	19	[1.346]		130/127	1.682	18	[1.418]		131/127	1.713	19	[1.453]		129/128	1.346	19	[1.174]		130/128	1.321
909	gi|313747590	tripartite motif-containing protein 55 [Gallus gallus]	635	56750	19	17	6	5	14.7	4.61	0.57	Quantitation summary for protein	129/126	1.048	19	1.041	*	130/126	0.883	19	[1.086]		131/126	1.084	19	1.025	*	129/127	2.082	19	1.192	*	130/127	1.714	19	[1.186]		131/127	2.241	19	1.174	*	129/128	1.679	19	1.134	*	130/128	1.395
910	gi|50731684	PREDICTED: regulator of microtubule dynamics protein 1 [Gallus gallus]	635	39935	28	25	9	8	33.7	7.66	1.4	Quantitation summary for protein	129/126	0.674	26	1.182	*	130/126	0.735	26	1.1	*	131/126	0.856	26	[1.056]		129/127	1.598	26	1.204	*	130/127	1.703	26	1.176	*	131/127	2.11	26	1.176	*	129/128	0.826	26	[1.177]		130/128	0.889
911	gi|60098385	hypothetical protein RCJMB04_1e2 [Gallus gallus]	633	34920	19	17	6	4	24	5.53	0.57	Quantitation summary for protein	129/126	1.1	17	1.055	*	130/126	0.948	17	1.041	*	131/126	1.092	17	1.042	*	129/127	1.412	17	1.09	*	130/127	1.189	17	1.083	*	131/127	1.458	17	1.094	*	129/128	1.165	17	1.043	*	130/128	0.99
912	gi|22218070	ovoglycoprotein precursor [Gallus gallus]	633	24827	41	35	6	6	20.2	5.11	2.11	Quantitation summary for protein	129/126	1.055	36	1.164	*	130/126	1.577	36	[1.080]		131/126	0.818	36	1.084	*	129/127	0.533	35	[1.392]		130/127	0.778	35	[1.553]		131/127	0.429	35	[1.678]		129/128	0.708	36	[1.258]		130/128	1.044
913	gi|46487963	cathelicidin [Gallus gallus]	632	18008	23	20	4	3	27.7	8.24	1.81	Quantitation summary for protein	129/126	1.384	22	[1.066]		130/126	2.331	22	1.08	*	131/126	2.475	22	1.116	*	129/127	0.597	22	1.183	*	130/127	0.984	22	[1.244]		131/127	1.111	22	[1.278]		129/128	0.538	22	[1.174]		130/128	0.893
914	gi|53135834	hypothetical protein RCJMB04_25p23 [Gallus gallus]	632	59610	36	25	18	12	33.3	11.11	2.09	Quantitation summary for protein	129/126	1.492	31	1.124	*	130/126	1.282	31	1.075	*	131/126	1.515	31	1.081	*	129/127	1.08	30	1.29		130/127	0.899	30	1.35		131/127	1.114	30	1.402		129/128	1.61	31	1.151	*	130/128	1.364
915	gi|53130169	hypothetical protein RCJMB04_6i8 [Gallus gallus]	632	45641	28	25	11	9	30.5	6.03	0.88	Quantitation summary for protein	129/126	1.032	25	1.041	*	130/126	1.046	26	1.051	*	131/126	1.19	26	[1.040]		129/127	1.142	26	1.226	*	130/127	1.126	26	[1.219]		131/127	1.363	26	[1.227]		129/128	1.453	26	1.088	*	130/128	1.446
916	gi|63370	unnamed protein product [Gallus gallus]	631	494792	39	31	17	15	6.1	5.79	0.12	Quantitation summary for protein	129/126	1.013	34	1.073		130/126	0.889	29	1.07	*	131/126	1.18	34	[1.078]		129/127	0.99	29	1.165		130/127	0.847	27	1.197	*	131/127	1.206	29	1.212	*	129/128	1.458	32	1.15	*	130/128	1.265
917	gi|118095590	PREDICTED: reticulocalbin-2 [Gallus gallus]	630	39814	19	16	11	8	38.9	4.43	1.22	Quantitation summary for protein	129/126	0.774	17	[1.082]		130/126	0.967	17	1.095		131/126	0.904	17	1.072	*	129/127	1.008	17	[1.222]		130/127	1.186	16	1.261	*	131/127	1.164	16	1.239	*	129/128	0.978	17	1.115		130/128	1.204
918	gi|53130426	hypothetical protein RCJMB04_7m14 [Gallus gallus]	630	103504	33	28	13	13	16.1	5.38	0.6	Quantitation summary for protein	129/126	1.39	31	1.06	*	130/126	1.281	31	1.05	*	131/126	1.237	31	1.047	*	129/127	1.898	31	1.154	*	130/127	1.71	31	1.159	*	131/127	1.757	31	1.188	*	129/128	1.877	31	1.105	*	130/128	1.706
919	gi|126651	RecName: Full=Procollagen-lysine,2-oxoglutarate 5-dioxygenase 1; AltName: Full=Lysyl hydroxylase 1; Short=LH1; Flags: Precursor	627	96007	20	17	7	6	12.6	6.27	0.26	Quantitation summary for protein	129/126	0.843	18	1.039	*	130/126	0.907	18	1.046	*	131/126	1.062	17	1.022	*	129/127	0.904	18	1.188	*	130/127	0.951	18	1.205		131/127	1.182	18	1.217	*	129/128	0.984	17	1.084		130/128	1.045
920	gi|363743385	PREDICTED: LOW QUALITY PROTEIN: 26S proteasome non-ATPase regulatory subunit 11 [Gallus gallus]	627	63139	26	22	13	11	29.1	5.96	1.37	Quantitation summary for protein	129/126	1.088	26	1.057	*	130/126	1.084	25	1.053	*	131/126	1.248	26	1.043	*	129/127	1.095	26	[1.169]		130/127	1.068	25	[1.166]		131/127	1.307	26	1.188	*	129/128	1.325	26	1.111	*	130/128	1.304
921	gi|363732271	PREDICTED: laminin subunit alpha-2 [Gallus gallus]	626	393340	38	32	17	15	6	5.91	0.14	Quantitation summary for protein	129/126	0.863	33	1.061	*	130/126	0.838	33	1.046	*	131/126	0.825	33	[1.036]		129/127	0.81	33	1.1	*	130/127	0.769	33	1.147	*	131/127	0.806	33	[1.123]		129/128	0.889	33	1.046	*	130/128	0.851
922	gi|995778	cThy28kD [Gallus gallus]	626	35396	39	29	11	9	40.5	8.32	1.93	Quantitation summary for protein	129/126	0.822	37	1.056	*	130/126	1.014	37	1.071		131/126	0.931	37	1.036	*	129/127	0.885	37	[1.246]		130/127	1.067	37	[1.268]		131/127	1.042	37	[1.294]		129/128	0.956	37	[1.183]		130/128	1.164
923	gi|2708707	laminin beta 2-like chain [Gallus gallus]	625	211032	27	22	12	9	7.6	7	0.18	Quantitation summary for protein	129/126	1.036	13	1.03	*	130/126	0.868	15	1.071	*	131/126	0.924	15	1.055	*	129/127	0.823	15	1.058	*	130/127	0.645	15	1.112	*	131/127	0.73	15	1.084	*	129/128	0.839	15	1.061	*	130/128	0.75
924	gi|60098591	hypothetical protein RCJMB04_3o5 [Gallus gallus]	625	103505	26	21	8	7	12.4	6.19	0.32	Quantitation summary for protein	129/126	1.249	26	1.025	*	130/126	1.1	26	[1.036]		131/126	1.152	26	1.022	*	129/127	1.043	26	[1.078]		130/127	0.898	26	[1.097]		131/127	1.001	26	[1.094]		129/128	1.215	26	[1.041]		130/128	1.056
925	gi|193880585	eukaryotic translation elongation factor 2, partial [Gallus gallus]	624	27241	41	31	12	9	59	9.21	6.14	Quantitation summary for protein	129/126	1.267	6	1.067	*	130/126	0.996	4	1.01		131/126	1.151	6	1.049	*	129/127	0.728	6	1.159	*	130/127	0.559	6	1.161	*	131/127	0.688	6	1.206	*	129/128	1.178	6	1.117	*	130/128	0.913
926	gi|118093380	PREDICTED: serum deprivation-response protein [Gallus gallus]	622	51312	43	27	12	10	34.7	5.02	2.07	Quantitation summary for protein	129/126	0.605	34	1.143	*	130/126	0.65	27	1.095	*	131/126	0.564	33	1.1	*	129/127	0.727	33	[1.526]		130/127	0.937	26	1.42		131/127	0.71	32	[1.553]		129/128	0.741	34	[1.235]		130/128	0.786
927	gi|63705	unnamed protein product [Gallus gallus]	622	41090	27	23	9	9	24.5	4.66	1.17	Quantitation summary for protein	129/126	0.85	23	[1.099]		130/126	0.862	22	1.069	*	131/126	1.222	23	1.061	*	129/127	0.98	23	[1.257]		130/127	0.966	22	[1.285]		131/127	1.465	23	[1.346]		129/128	1.076	23	[1.141]		130/128	1.121
928	gi|2506056	calpain small subunit [Gallus gallus]	620	26076	25	19	12	10	67.8	5.05	4.4	Quantitation summary for protein	129/126	0.964	23	1.123		130/126	1.066	21	1.195		131/126	0.93	23	1.119	*	129/127	1.204	23	[1.334]		130/127	1.307	21	1.444	*	131/127	1.208	23	1.385	*	129/128	1.132	23	1.23	*	130/128	1.238
929	gi|53130998	hypothetical protein RCJMB04_11a23 [Gallus gallus]	619	24898	26	22	6	5	39.2	5.75	2.11	Quantitation summary for protein	129/126	0.742	15	1.07	*	130/126	0.863	15	1.125	*	131/126	0.935	15	1.082	*	129/127	2.949	15	[1.423]		130/127	3.355	15	[1.551]		131/127	3.867	15	[1.473]		129/128	1.644	15	1.14	*	130/128	1.887
930	gi|28866785	Surf1 [Gallus gallus]	619	40113	38	27	9	8	31.1	9.77	1.59	Quantitation summary for protein	129/126	1.177	37	[1.050]		130/126	1.137	36	1.034	*	131/126	1.09	37	[1.031]		129/127	1.315	37	[1.116]		130/127	1.27	36	[1.121]		131/127	1.266	37	[1.154]		129/128	1.218	37	[1.092]		130/128	1.186
931	gi|127095	RecName: Full=Myeloid protein 1; AltName: Full=p33; Flags: Precursor	618	39849	26	22	10	8	42.3	8.73	1.4	Quantitation summary for protein	129/126	1.42	23	1.112	*	130/126	1.59	23	1.119	*	131/126	1.481	23	1.113	*	129/127	0.915	23	[1.179]		130/127	1.002	23	[1.209]		131/127	0.993	23	1.179		129/128	1.023	23	1.085		130/128	1.129
932	gi|363741770	PREDICTED: junctophilin-2 [Gallus gallus]	617	57300	22	19	6	4	10.8	9.22	0.56	Quantitation summary for protein	129/126	1.111	19	1.057	*	130/126	0.943	19	1.082	*	131/126	0.97	19	1.055	*	129/127	0.669	19	1.101	*	130/127	0.555	19	1.187	*	131/127	0.607	19	1.162	*	129/128	1.064	19	1.072	*	130/128	0.891
933	gi|53136315	hypothetical protein RCJMB04_27j21 [Gallus gallus]	617	60504	27	21	11	8	25.1	5.23	0.89	Quantitation summary for protein	129/126	1.01	22	1.062		130/126	1.047	22	1.056	*	131/126	1.249	22	1.053	*	129/127	1.364	21	1.245	*	130/127	1.389	21	1.242	*	131/127	1.745	21	1.297	*	129/128	1.41	22	1.123	*	130/128	1.44
934	gi|363745994	PREDICTED: NADH dehydrogenase [ubiquinone] iron-sulfur protein 2, mitochondrial-like [Gallus gallus]	616	16462	28	24	6	5	52.8	7.79	3.48	Quantitation summary for protein	129/126	0.8	27	1.109	*	130/126	0.894	27	1.117	*	131/126	0.903	27	1.125	*	129/127	1.352	27	[1.290]		130/127	1.477	27	[1.418]		131/127	1.587	27	[1.437]		129/128	1.161	27	1.212	*	130/128	1.28
935	gi|53127125	hypothetical protein RCJMB04_1j5 [Gallus gallus]	616	57508	30	18	9	7	22.5	5.11	0.74	Quantitation summary for protein	129/126	0.917	19	[1.079]		130/126	1.25	19	1.128	*	131/126	0.96	20	[1.064]		129/127	0.648	19	[1.359]		130/127	0.864	19	[1.452]		131/127	0.7	20	[1.450]		129/128	0.898	19	[1.181]		130/128	1.208
936	gi|363741140	PREDICTED: 60S ribosomal protein L23a [Gallus gallus]	616	24749	30	20	7	6	34.2	10.44	4.19	Quantitation summary for protein	129/126	0.877	26	[1.088]		130/126	0.864	25	[1.095]		131/126	0.855	26	[1.097]		129/127	0.736	26	[1.778]		130/127	0.725	25	[1.678]		131/127	0.747	26	[1.709]		129/128	1.002	26	[1.317]		130/128	0.978
937	gi|53130129	hypothetical protein RCJMB04_6h13 [Gallus gallus]	612	47236	27	23	12	11	29.1	5.07	1.75	Quantitation summary for protein	129/126	0.967	26	[1.113]		130/126	0.897	26	[1.066]		131/126	1.006	26	1.05		129/127	1.08	26	[1.448]		130/127	0.979	26	[1.472]		131/127	1.168	26	[1.510]		129/128	1.098	26	[1.192]		130/128	1.004
938	gi|60098597	hypothetical protein RCJMB04_3o20 [Gallus gallus]	612	19404	27	23	7	5	51.3	6.74	4.8	Quantitation summary for protein	129/126	0.823	26	1.073	*	130/126	0.927	25	1.112	*	131/126	0.9	26	1.063	*	129/127	1.31	25	1.265	*	130/127	1.448	24	1.216	*	131/127	1.488	25	1.305	*	129/128	1.116	25	1.126	*	130/128	1.239
939	gi|53130886	hypothetical protein RCJMB04_10n18 [Gallus gallus]	612	32855	41	34	13	10	29	4.9	2.17	Quantitation summary for protein	129/126	0.677	30	1.048	*	130/126	0.829	30	1.041	*	131/126	0.939	30	[1.033]		129/127	2.289	29	1.136	*	130/127	2.397	30	[1.159]		131/127	2.89	30	[1.181]		129/128	1.329	30	1.097	*	130/128	1.67
940	gi|53132618	hypothetical protein RCJMB04_13l2 [Gallus gallus]	609	56491	40	31	12	10	22.7	5.81	1.34	Quantitation summary for protein	129/126	1.009	35	[1.057]		130/126	1.077	34	[1.035]		131/126	1.244	35	[1.041]		129/127	1.624	35	[1.110]		130/127	1.694	34	1.182	*	131/127	2.083	35	1.196	*	129/128	1.497	35	[1.073]		130/128	1.576
941	gi|289819	(Na+,K+)-ATPase-beta-2 subunit [Gallus gallus]	609	37680	31	27	9	7	31.4	8.08	1.53	Quantitation summary for protein	129/126	1.139	29	1.029	*	130/126	1.38	29	[1.038]		131/126	1.298	29	1.023	*	129/127	2.005	29	[1.164]		130/127	2.374	29	[1.188]		131/127	2.377	29	[1.179]		129/128	1.525	29	1.073	*	130/128	1.823
942	gi|118090429	PREDICTED: sorbin and SH3 domain-containing protein 2 [Gallus gallus]	606	154166	26	22	13	9	13.2	8.77	0.29	Quantitation summary for protein	129/126	0.84	24	1.055	*	130/126	0.822	24	1.068	*	131/126	1.154	24	1.039	*	129/127	0.914	24	[1.144]		130/127	0.874	24	1.118	*	131/127	1.305	24	1.136	*	129/128	0.9	24	1.058	*	130/128	0.868
943	gi|115579	RecName: Full=F-actin-capping protein subunit alpha-2; AltName: Full=Beta-actinin subunit I; AltName: Full=CapZ 36/32	605	38209	21	17	4	4	24.1	5.54	1.3	Quantitation summary for protein	129/126	0.834	12	1.086	*	130/126	0.954	9	1.046	*	131/126	0.881	11	1.051	*	129/127	0.523	11	1.113	*	130/127	0.687	9	1.221	*	131/127	0.544	11	1.13	*	129/128	0.814	12	[1.072]		130/128	0.919
944	gi|50745986	PREDICTED: prefoldin subunit 3 [Gallus gallus]	605	27640	36	29	13	11	62	6.01	3.92	Quantitation summary for protein	129/126	0.902	32	[1.047]		130/126	0.968	32	1.06	*	131/126	1.137	32	1.055	*	129/127	1.113	32	1.163	*	130/127	1.168	32	1.216	*	131/127	1.459	32	1.239	*	129/128	1.07	32	1.116	*	130/128	1.133
945	gi|363738452	PREDICTED: guanylate-binding protein 4-like [Gallus gallus]	602	77049	21	17	8	7	13.3	5.63	0.46	Quantitation summary for protein	129/126	0.786	20	1.059	*	130/126	0.782	17	1.059	*	131/126	0.811	20	[1.077]		129/127	1.031	20	[1.212]		130/127	1.024	18	[1.288]		131/127	1.298	19	1.216	*	129/128	0.765	20	[1.156]		130/128	0.761
946	gi|363732251	PREDICTED: glutathione S-transferase-like [Gallus gallus]	602	30477	41	31	12	10	47.5	7.85	5.43	Quantitation summary for protein	129/126	0.745	13	1.118	*	130/126	0.786	12	[1.070]		131/126	0.675	13	1.121	*	129/127	0.319	13	[1.431]		130/127	1.066	12	1.149		131/127	0.301	13	[1.427]		129/128	0.596	13	[1.204]		130/128	0.956
947	gi|118094906	PREDICTED: serine/threonine-protein kinase PAK 2 isoform 2 [Gallus gallus]	602	69253	26	24	10	8	20.2	5.57	0.45	Quantitation summary for protein	129/126	1.039	20	1.016	*	130/126	1.017	20	1.025	*	131/126	1.082	20	1.01	*	129/127	0.871	20	[1.055]		130/127	0.833	20	[1.056]		131/127	0.944	20	[1.055]		129/128	0.934	20	[1.044]		130/128	0.879
948	gi|161513287	immunoglobulin heavy chain variable region [Gallus gallus]	601	13704	22	21	4	4	34.7	6.81	3.77	Quantitation summary for protein	129/126	---	0	---		130/126	---	0	---		131/126	---	0	---		129/127	---	0	---		130/127	---	0	---		131/127	---	0	---		129/128	---	0	---		130/128	---
949	gi|310750337	proteasome subunit alpha type-4 [Gallus gallus]	599	35722	24	19	9	8	36.4	6.92	1.22	Quantitation summary for protein	129/126	0.883	21	1.042	*	130/126	1.091	20	1.074	*	131/126	1.192	21	1.024	*	129/127	1.47	21	1.221	*	130/127	1.776	20	1.245	*	131/127	2.065	21	1.241	*	129/128	1.064	21	[1.091]		130/128	1.295
950	gi|53132771	hypothetical protein RCJMB04_13p14 [Gallus gallus]	598	72877	32	24	11	9	19.5	5.79	0.62	Quantitation summary for protein	129/126	1.342	25	1.079	*	130/126	1.261	25	[1.072]		131/126	1.369	25	[1.050]		129/127	1.157	25	1.157	*	130/127	1.062	25	1.209		131/127	1.227	25	1.241	*	129/128	1.469	25	1.078	*	130/128	1.361
951	gi|53126839	hypothetical protein RCJMB04_1g23 [Gallus gallus]	598	63264	24	20	11	11	24.6	5.43	1.03	Quantitation summary for protein	129/126	1.038	23	[1.075]		130/126	0.981	23	1.092		131/126	0.993	22	1.045		129/127	0.698	23	[1.127]		130/127	0.645	23	1.174	*	131/127	0.698	23	[1.164]		129/128	1.031	23	1.07	*	130/128	0.962
952	gi|50751398	PREDICTED: cAMP-dependent protein kinase catalytic subunit beta [Gallus gallus]	597	54263	22	19	8	6	18.8	8.55	0.7	Quantitation summary for protein	129/126	1.185	20	1.056	*	130/126	1.125	20	1.056	*	131/126	1.164	20	1.032	*	129/127	2.125	20	[1.156]		130/127	1.971	20	1.18	*	131/127	2.171	20	1.192	*	129/128	1.56	20	1.106	*	130/128	1.461
953	gi|363733087	PREDICTED: kynurenine/alpha-aminoadipate aminotransferase, mitochondrial [Gallus gallus]	596	54248	22	20	11	11	32	8.68	1.15	Quantitation summary for protein	129/126	0.944	21	[1.178]		130/126	1.05	21	[1.164]		131/126	0.894	21	[1.159]		129/127	0.787	21	1.275	*	130/127	0.856	21	1.4	*	131/127	0.775	21	1.39	*	129/128	0.829	21	1.142	*	130/128	0.909
954	gi|118099767	PREDICTED: beta-2-glycoprotein 1 [Gallus gallus]	595	45568	28	25	8	7	26.6	8.6	0.88	Quantitation summary for protein	129/126	0.849	27	1.067	*	130/126	0.892	27	1.071	*	131/126	0.672	27	[1.094]		129/127	0.702	27	[1.299]		130/127	0.721	27	[1.329]		131/127	0.578	27	[1.389]		129/128	0.791	27	[1.127]		130/128	0.819
955	gi|994708	angiotensin converting enzyme, partial [Gallus gallus]	592	154974	30	23	12	10	12.7	5.4	0.28	Quantitation summary for protein	129/126	0.926	26	1.037	*	130/126	0.899	28	1.053	*	131/126	0.792	28	1.042	*	129/127	0.673	28	1.177	*	130/127	0.678	28	1.218	*	131/127	0.635	28	1.226	*	129/128	0.734	28	1.077	*	130/128	0.747
956	gi|50732996	PREDICTED: uncharacterized protein LOC420765 [Gallus gallus]	591	28747	20	18	6	5	29.1	6.66	0.93	Quantitation summary for protein	129/126	0.932	8	1.019	*	130/126	0.908	7	1.018	*	131/126	0.868	9	[1.032]		129/127	2.264	9	1.178	*	130/127	2.019	9	1.166	*	131/127	2.209	9	1.157	*	129/128	1.149	9	1.035	*	130/128	1.034
957	gi|50754991	PREDICTED: 39S ribosomal protein L22, mitochondrial [Gallus gallus]	591	29347	26	23	9	8	36.5	9.98	2.27	Quantitation summary for protein	129/126	1.023	24	1.054	*	130/126	1.104	23	1.035	*	131/126	1.092	24	[1.038]		129/127	0.886	24	1.134	*	130/127	0.923	24	[1.171]		131/127	0.984	24	[1.184]		129/128	0.944	24	1.084	*	130/128	0.993
958	gi|50745672	PREDICTED: uncharacterized protein LOC422200 [Gallus gallus]	590	20781	21	20	7	6	29.6	9.71	2.32	Quantitation summary for protein	129/126	0.949	20	1.086	*	130/126	0.899	19	1.044	*	131/126	0.926	20	1.043	*	129/127	2.11	20	1.182	*	130/127	1.953	19	1.202	*	131/127	2.14	20	1.214	*	129/128	1.399	19	1.064	*	130/128	1.283
959	gi|118091246	PREDICTED: 60S ribosomal protein L27a [Gallus gallus]	590	21266	29	24	6	5	38.5	10.86	2.22	Quantitation summary for protein	129/126	1.221	28	[1.105]		130/126	1.266	28	1.107	*	131/126	1.294	28	1.078	*	129/127	1.07	28	1.178	*	130/127	1.085	28	1.316		131/127	1.179	28	1.292	*	129/128	1.368	28	1.146	*	130/128	1.399
960	gi|310772242	CD99 antigen precursor [Gallus gallus]	589	20994	16	14	4	3	36.4	4.81	1.1	Quantitation summary for protein	129/126	0.666	12	1.224	*	130/126	0.765	10	1.054	*	131/126	0.733	13	[1.165]		129/127	0.665	8	1.143	*	130/127	0.688	8	1.211	*	131/127	0.679	8	1.096	*	129/128	0.549	10	1.138	*	130/128	0.602
961	gi|312458511	ADP-ribosyl cyclase CD157 [Gallus gallus]	587	39284	18	18	3	3	9.5	5.39	0.27	Quantitation summary for protein	129/126	0.958	17	1.035	*	130/126	1.046	17	1.066	*	131/126	0.851	18	1.063	*	129/127	0.917	16	1.041	*	130/127	1.001	17	1.056		131/127	0.864	18	1.071	*	129/128	0.685	18	1.052	*	130/128	0.745
962	gi|60098467	hypothetical protein RCJMB04_2k8 [Gallus gallus]	587	28491	26	19	8	5	35.7	9.17	1.7	Quantitation summary for protein	129/126	1.325	4	1.075	*	130/126	1.031	3	[1.128]		131/126	0.961	4	1.027		129/127	0.845	4	1.137		130/127	0.649	3	1.117	*	131/127	0.637	4	1.074	*	129/128	1.003	4	1.109		130/128	0.777
963	gi|68159406	20-hydroxysteroid dehydrogenase [Gallus gallus]	587	35791	29	21	10	8	36.2	8.5	2.17	Quantitation summary for protein	129/126	1.141	25	1.091	*	130/126	1.184	23	1.081	*	131/126	1.106	25	1.078	*	129/127	1.108	25	[1.211]		130/127	1.125	23	1.291	*	131/127	1.117	25	1.294	*	129/128	0.923	25	[1.103]		130/128	0.944
964	gi|363731358	PREDICTED: uncharacterized protein LOC421634 [Gallus gallus]	587	38355	19	17	7	7	23.6	4.21	0.94	Quantitation summary for protein	129/126	1.187	19	[1.109]		130/126	1.041	19	1.081	*	131/126	1.112	19	1.063	*	129/127	1.321	19	[1.214]		130/127	1.132	19	1.295		131/127	1.287	19	1.338	*	129/128	1.176	19	1.122	*	130/128	1.017
965	gi|311771659	cytochrome c oxidase subunit 7A2, mitochondrial [Gallus gallus]	586	11194	23	19	3	3	30.1	10.16	5.53	Quantitation summary for protein	129/126	0.982	21	[1.120]		130/126	1.028	21	1.067		131/126	0.869	21	[1.090]		129/127	1.023	21	1.179		130/127	1.047	21	[1.275]		131/127	0.942	21	[1.324]		129/128	0.703	21	1.077	*	130/128	0.727
966	gi|363744215	PREDICTED: 28S ribosomal protein S36, mitochondrial [Gallus gallus]	585	13472	37	36	4	4	39.3	10.27	5.13	Quantitation summary for protein	129/126	0.787	35	1.061	*	130/126	0.825	35	1.091	*	131/126	0.797	36	1.061	*	129/127	1.255	36	[1.307]		130/127	1.29	35	[1.309]		131/127	1.323	36	[1.309]		129/128	0.833	36	1.104	*	130/128	0.863
967	gi|118087061	PREDICTED: lactamase, beta 2 [Gallus gallus]	583	36414	21	18	8	7	37.8	6.13	1.39	Quantitation summary for protein	129/126	0.812	20	[1.163]		130/126	0.967	20	1.081		131/126	1.06	19	1.043	*	129/127	0.926	20	1.282		130/127	1.077	20	1.411		131/127	1.251	20	1.453	*	129/128	0.895	20	1.23	*	130/128	1.052
968	gi|12958	unnamed protein product [Gallus gallus]	583	7289	18	17	2	2	50	10.29	2.27	Quantitation summary for protein	129/126	1.087	17	[1.051]		130/126	1.286	17	[1.070]		131/126	1.065	17	1.02	*	129/127	1.747	17	1.059	*	130/127	2.02	17	1.074	*	131/127	1.78	17	1.102	*	129/128	1.206	17	1.026	*	130/128	1.408
969	gi|53760555	cytoplasmic activation- proliferation-associated protein 1 [Gallus gallus]	583	84756	18	16	6	6	10.4	5.08	0.35	Quantitation summary for protein	129/126	1.08	18	[1.044]		130/126	0.882	18	1.082	*	131/126	1.218	18	1.054	*	129/127	1.383	18	1.138	*	130/127	1.104	18	1.157	*	131/127	1.622	18	1.155	*	129/128	1.525	18	1.072	*	130/128	1.228
970	gi|63472	unnamed protein product [Gallus gallus]	583	14110	38	32	9	8	63.1	11.36	15.7	Quantitation summary for protein	129/126	0.611	33	1.093	*	130/126	0.535	33	1.095	*	131/126	0.522	34	1.064	*	129/127	0.76	33	1.186	*	130/127	0.65	33	1.199	*	131/127	0.671	33	[1.245]		129/128	0.776	33	[1.149]		130/128	0.669
971	gi|161513243	immunoglobulin heavy chain variable region [Gallus gallus]	582	14347	19	17	5	5	42.9	5.55	3.45	Quantitation summary for protein	129/126	---	0	---		130/126	---	0	---		131/126	---	0	---		129/127	---	0	---		130/127	---	0	---		131/127	---	0	---		129/128	---	0	---		130/128	---
972	gi|50749406	PREDICTED: eukaryotic translation initiation factor 3 subunit F [Gallus gallus]	581	38099	12	12	4	4	16.3	5.34	0.65	Quantitation summary for protein	129/126	0.894	11	1.036	*	130/126	0.973	12	1.075		131/126	1.093	12	1.063	*	129/127	0.66	12	[1.196]		130/127	0.699	12	1.141	*	131/127	0.835	12	1.165	*	129/128	1.057	12	1.126		130/128	1.13
973	gi|118083201	PREDICTED: 28S ribosomal protein S35, mitochondrial isoform 2 [Gallus gallus]	580	44063	21	20	10	9	33.5	8.66	1.56	Quantitation summary for protein	129/126	0.952	21	1.085	*	130/126	1.102	21	1.058	*	131/126	1.121	21	1.048	*	129/127	0.843	21	1.148	*	130/127	0.954	21	1.238		131/127	1.033	21	1.248		129/128	1.046	21	1.087	*	130/128	1.195
974	gi|60099049	hypothetical protein RCJMB04_21c16 [Gallus gallus]	579	14850	28	20	11	8	86	5.07	5.38	Quantitation summary for protein	129/126	0.584	22	1.173	*	130/126	0.662	22	[1.137]		131/126	0.72	22	1.09	*	129/127	0.457	22	1.329	*	130/127	0.507	22	1.435	*	131/127	0.586	22	1.515	*	129/128	0.584	21	1.143	*	130/128	0.639
975	gi|313851076	synaptosomal-associated protein 23 [Gallus gallus]	579	26394	19	17	9	7	46.9	4.9	2.7	Quantitation summary for protein	129/126	0.991	18	1.096		130/126	1.216	18	1.116	*	131/126	1.107	18	1.129	*	129/127	0.988	18	1.212		130/127	1.186	18	1.294	*	131/127	1.148	18	1.357		129/128	0.839	18	[1.146]		130/128	1.015
976	gi|363730689	PREDICTED: ras-related protein Rab-12 [Gallus gallus]	578	32928	32	27	9	9	38.8	8.46	1.87	Quantitation summary for protein	129/126	1.103	24	1.085	*	130/126	1.265	23	1.044	*	131/126	1.159	23	1.036	*	129/127	1.568	24	1.134	*	130/127	1.773	23	1.154	*	131/127	1.715	24	1.183	*	129/128	0.929	25	[1.084]		130/128	1.051
977	gi|118093267	PREDICTED: putative methyltransferase DDB_G0268948 isoform 1 [Gallus gallus]	578	35224	17	13	8	7	24.7	6	1.25	Quantitation summary for protein	129/126	1.373	13	1.093	*	130/126	1.045	13	1.074	*	131/126	1.013	13	1.049		129/127	1.497	13	[1.386]		130/127	1.113	13	1.394		131/127	1.149	13	[1.432]		129/128	1.764	13	1.185	*	130/128	1.323
978	gi|461496478	40S ribosomal protein S2 [Gallus gallus]	577	36669	40	37	12	12	38.1	10.25	2.36	Quantitation summary for protein	129/126	1.385	39	1.052	*	130/126	1.204	39	1.043	*	131/126	1.193	39	[1.042]		129/127	1.481	39	1.136	*	130/127	1.259	39	1.151	*	131/127	1.327	39	1.164	*	129/128	1.454	39	1.058	*	130/128	1.247
979	gi|12381879	ribosomal protein L36 [Gallus gallus]	576	16527	29	24	7	6	37.1	11.34	3.44	Quantitation summary for protein	129/126	1.202	24	[1.042]		130/126	0.997	24	1.063		131/126	1.123	24	1.038	*	129/127	1.326	24	[1.195]		130/127	1.075	24	1.183	*	131/127	1.288	24	[1.208]		129/128	1.494	24	[1.083]		130/128	1.222
980	gi|240849463	acyl-protein thioesterase 2 [Gallus gallus]	576	28876	30	26	8	8	37.1	7.08	1.67	Quantitation summary for protein	129/126	1.209	27	[1.211]		130/126	1.155	26	1.148	*	131/126	1.087	27	1.182	*	129/127	1.819	27	1.718	*	130/127	1.698	27	[2.127]		131/127	1.703	23	1.522	*	129/128	1.024	17	1.11		130/128	0.966
981	gi|363737229	PREDICTED: LOW QUALITY PROTEIN: guanine nucleotide-binding protein subunit beta-4 [Gallus gallus]	575	41565	25	21	5	3	12.3	5.84	0.58	Quantitation summary for protein	129/126	1.392	3	1.028	*	130/126	1.085	3	1.071		131/126	1.117	3	1.025	*	129/127	2.165	3	1.046	*	130/127	1.65	3	1.08	*	131/127	1.807	3	1.029	*	129/128	1.548	3	1.08	*	130/128	1.191
982	gi|53133542	hypothetical protein RCJMB04_17k23 [Gallus gallus]	573	33156	29	22	13	9	49.4	6.92	1.85	Quantitation summary for protein	129/126	1.316	18	1.057	*	130/126	0.953	17	1.06	*	131/126	1.127	18	1.056	*	129/127	1.331	18	[1.237]		130/127	0.939	18	1.266		131/127	1.185	18	[1.268]		129/128	1.26	18	1.098	*	130/128	0.897
983	gi|53129746	hypothetical protein RCJMB04_6b22 [Gallus gallus]	573	33274	20	16	8	5	30.6	4.93	1.59	Quantitation summary for protein	129/126	0.985	17	1.059		130/126	0.992	15	1.035		131/126	0.984	17	[1.053]		129/127	0.913	17	[1.181]		130/127	0.898	16	[1.185]		131/127	0.949	17	[1.194]		129/128	0.81	17	[1.112]		130/128	0.821
984	gi|363732084	PREDICTED: glutamyl-tRNA(Gln) amidotransferase subunit A, mitochondrial [Gallus gallus]	572	63839	37	31	12	9	31.9	6.11	0.92	Quantitation summary for protein	129/126	1.11	32	[1.042]		130/126	0.996	29	1.049		131/126	1.132	32	1.039	*	129/127	1.227	32	[1.151]		130/127	1.092	29	[1.106]		131/127	1.301	32	1.138	*	129/128	1.172	32	1.071	*	130/128	1.043
985	gi|118091958	PREDICTED: alpha-1-antiproteinase 2 [Gallus gallus]	572	56642	24	17	9	6	22.1	6.71	0.97	Quantitation summary for protein	129/126	0.805	21	[1.220]		130/126	0.842	21	1.1	*	131/126	0.758	21	1.09	*	129/127	1.052	20	1.323		130/127	1.005	21	[1.516]		131/127	0.963	21	[1.516]		129/128	1.064	20	1.158		130/128	1.07
986	gi|422672	caveolin - chicken	571	25935	32	29	6	6	29.5	7.12	2.78	Quantitation summary for protein	129/126	0.941	25	1.091	*	130/126	0.971	25	1.057	*	131/126	0.88	25	[1.075]		129/127	1.296	25	[1.209]		130/127	1.306	25	[1.295]		131/127	1.26	25	[1.330]		129/128	0.839	25	[1.231]		130/128	0.853
987	gi|5509946	p32 subunit of splicing factor SF2 [Gallus gallus]	571	27449	40	26	7	7	30.9	4.41	3.44	Quantitation summary for protein	129/126	0.624	29	1.219	*	130/126	0.87	28	1.075	*	131/126	1.117	29	[1.136]		129/127	2.756	27	[1.508]		130/127	3.838	26	[1.715]		131/127	5.128	27	[1.866]		129/128	1.4	29	[1.233]		130/128	1.942
988	gi|53130752	hypothetical protein RCJMB04_9n21 [Gallus gallus]	570	45435	31	27	14	13	36.5	6.48	1.87	Quantitation summary for protein	129/126	0.865	28	1.103	*	130/126	0.923	28	1.073	*	131/126	0.901	28	1.064	*	129/127	1.036	28	1.299		130/127	1.081	28	1.333		131/127	1.123	28	1.352		129/128	0.958	28	[1.177]		130/128	1.009
989	gi|118101790	PREDICTED: peptidyl-prolyl cis-trans isomerase E [Gallus gallus]	569	39598	25	21	10	8	36.2	5.43	1.42	Quantitation summary for protein	129/126	0.989	18	1.119		130/126	0.983	18	1.114		131/126	1.074	17	1.064	*	129/127	1.185	18	[1.386]		130/127	1.151	18	1.465		131/127	1.335	18	[1.493]		129/128	1.111	18	1.187	*	130/128	1.089
990	gi|72385299	5~-AMP-activated protein kinase gamma-1 non-catalytic subunit variant 1 [Gallus gallus]	568	38553	14	14	6	6	22.8	6.8	0.78	Quantitation summary for protein	129/126	0.958	12	1.029	*	130/126	0.882	13	1.045	*	131/126	0.987	14	[1.042]		129/127	2.269	13	1.107	*	130/127	2.047	13	1.136	*	131/127	2.439	14	1.133	*	129/128	1.382	13	[1.077]		130/128	1.258
991	gi|53132650	hypothetical protein RCJMB04_13l14 [Gallus gallus]	567	24531	24	20	11	9	64.3	5.05	2.59	Quantitation summary for protein	129/126	0.947	22	[1.038]		130/126	0.936	22	1.049	*	131/126	1.005	22	1.035		129/127	1.296	22	1.068	*	130/127	1.253	22	1.085	*	131/127	1.431	22	1.072	*	129/128	1.14	22	1.055	*	130/128	1.112
992	gi|118092337	PREDICTED: l-2-hydroxyglutarate dehydrogenase, mitochondrial [Gallus gallus]	566	54477	23	22	6	6	20.4	8.19	0.6	Quantitation summary for protein	129/126	1.025	22	1.075		130/126	1.059	20	1.042	*	131/126	0.897	22	1.054	*	129/127	1.207	21	1.091	*	130/127	1.208	21	1.141	*	131/127	1.092	22	1.118	*	129/128	1.062	22	1.065	*	130/128	1.079
993	gi|60099015	hypothetical protein RCJMB04_19g16 [Gallus gallus]	565	64504	21	19	11	10	26.6	5.57	0.82	Quantitation summary for protein	129/126	1.123	21	1.07	*	130/126	1.069	21	[1.067]		131/126	1.12	20	1.033	*	129/127	1.058	21	1.154		130/127	0.985	21	1.181		131/127	1.103	21	1.197	*	129/128	1.24	21	1.076	*	130/128	1.165
994	gi|211965	immunoglobulin heavy chain [Gallus gallus]	563	13725	31	28	6	6	50	8.91	8.16	Quantitation summary for protein	129/126	1.023	2	1.067		130/126	0.997	2	1.085		131/126	1.442	2	1.216		129/127	0.657	2	1.1		130/127	0.626	2	1.082		131/127	0.964	2	1.035		129/128	0.759	2	1.088		130/128	0.729
995	gi|44969758	eukaryotic translation elongation factor 1 [Gallus gallus]	562	57199	27	19	10	8	19.7	6.12	0.65	Quantitation summary for protein	129/126	1.204	23	1.043	*	130/126	1.256	21	1.055	*	131/126	1.551	23	1.056	*	129/127	1.469	23	1.075	*	130/127	1.487	22	1.114	*	131/127	1.967	23	1.108	*	129/128	1.514	23	[1.063]		130/128	1.532
996	gi|60099213	hypothetical protein RCJMB04_34k20 [Gallus gallus]	562	32607	31	22	12	10	43	8.79	2.88	Quantitation summary for protein	129/126	0.856	14	[1.119]		130/126	0.943	13	1.066	*	131/126	1.091	14	1.089	*	129/127	1.067	14	1.205		130/127	1.153	13	1.296		131/127	1.415	14	1.36	*	129/128	0.904	14	[1.161]		130/128	0.985
997	gi|363733997	PREDICTED: spectrin beta chain, erythrocyte [Gallus gallus]	562	292949	25	22	11	11	5.1	5.66	0.14	Quantitation summary for protein	129/126	1.129	25	1.05	*	130/126	1.048	25	[1.088]		131/126	1.141	25	1.055	*	129/127	0.997	25	[1.128]		130/127	0.904	25	1.143	*	131/127	1.047	25	[1.133]		129/128	1.667	25	1.097	*	130/128	1.527
998	gi|363741740	PREDICTED: glutathione synthetase [Gallus gallus]	561	56663	30	28	12	12	34.2	5.67	0.97	Quantitation summary for protein	129/126	1.119	22	[1.037]		130/126	1.018	22	1.042		131/126	1.093	22	[1.055]		129/127	1.184	22	1.119	*	130/127	1.052	22	[1.131]		131/127	1.203	22	[1.153]		129/128	1.098	22	1.071	*	130/128	0.953
999	gi|363731267	PREDICTED: 39S ribosomal protein L2, mitochondrial [Gallus gallus]	560	36500	21	21	5	5	20.1	11.05	0.84	Quantitation summary for protein	129/126	1.178	20	1.042	*	130/126	1.078	20	1.046	*	131/126	1.157	21	1.049	*	129/127	0.813	21	1.163	*	130/127	0.727	21	1.194	*	131/127	0.834	21	1.204	*	129/128	1.05	21	[1.087]		130/128	0.947
1000	gi|3551531	avena [Gallus gallus]	560	66570	26	18	10	6	23.5	6.11	0.54	Quantitation summary for protein	129/126	0.969	11	1.06		130/126	0.924	11	1.08	*	131/126	0.972	11	1.021	*	129/127	1.435	11	[1.094]		130/127	1.416	10	1.068	*	131/127	1.498	11	1.106	*	129/128	1.329	11	1.133	*	130/128	1.25
1001	gi|46519238	complement C3 precursor [Gallus gallus]	560	11160	27	25	6	6	62.2	6.54	7.54	Quantitation summary for protein	129/126	0.847	4	1.058	*	130/126	1.002	4	1.016		131/126	0.554	4	1.055	*	129/127	1.294	4	1.216		130/127	1.496	4	1.153	*	131/127	0.879	4	1.118		129/128	0.822	4	1.099	*	130/128	0.958
1002	gi|118090533	PREDICTED: OCIA domain-containing protein 1 [Gallus gallus]	560	33460	31	25	7	6	42.7	6.93	1.83	Quantitation summary for protein	129/126	0.988	29	[1.071]		130/126	1.07	29	1.059	*	131/126	1.005	29	[1.064]		129/127	1.008	29	1.2		130/127	1.067	29	[1.194]		131/127	1.066	29	1.205		129/128	0.885	29	[1.184]		130/128	0.946
1003	gi|387587	Jun-binding protein, partial [Gallus gallus]	559	29698	24	20	9	8	44.3	10.14	2.57	Quantitation summary for protein	129/126	1.455	21	[1.121]		130/126	1.242	18	1.053	*	131/126	1.41	21	[1.110]		129/127	1.42	21	1.291	*	130/127	1.212	19	[1.398]		131/127	1.431	21	[1.548]		129/128	1.703	21	1.173	*	130/128	1.456
1004	gi|50760377	PREDICTED: ras-related protein Rap-1A isoform 2 [Gallus gallus]	559	25455	30	22	7	5	37.5	6.4	2.04	Quantitation summary for protein	129/126	0.966	12	1.048	*	130/126	1.085	12	1.052	*	131/126	1.061	12	1.035	*	129/127	1.794	12	1.223	*	130/127	1.971	12	1.223	*	131/127	2.05	12	1.231	*	129/128	1.381	12	1.158	*	130/128	1.531
1005	gi|53130298	hypothetical protein RCJMB04_6n13 [Gallus gallus]	559	40885	25	23	6	5	15.6	5.75	1.01	Quantitation summary for protein	129/126	1.544	4	1.204	*	130/126	1.056	3	1.146		131/126	1.051	4	1.196		129/127	1.013	4	1.146		130/127	0.659	3	1.096	*	131/127	0.717	4	1.111	*	129/128	1.029	4	1.097		130/128	0.675
1006	gi|363740927	PREDICTED: c-Jun-amino-terminal kinase-interacting protein 4 isoform 2 [Gallus gallus]	558	164591	24	18	11	8	10	5.1	0.17	Quantitation summary for protein	129/126	1.345	15	1.031	*	130/126	1.188	15	1.111	*	131/126	1.179	15	1.045	*	129/127	1.372	15	[1.115]		130/127	1.185	15	[1.159]		131/127	1.252	15	1.098	*	129/128	1.549	15	1.109	*	130/128	1.35
1007	gi|363742151	PREDICTED: LOW QUALITY PROTEIN: ankyrin-1 [Gallus gallus]	557	245833	20	17	6	6	3.8	6.05	0.08	Quantitation summary for protein	129/126	0.693	6	1.049	*	130/126	0.924	6	1.029	*	131/126	1.031	6	1.075		129/127	1.723	6	1.595	*	130/127	2.245	6	[1.697]		131/127	2.666	6	[1.755]		129/128	1.626	6	[1.309]		130/128	2.139
1008	gi|5870119	small nuclear ribonucleoprotein B~ [Gallus gallus]	555	27263	25	23	5	5	18.3	11.2	0.78	Quantitation summary for protein	129/126	1.053	23	1.052	*	130/126	0.86	23	[1.133]		131/126	0.846	23	[1.077]		129/127	0.815	23	1.072	*	130/127	0.651	23	1.218	*	131/127	0.681	23	[1.172]		129/128	0.706	23	1.084	*	130/128	0.568
1009	gi|50752008	PREDICTED: 39S ribosomal protein L44, mitochondrial [Gallus gallus]	554	39643	18	16	6	5	17.5	9.57	1.06	Quantitation summary for protein	129/126	0.886	17	1.097	*	130/126	1.107	17	[1.156]		131/126	1.23	17	1.072	*	129/127	0.909	17	1.142	*	130/127	1.11	17	1.196	*	131/127	1.313	17	[1.198]		129/128	1.101	17	1.106	*	130/128	1.368
1010	gi|363733756	PREDICTED: LIM and calponin homology domains-containing protein 1 [Gallus gallus]	554	142206	20	18	9	8	10.5	6.7	0.23	Quantitation summary for protein	129/126	0.887	18	1.068	*	130/126	0.903	18	[1.077]		131/126	1.014	18	[1.061]		129/127	0.919	17	1.162	*	130/127	0.926	17	1.167		131/127	1.142	18	1.235	*	129/128	1.152	18	1.107	*	130/128	1.165
1011	gi|38679397	popeye domain-containing protein 2B [Gallus gallus]	554	42567	30	25	9	9	25.2	5.44	1.46	Quantitation summary for protein	129/126	1.23	28	1.05	*	130/126	1.163	27	1.07	*	131/126	1.222	28	1.037	*	129/127	1.852	28	[1.270]		130/127	1.713	27	[1.265]		131/127	1.913	28	[1.285]		129/128	1.716	28	1.129	*	130/128	1.614
1012	gi|410610509	histidine-rich glycoprotein [Gallus gallus]	554	92741	18	15	3	3	4.6	6.85	0.15	Quantitation summary for protein	129/126	1.119	14	1.03	*	130/126	0.844	13	1.119	*	131/126	0.796	15	1.044	*	129/127	1.274	15	1.188	*	130/127	0.912	13	[1.198]		131/127	0.928	15	[1.152]		129/128	0.877	15	1.074	*	130/128	0.62
1013	gi|313760664	AMP deaminase 3 [Gallus gallus]	553	103080	25	21	12	10	17.6	6.24	0.5	Quantitation summary for protein	129/126	1.033	25	[1.072]		130/126	1.087	25	[1.075]		131/126	1.108	25	[1.050]		129/127	1.386	25	1.131	*	130/127	1.394	24	1.137	*	131/127	1.508	24	1.138	*	129/128	1.156	25	[1.095]		130/128	1.173
1014	gi|53133917	hypothetical protein RCJMB04_21p3 [Gallus gallus]	553	72765	33	23	16	11	30.7	6.24	0.85	Quantitation summary for protein	129/126	1.056	25	1.037	*	130/126	1.01	24	[1.043]		131/126	1.136	25	1.035	*	129/127	1.059	25	1.208		130/127	0.989	24	1.212		131/127	1.185	25	1.215	*	129/128	1.111	25	[1.089]		130/128	1.048
1015	gi|363736730	PREDICTED: nexilin isoform 1 [Gallus gallus]	552	97309	28	25	15	13	22.8	5.23	0.59	Quantitation summary for protein	129/126	0.913	26	1.046	*	130/126	1.001	25	[1.068]		131/126	1.246	26	1.036	*	129/127	1.371	26	[1.208]		130/127	1.471	25	[1.200]		131/127	1.947	26	[1.246]		129/128	1.451	26	1.13	*	130/128	1.57
1016	gi|50511717	carnitine palmitoyltransferase I [Gallus gallus]	551	100946	32	22	12	10	19.6	8.62	0.47	Quantitation summary for protein	129/126	1.372	23	[1.080]		130/126	1.278	23	1.06	*	131/126	1.24	23	1.044	*	129/127	1.82	23	1.15	*	130/127	1.657	23	1.2	*	131/127	1.712	23	1.191	*	129/128	1.759	23	1.095	*	130/128	1.616
1017	gi|12381875	ribosomal protein L22 [Gallus gallus]	551	19360	24	23	4	4	21.1	9.21	1.23	Quantitation summary for protein	129/126	1.09	23	[1.071]		130/126	0.988	21	1.045		131/126	1.115	23	1.04	*	129/127	0.9	22	[1.273]		130/127	0.793	21	[1.313]		131/127	0.958	22	[1.347]		129/128	0.93	22	1.172	*	130/128	0.826
1018	gi|50748536	PREDICTED: activator of 90 kDa heat shock protein ATPase homolog 1 isoform 2 [Gallus gallus]	551	45526	32	28	15	12	41.2	5.61	1.86	Quantitation summary for protein	129/126	0.933	30	[1.093]		130/126	1.065	30	[1.077]		131/126	1.154	30	1.063	*	129/127	0.866	30	[1.326]		130/127	0.966	30	[1.404]		131/127	1.114	30	[1.366]		129/128	0.895	30	[1.143]		130/128	1.008
1019	gi|363745239	PREDICTED: histone H1x, partial [Gallus gallus]	550	20157	25	21	7	5	41.7	9.86	1.94	Quantitation summary for protein	129/126	0.711	22	1.069	*	130/126	0.772	22	1.065	*	131/126	0.605	22	[1.055]		129/127	0.933	22	[1.085]		130/127	0.989	22	[1.096]		131/127	0.826	22	[1.096]		129/128	0.837	22	1.042	*	130/128	0.896
1020	gi|53127400	hypothetical protein RCJMB04_2c16 [Gallus gallus]	550	13857	26	26	6	6	52.5	6.56	6.23	Quantitation summary for protein	129/126	0.819	26	1.054	*	130/126	0.959	25	1.063	*	131/126	0.859	26	1.039	*	129/127	0.829	25	1.156	*	130/127	0.934	25	[1.215]		131/127	0.887	26	[1.226]		129/128	0.666	26	[1.104]		130/128	0.771
1021	gi|50733505	PREDICTED: tubulin polymerization-promoting protein isoform 2 [Gallus gallus]	549	32903	23	20	7	6	21.7	9.4	0.78	Quantitation summary for protein	129/126	0.714	20	[1.080]		130/126	0.775	20	[1.057]		131/126	0.649	19	1.047	*	129/127	0.962	20	[1.190]		130/127	1.021	20	[1.225]		131/127	0.919	20	[1.224]		129/128	0.663	20	[1.107]		130/128	0.71
1022	gi|53126991	hypothetical protein RCJMB04_1i11 [Gallus gallus]	549	32876	17	16	5	5	24	5.29	0.78	Quantitation summary for protein	129/126	0.916	17	1.078	*	130/126	1.066	17	1.049	*	131/126	1.1	17	1.036	*	129/127	1.102	17	[1.140]		130/127	1.253	17	[1.187]		131/127	1.376	17	[1.217]		129/128	1.27	17	1.091	*	130/128	1.458
1023	gi|63662	unnamed protein product [Gallus gallus]	547	64712	14	11	4	2	5.9	8.78	0.22	Quantitation summary for protein	129/126	0.859	14	1.022	*	130/126	0.917	12	1.024	*	131/126	0.829	14	1.026	*	129/127	1.17	14	[1.201]		130/127	1.263	14	[1.215]		131/127	1.175	14	[1.222]		129/128	1.249	14	[1.130]		130/128	1.36
1024	gi|50751616	PREDICTED: enoyl-CoA hydratase domain-containing protein 2, mitochondrial [Gallus gallus]	546	34677	36	20	15	11	52.1	9.21	3.32	Quantitation summary for protein	129/126	0.81	27	1.125	*	130/126	0.93	25	1.116	*	131/126	0.752	27	[1.108]		129/127	0.904	27	1.312		130/127	1.017	25	1.335		131/127	0.874	27	1.351	*	129/128	0.762	27	1.178	*	130/128	0.864
1025	gi|152031574	RecName: Full=Collagen alpha-1(I) chain; AltName: Full=Alpha-1 type I collagen; Flags: Precursor	546	151988	18	16	8	7	6.1	5.47	0.16	Quantitation summary for protein	129/126	0.656	17	[1.137]		130/126	0.614	17	1.164	*	131/126	0.69	17	[1.080]		129/127	0.924	17	1.127	*	130/127	0.845	17	[1.157]		131/127	1.01	17	1.142		129/128	1.308	16	1.074	*	130/128	1.196
1026	gi|1915892	tom-1A protein [Gallus gallus]	543	18826	12	12	4	4	41.5	5.46	0.93	Quantitation summary for protein	129/126	1.05	2	1.017		130/126	1.119	2	1.001	*	131/126	1.075	2	1.029		129/127	0.977	2	1.336		130/127	1.018	2	1.315		131/127	1.041	2	1.277		129/128	1.031	2	1.026		130/128	1.085
1027	gi|62983	ribosomal protein L5 [Gallus gallus]	543	42777	39	22	16	10	40.4	9.73	1.84	Quantitation summary for protein	129/126	1.14	28	1.045	*	130/126	0.951	28	1.072	*	131/126	1.234	29	[1.063]		129/127	1.713	29	[1.281]		130/127	1.404	29	1.248	*	131/127	1.94	29	[1.287]		129/128	1.519	29	1.134	*	130/128	1.257
1028	gi|293632003	mitochondrial complex I subunit NDUFV3 transcript variant 1 [Gallus gallus]	542	11990	15	13	2	1	24.5	9.91	2.52	Quantitation summary for protein	129/126	0.571	15	1.107	*	130/126	0.666	14	1.089	*	131/126	0.491	15	1.135	*	129/127	1.434	15	1.313	*	130/127	1.654	14	1.291	*	131/127	1.283	15	1.272	*	129/128	0.532	15	1.114	*	130/128	0.611
1029	gi|212659	skeletal muscle C-protein, partial [Gallus gallus]	542	127988	24	22	5	4	4.5	6.05	0.16	Quantitation summary for protein	129/126	---	1	---		130/126	---	1	---		131/126	---	1	---		129/127	---	1	---		130/127	---	1	---		131/127	---	1	---		129/128	---	1	---		130/128	---
1030	gi|313661460	exportin-1 [Gallus gallus]	541	138655	19	18	6	5	7.7	5.74	0.12	Quantitation summary for protein	129/126	1.768	18	1.057	*	130/126	1.41	17	1.047	*	131/126	1.357	18	[1.070]		129/127	2.237	18	1.165	*	130/127	1.738	18	[1.152]		131/127	1.786	18	[1.177]		129/128	2.395	18	1.104	*	130/128	1.877
1031	gi|363745920	PREDICTED: apolipoprotein A-II-like [Gallus gallus]	539	12496	29	24	6	5	58.8	9.99	10.2	Quantitation summary for protein	129/126	0.851	25	1.072	*	130/126	1.561	25	1.06	*	131/126	0.695	25	[1.076]		129/127	0.371	25	1.184	*	130/127	0.666	25	1.269	*	131/127	0.316	25	[1.252]		129/128	0.415	25	1.088	*	130/128	0.751
1032	gi|113862	RecName: Full=Natriuretic peptides A; AltName: Full=Prepronatriodilatin; Contains: RecName: Full=Atrial natriuretic factor; Short=ANF; AltName: Full=Atrial natriuretic peptide; Short=ANP; Flags: Precursor	539	17479	32	25	6	4	48.6	5.28	3.13	Quantitation summary for protein	129/126	0.741	27	[1.076]		130/126	0.894	26	[1.094]		131/126	0.762	27	[1.116]		129/127	1.163	26	[1.207]		130/127	1.37	25	[1.214]		131/127	1.245	26	[1.226]		129/128	0.782	27	1.093	*	130/128	0.929
1033	gi|53130738	hypothetical protein RCJMB04_9m12 [Gallus gallus]	539	54158	16	14	7	6	21.1	7.16	0.6	Quantitation summary for protein	129/126	1.09	14	1.061	*	130/126	0.938	14	1.087	*	131/126	0.92	14	1.048	*	129/127	1.728	14	[1.194]		130/127	1.453	14	1.27	*	131/127	1.518	14	[1.233]		129/128	1.5	14	1.083	*	130/128	1.273
1034	gi|1684841	calgizzarin [Gallus gallus]	537	13353	18	14	4	3	37.6	6.08	2.94	Quantitation summary for protein	129/126	0.932	15	1.072	*	130/126	1.019	16	[1.142]		131/126	1.015	16	1.053		129/127	0.6	16	[1.218]		130/127	0.664	16	[1.215]		131/127	0.704	16	[1.204]		129/128	0.686	16	1.108	*	130/128	0.801
1035	gi|363742557	PREDICTED: uncharacterized protein LOC100859721 [Gallus gallus]	537	17487	49	31	10	8	40.3	9.1	5.94	Quantitation summary for protein	129/126	0.938	38	[1.074]		130/126	0.969	38	1.051	*	131/126	0.487	38	1.091	*	129/127	0.606	38	[1.272]		130/127	0.612	38	[1.325]		131/127	0.327	38	[1.337]		129/128	0.765	38	1.097	*	130/128	0.78
1036	gi|559679	immunoglobulin heavy chain variable region [Gallus gallus]	535	13401	27	24	5	5	38.3	8.68	6.69	Quantitation summary for protein	129/126	0.529	3	1.216	*	130/126	0.7	3	1.028	*	131/126	0.47	3	1.294	*	129/127	0.641	3	1.207		130/127	0.83	3	1.025	*	131/127	0.593	3	1.285		129/128	0.588	3	1.246		130/128	0.768
1037	gi|50729026	PREDICTED: bcl-2-like protein 13 [Gallus gallus]	535	58366	47	34	10	9	17.7	4.61	1.04	Quantitation summary for protein	129/126	0.739	38	1.108	*	130/126	0.885	35	[1.071]		131/126	0.777	37	1.066	*	129/127	0.654	38	[1.331]		130/127	0.792	35	[1.418]		131/127	0.714	37	[1.398]		129/128	0.698	38	[1.194]		130/128	0.845
1038	gi|118099296	PREDICTED: endonuclease G, mitochondrial [Gallus gallus]	534	36945	26	24	8	8	32.6	9.36	1.8	Quantitation summary for protein	129/126	1.29	24	1.08	*	130/126	1.076	22	[1.207]		131/126	0.878	24	[1.053]		129/127	1.257	24	1.127	*	130/127	1.026	22	[1.272]		131/127	0.889	24	[1.102]		129/128	1.242	24	[1.078]		130/128	1.022
1039	gi|53131063	hypothetical protein RCJMB04_11c19 [Gallus gallus]	533	22942	20	18	7	7	31.9	4.4	2.4	Quantitation summary for protein	129/126	1.006	20	1.185		130/126	0.971	20	1.091		131/126	0.915	20	[1.116]		129/127	0.915	20	1.227		130/127	0.863	20	[1.398]		131/127	0.865	20	1.504		129/128	0.965	20	1.168		130/128	0.918
1040	gi|53136692	hypothetical protein RCJMB04_32i2 [Gallus gallus]	533	19413	29	21	8	7	43.7	10.07	3.94	Quantitation summary for protein	129/126	1.147	23	[1.063]		130/126	1.324	23	[1.092]		131/126	1.235	23	1.074	*	129/127	0.978	23	1.274		130/127	1.102	23	1.308		131/127	1.094	23	1.329		129/128	1.117	23	[1.168]		130/128	1.271
1041	gi|118087908	PREDICTED: serine/threonine-protein phosphatase 2A 56 kDa regulatory subunit alpha isoform [Gallus gallus]	533	65446	24	19	8	7	16.8	6.6	0.63	Quantitation summary for protein	129/126	1.216	19	1.046	*	130/126	0.985	21	1.089		131/126	0.922	20	1.04	*	129/127	1.462	21	1.163	*	130/127	1.159	21	1.167	*	131/127	1.157	21	1.145	*	129/128	1.164	20	1.052	*	130/128	0.926
1042	gi|53135540	hypothetical protein RCJMB04_25f12 [Gallus gallus]	533	39789	24	23	4	4	15.3	4.99	0.75	Quantitation summary for protein	129/126	0.907	23	[1.026]		130/126	0.982	23	[1.052]		131/126	0.966	23	[1.029]		129/127	1.512	23	1.126	*	130/127	1.6	23	1.111	*	131/127	1.675	23	1.124	*	129/128	1.202	23	[1.069]		130/128	1.293
1043	gi|50728374	PREDICTED: 40S ribosomal protein S16 [Gallus gallus]	533	20413	33	25	13	9	59.6	10.21	6.25	Quantitation summary for protein	129/126	1.097	27	1.064	*	130/126	1.268	25	[1.066]		131/126	1.302	27	1.05	*	129/127	0.527	27	[1.330]		130/127	0.591	25	1.334	*	131/127	0.65	27	1.384	*	129/128	0.898	27	1.145	*	130/128	1.023
1044	gi|363737348	PREDICTED: prothymosin alpha-like [Gallus gallus]	532	10158	25	20	5	5	21.8	3.54	9.35	Quantitation summary for protein	129/126	0.617	21	[1.171]		130/126	0.666	19	1.048	*	131/126	0.851	21	1.069	*	129/127	1.668	20	[1.202]		130/127	2.453	19	1.144	*	131/127	2.414	20	[1.417]		129/128	0.855	21	[1.172]		130/128	1.179
1045	gi|1333620	paraoxonase 2 [Gallus gallus]	532	44367	16	15	6	6	27.4	5.11	0.65	Quantitation summary for protein	129/126	1.274	15	1.122	*	130/126	1.111	13	1.062	*	131/126	0.988	15	[1.068]		129/127	1.566	15	1.226	*	130/127	1.343	14	1.198	*	131/127	1.263	15	1.213	*	129/128	1.272	15	1.096	*	130/128	1.089
1046	gi|53126205	hypothetical protein RCJMB04_1b5 [Gallus gallus]	532	19708	24	19	9	8	74.2	5.43	4.64	Quantitation summary for protein	129/126	0.686	20	1.103	*	130/126	0.85	17	1.083	*	131/126	0.862	20	1.07	*	129/127	1.058	20	1.245		130/127	1.292	17	1.328	*	131/127	1.383	20	1.311	*	129/128	0.838	20	1.128	*	130/128	1.027
1047	gi|363737571	PREDICTED: homer protein homolog 2 [Gallus gallus]	531	50705	22	19	8	8	21.4	5.4	1.13	Quantitation summary for protein	129/126	0.854	20	1.101	*	130/126	0.851	20	1.098	*	131/126	1.305	20	1.099	*	129/127	1.191	20	1.376	*	130/127	1.159	20	1.427		131/127	1.892	20	1.541	*	129/128	1.24	20	1.269	*	130/128	1.218
1048	gi|118091572	PREDICTED: rho GTPase-activating protein 1 [Gallus gallus]	531	57760	43	33	12	10	27.2	6.16	0.74	Quantitation summary for protein	129/126	0.934	35	[1.057]		130/126	1.121	35	[1.061]		131/126	1.296	35	1.046	*	129/127	1.034	35	[1.300]		130/127	1.212	35	[1.309]		131/127	1.491	35	[1.326]		129/128	1.023	35	[1.134]		130/128	1.21
1049	gi|303304963	26S proteasome non-ATPase regulatory subunit 14 [Gallus gallus]	529	39528	19	16	7	6	29	6	1.06	Quantitation summary for protein	129/126	1.067	18	1.058	*	130/126	1.03	18	1.068		131/126	1.244	17	1.034	*	129/127	1.982	18	1.189	*	130/127	1.87	18	1.234	*	131/127	2.4	18	1.204	*	129/128	1.509	18	1.116	*	130/128	1.437
1050	gi|1142718	Cu/Zn superoxide dismutase [Gallus gallus]	528	18500	47	35	9	8	38.3	6.1	11.27	Quantitation summary for protein	129/126	0.806	38	1.059	*	130/126	0.866	38	[1.068]		131/126	0.748	37	1.038	*	129/127	0.498	38	[1.186]		130/127	0.523	38	[1.183]		131/127	0.483	38	[1.201]		129/128	0.559	38	[1.076]		130/128	0.592
1051	gi|5420367	hypoxanthine guanine phosphoribosyl transferase [Gallus gallus]	528	29690	25	22	9	8	46.8	6.99	1.61	Quantitation summary for protein	129/126	1.111	23	1.063	*	130/126	1.099	23	1.104	*	131/126	1.029	23	1.046	*	129/127	1.167	23	[1.335]		130/127	1.128	23	[1.313]		131/127	1.124	23	1.334		129/128	1.015	23	1.121		130/128	0.99
1052	gi|118099124	PREDICTED: 14 kDa phosphohistidine phosphatase [Gallus gallus]	527	15769	12	12	3	3	36	5.71	1.18	Quantitation summary for protein	129/126	0.785	12	[1.072]		130/126	0.875	11	1.039	*	131/126	0.829	12	1.049	*	129/127	0.598	12	1.138	*	130/127	0.671	12	1.201	*	131/127	0.657	12	1.185	*	129/128	0.641	12	1.089	*	130/128	0.69
1053	gi|46090743	PD284 protein [Gallus gallus]	527	11716	12	12	3	3	38.5	9.67	1.16	Quantitation summary for protein	129/126	0.945	12	1.113		130/126	1.412	12	1.073	*	131/126	1.15	12	1.06	*	129/127	0.895	11	1.105	*	130/127	1.239	12	1.104	*	131/127	1.075	12	[1.115]		129/128	1.126	12	[1.149]		130/128	1.659
1054	gi|468204	actin capping protein beta subunit, isoform 2 [Gallus gallus]	525	36319	39	26	11	8	33.8	5.69	1.85	Quantitation summary for protein	129/126	0.862	5	1.04	*	130/126	0.965	5	1.077		131/126	0.938	5	1.035	*	129/127	1.047	5	1.04		130/127	1.145	5	1.096	*	131/127	1.185	5	[1.058]		129/128	0.897	4	1.038	*	130/128	1.025
1055	gi|60098551	hypothetical protein RCJMB04_3l6 [Gallus gallus]	524	75577	24	21	8	8	14.5	5.93	0.47	Quantitation summary for protein	129/126	1.379	21	[1.063]		130/126	1.19	21	1.03	*	131/126	1.335	21	1.046	*	129/127	2.929	20	1.179	*	130/127	2.085	21	[1.233]		131/127	2.488	21	[1.273]		129/128	2.027	21	[1.139]		130/128	1.726
1056	gi|32967298	calcineurin A alpha, partial [Gallus gallus]	524	64437	24	22	6	5	12.5	5.9	0.28	Quantitation summary for protein	129/126	1.059	22	1.017	*	130/126	1.038	23	[1.025]		131/126	0.964	23	1.022	*	129/127	1.217	23	1.078	*	130/127	1.169	23	1.091	*	131/127	1.155	23	[1.096]		129/128	1.014	23	[1.032]		130/128	0.982
1057	gi|363728430	PREDICTED: glycogen synthase kinase-3 beta [Gallus gallus]	523	68970	20	15	7	5	18.7	9.53	0.39	Quantitation summary for protein	129/126	1.317	19	[1.074]		130/126	1.093	18	1.08	*	131/126	1.194	19	[1.064]		129/127	1.206	19	[1.205]		130/127	0.977	18	[1.185]		131/127	1.137	19	[1.216]		129/128	1.375	19	1.123	*	130/128	1.133
1058	gi|53127063	hypothetical protein RCJMB04_1i19 [Gallus gallus]	523	58916	30	22	8	8	26.9	8.77	0.72	Quantitation summary for protein	129/126	0.826	25	1.076	*	130/126	0.737	25	1.065	*	131/126	0.881	25	1.043	*	129/127	0.918	25	1.219	*	130/127	0.801	25	1.219	*	131/127	1.02	25	1.255		129/128	1.159	25	1.131	*	130/128	1.02
1059	gi|363744458	PREDICTED: UPF0553 protein C9orf64 isoform 1 [Gallus gallus]	522	44993	14	13	5	4	16.7	5.82	0.33	Quantitation summary for protein	129/126	1.315	13	[1.068]		130/126	1.249	12	1.065	*	131/126	1.178	13	1.038	*	129/127	1.359	13	[1.150]		130/127	1.295	13	1.113	*	131/127	1.266	13	1.109	*	129/128	1.213	13	[1.066]		130/128	1.166
1060	gi|118085706	PREDICTED: glycylpeptide N-tetradecanoyltransferase 2 [Gallus gallus]	522	67429	29	20	10	8	19.3	7.18	0.69	Quantitation summary for protein	129/126	1.044	10	1.035	*	130/126	1.008	11	1.061		131/126	1.107	11	1.074	*	129/127	2.048	11	1.168	*	130/127	1.967	11	1.148	*	131/127	2.455	10	1.092	*	129/128	1.592	11	[1.113]		130/128	1.543
1061	gi|363740277	PREDICTED: transmembrane protein 141 [Gallus gallus]	522	18479	19	17	5	5	33.8	6.84	2.24	Quantitation summary for protein	129/126	0.763	18	1.119	*	130/126	0.961	14	1.119		131/126	0.872	18	1.148	*	129/127	0.75	18	[1.373]		130/127	0.993	14	1.584		131/127	0.891	18	1.614		129/128	0.813	18	1.151	*	130/128	1.034
1062	gi|53136648	hypothetical protein RCJMB04_32b9 [Gallus gallus]	521	56303	23	19	9	8	24.5	5.44	0.87	Quantitation summary for protein	129/126	0.894	20	1.077	*	130/126	0.975	20	1.043	*	131/126	1.325	20	1.031	*	129/127	1.15	19	1.115	*	130/127	1.156	20	1.162	*	131/127	1.671	20	1.176	*	129/128	1.259	20	[1.117]		130/128	1.355
1063	gi|121944	RecName: Full=Histone H1	520	36535	27	23	7	6	26.6	11.12	1	Quantitation summary for protein	129/126	1.233	25	[1.103]		130/126	0.927	25	1.063	*	131/126	0.475	25	1.102	*	129/127	0.897	25	[1.348]		130/127	0.659	25	[1.451]		131/127	0.359	25	[1.374]		129/128	0.937	25	[1.221]		130/128	0.695
1064	gi|363738248	PREDICTED: adenine phosphoribosyltransferase-like [Gallus gallus]	519	22143	19	16	8	6	52.5	5.78	2.57	Quantitation summary for protein	129/126	0.731	17	1.055	*	130/126	0.851	16	1.058	*	131/126	0.825	17	1.067	*	129/127	0.728	15	1.127	*	130/127	0.833	15	1.118	*	131/127	0.871	16	[1.153]		129/128	0.673	17	1.061	*	130/128	0.773
1065	gi|53129691	hypothetical protein RCJMB04_5p23 [Gallus gallus]	519	59807	28	19	11	8	18.3	8.51	0.9	Quantitation summary for protein	129/126	1.077	25	1.071	*	130/126	1.13	25	1.102	*	131/126	0.908	25	1.072	*	129/127	1.113	24	1.428		130/127	1.138	24	1.526		131/127	0.976	24	1.47		129/128	0.925	25	[1.183]		130/128	0.958
1066	gi|50752403	PREDICTED: mitochondrial import inner membrane translocase subunit TIM14 isoform 3 [Gallus gallus]	517	15346	23	19	6	4	44.3	10.05	2.33	Quantitation summary for protein	129/126	0.874	21	1.057	*	130/126	1.06	20	1.033	*	131/126	1.036	21	[1.033]		129/127	0.788	21	1.089	*	130/127	0.938	21	[1.156]		131/127	0.972	21	[1.151]		129/128	0.898	21	1.045	*	130/128	1.079
1067	gi|302486333	suppressor of G2 allele of SKP1 homolog [Gallus gallus]	517	45094	25	23	8	8	32.1	5.48	0.89	Quantitation summary for protein	129/126	0.823	6	1.092	*	130/126	0.976	6	1.096		131/126	0.834	6	1.064	*	129/127	0.627	6	1.237	*	130/127	0.727	6	1.105	*	131/127	0.661	6	1.212	*	129/128	0.718	6	1.205	*	130/128	0.839
1068	gi|50748450	PREDICTED: protein transport protein Sec23A [Gallus gallus]	515	93918	29	22	10	9	13.6	6.51	0.51	Quantitation summary for protein	129/126	1.231	15	1.057	*	130/126	1.078	14	1.157		131/126	1.231	15	1.072	*	129/127	1.701	14	1.181	*	130/127	1.455	14	1.298	*	131/127	1.773	14	1.216	*	129/128	1.501	14	1.097	*	130/128	1.296
1069	gi|53130538	hypothetical protein RCJMB04_8j15 [Gallus gallus]	515	92024	15	12	7	5	12.7	9.22	0.28	Quantitation summary for protein	129/126	1.332	14	[1.167]		130/126	1.086	13	1.075	*	131/126	1.101	14	[1.127]		129/127	1.402	14	1.271	*	130/127	1.126	13	1.383		131/127	1.206	14	[1.447]		129/128	1.446	14	1.205	*	130/128	1.166
1070	gi|53136370	hypothetical protein RCJMB04_27o18 [Gallus gallus]	514	50546	34	27	10	7	31.8	9.05	1.14	Quantitation summary for protein	129/126	0.819	23	1.087	*	130/126	0.761	16	1.045	*	131/126	0.943	24	1.072	*	129/127	0.845	23	[1.313]		130/127	0.798	16	1.346	*	131/127	1.008	24	1.371		129/128	1.084	22	1.142	*	130/128	1.03
1071	gi|50746329	PREDICTED: glutamyl-tRNA(Gln) amidotransferase subunit B, mitochondrial [Gallus gallus]	514	68941	25	20	11	9	17.8	7.13	0.83	Quantitation summary for protein	129/126	1.159	21	[1.064]		130/126	1.176	20	1.05	*	131/126	1.137	20	1.025	*	129/127	1.165	21	1.207	*	130/127	1.153	21	1.243	*	131/127	1.188	21	1.249	*	129/128	1.226	21	[1.133]		130/128	1.225
1072	gi|212258	macrophage migration inhibitory factor [Gallus gallus]	513	14538	21	17	4	2	37.4	6.88	3.36	Quantitation summary for protein	129/126	1.027	18	1.143		130/126	0.881	17	1.093	*	131/126	0.872	18	1.063	*	129/127	0.735	17	[1.614]		130/127	0.616	16	1.775	*	131/127	0.649	17	1.842	*	129/128	1.041	18	1.274		130/128	0.881
1073	gi|363735257	PREDICTED: insulin-degrading enzyme [Gallus gallus]	512	146536	30	21	16	12	12.9	7.19	0.36	Quantitation summary for protein	129/126	1.175	26	1.053	*	130/126	1.179	24	1.034	*	131/126	1.265	26	1.046	*	129/127	1.355	26	1.135	*	130/127	1.325	25	1.176	*	131/127	1.519	26	1.192	*	129/128	1.412	26	1.071	*	130/128	1.393
1074	gi|50740506	PREDICTED: uncharacterized protein LOC421428 [Gallus gallus]	512	25237	40	31	9	8	45	6.1	4.71	Quantitation summary for protein	129/126	0.995	39	[1.054]		130/126	1.14	37	[1.071]		131/126	0.976	40	1.033	*	129/127	0.778	39	1.088	*	130/127	0.872	37	1.107	*	131/127	0.794	39	[1.120]		129/128	0.812	39	[1.059]		130/128	0.917
1075	gi|118089434	PREDICTED: WD repeat-containing protein 44 isoform 1 [Gallus gallus]	511	118721	18	16	7	6	10.4	5.39	0.18	Quantitation summary for protein	129/126	0.799	16	1.023	*	130/126	0.827	16	1.04	*	131/126	0.838	16	[1.030]		129/127	1.038	16	1.07	*	130/127	1.05	16	1.077	*	131/127	1.132	16	1.065	*	129/128	0.942	16	1.059	*	130/128	0.962
1076	gi|53136380	hypothetical protein RCJMB04_28a17 [Gallus gallus]	511	60188	12	12	7	7	20.8	6.02	0.61	Quantitation summary for protein	129/126	1.005	11	1.045		130/126	0.828	11	1.055	*	131/126	1.087	12	[1.049]		129/127	0.921	12	[1.170]		130/127	0.708	12	1.142	*	131/127	1.003	12	1.215		129/128	1.008	12	1.131		130/128	0.782
1077	gi|53136660	hypothetical protein RCJMB04_32c1 [Gallus gallus]	511	94098	20	15	6	6	13.2	9.5	0.23	Quantitation summary for protein	129/126	1.204	14	1.043	*	130/126	0.979	15	1.056		131/126	1.269	15	1.049	*	129/127	1.181	15	[1.230]		130/127	0.973	15	[1.256]		131/127	1.342	15	[1.265]		129/128	1.788	15	1.08	*	130/128	1.486
1078	gi|302488427	Sjogren syndrome antigen B (autoantigen La) isoform 1 [Gallus gallus]	511	61025	28	22	12	9	31.7	8.05	0.98	Quantitation summary for protein	129/126	0.969	24	[1.080]		130/126	0.938	24	[1.090]		131/126	1.134	24	[1.070]		129/127	0.868	24	1.15	*	130/127	0.821	24	1.285	*	131/127	1.057	24	[1.281]		129/128	0.897	24	1.116	*	130/128	0.857
1079	gi|53127678	hypothetical protein RCJMB04_2o24 [Gallus gallus]	510	68003	27	20	11	10	30.5	6.11	0.68	Quantitation summary for protein	129/126	1.244	21	[1.082]		130/126	1.181	21	1.096	*	131/126	1.334	21	1.078	*	129/127	1.019	21	[1.268]		130/127	0.945	21	[1.296]		131/127	1.135	21	[1.364]		129/128	1.438	21	[1.139]		130/128	1.347
1080	gi|459352614	TPA_inf: aldehyde oxidase 1 [Gallus gallus]	509	168453	31	27	15	12	11.8	6.27	0.39	Quantitation summary for protein	129/126	1.057	29	1.042	*	130/126	1.06	28	1.076	*	131/126	1.155	31	1.07	*	129/127	1.081	30	[1.237]		130/127	1.06	28	1.249		131/127	1.225	31	1.248	*	129/128	1.052	30	1.093	*	130/128	1.04
1081	gi|53133424	hypothetical protein RCJMB04_16g22 [Gallus gallus]	509	55363	21	17	10	9	24.6	8.98	1.12	Quantitation summary for protein	129/126	1.123	18	1.066	*	130/126	1.072	18	1.085	*	131/126	1.124	18	1.07	*	129/127	0.953	18	1.262		130/127	0.89	18	1.241	*	131/127	0.993	18	1.245		129/128	1.075	18	[1.186]		130/128	1.04
1082	gi|118092288	PREDICTED: dehydrogenase/reductase SDR family member 7 [Gallus gallus]	509	43596	23	21	7	7	24.4	9.24	0.93	Quantitation summary for protein	129/126	1.394	23	[1.094]		130/126	1.208	23	1.063	*	131/126	1.273	22	1.047	*	129/127	0.915	23	[1.192]		130/127	0.776	23	[1.248]		131/127	0.865	23	[1.253]		129/128	1.149	23	1.112	*	130/128	0.983
1083	gi|363731481	PREDICTED: uncharacterized protein LOC421337 [Gallus gallus]	509	259112	27	26	13	12	6.6	4.65	0.16	Quantitation summary for protein	129/126	1.044	26	1.043	*	130/126	0.977	26	1.039	*	131/126	1.152	25	1.03	*	129/127	1.198	26	1.124	*	130/127	1.096	26	[1.133]		131/127	1.391	26	[1.154]		129/128	1.336	26	[1.085]		130/128	1.233
1084	gi|118087924	PREDICTED: 28S ribosomal protein S10, mitochondrial [Gallus gallus]	507	27072	18	17	6	6	40.1	8.58	1.01	Quantitation summary for protein	129/126	0.76	17	1.051	*	130/126	1.015	17	[1.152]		131/126	0.893	17	[1.124]		129/127	0.817	17	1.105	*	130/127	1.065	17	1.146		131/127	1.003	16	1.086		129/128	0.773	17	1.082	*	130/128	1.017
1085	gi|363736710	PREDICTED: kynurenine--oxoglutarate transaminase 3 [Gallus gallus]	507	59470	22	19	7	6	19.9	8.16	0.62	Quantitation summary for protein	129/126	1.135	21	1.028	*	130/126	1.262	21	1.084	*	131/126	1.051	22	1.031	*	129/127	1.322	22	1.217	*	130/127	1.46	20	1.142	*	131/127	1.275	22	1.224	*	129/128	1.071	22	[1.097]		130/128	1.179
1086	gi|363740732	PREDICTED: uncharacterized protein LOC769894 [Gallus gallus]	506	27498	26	20	8	7	52.4	4.3	2.52	Quantitation summary for protein	129/126	0.851	22	1.151	*	130/126	0.817	18	1.079	*	131/126	1.019	22	[1.054]		129/127	1.44	18	1.124	*	130/127	1.379	18	1.23	*	131/127	1.831	19	1.266	*	129/128	1.278	20	1.136	*	130/128	1.552
1087	gi|60099097	hypothetical protein RCJMB04_24l18 [Gallus gallus]	506	96740	29	23	14	10	18.2	8.43	0.49	Quantitation summary for protein	129/126	1.308	24	1.079	*	130/126	1.199	24	[1.095]		131/126	1.126	24	[1.089]		129/127	1.514	24	1.127	*	130/127	1.356	24	1.146	*	131/127	1.356	24	1.157	*	129/128	1.426	24	[1.137]		130/128	1.289
1088	gi|363746153	PREDICTED: mitochondrial import inner membrane translocase subunit TIM50 [Gallus gallus]	504	44325	21	19	9	8	21.2	9.39	1.21	Quantitation summary for protein	129/126	1.44	20	1.051	*	130/126	1.272	20	[1.066]		131/126	1.206	20	[1.074]		129/127	1.029	20	[1.292]		130/127	0.888	20	[1.309]		131/127	0.896	20	[1.314]		129/128	0.99	20	[1.145]		130/128	0.862
1089	gi|53130318	hypothetical protein RCJMB04_6o19 [Gallus gallus]	504	58460	15	15	5	5	10.6	5.53	0.39	Quantitation summary for protein	129/126	1.344	15	[1.038]		130/126	1.179	15	1.029	*	131/126	1.174	15	[1.045]		129/127	1.242	15	[1.101]		130/127	1.066	15	[1.084]		131/127	1.129	15	[1.109]		129/128	1.626	15	1.096	*	130/128	1.408
1090	gi|53133806	hypothetical protein RCJMB04_20i16 [Gallus gallus]	504	76391	22	21	8	8	15.3	5.99	0.4	Quantitation summary for protein	129/126	1.237	21	1.047	*	130/126	1.143	21	[1.089]		131/126	1.31	21	1.038	*	129/127	1.407	21	1.157	*	130/127	1.272	21	1.137	*	131/127	1.55	21	1.169	*	129/128	1.398	21	1.077	*	130/128	1.274
1091	gi|53130710	hypothetical protein RCJMB04_9j22 [Gallus gallus]	502	44635	28	22	8	7	19.7	10.1	0.77	Quantitation summary for protein	129/126	0.777	26	[1.045]		130/126	0.862	26	1.045	*	131/126	0.963	26	1.038	*	129/127	1.198	26	[1.180]		130/127	1.298	26	[1.204]		131/127	1.545	26	[1.219]		129/128	1.037	26	[1.076]		130/128	1.135
1092	gi|53127516	hypothetical protein RCJMB04_2m2 [Gallus gallus]	501	61973	23	17	8	6	15.8	6.19	0.51	Quantitation summary for protein	129/126	0.879	19	1.074	*	130/126	1.092	19	[1.211]		131/126	1.158	19	1.067	*	129/127	1.185	19	1.128	*	130/127	1.386	18	1.149	*	131/127	1.624	19	1.163	*	129/128	1.184	19	1.075	*	130/128	1.452
1093	gi|313747484	sirtuin [Gallus gallus]	501	42964	19	18	7	7	22	8.56	1.1	Quantitation summary for protein	129/126	0.988	18	[1.044]		130/126	1.14	17	1.058	*	131/126	0.874	18	1.035	*	129/127	0.777	18	[1.098]		130/127	0.875	17	1.121	*	131/127	0.715	18	1.123	*	129/128	0.916	18	1.056	*	130/128	1.041
1094	gi|363747010	PREDICTED: delta(3,5)-Delta(2,4)-dienoyl-CoA isomerase, mitochondrial-like, partial [Gallus gallus]	501	16344	32	29	9	8	40.7	5.91	10.62	Quantitation summary for protein	129/126	0.922	30	1.035	*	130/126	0.957	32	1.066	*	131/126	0.879	32	1.029	*	129/127	0.672	32	[1.155]		130/127	0.7	32	[1.199]		131/127	0.684	32	[1.195]		129/128	0.914	32	[1.099]		130/128	0.96
1095	gi|1667484	calcyclin [Gallus gallus]	501	12790	24	20	5	3	29.3	4.91	3.16	Quantitation summary for protein	129/126	0.491	20	1.095	*	130/126	0.885	20	1.087	*	131/126	0.778	20	1.082	*	129/127	1.134	20	[1.136]		130/127	1.997	20	1.215	*	131/127	1.868	20	1.231	*	129/128	1.151	20	1.102	*	130/128	2.045
1096	gi|53130213	hypothetical protein RCJMB04_6j4 [Gallus gallus]	499	61650	21	20	7	6	14.5	8.4	0.6	Quantitation summary for protein	129/126	1.382	20	1.124	*	130/126	1.191	20	[1.117]		131/126	1.152	20	[1.101]		129/127	1.293	20	1.173	*	130/127	1.09	20	[1.310]		131/127	1.121	20	[1.306]		129/128	1.356	19	1.105	*	130/128	1.141
1097	gi|63448	unnamed protein product [Gallus gallus]	496	17383	26	18	6	4	35.7	10.9	3.13	Quantitation summary for protein	129/126	0.519	23	[1.089]		130/126	0.473	23	1.064	*	131/126	0.604	23	[1.053]		129/127	1.274	23	[1.145]		130/127	1.136	23	[1.202]		131/127	1.542	23	[1.216]		129/128	1.376	23	1.126	*	130/128	1.237
1098	gi|118093076	PREDICTED: BAG family molecular chaperone regulator 3 isoform 1 [Gallus gallus]	495	68818	28	18	13	9	28	5.85	1.01	Quantitation summary for protein	129/126	0.755	21	1.112	*	130/126	0.549	21	1.186	*	131/126	0.913	21	1.139	*	129/127	0.497	21	1.64	*	130/127	0.353	21	1.635	*	131/127	0.625	21	1.837	*	129/128	1	21	1.264		130/128	0.717
1099	gi|53136494	hypothetical protein RCJMB04_29n5 [Gallus gallus]	493	92157	15	14	6	5	9.2	5.68	0.23	Quantitation summary for protein	129/126	1.121	14	1.052	*	130/126	1.042	13	1.036	*	131/126	1.167	13	1.031	*	129/127	1.265	14	1.197	*	130/127	1.134	14	1.219	*	131/127	1.353	14	1.206	*	129/128	1.153	14	1.1	*	130/128	1.043
1100	gi|314122187	CDGSH iron sulfur domain-containing protein 1 [Gallus gallus]	493	15120	20	15	5	4	56.5	8.84	3.14	Quantitation summary for protein	129/126	1.016	16	1.052		130/126	1.124	17	[1.045]		131/126	1.157	17	1.056	*	129/127	2.157	17	1.284	*	130/127	2.387	17	1.272	*	131/127	2.613	17	1.304	*	129/128	1.713	17	1.165	*	130/128	1.913
1101	gi|53133098	hypothetical protein RCJMB04_14h20 [Gallus gallus]	492	28144	16	15	6	6	32.4	5.56	1.44	Quantitation summary for protein	129/126	0.953	14	1.052	*	130/126	1.103	14	1.044	*	131/126	0.984	15	1.037		129/127	0.725	14	1.12	*	130/127	0.82	14	1.095	*	131/127	0.783	15	1.108	*	129/128	0.894	14	1.075	*	130/128	1.021
1102	gi|22651974	guanine nucleotide-binding protein G11 alpha-subunit [Gallus gallus]	492	48275	21	18	8	7	19.5	5.53	0.7	Quantitation summary for protein	129/126	1.116	9	1.034	*	130/126	1.08	9	1.052	*	131/126	1.06	9	1.038	*	129/127	1.148	9	1.128	*	130/127	1.086	9	[1.116]		131/127	1.134	9	1.119	*	129/128	1.071	9	1.064	*	130/128	1.023
1103	gi|148356974	MHC class II beta chain 2 [Gallus gallus]	492	30902	16	14	5	3	23.6	6.45	0.51	Quantitation summary for protein	129/126	0.48	14	1.146	*	130/126	0.792	13	1.046	*	131/126	0.571	14	[1.118]		129/127	0.839	14	[1.161]		130/127	1.211	14	1.289	*	131/127	1.038	14	1.188		129/128	0.874	14	[1.052]		130/128	1.273
1104	gi|118085007	PREDICTED: gamma-sarcoglycan [Gallus gallus]	492	36518	18	15	10	8	38.5	7.66	1.84	Quantitation summary for protein	129/126	0.972	17	1.069		130/126	1.012	17	1.066		131/126	1.077	16	1.036	*	129/127	0.758	17	1.264	*	130/127	0.791	16	1.23	*	131/127	0.87	17	1.315		129/128	0.713	17	[1.090]		130/128	0.732
1105	gi|50797623	PREDICTED: protein FAM136A-like [Gallus gallus]	492	16330	21	19	8	8	59.4	6.2	4.46	Quantitation summary for protein	129/126	0.732	21	1.142	*	130/126	0.808	20	1.121	*	131/126	0.78	21	[1.124]		129/127	0.438	21	1.264	*	130/127	0.472	20	1.407	*	131/127	0.485	21	[1.399]		129/128	0.561	21	1.172	*	130/128	0.628
1106	gi|315573167	pyruvate dehydrogenase kinase, isozyme 4 [Gallus gallus]	491	52469	26	21	9	7	22.2	8.1	0.63	Quantitation summary for protein	129/126	1.433	16	[1.104]		130/126	1.684	16	1.039	*	131/126	1.037	16	1.043	*	129/127	1.187	16	1.12	*	130/127	1.363	16	[1.193]		131/127	0.894	16	1.191	*	129/128	0.929	16	1.111	*	130/128	1.077
1107	gi|118094872	PREDICTED: peroxisomal bifunctional enzyme [Gallus gallus]	489	90210	17	17	8	8	13.8	9.22	0.43	Quantitation summary for protein	129/126	1.332	17	1.061	*	130/126	1.293	17	1.069	*	131/126	1.076	17	1.036	*	129/127	1.191	17	1.09	*	130/127	1.13	17	1.13	*	131/127	1.001	17	1.096		129/128	1.238	17	1.078	*	130/128	1.185
1108	gi|161513255	immunoglobulin heavy chain variable region [Gallus gallus]	489	15525	17	16	5	5	42.2	9.39	2.27	Quantitation summary for protein	129/126	0.651	2	1.124		130/126	0.687	2	1.032	*	131/126	0.891	2	1.18		129/127	0.139	2	1.278		130/127	0.143	2	1.392		131/127	0.198	2	1.695		129/128	0.158	2	1.199	*	130/128	0.165
1109	gi|666873	Gi2 protein alpha-subunit [Gallus gallus]	488	47309	25	20	8	6	20	5.43	0.6	Quantitation summary for protein	129/126	1.202	10	1.092	*	130/126	1.135	10	[1.100]		131/126	1.142	10	[1.067]		129/127	1.259	10	[1.156]		130/127	0.909	9	1.093	*	131/127	1.244	10	1.15	*	129/128	1.305	10	1.092	*	130/128	1.239
1110	gi|380876896	RecName: Full=Ethylmalonyl-CoA decarboxylase; AltName: Full=Enoyl-CoA hydratase domain-containing protein 1; AltName: Full=Methylmalonyl-CoA decarboxylase; Short=MMCD	488	36161	20	18	10	9	33.2	9.23	1.86	Quantitation summary for protein	129/126	0.912	20	[1.070]		130/126	1.098	20	[1.134]		131/126	1.046	20	1.064	*	129/127	0.877	20	[1.120]		130/127	1.033	20	1.154		131/127	1.046	20	[1.171]		129/128	0.693	20	1.053	*	130/128	0.823
1111	gi|118101652	PREDICTED: proteasome subunit beta type-2 isoform 2 [Gallus gallus]	487	26016	25	19	7	6	30.8	6.07	1.33	Quantitation summary for protein	129/126	0.776	20	1.11	*	130/126	1.24	20	[1.133]		131/126	1.47	20	[1.113]		129/127	0.999	20	1.16		130/127	1.561	20	[1.253]		131/127	1.97	20	[1.311]		129/128	1.009	20	1.101		130/128	1.59
1112	gi|118082239	PREDICTED: alpha-aminoadipic semialdehyde synthase, mitochondrial [Gallus gallus]	487	117837	29	25	11	10	11.2	6.54	0.39	Quantitation summary for protein	129/126	1.716	29	1.063	*	130/126	1.586	29	[1.076]		131/126	1.258	29	[1.061]		129/127	1.783	29	[1.211]		130/127	1.61	29	[1.235]		131/127	1.359	29	[1.217]		129/128	1.815	29	[1.106]		130/128	1.654
1113	gi|356582407	ribosomal protein L32 [Gallus gallus]	486	20546	28	24	5	5	34.1	11.35	2.36	Quantitation summary for protein	129/126	1.002	24	[1.084]		130/126	1.131	24	1.146	*	131/126	1.174	24	1.085	*	129/127	1.613	23	1.648	*	130/127	1.784	23	1.635	*	131/127	1.964	23	[1.696]		129/128	1.578	24	1.302	*	130/128	1.756
1114	gi|363744954	PREDICTED: glyoxylate reductase/hydroxypyruvate reductase [Gallus gallus]	486	38802	17	15	8	6	22.1	8.14	1.26	Quantitation summary for protein	129/126	1.121	16	1.092	*	130/126	1.189	16	1.061	*	131/126	1.176	16	1.058	*	129/127	0.907	16	1.169	*	130/127	0.94	16	1.236		131/127	0.99	16	1.295		129/128	1.108	16	1.104	*	130/128	1.159
1115	gi|363736947	PREDICTED: 6-phosphofructokinase, liver type isoform 1 [Gallus gallus]	486	93342	24	22	9	9	13.9	7.21	0.46	Quantitation summary for protein	129/126	1.101	13	1.058	*	130/126	0.967	12	[1.090]		131/126	1.018	13	1.06		129/127	1.008	13	1.169		130/127	0.875	12	1.182	*	131/127	0.969	13	1.193		129/128	1.177	13	[1.074]		130/128	1.008
1116	gi|53133502	hypothetical protein RCJMB04_17f8 [Gallus gallus]	486	32331	21	18	9	8	46.1	5.19	1.93	Quantitation summary for protein	129/126	0.854	21	1.078	*	130/126	0.972	21	1.087		131/126	1.008	20	1.045		129/127	1.26	20	1.182	*	130/127	1.403	20	1.237	*	131/127	1.498	21	1.311	*	129/128	1.119	20	1.083	*	130/128	1.247
1117	gi|363738721	PREDICTED: calcium/calmodulin-dependent protein kinase type 1-like [Gallus gallus]	486	47262	19	16	5	5	15.7	5.56	0.4	Quantitation summary for protein	129/126	1.21	17	[1.036]		130/126	1.21	17	1.041	*	131/126	1.277	17	1.03	*	129/127	2.621	16	1.16	*	130/127	2.522	16	1.154	*	131/127	2.832	16	1.166	*	129/128	2.281	17	[1.095]		130/128	2.251
1118	gi|457779	retinol-binding protein [Gallus gallus]	486	26051	42	33	8	6	36.2	5.93	1.62	Quantitation summary for protein	129/126	0.725	40	1.051	*	130/126	0.842	39	1.033	*	131/126	0.583	40	1.069	*	129/127	0.456	40	1.089	*	130/127	0.518	39	[1.100]		131/127	0.382	40	1.109	*	129/128	0.596	40	1.068	*	130/128	0.683
1119	gi|50750662	PREDICTED: ras-related protein Ral-B isoform 2 [Gallus gallus]	486	28948	22	20	6	5	30.6	6.24	0.92	Quantitation summary for protein	129/126	1.03	11	1.02	*	130/126	1.041	11	1.06	*	131/126	1.023	11	1.039		129/127	0.675	11	[1.155]		130/127	0.666	11	1.149	*	131/127	0.697	11	[1.141]		129/128	0.815	11	1.046	*	130/128	0.812
1120	gi|363734526	PREDICTED: iron-sulfur cluster assembly 2 homolog, mitochondrial [Gallus gallus]	486	20102	15	15	5	5	40.6	7.52	2.45	Quantitation summary for protein	129/126	1.147	14	1.069	*	130/126	1.036	14	1.068		131/126	1.057	15	1.068	*	129/127	0.717	14	1.106	*	130/127	0.633	14	1.177	*	131/127	0.693	15	1.14	*	129/128	0.978	14	1.047		130/128	0.871
1121	gi|187609622	RecName: Full=Eukaryotic translation initiation factor 2 subunit 1; AltName: Full=Eukaryotic translation initiation factor 2 subunit alpha; Short=eIF-2-alpha; Short=eIF-2A; Short=eIF-2alpha	486	41482	22	20	11	10	36.2	5.07	1.32	Quantitation summary for protein	129/126	0.993	20	1.07		130/126	0.948	20	1.063	*	131/126	1.048	20	1.048	*	129/127	1.037	20	1.111		130/127	0.968	20	1.175		131/127	1.138	20	1.176	*	129/128	1.161	20	1.057	*	130/128	1.093
1122	gi|288871991	LIM and SH3 protein 1 [Gallus gallus]	485	34848	20	19	5	5	20.5	7.04	0.58	Quantitation summary for protein	129/126	0.774	20	1.04	*	130/126	0.759	20	1.053	*	131/126	1.007	20	1.017		129/127	1.008	20	[1.099]		130/127	0.965	20	[1.098]		131/127	1.363	20	1.087	*	129/128	0.882	20	1.057	*	130/128	0.852
1123	gi|363743644	PREDICTED: platelet glycoprotein Ib alpha chain-like [Gallus gallus]	484	42938	15	13	7	6	15.3	4.81	0.68	Quantitation summary for protein	129/126	0.658	13	1.223	*	130/126	1.14	12	1.081	*	131/126	0.885	13	1.09	*	129/127	0.245	13	[1.443]		130/127	0.369	13	1.735	*	131/127	0.343	13	1.712	*	129/128	0.224	13	[1.374]		130/128	0.339
1124	gi|118098725	PREDICTED: gamma-glutamyltransferase 5 [Gallus gallus]	482	70264	32	23	10	9	18.3	8.88	0.65	Quantitation summary for protein	129/126	0.981	29	[1.041]		130/126	1.05	29	1.04	*	131/126	0.998	29	1.025		129/127	1.229	29	1.085	*	130/127	1.285	29	1.108	*	131/127	1.301	29	1.114	*	129/128	1.058	28	1.043	*	130/128	1.115
1125	gi|313661436	D-tyrosyl-tRNA(Tyr) deacylase 1 [Gallus gallus]	482	27762	16	15	4	4	15.9	6.92	0.57	Quantitation summary for protein	129/126	0.644	13	1.136	*	130/126	0.843	13	1.084	*	131/126	0.824	13	1.069	*	129/127	0.383	13	1.357	*	130/127	0.49	13	[1.469]		131/127	0.51	13	[1.453]		129/128	0.522	13	1.162	*	130/128	0.673
1126	gi|118102009	PREDICTED: 40S ribosomal protein S25 [Gallus gallus]	482	20177	26	20	8	6	45.6	10.12	4.44	Quantitation summary for protein	129/126	1.099	21	[1.075]		130/126	1.23	20	1.088	*	131/126	1.134	21	[1.074]		129/127	0.786	21	[1.433]		130/127	0.855	21	[1.356]		131/127	0.844	21	[1.437]		129/128	0.996	21	[1.214]		130/128	1.093
1127	gi|118093746	PREDICTED: actin-related protein 2/3 complex subunit 2 [Gallus gallus]	481	41139	24	16	10	4	26.3	6.84	1	Quantitation summary for protein	129/126	0.707	22	[1.104]		130/126	0.916	22	1.085	*	131/126	1.153	22	1.057	*	129/127	1.507	22	1.126	*	130/127	1.908	22	1.145	*	131/127	2.556	22	1.203	*	129/128	1.112	21	1.04	*	130/128	1.431
1128	gi|633038	133kDa myosin-binding subunit of smooth muscle myosin phosphatase (M133) [Gallus gallus]	481	131876	19	16	7	7	9.3	5.45	0.25	Quantitation summary for protein	129/126	0.891	17	1.072	*	130/126	0.944	17	1.066	*	131/126	0.971	17	[1.093]		129/127	0.565	17	1.079	*	130/127	0.586	17	1.076	*	131/127	0.641	17	[1.115]		129/128	0.793	17	1.04	*	130/128	0.844
1129	gi|26984174	serine-threonine protein phosphatase 2A regulatory subunit [Gallus gallus]	480	57055	21	18	9	8	23.7	5.87	0.75	Quantitation summary for protein	129/126	1.029	14	1.06		130/126	1.006	14	1.031		131/126	1.074	14	1.043	*	129/127	1.383	14	1.273	*	130/127	1.321	14	1.269	*	131/127	1.501	14	1.296	*	129/128	1.348	14	1.143	*	130/128	1.299
1130	gi|16323037	DEAD box protein DDX1 [Gallus gallus]	480	97208	19	18	8	8	12.3	6.64	0.44	Quantitation summary for protein	129/126	0.743	19	[1.172]		130/126	0.869	19	1.081	*	131/126	0.956	19	[1.123]		129/127	1.282	19	1.237	*	130/127	1.465	19	1.165	*	131/127	1.716	19	1.222	*	129/128	0.994	19	[1.236]		130/128	1.147
1131	gi|161513275	immunoglobulin heavy chain variable region [Gallus gallus]	480	14078	18	16	3	3	33.1	5.71	2.67	Quantitation summary for protein	129/126	---	0	---		130/126	---	0	---		131/126	---	0	---		129/127	---	0	---		130/127	---	0	---		131/127	---	0	---		129/128	---	0	---		130/128	---
1132	gi|53127756	hypothetical protein RCJMB04_3e17 [Gallus gallus]	479	52571	25	18	10	9	21.8	6.3	1.07	Quantitation summary for protein	129/126	0.896	16	1.058	*	130/126	0.916	16	1.075	*	131/126	1.079	16	1.033	*	129/127	1.388	16	[1.226]		130/127	1.387	16	1.24	*	131/127	2.038	15	1.216	*	129/128	1.209	16	1.105	*	130/128	1.219
1133	gi|118092708	PREDICTED: protein transport protein Sec31B isoform 1 [Gallus gallus]	479	145893	18	14	9	7	8.6	6.24	0.19	Quantitation summary for protein	129/126	1.599	14	1.168	*	130/126	1.318	14	1.14	*	131/126	1.208	14	1.115	*	129/127	1.509	14	1.208	*	130/127	1.216	14	1.199	*	131/127	1.186	14	1.176	*	129/128	1.921	14	1.173	*	130/128	1.561
1134	gi|62936	triacylglycerol lipase [Gallus gallus]	479	64692	18	18	8	8	21.4	8.55	0.49	Quantitation summary for protein	129/126	0.996	18	1.033		130/126	1.069	17	1.079	*	131/126	1.028	18	1.042	*	129/127	0.555	18	[1.473]		130/127	0.579	18	[1.466]		131/127	0.596	18	[1.496]		129/128	0.73	18	1.113	*	130/128	0.764
1135	gi|363734610	PREDICTED: alpha-parvin [Gallus gallus]	478	39368	13	12	6	5	22.6	4.92	0.62	Quantitation summary for protein	129/126	0.858	12	[1.191]		130/126	0.855	12	1.094	*	131/126	0.903	12	[1.060]		129/127	1.283	12	1.387	*	130/127	1.25	12	1.428		131/127	1.404	12	1.49	*	129/128	0.934	12	1.213		130/128	0.918
1136	gi|363746070	PREDICTED: protein ETHE1, mitochondrial, partial [Gallus gallus]	478	16536	15	13	6	5	40.7	10.21	4.35	Quantitation summary for protein	129/126	1.324	14	1.116	*	130/126	1.307	12	1.099	*	131/126	1.132	13	1.145	*	129/127	0.673	14	1.285	*	130/127	0.654	12	1.36	*	131/127	0.609	14	[1.283]		129/128	1.048	14	1.098		130/128	1.026
1137	gi|21320894	D-erythrulose reductase [Gallus gallus]	478	28441	17	15	7	6	32.5	6.84	1.43	Quantitation summary for protein	129/126	1.015	17	1.045		130/126	1.024	17	1.083		131/126	0.919	17	1.033	*	129/127	0.847	16	1.046	*	130/127	0.881	17	1.093	*	131/127	0.841	17	1.056	*	129/128	0.829	17	1.048	*	130/128	0.825
1138	gi|10636369	coagulation factor XIIIA [Gallus gallus]	477	95323	24	21	11	10	17.7	6.22	0.55	Quantitation summary for protein	129/126	1.269	23	[1.053]		130/126	1.267	23	1.046	*	131/126	1.368	23	1.035	*	129/127	1.626	23	[1.186]		130/127	1.587	23	[1.201]		131/127	1.823	23	[1.204]		129/128	1.644	23	[1.076]		130/128	1.619
1139	gi|5114446	DEAD-box RNA helicase [Gallus gallus]	476	74942	26	24	12	10	20	8.93	0.75	Quantitation summary for protein	129/126	1.049	9	1.022	*	130/126	1.188	10	1.1	*	131/126	1.252	10	1.044	*	129/127	0.74	10	1.182	*	130/127	0.797	10	1.183	*	131/127	0.894	10	1.191		129/128	1.36	10	1.07	*	130/128	1.479
1140	gi|460417315	39S ribosomal protein L46, mitochondrial [Gallus gallus]	476	38719	29	22	11	9	47.9	8.94	2.15	Quantitation summary for protein	129/126	1.022	27	1.051	*	130/126	1.044	27	[1.065]		131/126	1.117	27	1.049	*	129/127	0.73	27	1.169	*	130/127	0.729	27	1.169	*	131/127	0.83	27	1.196	*	129/128	0.997	27	[1.098]		130/128	1.004
1141	gi|60099167	hypothetical protein RCJMB04_30n4 [Gallus gallus]	475	41652	21	20	9	8	29.1	5.69	0.84	Quantitation summary for protein	129/126	1.044	20	1.081	*	130/126	1.016	20	1.033	*	131/126	1.19	20	1.04	*	129/127	1.311	20	1.229	*	130/127	1.247	20	[1.280]		131/127	1.554	20	[1.291]		129/128	1.124	20	[1.136]		130/128	1.078
1142	gi|118094253	PREDICTED: nucleoprotein TPR [Gallus gallus]	474	307233	26	17	15	10	7.3	4.95	0.12	Quantitation summary for protein	129/126	1.024	21	[1.056]		130/126	0.949	19	1.039	*	131/126	0.999	21	1.036		129/127	1.304	21	[1.195]		130/127	1.213	19	[1.135]		131/127	1.323	21	1.179	*	129/128	1.364	21	[1.102]		130/128	1.253
1143	gi|53136249	hypothetical protein RCJMB04_27g6 [Gallus gallus]	473	68120	13	12	3	3	6.5	5.39	0.21	Quantitation summary for protein	129/126	1.383	13	1.036	*	130/126	1.123	13	1.067	*	131/126	1.26	13	1.047	*	129/127	1.498	13	[1.164]		130/127	1.189	13	[1.204]		131/127	1.419	13	[1.186]		129/128	1.607	13	1.077	*	130/128	1.288
1144	gi|213021176	selenocysteine lyase [Gallus gallus]	473	49133	19	17	8	7	28.8	6.68	0.58	Quantitation summary for protein	129/126	0.941	17	1.047	*	130/126	0.919	17	[1.069]		131/126	0.979	17	1.034	*	129/127	0.835	17	1.144	*	130/127	0.797	17	1.156	*	131/127	0.903	17	1.161	*	129/128	1.05	17	[1.076]		130/128	1.012
1145	gi|118082523	PREDICTED: small nuclear ribonucleoprotein F [Gallus gallus]	471	11151	13	13	1	1	15.1	4.7	1.95	Quantitation summary for protein	129/126	0.794	12	1.098	*	130/126	0.683	12	1.137	*	131/126	0.964	12	1.069		129/127	0.617	13	1.153	*	130/127	0.52	12	[1.136]		131/127	0.779	13	1.12	*	129/128	0.856	13	1.214	*	130/128	0.728
1146	gi|363740590	PREDICTED: complement C5 [Gallus gallus]	471	200757	23	19	9	7	5.5	5.95	0.14	Quantitation summary for protein	129/126	0.941	22	1.03	*	130/126	1.081	22	1.045	*	131/126	0.828	22	[1.038]		129/127	1.319	22	[1.083]		130/127	1.482	22	1.064	*	131/127	1.207	22	1.089	*	129/128	0.887	22	[1.038]		130/128	1.005
1147	gi|363735364	PREDICTED: heat shock 70 kDa protein 12A [Gallus gallus]	470	93453	18	18	7	7	11.6	6.6	0.36	Quantitation summary for protein	129/126	0.972	17	1.063		130/126	0.94	18	[1.071]		131/126	0.988	18	1.039		129/127	1.242	18	1.198	*	130/127	1.181	18	1.224	*	131/127	1.322	18	1.194	*	129/128	1.079	18	[1.109]		130/128	1.045
1148	gi|53129131	hypothetical protein RCJMB04_5h5 [Gallus gallus]	470	75396	25	24	8	8	14.1	6.7	0.47	Quantitation summary for protein	129/126	1.208	25	1.026	*	130/126	1.115	25	1.04	*	131/126	1.034	25	1.019	*	129/127	1.073	25	[1.100]		130/127	0.968	25	1.091		131/127	0.955	25	[1.104]		129/128	1.061	25	1.046	*	130/128	0.965
1149	gi|14269537	liver fatty acid binding protein [Gallus gallus]	469	18193	13	12	5	4	40.9	7.74	0.97	Quantitation summary for protein	129/126	0.681	12	1.055	*	130/126	0.718	12	[1.038]		131/126	0.544	12	1.066	*	129/127	0.863	12	[1.116]		130/127	0.888	12	1.086	*	131/127	0.716	12	1.121	*	129/128	0.85	12	[1.074]		130/128	0.866
1150	gi|363728789	PREDICTED: 60S ribosomal protein L8 [Gallus gallus]	469	34650	29	22	11	8	41.2	10.96	2.28	Quantitation summary for protein	129/126	1.064	26	[1.133]		130/126	0.901	25	1.153	*	131/126	1.068	26	1.109	*	129/127	0.954	27	1.264		130/127	0.821	25	1.194	*	131/127	0.993	27	[1.436]		129/128	1.127	27	[1.190]		130/128	0.968
1151	gi|118092613	PREDICTED: GTP-binding protein SAR1a [Gallus gallus]	468	25470	15	14	2	2	11.6	6.21	0.85	Quantitation summary for protein	129/126	0.655	7	[1.048]		130/126	0.838	7	1.094	*	131/126	0.893	7	1.057	*	129/127	1.34	7	1.378		130/127	1.677	7	1.479	*	131/127	1.901	7	1.455	*	129/128	1.389	7	1.143	*	130/128	1.755
1152	gi|53133522	hypothetical protein RCJMB04_17i9 [Gallus gallus]	468	101336	24	16	9	6	14.7	5.68	0.25	Quantitation summary for protein	129/126	0.483	19	1.097	*	130/126	0.527	19	1.102	*	131/126	0.467	19	1.088	*	129/127	1.272	19	1.144	*	130/127	1.359	19	[1.139]		131/127	1.281	19	[1.163]		129/128	1.265	19	1.085	*	130/128	1.363
1153	gi|363739993	PREDICTED: mevalonate kinase [Gallus gallus]	468	38250	16	16	6	6	23.8	7.05	0.64	Quantitation summary for protein	129/126	1.139	16	[1.123]		130/126	1.242	16	[1.182]		131/126	1.088	16	1.056	*	129/127	1.199	16	1.208	*	130/127	1.249	15	1.106	*	131/127	1.191	16	1.232	*	129/128	1.211	16	1.169	*	130/128	1.303
1154	gi|363747241	PREDICTED: macrophage-capping protein-like [Gallus gallus]	467	41812	16	13	4	4	12.4	5.74	0.36	Quantitation summary for protein	129/126	1.242	15	[1.024]		130/126	0.992	15	1.058		131/126	0.964	15	1.027	*	129/127	0.913	15	[1.047]		130/127	0.712	15	1.092	*	131/127	0.736	15	[1.068]		129/128	1.28	15	1.047	*	130/128	1.009
1155	gi|161513263	immunoglobulin heavy chain variable region [Gallus gallus]	466	15363	17	15	4	3	43.4	6.08	1.23	Quantitation summary for protein	129/126	0.702	4	1.07	*	130/126	0.629	4	1.093	*	131/126	0.364	4	1.132	*	129/127	0.638	4	1.252	*	130/127	0.559	4	1.233	*	131/127	0.344	4	1.295	*	129/128	0.627	4	1.062	*	130/128	0.554
1156	gi|53127288	hypothetical protein RCJMB04_1k21 [Gallus gallus]	465	37934	19	13	7	4	24	9.32	0.95	Quantitation summary for protein	129/126	0.754	16	[1.161]		130/126	0.884	14	[1.130]		131/126	0.874	14	1.068	*	129/127	1.181	16	[1.403]		130/127	1.359	14	[1.497]		131/127	1.427	16	[1.513]		129/128	0.894	16	[1.258]		130/128	1.033
1157	gi|363742340	PREDICTED: chloride intracellular channel protein 4 [Gallus gallus]	465	32958	29	19	11	7	44.5	5.9	2.16	Quantitation summary for protein	129/126	1.008	25	[1.163]		130/126	1.005	22	1.077		131/126	1.02	25	1.08		129/127	1.179	25	1.426	*	130/127	1.264	23	1.466	*	131/127	1.241	25	[1.519]		129/128	1.408	25	1.194	*	130/128	1.471
1158	gi|14330324	aldo-keto reductase [Gallus gallus]	464	44353	20	17	7	6	25.9	7.63	0.65	Quantitation summary for protein	129/126	0.95	16	1.049	*	130/126	1.103	17	1.052	*	131/126	0.943	17	1.053	*	129/127	0.714	17	[1.100]		130/127	0.839	17	[1.146]		131/127	0.763	17	[1.123]		129/128	0.722	17	[1.080]		130/128	0.856
1159	gi|53130528	hypothetical protein RCJMB04_8i12 [Gallus gallus]	463	123362	18	17	8	7	8.7	7.13	0.27	Quantitation summary for protein	129/126	1.326	18	1.034	*	130/126	1.276	18	1.036	*	131/126	1.166	17	1.027	*	129/127	0.997	18	1.09		130/127	0.938	18	1.108	*	131/127	0.919	17	1.097	*	129/128	1.081	18	1.035	*	130/128	1.027
1160	gi|13940252	butyrylcholinesterase [Gallus gallus]	463	77658	18	16	8	6	14.3	7.1	0.39	Quantitation summary for protein	129/126	0.813	18	1.064	*	130/126	0.955	17	1.048	*	131/126	0.854	18	1.064	*	129/127	0.99	18	1.241		130/127	1.134	18	1.256	*	131/127	1.082	18	1.251		129/128	0.779	18	1.088	*	130/128	0.9
1161	gi|60098647	hypothetical protein RCJMB04_4h16 [Gallus gallus]	461	48769	28	25	8	7	23.6	4.72	0.8	Quantitation summary for protein	129/126	0.745	27	[1.034]		130/126	0.856	27	[1.068]		131/126	1.092	27	1.042	*	129/127	0.593	27	[1.150]		130/127	0.665	27	1.18	*	131/127	0.729	17	1.064	*	129/128	0.795	27	[1.094]		130/128	0.901
1162	gi|118089606	PREDICTED: cytochrome c oxidase subunit 7B, mitochondrial-like [Gallus gallus]	460	10060	21	18	2	1	26.6	10.58	1.42	Quantitation summary for protein	129/126	0.778	20	1.038	*	130/126	1.404	20	[1.163]		131/126	0.942	20	1.033	*	129/127	0.81	20	1.089	*	130/127	1.428	20	[1.087]		131/127	1.019	20	1.129		129/128	0.689	20	[1.069]		130/128	1.225
1163	gi|53136758	hypothetical protein RCJMB04_33h2 [Gallus gallus]	459	17739	16	15	6	5	45.3	9.9	2.38	Quantitation summary for protein	129/126	0.737	15	1.097	*	130/126	1.141	15	1.112	*	131/126	1.084	15	1.071	*	129/127	0.776	15	1.143	*	130/127	1.175	15	1.168	*	131/127	1.188	15	[1.180]		129/128	0.921	15	1.077	*	130/128	1.407
1164	gi|53130652	hypothetical protein RCJMB04_9c23 [Gallus gallus]	459	38921	29	21	11	7	36.4	10.09	1.08	Quantitation summary for protein	129/126	0.943	26	1.027	*	130/126	1.081	26	1.028	*	131/126	1.067	26	1.018	*	129/127	0.66	26	1.095	*	130/127	0.739	26	1.103	*	131/127	0.777	26	1.104	*	129/128	1.038	26	1.04	*	130/128	1.174
1165	gi|53133726	hypothetical protein RCJMB04_19l10 [Gallus gallus]	457	34911	18	18	4	4	15.3	6.97	0.57	Quantitation summary for protein	129/126	0.994	18	1.06		130/126	0.945	18	1.054	*	131/126	0.975	18	1.046	*	129/127	1.816	18	1.199	*	130/127	1.687	18	1.218	*	131/127	1.851	18	1.227	*	129/128	1.401	18	[1.102]		130/128	1.314
1166	gi|309319792	V-type proton ATPase subunit H [Gallus gallus]	456	63060	14	12	5	4	14	6.01	0.36	Quantitation summary for protein	129/126	1.364	12	1.077	*	130/126	1.202	12	1.082	*	131/126	1.266	12	1.05	*	129/127	1.149	12	[1.428]		130/127	0.99	12	[1.530]		131/127	1.109	12	[1.534]		129/128	1.293	12	[1.237]		130/128	1.124
1167	gi|363739557	PREDICTED: pentatricopeptide repeat-containing protein 1 [Gallus gallus]	455	117741	17	15	4	3	4.2	9.65	0.18	Quantitation summary for protein	129/126	1.138	16	1.086	*	130/126	1.397	15	1.186	*	131/126	1.204	16	1.093	*	129/127	1.023	13	1.135		130/127	1.365	13	1.168	*	131/127	2.489	14	1.396	*	129/128	1.184	16	1.228	*	130/128	1.434
1168	gi|53127644	hypothetical protein RCJMB04_2n4 [Gallus gallus]	455	48321	11	11	3	3	8.3	8.74	0.3	Quantitation summary for protein	129/126	1.061	11	1.043	*	130/126	1.223	11	1.091	*	131/126	1.178	11	1.029	*	129/127	0.519	11	[1.363]		130/127	0.585	11	[1.415]		131/127	0.6	11	1.35	*	129/128	0.914	11	1.152		130/128	1.039
1169	gi|300295	puromycin-sensitive aminopeptidase isozyme II, PSA-II {peptide SII-11} {EC 3.4.11.-} [chickens, brain, Peptide Partial, 19 aa]	455	2583	10	6	2	2	100	3.8	5.4	Quantitation summary for protein	129/126	0.729	9	1.021	*	130/126	1.023	10	[1.062]		131/126	0.955	10	1.028	*	129/127	2.491	9	[1.128]		130/127	3.625	9	1.147	*	131/127	3.775	8	1.079	*	129/128	1.671	9	1.063	*	130/128	2.402
1170	gi|50755023	PREDICTED: dynactin subunit 4 isoform 2 [Gallus gallus]	453	61387	19	16	8	6	29.6	6.86	0.6	Quantitation summary for protein	129/126	1.176	17	1.069	*	130/126	1.08	13	1.18		131/126	1.122	18	[1.073]		129/127	1.5	17	1.184	*	130/127	1.349	13	1.261	*	131/127	1.486	18	1.177	*	129/128	1.645	17	1.13	*	130/128	1.499
1171	gi|53127836	hypothetical protein RCJMB04_4e8 [Gallus gallus]	452	62919	30	24	6	6	11.8	8.59	0.58	Quantitation summary for protein	129/126	1.225	27	1.054	*	130/126	1.311	27	1.058	*	131/126	1.279	27	1.053	*	129/127	1.871	27	1.198	*	130/127	1.957	27	[1.250]		131/127	2.031	27	[1.245]		129/128	1.641	27	[1.130]		130/128	1.732
1172	gi|310772225	bridging integrator 1 [Gallus gallus]	452	57780	22	18	11	11	28.5	4.98	1.05	Quantitation summary for protein	129/126	0.851	22	1.047	*	130/126	0.942	22	1.049	*	131/126	0.915	22	1.033	*	129/127	0.908	21	1.116	*	130/127	1.101	22	[1.163]		131/127	1.138	22	[1.141]		129/128	0.964	21	1.058	*	130/128	1.136
1173	gi|363740811	PREDICTED: 26S proteasome non-ATPase regulatory subunit 12-like isoform 1 [Gallus gallus]	451	63056	28	18	15	10	28.3	6.28	0.84	Quantitation summary for protein	129/126	1.303	20	1.083	*	130/126	1.256	20	[1.087]		131/126	1.407	20	1.048	*	129/127	1.762	20	1.15	*	130/127	1.661	20	1.171	*	131/127	1.98	20	1.157	*	129/128	1.398	20	1.094	*	130/128	1.404
1174	gi|4959550	glutathione S-transferase class-alpha [Gallus gallus]	451	26597	39	31	11	10	48.9	8.03	6.43	Quantitation summary for protein	129/126	0.828	12	[1.179]		130/126	0.78	11	1.128	*	131/126	0.788	12	1.103	*	129/127	0.974	12	[1.789]		130/127	1.559	11	[1.860]		131/127	0.964	12	[1.992]		129/128	1.076	12	1.436		130/128	1.253
1175	gi|269784816	dolichyl-diphosphooligosaccharide--protein glycosyltransferase 48 kDa subunit [Gallus gallus]	451	53375	26	19	10	8	19.5	5.37	0.93	Quantitation summary for protein	129/126	1.188	23	1.036	*	130/126	1.133	22	[1.042]		131/126	1.19	23	1.024	*	129/127	1.542	23	[1.215]		130/127	1.441	22	[1.173]		131/127	1.607	23	[1.206]		129/128	1.274	23	[1.070]		130/128	1.199
1176	gi|363743190	PREDICTED: MAP kinase-activated protein kinase 2 [Gallus gallus]	451	46303	22	20	10	9	24.3	6.57	0.99	Quantitation summary for protein	129/126	1.135	21	[1.050]		130/126	1.026	21	[1.085]		131/126	1.158	21	[1.060]		129/127	1.387	21	1.082	*	130/127	1.225	21	1.079	*	131/127	1.472	21	1.078	*	129/128	1.114	21	1.078	*	130/128	0.993
1177	gi|53127660	hypothetical protein RCJMB04_2o2 [Gallus gallus]	450	102431	20	20	5	5	9.5	5.07	0.17	Quantitation summary for protein	129/126	0.772	19	1.043	*	130/126	0.916	20	1.055	*	131/126	0.945	18	1.019	*	129/127	0.715	20	1.095	*	130/127	0.783	19	1.085	*	131/127	0.896	20	[1.115]		129/128	0.949	20	1.056	*	130/128	1.12
1178	gi|53136422	hypothetical protein RCJMB04_28m8 [Gallus gallus]	449	21322	21	21	7	7	53.1	8.71	3.32	Quantitation summary for protein	129/126	0.883	19	1.115	*	130/126	0.936	19	1.152		131/126	0.907	20	[1.081]		129/127	0.813	20	[1.222]		130/127	0.872	19	[1.388]		131/127	0.897	20	[1.324]		129/128	0.638	19	1.192	*	130/128	0.684
1179	gi|122723	RecName: Full=Hemoglobin subunit epsilon; AltName: Full=Epsilon-globin; AltName: Full=Hemoglobin epsilon chain	448	19285	64	37	7	6	33.3	9.07	3.25	Quantitation summary for protein	129/126	1.027	2	1.01		130/126	0.833	2	1.062		131/126	0.701	2	1.04	*	129/127	2.119	2	1.394		130/127	1.681	2	1.467		131/127	1.503	2	1.328		129/128	1.761	2	1.149		130/128	1.409
1180	gi|289825	thrombin [Gallus gallus]	448	80518	37	30	17	16	26.7	5.47	0.89	Quantitation summary for protein	129/126	0.918	32	1.036	*	130/126	0.95	32	1.04	*	131/126	0.656	32	[1.050]		129/127	0.924	32	[1.220]		130/127	0.935	32	[1.239]		131/127	0.687	32	[1.203]		129/128	0.814	32	[1.078]		130/128	0.832
1181	gi|118101546	PREDICTED: syntaxin-12 [Gallus gallus]	448	34616	14	14	6	6	19.9	5.14	1.08	Quantitation summary for protein	129/126	1.252	14	1.071	*	130/126	1.231	14	1.076	*	131/126	1.228	14	[1.061]		129/127	1.344	13	1.159	*	130/127	1.184	14	[1.271]		131/127	1.256	14	[1.329]		129/128	1.424	13	1.129	*	130/128	1.312
1182	gi|12053819	tetranectin [Gallus gallus]	447	27198	15	15	5	5	41.3	6.88	0.78	Quantitation summary for protein	129/126	0.707	15	1.075	*	130/126	0.692	14	1.093	*	131/126	0.626	15	1.037	*	129/127	0.809	15	1.123	*	130/127	0.79	15	1.181	*	131/127	0.745	15	1.16	*	129/128	0.68	15	1.065	*	130/128	0.67
[truncated: 2,502 more rows]
[truncated: 8 more columns]

## Sheet: Quantified Proteins
Header	--------------------------------------------------------
Search title	Gallus TMT6plex Jan15
Timestamp	2015-02-03T15:31:31Z
User	Sheng
Email	sz14
[truncated: 3,175 more rows]
[truncated: 7 more columns]
