# Supplementary material for: Module 7: Multilevel Models for Binary Responses (Technical Appendix: A Primer on Estimation of Multilevel Binary Response Models)
Source: Royal Society of Chemistry journal article supplement (doi:10.1039/c9fo02861g), 2009-01-01
Supplement: c9fo02861g2.xlsx [file c9fo02861g2.xlsx]

## Sheet: Protein Summary
Header	--------------------------------------------------------
Search title	Gallus TMT6plex Jan15
Timestamp	2015-01-24T12:41:19Z
User	Sheng
Email	sz14
Report URI	http://mascot.biotech.cornell.edu/mascot/cgi/master_results.pl?file=../data/20150124/F402837.dat
Peak list data path	D:\data\20150115\Xingen10325634TMT6plexSetGZmerged.mgf
Peak list format	Mascot generic
Search type	MIS
Mascot version	2.3.02
Database	gallus
Fasta file	GallusRefSeq1Apr13.fasta
Total sequences	37321
Total residues	16201765
Sequences after taxonomy filter	37321
Number of queries	458319
Warning	Cache file ../data/cache/2015/01/7pifl3ua43pxdrwjxzpswscsae/F402837.dat.r2vvypdmwdjqdifynacxajzbjm.cdb was not complete. Re-creating the cache file
Decoy	--------------------------------------------------------
			FDR %
Number of matches above identity threshold in search of real database	100793
Number of matches above identity threshold in search of decoy database	1521		1.5
Number of matches above homology threshold in search of real database	114106
Number of matches above homology threshold in search of decoy database	3108
Fixed modifications	--------------------------------------------------------
Identifier	Name	Delta	Neutral loss
1	Carbamidomethyl (C)	57.0215
2	TMT6plex (N-term)	229.163
3	TMT6plex (K)	229.163
Variable modifications	--------------------------------------------------------
Identifier	Name	Delta	Neutral loss(es)
1	Deamidated (NQ)	0.984016
2	Oxidation (M)	15.9949	0	63.9983
Search Parameters	--------------------------------------------------------
Taxonomy filter	All entries
Enzyme	Trypsin
Maximum Missed Cleavages	2
Fixed modifications	Carbamidomethyl (C),TMT6plex (N-term),TMT6plex (K)
Quantitation method	TMT 6plex_9 ratios_Yumei
Variable modifications	Deamidated (NQ),Oxidation (M)
Peptide Mass Tolerance	15
Peptide Mass Tolerance Units	ppm
Fragment Mass Tolerance	100
Fragment Mass Tolerance Units	mmu
Mass values	Monoisotopic
Instrument type	Default
Decoy database also searched	1
Format parameters	--------------------------------------------------------
Significance threshold	0.05
Max. number of hits	0
Use MudPIT protein scoring	1
Ions score cut-off	20
Include same-set proteins
Include sub-set proteins	0
Include unassigned	0
Require bold red	1
Use homology threshold	0
Group protein families	0
Re-score using Percolator	0
Protein hits	--------------------------------------------------------
prot_hit_num	prot_acc	prot_desc	prot_score	prot_mass	prot_matches	prot_matches_sig	prot_sequences	prot_sequences_sig	prot_cover	prot_pi	emPAI
1	gi|319655768	fatty acid synthase [Gallus gallus]	25240	307128	1015	850	113	92	47.4	5.92	10.94	Quantitation summary for protein	129/126	1.152	115	[1.247]		130/126	0.963	115	[1.161]		131/126	0.457	115	1.241	*	129/127	0.882	116	[1.203]		130/127	0.742	116	[1.111]		131/127	0.354	116	[1.242]		129/128	1.006	116	[1.178]		130/128	0.836
2	gi|113610	RecName: Full=Fructose-bisphosphate aldolase B; AltName: Full=Liver-type aldolase	22441	45858	837	685	40	39	96.7	8.81	1120.13	Quantitation summary for protein	129/126	0.808	696	[1.071]		130/126	1.186	702	[1.069]		131/126	1.476	710	[1.138]		129/127	0.619	696	[1.094]		130/127	0.914	700	[1.051]		131/127	1.137	707	[1.119]		129/128	0.818	698	[1.043]		130/128	1.194
3	gi|2506442	RecName: Full=Glyceraldehyde-3-phosphate dehydrogenase; Short=GAPDH; AltName: Full=Peptidyl-cysteine S-nitrosylase GAPDH	22188	42097	838	725	33	29	73.6	8.71	3525.49	Quantitation summary for protein	129/126	0.749	161	[1.129]		130/126	0.915	161	[1.292]		131/126	1.051	162	[1.474]		129/127	0.739	162	[1.211]		130/127	0.909	162	[1.197]		131/127	1.046	162	[1.360]		129/128	0.924	162	[1.091]		130/128	1.121
4	gi|460907	fatty acid synthase [Gallus gallus]	22006	307192	907	752	106	85	44.7	5.94	8.47	Quantitation summary for protein	129/126	1.516	13	[1.139]		130/126	1.257	13	[1.164]		131/126	0.752	13	1.095	*	129/127	1.092	13	1.044	*	130/127	0.911	13	[1.054]		131/127	0.565	12	1.094	*	129/128	1.159	13	1.049	*	130/128	0.954
5	gi|1334725	unnamed protein product [Gallus gallus]	17926	28733	659	571	22	20	78.3	9.47	6419.91	Quantitation summary for protein	129/126	0.391	2	1.165		130/126	---	0	---		131/126	---	0	---		129/127	0.336	2	1.231		130/127	---	0	---		131/127	---	0	---		129/128	0.939	2	1.127		130/128	---
6	gi|53130384	hypothetical protein RCJMB04_7g5 [Gallus gallus]	16949	73480	525	470	52	48	82.9	5.72	379.95	Quantitation summary for protein	129/126	1.065	479	[1.042]		130/126	0.944	477	[1.058]		131/126	1.263	479	[1.096]		129/127	0.915	479	[1.059]		130/127	0.816	477	[1.047]		131/127	1.094	480	[1.088]		129/128	1.029	474	[1.034]		130/128	0.903
7	gi|974176	enolase [Gallus gallus]	15892	56097	680	585	38	33	69.4	6.17	238.38	Quantitation summary for protein	129/126	0.992	249	[1.096]		130/126	0.936	249	[1.161]		131/126	1.06	247	[1.286]		129/127	0.817	249	[1.109]		130/127	0.776	249	[1.143]		131/127	0.881	248	[1.268]		129/128	1.02	248	1.067	*	130/128	0.956
8	gi|22128505	pyruvate carboxylase [Gallus gallus]	15581	267810	622	547	67	62	61.2	6.26	4.31	Quantitation summary for protein	129/126	0.886	564	[1.039]		130/126	1.071	563	[1.052]		131/126	1.115	564	[1.089]		129/127	0.817	566	[1.049]		130/127	0.994	565	[1.039]		131/127	1.037	568	[1.078]		129/128	0.807	567	[1.033]		130/128	0.968
9	gi|63007	unnamed protein product [Gallus gallus]	14619	46734	555	483	25	22	58	5.3	117.64	Quantitation summary for protein	129/126	0.888	129	1.098	*	130/126	0.96	130	[1.226]		131/126	1.252	130	[1.129]		129/127	0.998	128	[1.125]		130/127	1.086	129	[1.223]		131/127	1.41	129	[1.122]		129/128	0.8	125	1.084	*	130/128	0.862
10	gi|448261627	ATP synthase subunit beta, mitochondrial precursor [Gallus gallus]	13331	61692	503	440	33	29	74.5	5.44	152.67	Quantitation summary for protein	129/126	0.765	460	[1.066]		130/126	1.103	459	[1.072]		131/126	1.449	459	[1.145]		129/127	0.594	459	[1.100]		130/127	0.862	459	[1.085]		131/127	1.135	459	[1.151]		129/128	0.809	457	[1.049]		130/128	1.159
11	gi|110591367	Chain A, The Structure Of Chicken Mitochondrial Pepck.	13035	71676	530	452	47	45	88	6.55	204.82	Quantitation summary for protein	129/126	0.78	479	[1.049]		130/126	0.996	478	[1.055]		131/126	0.746	478	[1.087]		129/127	0.716	481	[1.062]		130/127	0.92	480	[1.044]		131/127	0.691	479	[1.081]		129/128	0.903	479	[1.030]		130/128	1.146
12	gi|363745506	PREDICTED: ATP synthase subunit alpha, mitochondrial [Gallus gallus]	12898	67037	424	357	41	34	59.9	9.04	42.77	Quantitation summary for protein	129/126	0.529	115	[1.139]		130/126	1.072	116	[1.164]		131/126	1.442	117	[1.177]		129/127	0.423	116	[1.119]		130/127	0.862	117	[1.087]		131/127	1.163	117	[1.097]		129/128	0.655	114	[1.113]		130/128	1.317
13	gi|63739	prolyl-4-hydroxylase (AA 5 - 494) [Gallus gallus]	12546	65486	480	408	43	34	61	4.66	77.02	Quantitation summary for protein	129/126	1.158	430	[1.047]		130/126	0.966	431	[1.090]		131/126	1.139	429	[1.160]		129/127	1.049	432	[1.074]		130/127	0.881	433	[1.058]		131/127	1.041	431	[1.132]		129/128	1.31	433	[1.037]		130/128	1.087
14	gi|211827	78-kD glucose-regulated protein precursor [Gallus gallus]	12443	86067	584	476	60	52	65.2	5.12	62.47	Quantitation summary for protein	129/126	1.391	476	[1.034]		130/126	1.114	473	[1.040]		131/126	1.898	475	[1.092]		129/127	1.336	480	[1.049]		130/127	1.077	477	[1.033]		131/127	1.842	479	[1.083]		129/128	1.644	481	[1.028]		130/128	1.311
15	gi|119359	RecName: Full=Endoplasmin; AltName: Full=Heat shock 108 kDa protein; Short=HSP 108; Short=HSP108; AltName: Full=Heat shock protein 90 kDa beta member 1; AltName: Full=Transferrin-binding protein; Flags: Precursor	12433	110517	610	487	67	59	66.7	4.83	48.79	Quantitation summary for protein	129/126	3.31	6	1.33	*	130/126	0.861	6	1.207		131/126	0.414	6	1.487	*	129/127	4.038	6	1.239	*	130/127	1.08	5	1.068		131/127	0.51	6	1.309	*	129/128	3.523	6	1.128	*	130/128	0.91
16	gi|14269537	liver fatty acid binding protein [Gallus gallus]	12420	18193	451	386	14	13	86.6	7.74	4153.39	Quantitation summary for protein	129/126	1.032	406	[1.098]		130/126	1.001	406	[1.090]		131/126	1.742	406	[1.160]		129/127	0.814	409	[1.104]		130/127	0.795	409	[1.076]		131/127	1.386	409	[1.147]		129/128	1.601	406	[1.072]		130/128	1.543
17	gi|127759	RecName: Full=Myosin-9; AltName: Full=Cellular myosin heavy chain, type A; AltName: Full=Myosin heavy chain 9; AltName: Full=Myosin heavy chain, non-muscle IIa; AltName: Full=Non-muscle myosin heavy chain A; Short=NMMHC-A; AltName: Full=Non-muscle m	11792	275571	462	398	108	93	49.9	5.47	4.83	Quantitation summary for protein	129/126	1.088	328	[1.023]		130/126	0.809	328	[1.031]		131/126	0.456	328	[1.056]		129/127	1.522	328	[1.037]		130/127	1.14	328	[1.019]		131/127	0.643	328	[1.040]		129/128	1.021	328	[1.013]		130/128	0.754
18	gi|53135040	hypothetical protein RCJMB04_24e12 [Gallus gallus]	11763	28646	491	419	24	20	81.9	6.97	2464.67	Quantitation summary for protein	129/126	0.817	79	[1.105]		130/126	0.961	79	[1.089]		131/126	1.313	79	[1.121]		129/127	0.699	79	[1.147]		130/127	0.827	79	[1.109]		131/127	1.133	79	[1.134]		129/128	1.183	79	1.092	*	130/128	1.378
19	gi|1094420	fatty acid-binding protein	10929	17565	464	401	18	16	78.4	8.69	3307.07	Quantitation summary for protein	129/126	0.835	420	[1.087]		130/126	0.795	419	[1.081]		131/126	0.841	420	[1.146]		129/127	0.69	420	[1.119]		130/127	0.661	420	[1.066]		131/127	0.702	421	[1.133]		129/128	1.055	421	[1.050]		130/128	0.997
20	gi|22651801	glucose regulated thiol oxidoreductase protein precursor [Gallus gallus]	10753	68462	408	330	47	41	72.5	5.76	50.14	Quantitation summary for protein	129/126	1.344	364	[1.055]		130/126	1.136	365	[1.049]		131/126	1.437	364	[1.087]		129/127	1.348	363	[1.081]		130/127	1.147	364	1.03	*	131/127	1.455	363	[1.065]		129/128	1.548	364	[1.035]		130/128	1.3
21	gi|60098703	hypothetical protein RCJMB04_6f14 [Gallus gallus]	10415	139440	477	407	65	60	58.3	7.54	15.88	Quantitation summary for protein	129/126	1.121	327	[1.052]		130/126	0.922	322	[1.064]		131/126	0.685	321	[1.101]		129/127	0.973	328	[1.066]		130/127	0.805	323	[1.046]		131/127	0.599	321	[1.090]		129/128	1.183	327	[1.024]		130/128	0.967
22	gi|63748	preproalbumin (serum albumin) [Gallus gallus]	10159	83097	531	423	49	42	68.1	5.51	81.19	Quantitation summary for protein	129/126	0.504	471	[1.087]		130/126	0.769	474	[1.087]		131/126	0.515	474	[1.160]		129/127	0.445	471	[1.097]		130/127	0.683	474	[1.060]		131/127	0.459	474	[1.134]		129/128	0.482	471	1.062	*	130/128	0.73
23	gi|50758110	PREDICTED: malate dehydrogenase, mitochondrial [Gallus gallus]	9908	43130	351	319	30	28	80.6	8.83	119.57	Quantitation summary for protein	129/126	0.927	341	[1.037]		130/126	0.985	340	[1.044]		131/126	1.457	341	[1.067]		129/127	0.73	341	[1.049]		130/127	0.781	340	[1.034]		131/127	1.158	341	[1.058]		129/128	0.971	339	[1.027]		130/128	1.025
24	gi|53130600	hypothetical protein RCJMB04_8o6 [Gallus gallus]	9847	67023	361	307	38	36	64.8	8.41	57.32	Quantitation summary for protein	129/126	0.788	43	[1.111]		130/126	0.767	43	[1.112]		131/126	1.062	43	[1.158]		129/127	0.756	43	[1.115]		130/127	0.741	43	[1.113]		131/127	1.028	43	[1.153]		129/128	0.908	43	[1.089]		130/128	0.878
25	gi|363739855	PREDICTED: aldehyde dehydrogenase, mitochondrial isoform 2 [Gallus gallus]	9343	65575	397	353	37	34	63.6	7.92	48.89	Quantitation summary for protein	129/126	0.769	361	[1.060]		130/126	1.124	361	[1.087]		131/126	1.019	361	[1.147]		129/127	0.599	360	[1.082]		130/127	0.882	361	[1.062]		131/127	0.801	362	[1.129]		129/128	0.738	360	[1.038]		130/128	1.072
26	gi|363736327	PREDICTED: d-3-phosphoglycerate dehydrogenase [Gallus gallus]	9017	62408	320	277	35	33	75.2	8.43	73.75	Quantitation summary for protein	129/126	1.352	292	[1.033]		130/126	1.021	291	[1.035]		131/126	0.996	289	[1.062]		129/127	1.32	291	[1.047]		130/127	1.003	291	[1.028]		131/127	0.981	288	[1.053]		129/128	1.09	293	[1.019]		130/128	0.818
27	gi|14278285	Chain A, Crystal Structure Of Avian Atic, A Bifunctional Transformylase And Cyclohydrolase Enzyme In Purine Biosynthesis At 1.75 Ang. Resolution	8904	73395	376	310	50	43	73.9	8.4	78.53	Quantitation summary for protein	129/126	0.981	333	[1.041]		130/126	0.938	334	[1.069]		131/126	1.332	333	[1.118]		129/127	0.806	333	[1.071]		130/127	0.775	334	1.048	*	131/127	1.105	334	[1.097]		129/128	0.83	331	[1.030]		130/128	0.788
28	gi|50762393	PREDICTED: fructose-1,6-bisphosphatase 1 [Gallus gallus]	8785	43237	379	313	34	28	72.6	8.07	385.38	Quantitation summary for protein	129/126	0.981	334	[1.072]		130/126	0.997	335	[1.066]		131/126	1.373	333	[1.141]		129/127	0.843	334	[1.093]		130/127	0.862	335	[1.049]		131/127	1.183	333	[1.126]		129/128	0.917	334	[1.038]		130/128	0.926
29	gi|62899	glycinamide ribonucleotide synthetase-aminoimidazole ribonucleotide synthetase-glycinamide ribonucleotide transformylase [Gallus gallus]	8700	124289	310	277	59	52	59.7	7.51	12.41	Quantitation summary for protein	129/126	2.029	23	[1.038]		130/126	1.022	23	1.02	*	131/126	0.975	23	1.036	*	129/127	2.27	23	[1.040]		130/127	1.151	23	1.025	*	131/127	1.101	23	1.033	*	129/128	1.703	23	1.027	*	130/128	0.855
30	gi|102221132	apolipoprotein B [Gallus gallus]	8634	608851	415	350	128	115	27.9	8.51	1.13	Quantitation summary for protein	129/126	1.088	361	[1.014]		130/126	0.909	361	[1.019]		131/126	0.654	361	[1.038]		129/127	1.323	361	[1.021]		130/127	1.113	361	[1.015]		131/127	0.803	361	[1.029]		129/128	0.984	361	[1.013]		130/128	0.817
31	gi|68299602	glycinamide ribonucleotide synthetase-aminoimidazole ribonucleotide synthetase-glycinamide ribonucleotide transformylase [Gallus gallus]	8565	124274	305	271	60	52	60.3	7.51	12.41	Quantitation summary for protein	129/126	0.28	19	[1.202]		130/126	0.909	19	1.022	*	131/126	0.735	19	1.043	*	129/127	0.217	19	[1.219]		130/127	0.712	19	1.026	*	131/127	0.577	19	[1.057]		129/128	0.281	19	[1.197]		130/128	0.907
32	gi|22506897	UDP-glucose pyrophosphorylase [Gallus gallus]	8564	67058	330	281	37	35	60.4	8.41	47.17	Quantitation summary for protein	129/126	0.822	11	1.083	*	130/126	0.889	11	1.07	*	131/126	1.362	11	1.123	*	129/127	0.823	11	[1.095]		130/127	0.897	11	1.042	*	131/127	1.376	11	1.091	*	129/128	0.927	11	1.09	*	130/128	0.997
33	gi|63417	alpha-globin [Gallus gallus]	8554	18492	397	337	17	16	85.8	7.01	2180.77	Quantitation summary for protein	129/126	---	0	---		130/126	---	0	---		131/126	---	0	---		129/127	---	0	---		130/127	---	0	---		131/127	---	0	---		129/128	---	0	---		130/128	---
34	gi|118092411	PREDICTED: glutamate dehydrogenase 1, mitochondrial [Gallus gallus]	8343	55068	361	314	28	24	59.4	8.34	35.64	Quantitation summary for protein	129/126	0.805	145	[1.055]		130/126	1.358	148	[1.094]		131/126	2.264	148	[1.136]		129/127	0.632	145	[1.089]		130/127	0.955	147	1.052	*	131/127	1.563	148	[1.089]		129/128	0.7	145	[1.040]		130/128	1.17
35	gi|26000436	talin [Gallus gallus]	8332	315489	307	263	92	78	43.3	5.9	2.29	Quantitation summary for protein	129/126	1.05	238	[1.017]		130/126	0.96	238	[1.027]		131/126	0.604	239	1.046	*	129/127	1.35	238	[1.025]		130/127	1.244	238	[1.024]		131/127	0.784	239	1.035	*	129/128	0.915	238	[1.014]		130/128	0.832
36	gi|63634	unnamed protein product [Gallus gallus]	8330	277045	298	262	91	76	44.5	5.5	2.75	Quantitation summary for protein	129/126	0.847	166	[1.034]		130/126	1.046	166	[1.044]		131/126	0.503	166	[1.078]		129/127	1.213	166	[1.052]		130/127	1.508	166	[1.031]		131/127	0.727	166	[1.054]		129/128	0.903	166	[1.018]		130/128	1.108
37	gi|116669	RecName: Full=Acetyl-CoA carboxylase; Short=ACC; Includes: RecName: Full=Biotin carboxylase	8256	289586	345	299	81	74	36.4	6.02	2.7	Quantitation summary for protein	129/126	1.127	278	[1.025]		130/126	0.91	278	[1.036]		131/126	0.609	275	[1.061]		129/127	0.994	278	[1.040]		130/127	0.808	278	[1.027]		131/127	0.542	275	[1.057]		129/128	1.215	278	[1.021]		130/128	0.974
38	gi|211118	alpha-globin-D [Gallus gallus]	8221	18601	366	307	19	16	79.4	7.82	1767.86	Quantitation summary for protein	129/126	0.821	37	[1.047]		130/126	0.939	35	1.03	*	131/126	1.053	37	1.062	*	129/127	0.767	37	[1.051]		130/127	0.924	37	1.038	*	131/127	0.984	36	1.046	*	129/128	1.019	37	[1.041]		130/128	1.19
39	gi|383087734	ribosome-binding protein 1 [Gallus gallus]	8090	138715	350	277	71	60	66.2	5.29	10.52	Quantitation summary for protein	129/126	1.666	303	[1.033]		130/126	1.258	302	[1.039]		131/126	1.299	303	[1.073]		129/127	1.591	301	[1.048]		130/127	1.21	301	[1.023]		131/127	1.253	301	[1.059]		129/128	1.804	303	1.025	*	130/128	1.354
40	gi|17225596	ATP synthase alpha subunit [Gallus gallus]	8085	67596	297	252	36	30	49.7	9.29	21.91	Quantitation summary for protein	129/126	---	1	---		130/126	---	1	---		131/126	---	1	---		129/127	---	1	---		130/127	---	1	---		131/127	---	1	---		129/128	---	1	---		130/128	---
41	gi|118534	RecName: Full=Glutamate dehydrogenase 1, mitochondrial; Short=GDH 1	7970	64325	361	311	36	33	60.6	8.48	33.29	Quantitation summary for protein	129/126	0.78	145	[1.143]		130/126	1.222	148	[1.207]		131/126	1.737	148	[1.382]		129/127	0.602	145	[1.228]		130/127	0.872	148	[1.154]		131/127	1.243	148	[1.316]		129/128	0.717	145	[1.090]		130/128	1.108
42	gi|63013	alpha-D globin [Gallus gallus]	7821	18291	342	295	14	14	85.8	7.01	729.15	Quantitation summary for protein	129/126	---	1	---		130/126	---	1	---		131/126	---	1	---		129/127	---	1	---		130/127	---	1	---		131/127	---	1	---		129/128	---	1	---		130/128	---
43	gi|63516	unnamed protein product [Gallus gallus]	7814	102968	326	276	53	42	60.9	5.01	15.18	Quantitation summary for protein	129/126	1.066	221	[1.042]		130/126	0.926	219	[1.066]		131/126	1.146	219	[1.114]		129/127	1.104	219	[1.055]		130/127	0.966	218	[1.045]		131/127	1.197	219	[1.094]		129/128	1.14	221	[1.020]		130/128	0.985
44	gi|157703520	microsomal triglyceride transfer protein large subunit [Gallus gallus]	7780	154043	302	262	45	41	39.2	8.84	5.2	Quantitation summary for protein	129/126	1.163	276	[1.045]		130/126	0.925	276	[1.052]		131/126	1.091	276	[1.100]		129/127	1.087	276	[1.055]		130/127	0.871	276	[1.046]		131/127	1.029	276	[1.093]		129/128	1.494	276	[1.032]		130/128	1.181
45	gi|124339781	clathrin heavy chain 1 [Gallus gallus]	7770	215943	263	234	57	53	40.4	5.52	2.58	Quantitation summary for protein	129/126	1.098	145	[1.035]		130/126	0.943	144	[1.050]		131/126	0.569	142	[1.100]		129/127	1.5	144	[1.059]		130/127	1.311	143	1.042	*	131/127	0.78	142	[1.076]		129/128	1.029	145	[1.023]		130/128	0.878
46	gi|63027	alpha-cardiac actin [Gallus gallus]	7762	46917	374	313	22	18	44.6	5.23	25.05	Quantitation summary for protein	129/126	0.797	11	1.069	*	130/126	1.335	11	1.066	*	131/126	1.103	11	1.036	*	129/127	0.994	11	1.061		130/127	1.676	11	1.097	*	131/127	1.388	11	1.075	*	129/128	0.801	11	1.098	*	130/128	1.332
47	gi|153792017	tubulin beta-3 chain [Gallus gallus]	7663	53952	382	328	23	22	58.4	4.78	55.23	Quantitation summary for protein	129/126	0.88	21	1.043	*	130/126	0.996	22	1.041		131/126	0.947	22	1.061	*	129/127	1.11	21	1.037	*	130/127	1.188	21	1.047	*	131/127	1.202	22	1.068	*	129/128	1.086	22	1.053	*	130/128	1.234
48	gi|30575684	glycogen phosphorylase [Gallus gallus]	7611	110533	314	255	58	43	62.3	6.08	13.63	Quantitation summary for protein	129/126	0.985	240	[1.038]		130/126	0.872	241	[1.043]		131/126	0.826	234	[1.079]		129/127	0.9	239	[1.039]		130/127	0.802	240	[1.035]		131/127	0.76	233	[1.070]		129/128	0.93	240	[1.020]		130/128	0.817
49	gi|63167	unnamed protein product [Gallus gallus]	7468	53762	365	318	22	21	58.3	4.78	46.81	Quantitation summary for protein	129/126	0.933	31	1.095	*	130/126	0.974	31	1.06	*	131/126	0.783	31	1.082	*	129/127	1.107	31	[1.116]		130/127	1.163	31	1.068	*	131/127	0.937	31	1.097	*	129/128	1.122	31	1.064	*	130/128	1.163
50	gi|2737971	CFR-associated protein p70 [Gallus gallus]	7357	98713	293	263	35	35	53.4	9.19	12.62	Quantitation summary for protein	129/126	0.853	275	[1.031]		130/126	0.913	275	[1.039]		131/126	0.794	273	[1.077]		129/127	0.903	276	[1.037]		130/127	0.973	276	[1.030]		131/127	0.848	274	[1.070]		129/128	0.721	276	[1.025]		130/128	0.766
51	gi|53136476	hypothetical protein RCJMB04_29j22 [Gallus gallus]	7233	115977	303	273	56	50	58.4	8.71	13.04	Quantitation summary for protein	129/126	1.032	286	[1.030]		130/126	0.914	285	[1.030]		131/126	0.864	286	[1.057]		129/127	0.97	287	[1.041]		130/127	0.865	286	[1.021]		131/127	0.82	287	[1.047]		129/128	0.842	287	[1.018]		130/128	0.741
52	gi|63014	alpha-A globin [Gallus gallus]	7163	18512	365	290	13	13	75.4	8.54	571.99	Quantitation summary for protein	129/126	0.611	109	[1.080]		130/126	1.299	108	[1.075]		131/126	1.56	109	[1.099]		129/127	0.502	109	[1.110]		130/127	1.073	108	1.034	*	131/127	1.292	109	1.058	*	129/128	0.799	109	[1.037]		130/128	1.687
53	gi|53127632	hypothetical protein RCJMB04_2m8 [Gallus gallus]	7159	85807	284	219	43	39	58.1	6.09	20.63	Quantitation summary for protein	129/126	0.868	258	[1.044]		130/126	1.004	258	[1.047]		131/126	1.012	258	[1.095]		129/127	0.745	258	[1.069]		130/127	0.868	258	[1.033]		131/127	0.877	258	[1.086]		129/128	0.862	258	[1.023]		130/128	0.99
54	gi|136056	RecName: Full=Triosephosphate isomerase; Short=TIM; AltName: Full=Triose-phosphate isomerase	7054	32103	245	222	25	23	93.1	6.71	112.23	Quantitation summary for protein	129/126	---	0	---		130/126	---	0	---		131/126	---	0	---		129/127	---	0	---		130/127	---	0	---		131/127	---	0	---		129/128	---	0	---		130/128	---
55	gi|755815	complement C3 precursor [Gallus gallus]	6895	210718	318	267	64	58	38.6	6.69	2.99	Quantitation summary for protein	129/126	1.359	266	[1.028]		130/126	1.005	265	[1.038]		131/126	1.173	265	[1.065]		129/127	1.431	265	[1.036]		130/127	1.065	265	[1.031]		131/127	1.246	265	[1.058]		129/128	1.198	265	[1.018]		130/128	0.88
56	gi|135446	RecName: Full=Tubulin beta-1 chain; AltName: Full=Beta-tubulin class-I	6860	54000	352	304	22	21	55.7	4.78	31.99	Quantitation summary for protein	129/126	1.069	5	1.072		130/126	1.148	5	1.218		131/126	1.798	5	1.303	*	129/127	0.95	5	[1.159]		130/127	1.027	5	1.06		131/127	1.612	5	1.212	*	129/128	0.983	5	1.04		130/128	1.048
57	gi|53130364	hypothetical protein RCJMB04_7e11 [Gallus gallus]	6803	60403	309	247	41	34	64.8	9.02	47.01	Quantitation summary for protein	129/126	0.955	251	[1.056]		130/126	1.068	251	[1.073]		131/126	1.236	250	[1.108]		129/127	0.764	251	[1.087]		130/127	0.86	251	[1.052]		131/127	0.998	250	[1.095]		129/128	0.89	251	[1.033]		130/128	0.988
58	gi|560038	PGK [Gallus gallus]	6777	55400	257	201	34	27	75.3	8.31	62.89	Quantitation summary for protein	129/126	0.978	231	[1.084]		130/126	0.924	231	[1.070]		131/126	0.975	231	[1.163]		129/127	0.918	231	[1.091]		130/127	0.874	232	[1.058]		131/127	0.925	232	[1.145]		129/128	1.021	231	[1.078]		130/128	0.959
59	gi|53126280	hypothetical protein RCJMB04_1c3 [Gallus gallus]	6743	100953	281	226	59	53	66.5	5.14	24.15	Quantitation summary for protein	129/126	1.449	52	[1.105]		130/126	1.28	52	1.087	*	131/126	1.508	52	1.144	*	129/127	1.046	52	1.129	*	130/127	0.93	52	1.058	*	131/127	1.098	52	[1.118]		129/128	1.213	52	1.043	*	130/128	1.064
60	gi|363736325	PREDICTED: hydroxymethylglutaryl-CoA synthase, mitochondrial [Gallus gallus]	6559	60808	247	207	26	24	53	8.51	16.17	Quantitation summary for protein	129/126	0.592	220	[1.067]		130/126	0.889	221	[1.087]		131/126	0.804	222	[1.175]		129/127	0.529	221	[1.077]		130/127	0.799	222	[1.070]		131/127	0.724	223	[1.159]		129/128	0.594	221	[1.046]		130/128	0.887
61	gi|363734923	PREDICTED: cytoplasmic dynein 1 heavy chain 1 [Gallus gallus]	6521	595678	330	279	112	94	26.1	6.08	0.88	Quantitation summary for protein	129/126	1.428	298	[1.020]		130/126	1.164	298	[1.032]		131/126	0.661	296	[1.048]		129/127	1.697	298	[1.032]		130/127	1.393	298	[1.024]		131/127	0.791	296	[1.035]		129/128	1.201	298	[1.012]		130/128	0.972
62	gi|4699641	Chain B, R-State Form Of Chicken Hemoglobin D	6492	19016	284	226	16	16	82.2	8.85	688.48	Quantitation summary for protein	129/126	0.723	70	1.142	*	130/126	1.013	70	[1.161]		131/126	0.545	69	[1.204]		129/127	0.841	70	[1.226]		130/127	1.187	70	1.079	*	131/127	0.638	69	[1.141]		129/128	0.808	70	1.088	*	130/128	1.125
63	gi|8133188	voltage-dependent anion channel [Gallus gallus]	6465	36481	221	192	17	16	66.1	8.61	34.18	Quantitation summary for protein	129/126	0.846	200	[1.046]		130/126	1.311	201	[1.070]		131/126	1.985	202	[1.110]		129/127	0.65	200	[1.072]		130/127	1.014	202	[1.049]		131/127	1.54	203	[1.087]		129/128	0.91	199	[1.027]		130/128	1.401
64	gi|53128146	hypothetical protein RCJMB04_4j7 [Gallus gallus]	6396	48129	227	198	24	23	59.4	8.02	34.73	Quantitation summary for protein	129/126	1.001	217	[1.044]		130/126	1.284	215	[1.057]		131/126	1.437	216	[1.091]		129/127	0.663	217	[1.065]		130/127	0.856	215	[1.038]		131/127	0.961	216	[1.081]		129/128	0.834	216	[1.033]		130/128	1.064
65	gi|363741727	PREDICTED: adenosylhomocysteinase A [Gallus gallus]	6271	101341	261	229	27	25	27.8	9.71	5.32	Quantitation summary for protein	129/126	1.033	244	[1.056]		130/126	1.11	244	[1.050]		131/126	1.035	244	[1.096]		129/127	0.829	244	[1.086]		130/127	0.897	244	[1.038]		131/127	0.838	244	[1.086]		129/128	1.053	244	[1.025]		130/128	1.125
66	gi|63033	aldehyde dehydrogenase 1 (NAD+) [Gallus gallus]	6243	66713	255	222	39	36	64.4	7.49	29.36	Quantitation summary for protein	129/126	0.762	226	[1.059]		130/126	1.036	225	[1.096]		131/126	0.818	226	[1.174]		129/127	0.765	226	1.085	*	130/127	1.047	225	[1.054]		131/127	0.829	226	[1.129]		129/128	0.613	226	[1.044]		130/128	0.828
67	gi|50982399	annexin A6 [Gallus gallus]	6195	88183	243	214	46	43	64.4	5.57	20.47	Quantitation summary for protein	129/126	0.824	71	1.04	*	130/126	0.853	72	1.04	*	131/126	1.023	72	[1.102]		129/127	0.893	71	1.05	*	130/127	0.953	72	[1.042]		131/127	1.146	72	[1.104]		129/128	0.762	72	1.035	*	130/128	0.799
68	gi|2996407	heat shock cognate 70 [Gallus gallus]	6188	83386	335	243	41	37	55.1	5.47	32.46	Quantitation summary for protein	129/126	1.109	158	[1.053]		130/126	0.878	156	[1.069]		131/126	0.955	157	[1.115]		129/127	1.086	157	[1.069]		130/127	0.867	156	1.048	*	131/127	0.934	156	[1.101]		129/128	1.162	158	[1.024]		130/128	0.915
69	gi|259675905	unnamed protein product [Gallus gallus]	6068	108150	223	203	41	38	43.1	9.37	7.31	Quantitation summary for protein	129/126	0.961	212	[1.036]		130/126	1.043	210	[1.047]		131/126	0.943	211	[1.078]		129/127	0.973	213	[1.052]		130/127	1.065	211	[1.044]		131/127	0.965	212	[1.064]		129/128	0.515	213	[1.045]		130/128	0.556
70	gi|83754919	Chain A, Crystal Structure Of Aluminum-Bound Ovotransferrin At 2.15 Angstrom Resolution	5930	91268	281	223	45	39	59.6	6.7	12.6	Quantitation summary for protein	129/126	---	0	---		130/126	---	0	---		131/126	---	0	---		129/127	---	0	---		130/127	---	0	---		131/127	---	0	---		129/128	---	0	---		130/128	---
71	gi|134800	RecName: Full=Spectrin alpha chain, non-erythrocytic 1; AltName: Full=Alpha-II spectrin; AltName: Full=Fodrin alpha chain	5837	331589	245	210	77	72	37	5.21	1.34	Quantitation summary for protein	129/126	0.989	220	[1.018]		130/126	1.547	221	[1.031]		131/126	0.91	220	[1.044]		129/127	0.96	220	[1.022]		130/127	1.513	221	[1.022]		131/127	0.892	220	[1.036]		129/128	0.806	220	[1.014]		130/128	1.253
72	gi|71274077	ovotransferrin CC type [Gallus gallus]	5833	93554	275	218	43	37	55.9	7.08	10.91	Quantitation summary for protein	129/126	---	1	---		130/126	---	1	---		131/126	---	1	---		129/127	---	1	---		130/127	---	1	---		131/127	---	1	---		129/128	---	1	---		130/128	---
73	gi|212449	nonmuscle myosin heavy chain [Gallus gallus]	5798	275470	228	194	80	70	40.4	5.42	1.88	Quantitation summary for protein	129/126	1.284	158	[1.021]		130/126	0.977	158	1.026	*	131/126	0.57	157	[1.053]		129/127	1.616	158	1.036	*	130/127	1.239	158	1.019	*	131/127	0.724	157	[1.040]		129/128	1.2	158	[1.014]		130/128	0.908
74	gi|1333620	paraoxonase 2 [Gallus gallus]	5783	44367	199	187	16	16	62.1	5.11	22.49	Quantitation summary for protein	129/126	0.757	17	1.087	*	130/126	0.941	17	1.064	*	131/126	0.897	17	[1.075]		129/127	0.855	17	1.071	*	130/127	1.071	17	1.064	*	131/127	1.023	17	[1.070]		129/128	1.012	17	1.052		130/128	1.251
75	gi|2281033	vigilin [Gallus gallus]	5752	169170	286	224	58	50	46	6.74	3.04	Quantitation summary for protein	129/126	1.423	252	[1.038]		130/126	1.152	252	[1.038]		131/126	1.023	252	[1.074]		129/127	1.168	252	[1.050]		130/127	0.952	252	[1.031]		131/127	0.847	252	[1.071]		129/128	1.332	252	[1.030]		130/128	1.072
76	gi|118085057	PREDICTED: acetyl-CoA acetyltransferase A, mitochondrial [Gallus gallus]	5705	51394	207	182	30	29	63.7	9.12	76.51	Quantitation summary for protein	129/126	0.92	188	[1.067]		130/126	1.151	189	[1.075]		131/126	1.269	190	[1.149]		129/127	0.901	185	[1.085]		130/127	1.139	188	[1.061]		131/127	1.256	187	[1.138]		129/128	0.76	190	[1.055]		130/128	0.943
77	gi|118104602	PREDICTED: alpha-aminoadipic semialdehyde dehydrogenase isoform 2 [Gallus gallus]	5681	64947	192	164	29	26	58	7.04	14.87	Quantitation summary for protein	129/126	1.2	177	[1.068]		130/126	1.432	178	[1.057]		131/126	1.822	178	[1.074]		129/127	0.718	177	[1.088]		130/127	0.863	178	[1.047]		131/127	1.1	178	[1.058]		129/128	0.988	177	[1.056]		130/128	1.172
78	gi|50731694	PREDICTED: 2,4-dienoyl-CoA reductase, mitochondrial [Gallus gallus]	5649	41795	244	219	19	19	56	9.46	47.29	Quantitation summary for protein	129/126	0.834	230	[1.052]		130/126	0.787	229	[1.076]		131/126	0.935	229	[1.104]		129/127	0.9	229	[1.071]		130/127	0.855	229	[1.059]		131/127	1.018	229	[1.089]		129/128	0.774	229	1.037	*	130/128	0.726
79	gi|15420977	malic enzyme [Gallus gallus]	5613	70323	241	184	32	28	65.2	6.45	17.51	Quantitation summary for protein	129/126	0.762	184	[1.056]		130/126	1.06	184	[1.056]		131/126	0.782	183	[1.096]		129/127	0.578	185	[1.081]		130/127	0.81	184	[1.050]		131/127	0.598	182	[1.098]		129/128	1.066	183	[1.042]		130/128	1.476
80	gi|488468	elongation factor 1 alpha [Gallus gallus]	5601	61467	283	224	26	18	53.2	9.1	16.55	Quantitation summary for protein	129/126	1.312	182	[1.081]		130/126	1.112	178	[1.084]		131/126	1.157	179	[1.160]		129/127	1.239	177	[1.100]		130/127	1.057	176	[1.065]		131/127	1.103	176	[1.145]		129/128	1.353	182	1.063	*	130/128	1.141
81	gi|211114	alpha-globin-A [Gallus gallus]	5537	18700	302	224	13	12	71.8	9.1	334.73	Quantitation summary for protein	129/126	0.5	44	1.093	*	130/126	1.88	44	[1.082]		131/126	2.602	44	[1.121]		129/127	0.317	44	[1.122]		130/127	1.2	44	1.043	*	131/127	1.665	44	1.08	*	129/128	0.793	44	1.038	*	130/128	2.965
82	gi|363736119	PREDICTED: glycerol-3-phosphate dehydrogenase 1-like protein [Gallus gallus]	5417	45023	215	185	28	23	75.1	6.28	23.08	Quantitation summary for protein	129/126	0.746	183	[1.043]		130/126	0.892	183	[1.050]		131/126	0.959	183	[1.084]		129/127	0.72	183	[1.055]		130/127	0.867	183	[1.042]		131/127	0.934	183	[1.079]		129/128	0.751	182	1.027	*	130/128	0.893
83	gi|363739843	PREDICTED: 4-hydroxyphenylpyruvate dioxygenase [Gallus gallus]	5362	52612	209	184	28	28	65.9	6.41	28.99	Quantitation summary for protein	129/126	0.977	194	[1.098]		130/126	0.786	194	[1.156]		131/126	0.839	193	[1.304]		129/127	0.779	193	[1.132]		130/127	0.633	194	[1.106]		131/127	0.683	194	[1.263]		129/128	0.904	194	[1.051]		130/128	0.723
84	gi|53132642	hypothetical protein RCJMB04_13l7 [Gallus gallus]	5314	87097	322	252	52	44	65.6	4.96	23.83	Quantitation summary for protein	129/126	1.449	277	[1.042]		130/126	1.267	276	[1.055]		131/126	2.058	274	[1.104]		129/127	1.344	276	[1.065]		130/127	1.183	276	[1.040]		131/127	1.925	274	[1.084]		129/128	1.572	276	[1.032]		130/128	1.365
85	gi|53133792	hypothetical protein RCJMB04_20f2 [Gallus gallus]	5270	78820	251	197	37	35	51.5	7.94	15.67	Quantitation summary for protein	129/126	0.793	208	[1.027]		130/126	1.121	208	[1.038]		131/126	0.882	207	[1.061]		129/127	0.777	210	[1.039]		130/127	1.105	209	[1.026]		131/127	0.872	208	[1.051]		129/128	0.797	210	1.019	*	130/128	1.12
86	gi|118102025	PREDICTED: dihydrolipoyllysine-residue acetyltransferase component of pyruvate dehydrogenase complex, mitochondrial [Gallus gallus]	5263	81269	218	195	26	24	42.6	8.84	6.52	Quantitation summary for protein	129/126	0.788	204	[1.040]		130/126	1.037	203	1.034	*	131/126	1.424	206	[1.062]		129/127	0.601	204	1.048	*	130/127	0.797	203	1.03	*	131/127	1.097	206	[1.060]		129/128	0.877	202	[1.027]		130/128	1.147
87	gi|319918842	serum paraoxonase/arylesterase 2 precursor [Gallus gallus]	5187	44293	184	171	16	16	60.2	5.17	21.03	Quantitation summary for protein	129/126	1.04	2	1.075		130/126	1.036	2	1.146		131/126	1.033	2	1.124		129/127	1.203	2	1.088		130/127	1.206	2	1.341		131/127	1.204	2	1.315		129/128	1.347	2	1.065		130/128	1.332
88	gi|363747252	PREDICTED: transitional endoplasmic reticulum ATPase-like, partial [Gallus gallus]	5180	66112	220	182	43	40	74	4.9	45.02	Quantitation summary for protein	129/126	0.848	3	1.105		130/126	0.792	3	1.01	*	131/126	0.698	3	1.118	*	129/127	1.136	3	1.046	*	130/127	1.068	3	1.054		131/127	0.943	3	1.094		129/128	0.851	3	1.06	*	130/128	0.789
89	gi|53133742	hypothetical protein RCJMB04_19o8 [Gallus gallus]	5176	54675	193	164	25	22	45.2	8.34	23.87	Quantitation summary for protein	129/126	0.673	182	[1.053]		130/126	0.856	182	[1.071]		131/126	0.888	181	[1.133]		129/127	0.566	182	1.065	*	130/127	0.725	182	[1.055]		131/127	0.753	181	[1.121]		129/128	0.717	182	[1.030]		130/128	0.906
90	gi|363743392	PREDICTED: alpha-2-macroglobulin-like protein 1-like [Gallus gallus]	5162	180603	245	199	48	38	38.3	5.92	2.44	Quantitation summary for protein	129/126	2.044	217	[1.042]		130/126	1.311	217	[1.043]		131/126	1.918	217	[1.068]		129/127	1.494	218	[1.047]		130/127	0.965	218	[1.029]		131/127	1.415	218	[1.054]		129/128	2.021	218	1.032	*	130/128	1.288
91	gi|53126523	hypothetical protein RCJMB04_1e8 [Gallus gallus]	5125	33681	241	204	23	22	72.9	4.63	82.31	Quantitation summary for protein	129/126	1.058	196	[1.067]		130/126	0.915	198	[1.157]		131/126	0.909	197	[1.229]		129/127	1.106	196	[1.121]		130/127	0.96	198	[1.108]		131/127	0.954	196	[1.168]		129/128	1.121	195	[1.042]		130/128	0.949
92	gi|212873	vinculin [Gallus gallus]	5106	134912	185	151	60	51	56.8	6	4.74	Quantitation summary for protein	129/126	1.071	175	[1.020]		130/126	1.174	175	[1.023]		131/126	0.872	175	[1.054]		129/127	0.982	175	[1.029]		130/127	1.083	175	1.017	*	131/127	0.807	175	[1.046]		129/128	1.076	175	[1.014]		130/128	1.171
93	gi|363731013	PREDICTED: dihydropyrimidinase [Gallus gallus]	5060	66817	178	159	21	17	46.1	5.73	3.87	Quantitation summary for protein	129/126	0.673	167	[1.040]		130/126	1.009	167	[1.038]		131/126	0.949	167	[1.055]		129/127	0.546	167	[1.057]		130/127	0.823	167	1.025	*	131/127	0.777	167	[1.044]		129/128	0.767	167	1.023	*	130/128	1.142
94	gi|24637100	aconitase precursor [Gallus gallus]	5050	99827	202	163	39	30	50.3	8.05	6.89	Quantitation summary for protein	129/126	0.851	175	[1.043]		130/126	1.006	176	[1.089]		131/126	0.877	176	[1.137]		129/127	0.684	176	[1.074]		130/127	0.815	176	[1.060]		131/127	0.714	176	[1.105]		129/128	0.79	175	[1.032]		130/128	0.928
95	gi|3645997	apolipoprotein AIV [Gallus gallus]	5004	44495	156	146	30	27	76.2	4.8	37.47	Quantitation summary for protein	129/126	0.837	149	[1.044]		130/126	0.89	149	[1.059]		131/126	1.211	150	[1.107]		129/127	0.606	149	[1.062]		130/127	0.649	150	[1.051]		131/127	0.885	150	[1.100]		129/128	0.866	148	[1.031]		130/128	0.915
96	gi|392018	filamin [Gallus gallus]	4965	316763	186	151	57	47	24.4	5.61	0.89	Quantitation summary for protein	129/126	1.169	155	[1.034]		130/126	1.166	155	[1.036]		131/126	0.913	155	[1.053]		129/127	1.227	155	[1.050]		130/127	1.233	155	1.025	*	131/127	0.968	155	[1.039]		129/128	1.036	155	[1.018]		130/128	1.027
97	gi|363739726	PREDICTED: enoyl-CoA delta isomerase 1, mitochondrial [Gallus gallus]	4961	38653	200	156	18	17	53.9	9.3	46.65	Quantitation summary for protein	129/126	0.968	173	[1.068]		130/126	0.915	174	[1.086]		131/126	0.953	175	[1.119]		129/127	0.927	173	[1.090]		130/127	0.883	174	[1.070]		131/127	0.922	175	[1.097]		129/128	0.878	173	1.04	*	130/128	0.825
98	gi|211139	anchorin CII [Gallus gallus]	4959	41560	252	215	39	35	80.1	5.6	156.1	Quantitation summary for protein	129/126	1.077	228	[1.097]		130/126	0.895	228	[1.103]		131/126	1.012	227	[1.171]		129/127	1.005	228	[1.128]		130/127	0.841	228	[1.071]		131/127	0.952	228	[1.150]		129/128	1.247	228	[1.049]		130/128	1.03
99	gi|363738173	PREDICTED: fatty acyl-CoA hydrolase precursor, medium chain isoform 2 [Gallus gallus]	4921	73073	194	164	30	26	52.9	5.24	10.22	Quantitation summary for protein	129/126	---	1	---		130/126	---	1	---		131/126	---	1	---		129/127	---	1	---		130/127	---	1	---		131/127	---	1	---		129/128	---	1	---		130/128	---
100	gi|363738171	PREDICTED: fatty acyl-CoA hydrolase precursor, medium chain isoform 1 [Gallus gallus]	4889	69953	195	163	30	25	56.4	5.32	10.92	Quantitation summary for protein	129/126	---	0	---		130/126	---	0	---		131/126	---	0	---		129/127	---	0	---		130/127	---	0	---		131/127	---	0	---		129/128	---	0	---		130/128	---
101	gi|113990	RecName: Full=Apolipoprotein A-I; Short=Apo-AI; Short=ApoA-I; AltName: Full=Apolipoprotein A1; Flags: Precursor	4861	36161	274	198	37	30	87.5	5.58	502.32	Quantitation summary for protein	129/126	0.731	30	1.158	*	130/126	1.047	30	[1.108]		131/126	1.258	30	[1.213]		129/127	0.492	30	1.172	*	130/127	0.71	30	[1.096]		131/127	0.855	30	[1.200]		129/128	0.671	30	1.151	*	130/128	1.068
102	gi|118088279	PREDICTED: sulfotransferase 6B1 [Gallus gallus]	4847	42977	209	165	23	20	56.5	5.5	46.14	Quantitation summary for protein	129/126	0.582	184	1.076	*	130/126	0.828	184	[1.119]		131/126	1.03	183	[1.194]		129/127	0.565	184	[1.111]		130/127	0.81	184	[1.079]		131/127	1.009	183	1.148		129/128	0.565	183	1.054	*	130/128	0.799
103	gi|363735083	PREDICTED: enoyl-CoA hydratase, mitochondrial [Gallus gallus]	4790	36078	204	164	23	17	69.8	8.96	42.78	Quantitation summary for protein	129/126	0.798	184	[1.063]		130/126	0.911	184	[1.104]		131/126	1.301	184	[1.195]		129/127	0.637	184	[1.088]		130/127	0.733	185	1.074	*	131/127	1.049	185	[1.157]		129/128	0.69	183	1.046	*	130/128	0.783
104	gi|223280	tubulin alpha	4772	50613	191	158	23	22	62	5	23.96	Quantitation summary for protein	129/126	1.015	24	1.051		130/126	0.962	24	1.088	*	131/126	0.878	24	[1.196]		129/127	1.057	24	[1.082]		130/127	1.009	24	1.109		131/127	0.923	24	[1.205]		129/128	1.084	24	1.069	*	130/128	1.021
105	gi|44969651	calreticulin [Gallus gallus]	4705	56017	242	183	31	27	63.1	4.41	19.58	Quantitation summary for protein	129/126	1.6	205	[1.161]		130/126	1.216	200	[1.221]		131/126	1.71	201	[1.449]		129/127	1.573	205	[1.218]		130/127	1.2	201	[1.171]		131/127	1.693	202	[1.384]		129/128	1.668	207	[1.073]		130/128	1.272
106	gi|310750374	pyruvate dehydrogenase E1 component subunit beta, mitochondrial [Gallus gallus]	4682	43433	162	150	15	15	54	5.95	11.11	Quantitation summary for protein	129/126	0.822	158	[1.080]		130/126	0.939	158	[1.065]		131/126	1.05	158	[1.098]		129/127	0.676	158	[1.097]		130/127	0.778	158	[1.056]		131/127	0.871	158	[1.079]		129/128	0.961	158	[1.052]		130/128	1.09
107	gi|211194	5-aminoimidazole ribonucleotide (AIR) carboxylase-5- aminoimidazole-4-N-succinocarboxamide ribonucleotide (SAICAR) synthetase [Gallus gallus]	4676	56087	206	170	31	27	76.5	8.18	47.44	Quantitation summary for protein	129/126	1.122	192	[1.059]		130/126	1.005	192	[1.074]		131/126	1.129	192	[1.111]		129/127	0.799	192	[1.083]		130/127	0.721	192	[1.060]		131/127	0.812	192	[1.095]		129/128	0.938	192	[1.039]		130/128	0.835
108	gi|53129426	hypothetical protein RCJMB04_5l9 [Gallus gallus]	4668	135451	181	157	43	37	42.1	5.14	3.18	Quantitation summary for protein	129/126	1.658	162	[1.065]		130/126	1.076	163	[1.069]		131/126	1.526	163	[1.141]		129/127	1.534	162	[1.091]		130/127	1.003	163	[1.049]		131/127	1.426	163	1.111	*	129/128	1.712	160	1.05	*	130/128	1.109
109	gi|53128246	hypothetical protein RCJMB04_4k19 [Gallus gallus]	4655	81447	186	156	30	27	57.7	5.16	10.55	Quantitation summary for protein	129/126	0.745	162	[1.032]		130/126	0.722	162	[1.053]		131/126	0.475	162	[1.082]		129/127	1.139	162	[1.046]		130/127	1.111	162	[1.041]		131/127	0.733	162	[1.062]		129/128	0.728	162	[1.024]		130/128	0.701
110	gi|308191432	RecName: Full=Glycine amidinotransferase, mitochondrial; AltName: Full=L-arginine:glycine amidinotransferase; AltName: Full=Transamidinase; Flags: Precursor	4609	54579	227	180	31	22	65.9	8.24	30.63	Quantitation summary for protein	129/126	0.514	201	[1.066]		130/126	1.762	201	1.063	*	131/126	0.887	202	[1.093]		129/127	0.294	201	[1.097]		130/127	1.016	202	[1.042]		131/127	0.512	202	[1.089]		129/128	0.764	200	[1.035]		130/128	2.606
111	gi|60098559	hypothetical protein RCJMB04_3m3 [Gallus gallus]	4564	67591	150	131	38	31	67.5	5.89	12.59	Quantitation summary for protein	129/126	1.111	137	1.036	*	130/126	0.927	136	[1.067]		131/126	0.968	136	[1.124]		129/127	0.995	138	[1.058]		130/127	0.836	137	[1.040]		131/127	0.877	137	[1.096]		129/128	1.106	136	[1.029]		130/128	0.915
112	gi|118094103	PREDICTED: 4-trimethylaminobutyraldehyde dehydrogenase [Gallus gallus]	4527	63415	216	173	28	23	48.4	7.81	18.75	Quantitation summary for protein	129/126	1.102	197	[1.065]		130/126	1.072	198	[1.154]		131/126	1.193	198	[1.239]		129/127	0.924	198	[1.102]		130/127	0.905	199	[1.087]		131/127	1.009	199	[1.170]		129/128	1.207	198	[1.050]		130/128	1.166
113	gi|1184958	elongation factor 2 [Gallus gallus]	4499	111239	241	190	48	41	59.3	6.4	8.88	Quantitation summary for protein	129/126	1.327	170	[1.056]		130/126	0.969	169	[1.075]		131/126	1.285	169	[1.141]		129/127	1.284	170	[1.087]		130/127	0.943	169	[1.049]		131/127	1.254	169	[1.124]		129/128	1.331	170	[1.043]		130/128	0.966
114	gi|113351	RecName: Full=Alcohol dehydrogenase 1; Short=ADH-1; AltName: Full=Alcohol dehydrogenase I	4459	48315	248	198	30	24	71	8.69	63.25	Quantitation summary for protein	129/126	0.801	33	1.199	*	130/126	1.494	33	[1.257]		131/126	1.096	33	[1.396]		129/127	0.559	33	[1.378]		130/127	1.049	33	1.124	*	131/127	0.771	33	[1.278]		129/128	0.987	33	1.054		130/128	1.83
115	gi|33521618	heterogeneous nuclear ribonucleoprotein H1-like protein [Gallus gallus]	4451	60941	163	149	13	13	36.4	5.38	2.53	Quantitation summary for protein	129/126	0.984	145	1.021	*	130/126	1.005	145	[1.026]		131/126	1.059	145	[1.041]		129/127	1.165	145	[1.030]		130/127	1.199	145	[1.027]		131/127	1.266	145	[1.035]		129/128	1.043	145	[1.020]		130/128	1.059
116	gi|33331366	phosphoglucomutase 1 [Gallus gallus]	4440	77376	207	151	42	34	61	8.98	18.08	Quantitation summary for protein	129/126	0.953	178	[1.077]		130/126	0.853	178	[1.091]		131/126	1.074	178	[1.211]		129/127	0.898	178	[1.092]		130/127	0.809	178	[1.076]		131/127	1.021	178	[1.191]		129/128	0.981	177	1.034	*	130/128	0.873
117	gi|65332	carbonic anhydrase [Gallus gallus]	4425	33284	142	133	12	12	55.4	6.56	12.01	Quantitation summary for protein	129/126	0.614	103	[1.056]		130/126	0.97	104	[1.108]		131/126	1.112	104	[1.173]		129/127	0.656	103	[1.083]		130/127	1.039	104	[1.053]		131/127	1.194	104	[1.120]		129/128	0.941	103	1.025	*	130/128	1.465
118	gi|118096822	PREDICTED: transketolase [Gallus gallus]	4318	79694	193	161	32	30	47.7	7.27	11.19	Quantitation summary for protein	129/126	0.967	175	[1.054]		130/126	1.047	175	[1.065]		131/126	1.119	175	[1.148]		129/127	0.856	175	[1.073]		130/127	0.933	175	[1.061]		131/127	0.999	175	[1.161]		129/128	1.044	175	[1.036]		130/128	1.123
119	gi|53134324	hypothetical protein RCJMB04_23a9 [Gallus gallus]	4318	42040	137	128	20	19	56.4	8.87	19.6	Quantitation summary for protein	129/126	0.708	133	[1.072]		130/126	0.976	133	1.057	*	131/126	1.145	133	[1.082]		129/127	0.624	133	[1.087]		130/127	0.866	133	[1.052]		131/127	1.019	133	[1.075]		129/128	0.734	133	[1.048]		130/128	1.006
120	gi|473701	Iron responsive element binding protein [Gallus gallus]	4195	111472	217	171	47	41	49.2	6.95	7.27	Quantitation summary for protein	129/126	1.127	182	[1.049]		130/126	1.198	182	[1.049]		131/126	1.041	182	[1.087]		129/127	0.976	183	[1.060]		130/127	1.044	182	[1.038]		131/127	0.909	183	[1.084]		129/128	1.087	183	[1.034]		130/128	1.147
121	gi|196049775	Chain A, Chicken Cytochrome Bc1 Complex Inhibited By An Iodinated Analogue Of The Polyketide Crocacin-d	4192	54793	149	132	24	21	52.7	5.95	11.27	Quantitation summary for protein	129/126	0.909	138	[1.064]		130/126	1.082	138	[1.113]		131/126	0.987	138	[1.194]		129/127	0.797	141	1.092	*	130/127	0.955	140	[1.085]		131/127	0.873	140	[1.155]		129/128	0.831	140	1.055	*	130/128	0.983
122	gi|363733876	PREDICTED: alcohol dehydrogenase 1 [Gallus gallus]	4186	48329	216	173	29	23	70.2	8.69	55.29	Quantitation summary for protein	129/126	---	0	---		130/126	---	0	---		131/126	---	0	---		129/127	---	0	---		130/127	---	0	---		131/127	---	0	---		129/128	---	0	---		130/128	---
123	gi|53127356	hypothetical protein RCJMB04_1p19 [Gallus gallus]	4177	92147	154	139	45	40	63.4	5.72	6.86	Quantitation summary for protein	129/126	0.974	143	[1.048]		130/126	1.211	143	[1.063]		131/126	1.129	143	[1.127]		129/127	0.846	143	[1.076]		130/127	1.059	143	[1.040]		131/127	0.989	143	[1.106]		129/128	0.855	143	[1.033]		130/128	1.056
124	gi|2315981	17-beta-hydroxysteroid dehydrogenase type IV [Gallus gallus]	4172	92528	178	154	41	33	55.1	8.58	6.51	Quantitation summary for protein	129/126	1.284	161	1.047	*	130/126	1.421	161	[1.065]		131/126	1.616	161	[1.109]		129/127	0.902	161	[1.064]		130/127	1.005	161	[1.056]		131/127	1.146	161	[1.100]		129/128	0.917	161	1.034	*	130/128	1.008
125	gi|53126358	hypothetical protein RCJMB04_1c14 [Gallus gallus]	4158	72717	171	141	28	24	43.2	7.4	16.64	Quantitation summary for protein	129/126	1.164	155	[1.044]		130/126	1.046	155	[1.050]		131/126	0.97	155	[1.091]		129/127	1.145	155	[1.062]		130/127	1.036	155	1.034	*	131/127	0.963	155	[1.079]		129/128	1.234	155	[1.034]		130/128	1.102
126	gi|330417943	fructose-bisphosphate aldolase C [Gallus gallus]	4147	45006	149	128	23	22	59.3	6.2	16.03	Quantitation summary for protein	129/126	1.725	109	1.054	*	130/126	1.037	109	[1.049]		131/126	1.285	108	[1.092]		129/127	1.898	108	1.077	*	130/127	1.149	108	[1.039]		131/127	1.421	107	[1.081]		129/128	1.596	109	[1.043]		130/128	0.954
127	gi|60098567	hypothetical protein RCJMB04_3m22 [Gallus gallus]	4058	92715	210	166	43	40	56.2	8.29	6.5	Quantitation summary for protein	129/126	0.931	172	[1.043]		130/126	1.161	172	[1.043]		131/126	0.774	171	[1.085]		129/127	1.034	172	[1.050]		130/127	1.299	172	[1.042]		131/127	0.868	171	[1.076]		129/128	0.712	172	[1.031]		130/128	0.883
128	gi|2358016	glutathione S-transferases CL2 [Gallus gallus]	4049	29485	206	182	23	21	84.5	6.85	394.63	Quantitation summary for protein	129/126	1.03	192	[1.070]		130/126	0.882	192	[1.122]		131/126	0.946	189	[1.208]		129/127	1.04	193	[1.114]		130/127	0.897	193	[1.093]		131/127	0.949	190	[1.161]		129/128	0.903	192	1.038	*	130/128	0.769
129	gi|303227902	acetyl-CoA acetyltransferase, cytosolic [Gallus gallus]	4006	45613	125	108	17	15	46.2	7.63	11.36	Quantitation summary for protein	129/126	0.962	106	[1.095]		130/126	0.94	106	1.126	*	131/126	1.278	106	[1.169]		129/127	0.822	107	[1.143]		130/127	0.806	107	1.101	*	131/127	1.098	106	1.123	*	129/128	0.881	107	[1.095]		130/128	0.855
130	gi|30962014	heat shock protein 70 [Gallus gallus]	4002	83160	217	156	31	28	47.2	5.66	9.18	Quantitation summary for protein	129/126	0.89	60	1.07	*	130/126	0.877	60	[1.146]		131/126	0.909	60	[1.291]		129/127	0.915	60	1.097	*	130/127	0.908	60	[1.090]		131/127	0.943	60	[1.232]		129/128	0.851	60	1.066	*	130/128	0.833
131	gi|363745231	PREDICTED: fatty acyl-CoA hydrolase precursor, medium chain-like [Gallus gallus]	3986	69789	174	142	26	21	49.6	5.44	5.89	Quantitation summary for protein	129/126	0.836	43	1.079	*	130/126	0.642	43	1.126	*	131/126	0.607	44	1.178	*	129/127	1.316	43	[1.069]		130/127	1.016	43	1.09		131/127	0.962	44	1.131	*	129/128	0.771	43	1.09	*	130/128	0.588
132	gi|44969706	chaperonin subunit 8 theta [Gallus gallus]	3919	69871	164	142	31	31	56	5.35	11.53	Quantitation summary for protein	129/126	1.142	155	[1.021]		130/126	1.108	155	[1.027]		131/126	1.288	155	[1.056]		129/127	0.961	155	[1.021]		130/127	0.939	155	[1.024]		131/127	1.094	155	[1.052]		129/128	1.152	155	[1.016]		130/128	1.11
133	gi|363727410	PREDICTED: ADP-sugar pyrophosphatase [Gallus gallus]	3871	29137	127	113	17	13	65.5	5.04	14.02	Quantitation summary for protein	129/126	0.925	116	[1.089]		130/126	0.789	115	[1.102]		131/126	0.888	117	[1.206]		129/127	0.901	116	[1.136]		130/127	0.773	115	1.067	*	131/127	0.873	117	[1.154]		129/128	0.973	115	[1.068]		130/128	0.821
134	gi|60098585	hypothetical protein RCJMB04_3n20 [Gallus gallus]	3857	69586	205	166	34	30	62.8	5.53	11.63	Quantitation summary for protein	129/126	1.122	186	[1.026]		130/126	0.979	186	[1.032]		131/126	0.987	186	[1.075]		129/127	0.983	187	[1.035]		130/127	0.864	187	[1.029]		131/127	0.873	187	[1.073]		129/128	1.116	187	[1.020]		130/128	0.968
135	gi|53128721	hypothetical protein RCJMB04_5b19 [Gallus gallus]	3855	33148	94	92	13	12	37.9	8.68	7.96	Quantitation summary for protein	129/126	1	7	1.13		130/126	1.132	7	1.07	*	131/126	0.995	7	1.154		129/127	1.067	7	1.129		130/127	1.216	7	1.103	*	131/127	1.071	7	1.127		129/128	0.908	7	1.141		130/128	1.022
136	gi|308818184	acetyl-Coenzyme A acyltransferase 1 (peroxisomal 3-oxoacyl-Coenzyme A thiolase) [Gallus gallus]	3855	50134	140	126	22	21	66.4	9.26	15.44	Quantitation summary for protein	129/126	0.825	130	[1.051]		130/126	1.009	129	[1.067]		131/126	1.427	130	[1.092]		129/127	0.791	131	[1.073]		130/127	0.975	130	[1.042]		131/127	1.382	131	[1.057]		129/128	0.449	131	[1.055]		130/128	0.546
137	gi|118092288	PREDICTED: dehydrogenase/reductase SDR family member 7 [Gallus gallus]	3842	43596	149	124	23	21	65.8	9.24	18.94	Quantitation summary for protein	129/126	1.357	133	[1.066]		130/126	1.062	132	1.052	*	131/126	0.814	130	[1.098]		129/127	1.624	130	[1.087]		130/127	1.298	130	1.054	*	131/127	0.975	129	[1.087]		129/128	0.995	132	1.034		130/128	0.785
138	gi|118093509	PREDICTED: isocitrate dehydrogenase [NADP] cytoplasmic [Gallus gallus]	3829	55451	212	171	35	27	65.1	8.02	21.46	Quantitation summary for protein	129/126	0.783	174	[1.049]		130/126	0.886	174	[1.060]		131/126	1.162	174	[1.092]		129/127	0.688	174	1.056	*	130/127	0.784	174	[1.050]		131/127	1.031	174	[1.083]		129/128	0.63	174	[1.043]		130/128	0.708
139	gi|3342404	lactate dehydrogenase H subunit [Gallus gallus]	3824	42652	187	157	23	22	55.3	7.07	25.72	Quantitation summary for protein	129/126	0.709	170	[1.090]		130/126	0.767	170	[1.111]		131/126	0.921	168	[1.174]		129/127	0.806	170	[1.115]		130/127	0.878	170	[1.080]		131/127	1.053	168	[1.135]		129/128	0.471	170	[1.082]		130/128	0.506
140	gi|53136806	hypothetical protein RCJMB04_34c21 [Gallus gallus]	3814	64847	165	136	34	30	55.4	5.02	8.73	Quantitation summary for protein	129/126	1.044	147	[1.043]		130/126	1.02	146	[1.077]		131/126	1.372	147	[1.164]		129/127	1.039	147	[1.076]		130/127	1.021	146	[1.044]		131/127	1.377	147	[1.134]		129/128	1.193	147	[1.023]		130/128	1.158
141	gi|53136145	hypothetical protein RCJMB04_27c17 [Gallus gallus]	3813	83851	164	137	36	31	54.8	8.93	5.81	Quantitation summary for protein	129/126	0.804	135	1.042	*	130/126	1.048	135	1.038	*	131/126	0.897	135	[1.072]		129/127	0.792	135	1.047	*	130/127	1.041	135	1.03	*	131/127	0.893	136	[1.062]		129/128	0.724	135	[1.037]		130/128	0.939
142	gi|196049779	Chain E, Chicken Cytochrome Bc1 Complex Inhibited By An Iodinated Analogue Of The Polyketide Crocacin-d	3809	24501	95	94	10	10	44.4	6.07	15.62	Quantitation summary for protein	129/126	1.03	9	1.07		130/126	1.071	9	1.046	*	131/126	1.207	9	1.126	*	129/127	0.979	9	1.059		130/127	1.024	9	1.032		131/127	1.157	9	1.113	*	129/128	0.959	9	1.036	*	130/128	0.99
143	gi|5851949	ATP-citrate lyase [Gallus gallus]	3805	21334	121	112	11	11	76.5	9.16	68.52	Quantitation summary for protein	129/126	0.971	7	1.048		130/126	0.979	6	1.029		131/126	0.636	7	1.09	*	129/127	0.844	7	1.07	*	130/127	0.825	7	1.056	*	131/127	0.558	7	1.096	*	129/128	0.992	7	[1.065]		130/128	0.957
144	gi|53130266	hypothetical protein RCJMB04_6k20 [Gallus gallus]	3787	62056	188	143	29	27	61.5	9.2	17.02	Quantitation summary for protein	129/126	0.974	160	[1.066]		130/126	1.083	162	[1.082]		131/126	1.519	162	[1.141]		129/127	0.765	160	[1.085]		130/127	0.856	160	[1.063]		131/127	1.204	160	[1.119]		129/128	1.006	159	[1.047]		130/128	1.112
145	gi|135469	RecName: Full=Tubulin beta-5 chain; AltName: Full=Beta-tubulin class-V	3732	54062	178	152	17	15	42.4	4.79	11.72	Quantitation summary for protein	129/126	1.084	31	[1.086]		130/126	1.089	31	1.041	*	131/126	1.569	31	[1.132]		129/127	1.108	31	1.091	*	130/127	1.121	31	1.045	*	131/127	1.619	31	[1.132]		129/128	1.027	30	1.029	*	130/128	1.023
146	gi|118099965	PREDICTED: ATP synthase subunit d, mitochondrial isoform 1 [Gallus gallus]	3731	21998	120	114	14	12	83.9	8.73	60.45	Quantitation summary for protein	129/126	0.821	119	1.077	*	130/126	1.09	119	[1.129]		131/126	1.508	119	[1.190]		129/127	0.687	119	[1.100]		130/127	0.919	119	[1.103]		131/127	1.274	119	[1.159]		129/128	0.809	119	[1.063]		130/128	1.067
147	gi|443542	Chain A, X-Ray Structure Refinement And Comparison Of Three Forms Of Mitochondrial Aspartate Aminotransferase	3702	51834	231	165	31	28	68.8	9.13	39.35	Quantitation summary for protein	129/126	0.902	186	[1.071]		130/126	0.963	186	[1.096]		131/126	1.096	186	[1.187]		129/127	0.743	186	1.1	*	130/127	0.799	186	1.056	*	131/127	0.911	186	[1.149]		129/128	0.829	187	[1.037]		130/128	0.879
148	gi|53131091	hypothetical protein RCJMB04_11d4 [Gallus gallus]	3701	116432	165	136	41	35	45.8	5.68	4.57	Quantitation summary for protein	129/126	1.247	154	[1.049]		130/126	1.088	154	[1.064]		131/126	0.951	154	[1.100]		129/127	1.186	154	[1.066]		130/127	1.042	154	[1.050]		131/127	0.913	154	[1.086]		129/128	1.171	154	[1.031]		130/128	1.015
149	gi|118097631	PREDICTED: heat shock 70 kDa protein 4 isoform 2 [Gallus gallus]	3646	114515	150	133	44	38	59.2	5.26	3.57	Quantitation summary for protein	129/126	1.194	136	[1.041]		130/126	0.89	136	[1.042]		131/126	0.798	135	[1.082]		129/127	1.301	136	[1.063]		130/127	0.976	136	[1.028]		131/127	0.876	135	[1.060]		129/128	1.153	136	[1.025]		130/128	0.854
150	gi|304423	sterol carrier protein-2, partial [Gallus gallus]	3638	69993	202	174	31	28	48.4	8.49	12.01	Quantitation summary for protein	129/126	0.95	3	1.087		130/126	1.004	3	1.045		131/126	1.109	3	1.125		129/127	0.827	3	1.127		130/127	0.88	3	1.079		131/127	0.974	3	1.148		129/128	0.518	3	1.272	*	130/128	0.544
151	gi|363736265	PREDICTED: tubulin alpha-5 chain-like [Gallus gallus]	3606	56335	161	129	20	19	52.4	4.95	12.59	Quantitation summary for protein	129/126	---	0	---		130/126	---	0	---		131/126	---	0	---		129/127	---	0	---		130/127	---	0	---		131/127	---	0	---		129/128	---	0	---		130/128	---
152	gi|3980064	formiminotransferase cyclodeaminase [Gallus gallus]	3596	67305	146	130	34	28	58	5.87	9.34	Quantitation summary for protein	129/126	1.505	134	1.035	*	130/126	1.16	135	[1.063]		131/126	1.41	135	[1.086]		129/127	1.307	135	[1.048]		130/127	1.014	135	[1.051]		131/127	1.236	135	[1.073]		129/128	1.292	136	[1.022]		130/128	0.989
153	gi|363734519	PREDICTED: methylmalonate-semialdehyde dehydrogenase [acylating], mitochondrial [Gallus gallus]	3594	69223	139	121	24	21	50.4	6.33	6.68	Quantitation summary for protein	129/126	1.193	130	1.052	*	130/126	1.08	130	1.07	*	131/126	1.118	130	[1.110]		129/127	0.965	130	[1.078]		130/127	0.879	130	[1.052]		131/127	0.912	130	[1.089]		129/128	1.089	130	1.044	*	130/128	0.979
154	gi|363736639	PREDICTED: non-specific lipid-transfer protein, partial [Gallus gallus]	3587	70008	201	173	31	28	47.8	8.56	11.43	Quantitation summary for protein	129/126	0.5	2	1.014	*	130/126	0.808	2	1.027		131/126	0.7	2	1.07		129/127	0.404	2	1.03	*	130/127	0.657	2	1.072		131/127	0.571	2	1.025	*	129/128	0.494	2	1.045	*	130/128	0.794
155	gi|118099923	PREDICTED: acyl-CoA synthetase family member 2, mitochondrial [Gallus gallus]	3579	74297	125	106	26	22	49.9	8.36	3.95	Quantitation summary for protein	129/126	1.044	108	1.043	*	130/126	0.947	110	1.059	*	131/126	0.716	109	1.114	*	129/127	1.126	109	[1.072]		130/127	1.028	110	1.052	*	131/127	0.78	110	[1.096]		129/128	0.926	108	[1.067]		130/128	0.835
156	gi|50745166	PREDICTED: trifunctional enzyme subunit beta, mitochondrial [Gallus gallus]	3548	58665	137	127	22	21	45.8	9.37	7.38	Quantitation summary for protein	129/126	0.666	129	[1.057]		130/126	0.818	129	[1.089]		131/126	0.795	129	[1.165]		129/127	0.615	131	[1.066]		130/127	0.762	130	[1.066]		131/127	0.745	131	[1.144]		129/128	0.669	131	[1.042]		130/128	0.818
157	gi|50755288	PREDICTED: betaine--homocysteine S-methyltransferase 1 [Gallus gallus]	3518	53573	148	120	21	18	56.3	7.56	6.15	Quantitation summary for protein	129/126	1.503	133	[1.076]		130/126	0.882	133	[1.106]		131/126	1.813	133	[1.187]		129/127	1.592	133	[1.111]		130/127	0.94	133	[1.097]		131/127	1.938	133	[1.170]		129/128	0.667	133	1.046	*	130/128	0.389
158	gi|507880	xanthine dehydrogenase [Gallus gallus]	3487	171677	157	131	46	40	38.6	6.87	2.4	Quantitation summary for protein	129/126	1.191	141	1.034	*	130/126	1	141	[1.048]		131/126	1.196	141	[1.074]		129/127	1.199	141	[1.051]		130/127	1.014	141	[1.031]		131/127	1.215	141	[1.055]		129/128	1.138	140	[1.024]		130/128	0.95
159	gi|197320840	beta-actin [Gallus gallus]	3470	11673	175	151	10	8	67	6.17	175.4	Quantitation summary for protein	129/126	---	0	---		130/126	---	0	---		131/126	---	0	---		129/127	---	0	---		130/127	---	0	---		131/127	---	0	---		129/128	---	0	---		130/128	---
160	gi|53131390	hypothetical protein RCJMB04_11l21 [Gallus gallus]	3458	32741	117	104	18	17	64.1	4.73	20.99	Quantitation summary for protein	129/126	0.865	73	[1.082]		130/126	1.019	73	[1.148]		131/126	1.169	72	[1.286]		129/127	0.879	73	[1.102]		130/127	1.043	73	[1.113]		131/127	1.198	72	[1.259]		129/128	0.937	73	[1.053]		130/128	1.097
161	gi|60098729	hypothetical protein RCJMB04_7d7 [Gallus gallus]	3448	64479	136	112	28	23	57.5	6.99	7.48	Quantitation summary for protein	129/126	0.79	124	[1.032]		130/126	0.954	124	[1.034]		131/126	1.065	124	[1.047]		129/127	0.725	124	[1.047]		130/127	0.881	124	[1.031]		131/127	0.986	124	[1.045]		129/128	0.657	124	[1.034]		130/128	0.788
162	gi|50745031	PREDICTED: protein disulfide-isomerase A6 isoform 2 [Gallus gallus]	3447	56719	121	109	20	18	40	5.02	6.2	Quantitation summary for protein	129/126	1.74	114	[1.113]		130/126	0.999	114	[1.165]		131/126	1.275	114	[1.355]		129/127	1.844	114	[1.180]		130/127	1.067	114	[1.132]		131/127	1.364	114	[1.303]		129/128	1.67	114	[1.065]		130/128	0.953
163	gi|608483	kinectin [Gallus gallus]	3407	196440	180	141	57	50	43.6	5.72	1.69	Quantitation summary for protein	129/126	1.106	154	[1.037]		130/126	0.923	154	[1.033]		131/126	0.74	153	[1.056]		129/127	1.196	154	[1.047]		130/127	1.004	154	[1.025]		131/127	0.806	153	[1.048]		129/128	1.047	154	[1.027]		130/128	0.868
164	gi|363744581	PREDICTED: phosphoserine aminotransferase [Gallus gallus]	3404	47507	150	122	25	21	62.2	8.81	15.77	Quantitation summary for protein	129/126	1.077	134	[1.028]		130/126	1.056	135	1.032	*	131/126	1.119	135	[1.055]		129/127	0.924	134	[1.047]		130/127	0.913	135	[1.033]		131/127	0.969	135	[1.057]		129/128	1.022	133	[1.018]		130/128	0.996
165	gi|363744134	PREDICTED: NAD(P) transhydrogenase, mitochondrial [Gallus gallus]	3400	128082	145	120	37	33	34.1	6.97	3.1	Quantitation summary for protein	129/126	0.999	134	[1.049]		130/126	1.253	134	[1.111]		131/126	0.774	134	[1.167]		129/127	1.049	134	[1.055]		130/127	1.325	134	[1.071]		131/127	0.82	134	[1.125]		129/128	0.838	134	[1.027]		130/128	1.045
166	gi|53127216	hypothetical protein RCJMB04_1j22 [Gallus gallus]	3396	67383	185	151	33	30	62.5	8.09	16.39	Quantitation summary for protein	129/126	0.762	163	1.048	*	130/126	0.98	164	[1.093]		131/126	1.163	165	[1.177]		129/127	0.675	163	[1.061]		130/127	0.875	163	[1.072]		131/127	1.041	164	[1.159]		129/128	0.541	163	[1.056]		130/128	0.691
167	gi|363728718	PREDICTED: ATP synthase subunit O, mitochondrial isoform 2 [Gallus gallus]	3375	29191	136	110	15	14	62.5	9.85	47.77	Quantitation summary for protein	129/126	0.778	116	[1.049]		130/126	1.168	117	1.036	*	131/126	1.396	117	[1.065]		129/127	0.609	116	[1.061]		130/127	0.921	117	[1.036]		131/127	1.104	117	[1.061]		129/128	0.827	115	[1.042]		130/128	1.234
168	gi|63711	unnamed protein product [Gallus gallus]	3356	96964	150	127	34	31	39.5	4.9	4.62	Quantitation summary for protein	129/126	0.964	142	[1.035]		130/126	1.001	142	[1.058]		131/126	0.993	142	[1.115]		129/127	0.947	142	[1.048]		130/127	0.99	142	[1.038]		131/127	0.985	142	[1.096]		129/128	1.051	142	[1.022]		130/128	1.084
169	gi|16660153	transcriptional coactivator p100 [Gallus gallus]	3346	89386	108	99	29	27	45.5	6.03	3.07	Quantitation summary for protein	129/126	1.179	102	[1.046]		130/126	1.111	102	[1.047]		131/126	0.965	102	1.057	*	129/127	1.097	102	[1.037]		130/127	1.041	102	1.034	*	131/127	0.906	102	[1.049]		129/128	1.169	102	[1.028]		130/128	1.094
170	gi|60099199	hypothetical protein RCJMB04_34d13 [Gallus gallus]	3335	158623	140	116	42	35	35.9	7.53	1.5	Quantitation summary for protein	129/126	1.236	124	[1.033]		130/126	0.888	124	[1.053]		131/126	0.587	124	[1.088]		129/127	1.527	124	[1.046]		130/127	1.105	124	[1.042]		131/127	0.732	124	[1.069]		129/128	1.232	123	1.02	*	130/128	0.88
171	gi|60099043	hypothetical protein RCJMB04_21b18 [Gallus gallus]	3320	38982	125	114	8	8	29.5	6.6	3	Quantitation summary for protein	129/126	0.93	107	[1.052]		130/126	1.065	106	[1.068]		131/126	1.272	106	[1.082]		129/127	0.995	107	[1.082]		130/127	1.147	107	[1.053]		131/127	1.373	107	[1.061]		129/128	0.992	108	[1.050]		130/128	1.129
172	gi|47059981	phenylalanine hydroxylase [Gallus gallus]	3312	59077	134	116	27	20	54.5	6.49	9.29	Quantitation summary for protein	129/126	0.83	122	[1.084]		130/126	0.822	122	[1.089]		131/126	0.646	122	[1.180]		129/127	0.961	122	[1.104]		130/127	0.958	122	[1.072]		131/127	0.755	122	[1.164]		129/128	0.556	122	[1.055]		130/128	0.547
173	gi|76443696	voltage-dependent anion-selective channel protein 1 [Gallus gallus]	3297	36474	90	84	16	14	71	6.85	7.04	Quantitation summary for protein	129/126	0.882	86	[1.040]		130/126	1.158	86	[1.053]		131/126	1.6	86	[1.081]		129/127	0.809	86	[1.048]		130/127	1.07	86	1.035	*	131/127	1.482	86	[1.062]		129/128	0.948	86	1.025	*	130/128	1.236
174	gi|363744224	PREDICTED: dimethylglycine dehydrogenase, mitochondrial [Gallus gallus]	3284	110436	106	99	24	23	37.1	7.33	1.47	Quantitation summary for protein	129/126	1.054	99	1.028	*	130/126	1.005	99	1.035		131/126	1.168	99	[1.054]		129/127	0.95	99	[1.039]		130/127	0.912	99	1.03	*	131/127	1.063	99	[1.048]		129/128	0.876	99	[1.022]		130/128	0.829
175	gi|118095485	PREDICTED: sorting nexin-1 [Gallus gallus]	3269	68024	87	81	19	17	38.9	5.32	2.1	Quantitation summary for protein	129/126	0.821	82	[1.025]		130/126	0.799	82	1.032	*	131/126	0.87	82	[1.060]		129/127	0.939	82	[1.026]		130/127	0.921	82	1.02	*	131/127	1.004	82	[1.045]		129/128	0.923	82	1.021	*	130/128	0.892
176	gi|118098353	PREDICTED: clathrin heavy chain 1 [Gallus gallus]	3265	214434	128	114	32	28	20.3	5.54	1	Quantitation summary for protein	129/126	1.243	20	1.056	*	130/126	0.96	20	1.086	*	131/126	0.571	20	1.153	*	129/127	1.489	20	[1.119]		130/127	1.159	20	1.067	*	131/127	0.69	20	[1.119]		129/128	1.175	20	1.041	*	130/128	0.902
177	gi|211095	adynylosuccinate lyase [Gallus gallus]	3259	58568	120	101	27	24	57.3	6.9	9.47	Quantitation summary for protein	129/126	1.755	110	[1.048]		130/126	0.821	110	[1.072]		131/126	0.544	110	1.118	*	129/127	1.884	110	[1.076]		130/127	0.887	110	1.042	*	131/127	0.589	110	[1.097]		129/128	1.21	110	1.021	*	130/128	0.562
178	gi|517085	alpha-actinin [Gallus gallus]	3221	117087	123	105	35	32	44.5	5.13	2.27	Quantitation summary for protein	129/126	0.822	84	1.029	*	130/126	1.304	84	[1.054]		131/126	0.928	83	[1.073]		129/127	0.975	84	[1.037]		130/127	1.559	84	[1.035]		131/127	1.109	83	[1.057]		129/128	0.728	84	[1.028]		130/128	1.148
179	gi|53133814	hypothetical protein RCJMB04_20j17 [Gallus gallus]	3185	90005	137	123	33	30	45.2	6.5	4	Quantitation summary for protein	129/126	0.888	130	[1.031]		130/126	1.074	130	[1.044]		131/126	0.912	130	[1.083]		129/127	0.785	130	1.033	*	130/127	0.956	130	[1.042]		131/127	0.814	130	[1.083]		129/128	0.788	130	[1.036]		130/128	0.947
180	gi|471434827	chromosome 1 open reading frame, human C11orf54 [Gallus gallus]	3168	41072	116	100	19	16	73.4	6.16	16.55	Quantitation summary for protein	129/126	0.636	105	[1.085]		130/126	0.954	105	[1.102]		131/126	1.143	105	[1.182]		129/127	0.582	105	[1.139]		130/127	0.879	105	[1.093]		131/127	1.056	105	[1.142]		129/128	0.739	105	[1.094]		130/128	1.102
181	gi|348167222	beta-actin [Gallus gallus]	3162	17664	77	65	5	3	40.7	5.04	3.84	Quantitation summary for protein	129/126	---	0	---		130/126	---	0	---		131/126	---	0	---		129/127	---	0	---		130/127	---	0	---		131/127	---	0	---		129/128	---	0	---		130/128	---
182	gi|53136744	hypothetical protein RCJMB04_33e1 [Gallus gallus]	3148	79928	148	114	33	25	52.9	6.56	4.41	Quantitation summary for protein	129/126	1.285	125	[1.044]		130/126	0.916	125	[1.072]		131/126	0.756	125	[1.110]		129/127	1.462	125	[1.064]		130/127	1.049	125	[1.050]		131/127	0.868	125	[1.084]		129/128	1.283	125	[1.031]		130/128	0.909
183	gi|126751	RecName: Full=Myristoylated alanine-rich C-kinase substrate; Short=MARCKS	3132	34129	88	83	18	18	77.2	4.48	11.29	Quantitation summary for protein	129/126	0.664	78	[1.142]		130/126	0.67	78	1.079	*	131/126	0.622	78	[1.164]		129/127	1.002	79	[1.185]		130/127	1.021	78	[1.067]		131/127	0.959	78	[1.125]		129/128	1.105	79	[1.059]		130/128	1.104
184	gi|60098911	hypothetical protein RCJMB04_15d24 [Gallus gallus]	3116	112852	130	108	41	35	54.2	5.28	2.83	Quantitation summary for protein	129/126	1.07	116	[1.020]		130/126	0.831	116	[1.034]		131/126	0.778	116	[1.063]		129/127	1.254	116	[1.028]		130/127	0.981	116	[1.025]		131/127	0.92	116	[1.052]		129/128	1.106	116	[1.018]		130/128	0.854
185	gi|50752600	PREDICTED: tubulin alpha-3 chain [Gallus gallus]	3116	55295	137	110	18	16	45.3	4.94	8.55	Quantitation summary for protein	129/126	---	0	---		130/126	---	0	---		131/126	---	0	---		129/127	---	0	---		130/127	---	0	---		131/127	---	0	---		129/128	---	0	---		130/128	---
186	gi|53130454	hypothetical protein RCJMB04_7p8 [Gallus gallus]	3055	55610	137	127	29	27	58.3	6.49	10.19	Quantitation summary for protein	129/126	0.841	126	[1.075]		130/126	1.044	126	[1.086]		131/126	1.103	126	[1.144]		129/127	0.68	126	[1.122]		130/127	0.849	126	[1.047]		131/127	0.9	126	[1.100]		129/128	0.906	126	[1.034]		130/128	1.116
187	gi|363743079	PREDICTED: ATP synthase subunit b, mitochondrial [Gallus gallus]	3051	34198	128	105	17	15	42.4	9.23	18.37	Quantitation summary for protein	129/126	0.854	105	[1.056]		130/126	1.125	104	[1.075]		131/126	0.973	104	[1.130]		129/127	0.782	106	[1.069]		130/127	1.038	106	[1.052]		131/127	0.9	106	[1.107]		129/128	0.799	106	[1.031]		130/128	1.046
188	gi|259835	prepro-cathepsin D [Gallus gallus]	3027	49685	134	116	18	18	43.7	5.9	9.75	Quantitation summary for protein	129/126	0.811	127	[1.065]		130/126	1.172	126	[1.075]		131/126	1.758	127	[1.167]		129/127	0.701	127	[1.080]		130/127	1.019	126	[1.049]		131/127	1.533	127	[1.144]		129/128	0.729	127	1.033	*	130/128	1.047
189	gi|260103640	cyclophilin A [Gallus gallus]	3024	21063	166	127	14	14	69.1	8.29	175.06	Quantitation summary for protein	129/126	1.08	136	1.101	*	130/126	0.986	135	1.176		131/126	1.096	135	[1.285]		129/127	1.069	135	[1.188]		130/127	0.982	134	[1.104]		131/127	1.094	134	1.205	*	129/128	0.945	136	[1.048]		130/128	0.857
190	gi|363731790	PREDICTED: leucine-rich PPR motif-containing protein, mitochondrial [Gallus gallus]	3023	180560	153	131	49	44	35.8	6.68	2.04	Quantitation summary for protein	129/126	1.125	143	[1.028]		130/126	1.266	143	[1.040]		131/126	0.799	143	1.068	*	129/127	1.054	143	[1.043]		130/127	1.194	143	[1.030]		131/127	0.756	143	1.052	*	129/128	0.984	143	[1.022]		130/128	1.1
191	gi|53127382	hypothetical protein RCJMB04_2b5 [Gallus gallus]	3021	70910	116	94	28	24	58.8	5.66	4.1	Quantitation summary for protein	129/126	1.1	99	[1.044]		130/126	1.037	99	[1.052]		131/126	1.139	99	[1.075]		129/127	0.978	99	[1.061]		130/127	0.928	99	[1.040]		131/127	1.022	99	[1.064]		129/128	1.109	99	1.027	*	130/128	1.039
192	gi|60098555	hypothetical protein RCJMB04_3l20 [Gallus gallus]	3015	50541	139	123	24	22	55.4	8.19	16.2	Quantitation summary for protein	129/126	0.84	128	[1.103]		130/126	1.253	129	[1.104]		131/126	1.239	130	[1.189]		129/127	0.583	128	[1.168]		130/127	0.874	129	[1.061]		131/127	0.866	130	[1.158]		129/128	1.005	128	[1.035]		130/128	1.501
193	gi|21435808	translational eukaryotic inititation factor 4AII [Gallus gallus]	3005	51841	144	119	22	20	51.8	5.33	12.31	Quantitation summary for protein	129/126	0.939	122	[1.067]		130/126	0.858	122	1.088	*	131/126	0.851	122	[1.152]		129/127	0.902	122	[1.100]		130/127	0.83	122	1.064	*	131/127	0.825	122	[1.124]		129/128	1.081	122	[1.040]		130/128	0.982
194	gi|8670805	T-complex protein 1 delta subunit [Gallus gallus]	2996	67667	104	90	26	22	59.1	7.94	5.05	Quantitation summary for protein	129/126	1.152	96	[1.045]		130/126	1.071	96	[1.077]		131/126	1.196	96	[1.142]		129/127	1.03	97	[1.076]		130/127	0.964	96	[1.050]		131/127	1.08	97	[1.112]		129/128	1.114	96	[1.033]		130/128	1.029
195	gi|363737146	PREDICTED: UDP-glucose:glycoprotein glucosyltransferase 1 [Gallus gallus]	2976	198409	114	105	36	32	31.2	5.32	1.08	Quantitation summary for protein	129/126	1.044	110	[1.026]		130/126	0.897	109	[1.037]		131/126	0.958	110	[1.059]		129/127	0.958	109	[1.026]		130/127	0.829	109	[1.039]		131/127	0.887	109	[1.061]		129/128	1.137	110	1.025	*	130/128	0.972
196	gi|53127794	hypothetical protein RCJMB04_3g13 [Gallus gallus]	2974	71455	153	131	30	25	50.8	6.17	5.3	Quantitation summary for protein	129/126	0.839	131	[1.032]		130/126	0.986	131	1.03	*	131/126	1.105	131	[1.052]		129/127	0.753	131	[1.043]		130/127	0.891	131	1.026	*	131/127	1.001	131	[1.047]		129/128	0.887	131	1.021	*	130/128	1.036
197	gi|8163560	vacuolar H-ATPase B subunit osteoclast isozyme, partial [Gallus gallus]	2964	60399	92	85	17	16	44.2	5.5	3.41	Quantitation summary for protein	129/126	1.119	91	1.028	*	130/126	0.92	91	[1.044]		131/126	1.034	92	[1.055]		129/127	1.123	91	[1.037]		130/127	0.929	91	1.033	*	131/127	1.047	92	[1.046]		129/128	1.099	91	[1.026]		130/128	0.897
198	gi|53135802	hypothetical protein RCJMB04_25o1 [Gallus gallus]	2944	43274	146	110	21	19	64.7	8.77	26.37	Quantitation summary for protein	129/126	0.771	120	[1.065]		130/126	0.999	120	[1.067]		131/126	1.397	120	[1.117]		129/127	0.645	120	[1.081]		130/127	0.842	120	[1.049]		131/127	1.18	120	[1.099]		129/128	0.766	120	1.027	*	130/128	0.987
199	gi|53133756	hypothetical protein RCJMB04_20b9 [Gallus gallus]	2940	218646	162	134	54	45	33	7.86	1.47	Quantitation summary for protein	129/126	1.248	139	[1.037]		130/126	1.087	139	[1.050]		131/126	0.754	138	[1.060]		129/127	1.311	139	[1.050]		130/127	1.15	139	[1.042]		131/127	0.799	138	[1.045]		129/128	1.184	139	[1.019]		130/128	1.024
200	gi|118098350	PREDICTED: cytochrome b-c1 complex subunit 2, mitochondrial-like [Gallus gallus]	2924	55194	109	95	23	19	51.4	9.04	7.06	Quantitation summary for protein	129/126	0.861	102	[1.065]		130/126	1.064	102	[1.051]		131/126	1.244	102	[1.100]		129/127	0.734	102	[1.084]		130/127	0.913	102	1.042	*	131/127	1.071	102	[1.090]		129/128	0.807	102	[1.037]		130/128	0.991
201	gi|363745438	PREDICTED: puromycin-sensitive aminopeptidase [Gallus gallus]	2915	108581	130	112	35	33	41.7	5.03	2.69	Quantitation summary for protein	129/126	1.067	77	1.042	*	130/126	0.987	76	[1.066]		131/126	0.851	77	[1.087]		129/127	1.205	77	[1.072]		130/127	1.12	76	[1.042]		131/127	0.97	77	1.056	*	129/128	0.996	77	1.025		130/128	0.914
202	gi|3420726	Rab-GDP dissociation inhibitor [Gallus gallus]	2914	58669	119	98	23	22	62.9	5.23	8.35	Quantitation summary for protein	129/126	1.119	106	[1.067]		130/126	0.821	106	[1.088]		131/126	0.628	106	[1.154]		129/127	1.247	106	[1.096]		130/127	0.921	106	[1.075]		131/127	0.706	106	1.126	*	129/128	1.089	105	1.037	*	130/128	0.793
203	gi|50740570	PREDICTED: epoxide hydrolase 1-like [Gallus gallus]	2889	63081	127	102	26	22	49.6	8.96	7.45	Quantitation summary for protein	129/126	0.746	111	1.08	*	130/126	1.298	111	1.09	*	131/126	0.612	111	[1.149]		129/127	0.789	111	[1.103]		130/127	1.397	110	1.071	*	131/127	0.653	111	[1.134]		129/128	0.647	111	1.053	*	130/128	1.118
204	gi|53130694	hypothetical protein RCJMB04_9i11 [Gallus gallus]	2875	92402	127	109	28	27	41.9	8.29	4.15	Quantitation summary for protein	129/126	2.569	115	1.081	*	130/126	1.543	115	[1.073]		131/126	1.023	115	[1.132]		129/127	2.343	114	[1.121]		130/127	1.417	114	[1.080]		131/127	0.941	114	[1.122]		129/128	2.142	115	[1.061]		130/128	1.278
205	gi|363744876	PREDICTED: hydroxysteroid dehydrogenase-like protein 2-like isoform 1 [Gallus gallus]	2861	53084	115	99	23	19	59.1	8.5	6.75	Quantitation summary for protein	129/126	1.146	105	1.035	*	130/126	1.219	106	1.042	*	131/126	1.169	106	[1.082]		129/127	0.906	106	[1.057]		130/127	0.971	106	[1.035]		131/127	0.933	106	[1.080]		129/128	0.921	106	[1.016]		130/128	0.974
206	gi|50732309	PREDICTED: kinesin-1 heavy chain [Gallus gallus]	2861	133560	110	98	32	28	36.5	6.06	1.39	Quantitation summary for protein	129/126	1.093	71	[1.028]		130/126	1.047	71	[1.036]		131/126	0.777	71	1.042	*	129/127	1.129	71	[1.041]		130/127	1.088	71	1.024	*	131/127	0.81	71	[1.034]		129/128	1.146	71	[1.024]		130/128	1.091
207	gi|363740107	PREDICTED: AP-1 complex subunit beta-1 [Gallus gallus]	2860	119735	101	88	31	27	35.4	4.93	2.1	Quantitation summary for protein	129/126	1.058	53	[1.059]		130/126	0.988	53	[1.076]		131/126	0.876	51	[1.114]		129/127	1.089	54	[1.099]		130/127	1.022	52	1.033	*	131/127	0.91	52	[1.071]		129/128	1.069	52	1.026	*	130/128	0.991
208	gi|304388	glutathione S-transferase [Gallus gallus]	2854	30782	163	115	17	14	63.3	8.86	48.49	Quantitation summary for protein	129/126	0.837	99	1.047	*	130/126	0.652	99	[1.069]		131/126	0.715	99	1.126	*	129/127	1.058	99	1.052	*	130/127	0.829	99	1.039	*	131/127	0.912	99	[1.092]		129/128	0.786	99	1.03	*	130/128	0.608
209	gi|53127458	hypothetical protein RCJMB04_2i3 [Gallus gallus]	2847	32633	109	95	18	17	62.4	4.68	19.16	Quantitation summary for protein	129/126	1.212	62	[1.039]		130/126	0.971	62	[1.080]		131/126	0.86	60	[1.164]		129/127	1.443	62	[1.069]		130/127	1.164	62	1.054	*	131/127	1.029	60	[1.139]		129/128	1.199	62	1.034	*	130/128	0.955
210	gi|4416524	class-alpha glutathione S-transferase [Gallus gallus]	2846	30725	133	98	17	12	55	8.76	39.3	Quantitation summary for protein	129/126	1.441	111	[1.079]		130/126	0.968	111	[1.177]		131/126	1.116	110	[1.306]		129/127	1.373	111	[1.121]		130/127	0.929	111	[1.100]		131/127	1.071	110	1.228	*	129/128	1.521	111	1.067	*	130/128	1.015
211	gi|53136550	hypothetical protein RCJMB04_30j1 [Gallus gallus]	2818	83209	109	99	25	23	43.6	5.51	3.51	Quantitation summary for protein	129/126	1.226	91	[1.046]		130/126	0.973	90	[1.048]		131/126	0.581	90	[1.085]		129/127	1.454	91	[1.065]		130/127	1.163	90	1.039	*	131/127	0.696	90	[1.071]		129/128	1.086	91	1.023	*	130/128	0.857
212	gi|53136762	hypothetical protein RCJMB04_33h20 [Gallus gallus]	2817	38970	91	76	13	10	45.6	7.72	5.01	Quantitation summary for protein	129/126	0.901	84	[1.079]		130/126	1.131	85	1.066	*	131/126	1.302	85	[1.098]		129/127	0.769	84	1.094	*	130/127	0.973	85	1.058	*	131/127	1.123	85	[1.097]		129/128	0.996	83	[1.065]		130/128	1.246
213	gi|50729254	PREDICTED: 2-amino-3-ketobutyrate coenzyme A ligase, mitochondrial [Gallus gallus]	2817	50266	87	80	15	14	40.8	8.51	4.55	Quantitation summary for protein	129/126	1.098	83	[1.055]		130/126	1.172	83	1.052	*	131/126	1.04	83	[1.123]		129/127	0.908	83	[1.066]		130/127	0.977	83	[1.042]		131/127	0.869	83	[1.127]		129/128	0.87	83	[1.043]		130/128	0.922
214	gi|118102310	PREDICTED: tubulin alpha-1C chain [Gallus gallus]	2812	55293	105	88	17	15	47.3	5.01	6.57	Quantitation summary for protein	129/126	1.109	8	1.049	*	130/126	0.738	8	1.131	*	131/126	0.623	8	1.247	*	129/127	1.329	8	1.076	*	130/127	0.88	7	1.055	*	131/127	0.754	8	1.198	*	129/128	1.216	8	1.071	*	130/128	0.805
215	gi|13434994	PIT 54 [Gallus gallus]	2810	57254	78	76	13	13	42.3	4.61	3.04	Quantitation summary for protein	129/126	1.447	78	1.037	*	130/126	0.993	78	[1.034]		131/126	1.41	78	1.053	*	129/127	1.443	78	[1.043]		130/127	0.998	78	[1.030]		131/127	1.42	78	[1.048]		129/128	1.616	78	[1.038]		130/128	1.102
216	gi|53127314	hypothetical protein RCJMB04_1m12 [Gallus gallus]	2804	55016	107	91	16	15	46.3	9.13	3.53	Quantitation summary for protein	129/126	0.956	98	[1.048]		130/126	1.066	98	[1.049]		131/126	0.752	98	[1.067]		129/127	0.99	98	[1.064]		130/127	1.111	98	1.035	*	131/127	0.786	98	1.052	*	129/128	1.049	99	1.025	*	130/128	1.162
217	gi|114372	RecName: Full=Sodium/potassium-transporting ATPase subunit alpha-1; Short=Na(+)/K(+) ATPase alpha-1 subunit; AltName: Full=Sodium pump subunit alpha-1; Flags: Precursor	2793	126361	93	88	22	22	29.2	5.5	1.45	Quantitation summary for protein	129/126	1.1	50	[1.037]		130/126	1.079	50	1.038	*	131/126	0.764	50	[1.063]		129/127	1.304	50	1.048	*	130/127	1.288	50	1.041	*	131/127	0.907	49	1.043	*	129/128	1.032	50	1.028	*	130/128	1.005
218	gi|363738106	PREDICTED: uncharacterized oxidoreductase C663.09c-like [Gallus gallus]	2777	30938	82	74	10	10	45.6	8.2	9.43	Quantitation summary for protein	129/126	0.932	19	1.058	*	130/126	1.039	19	1.054	*	131/126	0.788	19	1.123	*	129/127	0.72	19	1.072	*	130/127	0.809	19	1.056	*	131/127	0.615	19	1.141	*	129/128	0.701	19	1.045	*	130/128	0.777
219	gi|53127808	hypothetical protein RCJMB04_3h19 [Gallus gallus]	2777	82336	127	97	28	24	51.7	6.93	5.26	Quantitation summary for protein	129/126	0.945	108	1.048	*	130/126	1.028	108	[1.068]		131/126	1.313	109	[1.117]		129/127	0.851	108	[1.063]		130/127	0.931	108	[1.061]		131/127	1.193	109	[1.104]		129/128	0.669	108	1.055	*	130/128	0.722
220	gi|21780320	CAP23 [Gallus gallus]	2773	33902	103	86	21	18	70.9	4.66	15.53	Quantitation summary for protein	129/126	0.966	95	[1.083]		130/126	0.649	94	[1.069]		131/126	0.555	93	[1.130]		129/127	1.411	95	[1.115]		130/127	0.955	94	[1.051]		131/127	0.817	93	[1.093]		129/128	0.994	95	[1.039]		130/128	0.664
221	gi|63778	ribosomal protein L7a [Gallus gallus]	2752	39376	101	94	14	12	39.5	10.51	4.02	Quantitation summary for protein	129/126	1.073	99	[1.066]		130/126	0.91	99	[1.082]		131/126	1.308	99	1.122	*	129/127	1.069	99	[1.097]		130/127	0.913	99	[1.050]		131/127	1.315	99	1.091	*	129/128	1.106	99	[1.041]		130/128	0.932
222	gi|363740157	PREDICTED: translational activator GCN1 [Gallus gallus]	2745	344739	104	94	34	30	16.1	7.38	0.53	Quantitation summary for protein	129/126	1.447	100	[1.068]		130/126	0.905	100	[1.088]		131/126	0.583	100	[1.141]		129/127	1.722	99	[1.110]		130/127	1.083	99	1.09	*	131/127	0.7	99	[1.108]		129/128	0.991	100	[1.061]		130/128	0.615
223	gi|363738636	PREDICTED: dolichyl-diphosphooligosaccharide--protein glycosyltransferase subunit 1, partial [Gallus gallus]	2726	71113	120	101	24	19	42.9	6.42	2.87	Quantitation summary for protein	129/126	1.369	104	1.024	*	130/126	1.169	105	[1.028]		131/126	0.829	105	1.072	*	129/127	1.534	105	[1.039]		130/127	1.319	105	1.028	*	131/127	0.938	105	[1.060]		129/128	1.241	105	[1.018]		130/128	1.053
224	gi|50801766	PREDICTED: uncharacterized protein LOC426548 [Gallus gallus]	2714	53737	113	99	16	13	46.1	4.69	4.96	Quantitation summary for protein	129/126	1.213	95	[1.081]		130/126	0.594	83	[1.109]		131/126	0.351	62	1.173	*	129/127	2.232	80	[1.141]		130/127	1.101	71	[1.072]		131/127	0.65	56	1.117	*	129/128	1.206	94	[1.064]		130/128	0.582
225	gi|363729456	PREDICTED: uncharacterized protein KIAA0564-like [Gallus gallus]	2714	239076	135	117	46	38	25.2	6.64	0.94	Quantitation summary for protein	129/126	1.187	121	[1.032]		130/126	1.186	121	[1.033]		131/126	0.916	121	[1.056]		129/127	1.036	121	[1.045]		130/127	1.043	121	[1.031]		131/127	0.807	121	1.052	*	129/128	1.117	122	1.023	*	130/128	1.109
226	gi|63066	unnamed protein product [Gallus gallus]	2709	51176	129	108	27	24	61.4	8.22	13.64	Quantitation summary for protein	129/126	1.069	115	[1.062]		130/126	1.011	115	[1.081]		131/126	1.313	115	[1.163]		129/127	0.911	115	1.087	*	130/127	0.868	115	[1.069]		131/127	1.129	115	[1.151]		129/128	1.023	115	[1.034]		130/128	0.962
227	gi|85544000	Chain A, Avian Respiratory Complex Ii With Oxaloacetate And Ubiquinone	2707	75056	86	74	16	15	33	6.17	2.04	Quantitation summary for protein	129/126	0.905	80	1.056	*	130/126	0.917	80	[1.077]		131/126	0.788	80	[1.121]		129/127	0.904	80	[1.073]		130/127	0.922	80	1.057	*	131/127	0.795	80	1.097	*	129/128	0.847	80	1.045	*	130/128	0.853
228	gi|50754810	PREDICTED: catenin alpha-1 [Gallus gallus]	2706	117395	114	99	37	29	47.7	5.87	2.26	Quantitation summary for protein	129/126	1.122	79	[1.027]		130/126	1.112	79	[1.037]		131/126	0.889	79	[1.056]		129/127	1.244	79	1.036	*	130/127	1.242	79	1.028	*	131/127	0.995	79	[1.050]		129/128	0.995	79	1.017	*	130/128	0.98
229	gi|53136530	hypothetical protein RCJMB04_30f3 [Gallus gallus]	2687	41081	103	85	18	17	52.9	6.37	10.03	Quantitation summary for protein	129/126	1.034	52	[1.092]		130/126	0.867	52	1.086	*	131/126	0.713	52	[1.197]		129/127	0.805	52	[1.101]		130/127	0.679	52	1.083	*	131/127	0.56	52	[1.197]		129/128	1.128	52	1.046	*	130/128	0.94
230	gi|307775405	NADPH--cytochrome P450 reductase [Gallus gallus]	2660	86715	98	82	28	25	48.5	5.42	4.72	Quantitation summary for protein	129/126	1.324	90	1.056	*	130/126	1.23	90	[1.079]		131/126	1.339	89	[1.112]		129/127	1.178	90	[1.079]		130/127	1.102	90	1.045	*	131/127	1.203	89	[1.073]		129/128	1.244	89	1.038	*	130/128	1.149
231	gi|60098739	hypothetical protein RCJMB04_7j8 [Gallus gallus]	2635	117930	113	93	35	28	41	6.63	2.33	Quantitation summary for protein	129/126	1.037	106	[1.023]		130/126	0.97	106	[1.028]		131/126	0.805	106	[1.058]		129/127	1.181	106	1.036	*	130/127	1.112	106	[1.032]		131/127	0.925	106	[1.049]		129/128	1	106	[1.020]		130/128	0.929
232	gi|732995	pre-fibrinogen alpha subunit [Gallus gallus]	2632	65016	109	87	21	18	36.5	6.82	3.61	Quantitation summary for protein	129/126	1.12	95	[1.127]		130/126	1.463	95	[1.099]		131/126	1.974	95	[1.178]		129/127	0.783	95	[1.193]		130/127	1.029	95	1.044	*	131/127	1.392	95	[1.111]		129/128	1.209	95	[1.057]		130/128	1.569
233	gi|363734014	PREDICTED: bifunctional ATP-dependent dihydroxyacetone kinase/FAD-AMP lyase (cyclizing), partial [Gallus gallus]	2616	32155	71	64	7	6	27.1	8.28	2.95	Quantitation summary for protein	129/126	0.8	67	[1.300]		130/126	0.857	67	[1.132]		131/126	0.651	67	[1.314]		129/127	0.926	67	[1.272]		130/127	0.999	67	[1.134]		131/127	0.76	67	[1.248]		129/128	0.814	67	[1.264]		130/128	0.866
234	gi|363737914	PREDICTED: talin-2 [Gallus gallus]	2616	312829	110	91	46	38	19.9	5.39	0.61	Quantitation summary for protein	129/126	1.123	55	1.033	*	130/126	1.049	55	1.029	*	131/126	0.813	55	1.073	*	129/127	1.235	55	[1.052]		130/127	1.162	55	[1.039]		131/127	0.86	54	1.055	*	129/128	1.085	54	1.025	*	130/128	1.012
235	gi|53133512	hypothetical protein RCJMB04_17g3 [Gallus gallus]	2613	70735	106	95	28	25	53	5.96	3.68	Quantitation summary for protein	129/126	1.171	97	[1.055]		130/126	1.075	97	[1.059]		131/126	1.197	97	[1.116]		129/127	1.036	97	[1.064]		130/127	0.958	97	1.05	*	131/127	1.069	97	[1.108]		129/128	1.111	97	[1.032]		130/128	1.014
236	gi|42627797	TPA: putative ISG12(2) protein [Gallus gallus]	2608	11707	62	59	5	5	72	10.18	16.2	Quantitation summary for protein	129/126	0.112	59	[1.189]		130/126	0.13	57	1.143	*	131/126	0.206	59	1.115	*	129/127	0.751	57	1.075	*	130/127	0.886	56	1.045	*	131/127	1.399	57	1.067	*	129/128	0.258	59	[1.134]		130/128	0.298
237	gi|135472	RecName: Full=Tubulin beta-6 chain; AltName: Full=Beta-tubulin class-VI	2608	53900	136	114	14	12	33.9	4.96	6.5	Quantitation summary for protein	129/126	0.851	20	1.068	*	130/126	1.017	20	1.046		131/126	1.063	20	[1.107]		129/127	0.827	20	1.064	*	130/127	0.996	20	1.039		131/127	1.044	20	1.083	*	129/128	0.953	20	1.048	*	130/128	1.132
238	gi|363736263	PREDICTED: tubulin alpha-4A chain-like [Gallus gallus]	2602	57484	116	93	18	17	48.4	5.09	7.76	Quantitation summary for protein	129/126	1.239	8	1.091	*	130/126	0.828	8	[1.119]		131/126	0.764	8	1.211	*	129/127	1.35	8	1.135	*	130/127	0.908	8	1.108	*	131/127	0.84	8	1.178	*	129/128	1.059	8	1.046	*	130/128	0.703
239	gi|53127352	hypothetical protein RCJMB04_1p8 [Gallus gallus]	2600	98977	81	71	24	22	38.5	5.32	1.83	Quantitation summary for protein	129/126	0.962	79	[1.039]		130/126	0.923	79	[1.045]		131/126	0.86	79	[1.081]		129/127	0.996	79	[1.048]		130/127	0.961	79	[1.032]		131/127	0.898	79	[1.058]		129/128	1.019	78	1.029	*	130/128	0.969
240	gi|363731688	PREDICTED: monofunctional C1-tetrahydrofolate synthase, mitochondrial [Gallus gallus]	2598	114695	92	82	28	24	35.4	8.3	1.53	Quantitation summary for protein	129/126	1.005	87	1.027		130/126	1.092	87	[1.035]		131/126	0.976	87	[1.052]		129/127	1.019	86	1.029	*	130/127	1.114	87	1.033	*	131/127	0.997	87	[1.048]		129/128	0.968	86	1.023	*	130/128	1.046
241	gi|363738379	PREDICTED: NAD(P)H dehydrogenase [quinone] 1 isoform 2 [Gallus gallus]	2598	34652	116	105	19	16	65.7	8.81	21.41	Quantitation summary for protein	129/126	1.191	110	1.104	*	130/126	0.945	110	[1.102]		131/126	0.909	110	[1.242]		129/127	1.122	110	[1.104]		130/127	0.896	110	[1.077]		131/127	0.865	110	[1.224]		129/128	1.065	110	[1.058]		130/128	0.839
242	gi|53130422	hypothetical protein RCJMB04_7l20 [Gallus gallus]	2579	80519	125	107	30	27	39.4	9.52	5.54	Quantitation summary for protein	129/126	0.997	69	[1.053]		130/126	1.041	69	[1.076]		131/126	1.351	69	[1.127]		129/127	0.892	69	[1.085]		130/127	0.939	69	[1.047]		131/127	1.221	69	[1.098]		129/128	1.109	69	[1.028]		130/128	1.151
243	gi|272753691	aminopeptidase N [Gallus gallus]	2573	115344	104	91	24	23	30	5.03	1.66	Quantitation summary for protein	129/126	0.89	7	1.316		130/126	1.056	7	1.131		131/126	1.335	7	[2.188]		129/127	0.906	7	[1.340]		130/127	1.082	7	1.166		131/127	1.371	7	[2.232]		129/128	0.816	7	1.041	*	130/128	0.962
244	gi|53135998	hypothetical protein RCJMB04_26g6 [Gallus gallus]	2560	88892	146	95	36	30	51.8	7.42	3.57	Quantitation summary for protein	129/126	0.972	100	[1.053]		130/126	1.147	101	[1.064]		131/126	0.78	100	[1.122]		129/127	0.929	100	[1.066]		130/127	1.103	100	[1.050]		131/127	0.752	100	[1.114]		129/128	0.86	100	[1.035]		130/128	1.009
245	gi|53128300	hypothetical protein RCJMB04_4l9 [Gallus gallus]	2557	63012	97	84	20	18	46.1	5.71	5.56	Quantitation summary for protein	129/126	1.3	90	1.041	*	130/126	0.779	90	[1.065]		131/126	1.267	91	[1.077]		129/127	1.229	91	1.06	*	130/127	0.76	90	[1.054]		131/127	1.24	91	[1.064]		129/128	1.453	90	[1.034]		130/128	0.887
246	gi|5006901	6-phosphofructo-2-kinase/fructose-2, 6-bisphosphatase [Gallus gallus]	2552	59294	99	87	25	23	59.6	6.82	5.27	Quantitation summary for protein	129/126	0.797	79	1.043	*	130/126	0.937	79	1.045	*	131/126	0.72	79	1.083	*	129/127	0.836	80	1.045	*	130/127	0.965	79	1.045	*	131/127	0.762	79	1.075	*	129/128	0.976	80	[1.042]		130/128	1.15
247	gi|118101125	PREDICTED: aflatoxin B1 aldehyde reductase member 4 [Gallus gallus]	2548	40839	118	98	19	15	49.1	6.76	9.33	Quantitation summary for protein	129/126	0.986	101	[1.099]		130/126	0.935	101	[1.108]		131/126	0.885	102	[1.151]		129/127	0.994	101	[1.078]		130/127	0.95	101	[1.058]		131/127	0.9	101	[1.124]		129/128	0.951	101	[1.027]		130/128	0.896
248	gi|313661515	hydroxyacid oxidase 1 [Gallus gallus]	2548	46960	136	131	16	16	40.5	8.46	4.1	Quantitation summary for protein	129/126	1.026	131	1.04	*	130/126	1.058	132	[1.068]		131/126	1.373	132	[1.103]		129/127	0.72	133	[1.062]		130/127	0.757	132	1.049	*	131/127	0.985	133	[1.092]		129/128	0.856	132	1.039	*	130/128	0.887
249	gi|50753535	PREDICTED: uncharacterized oxidoreductase C663.09c [Gallus gallus]	2548	31808	105	95	15	15	57.1	8.78	20.65	Quantitation summary for protein	129/126	1.321	55	[1.046]		130/126	0.776	55	1.066	*	131/126	0.857	55	1.123	*	129/127	1.055	55	[1.054]		130/127	0.624	55	1.062	*	131/127	0.691	55	1.114	*	129/128	1.207	55	[1.037]		130/128	0.705
250	gi|86207	Ca2+-transporting ATPase (EC 3.6.3.8) SERCA2b - chicken	2547	130051	94	76	26	23	25.6	5.23	1.5	Quantitation summary for protein	129/126	1.744	48	1.081	*	130/126	1.145	48	[1.074]		131/126	0.772	48	1.117	*	129/127	2.174	48	[1.111]		130/127	1.438	48	1.056	*	131/127	0.972	48	1.086	*	129/128	1.396	48	1.042	*	130/128	0.911
251	gi|50754419	PREDICTED: urocanate hydratase [Gallus gallus]	2547	82548	115	101	23	21	29.6	7.21	2.34	Quantitation summary for protein	129/126	1.481	103	[1.072]		130/126	1.045	102	[1.118]		131/126	1.034	102	[1.175]		129/127	1.346	102	[1.138]		130/127	0.957	102	[1.064]		131/127	0.949	101	[1.117]		129/128	1.52	103	[1.045]		130/128	1.066
252	gi|53136418	hypothetical protein RCJMB04_28l17 [Gallus gallus]	2541	124178	104	92	33	30	38.7	5.7	2.3	Quantitation summary for protein	129/126	1.099	99	[1.047]		130/126	1.11	99	1.047	*	131/126	0.869	99	[1.074]		129/127	1.234	99	[1.070]		130/127	1.255	99	1.041	*	131/127	0.985	99	[1.057]		129/128	1.119	99	[1.031]		130/128	1.123
253	gi|363737203	PREDICTED: eukaryotic translation initiation factor 4 gamma 1 [Gallus gallus]	2503	206662	124	97	34	29	21.6	5.24	1.02	Quantitation summary for protein	129/126	0.989	96	[1.042]		130/126	0.901	95	[1.069]		131/126	0.726	94	[1.138]		129/127	1.118	96	[1.060]		130/127	1.026	95	[1.045]		131/127	0.828	94	[1.116]		129/128	1.072	96	[1.020]		130/128	0.97
254	gi|2766187	aminopeptidase Ey [Gallus gallus]	2500	115132	99	87	23	22	30.9	5.06	1.59	Quantitation summary for protein	129/126	0.843	2	1.068		130/126	0.732	2	1.073		131/126	0.602	2	1.129		129/127	1.067	2	1.008		130/127	0.933	2	1.013		131/127	0.769	2	1.065		129/128	0.878	2	1.12		130/128	0.758
255	gi|50749392	PREDICTED: protein transport protein Sec24C [Gallus gallus]	2499	135933	89	78	20	18	19.4	6.39	0.81	Quantitation summary for protein	129/126	1.135	82	[1.037]		130/126	0.964	82	[1.060]		131/126	0.905	82	[1.086]		129/127	1.167	82	1.047	*	130/127	0.998	82	1.055		131/127	0.939	82	1.08	*	129/128	1.124	83	1.036	*	130/128	0.95
256	gi|53127099	hypothetical protein RCJMB04_1i23 [Gallus gallus]	2494	37899	122	98	25	22	75.7	9.89	27.63	Quantitation summary for protein	129/126	0.755	112	[1.058]		130/126	1.097	112	1.059	*	131/126	1.636	112	[1.120]		129/127	0.625	112	[1.086]		130/127	0.915	112	[1.061]		131/127	1.368	112	[1.124]		129/128	0.797	112	[1.055]		130/128	1.151
257	gi|6179570	radixin [Gallus gallus]	2491	83522	137	109	30	26	42.9	6.11	4.66	Quantitation summary for protein	129/126	0.914	77	[1.047]		130/126	1.042	76	[1.080]		131/126	1.367	77	[1.154]		129/127	0.835	77	[1.055]		130/127	0.958	76	[1.059]		131/127	1.261	77	[1.134]		129/128	0.905	76	1.026	*	130/128	1.025
258	gi|397529551	ras-related protein Rab-1A [Gallus gallus]	2477	27046	94	79	16	13	74.6	5.93	19.47	Quantitation summary for protein	129/126	1.105	73	1.048	*	130/126	0.925	73	[1.083]		131/126	0.478	71	1.133	*	129/127	1.544	72	[1.067]		130/127	1.301	72	[1.052]		131/127	0.674	71	1.093	*	129/128	1.213	73	1.033	*	130/128	1.008
259	gi|459683873	dehydrogenase/reductase SDR family member 4 [Gallus gallus]	2459	30420	98	90	11	11	40.7	9.26	5.47	Quantitation summary for protein	129/126	0.913	93	1.037	*	130/126	0.977	93	[1.046]		131/126	1.088	93	[1.084]		129/127	0.823	93	[1.058]		130/127	0.887	93	[1.039]		131/127	0.99	93	[1.082]		129/128	0.87	93	1.029	*	130/128	0.925
260	gi|363740095	PREDICTED: putative acyl-CoA dehydrogenase AidB-like [Gallus gallus]	2458	76561	86	79	23	21	43.3	7.53	2.99	Quantitation summary for protein	129/126	0.882	82	1.062	*	130/126	0.884	82	[1.085]		131/126	0.946	80	[1.129]		129/127	0.792	81	[1.086]		130/127	0.799	81	[1.061]		131/127	0.857	80	[1.102]		129/128	0.707	82	1.054	*	130/128	0.704
261	gi|118094580	PREDICTED: carnitine O-palmitoyltransferase 2, mitochondrial [Gallus gallus]	2450	85031	126	95	31	28	49.7	8.53	3.72	Quantitation summary for protein	129/126	0.799	108	1.059	*	130/126	1.097	109	[1.091]		131/126	1.128	108	[1.143]		129/127	0.601	108	[1.101]		130/127	0.83	109	[1.047]		131/127	0.856	108	1.094	*	129/128	0.755	108	1.036	*	130/128	1.03
262	gi|53128824	hypothetical protein RCJMB04_5d11 [Gallus gallus]	2438	32587	101	94	17	15	54.5	4.76	15.61	Quantitation summary for protein	129/126	1.065	26	1.116	*	130/126	0.839	26	1.253	*	131/126	0.925	24	1.653		129/127	1.147	26	1.136	*	130/127	0.91	26	[1.189]		131/127	0.985	24	1.591		129/128	1.122	18	1.021	*	130/128	0.903
263	gi|11999245	ATP synthase alpha subunit [Gallus gallus]	2431	14292	118	96	15	12	72.7	9.93	316.97	Quantitation summary for protein	129/126	1.409	5	1.252	*	130/126	2.812	5	1.194	*	131/126	11.995	5	1.284	*	129/127	1.137	5	[1.376]		130/127	2.284	5	1.293	*	131/127	9.768	5	1.379	*	129/128	1.16	5	1.307		130/128	2.299
264	gi|63566	unnamed protein product [Gallus gallus]	2424	43880	133	96	23	19	55.7	7.75	14.8	Quantitation summary for protein	129/126	0.706	107	[1.124]		130/126	0.569	107	[1.150]		131/126	0.544	107	[1.255]		129/127	1.085	107	[1.183]		130/127	0.879	107	[1.107]		131/127	0.841	107	[1.235]		129/128	0.932	107	[1.059]		130/128	0.748
265	gi|53130416	hypothetical protein RCJMB04_7j20 [Gallus gallus]	2421	50830	103	81	19	16	55.5	8.65	7.46	Quantitation summary for protein	129/126	0.756	91	[1.045]		130/126	0.912	91	[1.041]		131/126	1.005	91	[1.062]		129/127	0.622	91	[1.061]		130/127	0.755	89	1.035	*	131/127	0.835	91	[1.054]		129/128	0.764	91	1.038	*	130/128	0.915
266	gi|60099015	hypothetical protein RCJMB04_19g16 [Gallus gallus]	2413	64504	115	96	29	22	49.1	5.57	5.29	Quantitation summary for protein	129/126	1.217	103	1.064	*	130/126	1.128	103	1.074	*	131/126	1.055	101	1.1	*	129/127	1.244	103	[1.089]		130/127	1.161	103	1.053	*	131/127	1.089	101	1.078	*	129/128	1.167	102	1.036	*	130/128	1.076
267	gi|2327000	alcohol dehydrogenase ADH-F [Gallus gallus]	2409	47537	109	93	17	16	42.6	7.85	10.21	Quantitation summary for protein	129/126	0.715	91	1.055	*	130/126	0.905	91	[1.068]		131/126	0.908	91	[1.118]		129/127	0.563	91	[1.073]		130/127	0.716	91	1.055	*	131/127	0.721	91	[1.100]		129/128	0.596	91	[1.049]		130/128	0.75
268	gi|53127764	hypothetical protein RCJMB04_3f8 [Gallus gallus]	2404	63047	126	106	23	17	36.8	8.19	5.23	Quantitation summary for protein	129/126	0.787	110	[1.035]		130/126	1.028	112	1.046	*	131/126	1.329	112	[1.085]		129/127	0.611	110	[1.058]		130/127	0.803	112	1.034	*	131/127	1.041	112	[1.078]		129/128	0.873	109	[1.024]		130/128	1.132
269	gi|363735591	PREDICTED: eukaryotic translation initiation factor 3 subunit A [Gallus gallus]	2401	185080	139	113	48	37	34	6.74	1.4	Quantitation summary for protein	129/126	1.196	118	[1.044]		130/126	1.068	118	[1.041]		131/126	0.934	118	[1.055]		129/127	1.297	118	[1.064]		130/127	1.166	118	1.033	*	131/127	1.022	118	[1.038]		129/128	1.219	118	[1.031]		130/128	1.081
270	gi|363739376	PREDICTED: serine hydroxymethyltransferase, cytosolic [Gallus gallus]	2376	61089	105	92	18	17	38.6	8.2	4.95	Quantitation summary for protein	129/126	1.229	94	[1.055]		130/126	1.193	94	[1.063]		131/126	2.016	94	[1.147]		129/127	1.08	95	[1.059]		130/127	1.059	95	[1.058]		131/127	1.832	95	[1.148]		129/128	1.076	96	[1.029]		130/128	1.041
271	gi|50748450	PREDICTED: protein transport protein Sec23A [Gallus gallus]	2375	93918	104	88	23	20	31.2	6.51	1.8	Quantitation summary for protein	129/126	1.164	73	1.034	*	130/126	1.122	73	[1.070]		131/126	1.317	73	[1.098]		129/127	1.067	73	1.039	*	130/127	1.037	73	[1.049]		131/127	1.22	73	[1.081]		129/128	1.163	73	1.036	*	130/128	1.115
272	gi|118084650	PREDICTED: propionyl-CoA carboxylase alpha chain, mitochondrial [Gallus gallus]	2363	90476	94	87	32	32	44.7	7.85	3.3	Quantitation summary for protein	129/126	0.921	91	[1.038]		130/126	0.902	91	[1.064]		131/126	0.947	91	[1.107]		129/127	0.893	91	[1.055]		130/127	0.881	91	1.044	*	131/127	0.927	91	[1.083]		129/128	0.925	91	[1.026]		130/128	0.9
273	gi|53133318	hypothetical protein RCJMB04_15g7 [Gallus gallus]	2347	23343	94	75	15	13	47.4	8.91	36.46	Quantitation summary for protein	129/126	0.861	79	[1.064]		130/126	1.165	79	[1.094]		131/126	1.023	79	1.179		129/127	0.771	79	[1.103]		130/127	1.05	79	[1.062]		131/127	0.924	79	[1.146]		129/128	0.873	79	1.029	*	130/128	1.172
274	gi|53127436	hypothetical protein RCJMB04_2g5 [Gallus gallus]	2344	44082	147	104	24	17	48.5	6.92	15.75	Quantitation summary for protein	129/126	0.834	128	[1.140]		130/126	1.02	128	[1.165]		131/126	1.386	128	[1.257]		129/127	0.683	128	[1.241]		130/127	0.841	127	1.072	*	131/127	1.145	128	1.168	*	129/128	0.895	128	[1.074]		130/128	1.088
275	gi|363746869	PREDICTED: 3-hydroxyacyl-CoA dehydrogenase type-2, partial [Gallus gallus]	2339	24379	75	71	10	10	69.7	8.98	23.73	Quantitation summary for protein	129/126	0.763	34	1.061	*	130/126	0.926	35	1.08	*	131/126	1.082	36	[1.111]		129/127	0.647	35	1.089	*	130/127	0.797	35	1.078	*	131/127	0.931	36	[1.101]		129/128	0.788	35	1.065	*	130/128	0.952
276	gi|268370289	thiosulfate sulfurtransferase [Gallus gallus]	2327	37677	90	84	13	10	36.1	6.8	3.56	Quantitation summary for protein	129/126	0.993	64	[1.070]		130/126	1.021	64	[1.132]		131/126	1.239	64	[1.194]		129/127	0.747	64	[1.110]		130/127	0.774	64	[1.063]		131/127	0.941	64	[1.102]		129/128	0.871	64	[1.029]		130/128	0.89
277	gi|60098639	hypothetical protein RCJMB04_4d23 [Gallus gallus]	2320	54720	85	76	20	17	49.2	5.83	4.13	Quantitation summary for protein	129/126	1.94	5	1.088	*	130/126	1.254	5	[1.052]		131/126	2.139	5	1.066	*	129/127	2.531	5	[1.096]		130/127	1.647	5	1.084	*	131/127	2.815	5	1.081	*	129/128	1.53	5	1.028	*	130/128	0.982
278	gi|53127302	hypothetical protein RCJMB04_1l21 [Gallus gallus]	2316	49163	127	98	18	16	42.1	6.06	6.01	Quantitation summary for protein	129/126	0.745	108	[1.049]		130/126	0.766	108	[1.059]		131/126	0.703	107	[1.128]		129/127	0.767	108	[1.072]		130/127	0.794	108	1.038	*	131/127	0.731	107	[1.108]		129/128	0.827	108	[1.029]		130/128	0.844
279	gi|53130414	hypothetical protein RCJMB04_7j3 [Gallus gallus]	2302	66299	102	87	25	21	41.4	5.8	4.71	Quantitation summary for protein	129/126	0.941	92	[1.044]		130/126	1.023	92	[1.071]		131/126	1.335	92	[1.140]		129/127	0.862	92	[1.052]		130/127	0.944	92	[1.044]		131/127	1.234	92	[1.110]		129/128	1.13	92	1.023	*	130/128	1.221
280	gi|53136894	hypothetical protein RCJMB04_35l12 [Gallus gallus]	2289	72844	78	66	20	17	38.9	9.12	2.75	Quantitation summary for protein	129/126	0.94	70	1.03	*	130/126	1.077	70	1.034	*	131/126	1.283	70	1.034	*	129/127	0.894	72	1.04	*	130/127	1.028	71	[1.039]		131/127	1.206	72	1.042	*	129/128	0.876	72	[1.023]		130/128	0.996
281	gi|50800573	PREDICTED: 60S acidic ribosomal protein P2 [Gallus gallus]	2288	14356	102	86	10	10	77.4	4.42	134.41	Quantitation summary for protein	129/126	0.967	91	[1.081]		130/126	1.728	91	[1.189]		131/126	3.49	91	[1.364]		129/127	0.67	92	[1.112]		130/127	1.212	91	[1.098]		131/127	2.44	91	[1.279]		129/128	1.155	92	[1.039]		130/128	2.066
282	gi|363731455	PREDICTED: glycine N-methyltransferase, partial [Gallus gallus]	2280	27683	65	59	7	7	43.5	6.82	3.92	Quantitation summary for protein	129/126	0.83	59	[1.075]		130/126	1.091	59	1.048	*	131/126	1.04	59	[1.107]		129/127	0.658	59	[1.091]		130/127	0.871	59	1.045	*	131/127	0.831	59	[1.116]		129/128	0.719	59	1.051	*	130/128	0.94
283	gi|53126513	hypothetical protein RCJMB04_1d23 [Gallus gallus]	2258	28358	85	77	16	14	62.3	5.22	17.04	Quantitation summary for protein	129/126	1.03	81	[1.198]		130/126	0.794	81	[1.094]		131/126	1.042	81	[1.206]		129/127	1.085	81	[1.249]		130/127	0.843	81	1.07	*	131/127	1.108	81	[1.156]		129/128	1.118	81	[1.108]		130/128	0.857
284	gi|118088	RecName: Full=Peptidyl-prolyl cis-trans isomerase B; Short=PPIase B; AltName: Full=Cyclophilin B; AltName: Full=Rotamase B; AltName: Full=S-cyclophilin; Short=SCYLP; Flags: Precursor	2255	28185	89	75	16	15	61.4	9.4	19.4	Quantitation summary for protein	129/126	1.186	76	[1.082]		130/126	1.248	76	[1.102]		131/126	2.057	76	[1.164]		129/127	1.069	76	[1.120]		130/127	1.132	76	[1.053]		131/127	1.87	76	[1.106]		129/128	1.301	76	1.042	*	130/128	1.36
285	gi|21320894	D-erythrulose reductase [Gallus gallus]	2254	28441	88	73	12	10	45.9	6.84	13.3	Quantitation summary for protein	129/126	0.924	79	[1.041]		130/126	1.007	79	[1.055]		131/126	1.13	79	[1.073]		129/127	0.814	79	[1.049]		130/127	0.877	78	1.036	*	131/127	1.003	79	[1.052]		129/128	0.854	79	1.029	*	130/128	0.924
286	gi|363743802	PREDICTED: thimet oligopeptidase-like [Gallus gallus]	2249	91604	102	89	29	25	42.9	5.78	2.42	Quantitation summary for protein	129/126	1.12	99	[1.056]		130/126	1.002	99	[1.061]		131/126	1.044	99	[1.075]		129/127	1.037	99	[1.084]		130/127	0.934	99	1.035	*	131/127	0.975	99	1.065	*	129/128	1.165	99	[1.033]		130/128	1.036
287	gi|63359	cytochrome C [Gallus gallus]	2248	16171	92	86	11	10	71.4	9.52	64.2	Quantitation summary for protein	129/126	0.685	87	[1.089]		130/126	1.317	87	1.101	*	131/126	1.707	87	[1.158]		129/127	0.571	87	[1.119]		130/127	1.106	87	1.078	*	131/127	1.437	87	[1.124]		129/128	0.897	87	1.036	*	130/128	1.713
288	gi|212243	l-caldesmon [Gallus gallus]	2248	74349	100	81	26	20	43.1	8.66	2.5	Quantitation summary for protein	129/126	1	86	1.06		130/126	1.438	86	[1.130]		131/126	1.506	86	[1.204]		129/127	0.953	86	1.103	*	130/127	1.379	86	[1.071]		131/127	1.448	86	[1.142]		129/128	1.033	86	1.03	*	130/128	1.476
289	gi|53129586	hypothetical protein RCJMB04_5n23 [Gallus gallus]	2244	34759	126	103	27	23	66.9	4.69	23.31	Quantitation summary for protein	129/126	0.861	69	[1.036]		130/126	1.013	69	[1.097]		131/126	1.246	69	[1.185]		129/127	0.873	69	[1.064]		130/127	1.033	69	[1.053]		131/127	1.274	69	[1.139]		129/128	0.88	69	[1.028]		130/128	1.029
290	gi|363735594	PREDICTED: thioredoxin-dependent peroxide reductase, mitochondrial [Gallus gallus]	2226	29238	105	89	12	10	50.9	8.58	17.45	Quantitation summary for protein	129/126	0.773	99	[1.054]		130/126	1.215	100	[1.183]		131/126	1.452	100	[1.262]		129/127	0.568	100	[1.112]		130/127	0.899	100	[1.099]		131/127	1.071	100	[1.183]		129/128	0.908	99	[1.048]		130/128	1.418
291	gi|53127346	hypothetical protein RCJMB04_1o16 [Gallus gallus]	2223	92937	94	84	23	23	35.1	5.68	1.73	Quantitation summary for protein	129/126	1.288	87	1.028	*	130/126	0.999	87	[1.044]		131/126	0.989	87	[1.075]		129/127	1.193	87	[1.049]		130/127	0.932	87	1.026	*	131/127	0.924	87	[1.054]		129/128	1.226	87	[1.023]		130/128	0.945
292	gi|363731481	PREDICTED: uncharacterized protein LOC421337 [Gallus gallus]	2222	259112	106	86	42	34	21	4.65	0.69	Quantitation summary for protein	129/126	1.064	94	[1.035]		130/126	0.947	94	[1.040]		131/126	0.968	94	1.058	*	129/127	1.074	94	[1.058]		130/127	0.962	94	[1.027]		131/127	0.986	94	1.046	*	129/128	1.104	94	[1.022]		130/128	0.976
293	gi|211077	actinin [Gallus gallus]	2219	116426	98	75	28	21	38.7	5.31	1.36	Quantitation summary for protein	129/126	0.906	47	1.029	*	130/126	1.235	47	1.026	*	131/126	0.898	47	1.041	*	129/127	1.065	47	1.036	*	130/127	1.461	47	1.038	*	131/127	1.065	47	1.037	*	129/128	0.782	47	[1.028]		130/128	1.058
294	gi|363738588	PREDICTED: aminoacylase-1-like isoform 1 [Gallus gallus]	2210	51550	95	85	17	14	45.8	5.98	4.34	Quantitation summary for protein	129/126	0.78	88	1.071	*	130/126	1.165	88	[1.077]		131/126	1.085	88	[1.077]		129/127	0.655	88	[1.070]		130/127	0.985	86	1.039	*	131/127	0.92	88	[1.081]		129/128	0.795	88	1.042	*	130/128	1.181
295	gi|363732253	PREDICTED: glutathione S-transferase [Gallus gallus]	2209	30754	152	83	17	13	64.4	9.06	35.37	Quantitation summary for protein	129/126	1.162	10	[1.420]		130/126	0.607	10	[1.333]		131/126	0.421	10	[3.071]		129/127	1.323	10	[1.367]		130/127	0.696	10	1.299	*	131/127	0.484	10	[2.943]		129/128	1.213	10	[1.105]		130/128	0.629
296	gi|53129115	hypothetical protein RCJMB04_5g20 [Gallus gallus]	2204	32947	127	95	17	16	69.3	7.03	27.74	Quantitation summary for protein	129/126	0.79	100	[1.103]		130/126	1.039	100	[1.102]		131/126	1.085	100	[1.157]		129/127	0.656	100	[1.173]		130/127	0.869	100	[1.125]		131/127	0.91	100	[1.122]		129/128	1.035	100	1.042	*	130/128	1.353
297	gi|293631995	DJ-1 [Gallus gallus]	2198	23813	85	75	15	15	68.3	6.32	25.57	Quantitation summary for protein	129/126	0.762	76	[1.111]		130/126	1.061	76	[1.160]		131/126	1.518	76	[1.263]		129/127	0.653	76	[1.219]		130/127	0.916	76	[1.087]		131/127	1.314	76	[1.217]		129/128	0.913	76	1.062	*	130/128	1.263
298	gi|53133360	hypothetical protein RCJMB04_15n8 [Gallus gallus]	2191	62658	101	86	23	19	51.8	5.52	4.14	Quantitation summary for protein	129/126	1.148	97	[1.105]		130/126	0.933	97	[1.072]		131/126	0.912	97	[1.142]		129/127	1.154	97	[1.141]		130/127	0.944	97	[1.052]		131/127	0.925	97	[1.108]		129/128	1.162	97	[1.051]		130/128	0.938
299	gi|363727400	PREDICTED: ATP synthase subunit gamma, mitochondrial isoform 2 [Gallus gallus]	2189	38717	124	88	17	13	54.4	9.44	9.78	Quantitation summary for protein	129/126	0.84	98	[1.050]		130/126	1.247	100	[1.088]		131/126	1.847	100	[1.187]		129/127	0.635	99	[1.074]		130/127	0.95	102	[1.061]		131/127	1.411	102	[1.160]		129/128	0.803	99	[1.029]		130/128	1.185
300	gi|363727569	PREDICTED: cullin-associated NEDD8-dissociated protein 1 isoform 2 [Gallus gallus]	2182	152872	107	98	25	23	22.6	5.49	0.73	Quantitation summary for protein	129/126	1.093	75	[1.022]		130/126	1.058	75	[1.021]		131/126	0.804	75	[1.031]		129/127	1.32	75	[1.029]		130/127	1.286	75	1.02	*	131/127	0.98	75	1.028	*	129/128	1.019	75	[1.013]		130/128	0.983
301	gi|363738242	PREDICTED: diphosphomevalonate decarboxylase [Gallus gallus]	2179	46237	56	52	8	8	27.4	6.38	1.81	Quantitation summary for protein	129/126	0.892	54	[1.038]		130/126	0.839	54	1.063	*	131/126	0.889	54	[1.113]		129/127	0.857	54	[1.066]		130/127	0.812	54	1.043	*	131/127	0.862	54	[1.086]		129/128	0.967	53	1.034	*	130/128	0.901
302	gi|1763015	ubiquitin/ribosomal protein [Gallus gallus]	2179	24268	122	90	15	11	70.5	9.68	10.57	Quantitation summary for protein	129/126	0.717	32	1.125	*	130/126	0.879	32	[1.100]		131/126	0.964	32	[1.221]		129/127	0.905	32	1.105	*	130/127	1.131	31	1.085	*	131/127	1.228	32	[1.202]		129/128	1.121	32	1.082	*	130/128	1.365
303	gi|121081	RecName: Full=Glycine dehydrogenase [decarboxylating], mitochondrial; AltName: Full=Glycine cleavage system P protein; AltName: Full=Glycine decarboxylase; Flags: Precursor	2179	126325	93	79	27	24	29.3	7.55	1.27	Quantitation summary for protein	129/126	1.023	85	[1.038]		130/126	0.865	85	1.036	*	131/126	0.891	85	1.075	*	129/127	0.917	85	[1.050]		130/127	0.78	85	1.032	*	131/127	0.818	84	1.065	*	129/128	0.851	85	1.027	*	130/128	0.715
304	gi|118083310	PREDICTED: ubiquitin carboxyl-terminal hydrolase 5 isoform 2 [Gallus gallus]	2178	106627	78	69	19	15	27.4	5.03	0.94	Quantitation summary for protein	129/126	1.06	66	[1.049]		130/126	1.007	66	[1.060]		131/126	0.863	66	[1.087]		129/127	1.057	66	[1.072]		130/127	1.012	66	[1.043]		131/127	0.869	66	1.064	*	129/128	1.106	66	[1.038]		130/128	1.045
305	gi|53127438	hypothetical protein RCJMB04_2g17 [Gallus gallus]	2175	40915	97	84	15	15	46.1	8.67	8.5	Quantitation summary for protein	129/126	1.044	85	[1.149]		130/126	0.799	85	[1.172]		131/126	0.706	86	[1.352]		129/127	1.24	86	[1.166]		130/127	0.956	86	[1.126]		131/127	0.847	88	[1.299]		129/128	0.989	87	[1.072]		130/128	0.752
306	gi|363730896	PREDICTED: ribonuclease UK114 isoform 1 [Gallus gallus]	2171	17447	88	77	12	10	74.8	8.56	83.02	Quantitation summary for protein	129/126	0.642	83	[1.136]		130/126	0.953	83	[1.230]		131/126	1.062	82	[1.417]		129/127	0.566	83	[1.225]		130/127	0.846	83	[1.138]		131/127	0.944	82	[1.301]		129/128	0.704	81	1.093	*	130/128	1.038
307	gi|211780	fibrinogen beta chain, partial [Gallus gallus]	2160	62209	76	68	20	17	52.3	7.18	2.11	Quantitation summary for protein	129/126	1.229	71	[1.060]		130/126	0.912	71	[1.079]		131/126	0.86	71	[1.135]		129/127	1.17	71	[1.083]		130/127	0.874	71	1.065	*	131/127	0.826	71	[1.124]		129/128	1.152	71	[1.034]		130/128	0.849
308	gi|118094989	PREDICTED: coatomer subunit beta~ [Gallus gallus]	2160	117227	98	74	29	25	35.5	5.11	1.55	Quantitation summary for protein	129/126	1.093	91	[1.024]		130/126	0.963	91	[1.026]		131/126	0.963	91	[1.034]		129/127	1.071	90	1.026	*	130/127	0.954	91	1.024	*	131/127	0.956	91	1.027	*	129/128	1.183	91	1.021	*	130/128	1.035
309	gi|50756617	PREDICTED: beta-ureidopropionase [Gallus gallus]	2153	46697	85	72	20	20	42.8	5.76	6.74	Quantitation summary for protein	129/126	1.073	79	1.068	*	130/126	0.932	79	[1.100]		131/126	0.886	79	[1.177]		129/127	0.973	80	1.096	*	130/127	0.852	80	[1.079]		131/127	0.812	80	[1.149]		129/128	1.082	80	1.042	*	130/128	0.934
310	gi|50728520	PREDICTED: probable imidazolonepropionase [Gallus gallus]	2153	53935	75	66	17	16	47.8	6.29	4.58	Quantitation summary for protein	129/126	1.296	70	1.044	*	130/126	0.977	70	[1.043]		131/126	0.956	70	[1.087]		129/127	1.045	70	[1.065]		130/127	0.793	70	1.033	*	131/127	0.778	70	[1.081]		129/128	1.008	70	1.027	*	130/128	0.755
311	gi|2827446	nucleoside diphosphate kinase [Gallus gallus]	2150	18688	78	60	12	10	57.3	7.11	18.91	Quantitation summary for protein	129/126	0.567	17	1.172	*	130/126	0.909	17	1.262		131/126	1.826	17	1.853	*	129/127	0.347	16	1.209	*	130/127	0.531	17	1.304	*	131/127	1.07	17	1.926		129/128	0.384	18	1.202	*	130/128	0.606
312	gi|118100169	PREDICTED: AP-1 complex subunit beta-1 [Gallus gallus]	2142	120705	88	73	29	25	31	5.19	1.35	Quantitation summary for protein	129/126	1.055	40	[1.033]		130/126	1.037	40	[1.037]		131/126	0.857	39	[1.072]		129/127	1.154	41	1.039	*	130/127	1.141	40	1.037	*	131/127	0.946	40	[1.078]		129/128	1.041	41	[1.032]		130/128	1.016
313	gi|363728601	PREDICTED: 1,4-alpha-glucan-branching enzyme [Gallus gallus]	2136	99828	111	88	23	19	27.9	7.66	2.1	Quantitation summary for protein	129/126	1.392	97	[1.071]		130/126	1.219	97	1.1	*	131/126	1.005	96	1.126		129/127	1.011	97	[1.116]		130/127	0.892	97	[1.073]		131/127	0.737	96	1.095	*	129/128	1.227	97	1.033	*	130/128	1.068
314	gi|408500	beta-H globin [Gallus gallus]	2128	19219	139	95	12	12	65.3	9.2	40.13	Quantitation summary for protein	129/126	1.125	6	1.071	*	130/126	1.175	6	1.033	*	131/126	1.15	6	1.28		129/127	0.722	6	1.042	*	130/127	0.759	6	[1.097]		131/127	0.745	6	1.364		129/128	1.088	6	1.033	*	130/128	1.129
315	gi|363738114	PREDICTED: uncharacterized oxidoreductase C663.09c-like [Gallus gallus]	2119	30691	75	68	11	11	53.3	8.22	10.86	Quantitation summary for protein	129/126	0.876	39	1.054	*	130/126	1.538	39	[1.105]		131/126	1.356	39	1.128	*	129/127	0.797	39	[1.086]		130/127	1.408	39	[1.084]		131/127	1.245	39	1.101	*	129/128	0.588	39	[1.133]		130/128	1.026
316	gi|2687360	sulfotransferase [Gallus gallus]	2116	43667	107	92	19	18	57.7	5.89	7.93	Quantitation summary for protein	129/126	0.783	97	[1.068]		130/126	1.07	97	[1.063]		131/126	0.765	96	[1.088]		129/127	0.429	97	[1.110]		130/127	0.59	97	1.045	*	131/127	0.421	96	1.108	*	129/128	0.583	97	[1.048]		130/128	0.792
317	gi|118082912	PREDICTED: tRNA-splicing ligase RtcB homolog [Gallus gallus]	2115	63053	89	78	23	19	45.7	6.79	3.83	Quantitation summary for protein	129/126	1.18	83	1.048	*	130/126	0.979	83	[1.061]		131/126	0.938	83	[1.142]		129/127	1.083	83	[1.085]		130/127	0.905	83	[1.043]		131/127	0.869	83	[1.109]		129/128	1.219	82	1.032	*	130/128	1.006
318	gi|60098651	hypothetical protein RCJMB04_4i13 [Gallus gallus]	2110	148505	85	71	26	23	22.8	5.94	1.1	Quantitation summary for protein	129/126	1.219	82	1.031	*	130/126	1.074	82	1.044	*	131/126	0.936	82	1.058	*	129/127	1.215	82	1.046	*	130/127	1.077	82	1.034	*	131/127	0.941	82	1.045	*	129/128	1.369	81	1.031	*	130/128	1.195
319	gi|363739650	PREDICTED: nucleoside diphosphate kinase, mitochondrial [Gallus gallus]	2105	21893	75	58	10	9	47.3	9.63	12.05	Quantitation summary for protein	129/126	0.537	13	1.334	*	130/126	0.908	13	1.351		131/126	0.905	13	1.798		129/127	0.648	12	1.486	*	130/127	1.072	13	1.533		131/127	1.072	13	1.889		129/128	0.66	13	1.497	*	130/128	1.108
320	gi|127095	RecName: Full=Myeloid protein 1; AltName: Full=p33; Flags: Precursor	2104	39849	80	64	14	11	54.3	8.73	3.93	Quantitation summary for protein	129/126	1.209	67	1.067	*	130/126	1.244	67	1.084	*	131/126	1.911	67	1.105	*	129/127	0.893	67	[1.080]		130/127	0.925	67	[1.105]		131/127	1.424	67	1.139	*	129/128	1.099	66	1.054	*	130/128	1.119
321	gi|121715	RecName: Full=Glutathione S-transferase 3; AltName: Full=GST class-alpha; AltName: Full=GST-CL3	2101	31637	127	80	15	13	50.7	9.05	31.97	Quantitation summary for protein	129/126	1.01	90	1.066		130/126	1.007	91	1.08		131/126	1.218	91	[1.161]		129/127	1.089	91	1.096	*	130/127	1.094	91	1.055	*	131/127	1.326	91	[1.132]		129/128	1.177	91	[1.054]		130/128	1.166
322	gi|53127484	hypothetical protein RCJMB04_2j13 [Gallus gallus]	2100	56593	90	72	25	21	61.2	5.72	4.15	Quantitation summary for protein	129/126	1.148	77	[1.032]		130/126	0.971	77	[1.037]		131/126	0.948	77	[1.111]		129/127	1.15	76	1.038	*	130/127	0.98	76	1.034	*	131/127	0.958	77	[1.103]		129/128	1.201	77	[1.030]		130/128	1.01
323	gi|60098603	hypothetical protein RCJMB04_3p13 [Gallus gallus]	2098	111055	68	63	24	23	32.6	5.32	1.68	Quantitation summary for protein	129/126	1.253	59	[1.048]		130/126	1.043	59	[1.056]		131/126	0.824	59	[1.091]		129/127	1.411	59	[1.069]		130/127	1.183	59	1.054	*	131/127	0.937	59	[1.092]		129/128	1.28	59	[1.043]		130/128	1.059
324	gi|1149509	37kD Laminin receptor precursor /p40 ribosomal associated protein [Gallus gallus]	2097	35865	85	70	15	14	47.3	4.8	10.89	Quantitation summary for protein	129/126	1.298	77	[1.128]		130/126	1.1	77	[1.080]		131/126	1.678	77	[1.171]		129/127	1.147	77	[1.155]		130/127	0.979	77	[1.071]		131/127	1.497	77	[1.155]		129/128	1.271	77	[1.085]		130/128	1.07
325	gi|363739179	PREDICTED: protein transport protein Sec24A [Gallus gallus]	2093	128944	63	60	17	16	20.5	8.07	0.73	Quantitation summary for protein	129/126	0.95	61	[1.034]		130/126	0.976	60	1.041	*	131/126	0.8	61	1.089	*	129/127	0.906	61	1.044	*	130/127	0.936	59	1.031	*	131/127	0.77	61	1.082	*	129/128	1.095	61	[1.046]		130/128	1.114
326	gi|125608	RecName: Full=Pyruvate kinase muscle isozyme	2090	66913	101	81	23	20	43.2	7.29	3.21	Quantitation summary for protein	129/126	0.924	84	[1.032]		130/126	0.835	84	[1.055]		131/126	0.894	84	[1.084]		129/127	1.144	84	1.05	*	130/127	1.044	83	1.034	*	131/127	1.117	84	[1.060]		129/128	0.833	84	[1.023]		130/128	0.749
327	gi|4959550	glutathione S-transferase class-alpha [Gallus gallus]	2088	26597	160	85	18	14	75.3	8.03	87.52	Quantitation summary for protein	129/126	1.162	10	[1.420]		130/126	0.607	10	[1.333]		131/126	0.421	10	[3.071]		129/127	1.323	10	[1.367]		130/127	0.696	10	1.299	*	131/127	0.484	10	[2.943]		129/128	1.213	10	[1.105]		130/128	0.629
328	gi|118095370	PREDICTED: arylacetamide deacetylase [Gallus gallus]	2083	48761	69	61	15	14	48.4	6.7	3.51	Quantitation summary for protein	129/126	1.042	65	[1.066]		130/126	1.181	65	[1.080]		131/126	0.844	64	1.063	*	129/127	0.987	65	1.073		130/127	1.127	65	[1.072]		131/127	1.209	65	1.094	*	129/128	0.959	65	[1.054]		130/128	1.08
329	gi|363730685	PREDICTED: NADH dehydrogenase [ubiquinone] flavoprotein 2, mitochondrial isoform 2 [Gallus gallus]	2081	31213	96	85	12	12	49.8	8.16	11.57	Quantitation summary for protein	129/126	0.769	88	[1.068]		130/126	0.944	88	[1.073]		131/126	1.389	88	[1.162]		129/127	0.685	88	[1.099]		130/127	0.847	88	1.052	*	131/127	1.249	88	[1.146]		129/128	0.789	88	1.039	*	130/128	0.962
330	gi|53133686	hypothetical protein RCJMB04_19g1 [Gallus gallus]	2073	31831	101	91	20	18	68	9.68	31.2	Quantitation summary for protein	129/126	1.054	96	[1.069]		130/126	1.053	96	1.067	*	131/126	1.23	96	[1.101]		129/127	0.86	96	[1.096]		130/127	0.865	96	1.051	*	131/127	1.013	96	[1.089]		129/128	1.081	95	[1.048]		130/128	1.072
331	gi|3420175	WDR1 protein [Gallus gallus]	2069	77521	83	75	17	15	30.9	6.19	2.06	Quantitation summary for protein	129/126	0.922	82	[1.041]		130/126	0.931	81	1.049	*	131/126	1.008	82	[1.075]		129/127	1.064	82	[1.050]		130/127	1.067	82	[1.053]		131/127	1.174	82	[1.053]		129/128	0.897	82	[1.023]		130/128	0.888
332	gi|3822553	nuclear calmodulin-binding protein [Gallus gallus]	2069	92031	83	73	25	24	28.3	4.68	1.96	Quantitation summary for protein	129/126	0.928	26	1.052	*	130/126	0.944	25	1.108	*	131/126	0.831	26	1.206	*	129/127	1.023	27	1.094		130/127	1.047	26	1.096	*	131/127	0.924	26	1.169	*	129/128	0.954	24	1.033	*	130/128	0.964
333	gi|53133620	hypothetical protein RCJMB04_18k11 [Gallus gallus]	2066	29887	109	89	19	16	66.5	5.72	28.38	Quantitation summary for protein	129/126	0.93	98	[1.063]		130/126	1.106	98	[1.064]		131/126	1.512	98	[1.147]		129/127	0.88	98	[1.079]		130/127	1.054	98	[1.051]		131/127	1.444	98	[1.130]		129/128	0.961	98	[1.025]		130/128	1.135
334	gi|53132964	hypothetical protein RCJMB04_14e22 [Gallus gallus]	2065	59633	99	77	20	17	37.5	10.2	4.89	Quantitation summary for protein	129/126	1.364	76	1.049	*	130/126	0.989	76	[1.049]		131/126	1.069	76	[1.091]		129/127	1.282	76	1.061	*	130/127	0.938	76	1.036	*	131/127	1.013	76	1.074		129/128	1.23	77	1.035	*	130/128	0.888
335	gi|53129915	hypothetical protein RCJMB04_6e4 [Gallus gallus]	2064	37997	96	79	18	17	58.4	9.73	6.44	Quantitation summary for protein	129/126	0.998	34	1.13		130/126	1.081	34	1.136	*	131/126	0.724	34	1.227	*	129/127	1.141	33	1.138	*	130/127	1.247	34	1.111	*	131/127	0.837	34	1.191	*	129/128	0.96	34	[1.086]		130/128	1.033
336	gi|118082784	PREDICTED: probable ATP-dependent RNA helicase DDX17 [Gallus gallus]	2033	81242	88	71	23	21	34.5	8.85	2.84	Quantitation summary for protein	129/126	0.997	54	[1.041]		130/126	0.963	53	1.052	*	131/126	0.759	54	[1.114]		129/127	1.136	54	1.048	*	130/127	1.108	53	1.043	*	131/127	0.873	54	[1.096]		129/128	0.967	54	[1.029]		130/128	0.93
337	gi|363731145	PREDICTED: uncharacterized protein LOC769368 [Gallus gallus]	2030	89756	93	71	16	15	25.5	4.88	1.45	Quantitation summary for protein	129/126	1.135	54	[1.142]		130/126	1.081	54	[1.050]		131/126	1.342	55	[1.131]		129/127	1.008	54	[1.184]		130/127	0.967	54	[1.051]		131/127	1.197	55	[1.107]		129/128	1.313	55	[1.075]		130/128	1.242
338	gi|117257	RecName: Full=Cytochrome P450 2H1; AltName: Full=CYPIIH1; AltName: Full=Cytochrome P450 PB15; AltName: Full=Cytochrome P450 PCHP3	2029	64416	86	76	22	18	47	6.45	4.17	Quantitation summary for protein	129/126	0.718	41	1.066	*	130/126	0.703	41	[1.110]		131/126	0.409	41	[1.194]		129/127	0.865	41	[1.070]		130/127	0.852	41	[1.074]		131/127	0.498	41	[1.168]		129/128	0.494	41	[1.065]		130/128	0.481
339	gi|363745080	PREDICTED: deleted in malignant brain tumors 1 protein [Gallus gallus]	2028	112040	58	53	19	18	27	5.24	1.05	Quantitation summary for protein	129/126	1.17	56	[1.061]		130/126	1.081	56	[1.062]		131/126	0.975	56	[1.096]		129/127	1.201	56	[1.094]		130/127	1.117	56	[1.065]		131/127	1.009	56	[1.091]		129/128	1.106	56	1.046	*	130/128	1.015
340	gi|53127408	hypothetical protein RCJMB04_2d7 [Gallus gallus]	2024	91770	79	60	23	19	38.1	6.64	1.76	Quantitation summary for protein	129/126	1.018	62	[1.062]		130/126	0.977	62	[1.092]		131/126	1.109	62	[1.141]		129/127	0.969	62	[1.090]		130/127	0.937	62	[1.065]		131/127	1.065	62	[1.113]		129/128	1.022	62	1.051	*	130/128	0.975
341	gi|363737678	PREDICTED: IQ motif containing GTPase activating protein 1 [Gallus gallus]	2023	231218	99	70	32	27	20.9	6.22	0.7	Quantitation summary for protein	129/126	0.935	90	1.027	*	130/126	0.964	90	[1.032]		131/126	0.765	90	[1.062]		129/127	1.18	90	1.038	*	130/127	1.225	90	1.035	*	131/127	0.975	90	[1.053]		129/128	0.942	90	1.023	*	130/128	0.965
342	gi|53130584	hypothetical protein RCJMB04_8n6 [Gallus gallus]	2023	51535	80	67	17	15	42.2	6.74	2.91	Quantitation summary for protein	129/126	1.119	71	1.033	*	130/126	1.022	71	[1.034]		131/126	1.125	71	[1.070]		129/127	1.069	71	1.044	*	130/127	0.983	71	[1.034]		131/127	1.085	71	[1.070]		129/128	1.111	71	1.023	*	130/128	1.008
343	gi|115579	RecName: Full=F-actin-capping protein subunit alpha-2; AltName: Full=Beta-actinin subunit I; AltName: Full=CapZ 36/32	2019	38209	68	63	11	11	61.5	5.54	4.27	Quantitation summary for protein	129/126	0.911	50	[1.033]		130/126	0.794	50	1.025	*	131/126	0.871	50	[1.055]		129/127	1.063	50	1.038	*	130/127	0.933	50	1.029	*	131/127	1.026	50	1.052	*	129/128	0.914	51	[1.034]		130/128	0.791
344	gi|363744954	PREDICTED: glyoxylate reductase/hydroxypyruvate reductase [Gallus gallus]	2011	38802	77	64	18	17	59.8	8.14	13.85	Quantitation summary for protein	129/126	1.349	68	1.097	*	130/126	1.246	68	1.104	*	131/126	1.541	68	1.263	*	129/127	0.801	68	[1.115]		130/127	0.744	68	1.113	*	131/127	0.923	68	1.269	*	129/128	1.223	68	1.061	*	130/128	1.122
345	gi|363738452	PREDICTED: guanylate-binding protein 4-like [Gallus gallus]	2010	77049	68	60	17	14	25.9	5.63	1.61	Quantitation summary for protein	129/126	0.6	62	1.063	*	130/126	0.46	62	[1.113]		131/126	0.25	63	1.193	*	129/127	1.622	61	1.072	*	130/127	1.25	62	[1.066]		131/127	0.678	62	[1.110]		129/128	0.877	62	[1.059]		130/128	0.668
346	gi|355390334	delta-1-pyrroline-5-carboxylate dehydrogenase, mitochondrial [Gallus gallus]	2010	68665	87	75	23	18	42.3	8.22	2.53	Quantitation summary for protein	129/126	0.998	77	[1.053]		130/126	1.102	77	[1.088]		131/126	1.157	77	[1.116]		129/127	0.803	77	[1.075]		130/127	0.894	77	1.073	*	131/127	0.94	77	[1.098]		129/128	1.002	77	1.029		130/128	1.1
347	gi|71564542	soluble epoxide hydrolase [Gallus gallus]	2008	67618	105	91	19	16	40.2	5.89	3.35	Quantitation summary for protein	129/126	1.105	95	1.042	*	130/126	1.161	95	[1.072]		131/126	0.706	95	[1.082]		129/127	1	95	1.044		130/127	1.058	95	[1.072]		131/127	0.645	95	[1.087]		129/128	0.971	95	1.038	*	130/128	1.014
348	gi|118088958	PREDICTED: glutamate--cysteine ligase catalytic subunit [Gallus gallus]	2005	92250	90	78	22	18	31.7	5.97	1.85	Quantitation summary for protein	129/126	0.831	81	[1.034]		130/126	0.968	81	[1.078]		131/126	0.777	81	[1.147]		129/127	0.844	81	[1.062]		130/127	0.989	81	1.043	*	131/127	0.796	81	1.11	*	129/128	0.867	81	1.024	*	130/128	1.002
349	gi|118092623	PREDICTED: inorganic pyrophosphatase [Gallus gallus]	1996	39317	114	84	17	15	58.3	5.53	10.31	Quantitation summary for protein	129/126	1	86	[1.047]		130/126	0.898	86	[1.098]		131/126	0.902	85	[1.180]		129/127	1.003	86	[1.057]		130/127	0.907	86	[1.070]		131/127	0.914	85	[1.162]		129/128	1.024	86	[1.043]		130/128	0.914
350	gi|50744552	PREDICTED: amine sulfotransferase [Gallus gallus]	1989	41222	110	93	24	20	58.7	6.68	17.81	Quantitation summary for protein	129/126	1.3	98	[1.041]		130/126	1.006	98	[1.071]		131/126	1.124	98	[1.135]		129/127	1.177	98	[1.068]		130/127	0.917	98	[1.055]		131/127	1.027	98	[1.118]		129/128	1.082	98	1.023	*	130/128	0.832
351	gi|88909244	RecName: Full=Prohibitin	1987	32914	102	83	20	19	72.1	5.57	27.74	Quantitation summary for protein	129/126	0.835	96	[1.070]		130/126	1.098	96	1.048	*	131/126	1.265	96	[1.088]		129/127	0.746	96	[1.088]		130/127	0.987	96	[1.056]		131/127	1.14	96	[1.089]		129/128	0.776	96	[1.057]		130/128	1.013
352	gi|53131290	hypothetical protein RCJMB04_11i10 [Gallus gallus]	1975	121124	99	90	32	29	37.2	8.98	1.47	Quantitation summary for protein	129/126	0.862	94	[1.030]		130/126	0.795	93	[1.056]		131/126	0.841	94	[1.072]		129/127	1.161	94	[1.045]		130/127	1.078	93	[1.040]		131/127	1.142	94	[1.055]		129/128	0.876	94	1.024	*	130/128	0.803
353	gi|16304836	sulfotransferase 1C [Gallus gallus]	1973	43731	95	83	18	15	70.4	6.68	7.88	Quantitation summary for protein	129/126	1.168	91	1.03	*	130/126	1.157	91	[1.048]		131/126	0.928	90	1.068	*	129/127	0.787	91	[1.043]		130/127	0.785	91	[1.046]		131/127	0.716	91	1.072	*	129/128	0.723	91	[1.024]		130/128	0.711
354	gi|363728304	PREDICTED: alpha-2-macroglobulin [Gallus gallus]	1973	189101	92	72	32	23	25.8	6.09	0.88	Quantitation summary for protein	129/126	0.928	85	[1.040]		130/126	0.841	85	[1.062]		131/126	0.827	85	[1.100]		129/127	0.793	85	[1.047]		130/127	0.723	85	[1.041]		131/127	0.713	85	[1.078]		129/128	0.894	85	[1.027]		130/128	0.805
355	gi|212294	MHC B complex protein 12.3 [Gallus gallus]	1966	39636	81	73	17	16	54.3	7.6	6.42	Quantitation summary for protein	129/126	1.263	77	1.094	*	130/126	1.107	77	1.126	*	131/126	1.187	77	[1.219]		129/127	1.039	77	1.136	*	130/127	0.917	77	1.082	*	131/127	0.985	77	[1.170]		129/128	1.173	77	[1.065]		130/128	1.021
356	gi|61611929	visfatin [Gallus gallus]	1962	67124	83	71	20	19	44.2	6.66	2.63	Quantitation summary for protein	129/126	0.952	75	[1.103]		130/126	0.745	75	[1.079]		131/126	0.913	75	[1.170]		129/127	1.486	75	[1.131]		130/127	1.172	75	[1.068]		131/127	1.439	75	[1.151]		129/128	1.16	75	[1.046]		130/128	0.903
357	gi|363736947	PREDICTED: 6-phosphofructokinase, liver type isoform 1 [Gallus gallus]	1961	93342	81	61	27	22	42.1	7.21	2.23	Quantitation summary for protein	129/126	0.975	63	1.042	*	130/126	1.048	63	[1.084]		131/126	0.919	63	[1.085]		129/127	1.011	63	1.05		130/127	1.094	63	[1.078]		131/127	0.961	63	[1.071]		129/128	1.118	63	[1.035]		130/128	1.193
358	gi|311203838	hydroxymethylglutaryl-CoA lyase, mitochondrial isoform 1 [Gallus gallus]	1954	37825	77	67	17	16	52.4	8.07	10.38	Quantitation summary for protein	129/126	0.839	73	[1.081]		130/126	1.059	73	[1.059]		131/126	0.898	73	[1.103]		129/127	0.618	72	1.089	*	130/127	0.885	73	1.044	*	131/127	0.753	73	[1.098]		129/128	0.802	73	[1.055]		130/128	1.006
359	gi|50754485	PREDICTED: peroxisomal acyl-coenzyme A oxidase 2 [Gallus gallus]	1953	84952	86	72	23	20	35.6	8.23	2.12	Quantitation summary for protein	129/126	1.429	79	1.045	*	130/126	1.03	79	[1.062]		131/126	0.774	79	[1.104]		129/127	1.409	78	1.054	*	130/127	1.021	78	1.048	*	131/127	0.769	78	[1.094]		129/128	1.126	79	[1.045]		130/128	0.807
360	gi|313661476	spectrin beta chain, brain 1 [Gallus gallus]	1952	317822	106	88	38	35	19	5.37	0.53	Quantitation summary for protein	129/126	0.918	85	1.028	*	130/126	1.548	85	1.037	*	131/126	0.993	85	[1.050]		129/127	0.922	85	[1.037]		130/127	1.566	85	[1.029]		131/127	1.007	85	1.046		129/128	0.723	85	[1.031]		130/128	1.212
361	gi|53135290	hypothetical protein RCJMB04_24m10 [Gallus gallus]	1950	48868	86	80	18	16	48.4	5.29	4.12	Quantitation summary for protein	129/126	1.056	85	[1.025]		130/126	0.84	85	[1.032]		131/126	0.888	85	[1.075]		129/127	1.115	85	[1.036]		130/127	0.893	85	1.023	*	131/127	0.946	85	[1.065]		129/128	1.17	85	[1.018]		130/128	0.924
362	gi|363729287	PREDICTED: complement C4-like [Gallus gallus]	1948	220857	94	74	34	30	23.6	7.07	0.69	Quantitation summary for protein	129/126	1.369	80	[1.033]		130/126	1.095	80	[1.035]		131/126	1.096	80	[1.057]		129/127	1.234	80	[1.040]		130/127	0.993	80	[1.025]		131/127	0.997	80	[1.047]		129/128	1.196	80	1.021	*	130/128	0.95
363	gi|118102457	PREDICTED: corticosteroid 11-beta-dehydrogenase isozyme 1 [Gallus gallus]	1946	36524	61	53	12	11	49.5	6.46	5.19	Quantitation summary for protein	129/126	0.839	55	[1.086]		130/126	0.975	55	[1.112]		131/126	0.821	55	[1.111]		129/127	0.792	55	[1.097]		130/127	0.927	55	[1.104]		131/127	0.782	55	1.097	*	129/128	0.805	55	1.048	*	130/128	0.93
364	gi|363742292	PREDICTED: splicing factor, proline- and glutamine-rich [Gallus gallus]	1935	77206	96	81	24	20	39.4	9.49	2.63	Quantitation summary for protein	129/126	0.888	84	[1.038]		130/126	1.569	84	[1.049]		131/126	1.803	84	[1.083]		129/127	1.116	84	[1.042]		130/127	1.984	84	1.06	*	131/127	2.285	84	1.089	*	129/128	0.911	84	1.025	*	130/128	1.598
365	gi|50750688	PREDICTED: protein disulfide-isomerase A5 [Gallus gallus]	1934	74384	83	68	21	18	36.9	8.24	2.35	Quantitation summary for protein	129/126	1.103	74	[1.042]		130/126	1.248	74	[1.086]		131/126	1.143	74	[1.072]		129/127	1.103	74	[1.071]		130/127	1.256	74	[1.052]		131/127	1.154	74	1.052	*	129/128	1.084	74	1.029	*	130/128	1.217
366	gi|53128909	hypothetical protein RCJMB04_5e15 [Gallus gallus]	1933	75446	88	72	23	18	40.8	9.05	1.9	Quantitation summary for protein	129/126	1.162	58	[1.032]		130/126	1.039	58	[1.036]		131/126	1.062	58	1.066	*	129/127	1.158	58	1.044	*	130/127	1.045	57	1.025	*	131/127	1.068	58	1.055	*	129/128	1.397	58	1.039	*	130/128	1.241
367	gi|363743617	PREDICTED: lon protease homolog, mitochondrial [Gallus gallus]	1927	111460	79	68	27	23	36.8	5.8	1.52	Quantitation summary for protein	129/126	0.989	68	1.048		130/126	0.978	68	[1.132]		131/126	0.851	68	[1.168]		129/127	0.971	68	[1.068]		130/127	0.967	68	[1.074]		131/127	0.843	68	[1.117]		129/128	1.045	68	[1.045]		130/128	1.026
368	gi|363747261	PREDICTED: poly(rC)-binding protein 2-like isoform 1 [Gallus gallus]	1925	41418	78	63	15	13	51.1	7	4.02	Quantitation summary for protein	129/126	0.999	74	[1.066]		130/126	1.018	75	[1.046]		131/126	1.133	75	[1.083]		129/127	1.021	74	[1.097]		130/127	1.054	74	1.031	*	131/127	1.174	75	[1.056]		129/128	1.019	73	1.028	*	130/128	1.037
369	gi|53133808	hypothetical protein RCJMB04_20j11 [Gallus gallus]	1923	50420	94	85	21	18	50.4	8.62	9.43	Quantitation summary for protein	129/126	0.805	86	1.094	*	130/126	1.12	86	1.109	*	131/126	1.319	86	1.172	*	129/127	0.652	86	1.121	*	130/127	0.914	86	1.057	*	131/127	1.079	86	1.117	*	129/128	0.702	86	[1.082]		130/128	0.971
370	gi|363744460	PREDICTED: heterogeneous nuclear ribonucleoprotein K-like isoform 1 [Gallus gallus]	1913	52685	90	75	22	18	53.5	6.09	6.39	Quantitation summary for protein	129/126	0.973	81	[1.055]		130/126	1.011	81	[1.076]		131/126	1.039	81	[1.128]		129/127	0.996	80	[1.091]		130/127	1.039	80	1.043	*	131/127	1.069	80	[1.097]		129/128	0.967	81	[1.046]		130/128	0.998
371	gi|269784816	dolichyl-diphosphooligosaccharide--protein glycosyltransferase 48 kDa subunit [Gallus gallus]	1907	53375	66	58	18	14	34.3	5.37	2.96	Quantitation summary for protein	129/126	1.399	61	[1.062]		130/126	1.137	61	[1.059]		131/126	1.296	61	[1.118]		129/127	1.429	61	[1.076]		130/127	1.168	61	1.044	*	131/127	1.335	61	[1.094]		129/128	1.214	61	[1.028]		130/128	0.98
372	gi|363747068	PREDICTED: LOW QUALITY PROTEIN: transgelin-2-like [Gallus gallus]	1905	24921	71	67	15	13	75.9	9.03	14.84	Quantitation summary for protein	129/126	1.259	68	[1.055]		130/126	1.255	68	[1.082]		131/126	1.268	68	[1.122]		129/127	1.273	68	[1.066]		130/127	1.277	68	[1.067]		131/127	1.293	68	[1.108]		129/128	1.074	68	1.03	*	130/128	1.063
373	gi|63556	unnamed protein product [Gallus gallus]	1902	82286	74	61	25	19	39.3	6.5	1.76	Quantitation summary for protein	129/126	1.082	60	1.036	*	130/126	2.148	60	1.07	*	131/126	3.374	60	1.112	*	129/127	1.099	60	1.053	*	130/127	2.198	60	1.062	*	131/127	3.46	60	1.1	*	129/128	0.885	60	[1.029]		130/128	1.746
374	gi|6478775	dynamitin [Gallus gallus]	1901	50941	57	50	14	13	39.6	4.9	2.09	Quantitation summary for protein	129/126	1.039	49	1.036	*	130/126	0.932	49	1.056	*	131/126	0.983	49	[1.114]		129/127	1.017	49	1.042	*	130/127	0.918	49	1.034	*	131/127	0.971	49	[1.089]		129/128	1.086	49	1.035	*	130/128	0.968
375	gi|53128235	hypothetical protein RCJMB04_4k14 [Gallus gallus]	1901	96310	101	83	28	28	39.9	6.39	2.22	Quantitation summary for protein	129/126	1.465	78	1.052	*	130/126	1.271	78	[1.075]		131/126	0.978	78	[1.150]		129/127	1.224	78	1.075	*	130/127	1.07	78	[1.050]		131/127	0.825	78	[1.120]		129/128	1.321	78	[1.037]		130/128	1.139
376	gi|53127410	hypothetical protein RCJMB04_2d15 [Gallus gallus]	1889	81527	93	74	23	23	35.6	4.42	2.68	Quantitation summary for protein	129/126	1.576	81	[1.099]		130/126	1.159	80	[1.148]		131/126	1.008	78	[1.248]		129/127	1.772	81	[1.158]		130/127	1.312	80	[1.083]		131/127	1.143	78	[1.168]		129/128	1.479	81	[1.059]		130/128	1.082
377	gi|53133820	hypothetical protein RCJMB04_20k5 [Gallus gallus]	1889	68091	91	76	21	19	44.7	6.36	3.52	Quantitation summary for protein	129/126	1.222	87	[1.036]		130/126	1.029	87	1.046	*	131/126	1.173	87	[1.071]		129/127	1.079	87	[1.051]		130/127	0.915	87	[1.038]		131/127	1.045	87	[1.053]		129/128	1.149	87	[1.027]		130/128	0.962
378	gi|123331	RecName: Full=Hydroxymethylglutaryl-CoA synthase, cytoplasmic; Short=HMG-CoA synthase; AltName: Full=3-hydroxy-3-methylglutaryl coenzyme A synthase	1886	64337	81	69	16	15	32.8	5.41	2.84	Quantitation summary for protein	129/126	1.592	75	1.045	*	130/126	1.074	76	1.06	*	131/126	1.232	76	[1.139]		129/127	1.481	76	[1.073]		130/127	0.992	76	[1.044]		131/127	1.142	76	[1.135]		129/128	1.745	76	1.046	*	130/128	1.154
379	gi|363746971	PREDICTED: nuclear calmodulin-binding protein, partial [Gallus gallus]	1884	19291	61	55	13	13	63.5	9.19	17.04	Quantitation summary for protein	129/126	0.968	7	1.046		130/126	0.989	7	1.051		131/126	1.283	7	1.081	*	129/127	1.021	7	1.062		130/127	1.051	7	1.073		131/127	1.366	7	1.05	*	129/128	1.018	7	1.056		130/128	1.034
380	gi|118097622	PREDICTED: leucyl-tRNA synthetase, cytoplasmic [Gallus gallus]	1881	159735	71	58	20	16	18.7	6.51	0.63	Quantitation summary for protein	129/126	1.379	67	[1.047]		130/126	1.099	67	[1.059]		131/126	0.919	67	[1.089]		129/127	1.441	67	[1.069]		130/127	1.157	67	1.042	*	131/127	0.969	67	1.073	*	129/128	1.185	67	[1.026]		130/128	0.939
381	gi|363742669	PREDICTED: hepatoma-derived growth factor [Gallus gallus]	1878	34653	107	84	24	18	68.1	5.1	11.94	Quantitation summary for protein	129/126	1	94	[1.078]		130/126	0.787	94	[1.074]		131/126	0.641	94	[1.105]		129/127	1.151	94	[1.122]		130/127	0.913	94	[1.044]		131/127	0.745	94	[1.069]		129/128	0.997	94	[1.040]		130/128	0.78
382	gi|60098675	hypothetical protein RCJMB04_5e12 [Gallus gallus]	1877	32509	95	80	14	13	47.4	4.84	7.49	Quantitation summary for protein	129/126	0.96	21	1.082	*	130/126	0.775	21	1.124	*	131/126	0.736	20	1.192	*	129/127	1.11	21	[1.165]		130/127	0.902	21	1.055	*	131/127	0.85	20	[1.126]		129/128	1.076	21	1.043	*	130/128	0.863
383	gi|53134709	hypothetical protein RCJMB04_23k2 [Gallus gallus]	1875	55703	72	64	22	21	55	5.11	5.28	Quantitation summary for protein	129/126	1.101	64	[1.063]		130/126	0.98	64	1.066	*	131/126	1.168	64	[1.120]		129/127	1.053	65	[1.092]		130/127	0.944	65	[1.051]		131/127	1.128	65	[1.097]		129/128	1.212	65	1.056	*	130/128	1.072
384	gi|60099031	hypothetical protein RCJMB04_20k15 [Gallus gallus]	1865	61405	82	67	19	15	42.3	8.99	2.5	Quantitation summary for protein	129/126	1.026	71	[1.050]		130/126	1.258	71	[1.041]		131/126	1.008	71	[1.077]		129/127	0.839	71	[1.068]		130/127	1.035	71	[1.043]		131/127	0.831	71	[1.080]		129/128	0.94	71	[1.032]		130/128	1.145
385	gi|50729534	PREDICTED: homogentisate 1,2-dioxygenase [Gallus gallus]	1865	55388	70	65	11	10	27.1	6.35	1.83	Quantitation summary for protein	129/126	1.074	69	[1.056]		130/126	1.207	69	1.055	*	131/126	1.306	68	1.074	*	129/127	0.795	69	1.056	*	130/127	0.899	69	[1.045]		131/127	0.978	69	[1.063]		129/128	1.101	69	[1.055]		130/128	1.23
386	gi|118101780	PREDICTED: adenylate kinase 2, mitochondrial [Gallus gallus]	1859	29748	79	61	18	15	70.4	8.39	18.46	Quantitation summary for protein	129/126	0.853	68	1.081	*	130/126	0.895	68	1.071	*	131/126	0.905	68	[1.122]		129/127	0.841	68	1.097	*	130/127	0.888	68	[1.062]		131/127	0.901	68	[1.109]		129/128	0.991	68	1.042		130/128	1.033
387	gi|131608	RecName: Full=Amidophosphoribosyltransferase; Short=ATase; AltName: Full=Glutamine phosphoribosylpyrophosphate amidotransferase; Short=GPAT; Flags: Precursor	1857	62864	95	78	19	17	34.1	6.22	4.11	Quantitation summary for protein	129/126	0.825	4	1.107	*	130/126	0.88	4	1.039	*	131/126	0.698	4	1.039	*	129/127	0.75	4	1.13	*	130/127	0.805	4	[1.067]		131/127	0.64	4	1.092	*	129/128	0.849	4	1.072	*	130/128	0.9
388	gi|18252632	zipcode-binding protein [Gallus gallus]	1856	88613	74	70	22	20	31.5	6.46	1.57	Quantitation summary for protein	129/126	0.872	72	[1.037]		130/126	0.875	72	[1.084]		131/126	0.925	72	[1.107]		129/127	0.981	72	1.083	*	130/127	0.991	72	1.046		131/127	1.05	72	1.069	*	129/128	0.943	72	1.025	*	130/128	0.94
389	gi|62851	unnamed protein product [Gallus gallus]	1852	46692	79	69	20	19	56	6.92	4.89	Quantitation summary for protein	129/126	0.993	74	[1.073]		130/126	0.837	74	1.08	*	131/126	0.811	74	[1.132]		129/127	1.381	74	[1.093]		130/127	1.173	74	1.05	*	131/127	1.138	74	[1.093]		129/128	0.838	74	1.026	*	130/128	0.702
390	gi|196049778	Chain D, Chicken Cytochrome Bc1 Complex Inhibited By An Iodinated Analogue Of The Polyketide Crocacin-d	1850	30130	49	41	6	4	34.9	6.32	3.34	Quantitation summary for protein	129/126	0.776	44	1.076	*	130/126	1.197	44	1.047	*	131/126	0.677	44	1.096	*	129/127	0.807	44	1.072	*	130/127	1.253	44	1.05	*	131/127	0.711	44	1.094	*	129/128	0.748	43	1.061	*	130/128	1.14
391	gi|53130129	hypothetical protein RCJMB04_6h13 [Gallus gallus]	1843	47236	61	58	13	11	33.5	5.07	3.12	Quantitation summary for protein	129/126	1.06	61	[1.082]		130/126	1.039	61	1.035	*	131/126	0.894	61	[1.117]		129/127	1.153	61	[1.097]		130/127	1.138	61	1.039	*	131/127	0.982	61	1.102		129/128	1.049	61	[1.043]		130/128	1.021
392	gi|53130732	hypothetical protein RCJMB04_9m1 [Gallus gallus]	1843	78414	104	78	26	21	41.4	5.89	2.56	Quantitation summary for protein	129/126	1.088	92	[1.031]		130/126	0.981	92	[1.033]		131/126	0.944	92	[1.057]		129/127	1.013	92	[1.046]		130/127	0.922	90	1.022	*	131/127	0.887	92	[1.044]		129/128	1.063	92	[1.022]		130/128	0.952
393	gi|408358018	lanosterol synthase [Gallus gallus]	1834	92167	78	69	24	22	32.6	6.12	1.85	Quantitation summary for protein	129/126	1.297	74	1.023	*	130/126	1.203	74	[1.031]		131/126	0.791	73	1.036	*	129/127	1.354	74	1.027	*	130/127	1.265	74	[1.030]		131/127	0.844	74	[1.037]		129/128	1.429	74	1.02	*	130/128	1.317
394	gi|118092591	PREDICTED: putative hexokinase HKDC1 [Gallus gallus]	1830	119021	82	74	29	25	29.6	8.04	1.51	Quantitation summary for protein	129/126	0.804	72	[1.033]		130/126	0.912	72	[1.046]		131/126	0.675	72	[1.113]		129/127	0.758	72	[1.049]		130/127	0.865	72	[1.040]		131/127	0.642	72	[1.120]		129/128	0.649	72	[1.032]		130/128	0.731
395	gi|53127800	hypothetical protein RCJMB04_3g21 [Gallus gallus]	1826	40594	62	56	15	12	49.2	5.82	3.42	Quantitation summary for protein	129/126	0.904	59	1.074	*	130/126	0.819	59	[1.081]		131/126	0.979	59	[1.099]		129/127	0.858	59	[1.086]		130/127	0.783	59	1.054	*	131/127	0.937	59	[1.101]		129/128	1.111	59	1.043	*	130/128	1
396	gi|289797	YB-1 protein [Gallus gallus]	1820	39673	80	66	12	9	39.9	9.85	3.97	Quantitation summary for protein	129/126	1.068	57	[1.096]		130/126	0.956	66	[1.138]		131/126	1.102	67	[1.344]		129/127	1.144	57	[1.136]		130/127	1.01	64	[1.114]		131/127	1.138	65	[1.308]		129/128	1.112	55	1.069	*	130/128	0.943
397	gi|50745282	PREDICTED: methylmalonyl-CoA mutase, mitochondrial [Gallus gallus]	1817	94510	67	58	19	17	32.6	6.33	1.43	Quantitation summary for protein	129/126	0.865	64	[1.057]		130/126	1.049	64	1.053	*	131/126	0.961	64	1.083	*	129/127	0.736	64	[1.063]		130/127	0.9	64	1.042	*	131/127	0.826	64	[1.071]		129/128	0.754	64	[1.043]		130/128	0.909
398	gi|53136442	hypothetical protein RCJMB04_29b18 [Gallus gallus]	1814	26121	47	44	13	12	62.9	5.58	6.74	Quantitation summary for protein	129/126	0.834	45	[1.103]		130/126	0.813	45	[1.113]		131/126	0.939	45	[1.206]		129/127	0.873	45	[1.163]		130/127	0.857	45	1.059	*	131/127	0.992	45	[1.145]		129/128	1.016	45	1.033	*	130/128	0.984
399	gi|363737017	PREDICTED: propionyl-CoA carboxylase beta chain, mitochondrial [Gallus gallus]	1814	63364	74	61	23	19	53.9	6.8	2.92	Quantitation summary for protein	129/126	0.982	67	[1.051]		130/126	0.88	66	1.05	*	131/126	0.969	67	1.093	*	129/127	0.898	66	[1.067]		130/127	0.81	65	1.048	*	131/127	0.894	66	1.09	*	129/128	0.898	66	[1.039]		130/128	0.799
400	gi|121361	RecName: Full=Glutamine synthetase; Short=GS; AltName: Full=Glutamate decarboxylase; AltName: Full=Glutamate--ammonia ligase; AltName: Full=p42	1809	47559	99	74	19	14	48	6.38	7.57	Quantitation summary for protein	129/126	0.914	83	1.089	*	130/126	1.208	87	[1.149]		131/126	1.92	87	[1.248]		129/127	0.725	83	1.084	*	130/127	0.943	87	1.152	*	131/127	1.535	88	[1.236]		129/128	0.764	83	1.075	*	130/128	1.004
401	gi|50511717	carnitine palmitoyltransferase I [Gallus gallus]	1805	100946	77	65	21	16	30.1	8.62	1.29	Quantitation summary for protein	129/126	0.798	70	1.042	*	130/126	0.938	70	1.036	*	131/126	0.601	70	[1.080]		129/127	0.96	70	1.041	*	130/127	1.136	70	1.032	*	131/127	0.73	70	[1.064]		129/128	0.535	70	[1.056]		130/128	0.625
402	gi|363730351	PREDICTED: succinate-semialdehyde dehydrogenase, mitochondrial [Gallus gallus]	1802	61570	92	73	23	18	48.6	8.77	5.17	Quantitation summary for protein	129/126	0.912	80	[1.055]		130/126	0.947	80	[1.098]		131/126	0.99	80	[1.100]		129/127	0.758	80	[1.076]		130/127	0.792	80	[1.097]		131/127	0.83	80	[1.095]		129/128	0.963	80	1.04	*	130/128	0.994
403	gi|363745008	PREDICTED: keratin, type II cytoskeletal 8-like, partial [Gallus gallus]	1802	47322	85	72	25	21	54.9	4.97	7.66	Quantitation summary for protein	129/126	0.606	52	1.066	*	130/126	1.216	53	[1.125]		131/126	1.883	53	[1.214]		129/127	0.747	53	[1.058]		130/127	1.522	54	[1.083]		131/127	2.392	54	[1.164]		129/128	0.635	53	[1.052]		130/128	1.279
404	gi|53136666	hypothetical protein RCJMB04_32c11 [Gallus gallus]	1800	30604	87	71	16	14	74.9	4.63	18.85	Quantitation summary for protein	129/126	1.094	55	[1.116]		130/126	0.985	55	[1.143]		131/126	1.085	55	[1.286]		129/127	1.028	55	[1.160]		130/127	0.932	55	1.091	*	131/127	1.029	55	[1.229]		129/128	1.161	55	[1.069]		130/128	1.038
405	gi|118095339	PREDICTED: elongation factor G, mitochondrial [Gallus gallus]	1798	93352	97	82	22	21	29.5	6.76	1.81	Quantitation summary for protein	129/126	1.03	89	[1.047]		130/126	1.004	89	[1.064]		131/126	1.136	88	[1.093]		129/127	0.769	89	[1.073]		130/127	0.755	89	1.04	*	131/127	0.855	88	1.066	*	129/128	0.965	89	[1.022]		130/128	0.935
406	gi|118090250	PREDICTED: septin-11 [Gallus gallus]	1791	60672	83	71	14	13	32.7	6.53	1.58	Quantitation summary for protein	129/126	1.14	23	1.026	*	130/126	1.12	23	1.032	*	131/126	1.214	23	1.045	*	129/127	1.085	22	1.036	*	130/127	1.059	23	1.032	*	131/127	1.15	23	1.043	*	129/128	1.068	23	1.035	*	130/128	1.043
407	gi|53133714	hypothetical protein RCJMB04_19j12 [Gallus gallus]	1789	127764	80	67	24	22	24.7	6.56	1.19	Quantitation summary for protein	129/126	0.924	58	[1.051]		130/126	0.927	58	1.055	*	131/126	0.746	58	[1.103]		129/127	0.856	58	[1.059]		130/127	0.865	58	1.045	*	131/127	0.697	58	[1.098]		129/128	0.749	58	[1.043]		130/128	0.747
408	gi|60098409	hypothetical protein RCJMB04_1m16 [Gallus gallus]	1785	133882	73	64	28	23	31	7.85	1.16	Quantitation summary for protein	129/126	0.981	68	[1.032]		130/126	1.143	68	[1.054]		131/126	0.932	68	[1.084]		129/127	0.961	68	1.048	*	130/127	1.128	68	1.046	*	131/127	0.921	68	[1.063]		129/128	0.912	68	[1.027]		130/128	1.056
409	gi|15077081	actin related protein 3 [Gallus gallus]	1784	53347	92	78	16	14	40.9	5.62	2.96	Quantitation summary for protein	129/126	0.889	82	1.03	*	130/126	0.919	83	1.043	*	131/126	0.95	83	[1.076]		129/127	1.098	83	1.049	*	130/127	1.119	83	[1.031]		131/127	1.16	83	[1.059]		129/128	0.86	83	[1.029]		130/128	0.865
410	gi|53126533	hypothetical protein RCJMB04_1e12 [Gallus gallus]	1784	120754	88	72	31	26	31.2	4.96	1.29	Quantitation summary for protein	129/126	1.371	78	[1.038]		130/126	0.914	77	1.039	*	131/126	0.727	78	[1.085]		129/127	1.673	78	1.049	*	130/127	1.101	78	1.041	*	131/127	0.895	78	[1.076]		129/128	1.312	78	1.025	*	130/128	0.852
411	gi|62972	proteasome C1 subunit [Gallus gallus]	1778	23565	49	47	9	8	52	9	5.43	Quantitation summary for protein	129/126	0.954	48	[1.044]		130/126	0.907	48	1.046	*	131/126	1.156	48	[1.091]		129/127	0.894	46	1.055	*	130/127	0.866	48	1.046	*	131/127	1.106	48	[1.083]		129/128	1.095	48	[1.039]		130/128	1.034
412	gi|444741647	endoplasmic reticulum resident protein 29 precursor [Gallus gallus]	1775	36538	81	58	18	15	54.8	7.63	9.43	Quantitation summary for protein	129/126	1.435	69	[1.071]		130/126	1.026	69	[1.093]		131/126	1.285	69	[1.197]		129/127	1.485	69	[1.110]		130/127	1.07	69	[1.059]		131/127	1.342	69	[1.168]		129/128	1.524	69	[1.041]		130/128	1.083
413	gi|363738612	PREDICTED: constitutive coactivator of PPAR-gamma-like protein 1-like [Gallus gallus]	1772	137414	59	55	16	14	17.6	9.02	0.6	Quantitation summary for protein	129/126	1.139	57	[1.042]		130/126	1.069	57	[1.068]		131/126	0.947	57	[1.088]		129/127	1.195	57	[1.046]		130/127	1.129	57	[1.045]		131/127	0.99	56	1.053		129/128	1.186	57	[1.039]		130/128	1.105
414	gi|53127496	hypothetical protein RCJMB04_2k3 [Gallus gallus]	1771	25387	56	50	11	9	73.5	5.76	4.63	Quantitation summary for protein	129/126	0.793	53	1.06	*	130/126	0.831	53	[1.089]		131/126	1.058	53	[1.148]		129/127	0.868	53	[1.067]		130/127	0.916	53	[1.072]		131/127	1.169	53	[1.129]		129/128	0.918	53	1.055	*	130/128	0.955
415	gi|187609622	RecName: Full=Eukaryotic translation initiation factor 2 subunit 1; AltName: Full=Eukaryotic translation initiation factor 2 subunit alpha; Short=eIF-2-alpha; Short=eIF-2A; Short=eIF-2alpha	1766	41482	68	63	18	17	54.6	5.07	4.83	Quantitation summary for protein	129/126	1.178	66	[1.058]		130/126	0.954	66	[1.041]		131/126	1.056	66	[1.064]		129/127	1.143	66	[1.069]		130/127	0.932	66	1.031	*	131/127	1.034	66	1.055	*	129/128	1.182	66	[1.037]		130/128	0.951
416	gi|363739542	PREDICTED: eukaryotic translation initiation factor 3 subunit B-like [Gallus gallus]	1765	95699	79	70	23	21	35.9	5.12	1.65	Quantitation summary for protein	129/126	1.097	73	[1.039]		130/126	0.973	73	1.051	*	131/126	0.897	73	1.069	*	129/127	1.094	73	1.052	*	130/127	0.977	73	[1.038]		131/127	0.902	73	1.053	*	129/128	1.146	73	[1.025]		130/128	1.01
417	gi|2827444	nucleoside diphosphate kinase [Gallus gallus]	1765	20198	86	68	11	10	76.5	7.72	45.93	Quantitation summary for protein	129/126	1.137	69	[1.103]		130/126	1.022	69	[1.160]		131/126	1.176	69	[1.301]		129/127	0.985	69	[1.101]		130/127	0.891	69	1.104	*	131/127	1.028	69	[1.227]		129/128	1.488	69	1.09	*	130/128	1.329
418	gi|53131982	hypothetical protein RCJMB04_12i19 [Gallus gallus]	1764	48212	109	82	18	13	47.6	8.09	6.29	Quantitation summary for protein	129/126	0.977	89	1.068	*	130/126	0.799	91	[1.131]		131/126	0.752	91	[1.292]		129/127	0.892	91	[1.111]		130/127	0.736	91	[1.128]		131/127	0.695	91	1.285	*	129/128	0.921	91	1.068	*	130/128	0.75
419	gi|50806608	PREDICTED: thioredoxin-like 1 [Gallus gallus]	1756	37086	64	59	12	12	43.6	4.94	3.67	Quantitation summary for protein	129/126	1.186	59	[1.031]		130/126	1.185	59	[1.050]		131/126	1.361	59	[1.128]		129/127	0.871	59	[1.050]		130/127	0.876	59	[1.046]		131/127	1.008	59	[1.131]		129/128	1.247	59	1.021	*	130/128	1.238
420	gi|118103033	PREDICTED: synaptic vesicle membrane protein VAT-1 homolog [Gallus gallus]	1754	48410	43	40	12	11	40.8	6.18	2.28	Quantitation summary for protein	129/126	0.875	40	1.035	*	130/126	0.997	40	[1.045]		131/126	1.161	40	[1.053]		129/127	0.889	40	[1.036]		130/127	1.02	40	[1.058]		131/127	1.19	40	1.046	*	129/128	0.853	40	[1.031]		130/128	0.965
421	gi|363740469	PREDICTED: sarcosine dehydrogenase, mitochondrial [Gallus gallus]	1753	110511	77	65	28	24	37.1	6.42	1.7	Quantitation summary for protein	129/126	1.167	73	[1.041]		130/126	0.971	73	[1.051]		131/126	1.098	73	[1.078]		129/127	1.185	73	[1.057]		130/127	0.994	73	1.04		131/127	1.126	73	1.063	*	129/128	0.946	73	1.031	*	130/128	0.783
422	gi|50767570	PREDICTED: sepiapterin reductase [Gallus gallus]	1746	30423	54	51	11	10	47	5.82	7.84	Quantitation summary for protein	129/126	0.813	51	[1.046]		130/126	0.874	50	[1.060]		131/126	0.785	51	[1.105]		129/127	0.744	51	[1.077]		130/127	0.807	50	[1.057]		131/127	0.724	51	1.081	*	129/128	0.798	51	1.044	*	130/128	0.852
423	gi|53136766	hypothetical protein RCJMB04_33j3 [Gallus gallus]	1738	98171	67	56	18	13	22.7	8.42	0.87	Quantitation summary for protein	129/126	0.774	62	1.032	*	130/126	0.885	62	1.037	*	131/126	0.786	62	1.056	*	129/127	0.808	62	1.029	*	130/127	0.931	62	[1.040]		131/127	0.828	62	1.054	*	129/128	0.489	62	[1.057]		130/128	0.556
424	gi|363735762	PREDICTED: UDP-glucuronosyltransferase 1-9 isoform 1 [Gallus gallus]	1732	68355	109	85	12	10	23.1	8.41	1.44	Quantitation summary for protein	129/126	1.094	11	1.094	*	130/126	2.046	11	[1.396]		131/126	1.239	11	1.515		129/127	1.002	11	1.18		130/127	1.887	11	1.177	*	131/127	1.146	11	1.303		129/128	1.053	11	[1.098]		130/128	1.957
425	gi|53127432	hypothetical protein RCJMB04_2f16 [Gallus gallus]	1724	108525	74	64	21	18	27.8	5.97	1.23	Quantitation summary for protein	129/126	1.065	33	[1.030]		130/126	0.892	33	1.027	*	131/126	0.855	33	1.044	*	129/127	1.126	33	[1.034]		130/127	0.949	33	1.034	*	131/127	0.912	33	1.044	*	129/128	0.951	33	1.02	*	130/128	0.791
426	gi|212813	tropomyosin (CTm4) [Gallus gallus]	1723	41419	152	108	27	19	63.7	4.73	12.62	Quantitation summary for protein	129/126	1	31	[1.027]		130/126	0.838	31	[1.052]		131/126	0.72	31	[1.107]		129/127	1.203	31	[1.042]		130/127	1.016	31	1.036	*	131/127	0.874	31	[1.089]		129/128	0.848	31	1.018	*	130/128	0.706
427	gi|53133917	hypothetical protein RCJMB04_21p3 [Gallus gallus]	1722	72765	88	68	24	18	45.4	6.24	1.88	Quantitation summary for protein	129/126	1.01	68	[1.032]		130/126	0.878	68	[1.064]		131/126	0.968	68	[1.108]		129/127	1.03	68	[1.033]		130/127	0.901	68	[1.040]		131/127	0.997	68	[1.082]		129/128	1.048	68	1.018	*	130/128	0.904
428	gi|60098369	hypothetical protein RCJMB04_1c12 [Gallus gallus]	1720	86197	61	58	18	17	30.5	9.39	1.64	Quantitation summary for protein	129/126	1.089	60	[1.039]		130/126	0.988	60	[1.076]		131/126	0.51	60	[1.142]		129/127	1.437	60	1.054	*	130/127	1.312	60	[1.078]		131/127	0.678	60	[1.112]		129/128	0.917	60	1.026	*	130/128	0.826
429	gi|211107	alpha-tropomyosin [Gallus gallus]	1719	41969	120	99	24	19	54.6	4.7	8.73	Quantitation summary for protein	129/126	---	0	---		130/126	---	0	---		131/126	---	0	---		129/127	---	0	---		130/127	---	0	---		131/127	---	0	---		129/128	---	0	---		130/128	---
430	gi|50754381	PREDICTED: ras-related protein Rab-7a isoform 2 [Gallus gallus]	1719	27943	67	62	16	15	71	6.4	13.89	Quantitation summary for protein	129/126	1.012	67	[1.074]		130/126	0.932	66	[1.056]		131/126	0.677	66	1.095	*	129/127	1.081	67	[1.090]		130/127	1.002	66	[1.049]		131/127	0.73	66	1.091	*	129/128	1.023	67	1.03	*	130/128	0.936
431	gi|468204	actin capping protein beta subunit, isoform 2 [Gallus gallus]	1712	36319	103	80	16	11	39.7	5.69	5.26	Quantitation summary for protein	129/126	0.904	93	[1.060]		130/126	0.911	93	[1.073]		131/126	0.921	93	[1.134]		129/127	1.061	93	[1.090]		130/127	1.077	93	[1.043]		131/127	1.091	93	[1.103]		129/128	0.888	93	[1.025]		130/128	0.889
432	gi|363727685	PREDICTED: early endosome antigen 1 [Gallus gallus]	1711	202830	70	56	31	22	22.4	5.58	0.51	Quantitation summary for protein	129/126	1.057	60	[1.030]		130/126	0.957	60	[1.029]		131/126	0.705	60	[1.056]		129/127	1.223	60	[1.039]		130/127	1.115	60	[1.024]		131/127	0.823	60	1.045	*	129/128	1.036	60	1.02	*	130/128	0.932
433	gi|60099255	hypothetical protein RCJMB04_39i8 [Gallus gallus]	1710	54635	51	48	10	10	25.2	9.25	1.41	Quantitation summary for protein	129/126	0.876	49	[1.049]		130/126	0.949	47	[1.099]		131/126	1.194	48	[1.158]		129/127	0.814	49	1.067	*	130/127	0.882	47	[1.060]		131/127	1.11	48	[1.127]		129/128	0.891	50	1.032	*	130/128	0.954
434	gi|53133522	hypothetical protein RCJMB04_17i9 [Gallus gallus]	1708	101336	96	70	23	20	32.7	5.68	1.44	Quantitation summary for protein	129/126	0.346	70	[1.081]		130/126	0.337	70	[1.104]		131/126	0.349	70	[1.159]		129/127	1.231	70	1.051	*	130/127	1.205	70	1.037	*	131/127	1.253	70	[1.099]		129/128	0.578	70	[1.054]		130/128	0.558
435	gi|118087865	PREDICTED: MOSC domain-containing protein 1, mitochondrial [Gallus gallus]	1707	42470	99	85	20	16	51.2	9	5.03	Quantitation summary for protein	129/126	0.983	87	[1.075]		130/126	1.097	87	[1.076]		131/126	0.608	87	[1.138]		129/127	1.194	87	[1.106]		130/127	1.341	87	[1.072]		131/127	0.745	87	[1.142]		129/128	0.863	86	1.039	*	130/128	0.958
436	gi|53133536	hypothetical protein RCJMB04_17k12 [Gallus gallus]	1705	77928	71	57	19	17	36.1	6.48	1.69	Quantitation summary for protein	129/126	1.275	62	[1.067]		130/126	0.978	62	1.055	*	131/126	0.799	62	1.071	*	129/127	1.346	62	[1.096]		130/127	1.04	62	1.03	*	131/127	0.852	62	1.044	*	129/128	1.074	62	1.027	*	130/128	0.818
437	gi|363737486	PREDICTED: cytochrome c oxidase subunit 5A, mitochondrial isoform 2 [Gallus gallus]	1702	17841	87	70	9	8	39.9	6.3	10.28	Quantitation summary for protein	129/126	0.743	73	[1.052]		130/126	1.068	73	1.072	*	131/126	1.247	73	[1.122]		129/127	0.689	73	1.08	*	130/127	0.997	73	1.05		131/127	1.167	74	[1.091]		129/128	0.839	73	1.039	*	130/128	1.199
438	gi|363735497	PREDICTED: catechol O-methyltransferase domain-containing protein 1 [Gallus gallus]	1695	34973	55	49	12	12	49.6	9	6.34	Quantitation summary for protein	129/126	1.227	51	[1.118]		130/126	0.836	51	[1.119]		131/126	0.862	49	[1.213]		129/127	1.493	50	[1.156]		130/127	1.024	50	[1.104]		131/127	1.058	49	[1.179]		129/128	1.07	51	[1.060]		130/128	0.724
439	gi|313760586	isovaleryl-CoA dehydrogenase, mitochondrial [Gallus gallus]	1693	52345	55	49	12	11	29.6	8.41	1.5	Quantitation summary for protein	129/126	1.058	52	[1.031]		130/126	0.977	52	[1.029]		131/126	0.975	52	[1.054]		129/127	0.891	52	[1.041]		130/127	0.828	52	1.029	*	131/127	0.828	52	[1.052]		129/128	1.03	52	[1.023]		130/128	0.945
440	gi|363744331	PREDICTED: NAD kinase domain-containing protein 1 [Gallus gallus]	1693	54418	49	45	17	17	43.8	8.91	2.64	Quantitation summary for protein	129/126	0.851	45	[1.049]		130/126	1.077	45	1.039	*	131/126	0.982	45	1.071		129/127	0.702	45	[1.054]		130/127	0.894	45	[1.043]		131/127	0.817	45	1.067	*	129/128	0.796	45	1.032	*	130/128	1.002
441	gi|53127328	hypothetical protein RCJMB04_1n4 [Gallus gallus]	1690	39134	70	60	15	12	49	9.74	2.97	Quantitation summary for protein	129/126	1.119	14	1.124	*	130/126	1.301	14	1.104	*	131/126	1.386	14	[1.197]		129/127	0.979	14	1.13		130/127	1.147	14	1.084	*	131/127	1.224	14	[1.176]		129/128	0.769	14	1.031	*	130/128	0.888
442	gi|50729879	PREDICTED: ATP synthase-coupling factor 6, mitochondrial isoform 2 [Gallus gallus]	1681	14873	74	59	10	9	52.3	8.96	25.96	Quantitation summary for protein	129/126	0.698	64	[1.079]		130/126	0.929	65	[1.182]		131/126	1.125	65	[1.482]		129/127	0.621	64	[1.164]		130/127	0.827	65	[1.107]		131/127	1.004	65	[1.442]		129/128	0.808	64	[1.051]		130/128	1.068
443	gi|461496478	40S ribosomal protein S2 [Gallus gallus]	1679	36669	75	69	19	18	57.3	10.25	10.3	Quantitation summary for protein	129/126	1.063	70	[1.061]		130/126	0.996	69	[1.066]		131/126	1.232	70	[1.177]		129/127	0.921	70	[1.083]		130/127	0.869	69	[1.059]		131/127	1.077	70	[1.177]		129/128	1.129	70	1.04	*	130/128	1.051
444	gi|515694	tropomyosin [Gallus gallus]	1677	33572	90	66	27	19	71	4.65	14.45	Quantitation summary for protein	129/126	0.879	24	1.083	*	130/126	1.291	24	1.098	*	131/126	1.157	24	1.186	*	129/127	0.752	24	1.141	*	130/127	1.103	23	1.046	*	131/127	0.998	24	1.154		129/128	0.93	23	1.053	*	130/128	1.362
445	gi|60098425	hypothetical protein RCJMB04_2a4 [Gallus gallus]	1676	79279	77	62	25	22	40.7	6.54	2.66	Quantitation summary for protein	129/126	1.253	57	[1.059]		130/126	1.031	57	[1.062]		131/126	0.936	57	[1.097]		129/127	1.278	57	[1.083]		130/127	1.059	57	1.041	*	131/127	0.963	57	[1.078]		129/128	1.133	57	1.034	*	130/128	0.927
446	gi|84105269	eukaryotic translation initiation factor 5B [Gallus gallus]	1666	179778	67	52	23	18	21.6	5.41	0.51	Quantitation summary for protein	129/126	1.168	64	[1.051]		130/126	1.005	64	[1.049]		131/126	0.958	64	[1.094]		129/127	1.191	64	[1.079]		130/127	1.031	64	[1.033]		131/127	0.986	64	[1.071]		129/128	1.204	64	1.03	*	130/128	1.029
447	gi|50742728	PREDICTED: aldehyde dehydrogenase family 8 member A1 isoform 2 [Gallus gallus]	1656	62103	89	72	22	18	44.4	8.06	3.71	Quantitation summary for protein	129/126	0.949	76	[1.050]		130/126	0.954	76	[1.074]		131/126	0.984	76	[1.134]		129/127	0.866	76	[1.071]		130/127	0.877	76	[1.049]		131/127	0.908	76	[1.107]		129/128	0.858	76	[1.031]		130/128	0.857
448	gi|402296	ribosomal protein S4 [Gallus gallus]	1653	36221	81	54	18	12	59.3	10.16	7.19	Quantitation summary for protein	129/126	1.046	73	[1.076]		130/126	1.168	73	[1.119]		131/126	1.141	73	[1.152]		129/127	0.876	73	[1.098]		130/127	0.984	73	[1.104]		131/127	0.964	73	[1.129]		129/128	1.114	73	[1.065]		130/128	1.236
449	gi|53130428	hypothetical protein RCJMB04_7m18 [Gallus gallus]	1652	17670	58	54	8	8	49.3	6.55	10.61	Quantitation summary for protein	129/126	1.062	54	1.083	*	130/126	0.973	54	[1.057]		131/126	1.056	54	[1.116]		129/127	1.063	54	[1.103]		130/127	0.982	54	1.04	*	131/127	1.068	54	[1.105]		129/128	1.116	54	1.029	*	130/128	1.016
450	gi|118100855	PREDICTED: probable aminopeptidase NPEPL1 [Gallus gallus]	1646	62410	78	58	19	16	44	6.41	2.1	Quantitation summary for protein	129/126	0.818	61	1.035	*	130/126	0.819	61	[1.040]		131/126	0.92	61	[1.057]		129/127	0.943	61	1.038	*	130/127	0.951	61	[1.040]		131/127	1.07	61	[1.050]		129/128	0.893	61	1.032	*	130/128	0.888
451	gi|363742430	PREDICTED: adenylyl cyclase-associated protein 1 [Gallus gallus]	1645	66834	84	65	19	15	34.1	8.2	2.48	Quantitation summary for protein	129/126	0.937	73	1.03	*	130/126	0.825	75	1.049	*	131/126	0.938	75	[1.062]		129/127	1.095	75	1.036	*	130/127	0.971	75	1.032	*	131/127	1.106	75	[1.045]		129/128	0.916	75	[1.021]		130/128	0.802
452	gi|363744728	PREDICTED: endoplasmic reticulum aminopeptidase 1 [Gallus gallus]	1645	120415	79	73	20	19	23.3	5.9	1.01	Quantitation summary for protein	129/126	0.885	75	[1.030]		130/126	0.852	75	[1.030]		131/126	0.743	75	[1.042]		129/127	1.076	75	[1.038]		130/127	1.043	75	[1.026]		131/127	0.912	75	[1.035]		129/128	0.868	75	[1.026]		130/128	0.831
453	gi|10178878	eukaryote initiation factor 2 beta [Gallus gallus]	1644	49525	74	59	17	17	52.7	5.6	3.7	Quantitation summary for protein	129/126	1.175	61	[1.088]		130/126	1.056	61	[1.100]		131/126	0.966	61	[1.183]		129/127	1.094	61	[1.124]		130/127	0.99	61	[1.077]		131/127	0.908	61	[1.158]		129/128	1.158	62	[1.060]		130/128	1.033
454	gi|363727954	PREDICTED: cytoskeleton-associated protein 4 [Gallus gallus]	1644	67387	90	57	25	20	46.3	4.96	2.45	Quantitation summary for protein	129/126	1.107	66	[1.026]		130/126	1.24	66	[1.050]		131/126	1.463	66	[1.059]		129/127	0.998	66	[1.041]		130/127	1.104	65	1.029	*	131/127	1.332	66	1.043	*	129/128	1.187	66	1.026	*	130/128	1.322
455	gi|992993	myosin light chain kinase [Gallus gallus]	1641	251209	69	63	22	20	11.2	5.6	0.33	Quantitation summary for protein	129/126	1.328	66	[1.027]		130/126	1.199	66	[1.028]		131/126	1.102	66	[1.053]		129/127	1.515	66	[1.037]		130/127	1.376	66	[1.031]		131/127	1.268	66	[1.047]		129/128	1.131	66	1.022	*	130/128	1.014
456	gi|363733172	PREDICTED: aminoacyl tRNA synthase complex-interacting multifunctional protein 1 [Gallus gallus]	1640	44404	108	78	19	16	55.8	8.96	4.21	Quantitation summary for protein	129/126	0.898	78	[1.049]		130/126	0.999	78	[1.050]		131/126	1.183	78	[1.094]		129/127	0.898	78	[1.061]		130/127	0.994	77	1.028		131/127	1.194	78	[1.074]		129/128	1.102	78	[1.028]		130/128	1.218
457	gi|381342486	40S ribosomal protein S10 [Gallus gallus]	1639	22106	99	80	13	10	50.9	10.15	11.73	Quantitation summary for protein	129/126	1.123	84	1.057	*	130/126	0.951	84	[1.047]		131/126	1.14	84	[1.081]		129/127	1.029	84	1.056	*	130/127	0.878	84	1.038	*	131/127	1.055	84	[1.078]		129/128	1.146	84	[1.040]		130/128	0.964
458	gi|118098010	PREDICTED: nodal modulator 1 [Gallus gallus]	1638	150018	55	47	19	15	18.9	5.42	0.61	Quantitation summary for protein	129/126	1.046	53	1.041	*	130/126	1.029	53	1.058	*	131/126	1.132	53	1.076	*	129/127	0.94	53	[1.066]		130/127	0.931	53	1.035	*	131/127	1.027	53	[1.059]		129/128	1.065	52	1.024	*	130/128	1.04
459	gi|363743138	PREDICTED: aminopeptidase B [Gallus gallus]	1637	73149	79	69	21	19	40.5	5.15	2.57	Quantitation summary for protein	129/126	0.937	75	[1.030]		130/126	0.974	75	[1.064]		131/126	0.873	75	[1.116]		129/127	0.979	75	1.044	*	130/127	1.024	75	[1.050]		131/127	0.92	75	[1.100]		129/128	0.949	75	1.021	*	130/128	0.979
460	gi|363742034	PREDICTED: phosphopantothenate--cysteine ligase-like [Gallus gallus]	1636	36040	54	45	14	13	54.8	6.47	4.31	Quantitation summary for protein	129/126	0.902	49	1.063	*	130/126	0.923	49	1.056	*	131/126	1.175	49	1.061	*	129/127	0.832	49	[1.074]		130/127	0.857	49	[1.043]		131/127	1.094	49	1.06	*	129/128	1.04	49	[1.053]		130/128	1.056
461	gi|211386	calmodulin [Gallus gallus]	1634	18889	81	63	9	9	49	4.09	25.74	Quantitation summary for protein	129/126	0.919	61	[1.402]		130/126	0.739	59	[1.315]		131/126	0.5	58	1.648	*	129/127	1.062	60	[1.540]		130/127	0.846	59	[1.196]		131/127	0.559	58	1.584	*	129/128	0.871	61	1.15	*	130/128	0.691
462	gi|53129801	hypothetical protein RCJMB04_6c17 [Gallus gallus]	1633	56911	59	52	14	13	34.4	7.11	2.25	Quantitation summary for protein	129/126	1.168	50	[1.095]		130/126	0.876	50	[1.076]		131/126	0.843	50	[1.160]		129/127	1.221	50	[1.138]		130/127	0.922	50	1.04	*	131/127	0.89	50	[1.124]		129/128	1.093	50	[1.043]		130/128	0.814
463	gi|53136800	hypothetical protein RCJMB04_34b10 [Gallus gallus]	1631	89903	78	60	24	19	38.8	6.1	2.03	Quantitation summary for protein	129/126	1.464	64	[1.090]		130/126	0.974	64	[1.064]		131/126	0.953	64	[1.150]		129/127	1.555	64	[1.133]		130/127	1.042	64	1.043	*	131/127	1.021	64	1.113		129/128	1.172	64	1.035	*	130/128	0.775
464	gi|3915686	RecName: Full=Farnesyl pyrophosphate synthase; Short=FPP synthase; Short=FPS; AltName: Full=(2E,6E)-farnesyl diphosphate synthase; AltName: Full=Dimethylallyltranstransferase; AltName: Full=Farnesyl diphosphate synthase; AltName: Full=Geranyltranstr	1630	48770	67	60	20	15	43.6	6.16	4.49	Quantitation summary for protein	129/126	1.696	63	[1.073]		130/126	1.178	63	1.086	*	131/126	0.884	62	[1.139]		129/127	1.508	63	[1.105]		130/127	1.055	63	[1.049]		131/127	0.792	62	[1.111]		129/128	2.139	63	1.067	*	130/128	1.477
465	gi|53135033	hypothetical protein RCJMB04_24e8 [Gallus gallus]	1627	48050	72	57	19	16	46.3	6.15	5	Quantitation summary for protein	129/126	0.83	66	[1.051]		130/126	0.968	66	[1.063]		131/126	0.877	66	1.126	*	129/127	0.758	66	1.064	*	130/127	0.89	66	[1.047]		131/127	0.809	66	1.112	*	129/128	0.777	66	[1.038]		130/128	0.9
466	gi|310772238	glutathione S-transferase kappa 1 [Gallus gallus]	1626	28832	69	58	14	10	63.4	8.89	12.74	Quantitation summary for protein	129/126	0.919	64	1.042	*	130/126	1.018	64	[1.049]		131/126	1.188	64	[1.086]		129/127	0.779	64	1.055	*	130/127	0.869	64	1.041	*	131/127	1.016	64	[1.072]		129/128	0.783	64	1.036	*	130/128	0.863
467	gi|118082453	PREDICTED: acyl-CoA synthetase short-chain family member 3, mitochondrial [Gallus gallus]	1625	84672	69	63	21	20	36.8	8.79	2.12	Quantitation summary for protein	129/126	0.862	66	[1.069]		130/126	1.036	66	[1.060]		131/126	1.043	66	1.061	*	129/127	0.71	66	[1.075]		130/127	0.859	66	[1.051]		131/127	0.867	66	1.05	*	129/128	0.959	66	[1.052]		130/128	1.145
468	gi|363728070	PREDICTED: tetratricopeptide repeat protein 38-like [Gallus gallus]	1623	59337	76	54	18	15	44.4	5.84	4.04	Quantitation summary for protein	129/126	1.385	34	1.064	*	130/126	0.566	34	[1.114]		131/126	0.478	34	[1.224]		129/127	1.723	34	[1.106]		130/127	0.708	34	1.081	*	131/127	0.6	34	[1.188]		129/128	1.017	34	1.059		130/128	0.412
469	gi|135767	RecName: Full=Thioredoxin; Short=Trx	1622	15186	79	65	9	7	56.2	5.1	29.82	Quantitation summary for protein	129/126	1.035	70	[1.089]		130/126	1.48	70	1.059	*	131/126	1.577	70	[1.159]		129/127	0.772	70	[1.100]		130/127	1.112	70	1.048	*	131/127	1.188	70	[1.149]		129/128	1.218	70	[1.044]		130/128	1.731
470	gi|104728	Ig light chain precursor V-J region - chicken (fragment)	1622	25061	91	85	5	5	17.8	5.36	1.12	Quantitation summary for protein	129/126	---	0	---		130/126	---	0	---		131/126	---	0	---		129/127	---	0	---		130/127	---	0	---		131/127	---	0	---		129/128	---	0	---		130/128	---
471	gi|212058	Ig light chain, partial [Gallus gallus]	1622	25931	92	85	5	5	17	5.34	1.07	Quantitation summary for protein	129/126	---	0	---		130/126	---	0	---		131/126	---	0	---		129/127	---	0	---		130/127	---	0	---		131/127	---	0	---		129/128	---	0	---		130/128	---
472	gi|363732267	PREDICTED: LOW QUALITY PROTEIN: erythrocyte membrane protein band 4.1-like 2 [Gallus gallus]	1621	157355	79	70	23	20	23.5	4.98	0.67	Quantitation summary for protein	129/126	1.039	74	1.025	*	130/126	0.96	74	1.035	*	131/126	0.898	74	1.062	*	129/127	1.17	74	[1.038]		130/127	1.09	74	1.025	*	131/127	1.022	74	[1.046]		129/128	1.051	74	1.022	*	130/128	0.965
473	gi|49339399	signal transducer and activator of transcription 3 [Gallus gallus]	1614	99859	78	56	18	15	25.7	5.94	1.31	Quantitation summary for protein	129/126	0.65	54	[1.126]		130/126	0.512	54	[1.120]		131/126	0.343	54	1.148	*	129/127	1.618	54	1.086	*	130/127	1.284	54	1.081	*	131/127	0.862	54	1.089	*	129/128	0.886	54	[1.089]		130/128	0.694
474	gi|53136558	hypothetical protein RCJMB04_30l19 [Gallus gallus]	1611	29754	59	51	13	13	61.3	5.6	6.5	Quantitation summary for protein	129/126	0.886	57	1.091	*	130/126	0.796	57	[1.084]		131/126	0.75	57	[1.154]		129/127	0.937	57	1.13	*	130/127	0.848	57	1.064	*	131/127	0.8	57	[1.122]		129/128	0.895	56	1.037	*	130/128	0.8
475	gi|17221616	nuclear protein matrin 3 [Gallus gallus]	1610	117893	82	59	23	20	28.6	5.79	0.98	Quantitation summary for protein	129/126	0.875	69	[1.038]		130/126	0.877	69	[1.076]		131/126	0.577	69	1.118	*	129/127	1.194	69	[1.079]		130/127	1.205	69	[1.037]		131/127	0.794	69	[1.076]		129/128	0.965	69	1.028	*	130/128	0.961
476	gi|363745002	PREDICTED: proliferation-associated protein 2G4 [Gallus gallus]	1605	56605	62	56	14	14	35.1	6.9	1.93	Quantitation summary for protein	129/126	1.102	60	1.028	*	130/126	0.982	61	[1.087]		131/126	0.969	61	[1.146]		129/127	1.028	61	[1.050]		130/127	0.925	61	[1.045]		131/127	0.915	61	[1.100]		129/128	1.074	61	[1.024]		130/128	0.952
477	gi|314122169	neutral alpha-glucosidase C [Gallus gallus]	1604	120862	85	67	24	20	26.8	5.96	1	Quantitation summary for protein	129/126	0.856	75	[1.057]		130/126	1.013	75	[1.051]		131/126	1.07	75	[1.089]		129/127	0.768	75	[1.081]		130/127	0.916	75	1.028	*	131/127	0.969	75	[1.068]		129/128	0.833	75	[1.029]		130/128	0.979
478	gi|60098741	hypothetical protein RCJMB04_7k16 [Gallus gallus]	1598	59671	85	65	23	15	46.8	8.76	2.82	Quantitation summary for protein	129/126	0.9	73	1.053	*	130/126	1.055	73	[1.057]		131/126	0.998	73	[1.085]		129/127	0.837	72	1.075	*	130/127	0.966	73	[1.037]		131/127	0.916	73	[1.064]		129/128	0.912	73	1.029	*	130/128	1.061
479	gi|53136692	hypothetical protein RCJMB04_32i2 [Gallus gallus]	1597	19413	63	46	10	7	47	10.07	10	Quantitation summary for protein	129/126	1.062	49	1.102	*	130/126	0.94	50	[1.121]		131/126	1.006	50	[1.199]		129/127	1.026	49	1.118		130/127	0.902	50	[1.096]		131/127	0.967	50	1.173		129/128	1.203	49	[1.082]		130/128	1.036
480	gi|363743351	PREDICTED: 26S protease regulatory subunit 8 [Gallus gallus]	1597	54335	63	54	21	17	56.4	7.11	3.61	Quantitation summary for protein	129/126	1.16	50	1.056	*	130/126	0.977	50	1.062	*	131/126	1.088	50	[1.102]		129/127	1.138	50	[1.083]		130/127	0.966	50	[1.044]		131/127	1.078	50	[1.080]		129/128	1.19	50	[1.033]		130/128	0.996
481	gi|132626770	heterogeneous nuclear ribonucleoprotein R [Gallus gallus]	1595	81574	74	65	21	19	37.3	8.4	2.14	Quantitation summary for protein	129/126	0.869	62	1.047	*	130/126	0.889	62	[1.047]		131/126	0.821	62	[1.131]		129/127	0.959	62	1.056	*	130/127	0.987	62	1.05	*	131/127	0.914	62	[1.131]		129/128	0.91	62	1.032	*	130/128	0.925
482	gi|118084001	PREDICTED: peroxiredoxin-4 isoform 2 [Gallus gallus]	1587	33510	94	75	14	13	60.4	6.25	6.98	Quantitation summary for protein	129/126	1.222	82	[1.055]		130/126	1.069	82	[1.051]		131/126	1.169	82	1.082	*	129/127	1.207	82	[1.079]		130/127	1.063	82	[1.031]		131/127	1.166	82	[1.063]		129/128	1.514	82	1.034	*	130/128	1.316
483	gi|1922282	vitronectin [Gallus gallus]	1584	56470	62	50	11	10	23	5.17	0.97	Quantitation summary for protein	129/126	0.933	52	[1.041]		130/126	0.921	52	1.057	*	131/126	0.658	52	[1.152]		129/127	0.855	52	[1.069]		130/127	0.849	52	1.045	*	131/127	0.608	52	[1.132]		129/128	0.934	52	1.035	*	130/128	0.916
484	gi|118090053	PREDICTED: hydroxyacyl-coenzyme A dehydrogenase, mitochondrial [Gallus gallus]	1582	41561	124	79	19	13	57.5	8.68	9.75	Quantitation summary for protein	129/126	0.725	95	1.08	*	130/126	1.078	95	[1.131]		131/126	1.517	95	[1.191]		129/127	0.551	96	[1.125]		130/127	0.826	97	[1.093]		131/127	1.165	97	1.141	*	129/128	0.762	96	[1.069]		130/128	1.127
485	gi|60098571	hypothetical protein RCJMB04_3m24 [Gallus gallus]	1581	123578	87	64	23	20	24.6	5.23	1.08	Quantitation summary for protein	129/126	1.36	66	[1.063]		130/126	0.992	66	[1.035]		131/126	0.781	66	1.08	*	129/127	1.594	66	[1.092]		130/127	1.17	66	1.028	*	131/127	0.924	66	1.065	*	129/128	1.163	66	[1.036]		130/128	0.843
486	gi|310772215	phosphatidylethanolamine-binding protein 1 [Gallus gallus]	1581	24781	63	59	11	11	73.3	6.96	11.59	Quantitation summary for protein	129/126	0.859	62	[1.064]		130/126	1.314	62	1.089	*	131/126	1.75	62	[1.160]		129/127	0.723	62	1.087	*	130/127	1.114	62	1.065	*	131/127	1.488	62	[1.148]		129/128	0.889	62	[1.030]		130/128	1.352
487	gi|363743812	PREDICTED: guanidinoacetate N-methyltransferase [Gallus gallus]	1578	26019	61	55	7	7	34.3	5.56	3.27	Quantitation summary for protein	129/126	0.979	55	1.152		130/126	1.365	55	1.159	*	131/126	0.76	55	1.235	*	129/127	0.714	55	1.204	*	130/127	1.003	55	1.162		131/127	0.56	55	1.3	*	129/128	1.157	55	[1.109]		130/128	1.603
488	gi|363730968	PREDICTED: hydroxyacid-oxoacid transhydrogenase, mitochondrial [Gallus gallus]	1577	55187	69	60	13	12	44.8	6.8	3.02	Quantitation summary for protein	129/126	0.747	66	[1.047]		130/126	0.974	66	[1.033]		131/126	1.248	66	[1.049]		129/127	0.593	66	1.067	*	130/127	0.778	66	1.028	*	131/127	1	66	[1.041]		129/128	0.671	66	1.035	*	130/128	0.895
489	gi|363746976	PREDICTED: T-complex protein 1 subunit gamma [Gallus gallus]	1576	18807	48	47	7	7	58.3	6.43	10.92	Quantitation summary for protein	129/126	1.098	48	[1.044]		130/126	1.162	48	[1.071]		131/126	1.262	48	[1.058]		129/127	0.938	48	[1.047]		130/127	0.999	48	1.052		131/127	1.088	48	[1.055]		129/128	1.08	47	1.04	*	130/128	1.129
490	gi|363727431	PREDICTED: probable 2-oxoglutarate dehydrogenase E1 component DHKTD1, mitochondrial [Gallus gallus]	1571	113995	69	55	18	14	24.5	6.31	0.66	Quantitation summary for protein	129/126	1.251	60	[1.063]		130/126	0.957	60	[1.102]		131/126	1.168	60	[1.187]		129/127	1.056	60	[1.077]		130/127	0.813	60	[1.061]		131/127	0.995	60	[1.138]		129/128	1.087	60	[1.047]		130/128	0.826
491	gi|118089176	PREDICTED: cytochrome P450 2K1-like [Gallus gallus]	1568	65216	77	66	24	20	44.7	8.79	3.16	Quantitation summary for protein	129/126	0.633	55	1.046	*	130/126	1.123	55	[1.061]		131/126	0.567	55	[1.101]		129/127	0.752	55	1.047	*	130/127	1.343	55	[1.053]		131/127	0.679	55	[1.079]		129/128	0.56	55	1.048	*	130/128	0.987
492	gi|53133117	hypothetical protein RCJMB04_14i9 [Gallus gallus]	1567	30039	47	39	12	9	60.6	4.76	5.61	Quantitation summary for protein	129/126	0.996	40	1.031		130/126	0.814	41	1.068	*	131/126	1.008	41	[1.134]		129/127	1.053	41	1.047	*	130/127	0.867	41	1.056	*	131/127	1.076	41	[1.121]		129/128	1.083	41	1.039	*	130/128	0.88
493	gi|53132103	hypothetical protein RCJMB04_12m17 [Gallus gallus]	1567	55560	51	42	12	10	32.1	7.94	1.82	Quantitation summary for protein	129/126	0.961	47	1.025	*	130/126	1.019	47	1.056	*	131/126	0.948	47	[1.115]		129/127	1	47	[1.048]		130/127	1.067	47	1.043	*	131/127	0.995	47	1.102		129/128	0.811	47	[1.031]		130/128	0.854
494	gi|363735702	PREDICTED: UDP-glucuronosyltransferase 1-1-like isoform 1 [Gallus gallus]	1560	68701	105	78	11	9	19.9	8.13	1.21	Quantitation summary for protein	129/126	1.514	8	[1.066]		130/126	0.685	8	1.12	*	131/126	0.405	8	1.285	*	129/127	2.159	8	1.086	*	130/127	0.984	8	1.096		131/127	0.583	8	1.266	*	129/128	1.187	8	1.062	*	130/128	0.534
495	gi|148224812	NADH dehydrogenase [ubiquinone] 1 alpha subcomplex subunit 5 [Gallus gallus]	1557	15273	56	51	10	8	81.9	6.59	23.64	Quantitation summary for protein	129/126	0.818	50	1.086	*	130/126	1.144	51	[1.118]		131/126	1.399	51	[1.162]		129/127	0.687	50	[1.146]		130/127	0.949	51	[1.074]		131/127	1.163	51	[1.123]		129/128	0.897	50	1.063	*	130/128	1.213
496	gi|53134922	hypothetical protein RCJMB04_24a4 [Gallus gallus]	1556	28912	52	45	7	7	34.7	6.37	5.4	Quantitation summary for protein	129/126	1.119	49	[1.064]		130/126	1.16	48	1.077	*	131/126	1.374	49	[1.165]		129/127	1.153	49	1.089	*	130/127	1.195	49	1.066	*	131/127	1.43	49	1.117	*	129/128	1.142	49	[1.066]		130/128	1.175
497	gi|118094253	PREDICTED: nucleoprotein TPR [Gallus gallus]	1553	307233	104	74	41	30	19.8	4.95	0.42	Quantitation summary for protein	129/126	0.919	79	[1.042]		130/126	1.034	79	1.024	*	131/126	0.827	79	[1.056]		129/127	1.052	79	[1.047]		130/127	1.192	79	1.022	*	131/127	0.951	78	1.045	*	129/128	0.896	79	[1.033]		130/128	1.001
498	gi|53127744	hypothetical protein RCJMB04_3d14 [Gallus gallus]	1551	59770	72	62	13	12	30.5	6.67	1.36	Quantitation summary for protein	129/126	0.871	13	1.044	*	130/126	0.858	13	1.033	*	131/126	0.729	13	1.092	*	129/127	0.961	13	1.067	*	130/127	0.953	13	1.032	*	131/127	0.811	13	1.08	*	129/128	0.828	13	1.039	*	130/128	0.81
499	gi|356460917	40S ribosomal protein S8 [Gallus gallus]	1547	31788	51	48	9	8	46.2	10.32	3.92	Quantitation summary for protein	129/126	1.087	49	[1.052]		130/126	0.868	49	[1.052]		131/126	0.8	49	[1.075]		129/127	1.086	49	1.051	*	130/127	0.873	49	[1.052]		131/127	0.807	49	1.065	*	129/128	1.067	49	[1.046]		130/128	0.846
500	gi|444299628	nascent polypeptide-associated complex alpha subunit [Gallus gallus]	1538	27274	38	35	6	5	35.8	4.56	2.98	Quantitation summary for protein	129/126	0.976	37	1.037	*	130/126	0.977	37	1.033	*	131/126	1.296	37	[1.057]		129/127	0.884	37	[1.044]		130/127	0.891	37	1.028	*	131/127	1.185	37	[1.048]		129/128	1.205	37	[1.028]		130/128	1.199
501	gi|50732227	PREDICTED: xylulose kinase [Gallus gallus]	1537	65527	78	64	19	19	36.5	6.09	2.94	Quantitation summary for protein	129/126	1.3	71	[1.052]		130/126	0.991	71	[1.045]		131/126	1.158	71	[1.073]		129/127	1.35	71	[1.069]		130/127	1.035	71	[1.032]		131/127	1.213	71	[1.064]		129/128	1.413	71	1.038	*	130/128	1.069
502	gi|363743385	PREDICTED: LOW QUALITY PROTEIN: 26S proteasome non-ATPase regulatory subunit 11 [Gallus gallus]	1531	63139	50	42	17	14	34.5	5.96	1.9	Quantitation summary for protein	129/126	1.073	42	1.034	*	130/126	1.044	45	1.061	*	131/126	0.865	45	[1.112]		129/127	0.932	45	[1.074]		130/127	0.966	45	[1.042]		131/127	0.803	45	[1.101]		129/128	1.16	45	1.031	*	130/128	1.187
503	gi|118092708	PREDICTED: protein transport protein Sec31B isoform 1 [Gallus gallus]	1526	145893	61	55	22	19	20.3	6.24	0.63	Quantitation summary for protein	129/126	0.894	55	[1.045]		130/126	0.967	55	[1.038]		131/126	0.748	55	[1.094]		129/127	0.979	55	[1.045]		130/127	1.066	55	1.035	*	131/127	0.826	55	[1.092]		129/128	0.931	55	1.03	*	130/128	1
504	gi|50736203	PREDICTED: endoplasmic reticulum resident protein 44 [Gallus gallus]	1524	52101	67	61	17	15	46.3	5.37	2.21	Quantitation summary for protein	129/126	1.103	63	1.036	*	130/126	0.775	63	[1.081]		131/126	0.834	63	[1.153]		129/127	1.175	63	[1.080]		130/127	0.831	63	1.052	*	131/127	0.896	63	[1.121]		129/128	1.176	62	1.034	*	130/128	0.821
505	gi|53130538	hypothetical protein RCJMB04_8j15 [Gallus gallus]	1523	92024	48	43	17	14	26.5	9.22	1.01	Quantitation summary for protein	129/126	1.307	45	[1.027]		130/126	0.977	45	1.042	*	131/126	0.779	45	[1.099]		129/127	1.366	45	[1.036]		130/127	1.028	45	1.037	*	131/127	0.822	45	[1.096]		129/128	1.169	45	[1.031]		130/128	0.868
506	gi|50748528	PREDICTED: maleylacetoacetate isomerase isoform 3 [Gallus gallus]	1523	27170	58	55	11	10	59.1	8.87	6.14	Quantitation summary for protein	129/126	1.132	57	1.056	*	130/126	0.808	57	[1.079]		131/126	0.838	57	[1.131]		129/127	1.078	57	[1.104]		130/127	0.775	57	1.046	*	131/127	0.806	57	[1.087]		129/128	1.1	57	[1.034]		130/128	0.781
507	gi|118101426	PREDICTED: prenylcysteine oxidase [Gallus gallus]	1520	62389	52	48	11	10	30.1	7.21	1.52	Quantitation summary for protein	129/126	0.955	50	[1.071]		130/126	0.965	50	[1.066]		131/126	1.275	50	[1.088]		129/127	0.838	50	1.074	*	130/127	0.853	50	1.053	*	131/127	1.13	50	[1.090]		129/128	0.956	50	[1.064]		130/128	0.96
508	gi|363735638	PREDICTED: delta-1-pyrroline-5-carboxylate synthase [Gallus gallus]	1520	97370	77	71	30	27	35.9	6.74	2.63	Quantitation summary for protein	129/126	0.972	71	1.049	*	130/126	0.91	72	[1.056]		131/126	0.838	72	[1.091]		129/127	0.953	71	1.064	*	130/127	0.897	72	1.036	*	131/127	0.827	72	1.074	*	129/128	0.962	71	[1.035]		130/128	0.894
509	gi|53131721	hypothetical protein RCJMB04_12b19 [Gallus gallus]	1518	128316	68	55	23	17	27.3	6.45	0.74	Quantitation summary for protein	129/126	1.059	60	[1.037]		130/126	1.146	60	[1.072]		131/126	1.047	60	[1.114]		129/127	0.931	60	[1.044]		130/127	1.014	60	[1.040]		131/127	0.929	60	[1.082]		129/128	1.022	60	[1.018]		130/128	1.099
510	gi|363736280	PREDICTED: sterol 26-hydroxylase, mitochondrial [Gallus gallus]	1515	63831	67	51	20	16	39	9.43	2.17	Quantitation summary for protein	129/126	1.062	56	1.037	*	130/126	1.035	56	[1.049]		131/126	0.731	56	[1.068]		129/127	1.1	56	1.049	*	130/127	1.078	56	1.038	*	131/127	0.763	56	1.06	*	129/128	1.04	56	1.025	*	130/128	1.006
511	gi|790617	A1 isoform of vacuolar H+-ATPase subunit A [Gallus gallus]	1513	76796	60	49	22	18	40	5.51	2.09	Quantitation summary for protein	129/126	1.127	55	[1.047]		130/126	0.834	55	[1.061]		131/126	0.817	55	[1.107]		129/127	1.22	55	[1.058]		130/127	0.909	55	1.046	*	131/127	0.893	55	[1.087]		129/128	1.064	55	1.026	*	130/128	0.783
512	gi|363729624	PREDICTED: extended synaptotagmin-2 [Gallus gallus]	1499	97939	58	50	19	16	33	7.71	1.13	Quantitation summary for protein	129/126	1.184	48	1.065	*	130/126	1.046	48	1.115	*	131/126	0.947	48	1.119	*	129/127	1.244	48	1.125	*	130/127	1.107	48	1.082	*	131/127	1.005	48	1.085		129/128	1.015	48	[1.039]		130/128	0.891
513	gi|313760551	S-adenosylmethionine synthase isoform type-1 [Gallus gallus]	1499	50197	73	54	14	10	36.1	6.28	2.35	Quantitation summary for protein	129/126	1.488	62	[1.053]		130/126	1.007	62	1.07		131/126	1.333	62	[1.105]		129/127	1.57	62	[1.094]		130/127	1.07	62	1.045	*	131/127	1.42	62	[1.093]		129/128	1.248	62	1.033	*	130/128	0.839
514	gi|53134071	hypothetical protein RCJMB04_22h21 [Gallus gallus]	1497	74329	64	52	17	12	27.4	5.32	1.48	Quantitation summary for protein	129/126	1.272	55	[1.043]		130/126	1.078	55	1.053	*	131/126	1.112	55	1.09	*	129/127	1.206	55	[1.059]		130/127	1.029	55	1.038	*	131/127	1.064	55	1.07	*	129/128	1.186	55	[1.030]		130/128	0.998
515	gi|212807	alpha-tropomyosin (smooth muscle) [Gallus gallus]	1497	40911	84	59	28	19	69	4.68	8.5	Quantitation summary for protein	129/126	---	0	---		130/126	---	0	---		131/126	---	0	---		129/127	---	0	---		130/127	---	0	---		131/127	---	0	---		129/128	---	0	---		130/128	---
516	gi|6065857	dynactin [Gallus gallus]	1494	159940	50	43	20	16	19	6.15	0.44	Quantitation summary for protein	129/126	1.122	45	[1.038]		130/126	0.86	45	[1.051]		131/126	0.699	45	[1.132]		129/127	1.249	45	1.056	*	130/127	0.964	45	1.041	*	131/127	0.785	45	1.105	*	129/128	1.062	44	1.028	*	130/128	0.81
517	gi|60098883	hypothetical protein RCJMB04_14f6 [Gallus gallus]	1493	51981	68	50	18	15	49.4	7.86	3.11	Quantitation summary for protein	129/126	1.031	53	[1.198]		130/126	1.145	53	1.133	*	131/126	1.268	53	1.19	*	129/127	0.908	53	[1.235]		130/127	1.015	53	[1.092]		131/127	1.127	53	1.145	*	129/128	1.102	54	[1.105]		130/128	1.216
518	gi|50746549	PREDICTED: estradiol 17-beta-dehydrogenase 11 isoform 2 [Gallus gallus]	1490	37716	84	66	13	12	34.8	8.52	8.69	Quantitation summary for protein	129/126	1.175	79	[1.038]		130/126	1.174	79	[1.039]		131/126	0.759	79	[1.101]		129/127	1.25	79	[1.044]		130/127	1.257	79	[1.039]		131/127	0.814	79	[1.095]		129/128	1.116	79	1.022	*	130/128	1.108
519	gi|50806228	PREDICTED: erlin-2 [Gallus gallus]	1489	45239	53	48	11	10	34.8	5.52	2.31	Quantitation summary for protein	129/126	1.131	43	1.029	*	130/126	1.027	43	[1.028]		131/126	0.94	43	[1.045]		129/127	1.306	43	1.038	*	130/127	1.195	43	1.025	*	131/127	1.095	43	1.03	*	129/128	1.039	43	1.024	*	130/128	0.938
520	gi|363730964	PREDICTED: aspartyl/asparaginyl beta-hydroxylase [Gallus gallus]	1488	99491	79	70	23	21	39	4.78	1.64	Quantitation summary for protein	129/126	1.387	78	[1.045]		130/126	1.03	78	[1.061]		131/126	0.998	74	[1.074]		129/127	1.532	78	[1.073]		130/127	1.145	78	[1.050]		131/127	1.109	74	[1.055]		129/128	1.293	78	[1.034]		130/128	0.954
521	gi|53128989	hypothetical protein RCJMB04_5f14 [Gallus gallus]	1486	24189	89	61	17	11	73.9	8.09	27.96	Quantitation summary for protein	129/126	0.901	69	1.048	*	130/126	0.758	69	[1.097]		131/126	0.569	68	1.174	*	129/127	1.189	69	1.059	*	130/127	1.007	69	[1.071]		131/127	0.758	68	[1.143]		129/128	0.832	69	[1.034]		130/128	0.696
522	gi|3688784	homogenin [Gallus gallus]	1484	98266	68	54	20	15	25.2	5.93	1.2	Quantitation summary for protein	129/126	0.972	60	1.043	*	130/126	0.991	60	[1.043]		131/126	1.018	60	[1.080]		129/127	0.972	60	1.055	*	130/127	0.998	60	[1.030]		131/127	1.027	60	[1.066]		129/128	0.8	60	[1.030]		130/128	0.81
523	gi|53133287	hypothetical protein RCJMB04_15c3 [Gallus gallus]	1483	28539	50	46	11	10	59.1	8.86	5.53	Quantitation summary for protein	129/126	1.236	46	[1.065]		130/126	1.034	46	[1.062]		131/126	0.786	46	1.099	*	129/127	1.477	46	[1.091]		130/127	1.244	46	1.041	*	131/127	0.948	46	1.062	*	129/128	1.267	46	[1.042]		130/128	1.053
524	gi|60099067	hypothetical protein RCJMB04_22h1 [Gallus gallus]	1472	98844	84	68	26	25	33.7	6.36	1.66	Quantitation summary for protein	129/126	1.178	75	[1.048]		130/126	0.934	75	1.043	*	131/126	0.811	75	[1.081]		129/127	1.308	75	[1.066]		130/127	1.044	75	[1.032]		131/127	0.909	75	[1.073]		129/128	1.103	75	1.024	*	130/128	0.869
525	gi|53132504	hypothetical protein RCJMB04_13i11 [Gallus gallus]	1469	104985	59	51	24	20	32.8	6.37	1.22	Quantitation summary for protein	129/126	1.043	53	[1.066]		130/126	0.865	52	1.056	*	131/126	0.587	53	1.122	*	129/127	1.168	53	[1.088]		130/127	0.977	52	1.044	*	131/127	0.663	53	[1.108]		129/128	1.049	53	1.029	*	130/128	0.874
526	gi|118092977	PREDICTED: xaa-Pro aminopeptidase 1 [Gallus gallus]	1467	79077	62	55	19	14	30.3	5.79	1.55	Quantitation summary for protein	129/126	1.034	59	1.032	*	130/126	1.065	59	1.048	*	131/126	0.957	59	[1.091]		129/127	0.954	59	[1.055]		130/127	0.99	59	[1.037]		131/127	0.892	59	[1.081]		129/128	1.006	59	1.022	*	130/128	1.03
527	gi|118096783	PREDICTED: isoleucyl-tRNA synthetase, cytoplasmic [Gallus gallus]	1466	166668	82	62	28	24	22.6	6.14	0.75	Quantitation summary for protein	129/126	1.236	72	[1.031]		130/126	1.072	72	[1.046]		131/126	0.801	72	1.077	*	129/127	1.329	72	[1.048]		130/127	1.161	72	[1.033]		131/127	0.869	72	[1.063]		129/128	1.118	72	[1.018]		130/128	0.964
528	gi|363729697	PREDICTED: multidrug resistance protein 1 [Gallus gallus]	1465	164380	56	44	14	11	11.9	8.82	0.32	Quantitation summary for protein	129/126	---	0	---		130/126	---	0	---		131/126	---	0	---		129/127	---	0	---		130/127	---	0	---		131/127	---	0	---		129/128	---	0	---		130/128	---
529	gi|288871991	LIM and SH3 protein 1 [Gallus gallus]	1462	34848	49	44	10	7	36	7.04	1.98	Quantitation summary for protein	129/126	0.927	47	1.029	*	130/126	0.809	47	[1.130]		131/126	0.658	46	1.165	*	129/127	1.115	47	[1.065]		130/127	0.98	47	1.081		131/127	0.798	46	1.118	*	129/128	0.87	47	[1.024]		130/128	0.754
530	gi|2558539	ubiquitin-ribosomal protein fusion protein [Gallus gallus]	1459	19140	92	68	8	6	50	9.87	3.32	Quantitation summary for protein	129/126	0.997	18	1.051		130/126	0.935	18	[1.072]		131/126	1.043	18	[1.071]		129/127	1.098	18	1.06	*	130/127	1.036	18	1.047	*	131/127	1.159	18	1.054	*	129/128	1.176	18	1.035	*	130/128	1.096
531	gi|44969305	ribosomal protein L19 [Gallus gallus]	1453	27341	50	44	7	6	29.9	11.57	2.16	Quantitation summary for protein	129/126	1.041	47	[1.123]		130/126	1.038	47	1.062	*	131/126	1.016	47	[1.171]		129/127	0.99	47	[1.165]		130/127	0.994	47	[1.048]		131/127	0.975	47	[1.180]		129/128	1.107	47	1.057	*	130/128	1.097
532	gi|63524	unnamed protein product [Gallus gallus]	1451	58129	64	49	14	13	32.7	6.84	2.01	Quantitation summary for protein	129/126	0.646	39	1.075	*	130/126	0.627	39	1.113	*	131/126	0.659	39	[1.283]		129/127	0.869	39	1.074	*	130/127	0.849	39	[1.075]		131/127	0.893	39	[1.237]		129/128	0.891	39	[1.054]		130/128	0.859
533	gi|18873599	flavin-containing monooxygenase 3 [Gallus gallus]	1451	68657	57	47	19	16	37.3	8.29	1.93	Quantitation summary for protein	129/126	0.965	51	1.024	*	130/126	0.927	51	1.043	*	131/126	0.561	51	1.089	*	129/127	1.46	52	1.054	*	130/127	1.414	51	1.05	*	131/127	0.859	52	[1.082]		129/128	0.785	51	1.028	*	130/128	0.75
534	gi|60098969	hypothetical protein RCJMB04_17g4 [Gallus gallus]	1451	61492	60	54	15	14	29.1	6.09	2.49	Quantitation summary for protein	129/126	0.716	55	1.068	*	130/126	0.93	55	[1.067]		131/126	1.031	55	[1.108]		129/127	0.59	55	[1.086]		130/127	0.772	55	[1.056]		131/127	0.857	55	[1.110]		129/128	0.85	55	[1.047]		130/128	1.097
535	gi|118098116	PREDICTED: 4-aminobutyrate aminotransferase, mitochondrial [Gallus gallus]	1446	64591	61	48	17	15	42.4	8.67	1.98	Quantitation summary for protein	129/126	0.953	57	1.036	*	130/126	1.207	57	1.041	*	131/126	0.892	57	[1.056]		129/127	0.747	57	[1.059]		130/127	0.953	57	1.03	*	131/127	0.706	57	[1.054]		129/128	0.994	57	[1.033]		130/128	1.25
536	gi|53130464	hypothetical protein RCJMB04_8a2 [Gallus gallus]	1446	39137	38	38	8	8	26.6	9.07	1.65	Quantitation summary for protein	129/126	1.394	38	1.04	*	130/126	1.295	38	1.04	*	131/126	0.74	38	[1.045]		129/127	1.419	38	1.039	*	130/127	1.327	38	1.04	*	131/127	0.76	38	[1.046]		129/128	1.045	38	[1.044]		130/128	0.964
537	gi|363742887	PREDICTED: selenium-binding protein 1-A-like [Gallus gallus]	1446	61291	69	63	16	15	33.5	6.21	2.33	Quantitation summary for protein	129/126	1.183	56	1.075	*	130/126	1.096	56	1.061	*	131/126	0.897	56	[1.118]		129/127	1.267	56	[1.094]		130/127	1.181	56	1.05	*	131/127	0.969	56	1.101	*	129/128	0.993	56	[1.051]		130/128	0.914
538	gi|1616990	enolase [Gallus gallus]	1445	56045	51	40	7	5	22.8	7.28	0.87	Quantitation summary for protein	129/126	0.96	45	1.058	*	130/126	0.918	45	1.08	*	131/126	1.182	45	[1.137]		129/127	0.89	45	[1.094]		130/127	0.864	44	1.047	*	131/127	1.106	45	[1.091]		129/128	0.93	45	1.048	*	130/128	0.884
539	gi|363730673	PREDICTED: AFG3-like protein 2 [Gallus gallus]	1444	103232	69	54	24	23	33	8.91	1.05	Quantitation summary for protein	129/126	1.023	57	[1.045]		130/126	1.137	57	[1.028]		131/126	0.916	57	[1.042]		129/127	1.09	57	[1.051]		130/127	1.219	57	1.028	*	131/127	0.985	57	[1.035]		129/128	0.987	57	[1.025]		130/128	1.09
540	gi|2338714	restin [Gallus gallus]	1443	198050	92	68	34	27	22.4	5.27	0.69	Quantitation summary for protein	129/126	0.868	71	[1.032]		130/126	0.929	71	1.024	*	131/126	0.855	71	[1.045]		129/127	0.888	71	[1.044]		130/127	0.956	70	1.017	*	131/127	0.883	71	[1.037]		129/128	0.859	71	[1.025]		130/128	0.913
541	gi|53130426	hypothetical protein RCJMB04_7m14 [Gallus gallus]	1439	103504	58	44	18	13	24	5.38	1.11	Quantitation summary for protein	129/126	1.075	54	[1.023]		130/126	0.936	54	[1.047]		131/126	0.657	54	1.101	*	129/127	1.223	54	[1.051]		130/127	1.072	54	1.034	*	131/127	0.754	54	1.084	*	129/128	1.051	54	1.02	*	130/128	0.909
542	gi|53135834	hypothetical protein RCJMB04_25p23 [Gallus gallus]	1438	59610	90	64	23	16	43	11.11	3.26	Quantitation summary for protein	129/126	1.062	72	[1.065]		130/126	0.795	72	[1.089]		131/126	0.81	72	[1.126]		129/127	1.295	72	[1.088]		130/127	0.976	72	[1.062]		131/127	0.997	72	[1.098]		129/128	0.962	72	[1.029]		130/128	0.716
543	gi|3355757	ABC transporter protein [Gallus gallus]	1436	162967	68	54	23	19	19.4	7.06	0.52	Quantitation summary for protein	129/126	1.735	16	1.09	*	130/126	1.112	16	1.09	*	131/126	0.915	15	1.056	*	129/127	1.93	16	[1.114]		130/127	1.246	16	1.066	*	131/127	0.95	16	1.073	*	129/128	1.4	16	1.038	*	130/128	0.892
544	gi|118093867	PREDICTED: histamine N-methyltransferase [Gallus gallus]	1434	37964	59	53	11	9	35.6	5.57	3.14	Quantitation summary for protein	129/126	1.066	55	[1.047]		130/126	1.139	55	[1.080]		131/126	0.837	55	[1.126]		129/127	1.185	55	[1.086]		130/127	1.275	55	1.06	*	131/127	0.939	55	[1.108]		129/128	0.826	55	1.038	*	130/128	0.877
545	gi|363745992	PREDICTED: ATP synthase subunit delta, mitochondrial-like, partial [Gallus gallus]	1427	14648	43	39	6	5	56.1	4.49	7.07	Quantitation summary for protein	129/126	0.772	40	[1.118]		130/126	1.146	40	[1.079]		131/126	1.891	40	[1.258]		129/127	0.506	40	[1.125]		130/127	0.756	40	[1.086]		131/127	1.25	40	[1.249]		129/128	0.851	40	[1.072]		130/128	1.255
546	gi|53129679	hypothetical protein RCJMB04_5p10 [Gallus gallus]	1417	40243	35	29	8	7	37.2	8.6	2.27	Quantitation summary for protein	129/126	1.094	34	1.054	*	130/126	0.794	34	1.081	*	131/126	0.955	34	[1.158]		129/127	1.159	34	[1.084]		130/127	0.847	34	[1.055]		131/127	1.021	34	[1.134]		129/128	0.978	34	[1.032]		130/128	0.706
547	gi|310750341	ubiquinone biosynthesis protein COQ9, mitochondrial [Gallus gallus]	1410	37304	42	39	6	6	21.5	5.18	1.78	Quantitation summary for protein	129/126	0.903	40	[1.063]		130/126	1.107	40	[1.129]		131/126	1.208	40	[1.205]		129/127	0.755	40	1.041	*	130/127	0.931	40	[1.090]		131/127	1.019	40	[1.169]		129/128	0.902	39	1.028	*	130/128	1.096
548	gi|53136840	hypothetical protein RCJMB04_34n23 [Gallus gallus]	1410	24431	40	34	11	8	54.3	4.94	5.03	Quantitation summary for protein	129/126	0.84	35	1.043	*	130/126	1.142	36	[1.097]		131/126	1.402	36	[1.170]		129/127	0.786	36	1.097	*	130/127	1.058	36	1.041	*	131/127	1.302	36	[1.118]		129/128	1.096	36	[1.043]		130/128	1.455
549	gi|453474	acidic ribosomal phosphoprotein [Gallus gallus]	1409	39247	73	44	15	12	53.5	5.72	5.96	Quantitation summary for protein	129/126	1.085	59	[1.050]		130/126	1.03	60	[1.090]		131/126	0.952	59	[1.175]		129/127	0.918	60	[1.071]		130/127	0.877	61	[1.063]		131/127	0.814	60	[1.156]		129/128	1.109	59	1.03	*	130/128	1.045
550	gi|53134035	hypothetical protein RCJMB04_22f12 [Gallus gallus]	1409	53801	64	54	14	10	38.4	6.06	2.69	Quantitation summary for protein	129/126	0.898	61	[1.056]		130/126	0.946	61	[1.070]		131/126	0.96	61	[1.113]		129/127	0.982	61	[1.069]		130/127	1.042	61	[1.049]		131/127	1.06	61	[1.092]		129/128	1.067	61	[1.042]		130/128	1.117
551	gi|363732251	PREDICTED: glutathione S-transferase-like [Gallus gallus]	1408	30477	122	50	15	12	62	7.85	21.24	Quantitation summary for protein	129/126	1.537	13	1.154	*	130/126	0.956	13	1.081		131/126	0.911	12	1.155	*	129/127	1.717	13	1.243	*	130/127	1.075	13	1.044	*	131/127	1.046	12	1.135		129/128	0.998	13	[1.129]		130/128	0.616
552	gi|118090272	PREDICTED: G-rich sequence factor 1 [Gallus gallus]	1407	50722	57	52	14	12	40.7	6.55	1.74	Quantitation summary for protein	129/126	0.963	54	[1.066]		130/126	1.029	54	[1.040]		131/126	1.138	54	[1.056]		129/127	0.769	54	[1.092]		130/127	0.827	54	1.021	*	131/127	0.917	54	[1.035]		129/128	1.05	54	[1.035]		130/128	1.115
553	gi|316995835	complement C4 precursor [Gallus gallus]	1403	199911	58	46	22	15	17.3	6.82	0.43	Quantitation summary for protein	129/126	0.876	50	1.042	*	130/126	0.904	50	[1.056]		131/126	0.973	50	[1.077]		129/127	1.084	50	1.053	*	130/127	1.134	49	1.037	*	131/127	1.216	50	[1.064]		129/128	0.935	49	1.031	*	130/128	0.939
554	gi|3136063	20S proteasome subunit C2 [Gallus gallus]	1402	32400	53	46	12	9	48.8	6.08	3.32	Quantitation summary for protein	129/126	1.167	47	1.049	*	130/126	0.862	46	1.059	*	131/126	0.964	47	[1.170]		129/127	1.299	47	[1.069]		130/127	0.945	47	1.048	*	131/127	1.082	47	[1.154]		129/128	1.105	47	1.027	*	130/128	0.794
555	gi|14330322	alpha subunit of sodium potassium ATPase [Gallus gallus]	1401	46493	41	37	10	10	35.8	5.03	1.8	Quantitation summary for protein	129/126	---	0	---		130/126	---	0	---		131/126	---	0	---		129/127	---	0	---		130/127	---	0	---		131/127	---	0	---		129/128	---	0	---		130/128	---
556	gi|363733087	PREDICTED: kynurenine/alpha-aminoadipate aminotransferase, mitochondrial [Gallus gallus]	1400	54248	53	41	13	11	33.9	8.68	1.42	Quantitation summary for protein	129/126	0.799	44	1.035	*	130/126	1.042	45	[1.055]		131/126	1.077	45	[1.081]		129/127	0.665	45	[1.052]		130/127	0.875	45	[1.050]		131/127	0.907	45	[1.091]		129/128	0.83	45	[1.033]		130/128	1.079
557	gi|12964	unnamed protein product [Gallus gallus]	1397	27098	49	46	7	7	33	4.57	4.08	Quantitation summary for protein	129/126	1.114	47	1.101	*	130/126	1.202	47	1.113	*	131/126	1.033	46	1.121		129/127	1.174	47	[1.114]		130/127	1.271	46	1.092	*	131/127	1.099	46	1.096	*	129/128	0.903	46	[1.079]		130/128	0.969
558	gi|3204175	prostaglandin-D synthase [Gallus gallus]	1391	26955	105	85	15	13	43.7	6.74	17.44	Quantitation summary for protein	129/126	1.026	93	[1.069]		130/126	0.929	93	[1.141]		131/126	0.951	93	[1.219]		129/127	1.157	93	[1.100]		130/127	1.054	93	[1.081]		131/127	1.082	93	[1.162]		129/128	0.874	93	[1.039]		130/128	0.786
559	gi|53132734	hypothetical protein RCJMB04_13o11 [Gallus gallus]	1391	69310	55	37	15	12	32.7	8.99	1.53	Quantitation summary for protein	129/126	0.817	53	1.04	*	130/126	1.023	53	[1.041]		131/126	1.042	53	[1.072]		129/127	0.785	53	[1.046]		130/127	0.99	53	1.046		131/127	1.011	53	1.069		129/128	0.83	53	1.029	*	130/128	1.032
560	gi|363729530	PREDICTED: hemopexin [Gallus gallus]	1389	45365	50	45	14	11	59.3	5.36	2.79	Quantitation summary for protein	129/126	1.138	45	1.069	*	130/126	1.287	45	[1.152]		131/126	2.174	45	1.173	*	129/127	1.201	43	1.075	*	130/127	1.371	43	[1.096]		131/127	1.925	42	1.124	*	129/128	1.259	45	1.059	*	130/128	1.415
561	gi|2148922	tissue transglutaminase [Gallus gallus]	1387	85679	65	46	17	15	30.9	4.92	1.97	Quantitation summary for protein	129/126	0.704	6	1.033	*	130/126	0.617	6	1.014	*	131/126	0.627	6	1.071	*	129/127	1.194	5	1.012	*	130/127	1.058	6	1.018	*	131/127	1.078	6	1.058	*	129/128	0.936	6	1.044	*	130/128	0.815
562	gi|53133828	hypothetical protein RCJMB04_20k18 [Gallus gallus]	1384	33633	47	41	11	10	44.9	5.79	2.73	Quantitation summary for protein	129/126	1.347	42	1.058	*	130/126	0.681	42	1.069	*	131/126	0.665	42	[1.114]		129/127	1.587	42	[1.092]		130/127	0.808	42	[1.046]		131/127	0.791	42	[1.075]		129/128	1.26	42	1.038	*	130/128	0.631
563	gi|363742810	PREDICTED: ubiquitin associated protein 2-like [Gallus gallus]	1383	143722	55	48	13	11	13.6	6.63	0.4	Quantitation summary for protein	129/126	0.876	51	[1.037]		130/126	0.933	52	[1.080]		131/126	1.011	52	[1.140]		129/127	0.901	51	[1.079]		130/127	0.965	52	[1.038]		131/127	1.049	52	[1.091]		129/128	1.066	50	[1.025]		130/128	1.126
564	gi|53130368	hypothetical protein RCJMB04_7e17 [Gallus gallus]	1379	84507	64	53	25	21	37.9	8.88	1.69	Quantitation summary for protein	129/126	0.849	57	[1.048]		130/126	0.999	57	1.067		131/126	0.999	57	[1.105]		129/127	0.996	57	1.06		130/127	1.18	57	1.048	*	131/127	1.182	57	[1.073]		129/128	0.938	57	[1.034]		130/128	1.096
565	gi|833621	alpha tropomyosin of brain [Gallus gallus]	1377	33745	100	82	19	16	47.8	4.68	9.43	Quantitation summary for protein	129/126	0.988	11	1.176		130/126	0.918	11	1.131	*	131/126	0.807	11	1.261	*	129/127	1.157	11	[1.252]		130/127	1.082	11	1.06	*	131/127	0.954	11	1.197		129/128	0.89	11	1.044	*	130/128	0.822
566	gi|118099442	PREDICTED: erythrocyte band 7 integral membrane protein [Gallus gallus]	1372	34689	44	38	12	11	48.8	6.75	3.71	Quantitation summary for protein	129/126	0.96	43	1.062	*	130/126	1.034	43	[1.048]		131/126	0.788	43	1.082	*	129/127	1.226	43	[1.077]		130/127	1.33	43	[1.039]		131/127	1.015	43	1.061		129/128	0.841	43	[1.036]		130/128	0.9
567	gi|53127378	hypothetical protein RCJMB04_2a21 [Gallus gallus]	1367	46558	49	47	12	11	51	6.12	2.21	Quantitation summary for protein	129/126	0.903	23	1.044	*	130/126	1.008	23	1.061		131/126	1.277	23	[1.062]		129/127	0.814	23	1.058	*	130/127	0.915	23	[1.061]		131/127	1.162	23	[1.069]		129/128	1.014	23	[1.059]		130/128	1.124
568	gi|313661454	chaperone activity of bc1 complex-like, mitochondrial [Gallus gallus]	1366	84358	54	46	12	12	24.4	6.36	0.77	Quantitation summary for protein	129/126	0.875	47	1.086	*	130/126	1.109	47	1.037	*	131/126	1.174	47	1.067	*	129/127	0.704	47	[1.105]		130/127	0.898	47	1.039	*	131/127	0.954	47	[1.057]		129/128	0.937	47	1.06	*	130/128	1.18
569	gi|118092131	PREDICTED: alpha-1-antichymotrypsin [Gallus gallus]	1365	54652	52	46	14	13	36.3	5.7	1.71	Quantitation summary for protein	129/126	4.036	50	1.172	*	130/126	1.899	49	1.102	*	131/126	3.711	50	[1.191]		129/127	2.798	50	1.127	*	130/127	1.325	49	1.052	*	131/127	2.596	50	[1.179]		129/128	4.257	49	1.178	*	130/128	1.989
570	gi|53136508	hypothetical protein RCJMB04_30b2 [Gallus gallus]	1365	62223	80	63	18	15	29.7	6.22	3.22	Quantitation summary for protein	129/126	0.727	68	[1.078]		130/126	1.061	68	[1.124]		131/126	1.204	68	[1.228]		129/127	0.869	68	[1.113]		130/127	1.277	68	[1.069]		131/127	1.452	68	[1.159]		129/128	0.763	68	[1.046]		130/128	1.107
571	gi|363740873	PREDICTED: ATP-binding cassette sub-family A member 10 [Gallus gallus]	1362	207186	46	44	15	14	10.7	6.82	0.32	Quantitation summary for protein	129/126	0.694	45	1.065	*	130/126	0.959	45	[1.047]		131/126	0.618	45	1.115	*	129/127	0.824	45	[1.088]		130/127	1.147	45	[1.036]		131/127	0.741	45	[1.099]		129/128	0.579	45	[1.048]		130/128	0.795
572	gi|60098595	hypothetical protein RCJMB04_3o14 [Gallus gallus]	1357	68350	56	49	16	14	29.5	5.07	1.68	Quantitation summary for protein	129/126	1.259	53	[1.046]		130/126	0.941	53	[1.063]		131/126	0.945	53	[1.110]		129/127	1.193	53	[1.082]		130/127	0.898	53	[1.036]		131/127	0.903	53	[1.076]		129/128	1.15	53	1.023	*	130/128	0.854
573	gi|363735855	PREDICTED: heterogeneous nuclear ribonucleoprotein A3 homolog 1-like [Gallus gallus]	1357	46733	62	58	11	9	22.8	9.24	1.43	Quantitation summary for protein	129/126	0.636	47	[1.123]		130/126	0.945	47	[1.113]		131/126	0.563	47	[1.195]		129/127	0.672	47	1.161	*	130/127	1.005	47	[1.090]		131/127	0.601	47	[1.168]		129/128	0.911	47	1.056	*	130/128	1.344
574	gi|53133724	hypothetical protein RCJMB04_19l6 [Gallus gallus]	1357	38917	40	37	8	7	29.1	5.04	1.26	Quantitation summary for protein	129/126	0.918	39	[1.066]		130/126	1.042	39	1.068	*	131/126	1.246	39	[1.102]		129/127	0.877	39	[1.112]		130/127	1.002	39	[1.044]		131/127	1.201	39	1.062	*	129/128	1.002	39	[1.032]		130/128	1.13
575	gi|53130402	hypothetical protein RCJMB04_7i6 [Gallus gallus]	1356	47786	55	47	13	12	32.9	8.11	2.55	Quantitation summary for protein	129/126	1.532	52	[1.077]		130/126	1.231	52	1.07	*	131/126	1.211	52	[1.104]		129/127	1.211	52	[1.107]		130/127	0.98	52	1.04	*	131/127	0.966	52	1.073	*	129/128	1.145	52	1.033	*	130/128	0.914
576	gi|53134140	hypothetical protein RCJMB04_22k18 [Gallus gallus]	1354	58416	55	45	11	11	34.9	4.9	1.68	Quantitation summary for protein	129/126	1.121	50	1.039	*	130/126	1.104	50	1.035	*	131/126	1.017	50	1.045	*	129/127	0.985	49	1.043	*	130/127	0.939	50	[1.039]		131/127	0.867	50	1.051	*	129/128	1.059	50	1.032	*	130/128	1.036
577	gi|363741140	PREDICTED: 60S ribosomal protein L23a [Gallus gallus]	1346	24749	70	56	10	9	49.7	10.44	7.61	Quantitation summary for protein	129/126	1.026	66	1.05	*	130/126	1.163	66	[1.073]		131/126	1.548	66	[1.119]		129/127	0.905	66	1.073	*	130/127	1.032	66	[1.056]		131/127	1.377	66	[1.108]		129/128	1.207	66	1.048	*	130/128	1.359
578	gi|63511	heat shock protein 47 [Gallus gallus]	1341	54877	60	54	14	13	36.5	8.74	2.61	Quantitation summary for protein	129/126	0.953	57	[1.075]		130/126	1.42	57	[1.068]		131/126	1.437	57	[1.102]		129/127	0.652	57	[1.111]		130/127	0.978	57	[1.039]		131/127	0.992	57	[1.094]		129/128	1.224	56	1.032	*	130/128	1.812
579	gi|53133664	hypothetical protein RCJMB04_19c24 [Gallus gallus]	1340	73633	38	38	13	13	25.3	4.7	0.84	Quantitation summary for protein	129/126	1.056	38	1.023	*	130/126	0.843	38	1.041	*	131/126	0.747	38	1.094	*	129/127	1.263	38	[1.031]		130/127	1.015	38	1.027	*	131/127	0.901	38	1.08	*	129/128	1.051	38	[1.015]		130/128	0.834
580	gi|60098495	hypothetical protein RCJMB04_3b17 [Gallus gallus]	1340	64397	41	39	11	11	23.8	9.35	1.33	Quantitation summary for protein	129/126	1.023	38	[1.186]		130/126	0.953	38	[1.155]		131/126	0.978	38	[1.242]		129/127	1.093	38	[1.215]		130/127	1.025	38	1.112		131/127	1.055	38	1.183		129/128	1.011	37	[1.080]		130/128	0.93
581	gi|118087781	PREDICTED: aldose 1-epimerase isoform 2 [Gallus gallus]	1340	42765	57	50	14	12	40.6	6.19	2.82	Quantitation summary for protein	129/126	1.078	52	1.052	*	130/126	1.135	53	[1.076]		131/126	0.988	51	1.081		129/127	0.906	53	[1.084]		130/127	1.008	53	1.068		131/127	0.884	53	[1.089]		129/128	1.041	53	1.051	*	130/128	1.143
582	gi|27465053	alpha-tropomyosin 2 [Gallus gallus]	1339	40868	101	81	22	18	53.9	4.65	8.56	Quantitation summary for protein	129/126	1.159	2	1.291		130/126	1.026	2	1.134		131/126	0.634	2	1.644		129/127	1.086	2	1.136		130/127	0.969	2	1.002	*	131/127	0.6	2	1.446		129/128	0.837	2	1.138		130/128	0.737
583	gi|363731918	PREDICTED: angiotensinogen [Gallus gallus]	1338	60581	60	49	16	15	38.9	5.41	1.73	Quantitation summary for protein	129/126	2.412	53	[1.048]		130/126	1.465	53	[1.042]		131/126	1.894	53	[1.076]		129/127	2.085	53	1.047	*	130/127	1.276	53	[1.039]		131/127	1.653	53	[1.066]		129/128	2.642	53	1.056	*	130/128	1.584
584	gi|118099288	PREDICTED: carnitine O-acetyltransferase [Gallus gallus]	1337	82326	93	73	25	23	36.5	8.74	2.92	Quantitation summary for protein	129/126	0.839	82	[1.066]		130/126	1.268	82	[1.086]		131/126	1.418	82	[1.155]		129/127	0.645	82	[1.086]		130/127	0.981	82	[1.055]		131/127	1.1	82	[1.122]		129/128	0.729	82	1.037	*	130/128	1.095
585	gi|363742357	PREDICTED: probable beta-D-xylosidase 5-like [Gallus gallus]	1332	86143	57	50	14	14	18.9	7.62	0.89	Quantitation summary for protein	129/126	0.591	54	[1.059]		130/126	1.065	54	[1.035]		131/126	1.047	54	1.057	*	129/127	0.517	54	1.068	*	130/127	0.938	54	[1.037]		131/127	0.925	54	1.057	*	129/128	0.615	54	1.051	*	130/128	1.101
586	gi|50746905	PREDICTED: 3-hydroxybutyrate dehydrogenase type 2 [Gallus gallus]	1330	31085	60	50	15	14	49	6.84	7.45	Quantitation summary for protein	129/126	1.1	55	1.097	*	130/126	1.023	55	[1.212]		131/126	1.365	55	[1.401]		129/127	0.86	55	[1.191]		130/127	0.805	55	1.127	*	131/127	1.077	55	[1.325]		129/128	1.106	55	1.039	*	130/128	1.022
587	gi|53131920	hypothetical protein RCJMB04_12f15 [Gallus gallus]	1326	66445	52	44	19	15	32.2	5.81	1.75	Quantitation summary for protein	129/126	1.201	37	[1.051]		130/126	0.932	37	[1.074]		131/126	1.031	37	[1.102]		129/127	1.265	37	[1.078]		130/127	0.989	37	1.051		131/127	1.095	37	[1.072]		129/128	1.214	37	1.039	*	130/128	0.936
588	gi|363728772	PREDICTED: pyridoxal kinase [Gallus gallus]	1325	40435	54	43	12	10	39.8	5.93	3.12	Quantitation summary for protein	129/126	0.868	46	1.075	*	130/126	1.105	46	[1.088]		131/126	1.7	46	[1.142]		129/127	0.694	46	1.093	*	130/127	0.889	46	1.07	*	131/127	1.371	46	[1.107]		129/128	1.031	46	[1.084]		130/128	1.303
589	gi|363728812	PREDICTED: glycerol kinase isoform 3 [Gallus gallus]	1325	65371	47	41	11	11	23	5.68	1.19	Quantitation summary for protein	129/126	0.958	43	1.041	*	130/126	1.069	43	1.037	*	131/126	0.906	43	1.08	*	129/127	0.905	42	1.043	*	130/127	1.02	42	1.049	*	131/127	0.865	43	1.085	*	129/128	0.84	43	[1.050]		130/128	0.931
590	gi|343790924	aldo-keto reductase family 1, member B1-like [Gallus gallus]	1324	42659	82	64	15	13	42.7	7.14	4.57	Quantitation summary for protein	129/126	---	0	---		130/126	---	0	---		131/126	---	0	---		129/127	---	0	---		130/127	---	0	---		131/127	---	0	---		129/128	---	0	---		130/128	---
591	gi|363742044	PREDICTED: protein DDI1 homolog 2 [Gallus gallus]	1323	47685	43	37	10	8	30.7	4.88	1.09	Quantitation summary for protein	129/126	0.942	39	1.033	*	130/126	0.987	39	[1.065]		131/126	1.248	39	[1.109]		129/127	0.833	39	1.038	*	130/127	0.879	39	[1.038]		131/127	1.114	39	[1.091]		129/128	1.021	39	1.027	*	130/128	1.064
592	gi|806554	actin-like protein [Gallus gallus]	1322	51146	63	51	16	12	36.8	6.3	2.48	Quantitation summary for protein	129/126	0.917	52	[1.043]		130/126	0.897	52	[1.048]		131/126	0.98	52	[1.093]		129/127	1.101	52	[1.053]		130/127	1.084	52	1.035	*	131/127	1.187	52	[1.084]		129/128	0.821	52	1.031	*	130/128	0.798
593	gi|50730713	PREDICTED: ES1 protein homolog, mitochondrial isoform 2 [Gallus gallus]	1320	28611	49	42	10	9	55.1	6.17	4.21	Quantitation summary for protein	129/126	0.944	45	[1.050]		130/126	0.962	45	[1.057]		131/126	1.084	45	[1.101]		129/127	1.033	45	[1.070]		130/127	1.064	42	1.033	*	131/127	1.197	45	[1.077]		129/128	0.98	45	[1.040]		130/128	0.993
594	gi|363746871	PREDICTED: 3-hydroxyacyl-CoA dehydrogenase type-2-like [Gallus gallus]	1319	13862	50	48	7	7	67.5	6.71	26.04	Quantitation summary for protein	129/126	0.767	12	[1.131]		130/126	1.067	12	1.075	*	131/126	1.414	12	1.21	*	129/127	0.617	12	[1.174]		130/127	0.865	12	1.082	*	131/127	1.149	12	1.217	*	129/128	0.852	12	1.128	*	130/128	1.179
595	gi|60098591	hypothetical protein RCJMB04_3o5 [Gallus gallus]	1318	103505	49	44	16	14	21.5	6.19	0.75	Quantitation summary for protein	129/126	1.088	47	[1.035]		130/126	0.884	47	[1.031]		131/126	0.811	47	[1.072]		129/127	1.323	47	[1.048]		130/127	1.082	47	[1.027]		131/127	0.995	47	[1.059]		129/128	1.161	47	1.023	*	130/128	0.937
596	gi|148229985	B-cell receptor-associated protein 29 [Gallus gallus]	1318	32846	42	41	8	7	36.6	9.16	1.88	Quantitation summary for protein	129/126	1.339	41	[1.047]		130/126	0.941	41	1.048	*	131/126	0.649	41	1.081	*	129/127	1.887	41	[1.069]		130/127	1.335	41	1.041	*	131/127	0.923	41	1.056	*	129/128	1.211	41	1.028	*	130/128	0.845
597	gi|50806588	PREDICTED: 60S ribosomal protein L17 [Gallus gallus]	1317	27799	84	66	10	8	42.4	10.2	5.88	Quantitation summary for protein	129/126	1.088	75	[1.051]		130/126	1.109	75	[1.057]		131/126	1.236	75	[1.113]		129/127	0.989	75	[1.069]		130/127	1.016	75	1.04	*	131/127	1.135	75	[1.093]		129/128	1.175	75	1.024	*	130/128	1.19
598	gi|389566436	interleukin enhancer binding factor 3-like protein [Gallus gallus]	1316	111170	50	47	16	15	20.5	8.9	0.73	Quantitation summary for protein	129/126	1	48	1.022		130/126	0.96	48	1.024	*	131/126	0.789	48	1.058	*	129/127	1.113	48	1.03	*	130/127	1.076	48	1.019	*	131/127	0.866	47	1.053	*	129/128	0.941	48	1.014	*	130/128	0.898
599	gi|28558813	RecName: Full=Sulfite oxidase	1316	53152	62	55	16	16	55.1	5.8	3.49	Quantitation summary for protein	129/126	0.923	58	[1.081]		130/126	0.963	58	[1.074]		131/126	1.152	57	1.088	*	129/127	0.782	58	1.1	*	130/127	0.821	58	[1.070]		131/127	0.988	58	[1.091]		129/128	1.121	58	[1.073]		130/128	1.162
600	gi|118094764	PREDICTED: cystathionine gamma-lyase [Gallus gallus]	1314	50742	56	48	15	15	47.1	6.86	2.75	Quantitation summary for protein	129/126	1.733	55	1.138	*	130/126	0.961	55	[1.089]		131/126	1.29	55	[1.139]		129/127	1.601	55	1.136	*	130/127	0.894	55	1.075	*	131/127	1.202	55	[1.108]		129/128	1.282	55	1.082	*	130/128	0.706
601	gi|53133788	hypothetical protein RCJMB04_20e18 [Gallus gallus]	1313	113465	59	49	22	21	25.4	6.03	1.09	Quantitation summary for protein	129/126	1.314	53	1.033	*	130/126	1.025	53	1.038	*	131/126	0.8	53	[1.068]		129/127	1.268	53	1.048	*	130/127	0.996	53	1.025		131/127	0.779	53	1.054	*	129/128	1.205	53	1.025	*	130/128	0.934
602	gi|53130213	hypothetical protein RCJMB04_6j4 [Gallus gallus]	1312	61650	59	48	16	14	32.9	8.4	3.29	Quantitation summary for protein	129/126	0.929	55	[1.098]		130/126	1.055	55	[1.143]		131/126	0.76	55	[1.258]		129/127	1.023	56	[1.067]		130/127	1.169	56	[1.104]		131/127	0.846	56	[1.212]		129/128	0.662	56	[1.055]		130/128	0.747
603	gi|118084684	PREDICTED: citrate lyase beta like [Gallus gallus]	1312	47542	49	41	12	12	37.7	9.18	2.83	Quantitation summary for protein	129/126	0.99	45	1.029	*	130/126	1.044	45	1.049	*	131/126	1.025	45	[1.084]		129/127	0.84	45	[1.049]		130/127	0.892	45	[1.040]		131/127	0.877	45	1.072	*	129/128	1.012	45	[1.033]		130/128	1.079
604	gi|50748422	PREDICTED: signal recognition particle 54 kDa protein isoform 2 [Gallus gallus]	1311	67174	54	45	19	17	40.5	8.87	1.73	Quantitation summary for protein	129/126	1.169	49	1.027	*	130/126	1.054	49	[1.051]		131/126	1.063	49	[1.101]		129/127	1.129	49	1.035	*	130/127	1.025	49	[1.036]		131/127	1.036	49	[1.085]		129/128	1.203	49	1.028	*	130/128	1.077
605	gi|118104137	PREDICTED: ubiquilin-1 isoform 2 [Gallus gallus]	1311	65122	42	37	9	9	23.8	5.15	0.9	Quantitation summary for protein	129/126	1.017	33	1.107		130/126	1.122	33	[1.097]		131/126	1.523	32	1.125	*	129/127	0.864	32	1.08	*	130/127	0.971	33	1.087	*	131/127	1.313	31	1.093	*	129/128	1.11	33	1.106	*	130/128	1.217
606	gi|118101519	PREDICTED: interferon-induced guanylate-binding protein 1 [Gallus gallus]	1311	125133	56	49	19	15	20.6	5.57	0.59	Quantitation summary for protein	129/126	1.025	44	[1.068]		130/126	0.609	44	1.059	*	131/126	0.459	44	[1.115]		129/127	1.758	44	[1.108]		130/127	1.052	44	1.031	*	131/127	0.795	44	[1.067]		129/128	0.855	44	1.056	*	130/128	0.505
607	gi|313851076	synaptosomal-associated protein 23 [Gallus gallus]	1306	26394	39	38	9	8	50.2	4.9	3.69	Quantitation summary for protein	129/126	1.143	39	1.043	*	130/126	1.047	39	1.069	*	131/126	0.653	39	[1.179]		129/127	1.351	39	1.075	*	130/127	1.246	39	1.041	*	131/127	0.78	39	[1.136]		129/128	1.084	38	1.031	*	130/128	0.985
608	gi|1399943	26S ATPase complex subunit 4 [Gallus gallus]	1306	59885	57	48	16	12	37	5.87	1.76	Quantitation summary for protein	129/126	1.062	50	[1.060]		130/126	1.003	50	[1.045]		131/126	0.982	50	[1.142]		129/127	1.099	50	[1.073]		130/127	1.045	50	[1.052]		131/127	1.025	50	[1.142]		129/128	1.126	50	1.034	*	130/128	1.057
609	gi|438007	alpha-2-macroglobulin receptor [Gallus gallus]	1302	575746	83	66	31	27	7.4	5.05	0.2	Quantitation summary for protein	129/126	1.297	70	1.027	*	130/126	0.968	70	[1.039]		131/126	0.834	70	1.087	*	129/127	1.512	70	1.052	*	130/127	1.135	70	1.025	*	131/127	0.98	70	[1.069]		129/128	1.219	70	[1.022]		130/128	0.904
610	gi|63560	unnamed protein product [Gallus gallus]	1301	77638	62	46	25	19	36.8	5.31	1.49	Quantitation summary for protein	129/126	0.972	50	1.057	*	130/126	1.764	50	1.071	*	131/126	2.407	50	1.118	*	129/127	1.086	50	1.049	*	130/127	1.984	50	1.088	*	131/127	2.713	50	1.128	*	129/128	0.945	50	1.043	*	130/128	1.704
611	gi|118085740	PREDICTED: macrophage mannose receptor 1-like [Gallus gallus]	1300	188431	54	46	18	17	14	5.71	0.43	Quantitation summary for protein	129/126	1.257	52	1.038	*	130/126	0.989	52	1.045		131/126	0.766	52	1.073	*	129/127	1.326	52	[1.054]		130/127	1.048	51	1.033	*	131/127	0.815	52	1.065	*	129/128	1.301	52	1.027	*	130/128	1.017
612	gi|882147	CRMP-62 [Gallus gallus]	1300	70253	56	47	18	14	41.6	5.96	1.73	Quantitation summary for protein	129/126	0.995	43	[1.048]		130/126	1.008	43	1.049		131/126	1.13	43	[1.094]		129/127	0.946	43	1.065	*	130/127	0.965	43	1.064	*	131/127	1.083	43	[1.100]		129/128	0.954	43	[1.038]		130/128	0.961
613	gi|65306315	EF hand-containing protein 1 [Gallus gallus]	1295	31321	49	46	12	12	56.7	5.07	4.03	Quantitation summary for protein	129/126	1.056	45	[1.045]		130/126	0.834	44	1.046	*	131/126	0.803	44	1.117	*	129/127	1.261	44	1.036	*	130/127	1.002	44	[1.044]		131/127	0.966	44	[1.116]		129/128	1.026	45	[1.046]		130/128	0.805
614	gi|115592	RecName: Full=F-actin-capping protein subunit alpha-1; AltName: Full=Beta-actinin subunit I; AltName: Full=CapZ 36/32	1295	37923	45	43	10	10	44.1	5.43	2.51	Quantitation summary for protein	129/126	0.836	28	1.045	*	130/126	0.875	28	[1.067]		131/126	0.989	28	[1.131]		129/127	0.957	28	1.041	*	130/127	1.01	28	[1.045]		131/127	1.144	28	[1.105]		129/128	0.842	28	1.035	*	130/128	0.877
615	gi|3641556	fibrinogen gamma chain precursor [Gallus gallus]	1293	56598	56	44	18	14	41.6	5.48	2.28	Quantitation summary for protein	129/126	1.281	51	1.049	*	130/126	1.173	51	[1.061]		131/126	1.521	51	[1.115]		129/127	1.016	51	[1.079]		130/127	0.937	52	[1.038]		131/127	1.217	51	[1.085]		129/128	1.316	51	1.036	*	130/128	1.198
616	gi|363733121	PREDICTED: peptidyl-prolyl cis-trans isomerase D [Gallus gallus]	1291	49790	62	49	19	14	47.6	5.98	2.6	Quantitation summary for protein	129/126	0.927	54	[1.061]		130/126	0.927	54	[1.061]		131/126	0.793	54	[1.105]		129/127	0.903	54	[1.083]		130/127	0.909	54	[1.048]		131/127	0.779	54	[1.095]		129/128	0.932	54	1.039	*	130/128	0.926
617	gi|118093267	PREDICTED: putative methyltransferase DDB_G0268948 isoform 1 [Gallus gallus]	1284	35224	82	56	18	17	49.1	6	16.84	Quantitation summary for protein	129/126	0.87	72	[1.102]		130/126	1.229	72	1.118	*	131/126	1.125	70	[1.167]		129/127	0.683	72	[1.169]		130/127	0.972	72	1.073	*	131/127	0.891	70	[1.139]		129/128	0.954	72	[1.047]		130/128	1.338
618	gi|363744546	PREDICTED: guanine deaminase [Gallus gallus]	1280	56549	48	41	13	12	37.3	5.46	1.62	Quantitation summary for protein	129/126	0.537	40	1.061	*	130/126	0.775	40	[1.058]		131/126	0.685	40	1.118	*	129/127	0.524	41	[1.076]		130/127	0.761	40	[1.051]		131/127	0.675	41	1.118	*	129/128	0.732	40	1.03	*	130/128	1.05
619	gi|118098357	PREDICTED: tricarboxylate transport protein, mitochondrial [Gallus gallus]	1280	40243	66	52	14	10	50.6	9.54	6.19	Quantitation summary for protein	129/126	0.839	56	[1.055]		130/126	1.08	55	[1.090]		131/126	1.059	56	[1.182]		129/127	0.908	56	1.067	*	130/127	1.178	55	[1.068]		131/127	1.157	56	[1.161]		129/128	0.908	56	[1.040]		130/128	1.162
620	gi|53127702	hypothetical protein RCJMB04_2p21 [Gallus gallus]	1279	35374	41	37	7	7	28.8	4.45	2.83	Quantitation summary for protein	129/126	1.784	41	[1.281]		130/126	1.404	41	[1.072]		131/126	1.37	40	[1.297]		129/127	1.836	41	[1.327]		130/127	1.455	41	[1.104]		131/127	1.423	40	[1.314]		129/128	1.587	41	[1.109]		130/128	1.242
621	gi|53130802	hypothetical protein RCJMB04_10d1 [Gallus gallus]	1279	62477	55	50	12	12	28	6.15	1.39	Quantitation summary for protein	129/126	1.007	51	1.027		130/126	1.004	51	1.037		131/126	1.092	50	[1.046]		129/127	0.933	50	[1.049]		130/127	0.937	50	[1.051]		131/127	1.021	50	[1.041]		129/128	1.053	51	1.029	*	130/128	1.044
622	gi|363740578	PREDICTED: protein transport protein Sec16A [Gallus gallus]	1278	286991	52	42	15	13	7.9	5.68	0.16	Quantitation summary for protein	129/126	1.148	46	1.027	*	130/126	0.957	46	1.022	*	131/126	0.936	46	1.052	*	129/127	1.247	46	1.036	*	130/127	1.054	45	1.021	*	131/127	1.026	46	1.047	*	129/128	1.183	46	[1.025]		130/128	0.981
623	gi|126507424	dihydrofolate reductase [Gallus gallus]	1274	26177	65	47	10	9	50.5	8.5	10	Quantitation summary for protein	129/126	1.075	9	1.035	*	130/126	1.195	9	1.045	*	131/126	1.132	9	1.06	*	129/127	0.818	9	1.045	*	130/127	0.915	9	1.055	*	131/127	0.869	9	1.059	*	129/128	1.083	9	1.053	*	130/128	1.195
624	gi|363747239	PREDICTED: drebrin-like [Gallus gallus]	1274	58065	46	39	14	11	34.7	5.14	1.42	Quantitation summary for protein	129/126	0.851	40	1.045	*	130/126	1.073	40	[1.062]		131/126	1.171	40	[1.151]		129/127	0.95	40	1.058	*	130/127	1.206	40	[1.048]		131/127	1.32	40	[1.128]		129/128	0.847	40	1.054	*	130/128	1.061
625	gi|118092776	PREDICTED: WASH complex subunit FAM21A [Gallus gallus]	1274	177819	48	42	16	14	15.9	4.59	0.36	Quantitation summary for protein	129/126	0.805	44	[1.035]		130/126	0.832	44	[1.058]		131/126	0.831	44	[1.106]		129/127	0.896	44	[1.048]		130/127	0.933	44	1.031	*	131/127	0.934	44	[1.077]		129/128	0.948	44	1.022	*	130/128	0.974
626	gi|53133816	hypothetical protein RCJMB04_20k1 [Gallus gallus]	1274	36381	71	63	13	13	43.5	10.83	8.63	Quantitation summary for protein	129/126	0.962	65	1.092	*	130/126	1.03	65	[1.081]		131/126	1.29	65	[1.085]		129/127	0.981	65	[1.112]		130/127	1.057	65	[1.079]		131/127	1.326	65	[1.072]		129/128	1.116	65	1.059	*	130/128	1.187
627	gi|356582407	ribosomal protein L32 [Gallus gallus]	1273	20546	74	68	6	6	34.8	11.35	8.71	Quantitation summary for protein	129/126	1.022	71	1.072	*	130/126	0.91	71	[1.058]		131/126	0.851	71	[1.089]		129/127	0.996	71	[1.076]		130/127	0.892	71	1.04	*	131/127	0.836	71	[1.071]		129/128	1.094	71	1.044	*	130/128	0.967
628	gi|50753071	PREDICTED: fumarylacetoacetase [Gallus gallus]	1273	51158	60	54	16	15	43.2	7.31	3.2	Quantitation summary for protein	129/126	1.12	57	[1.060]		130/126	1.303	57	[1.096]		131/126	1.681	57	[1.145]		129/127	0.881	57	[1.097]		130/127	1.032	57	[1.064]		131/127	1.335	57	[1.122]		129/128	0.995	57	1.037		130/128	1.15
629	gi|1478490	acyl-coenzyme A binding protein, ACBP [chickens, Peptide, 86 aa]	1272	12847	82	48	8	5	79.1	5.8	42.46	Quantitation summary for protein	129/126	0.888	65	[1.061]		130/126	1.45	65	[1.247]		131/126	2.753	65	[1.434]		129/127	0.653	65	[1.182]		130/127	1.074	65	1.095	*	131/127	2.044	65	[1.267]		129/128	0.965	64	1.059	*	130/128	1.561
630	gi|88908538	RecName: Full=26S proteasome non-ATPase regulatory subunit 13; AltName: Full=26S proteasome regulatory subunit RPN9; AltName: Full=26S proteasome regulatory subunit S11; AltName: Full=26S proteasome regulatory subunit p40.5	1270	48280	56	54	12	12	34.3	5.37	1.88	Quantitation summary for protein	129/126	1.228	55	[1.030]		130/126	1.027	55	[1.041]		131/126	0.887	55	[1.071]		129/127	1.315	55	[1.060]		130/127	1.107	55	[1.025]		131/127	0.959	55	[1.057]		129/128	1.193	55	[1.023]		130/128	0.991
631	gi|50749278	PREDICTED: phenazine biosynthesis-like protein domain containing [Gallus gallus]	1269	37454	51	49	9	8	32.3	6.72	2.57	Quantitation summary for protein	129/126	0.909	49	1.026	*	130/126	1.069	49	[1.032]		131/126	1.524	49	[1.036]		129/127	0.69	49	[1.031]		130/127	0.817	49	1.024	*	131/127	1.168	49	1.024	*	129/128	0.859	49	1.021	*	130/128	1.004
632	gi|124962	RecName: Full=Integrin beta-1; AltName: Full=CSAT antigen; AltName: Full=JG22 antigen; AltName: Full=RGD-receptor; Flags: Precursor	1269	104865	58	53	17	15	19.4	5.23	0.85	Quantitation summary for protein	129/126	1.031	57	[1.030]		130/126	0.908	57	1.055	*	131/126	0.638	57	1.076	*	129/127	1.278	57	[1.051]		130/127	1.133	57	1.039	*	131/127	0.798	57	[1.057]		129/128	0.849	57	1.018	*	130/128	0.743
633	gi|363746863	PREDICTED: bifunctional ATP-dependent dihydroxyacetone kinase/FAD-AMP lyase (cyclizing)-like [Gallus gallus]	1268	16400	32	31	4	4	42	5.19	5.52	Quantitation summary for protein	129/126	1.143	29	1.089	*	130/126	1.218	29	1.149	*	131/126	1.224	29	1.185	*	129/127	1.16	28	1.088	*	130/127	1.303	28	1.133	*	131/127	1.466	27	1.142	*	129/128	0.889	29	1.077	*	130/128	0.941
634	gi|53132373	hypothetical protein RCJMB04_13e11 [Gallus gallus]	1267	88274	57	48	16	16	26.4	6.51	0.93	Quantitation summary for protein	129/126	0.968	49	1.03	*	130/126	1.046	49	1.035	*	131/126	0.959	49	1.055	*	129/127	0.823	49	[1.045]		130/127	0.895	49	[1.023]		131/127	0.823	49	1.047	*	129/128	0.873	49	[1.024]		130/128	0.937
635	gi|53136315	hypothetical protein RCJMB04_27j21 [Gallus gallus]	1263	60504	44	42	11	10	25.6	5.23	1.21	Quantitation summary for protein	129/126	1.074	43	1.031	*	130/126	1.05	43	[1.059]		131/126	1.008	43	[1.127]		129/127	0.935	43	1.053	*	130/127	0.921	43	[1.036]		131/127	0.886	43	1.1	*	129/128	1.185	43	1.019	*	130/128	1.151
636	gi|53127294	hypothetical protein RCJMB04_1l5 [Gallus gallus]	1262	30449	56	48	12	11	40.1	6.46	2.85	Quantitation summary for protein	129/126	0.732	52	1.17	*	130/126	0.997	52	[1.229]		131/126	1.302	52	[1.340]		129/127	0.851	52	1.229	*	130/127	1.168	52	[1.122]		131/127	1.528	52	[1.242]		129/128	0.895	52	1.123	*	130/128	1.213
637	gi|63518	unnamed protein product [Gallus gallus]	1262	34052	40	36	9	8	37.5	5.98	1.78	Quantitation summary for protein	129/126	0.941	38	[1.085]		130/126	0.886	38	[1.114]		131/126	0.854	38	[1.243]		129/127	1.039	38	1.085	*	130/127	0.985	38	[1.102]		131/127	0.952	38	[1.228]		129/128	0.901	38	[1.041]		130/128	0.843
638	gi|212393	myosin alkali light chain [Gallus gallus]	1257	19725	59	45	10	9	70.2	4.52	15.96	Quantitation summary for protein	129/126	0.808	48	[1.087]		130/126	0.927	48	1.046	*	131/126	0.757	48	1.069	*	129/127	0.988	48	[1.101]		130/127	1.142	48	1.035	*	131/127	1.028	47	1.033	*	129/128	0.918	47	1.034	*	130/128	1.041
639	gi|363741946	PREDICTED: ATPase family AAA domain-containing protein 3 [Gallus gallus]	1257	77551	47	43	20	17	29.7	9.34	1.11	Quantitation summary for protein	129/126	0.959	43	1.04	*	130/126	1.066	43	[1.055]		131/126	1.193	43	[1.092]		129/127	0.838	43	[1.052]		130/127	0.938	43	[1.043]		131/127	1.052	43	[1.078]		129/128	0.91	43	[1.034]		130/128	1.005
640	gi|363733989	PREDICTED: EPS8-like 2, partial [Gallus gallus]	1256	93113	61	50	17	14	27.3	7.7	0.8	Quantitation summary for protein	129/126	0.912	52	1.029	*	130/126	0.877	52	[1.064]		131/126	0.786	52	1.078	*	129/127	0.978	52	1.043	*	130/127	0.946	52	[1.052]		131/127	0.85	52	[1.065]		129/128	0.872	52	[1.027]		130/128	0.833
641	gi|363740290	PREDICTED: delta-aminolevulinic acid dehydratase [Gallus gallus]	1256	40282	38	36	11	11	36.9	7.08	2.82	Quantitation summary for protein	129/126	0.98	37	[1.079]		130/126	0.929	37	1.076	*	131/126	0.964	37	1.162		129/127	0.808	37	[1.100]		130/127	0.772	37	1.065	*	131/127	0.802	37	1.15	*	129/128	0.921	37	[1.035]		130/128	0.868
642	gi|62924	haem oxygenase [Gallus gallus]	1255	39503	54	44	15	10	50.3	8.41	2.62	Quantitation summary for protein	129/126	0.915	47	1.05	*	130/126	0.902	47	[1.047]		131/126	0.965	47	[1.085]		129/127	1.181	47	[1.072]		130/127	1.173	47	1.034	*	131/127	1.257	47	[1.073]		129/128	0.772	47	1.038	*	130/128	0.754
643	gi|63606	unnamed protein product [Gallus gallus]	1252	23327	59	48	8	7	50.6	4.8	6.49	Quantitation summary for protein	129/126	0.977	17	1.07		130/126	1.257	17	[1.322]		131/126	1.228	17	1.435	*	129/127	1	17	1.081		130/127	1.295	17	[1.179]		131/127	1.268	17	1.282	*	129/128	1.002	17	1.03		130/128	1.28
644	gi|363735088	PREDICTED: APOBEC1 complementation factor-like isoform 2 [Gallus gallus]	1250	73987	74	62	23	19	40.6	8.8	2.09	Quantitation summary for protein	129/126	0.993	61	[1.034]		130/126	1.125	61	[1.081]		131/126	1.092	61	[1.118]		129/127	0.929	61	[1.070]		130/127	1.06	61	[1.049]		131/127	1.032	61	[1.085]		129/128	1.02	60	1.025	*	130/128	1.148
645	gi|53130302	hypothetical protein RCJMB04_6o1 [Gallus gallus]	1247	42382	58	52	10	10	23.4	9.39	2.08	Quantitation summary for protein	129/126	0.884	42	[1.115]		130/126	1.025	42	1.07	*	131/126	1.083	42	[1.130]		129/127	0.942	42	[1.122]		130/127	1.101	42	1.056	*	131/127	1.165	42	[1.114]		129/128	0.972	42	[1.048]		130/128	1.12
646	gi|363744423	PREDICTED: GTP:AMP phosphotransferase, mitochondrial-like [Gallus gallus]	1245	30253	55	46	15	15	66.5	8.94	9.97	Quantitation summary for protein	129/126	0.852	51	[1.082]		130/126	1.004	51	[1.132]		131/126	1.051	51	[1.180]		129/127	0.792	51	[1.081]		130/127	0.939	51	[1.082]		131/127	0.985	51	[1.121]		129/128	0.85	51	[1.037]		130/128	0.994
647	gi|363734901	PREDICTED: fermitin family homolog 2 isoform 1 [Gallus gallus]	1244	92649	73	62	20	19	33.5	6.22	1.38	Quantitation summary for protein	129/126	1.032	58	[1.034]		130/126	0.966	57	[1.052]		131/126	0.947	57	[1.088]		129/127	1.088	58	1.045	*	130/127	1.025	57	1.034	*	131/127	1.007	57	[1.064]		129/128	1.028	55	1.018	*	130/128	0.955
648	gi|5114446	DEAD-box RNA helicase [Gallus gallus]	1243	74942	68	58	18	18	30.3	8.93	2.18	Quantitation summary for protein	129/126	1.199	35	[1.045]		130/126	0.947	35	[1.080]		131/126	0.801	35	[1.143]		129/127	1.479	35	[1.048]		130/127	1.177	35	1.052	*	131/127	0.997	35	[1.112]		129/128	1.265	35	[1.040]		130/128	0.993
649	gi|53133098	hypothetical protein RCJMB04_14h20 [Gallus gallus]	1241	28144	40	36	7	7	43.6	5.56	1.44	Quantitation summary for protein	129/126	0.928	36	[1.031]		130/126	0.969	35	1.031	*	131/126	1.069	36	[1.038]		129/127	0.829	37	1.029	*	130/127	0.869	37	[1.035]		131/127	0.962	37	[1.032]		129/128	0.928	37	1.027	*	130/128	0.96
650	gi|117258	RecName: Full=Cytochrome P450 2H2; AltName: Full=CYPIIH2; AltName: Full=Cytochrome P450 PCHP7	1240	64182	55	45	16	12	35.6	6.78	1.86	Quantitation summary for protein	129/126	0.511	8	1.109	*	130/126	0.697	8	1.093	*	131/126	0.402	8	[1.330]		129/127	0.885	8	1.104	*	130/127	1.217	8	1.114	*	131/127	0.703	8	[1.315]		129/128	0.471	8	1.08	*	130/128	0.64
651	gi|363741407	PREDICTED: cysteine desulfurase, mitochondrial-like [Gallus gallus]	1239	54172	49	38	13	12	39.8	7.16	1.73	Quantitation summary for protein	129/126	1.01	45	1.037		130/126	1.056	45	1.06	*	131/126	1.042	45	[1.115]		129/127	0.908	45	1.047	*	130/127	0.955	45	1.052	*	131/127	0.945	45	[1.107]		129/128	0.976	45	1.03	*	130/128	1.014
652	gi|118099921	PREDICTED: NADPH:adrenodoxin oxidoreductase, mitochondrial [Gallus gallus]	1237	56655	45	42	16	15	46.1	8.73	2.1	Quantitation summary for protein	129/126	0.925	45	1.039	*	130/126	1.225	45	[1.049]		131/126	1.005	45	1.05		129/127	0.727	45	1.068	*	130/127	0.972	44	1.035	*	131/127	0.797	45	1.055	*	129/128	0.79	45	1.036	*	130/128	1.04
653	gi|6970315	regucalcin [Gallus gallus]	1236	38477	81	60	23	18	64.9	5.77	14.19	Quantitation summary for protein	129/126	0.822	63	1.209	*	130/126	0.817	63	[1.297]		131/126	1.009	61	[1.474]		129/127	0.899	63	1.363	*	130/127	0.9	63	1.145	*	131/127	1.109	61	[1.325]		129/128	0.786	62	1.111	*	130/128	0.773
654	gi|212794	transglutaminase [Gallus gallus]	1236	86533	59	41	17	15	30.5	4.88	1.83	Quantitation summary for protein	129/126	---	1	---		130/126	---	1	---		131/126	---	1	---		129/127	---	1	---		130/127	---	1	---		131/127	---	1	---		129/128	---	1	---		130/128	---
655	gi|53132751	hypothetical protein RCJMB04_13o20 [Gallus gallus]	1236	44741	44	38	12	11	37.9	5.04	2.13	Quantitation summary for protein	129/126	1.045	43	1.033	*	130/126	0.803	43	1.058	*	131/126	0.807	43	1.102	*	129/127	1.045	43	1.047	*	130/127	0.808	43	1.047	*	131/127	0.814	43	1.093	*	129/128	1.063	43	1.032	*	130/128	0.811
656	gi|363728914	PREDICTED: acetylserotonin O-methyltransferase-like isoform 1 [Gallus gallus]	1236	81137	52	47	20	20	39.4	5.96	1.59	Quantitation summary for protein	129/126	1.37	51	1.035	*	130/126	1.107	51	1.039	*	131/126	1.11	51	[1.094]		129/127	1.423	51	1.052	*	130/127	1.158	51	1.045	*	131/127	1.163	51	[1.096]		129/128	1.431	51	1.052	*	130/128	1.149
657	gi|516684	unnamed protein product [Gallus gallus]	1235	30396	86	69	14	13	49.3	11.75	12.39	Quantitation summary for protein	129/126	1.067	78	[1.076]		130/126	0.956	78	[1.086]		131/126	1.153	78	[1.123]		129/127	1.17	78	[1.114]		130/127	1.056	78	1.049	*	131/127	1.276	78	[1.081]		129/128	1.085	78	[1.032]		130/128	0.966
658	gi|62992	transthyretin [Gallus gallus]	1232	18189	35	31	6	5	41.3	5.11	3.62	Quantitation summary for protein	129/126	0.489	32	[1.119]		130/126	0.797	33	1.091	*	131/126	0.555	33	1.191	*	129/127	0.428	32	[1.127]		130/127	0.704	33	1.058	*	131/127	0.492	33	[1.146]		129/128	0.581	32	[1.106]		130/128	0.945
659	gi|53127836	hypothetical protein RCJMB04_4e8 [Gallus gallus]	1231	62919	54	48	11	11	16	8.59	1.15	Quantitation summary for protein	129/126	1.105	49	[1.065]		130/126	0.806	49	[1.120]		131/126	0.418	49	[1.181]		129/127	1.548	49	1.123	*	130/127	1.136	49	1.05	*	131/127	0.591	49	1.106	*	129/128	0.837	49	[1.029]		130/128	0.606
660	gi|26449182	Translocating chain-associated membrane protein [Gallus gallus]	1230	49217	37	35	3	3	5.3	9.59	0.3	Quantitation summary for protein	129/126	1.115	34	[1.050]		130/126	1.126	34	1.042	*	131/126	1.347	34	[1.045]		129/127	1.29	34	1.058	*	130/127	1.311	34	1.036	*	131/127	1.573	34	1.039	*	129/128	1.218	34	1.044	*	130/128	1.221
661	gi|50755563	PREDICTED: 28 kDa heat- and acid-stable phosphoprotein [Gallus gallus]	1229	27004	56	48	11	10	42.2	7.79	3.55	Quantitation summary for protein	129/126	0.941	53	[1.073]		130/126	0.921	53	[1.129]		131/126	1.046	53	[1.218]		129/127	0.904	53	[1.152]		130/127	0.891	53	1.054	*	131/127	1.015	53	[1.129]		129/128	1.122	53	1.043	*	130/128	1.092
662	gi|363740811	PREDICTED: 26S proteasome non-ATPase regulatory subunit 12-like isoform 1 [Gallus gallus]	1229	63056	58	49	17	13	32.9	6.28	1.5	Quantitation summary for protein	129/126	1.255	52	[1.043]		130/126	0.994	51	1.043		131/126	0.781	52	1.104	*	129/127	1.31	52	[1.044]		130/127	1.041	52	1.032	*	131/127	0.822	52	1.09	*	129/128	1.28	51	1.018	*	130/128	1.008
663	gi|53127640	hypothetical protein RCJMB04_2m19 [Gallus gallus]	1228	32451	41	37	10	9	49.8	8.54	2.92	Quantitation summary for protein	129/126	0.741	35	[1.122]		130/126	0.789	36	1.117	*	131/126	0.858	36	1.227	*	129/127	0.774	36	1.171	*	130/127	0.838	36	1.071	*	131/127	0.902	37	1.181	*	129/128	0.777	36	1.051	*	130/128	0.824
664	gi|53127340	hypothetical protein RCJMB04_1o7 [Gallus gallus]	1228	25702	38	34	12	9	65.2	9.18	5.23	Quantitation summary for protein	129/126	0.659	35	1.146	*	130/126	0.86	35	[1.108]		131/126	1.233	35	[1.149]		129/127	0.583	35	[1.142]		130/127	0.766	35	1.115	*	131/127	1.101	35	1.146	*	129/128	0.699	35	1.106	*	130/128	0.907
665	gi|50751550	PREDICTED: fatty-acid amide hydrolase 1 [Gallus gallus]	1227	72696	58	50	14	13	25.5	7.47	1.21	Quantitation summary for protein	129/126	1.208	56	1.027	*	130/126	1.124	56	1.036	*	131/126	0.722	56	[1.058]		129/127	1.317	56	1.039	*	130/127	1.234	56	1.031	*	131/127	0.795	56	[1.045]		129/128	0.916	55	1.015	*	130/128	0.846
666	gi|1783320	CYP1A5 [Gallus gallus]	1224	68051	71	64	18	16	31.4	7.62	1.96	Quantitation summary for protein	129/126	0.632	65	1.042	*	130/126	0.968	65	1.05	*	131/126	0.552	65	1.072	*	129/127	0.635	65	[1.060]		130/127	0.979	65	[1.031]		131/127	0.56	65	1.059	*	129/128	0.392	65	[1.058]		130/128	0.596
667	gi|53136648	hypothetical protein RCJMB04_32b9 [Gallus gallus]	1222	56303	51	47	19	15	37.4	5.44	2.3	Quantitation summary for protein	129/126	0.96	47	1.044	*	130/126	1.067	47	1.046	*	131/126	0.855	47	1.095	*	129/127	0.947	47	[1.064]		130/127	1.059	47	1.044	*	131/127	0.825	45	1.077	*	129/128	0.975	47	[1.027]		130/128	1.077
668	gi|50761912	PREDICTED: protein NipSnap homolog 3A [Gallus gallus]	1221	31744	70	47	10	8	42	9.46	5	Quantitation summary for protein	129/126	1.023	61	1.071	*	130/126	1.783	61	1.11	*	131/126	1.796	61	[1.163]		129/127	0.615	61	[1.141]		130/127	1.073	60	1.06	*	131/127	1.09	61	[1.127]		129/128	0.994	61	1.04		130/128	1.722
669	gi|53133330	hypothetical protein RCJMB04_15i13 [Gallus gallus]	1218	63568	52	48	16	15	36.6	8.38	1.6	Quantitation summary for protein	129/126	0.959	48	[1.055]		130/126	1.077	48	1.046	*	131/126	1.478	48	1.068	*	129/127	0.775	48	[1.090]		130/127	0.876	48	[1.038]		131/127	1.205	48	1.046	*	129/128	1.025	48	1.031	*	130/128	1.143
670	gi|50731684	PREDICTED: regulator of microtubule dynamics protein 1 [Gallus gallus]	1218	39935	59	50	14	13	46.7	7.66	2.87	Quantitation summary for protein	129/126	0.824	53	1.045	*	130/126	0.799	53	[1.112]		131/126	0.989	53	[1.143]		129/127	0.721	53	[1.065]		130/127	0.704	53	1.077	*	131/127	0.783	52	1.088	*	129/128	0.867	53	1.044	*	130/128	0.836
671	gi|363736974	PREDICTED: serine--pyruvate aminotransferase, mitochondrial [Gallus gallus]	1218	46360	50	44	12	10	37.8	7.68	2.95	Quantitation summary for protein	129/126	1.033	48	1.046	*	130/126	1.024	48	[1.090]		131/126	1.167	48	[1.173]		129/127	0.966	48	[1.052]		130/127	0.964	48	1.079	*	131/127	1.101	48	[1.158]		129/128	0.836	48	1.027	*	130/128	0.824
672	gi|363744458	PREDICTED: UPF0553 protein C9orf64 isoform 1 [Gallus gallus]	1214	44993	51	48	14	13	39.6	5.82	2.34	Quantitation summary for protein	129/126	1.137	48	1.031	*	130/126	0.931	49	[1.049]		131/126	0.777	49	1.075	*	129/127	1.141	49	1.051	*	130/127	0.952	49	[1.037]		131/127	0.795	46	1.051	*	129/128	0.939	49	[1.023]		130/128	0.773
673	gi|63434	unnamed protein product [Gallus gallus]	1213	18955	40	34	8	5	51.6	10.27	7.37	Quantitation summary for protein	129/126	1.017	37	1.064		130/126	1.19	37	1.056	*	131/126	1.67	37	1.083	*	129/127	1.146	37	1.088	*	130/127	1.35	37	1.079	*	131/127	1.898	37	1.091	*	129/128	1.056	37	1.066	*	130/128	1.228
674	gi|88909611	RecName: Full=Elongation factor Tu, mitochondrial; Short=EF-Tu; Flags: Precursor	1210	41032	51	44	16	14	62.8	8.98	3.7	Quantitation summary for protein	129/126	0.852	46	1.055	*	130/126	1.201	45	1.053	*	131/126	0.866	46	1.083	*	129/127	0.818	46	1.064	*	130/127	1.159	46	1.045	*	131/127	0.839	46	1.081	*	129/128	0.958	46	1.053	*	130/128	1.34
675	gi|50749406	PREDICTED: eukaryotic translation initiation factor 3 subunit F [Gallus gallus]	1210	38099	31	28	8	8	28.6	5.34	1.5	Quantitation summary for protein	129/126	1.044	30	1.031	*	130/126	0.963	30	1.049	*	131/126	1.041	30	[1.077]		129/127	1.014	30	1.034	*	130/127	0.942	30	1.047	*	131/127	1.02	30	[1.078]		129/128	1.166	29	1.03	*	130/128	1.066
676	gi|363745122	PREDICTED: aldo-keto reductase family 1 member B10-like [Gallus gallus]	1207	42375	73	60	16	14	45.3	6.6	5.06	Quantitation summary for protein	129/126	1.611	4	1.044	*	130/126	0.509	4	1.042	*	131/126	0.414	4	1.198	*	129/127	3.118	4	1.099	*	130/127	1	3	1.023		131/127	0.808	4	1.128	*	129/128	0.751	4	1.027	*	130/128	0.236
677	gi|363734138	PREDICTED: acyl-CoA synthetase short-chain family member 1-like [Gallus gallus]	1206	85560	53	43	17	12	25.5	7	1.12	Quantitation summary for protein	129/126	1.395	40	[1.061]		130/126	1.178	40	1.072	*	131/126	0.841	40	1.108	*	129/127	1.194	40	[1.075]		130/127	1.015	40	[1.069]		131/127	0.726	40	1.108	*	129/128	0.987	40	1.043		130/128	0.828
678	gi|363732599	PREDICTED: probable phospholipid-transporting ATPase IG [Gallus gallus]	1205	149162	46	43	13	10	13.6	6.91	0.38	Quantitation summary for protein	129/126	1.178	41	1.024	*	130/126	1.013	41	[1.038]		131/126	0.782	41	[1.069]		129/127	1.503	41	1.051	*	130/127	1.301	41	[1.049]		131/127	1.007	41	[1.059]		129/128	1.144	41	1.029	*	130/128	0.977
679	gi|60098917	hypothetical protein RCJMB04_15e19 [Gallus gallus]	1203	34790	49	47	11	11	42.1	5.85	2.93	Quantitation summary for protein	129/126	1.325	47	[1.065]		130/126	0.832	47	[1.059]		131/126	0.933	47	[1.128]		129/127	1.46	47	[1.108]		130/127	0.922	47	1.033	*	131/127	1.037	47	[1.084]		129/128	1.174	47	1.031	*	130/128	0.732
680	gi|382545825	60S ribosomal protein L9 [Gallus gallus]	1200	25832	69	50	11	8	59.9	10.08	9.04	Quantitation summary for protein	129/126	1.026	60	1.06	*	130/126	1.104	57	1.059	*	131/126	1.2	57	1.067	*	129/127	0.879	59	1.074	*	130/127	0.952	57	[1.053]		131/127	1.022	58	1.06	*	129/128	1.092	60	1.047	*	130/128	1.167
681	gi|4572456	vitamin-D binding protein precursor [Gallus gallus]	1199	63153	45	41	15	13	37.8	6.47	1.37	Quantitation summary for protein	129/126	1.118	43	[1.056]		130/126	0.991	43	1.052		131/126	0.918	42	1.089	*	129/127	1.032	43	[1.077]		130/127	0.92	43	1.032	*	131/127	0.808	43	[1.079]		129/128	0.982	43	1.036	*	130/128	0.864
682	gi|53126617	hypothetical protein RCJMB04_1f8 [Gallus gallus]	1196	60093	46	33	15	11	35.8	8.54	1.35	Quantitation summary for protein	129/126	1.249	40	1.05	*	130/126	0.848	40	1.06	*	131/126	0.861	40	1.104	*	129/127	1.284	40	1.073	*	130/127	0.877	40	1.048	*	131/127	0.893	40	1.091	*	129/128	1.139	40	[1.035]		130/128	0.768
683	gi|60099127	hypothetical protein RCJMB04_28a6 [Gallus gallus]	1194	86160	52	40	19	16	29.7	9.11	1.11	Quantitation summary for protein	129/126	1.538	47	[1.038]		130/126	1.033	47	1.043	*	131/126	1.244	47	[1.071]		129/127	1.586	47	[1.068]		130/127	1.072	47	1.03	*	131/127	1.294	47	[1.047]		129/128	1.529	47	[1.034]		130/128	1.02
684	gi|363734605	PREDICTED: catenin delta-1 [Gallus gallus]	1192	119672	53	47	15	13	16.8	5.94	0.58	Quantitation summary for protein	129/126	0.968	52	[1.038]		130/126	1.084	52	[1.042]		131/126	0.874	52	1.062	*	129/127	1.162	52	[1.059]		130/127	1.311	52	[1.040]		131/127	1.06	52	1.048	*	129/128	0.94	52	[1.027]		130/128	1.046
685	gi|226437575	NADH dehydrogenase [ubiquinone] iron-sulfur protein 3, mitochondrial [Gallus gallus]	1192	32536	56	43	16	13	52.1	6.55	7.49	Quantitation summary for protein	129/126	0.899	46	[1.060]		130/126	1.155	46	[1.088]		131/126	1.709	46	[1.116]		129/127	0.745	46	[1.071]		130/127	0.963	46	[1.087]		131/127	1.429	46	[1.108]		129/128	0.842	46	[1.056]		130/128	1.075
686	gi|307078119	splicing factor, arginine/serine-rich 3 [Gallus gallus]	1189	20921	62	51	8	7	42.1	11.64	3.45	Quantitation summary for protein	129/126	0.892	52	[1.045]		130/126	0.894	52	[1.065]		131/126	0.887	52	[1.120]		129/127	0.979	52	[1.081]		130/127	0.989	52	1.031	*	131/127	0.983	52	[1.084]		129/128	0.926	52	1.017	*	130/128	0.922
687	gi|53127891	hypothetical protein RCJMB04_4e21 [Gallus gallus]	1186	42952	74	56	9	7	23.3	9.33	3.09	Quantitation summary for protein	129/126	0.926	68	1.058	*	130/126	1.064	68	[1.061]		131/126	0.753	68	1.064	*	129/127	1.042	68	[1.067]		130/127	1.205	68	1.055	*	131/127	0.855	68	1.052	*	129/128	0.867	68	1.027	*	130/128	0.989
688	gi|53126116	hypothetical protein RCJMB04_1a12 [Gallus gallus]	1185	69227	41	34	14	10	24.5	7.03	1	Quantitation summary for protein	129/126	1.047	36	1.044	*	130/126	1.098	36	1.047	*	131/126	0.889	36	[1.112]		129/127	1.142	36	1.055	*	130/127	1.206	36	1.056	*	131/127	0.948	35	1.092	*	129/128	0.974	36	1.032	*	130/128	1.015
689	gi|363728195	PREDICTED: 3-oxo-5-beta-steroid 4-dehydrogenase isoform 2 [Gallus gallus]	1184	43449	76	54	21	14	61.3	6.33	6.25	Quantitation summary for protein	129/126	1.606	60	[1.094]		130/126	1.156	60	1.086	*	131/126	1.019	60	[1.198]		129/127	1.208	60	[1.109]		130/127	0.875	60	1.059	*	131/127	0.773	60	[1.171]		129/128	1.378	60	1.067	*	130/128	0.985
690	gi|129270064	ribosomal protein S3A [Gallus gallus]	1184	39013	77	56	19	13	55.7	9.74	6.68	Quantitation summary for protein	129/126	1.113	69	[1.052]		130/126	1.037	69	[1.071]		131/126	1.144	69	[1.145]		129/127	0.999	69	[1.046]		130/127	0.936	69	[1.055]		131/127	1.036	69	[1.129]		129/128	1.139	68	1.019	*	130/128	1.053
691	gi|53130844	hypothetical protein RCJMB04_10g10 [Gallus gallus]	1180	33308	51	49	11	10	46.2	4.81	3.57	Quantitation summary for protein	129/126	1.019	20	1.031	*	130/126	1.055	20	[1.084]		131/126	0.743	20	1.13	*	129/127	0.99	20	1.054		130/127	1.032	20	1.053	*	131/127	0.729	20	1.087	*	129/128	1.047	20	1.04	*	130/128	1.077
692	gi|363744898	PREDICTED: methylcrotonoyl-CoA carboxylase beta chain, mitochondrial [Gallus gallus]	1179	68085	44	38	12	10	27.5	7.94	1.23	Quantitation summary for protein	129/126	1.043	42	1.045	*	130/126	1.068	42	[1.068]		131/126	1.299	42	[1.096]		129/127	0.892	42	1.051	*	130/127	0.92	42	[1.054]		131/127	1.121	42	[1.085]		129/128	0.965	42	1.035	*	130/128	0.982
693	gi|114378	RecName: Full=Sodium/potassium-transporting ATPase subunit alpha-2; Short=Na(+)/K(+) ATPase alpha-2 subunit; AltName: Full=Sodium pump subunit alpha-2	1173	125207	43	38	12	12	15.7	5.43	0.55	Quantitation summary for protein	129/126	1.274	2	1.101		130/126	1.171	2	1.111		131/126	0.952	2	1.282		129/127	1.382	2	1.046		130/127	1.279	2	1.056		131/127	1.043	2	1.218		129/128	1.082	2	1.124		130/128	0.988
694	gi|363735661	PREDICTED: PDZ and LIM domain protein 1 isoform 4 [Gallus gallus]	1171	52905	58	46	14	13	36.2	7.22	1.96	Quantitation summary for protein	129/126	1.013	50	1.027	*	130/126	1.018	51	[1.052]		131/126	1.157	51	1.087	*	129/127	1.02	51	[1.046]		130/127	1.033	51	1.039	*	131/127	1.177	51	[1.076]		129/128	0.998	51	1.025		130/128	0.998
695	gi|62938	myosin regulatory light chain, isoform L20-B1 [Gallus gallus]	1170	23393	57	45	8	8	50.6	4.67	11.66	Quantitation summary for protein	129/126	0.908	13	1.106	*	130/126	1.162	13	[1.378]		131/126	1.198	13	1.48		129/127	1.057	13	1.108		130/127	1.362	13	1.187	*	131/127	1.408	13	1.283	*	129/128	0.991	13	[1.058]		130/128	1.26
696	gi|127513	RecName: Full=Ig mu chain C region	1169	52723	54	45	10	8	26.2	6.07	1.8	Quantitation summary for protein	129/126	0.792	51	1.041	*	130/126	1.231	51	1.028	*	131/126	0.888	51	[1.074]		129/127	0.891	51	[1.029]		130/127	1.395	51	1.042	*	131/127	1.009	51	[1.061]		129/128	0.893	51	1.027	*	130/128	1.379
697	gi|63227	unnamed protein product [Gallus gallus]	1163	49316	51	45	14	13	49.9	5.93	2.9	Quantitation summary for protein	129/126	0.788	45	[1.051]		130/126	0.758	45	[1.067]		131/126	0.683	46	[1.079]		129/127	1.255	45	1.048	*	130/127	1.219	45	[1.069]		131/127	1.096	46	[1.071]		129/128	0.821	44	[1.046]		130/128	0.784
698	gi|50760435	PREDICTED: 60S ribosomal protein L10a [Gallus gallus]	1161	32884	64	48	10	9	36.9	9.88	3.24	Quantitation summary for protein	129/126	1.294	55	[1.090]		130/126	1.2	55	1.051	*	131/126	1.138	55	[1.159]		129/127	1.41	55	[1.109]		130/127	1.316	55	[1.061]		131/127	1.251	55	[1.169]		129/128	1.19	55	1.038	*	130/128	1.096
699	gi|53127520	hypothetical protein RCJMB04_2m6 [Gallus gallus]	1160	23600	42	35	7	7	35.4	6.84	5.38	Quantitation summary for protein	129/126	0.978	19	[1.056]		130/126	0.814	19	1.12	*	131/126	0.465	19	1.269	*	129/127	1.479	19	[1.097]		130/127	1.24	19	1.079	*	131/127	0.709	19	[1.253]		129/128	1.107	19	1.026	*	130/128	0.916
700	gi|93209536	GTP-binding protein [Gallus gallus]	1158	27027	43	38	11	11	57.2	5.42	5.46	Quantitation summary for protein	129/126	1.006	42	[1.026]		130/126	0.905	42	[1.056]		131/126	0.674	42	1.108	*	129/127	1.329	42	[1.044]		130/127	1.204	42	[1.043]		131/127	0.829	41	1.078	*	129/128	1.06	42	[1.023]		130/128	0.947
701	gi|363745440	PREDICTED: importin subunit beta-1-like [Gallus gallus]	1154	106649	57	48	19	17	25.1	4.69	1.19	Quantitation summary for protein	129/126	1.15	53	1.036	*	130/126	0.977	53	1.043	*	131/126	0.688	53	1.071	*	129/127	1.457	52	1.047	*	130/127	1.257	53	1.043	*	131/127	0.887	53	1.056	*	129/128	1.047	53	1.022	*	130/128	0.883
702	gi|363741846	PREDICTED: GDH/6PGL endoplasmic bifunctional protein [Gallus gallus]	1152	97513	57	49	14	14	16.1	6.51	0.7	Quantitation summary for protein	129/126	1.246	56	1.032	*	130/126	1.025	56	[1.041]		131/126	1.35	56	1.053	*	129/127	1.254	56	1.054	*	130/127	1.038	55	1.031	*	131/127	1.372	56	1.045	*	129/128	1.346	56	[1.035]		130/128	1.101
703	gi|53127678	hypothetical protein RCJMB04_2o24 [Gallus gallus]	1150	68003	65	54	20	19	40.7	6.11	3.31	Quantitation summary for protein	129/126	1.088	58	1.076	*	130/126	0.995	59	1.134		131/126	0.854	59	[1.219]		129/127	1.097	60	[1.134]		130/127	1.011	60	[1.102]		131/127	0.87	60	[1.176]		129/128	1.069	59	[1.066]		130/128	0.971
704	gi|2511456	beta catenin [Gallus gallus]	1148	92199	46	43	14	13	20	5.48	0.87	Quantitation summary for protein	129/126	1.153	27	1.028	*	130/126	1.1	27	1.034	*	131/126	0.878	27	1.042	*	129/127	1.18	27	1.038	*	130/127	1.134	27	1.044	*	131/127	0.907	27	1.051	*	129/128	1.023	27	[1.025]		130/128	0.97
705	gi|114380	RecName: Full=Sodium/potassium-transporting ATPase subunit alpha-3; Short=Na(+)/K(+) ATPase alpha-3 subunit; AltName: Full=Na(+)/K(+) ATPase alpha(III) subunit; AltName: Full=Sodium pump subunit alpha-3	1147	125758	46	39	12	12	15.5	5.23	0.55	Quantitation summary for protein	129/126	1.188	4	1.016	*	130/126	1.229	4	1.027	*	131/126	0.978	3	1.014		129/127	1.252	4	1.031	*	130/127	1.304	4	1.03	*	131/127	1.095	4	1.02	*	129/128	1.019	4	1.02		130/128	1.047
706	gi|459642348	ankyrin 3, node of Ranvier (ankyrin G) [Gallus gallus]	1145	563603	64	45	22	17	5.8	6.06	0.13	Quantitation summary for protein	129/126	0.857	41	1.034	*	130/126	1.157	42	[1.048]		131/126	0.857	41	1.055	*	129/127	0.843	42	1.059	*	130/127	1.143	42	[1.042]		131/127	0.861	42	1.069	*	129/128	0.889	42	1.027	*	130/128	1.189
707	gi|363736402	PREDICTED: antithrombin-III [Gallus gallus]	1144	59409	64	53	19	14	38.2	5.75	2.46	Quantitation summary for protein	129/126	0.883	60	[1.065]		130/126	0.897	60	1.088	*	131/126	0.885	60	1.118	*	129/127	0.761	60	[1.125]		130/127	0.779	60	1.037	*	131/127	0.77	60	1.071	*	129/128	0.802	60	[1.032]		130/128	0.81
708	gi|53133602	hypothetical protein RCJMB04_18g17 [Gallus gallus]	1144	21347	36	33	7	6	27.8	5.95	4.78	Quantitation summary for protein	129/126	1.126	33	[1.151]		130/126	0.756	33	1.152	*	131/126	0.821	33	1.268	*	129/127	1.311	33	[1.244]		130/127	0.887	33	1.067	*	131/127	0.965	33	1.168		129/128	1.183	33	1.051	*	130/128	0.79
709	gi|363734949	PREDICTED: inverted formin-2 [Gallus gallus]	1143	185170	63	47	17	15	13.2	5.93	0.39	Quantitation summary for protein	129/126	0.673	49	1.092	*	130/126	0.67	49	[1.045]		131/126	0.46	49	[1.100]		129/127	0.976	49	1.094		130/127	0.977	49	[1.056]		131/127	0.672	49	[1.104]		129/128	0.723	49	[1.052]		130/128	0.715
710	gi|363730157	PREDICTED: LOW QUALITY PROTEIN: golgin subfamily A member 4 [Gallus gallus]	1140	325118	92	58	38	26	16.2	5.22	0.36	Quantitation summary for protein	129/126	1.097	66	1.025	*	130/126	0.903	66	[1.031]		131/126	0.711	66	1.044	*	129/127	1.242	66	[1.036]		130/127	1.029	66	[1.026]		131/127	0.812	66	1.035	*	129/128	1.151	66	[1.017]		130/128	0.941
711	gi|50764028	PREDICTED: aldo-keto reductase family 1 member B10 [Gallus gallus]	1140	42291	69	55	17	14	46.8	6.8	4.23	Quantitation summary for protein	129/126	1.079	12	1.1	*	130/126	0.623	12	1.132	*	131/126	0.559	12	1.25	*	129/127	1.313	12	1.174	*	130/127	0.763	12	1.065	*	131/127	0.687	12	1.177	*	129/128	0.955	12	1.025	*	130/128	0.547
712	gi|313661460	exportin-1 [Gallus gallus]	1139	138655	34	33	13	12	15.4	5.74	0.42	Quantitation summary for protein	129/126	1.07	33	[1.106]		130/126	0.966	33	[1.059]		131/126	0.548	33	1.12	*	129/127	1.443	33	[1.083]		130/127	1.311	33	1.051	*	131/127	0.746	33	1.113	*	129/128	1.017	33	[1.043]		130/128	0.912
713	gi|12034955	manganese-containing superoxide dismutase precursor [Gallus gallus]	1138	28596	56	43	7	5	28.6	8.6	5.49	Quantitation summary for protein	129/126	0.661	51	1.068	*	130/126	0.853	51	[1.121]		131/126	0.826	51	[1.173]		129/127	0.614	51	[1.097]		130/127	0.799	51	1.094	*	131/127	0.775	51	1.122	*	129/128	0.78	51	[1.074]		130/128	1.001
714	gi|4959548	glutathione S-transferase class-alpha [Gallus gallus]	1137	30350	74	44	12	9	48.9	8.92	7.91	Quantitation summary for protein	129/126	0.982	46	[1.102]		130/126	0.933	46	1.073	*	131/126	0.927	46	[1.150]		129/127	1.119	46	[1.120]		130/127	1.07	46	[1.093]		131/127	1.066	46	[1.164]		129/128	1.256	45	1.079	*	130/128	1.237
715	gi|3746660	otokeratin [Gallus gallus]	1136	61104	63	54	12	11	20.7	5.97	1.57	Quantitation summary for protein	129/126	1.458	12	[1.311]		130/126	0.743	12	1.281	*	131/126	1.303	11	1.1	*	129/127	1.029	12	[1.221]		130/127	0.528	12	[1.362]		131/127	0.915	12	[1.187]		129/128	1.912	12	[1.290]		130/128	0.968
716	gi|60098469	hypothetical protein RCJMB04_2k14 [Gallus gallus]	1135	87606	50	45	19	18	33.5	6.17	1.33	Quantitation summary for protein	129/126	0.836	46	1.043	*	130/126	0.979	46	[1.061]		131/126	0.888	46	[1.087]		129/127	0.899	46	1.051	*	130/127	1.059	46	1.044	*	131/127	0.963	46	1.081	*	129/128	0.914	46	1.039	*	130/128	1.063
717	gi|118088890	PREDICTED: 40S ribosomal protein S7 isoform 6 [Gallus gallus]	1134	41832	67	52	13	11	41	9.89	8.07	Quantitation summary for protein	129/126	1.074	60	[1.080]		130/126	1.277	60	[1.162]		131/126	1.916	60	[1.273]		129/127	0.854	60	[1.095]		130/127	1.022	60	[1.109]		131/127	1.537	60	[1.230]		129/128	1.119	59	[1.071]		130/128	1.324
718	gi|53126205	hypothetical protein RCJMB04_1b5 [Gallus gallus]	1133	19708	50	41	14	12	79.5	5.43	13.49	Quantitation summary for protein	129/126	0.857	45	[1.164]		130/126	0.893	45	1.1	*	131/126	1.25	44	1.211	*	129/127	0.913	44	[1.220]		130/127	0.959	44	1.077	*	131/127	1.345	44	1.16	*	129/128	0.902	45	[1.109]		130/128	0.933
719	gi|6855513	syndesmos [Gallus gallus]	1132	36270	56	49	12	12	37.8	5.74	3.42	Quantitation summary for protein	129/126	0.962	54	1.029	*	130/126	1.031	54	[1.058]		131/126	1.054	54	[1.095]		129/127	0.943	54	[1.051]		130/127	1.018	53	1.035	*	131/127	1.042	54	[1.071]		129/128	1.004	54	1.029		130/128	1.068
720	gi|53127806	hypothetical protein RCJMB04_3h11 [Gallus gallus]	1131	89174	50	45	23	19	35.1	6.71	1.75	Quantitation summary for protein	129/126	1.212	48	1.041	*	130/126	0.952	48	1.075	*	131/126	0.786	48	1.136	*	129/127	1.297	48	1.08	*	130/127	1.025	48	1.041	*	131/127	0.849	48	1.1	*	129/128	1.131	48	1.026	*	130/128	0.883
721	gi|387587	Jun-binding protein, partial [Gallus gallus]	1130	29698	46	41	9	8	44.8	10.14	3.91	Quantitation summary for protein	129/126	1.155	44	1.034	*	130/126	0.977	44	1.042	*	131/126	0.848	44	1.062	*	129/127	1.049	44	1.044	*	130/127	0.894	44	1.03	*	131/127	0.778	44	1.053	*	129/128	1.145	44	1.031	*	130/128	0.962
722	gi|53133158	hypothetical protein RCJMB04_14j19 [Gallus gallus]	1130	80427	53	43	16	14	27.7	8.56	1.31	Quantitation summary for protein	129/126	1.084	47	1.043	*	130/126	0.988	47	1.05		131/126	0.829	47	1.077	*	129/127	1.084	47	1.05	*	130/127	0.995	47	[1.051]		131/127	0.836	47	1.067	*	129/128	1.029	47	1.027	*	130/128	0.931
723	gi|118103065	PREDICTED: mitochondrial import inner membrane translocase subunit TIM44 [Gallus gallus]	1130	62574	61	51	21	18	38.6	8.29	2.25	Quantitation summary for protein	129/126	0.969	53	[1.064]		130/126	0.979	53	[1.071]		131/126	0.927	53	[1.141]		129/127	0.909	53	[1.071]		130/127	0.924	53	[1.063]		131/127	0.877	53	[1.137]		129/128	1.012	53	[1.051]		130/128	1.015
724	gi|363737670	PREDICTED: tight junction protein ZO-1 [Gallus gallus]	1128	210812	41	36	17	16	13.7	6.3	0.3	Quantitation summary for protein	129/126	0.883	38	1.037	*	130/126	1.013	38	1.04		131/126	1.085	38	[1.088]		129/127	1.027	38	1.044	*	130/127	1.173	37	1.037	*	131/127	1.274	38	[1.090]		129/128	0.968	38	1.029	*	130/128	1.088
725	gi|403048721	phenylalanine--tRNA ligase alpha subunit [Gallus gallus]	1127	62100	33	33	9	9	22	8.74	1.06	Quantitation summary for protein	129/126	0.978	33	1.049	*	130/126	1.074	33	[1.035]		131/126	1.119	33	1.058	*	129/127	0.939	33	[1.061]		130/127	1.038	33	1.03	*	131/127	1.084	33	1.052	*	129/128	0.94	33	1.036	*	130/128	1.025
726	gi|60098551	hypothetical protein RCJMB04_3l6 [Gallus gallus]	1122	75577	52	40	12	9	20.7	5.93	0.97	Quantitation summary for protein	129/126	1.297	48	[1.034]		130/126	1.017	48	[1.045]		131/126	0.674	48	[1.086]		129/127	1.624	48	[1.053]		130/127	1.283	48	1.039	*	131/127	0.853	48	[1.063]		129/128	1.198	47	1.017	*	130/128	0.936
727	gi|363736219	PREDICTED: bile salt export pump [Gallus gallus]	1122	167383	70	41	30	20	23.8	8.49	0.79	Quantitation summary for protein	129/126	0.925	49	1.027	*	130/126	1.145	50	[1.045]		131/126	0.778	50	1.102	*	129/127	0.942	50	[1.042]		130/127	1.169	50	[1.037]		131/127	0.796	50	1.084	*	129/128	0.733	49	1.031	*	130/128	0.902
728	gi|50745878	PREDICTED: sterol-4-alpha-carboxylate 3-dehydrogenase, decarboxylating [Gallus gallus]	1121	45659	46	39	11	8	32.4	8.55	1.31	Quantitation summary for protein	129/126	1.6	43	[1.057]		130/126	1.115	43	[1.076]		131/126	0.615	43	1.143	*	129/127	1.596	43	1.084	*	130/127	1.12	43	[1.052]		131/127	0.559	42	1.108	*	129/128	1.953	43	1.055	*	130/128	1.352
729	gi|118085706	PREDICTED: glycylpeptide N-tetradecanoyltransferase 2 [Gallus gallus]	1120	67429	43	39	13	11	26.7	7.18	1.14	Quantitation summary for protein	129/126	1.015	25	1.038		130/126	0.904	24	1.033	*	131/126	0.853	25	1.076	*	129/127	1.056	25	[1.047]		130/127	0.932	25	1.039	*	131/127	0.895	25	1.067	*	129/128	1.019	25	1.025	*	130/128	0.887
730	gi|53133308	hypothetical protein RCJMB04_15f6 [Gallus gallus]	1118	87887	51	44	19	17	34.1	5.84	1.16	Quantitation summary for protein	129/126	0.973	40	1.039	*	130/126	0.797	40	1.05	*	131/126	0.926	39	1.096	*	129/127	1.162	40	[1.050]		130/127	0.959	40	[1.031]		131/127	1.118	39	1.081	*	129/128	0.985	40	1.026	*	130/128	0.802
731	gi|311213923	fibronectin precursor [Gallus gallus]	1113	294544	51	39	19	15	10.1	5.43	0.27	Quantitation summary for protein	129/126	1.167	44	1.043	*	130/126	1.346	44	[1.062]		131/126	1.715	44	[1.095]		129/127	1.057	44	[1.041]		130/127	1.227	44	[1.052]		131/127	1.567	44	[1.082]		129/128	1.229	44	[1.036]		130/128	1.408
732	gi|363739222	PREDICTED: septin-8 [Gallus gallus]	1111	67920	52	47	11	8	18.3	7.97	0.68	Quantitation summary for protein	129/126	1.213	16	[1.059]		130/126	0.851	16	[1.075]		131/126	0.692	15	1.103	*	129/127	1.227	16	[1.080]		130/127	0.867	16	1.053	*	131/127	0.605	16	1.115	*	129/128	1.038	14	1.014	*	130/128	0.779
733	gi|53131814	hypothetical protein RCJMB04_12d24 [Gallus gallus]	1108	77735	39	32	14	10	27.4	5.26	0.78	Quantitation summary for protein	129/126	1.135	32	1.097	*	130/126	1.153	31	[1.088]		131/126	1.221	32	1.135	*	129/127	0.999	32	[1.138]		130/127	0.987	32	1.061		131/127	1.051	32	1.113	*	129/128	1.115	32	1.059	*	130/128	1.085
734	gi|363740902	PREDICTED: LOW QUALITY PROTEIN: RING finger protein 213 [Gallus gallus]	1108	618299	56	41	26	18	6	6.17	0.12	Quantitation summary for protein	129/126	0.799	44	1.031	*	130/126	0.573	44	1.056	*	131/126	0.467	44	1.112	*	129/127	1.675	44	1.047	*	130/127	1.209	44	1.042	*	131/127	0.987	44	1.072		129/128	0.856	44	[1.023]		130/128	0.609
735	gi|212589	p80/85 [Gallus gallus]	1104	77211	36	29	11	9	24.7	5.33	0.65	Quantitation summary for protein	129/126	0.949	33	1.035	*	130/126	1.03	33	[1.068]		131/126	0.899	33	[1.114]		129/127	1.028	33	[1.057]		130/127	1.124	33	[1.043]		131/127	0.983	33	[1.091]		129/128	0.974	33	1.026	*	130/128	1.051
736	gi|363729389	PREDICTED: dipeptidyl peptidase 1 [Gallus gallus]	1104	58056	47	42	9	8	21.5	7.85	0.94	Quantitation summary for protein	129/126	0.737	41	1.079	*	130/126	0.86	42	1.064	*	131/126	0.924	42	1.098	*	129/127	0.765	42	[1.107]		130/127	0.891	42	1.067	*	131/127	0.959	42	1.079	*	129/128	0.848	42	1.052	*	130/128	0.974
737	gi|363739691	PREDICTED: LOW QUALITY PROTEIN: peroxisomal 2,4-dienoyl-CoA reductase-like [Gallus gallus]	1100	35509	38	33	13	12	43	9.06	3.98	Quantitation summary for protein	129/126	0.927	36	[1.059]		130/126	1.004	36	1.053		131/126	1.298	36	[1.117]		129/127	0.814	36	[1.079]		130/127	0.887	36	1.055	*	131/127	1.149	36	[1.141]		129/128	0.825	36	[1.046]		130/128	0.887
738	gi|15341202	filamin [Gallus gallus]	1098	303590	44	39	22	20	9.9	5.94	0.29	Quantitation summary for protein	129/126	1.063	23	1.064	*	130/126	1.373	23	[1.062]		131/126	0.933	23	1.084	*	129/127	1.103	23	1.083	*	130/127	1.435	23	1.075	*	131/127	0.978	23	1.081		129/128	0.895	22	1.037	*	130/128	1.192
739	gi|118092544	PREDICTED: bifunctional 3~-phosphoadenosine 5~-phosphosulfate synthase 2 [Gallus gallus]	1098	77656	50	43	14	13	26.1	7.92	1.11	Quantitation summary for protein	129/126	0.867	47	1.026	*	130/126	0.925	47	[1.045]		131/126	0.805	47	1.077	*	129/127	0.721	47	1.029	*	130/127	0.775	47	1.043	*	131/127	0.676	47	1.076	*	129/128	0.743	47	1.034	*	130/128	0.788
740	gi|163929821	chicken D-serine dehydratase [Gallus gallus]	1096	42375	43	42	7	7	27.4	7.66	1.28	Quantitation summary for protein	129/126	1.337	42	1.055	*	130/126	1.407	42	1.054	*	131/126	1.233	42	1.079	*	129/127	1.044	43	1.074	*	130/127	1.107	43	1.046	*	131/127	0.974	43	1.065	*	129/128	1.403	40	1.061	*	130/128	1.465
741	gi|363728462	PREDICTED: omega-amidase NIT2 isoform 2 [Gallus gallus]	1096	36476	45	40	12	11	45	8.07	3.01	Quantitation summary for protein	129/126	0.919	42	[1.053]		130/126	0.997	42	[1.070]		131/126	1.392	42	[1.160]		129/127	0.87	42	1.034	*	130/127	0.951	42	[1.044]		131/127	1.33	42	[1.124]		129/128	0.929	42	1.022	*	130/128	1.001
742	gi|515838	single stranded D box binding factor [Gallus gallus]	1096	38831	39	34	10	7	34.8	8.62	2.41	Quantitation summary for protein	129/126	0.95	37	[1.073]		130/126	0.823	37	[1.077]		131/126	0.565	37	1.116	*	129/127	1.071	37	[1.097]		130/127	0.934	37	1.053	*	131/127	0.643	37	1.105	*	129/128	0.969	37	[1.032]		130/128	0.835
743	gi|53130752	hypothetical protein RCJMB04_9n21 [Gallus gallus]	1095	45435	80	60	19	16	45.7	6.48	4.78	Quantitation summary for protein	129/126	0.954	65	1.035	*	130/126	0.918	65	1.034	*	131/126	1.095	65	1.069	*	129/127	0.942	65	1.034	*	130/127	0.913	65	1.032	*	131/127	1.092	65	1.064	*	129/128	0.965	65	[1.026]		130/128	0.923
744	gi|53136506	hypothetical protein RCJMB04_30a22 [Gallus gallus]	1095	88556	46	38	17	16	30	6.65	1.14	Quantitation summary for protein	129/126	1.084	39	1.031	*	130/126	0.948	39	1.047	*	131/126	0.8	39	[1.095]		129/127	1.117	39	1.059	*	130/127	0.983	39	1.04	*	131/127	0.832	39	[1.078]		129/128	1.001	39	1.029		130/128	0.869
745	gi|50728788	PREDICTED: 3-mercaptopyruvate sulfurtransferase isoform 2 [Gallus gallus]	1093	38298	59	47	15	13	57.9	5.8	3.83	Quantitation summary for protein	129/126	0.878	50	1.037	*	130/126	1.045	50	[1.092]		131/126	1.052	50	[1.149]		129/127	0.703	50	[1.109]		130/127	0.843	50	1.051	*	131/127	0.85	50	[1.068]		129/128	0.815	50	[1.077]		130/128	0.964
746	gi|363733977	PREDICTED: acyl-coenzyme A amino acid N-acyltransferase 2 [Gallus gallus]	1092	48090	52	46	13	11	35	6.16	2.3	Quantitation summary for protein	129/126	1.107	51	1.055	*	130/126	1.04	51	[1.053]		131/126	0.952	51	[1.064]		129/127	1.104	51	1.063	*	130/127	1.045	51	1.056	*	131/127	0.959	51	1.068	*	129/128	1.09	51	[1.045]		130/128	1.069
747	gi|118089434	PREDICTED: WD repeat-containing protein 44 isoform 1 [Gallus gallus]	1091	118721	40	36	10	10	17	5.39	0.35	Quantitation summary for protein	129/126	0.95	39	[1.049]		130/126	0.851	39	[1.052]		131/126	1.006	39	[1.074]		129/127	0.962	39	[1.049]		130/127	0.867	39	[1.037]		131/127	1.028	39	[1.062]		129/128	1.049	39	1.031	*	130/128	0.933
748	gi|117807	RecName: Full=Cytochrome b5	1091	16681	59	40	7	6	55.1	5.07	4.29	Quantitation summary for protein	129/126	0.776	26	1.068	*	130/126	0.881	26	1.093	*	131/126	1.441	26	[1.130]		129/127	0.723	26	1.093	*	130/127	0.826	26	1.069	*	131/127	1.355	26	[1.103]		129/128	0.738	26	1.058	*	130/128	0.833
749	gi|363743473	PREDICTED: 60S ribosomal protein L23 isoform 2 [Gallus gallus]	1090	18637	34	30	7	6	51.4	10.51	5.22	Quantitation summary for protein	129/126	1.162	33	1.039	*	130/126	1.096	33	[1.045]		131/126	1.26	33	[1.094]		129/127	1.026	33	1.036	*	130/127	0.974	33	1.039	*	131/127	1.123	33	1.084	*	129/128	1.171	33	1.042	*	130/128	1.082
750	gi|485265	proteasome 28 kDa subunit homolog, similar to Swiss-Prot Accession Number P22769 [Gallus gallus]	1088	33955	42	39	11	10	40.6	8.93	2.69	Quantitation summary for protein	129/126	0.982	41	1.08		130/126	0.938	41	1.093	*	131/126	1.142	41	[1.129]		129/127	0.979	41	[1.138]		130/127	0.941	41	[1.065]		131/127	1.149	41	1.072	*	129/128	1.133	41	1.076	*	130/128	1.074
751	gi|53130724	hypothetical protein RCJMB04_9l5 [Gallus gallus]	1088	28315	45	34	10	8	65.5	6.43	3.75	Quantitation summary for protein	129/126	0.984	39	1.04	*	130/126	0.769	37	1.042	*	131/126	1.081	39	1.062	*	129/127	0.982	39	1.052	*	130/127	0.778	38	1.039	*	131/127	1.089	39	1.054	*	129/128	0.924	39	[1.046]		130/128	0.723
752	gi|212634	insulinoma protein (rig) [Gallus gallus]	1087	20925	48	39	5	4	26.9	10.39	6.99	Quantitation summary for protein	129/126	1.066	43	1.078	*	130/126	1.049	43	1.069	*	131/126	1.298	43	1.074	*	129/127	0.905	43	1.103	*	130/127	0.896	43	1.069	*	131/127	1.111	43	1.084	*	129/128	1.166	43	1.073	*	130/128	1.14
753	gi|60098399	hypothetical protein RCJMB04_1j11 [Gallus gallus]	1086	64631	42	33	11	9	21.2	6.57	0.91	Quantitation summary for protein	129/126	1.071	36	1.038	*	130/126	1.037	36	[1.040]		131/126	1.164	36	[1.084]		129/127	0.967	36	1.044	*	130/127	0.942	36	1.031	*	131/127	1.061	36	1.076	*	129/128	0.943	36	1.025	*	130/128	0.907
754	gi|363737541	PREDICTED: mannose-6-phosphate isomerase [Gallus gallus]	1084	49878	30	25	4	3	9.4	5.54	0.38	Quantitation summary for protein	129/126	1.119	28	1.024	*	130/126	1.049	28	1.028	*	131/126	0.926	28	1.03	*	129/127	1.09	28	1.022	*	130/127	1.029	28	1.029	*	131/127	0.91	28	1.027	*	129/128	1.012	28	1.02	*	130/128	0.943
755	gi|50753202	PREDICTED: uncharacterized protein LOC415531 isoform 2 [Gallus gallus]	1083	36251	32	31	7	7	26.6	5.22	1.2	Quantitation summary for protein	129/126	1.122	32	1.035	*	130/126	0.985	32	[1.131]		131/126	0.765	32	[1.214]		129/127	1.37	32	1.085	*	130/127	1.211	32	1.075	*	131/127	0.943	32	[1.149]		129/128	1.155	32	1.026	*	130/128	1.007
756	gi|363738961	PREDICTED: LOW QUALITY PROTEIN: vesicular integral-membrane protein VIP36-like [Gallus gallus]	1081	41521	56	46	10	10	33.8	6	2.41	Quantitation summary for protein	129/126	1.116	49	[1.103]		130/126	1.01	49	[1.098]		131/126	0.74	49	[1.138]		129/127	1.324	49	[1.122]		130/127	1.207	49	[1.074]		131/127	0.885	49	[1.099]		129/128	1.09	49	[1.060]		130/128	0.98
757	gi|263505112	RecName: Full=Peroxiredoxin-1	1081	27570	88	56	16	12	61.8	8.24	16.42	Quantitation summary for protein	129/126	0.91	71	[1.229]		130/126	0.993	71	1.195		131/126	1.215	71	[1.315]		129/127	0.767	71	[1.370]		130/127	0.843	71	1.1	*	131/127	1.034	71	[1.241]		129/128	1.011	71	[1.075]		130/128	1.096
758	gi|118092337	PREDICTED: l-2-hydroxyglutarate dehydrogenase, mitochondrial [Gallus gallus]	1080	54477	38	37	9	8	30.5	8.19	1.02	Quantitation summary for protein	129/126	0.911	38	[1.074]		130/126	1.1	38	1.028	*	131/126	1.297	38	1.043	*	129/127	0.827	38	[1.092]		130/127	1.006	38	1.044		131/127	1.188	38	[1.056]		129/128	0.895	38	[1.056]		130/128	1.091
759	gi|60098673	hypothetical protein RCJMB04_5e8 [Gallus gallus]	1080	43969	41	38	11	9	35	8.48	1.39	Quantitation summary for protein	129/126	0.954	39	1.031	*	130/126	0.881	39	[1.037]		131/126	1.027	39	[1.069]		129/127	1.035	39	[1.041]		130/127	0.963	39	1.039	*	131/127	1.124	39	[1.069]		129/128	1.092	39	1.032	*	130/128	1.002
760	gi|53130998	hypothetical protein RCJMB04_11a23 [Gallus gallus]	1078	24898	50	46	10	10	61.9	5.75	9.98	Quantitation summary for protein	129/126	0.96	33	1.143		130/126	1.08	33	[1.185]		131/126	0.546	32	1.187	*	129/127	1.078	33	1.238		130/127	1.222	33	1.118	*	131/127	0.616	32	1.153	*	129/128	1.031	33	1.068	*	130/128	1.153
761	gi|118098348	PREDICTED: thiomorpholine-carboxylate dehydrogenase [Gallus gallus]	1077	35823	36	34	10	10	34.7	5.75	2.16	Quantitation summary for protein	129/126	1.037	36	1.027	*	130/126	1.057	36	[1.040]		131/126	1.195	36	[1.045]		129/127	0.828	36	1.043	*	130/127	0.85	36	1.05	*	131/127	0.964	36	[1.062]		129/128	0.876	36	1.028	*	130/128	0.887
762	gi|24080794	phospholipid hydroperoxide glutathione peroxidase [Gallus gallus]	1076	22992	50	45	11	10	57.1	7.68	6.7	Quantitation summary for protein	129/126	0.344	47	[1.168]		130/126	0.305	47	[1.161]		131/126	0.336	47	[1.169]		129/127	0.271	47	1.179	*	130/127	0.242	47	[1.168]		131/127	0.268	47	[1.177]		129/128	0.437	47	[1.143]		130/128	0.386
763	gi|53129746	hypothetical protein RCJMB04_6b22 [Gallus gallus]	1076	33274	48	38	11	8	35.3	4.93	2.78	Quantitation summary for protein	129/126	1.179	41	1.042	*	130/126	0.847	42	1.067	*	131/126	1.085	42	[1.126]		129/127	1.243	42	[1.079]		130/127	0.894	42	1.034	*	131/127	1.148	42	[1.090]		129/128	1.113	42	[1.027]		130/128	0.789
764	gi|50752104	PREDICTED: septin-2 [Gallus gallus]	1075	48085	39	36	9	8	29.6	5.91	1.37	Quantitation summary for protein	129/126	0.869	14	1.06	*	130/126	0.971	13	1.023	*	131/126	0.868	13	1.022	*	129/127	0.93	14	1.063	*	130/127	1.028	14	[1.036]		131/127	0.961	14	1.037	*	129/128	0.8	14	1.049	*	130/128	0.874
765	gi|23821302	hexokinase2 [Gallus gallus]	1074	117640	54	45	13	11	15.2	5.74	0.47	Quantitation summary for protein	129/126	0.94	42	1.021	*	130/126	0.838	43	[1.020]		131/126	0.884	43	[1.047]		129/127	1.212	43	1.038	*	130/127	1.091	43	[1.027]		131/127	1.153	43	1.048	*	129/128	0.877	43	1.021	*	130/128	0.779
766	gi|363739404	PREDICTED: Na(+)/H(+) exchange regulatory cofactor NHE-RF2 [Gallus gallus]	1070	45948	39	37	8	8	35.9	7.74	1.64	Quantitation summary for protein	129/126	1.047	39	[1.051]		130/126	1.047	39	1.06	*	131/126	1.09	39	[1.127]		129/127	1.141	39	1.068	*	130/127	1.149	39	1.04	*	131/127	1.199	39	[1.098]		129/128	0.988	39	1.023	*	130/128	0.981
767	gi|136089	RecName: Full=Tropomyosin beta chain; AltName: Full=Beta-tropomyosin; AltName: Full=Tropomyosin-2	1067	42037	73	48	23	16	47.5	4.69	4.69	Quantitation summary for protein	129/126	---	0	---		130/126	---	0	---		131/126	---	0	---		129/127	---	0	---		130/127	---	0	---		131/127	---	0	---		129/128	---	0	---		130/128	---
768	gi|15425876	putative agmatinase [Gallus gallus]	1067	38982	50	43	8	6	27.1	5.98	2.13	Quantitation summary for protein	129/126	0.993	41	1.095		130/126	1.024	41	1.106		131/126	1.087	41	1.139	*	129/127	0.733	42	1.136	*	130/127	0.761	42	[1.113]		131/127	0.809	42	[1.135]		129/128	0.919	42	[1.093]		130/128	0.941
769	gi|53130274	hypothetical protein RCJMB04_6l6 [Gallus gallus]	1067	34796	46	37	15	9	50	5.04	2.58	Quantitation summary for protein	129/126	1.276	37	1.121	*	130/126	0.966	37	1.11		131/126	1.051	37	[1.163]		129/127	1.321	37	1.16	*	130/127	1.007	37	1.078		131/127	1.098	37	1.134	*	129/128	1.209	37	[1.063]		130/128	0.91
770	gi|118085838	PREDICTED: probable acyl coa dehydrogenase 6-like [Gallus gallus]	1065	50559	33	32	10	10	29	8.37	1.14	Quantitation summary for protein	129/126	0.823	32	1.07	*	130/126	0.92	32	1.081	*	131/126	1.47	32	[1.203]		129/127	0.778	32	1.088	*	130/127	0.875	32	[1.091]		131/127	1.401	32	[1.211]		129/128	0.757	32	1.052	*	130/128	0.841
771	gi|53136628	hypothetical protein RCJMB04_31o2 [Gallus gallus]	1064	48208	64	42	13	12	41.8	9.4	2.52	Quantitation summary for protein	129/126	0.742	45	1.078	*	130/126	1.081	45	[1.123]		131/126	1.049	45	1.176		129/127	0.711	45	[1.105]		130/127	1.042	45	[1.080]		131/127	1.014	45	1.123		129/128	0.74	45	1.05	*	130/128	1.071
772	gi|124110120	growth factor receptor-bound protein 2 [Gallus gallus]	1062	29171	32	29	9	9	41	5.78	1.64	Quantitation summary for protein	129/126	0.986	31	1.035	*	130/126	0.954	31	[1.033]		131/126	1.243	31	1.067	*	129/127	0.96	31	1.045	*	130/127	0.935	31	1.028	*	131/127	1.221	31	1.05	*	129/128	1.048	31	[1.026]		130/128	1.03
773	gi|60099089	hypothetical protein RCJMB04_24b10 [Gallus gallus]	1061	99399	40	34	14	11	18.5	7.23	0.57	Quantitation summary for protein	129/126	1.115	37	[1.031]		130/126	0.892	37	[1.044]		131/126	0.794	37	[1.083]		129/127	1.405	37	[1.044]		130/127	1.132	37	1.034	*	131/127	1.01	37	1.063		129/128	1.098	37	1.021	*	130/128	0.873
774	gi|363735203	PREDICTED: microsomal triglyceride transfer protein large subunit-like [Gallus gallus]	1059	56327	25	22	5	4	15.8	5.91	0.41	Quantitation summary for protein	129/126	1.293	23	1.051	*	130/126	1.125	23	1.056	*	131/126	0.986	23	1.063		129/127	1.393	23	[1.070]		130/127	1.219	23	[1.053]		131/127	1.072	23	1.065	*	129/128	1.176	23	1.042	*	130/128	1.016
775	gi|53136602	hypothetical protein RCJMB04_31h14 [Gallus gallus]	1059	68518	54	47	19	17	38.8	5.72	1.94	Quantitation summary for protein	129/126	1.565	52	1.064	*	130/126	1.016	52	[1.087]		131/126	1.282	52	[1.147]		129/127	1.698	52	[1.114]		130/127	1.11	52	1.043	*	131/127	1.404	52	[1.095]		129/128	1.462	52	[1.047]		130/128	0.943
776	gi|53127364	hypothetical protein RCJMB04_2a5 [Gallus gallus]	1058	48881	32	29	8	8	28.7	7.12	1.66	Quantitation summary for protein	129/126	1.292	28	1.086	*	130/126	1.313	28	[1.111]		131/126	1.301	28	[1.201]		129/127	1.111	28	[1.106]		130/127	1.137	28	1.084	*	131/127	1.129	28	[1.184]		129/128	1.172	28	1.058	*	130/128	1.184
777	gi|60098981	hypothetical protein RCJMB04_17m6 [Gallus gallus]	1058	21642	17	17	1	1	12.7	5.09	0.54	Quantitation summary for protein	129/126	1.083	17	1.042	*	130/126	1.16	17	1.037	*	131/126	1.029	17	1.081		129/127	1.167	16	1.055	*	130/127	1.294	17	1.064	*	131/127	1.15	17	1.065	*	129/128	1.167	17	1.032	*	130/128	1.242
778	gi|115417	RecName: Full=Cadherin-1; AltName: Full=Epithelial cadherin; Short=E-cadherin; AltName: Full=Liver cell adhesion molecule; Short=L-CAM; Flags: Precursor	1057	107402	44	42	11	10	12.1	5.04	0.57	Quantitation summary for protein	129/126	1.08	43	1.038	*	130/126	1.114	43	1.061	*	131/126	0.929	43	[1.098]		129/127	1.01	43	1.049		130/127	1.049	43	1.042	*	131/127	0.877	43	[1.086]		129/128	0.993	43	1.023	*	130/128	1.017
779	gi|363744316	PREDICTED: histidine triad nucleotide-binding protein 2, mitochondrial-like [Gallus gallus]	1057	17993	36	34	5	5	43.7	9.56	2.96	Quantitation summary for protein	129/126	1.022	34	1.053	*	130/126	1.248	33	1.055	*	131/126	1.518	34	1.073	*	129/127	0.767	34	1.08	*	130/127	0.943	34	[1.069]		131/127	1.15	34	1.057	*	129/128	0.956	34	1.051	*	130/128	1.158
780	gi|53128405	hypothetical protein RCJMB04_4n15 [Gallus gallus]	1056	111905	71	58	27	22	30.1	5.14	1.24	Quantitation summary for protein	129/126	1.267	46	1.044	*	130/126	0.99	45	[1.056]		131/126	0.759	45	[1.134]		129/127	1.371	46	[1.054]		130/127	1.078	45	[1.049]		131/127	0.829	45	[1.127]		129/128	1.209	46	[1.034]		130/128	0.938
781	gi|118097222	PREDICTED: eukaryotic peptide chain release factor subunit 1 [Gallus gallus]	1055	57936	37	31	9	8	21.7	5.51	0.64	Quantitation summary for protein	129/126	1.007	37	[1.031]		130/126	0.964	37	[1.035]		131/126	0.811	37	[1.089]		129/127	0.922	37	[1.035]		130/127	0.889	37	[1.029]		131/127	0.749	37	[1.084]		129/128	1.072	37	1.019	*	130/128	1.02
782	gi|363737066	PREDICTED: insulin-like growth factor 2 mRNA-binding protein 2-like [Gallus gallus]	1054	71159	49	40	14	12	25.4	8.64	1.15	Quantitation summary for protein	129/126	1.038	32	1.039	*	130/126	0.993	32	1.041		131/126	1.107	32	1.054	*	129/127	1.05	32	1.048	*	130/127	1.012	32	1.045		131/127	1.13	32	1.051	*	129/128	1.086	31	1.044	*	130/128	1.047
783	gi|357593606	methylglutaconyl-CoA hydratase, mitochondrial isoform 1 [Gallus gallus]	1053	39476	72	49	14	11	37.7	9.26	3.61	Quantitation summary for protein	129/126	1.152	57	1.077	*	130/126	1.202	57	[1.106]		131/126	1.677	57	[1.223]		129/127	0.88	57	1.103	*	130/127	0.924	57	1.103	*	131/127	1.292	57	[1.240]		129/128	1.139	56	1.058	*	130/128	1.133
784	gi|118090738	PREDICTED: epididymis-specific alpha-mannosidase [Gallus gallus]	1052	130430	30	28	10	9	11	8.46	0.28	Quantitation summary for protein	129/126	0.83	28	1.046	*	130/126	1.008	28	1.042		131/126	1.176	28	[1.075]		129/127	0.727	28	1.052	*	130/127	0.888	28	1.046	*	131/127	0.938	27	1.064	*	129/128	1.088	28	1.026	*	130/128	1.347
785	gi|114391	RecName: Full=Sodium/potassium-transporting ATPase subunit beta-1; AltName: Full=Sodium/potassium-dependent ATPase subunit beta-1	1052	41963	35	30	6	4	18.7	7.44	0.7	Quantitation summary for protein	129/126	1.046	31	1.022	*	130/126	1.027	31	1.02	*	131/126	0.822	31	1.03	*	129/127	1.244	31	[1.019]		130/127	1.231	31	[1.028]		131/127	0.986	31	[1.026]		129/128	0.934	31	[1.021]		130/128	0.912
786	gi|1531769	rab5C-like protein [Gallus gallus]	1051	26975	36	31	9	8	57.9	8.64	4.75	Quantitation summary for protein	129/126	1.25	15	1.072	*	130/126	0.864	15	1.045	*	131/126	0.501	15	1.153	*	129/127	1.699	15	1.121	*	130/127	1.182	15	1.063	*	131/127	0.687	15	1.108	*	129/128	1.153	15	1.044	*	130/128	0.792
787	gi|50757498	PREDICTED: 60S ribosomal protein L12 [Gallus gallus]	1051	21564	49	36	12	9	64.8	9.48	12.55	Quantitation summary for protein	129/126	1.199	43	[1.070]		130/126	1.006	43	1.05		131/126	0.961	43	[1.147]		129/127	1.078	43	[1.106]		130/127	0.911	43	[1.072]		131/127	0.872	43	[1.178]		129/128	1.211	42	1.039	*	130/128	0.992
788	gi|363734612	PREDICTED: plasma protease C1 inhibitor-like [Gallus gallus]	1050	57999	39	36	10	9	22.3	5.73	0.94	Quantitation summary for protein	129/126	0.855	36	[1.096]		130/126	0.909	36	[1.067]		131/126	1.219	36	[1.218]		129/127	0.797	36	[1.124]		130/127	0.853	36	[1.178]		131/127	1.147	36	[1.109]		129/128	0.917	36	1.025	*	130/128	0.968
789	gi|50734079	PREDICTED: enoyl-CoA delta isomerase 2, mitochondrial isoform 2 [Gallus gallus]	1050	53854	56	51	14	14	42.6	9.03	2.28	Quantitation summary for protein	129/126	0.826	52	[1.110]		130/126	0.88	52	[1.141]		131/126	1.143	52	[1.163]		129/127	0.816	52	[1.081]		130/127	0.876	52	[1.140]		131/127	1.141	52	1.114	*	129/128	0.557	52	[1.103]		130/128	0.589
790	gi|29423634	histidine ammonia lyase [Gallus gallus]	1050	81564	52	38	17	13	28.5	6.17	1.2	Quantitation summary for protein	129/126	1.615	44	[1.058]		130/126	1.251	44	[1.037]		131/126	1.834	44	[1.060]		129/127	1.309	44	[1.045]		130/127	1.021	44	[1.035]		131/127	1.501	44	[1.049]		129/128	1.196	44	1.024	*	130/128	0.921
791	gi|53130690	hypothetical protein RCJMB04_9i5 [Gallus gallus]	1046	23380	52	45	10	10	45	5.53	8.69	Quantitation summary for protein	129/126	1.125	23	[1.108]		130/126	0.835	23	[1.130]		131/126	0.317	23	1.254	*	129/127	1.57	23	[1.170]		130/127	1.174	23	[1.071]		131/127	0.426	22	1.169	*	129/128	1.297	23	1.056	*	130/128	0.957
792	gi|53136185	hypothetical protein RCJMB04_27f14 [Gallus gallus]	1044	51126	50	44	13	11	22.9	5.89	1.71	Quantitation summary for protein	129/126	0.891	45	[1.040]		130/126	0.902	45	[1.050]		131/126	0.9	45	[1.083]		129/127	0.903	45	[1.059]		130/127	0.92	45	1.036	*	131/127	0.92	45	[1.067]		129/128	1.024	46	[1.022]		130/128	1.03
793	gi|383387799	methionine--tRNA ligase, cytoplasmic [Gallus gallus]	1044	107329	38	30	12	10	16.2	6.34	0.43	Quantitation summary for protein	129/126	1.254	32	1.046	*	130/126	1.078	32	[1.040]		131/126	0.924	32	1.085	*	129/127	1.319	32	[1.060]		130/127	1.141	32	[1.045]		131/127	0.98	32	1.069		129/128	1.211	32	1.039	*	130/128	1.034
794	gi|363742061	PREDICTED: eukaryotic translation initiation factor 4 gamma 3 [Gallus gallus]	1042	202738	68	55	27	24	19.9	5.13	0.59	Quantitation summary for protein	129/126	1.03	43	[1.031]		130/126	0.964	43	1.033	*	131/126	0.834	43	[1.066]		129/127	1.087	43	[1.033]		130/127	1.024	43	1.025	*	131/127	0.888	43	[1.055]		129/128	1.077	43	[1.016]		130/128	1.002
795	gi|363744151	PREDICTED: NADH dehydrogenase [ubiquinone] iron-sulfur protein 4, mitochondrial [Gallus gallus]	1038	22608	42	36	10	9	52.6	9.88	5.9	Quantitation summary for protein	129/126	0.723	37	[1.084]		130/126	0.734	37	[1.163]		131/126	0.566	37	[1.265]		129/127	0.648	37	1.076	*	130/127	0.662	37	[1.088]		131/127	0.512	37	[1.190]		129/128	0.786	37	[1.063]		130/128	0.793
796	gi|50729668	PREDICTED: protein TFG [Gallus gallus]	1037	45654	47	38	12	10	37.7	4.96	1.66	Quantitation summary for protein	129/126	1.068	40	[1.075]		130/126	0.988	40	[1.110]		131/126	0.994	40	[1.153]		129/127	1.006	39	1.087		130/127	0.932	40	[1.092]		131/127	0.94	40	[1.123]		129/128	1.133	40	[1.052]		130/128	1.041
797	gi|51989481	FK-506 binding protein 51 [Gallus gallus]	1033	62710	66	58	15	12	32.5	5.94	1.15	Quantitation summary for protein	129/126	1.564	62	[1.040]		130/126	1.053	62	[1.028]		131/126	1.174	62	[1.055]		129/127	1.614	62	[1.052]		130/127	1.094	62	1.022	*	131/127	1.222	62	[1.047]		129/128	1.567	62	1.025	*	130/128	1.048
798	gi|363728072	PREDICTED: LOW QUALITY PROTEIN: tetratricopeptide repeat protein 38 [Gallus gallus]	1033	58569	44	35	13	12	33.7	5.66	1.98	Quantitation summary for protein	129/126	1.014	10	[1.128]		130/126	1.111	10	1.131	*	131/126	0.773	10	[1.128]		129/127	1.128	10	1.08	*	130/127	1.246	10	1.124	*	131/127	0.868	10	1.082	*	129/128	1.334	10	[1.144]		130/128	1.453
799	gi|60098921	hypothetical protein RCJMB04_15g18 [Gallus gallus]	1030	54957	57	48	15	14	31.2	4.82	1.54	Quantitation summary for protein	129/126	1.066	5	1.103		130/126	0.872	5	1.112	*	131/126	0.488	5	1.184	*	129/127	1.24	5	1.135	*	130/127	1.022	5	1.132		131/127	0.573	5	1.221	*	129/128	1.165	5	1.104	*	130/128	0.958
800	gi|53136784	hypothetical protein RCJMB04_33n14 [Gallus gallus]	1025	56939	53	36	18	14	46.4	8.63	2.44	Quantitation summary for protein	129/126	0.905	42	[1.057]		130/126	1.136	42	[1.148]		131/126	1.17	42	[1.185]		129/127	0.744	42	1.103	*	130/127	0.941	42	1.086	*	131/127	0.971	42	[1.130]		129/128	0.798	42	1.047	*	130/128	0.996
801	gi|53132662	hypothetical protein RCJMB04_13l16 [Gallus gallus]	1024	37541	44	39	12	10	48.4	8.43	3.58	Quantitation summary for protein	129/126	1.057	41	1.056	*	130/126	1.04	41	[1.106]		131/126	0.837	42	[1.211]		129/127	1.15	41	[1.108]		130/127	1.134	41	[1.110]		131/127	0.915	41	[1.209]		129/128	0.941	42	[1.069]		130/128	0.916
802	gi|121077	RecName: Full=Glycine cleavage system H protein, mitochondrial; Flags: Precursor	1023	20691	39	31	2	2	18.3	4.91	2.34	Quantitation summary for protein	129/126	0.62	36	[1.092]		130/126	1.034	36	1.06	*	131/126	1.499	36	[1.067]		129/127	0.503	36	[1.130]		130/127	0.845	36	[1.101]		131/127	1.227	36	1.077	*	129/128	0.757	36	[1.083]		130/128	1.255
803	gi|50760928	PREDICTED: NADH dehydrogenase [ubiquinone] 1 alpha subcomplex subunit 7 [Gallus gallus]	1022	14883	39	35	8	6	62.6	10.33	6.84	Quantitation summary for protein	129/126	0.783	37	[1.066]		130/126	0.873	37	[1.098]		131/126	0.69	37	[1.170]		129/127	0.78	37	[1.086]		130/127	0.875	37	[1.045]		131/127	0.693	37	[1.116]		129/128	0.773	37	[1.046]		130/128	0.856
804	gi|13992475	putative FK506-binding protein [Gallus gallus]	1022	33323	41	33	11	10	48	9.2	4.03	Quantitation summary for protein	129/126	0.93	36	1.052	*	130/126	1.129	36	[1.085]		131/126	1.626	36	[1.225]		129/127	0.805	36	[1.068]		130/127	0.984	36	[1.069]		131/127	1.421	36	[1.204]		129/128	0.953	36	[1.051]		130/128	1.15
805	gi|62983	ribosomal protein L5 [Gallus gallus]	1022	42777	87	59	18	16	49.2	9.73	4.97	Quantitation summary for protein	129/126	1.043	66	1.061	*	130/126	1.257	66	[1.124]		131/126	1.579	66	[1.190]		129/127	0.94	66	[1.106]		130/127	1.141	66	[1.065]		131/127	1.436	66	[1.124]		129/128	1.115	66	1.038	*	130/128	1.335
806	gi|53136031	hypothetical protein RCJMB04_26i1 [Gallus gallus]	1022	36066	40	35	10	7	32.6	8.93	1.41	Quantitation summary for protein	129/126	0.903	37	1.033	*	130/126	1.026	37	[1.050]		131/126	1.274	37	1.06	*	129/127	0.894	37	1.043	*	130/127	1.023	37	[1.044]		131/127	1.274	37	1.046	*	129/128	0.705	37	1.048	*	130/128	0.797
807	gi|118101365	PREDICTED: proline synthase co-transcribed bacterial homolog protein [Gallus gallus]	1022	35265	50	43	14	13	52.5	8.35	4.51	Quantitation summary for protein	129/126	0.871	48	[1.062]		130/126	0.882	48	1.043	*	131/126	1.056	48	1.045	*	129/127	0.771	48	[1.105]		130/127	0.786	48	[1.080]		131/127	0.944	48	1.058	*	129/128	0.908	48	[1.067]		130/128	0.912
808	gi|50729038	PREDICTED: aldo-keto reductase family 1 member B10 [Gallus gallus]	1022	42618	78	62	16	14	51.9	7.08	4.17	Quantitation summary for protein	129/126	0.955	25	1.055	*	130/126	0.865	24	[1.088]		131/126	0.907	25	1.111	*	129/127	0.969	25	1.087		130/127	0.883	24	1.053	*	131/127	0.929	25	1.076	*	129/128	0.859	25	1.041	*	130/128	0.773
809	gi|60099049	hypothetical protein RCJMB04_21c16 [Gallus gallus]	1021	14850	36	29	13	12	86	5.07	25.96	Quantitation summary for protein	129/126	1.081	33	[1.146]		130/126	0.796	33	[1.137]		131/126	0.922	33	[1.272]		129/127	1.213	33	[1.200]		130/127	0.899	33	1.084	*	131/127	1.045	33	1.205		129/128	1.061	33	1.049	*	130/128	0.776
810	gi|53136880	hypothetical protein RCJMB04_35g11 [Gallus gallus]	1020	61605	41	41	7	7	17.1	6.33	0.87	Quantitation summary for protein	129/126	1.725	41	[1.174]		130/126	1.076	41	[1.091]		131/126	1.595	41	[1.137]		129/127	1.572	41	[1.173]		130/127	0.987	41	[1.076]		131/127	1.467	41	[1.117]		129/128	1.766	41	[1.164]		130/128	1.094
811	gi|363744228	PREDICTED: AP-3 complex subunit beta-1 [Gallus gallus]	1019	143575	59	51	15	14	14.3	5.94	0.5	Quantitation summary for protein	129/126	1.048	54	1.019	*	130/126	0.921	54	[1.040]		131/126	0.825	54	[1.081]		129/127	1.201	54	[1.036]		130/127	1.063	54	1.028	*	131/127	0.954	54	[1.063]		129/128	1.103	54	1.016	*	130/128	0.963
812	gi|363741621	PREDICTED: exportin-2 [Gallus gallus]	1018	124628	42	33	15	13	14.2	5.41	0.51	Quantitation summary for protein	129/126	1.1	35	[1.040]		130/126	0.974	35	[1.056]		131/126	0.69	35	[1.086]		129/127	1.37	35	[1.064]		130/127	1.22	35	[1.040]		131/127	0.866	35	[1.058]		129/128	1.038	35	1.025	*	130/128	0.912
813	gi|118083981	PREDICTED: amine oxidase [flavin-containing] B [Gallus gallus]	1015	68274	48	43	11	10	26.5	8.59	0.84	Quantitation summary for protein	129/126	1.002	46	[1.040]		130/126	1.1	46	1.032	*	131/126	0.879	46	1.061	*	129/127	0.815	46	1.031	*	130/127	0.9	46	1.037	*	131/127	0.721	46	[1.069]		129/128	0.696	46	1.037	*	130/128	0.76
814	gi|118090079	PREDICTED: inorganic pyrophosphatase 2, mitochondrial [Gallus gallus]	1014	59055	51	32	9	7	21.8	8.91	1.65	Quantitation summary for protein	129/126	0.816	30	1.048	*	130/126	0.929	30	[1.184]		131/126	1.018	30	[1.310]		129/127	0.746	30	[1.105]		130/127	0.854	30	1.089	*	131/127	0.938	30	[1.202]		129/128	0.817	30	1.037	*	130/128	0.924
815	gi|314122256	sec1 family domain-containing protein 1 [Gallus gallus]	1013	82206	37	33	14	10	26.6	5.74	0.8	Quantitation summary for protein	129/126	1.392	35	1.052	*	130/126	1.116	35	1.053	*	131/126	0.997	35	[1.099]		129/127	1.365	35	1.064	*	130/127	1.102	35	1.044	*	131/127	1.014	34	1.078		129/128	1.348	35	1.05	*	130/128	1.074
816	gi|60098659	hypothetical protein RCJMB04_4m11 [Gallus gallus]	1010	124128	48	40	13	12	18	4.85	0.48	Quantitation summary for protein	129/126	1.017	39	1.036	*	130/126	1.198	39	[1.040]		131/126	1.27	39	1.057	*	129/127	1.141	39	[1.050]		130/127	1.354	39	1.043	*	131/127	1.437	39	[1.055]		129/128	1.052	39	[1.056]		130/128	1.232
817	gi|5733818	gephyrin [Gallus gallus]	1003	88376	41	37	17	15	26	5.45	0.93	Quantitation summary for protein	129/126	1.126	39	[1.070]		130/126	0.918	39	[1.089]		131/126	0.942	39	[1.187]		129/127	1.127	39	[1.110]		130/127	0.925	39	1.056	*	131/127	0.951	39	[1.154]		129/128	1.052	39	1.041	*	130/128	0.852
818	gi|6224674	prosaposin [Gallus gallus]	1003	69458	60	50	10	7	17.8	5.03	0.91	Quantitation summary for protein	129/126	0.861	52	1.059	*	130/126	0.655	52	[1.117]		131/126	0.735	51	[1.203]		129/127	1.071	52	1.094	*	130/127	0.82	52	1.071	*	131/127	0.917	51	[1.146]		129/128	0.809	52	[1.046]		130/128	0.612
819	gi|3851612	succinate dehydrogenase Ip subunit [Gallus gallus]	1003	39561	49	39	13	9	38.3	9.13	2.62	Quantitation summary for protein	129/126	0.88	45	1.068	*	130/126	1.153	45	1.053	*	131/126	1.017	45	[1.082]		129/127	0.87	45	1.073	*	130/127	1.149	44	1.044	*	131/127	1.015	45	[1.070]		129/128	0.934	45	[1.050]		130/128	1.217
820	gi|53133460	hypothetical protein RCJMB04_16o18 [Gallus gallus]	1001	96984	43	38	11	11	13.8	4.94	0.44	Quantitation summary for protein	129/126	0.988	39	1.028	*	130/126	0.942	39	[1.048]		131/126	0.915	39	1.039	*	129/127	1.029	40	1.04	*	130/127	0.988	40	1.035	*	131/127	0.962	40	1.043	*	129/128	1.066	40	1.023	*	130/128	1.011
821	gi|211813	SM22 [Gallus gallus]	1000	26711	35	27	9	7	46.5	8.85	2.64	Quantitation summary for protein	129/126	1.633	29	1.052	*	130/126	1.526	29	[1.062]		131/126	1.053	29	1.102	*	129/127	1.294	29	[1.059]		130/127	1.218	29	1.042	*	131/127	0.842	29	1.084	*	129/128	1.277	29	1.029	*	130/128	1.186
822	gi|53134059	hypothetical protein RCJMB04_22g22 [Gallus gallus]	1000	60850	42	31	13	9	20.5	8.92	0.98	Quantitation summary for protein	129/126	1.023	29	1.051	*	130/126	1.543	29	[1.074]		131/126	1.964	29	[1.148]		129/127	1.186	29	1.069	*	130/127	1.801	29	1.069	*	131/127	2.297	29	[1.133]		129/128	0.937	29	1.033	*	130/128	1.403
823	gi|53130638	hypothetical protein RCJMB04_9b24 [Gallus gallus]	999	27089	39	34	10	9	48.8	5.85	4.08	Quantitation summary for protein	129/126	1.101	27	1.047	*	130/126	0.835	27	[1.096]		131/126	0.686	27	1.168	*	129/127	1.277	27	[1.095]		130/127	0.975	27	1.057	*	131/127	0.803	27	[1.130]		129/128	1.029	27	[1.035]		130/128	0.775
824	gi|193880585	eukaryotic translation elongation factor 2, partial [Gallus gallus]	997	27241	60	44	12	9	64.9	9.21	8	Quantitation summary for protein	129/126	0.89	17	1.024	*	130/126	1.328	17	1.032	*	131/126	1.833	17	1.035	*	129/127	0.734	17	1.028	*	130/127	1.103	17	1.02	*	131/127	1.526	17	1.022	*	129/128	1.023	17	1.037	*	130/128	1.517
825	gi|363745284	PREDICTED: SEC14-like protein 2-like, partial [Gallus gallus]	996	21622	28	28	6	6	42.9	6.59	3.23	Quantitation summary for protein	129/126	1.417	23	1.089	*	130/126	0.88	23	1.077	*	131/126	0.831	23	[1.091]		129/127	1.371	23	1.14	*	130/127	0.858	23	1.036	*	131/127	0.811	23	1.064	*	129/128	1.117	23	1.039	*	130/128	0.689
826	gi|208610021	eukaryotic peptide chain release factor GTP-binding subunit ERF3A [Gallus gallus]	996	79071	47	36	19	14	31.4	5.07	1.17	Quantitation summary for protein	129/126	1.189	41	1.057	*	130/126	0.791	41	[1.070]		131/126	0.733	41	[1.145]		129/127	1.354	41	1.076	*	130/127	0.907	40	1.031	*	131/127	0.842	41	[1.111]		129/128	1.105	41	1.036	*	130/128	0.731
827	gi|5705960	immunoglobulin alpha heavy chain [Gallus gallus]	992	65988	30	29	9	8	16.1	4.58	0.55	Quantitation summary for protein	129/126	0.418	20	[1.072]		130/126	0.501	20	1.076	*	131/126	0.7	20	[1.195]		129/127	0.97	20	1.082		130/127	1.172	20	1.038	*	131/127	1.641	20	[1.165]		129/128	1.076	20	[1.078]		130/128	1.301
828	gi|1127800	CDC42 [Gallus gallus]	992	25726	41	35	7	6	37.2	6.15	2.82	Quantitation summary for protein	129/126	1.021	34	[1.097]		130/126	0.992	34	[1.114]		131/126	0.563	34	1.225	*	129/127	1.286	34	1.125	*	130/127	1.257	34	[1.117]		131/127	0.716	34	[1.170]		129/128	1.062	34	1.082	*	130/128	1.025
829	gi|363747167	PREDICTED: LOW QUALITY PROTEIN: very long-chain acyl-CoA synthetase, partial [Gallus gallus]	992	73940	36	34	10	10	19.2	8.77	1.09	Quantitation summary for protein	129/126	1.423	36	[1.087]		130/126	1.014	36	[1.081]		131/126	0.698	36	[1.120]		129/127	1.486	36	[1.109]		130/127	1.067	36	1.053	*	131/127	0.735	36	[1.099]		129/128	1.098	36	[1.136]		130/128	0.777
830	gi|50752997	PREDICTED: sulfide:quinone oxidoreductase, mitochondrial [Gallus gallus]	988	60194	39	36	13	12	35.6	9.29	1.11	Quantitation summary for protein	129/126	0.896	38	[1.038]		130/126	1.202	38	[1.071]		131/126	1.184	38	[1.126]		129/127	0.884	38	1.049	*	130/127	1.194	38	[1.049]		131/127	1.179	38	[1.108]		129/128	0.908	38	1.024	*	130/128	1.21
831	gi|363738644	PREDICTED: LOW QUALITY PROTEIN: glutathione peroxidase 1-like [Gallus gallus]	985	24111	43	38	9	8	55.4	7.74	3.18	Quantitation summary for protein	129/126	0.222	37	[1.224]		130/126	0.206	39	[1.199]		131/126	0.253	38	[1.221]		129/127	0.197	37	[1.213]		130/127	0.185	39	1.204	*	131/127	0.227	38	[1.210]		129/128	0.251	37	[1.203]		130/128	0.232
832	gi|226958424	protein kinase C and casein kinase substrate in neurons protein 2 isoform 1 [Gallus gallus]	984	67538	39	34	16	15	33.8	5.11	1.24	Quantitation summary for protein	129/126	0.99	35	1.056		130/126	1.056	35	[1.059]		131/126	1.035	35	1.06	*	129/127	1.001	35	1.056		130/127	1.076	35	1.035	*	131/127	1.057	35	[1.053]		129/128	1.058	35	[1.043]		130/128	1.122
833	gi|664925	GTP-binding protein [Gallus gallus]	982	26657	34	26	10	9	54.7	5.98	4.22	Quantitation summary for protein	129/126	1.256	30	[1.087]		130/126	0.983	30	[1.081]		131/126	0.78	30	[1.117]		129/127	1.374	30	[1.087]		130/127	1.082	30	[1.067]		131/127	0.861	30	[1.096]		129/128	1.21	30	[1.034]		130/128	0.941
834	gi|402507	ribosomal protein L30 [Gallus gallus]	982	16414	45	32	8	6	60	9.65	19.07	Quantitation summary for protein	129/126	1.159	40	1.053	*	130/126	1.129	40	1.058	*	131/126	1.244	40	[1.096]		129/127	1.036	40	1.08	*	130/127	1.016	40	1.043	*	131/127	1.122	40	[1.079]		129/128	1.196	40	1.054	*	130/128	1.157
835	gi|363729116	PREDICTED: importin-5 [Gallus gallus]	982	145224	39	34	15	11	16	4.89	0.46	Quantitation summary for protein	129/126	1.465	37	1.083	*	130/126	1.194	37	1.091	*	131/126	0.877	37	[1.204]		129/127	1.623	37	1.138	*	130/127	1.332	37	1.108	*	131/127	0.983	36	1.147		129/128	1.741	37	1.114	*	130/128	1.41
836	gi|50732421	PREDICTED: phosphotriesterase-related protein [Gallus gallus]	980	44473	46	35	12	8	31.5	6.1	1.93	Quantitation summary for protein	129/126	0.987	39	[1.062]		130/126	0.913	39	[1.053]		131/126	1.073	39	[1.097]		129/127	1.013	37	1.058		130/127	0.956	39	1.042	*	131/127	1.127	39	[1.075]		129/128	0.925	39	1.046	*	130/128	0.85
837	gi|50749765	PREDICTED: glutathione S-transferase omega-1 isoform 2 [Gallus gallus]	980	31731	53	43	16	13	64.9	6.97	7.93	Quantitation summary for protein	129/126	0.729	48	[1.074]		130/126	1.047	48	[1.109]		131/126	0.983	48	[1.236]		129/127	0.64	48	1.089	*	130/127	0.925	48	[1.076]		131/127	0.871	48	[1.206]		129/128	0.793	48	[1.038]		130/128	1.131
838	gi|363740327	PREDICTED: long-chain fatty acid transport protein 4 [Gallus gallus]	976	81676	50	42	15	13	28.6	8.71	0.8	Quantitation summary for protein	129/126	1.082	45	1.04	*	130/126	1.171	45	1.039	*	131/126	0.657	45	1.122	*	129/127	1.087	45	1.057	*	130/127	1.184	45	[1.046]		131/127	0.666	45	1.114	*	129/128	0.947	45	1.027	*	130/128	1.018
839	gi|363745044	PREDICTED: retinol dehydrogenase 16-like [Gallus gallus]	975	37235	45	40	11	11	38.5	9.28	3.65	Quantitation summary for protein	129/126	1.774	42	[1.054]		130/126	1.102	42	[1.069]		131/126	0.667	42	[1.117]		129/127	2.247	42	[1.108]		130/127	1.405	42	[1.086]		131/127	0.845	41	1.078	*	129/128	1.124	42	1.026	*	130/128	0.694
840	gi|363738482	PREDICTED: inter-alpha-trypsin inhibitor heavy chain H3 [Gallus gallus]	972	116604	50	41	17	13	18.5	5.85	0.6	Quantitation summary for protein	129/126	0.895	35	1.077	*	130/126	0.844	34	1.056	*	131/126	0.959	35	[1.171]		129/127	0.927	35	1.069	*	130/127	0.9	35	1.049	*	131/127	1.003	35	[1.151]		129/128	0.993	35	[1.061]		130/128	0.951
841	gi|53133542	hypothetical protein RCJMB04_17k23 [Gallus gallus]	971	33156	49	35	12	10	53.9	6.92	2.14	Quantitation summary for protein	129/126	1.051	35	1.042	*	130/126	0.954	35	1.038	*	131/126	0.837	35	[1.092]		129/127	1.325	35	[1.054]		130/127	1.211	35	1.04	*	131/127	1.065	35	1.092	*	129/128	0.922	35	[1.027]		130/128	0.831
842	gi|53133328	hypothetical protein RCJMB04_15i11 [Gallus gallus]	969	52541	26	24	9	7	24.8	5.66	0.73	Quantitation summary for protein	129/126	1.103	25	[1.033]		130/126	0.984	25	[1.054]		131/126	0.879	25	[1.085]		129/127	1.075	25	1.052	*	130/127	0.966	25	1.047	*	131/127	0.864	25	[1.070]		129/128	1.122	24	1.02	*	130/128	0.961
843	gi|293632001	NADH dehydrogenase ubiquinone 1 alpha subcomplex 12 transcript variant 1 [Gallus gallus]	969	19918	40	30	6	6	38.4	9.57	1.56	Quantitation summary for protein	129/126	0.836	38	[1.045]		130/126	1.149	38	1.019	*	131/126	1.236	38	[1.057]		129/127	0.732	38	1.06	*	130/127	1.013	38	1.031	*	131/127	1.092	38	[1.045]		129/128	0.83	38	[1.033]		130/128	1.134
844	gi|53132771	hypothetical protein RCJMB04_13p14 [Gallus gallus]	966	72877	54	42	26	21	45.6	5.79	2.43	Quantitation summary for protein	129/126	1.119	49	1.049	*	130/126	1.098	49	[1.103]		131/126	1.131	49	[1.184]		129/127	1	49	1.06		130/127	0.988	49	[1.088]		131/127	1.02	49	[1.166]		129/128	1.086	49	[1.020]		130/128	1.059
845	gi|50751150	PREDICTED: calcyclin-binding protein [Gallus gallus]	966	33483	42	35	12	10	57.5	8.59	2.1	Quantitation summary for protein	129/126	1.068	34	1.028	*	130/126	0.915	35	[1.077]		131/126	1.12	35	[1.132]		129/127	1.093	35	1.04	*	130/127	0.94	35	[1.045]		131/127	1.153	35	[1.095]		129/128	1.215	35	1.02	*	130/128	1.032
846	gi|138533	RecName: Full=Vimentin	965	58667	43	37	15	14	31.3	5.09	1.39	Quantitation summary for protein	129/126	0.665	17	1.049	*	130/126	0.927	17	[1.101]		131/126	0.995	17	[1.176]		129/127	0.786	17	[1.094]		130/127	1.102	17	1.049	*	131/127	1.187	17	1.112	*	129/128	0.668	17	1.063	*	130/128	0.924
847	gi|6448447	mitochondrial carrier homolog 2 [Gallus gallus]	960	36828	50	42	9	5	26.8	9.38	1.17	Quantitation summary for protein	129/126	0.97	48	1.049	*	130/126	1.353	48	1.029	*	131/126	0.882	48	[1.064]		129/127	1.109	48	1.05	*	130/127	1.558	48	1.04	*	131/127	1.018	48	[1.068]		129/128	0.87	48	[1.029]		130/128	1.205
848	gi|50745642	PREDICTED: ribose-phosphate pyrophosphokinase 1 isoform 2 [Gallus gallus]	958	40738	49	38	11	11	30.5	6.45	2.49	Quantitation summary for protein	129/126	0.994	2	1.083		130/126	0.87	2	1.096		131/126	0.814	2	1.167		129/127	0.91	2	1.037		130/127	0.802	2	1.026		131/127	0.753	2	1.039		129/128	0.909	2	1.035		130/128	0.791
849	gi|347361001	vesicle-fusing ATPase [Gallus gallus]	956	96158	40	37	14	13	20.9	6.38	0.77	Quantitation summary for protein	129/126	1.063	36	1.033	*	130/126	0.934	36	1.021	*	131/126	0.822	36	1.039	*	129/127	1.116	36	[1.041]		130/127	0.987	36	1.031	*	131/127	0.87	36	[1.048]		129/128	1.07	36	1.023	*	130/128	0.93
850	gi|435037	alpha-N-acetylgalactosaminidase, partial [Gallus gallus]	955	49536	47	37	15	12	34.8	5.8	1.63	Quantitation summary for protein	129/126	0.866	43	1.058	*	130/126	0.957	43	1.091	*	131/126	0.909	43	1.125	*	129/127	0.879	43	1.067	*	130/127	0.979	43	[1.092]		131/127	0.932	43	1.098	*	129/128	0.955	43	1.032	*	130/128	1.049
851	gi|53127312	hypothetical protein RCJMB04_1m9 [Gallus gallus]	954	87138	42	35	11	8	20	10.37	0.56	Quantitation summary for protein	129/126	0.851	39	1.063	*	130/126	0.861	39	[1.086]		131/126	1.286	39	[1.202]		129/127	1.148	39	1.079	*	130/127	1.169	39	1.084	*	131/127	1.75	39	1.18	*	129/128	0.94	39	1.034	*	130/128	0.945
852	gi|460417317	uncharacterized oxidoreductase-like isoform 1 [Gallus gallus]	954	31654	49	41	12	10	50.4	9.15	4.46	Quantitation summary for protein	129/126	1.044	31	1.036	*	130/126	0.958	31	[1.062]		131/126	1.006	31	[1.139]		129/127	1.114	30	1.04	*	130/127	1.038	30	1.039	*	131/127	1.05	30	1.093	*	129/128	1.018	31	1.036	*	130/128	0.928
853	gi|53136370	hypothetical protein RCJMB04_27o18 [Gallus gallus]	952	50546	59	47	14	11	37.6	9.05	2.12	Quantitation summary for protein	129/126	0.639	52	[1.117]		130/126	0.93	49	1.086	*	131/126	1.105	49	[1.171]		129/127	0.78	49	1.109	*	130/127	1.132	48	1.062	*	131/127	1.348	48	[1.136]		129/128	0.772	52	1.088	*	130/128	1.118
854	gi|50750513	PREDICTED: COBL-like 1 [Gallus gallus]	952	149588	53	40	23	19	22.4	7.29	0.57	Quantitation summary for protein	129/126	0.835	44	[1.046]		130/126	0.827	43	1.045	*	131/126	0.742	43	[1.097]		129/127	0.935	43	[1.065]		130/127	0.933	43	[1.027]		131/127	0.839	43	[1.082]		129/128	0.931	43	1.022	*	130/128	0.916
855	gi|212528	p38c-crk [Gallus gallus]	947	36878	31	26	9	8	32.5	5.36	1.81	Quantitation summary for protein	129/126	1.058	30	1.064	*	130/126	0.925	30	1.081	*	131/126	0.96	30	1.093	*	129/127	1.113	30	1.107	*	130/127	0.979	30	[1.040]		131/127	1.019	30	1.05	*	129/128	1.167	29	1.031	*	130/128	1.014
856	gi|53127712	hypothetical protein RCJMB04_3a24 [Gallus gallus]	945	48290	38	27	11	9	33.2	6.19	1.36	Quantitation summary for protein	129/126	1.419	28	[1.101]		130/126	0.817	28	[1.082]		131/126	0.881	28	[1.161]		129/127	1.595	28	[1.145]		130/127	0.925	28	1.046	*	131/127	0.999	28	1.121		129/128	1.231	28	1.044	*	130/128	0.704
857	gi|361549440	peptidyl-prolyl cis-trans isomerase FKBP8 [Gallus gallus]	944	51343	37	33	11	11	32	4.8	1.24	Quantitation summary for protein	129/126	1.191	37	[1.045]		130/126	1.012	36	1.033	*	131/126	1.129	35	1.037	*	129/127	1.182	35	[1.053]		130/127	1.012	35	1.027	*	131/127	1.132	35	1.025	*	129/128	1.137	37	[1.024]		130/128	0.96
858	gi|53131944	hypothetical protein RCJMB04_12g8 [Gallus gallus]	944	43984	76	54	22	18	70.3	7.66	7.17	Quantitation summary for protein	129/126	0.954	64	1.052	*	130/126	1.023	64	[1.080]		131/126	1.394	64	[1.117]		129/127	0.914	64	[1.090]		130/127	0.987	64	1.048	*	131/127	1.349	64	[1.087]		129/128	1.017	63	1.028	*	130/128	1.082
859	gi|4468189	sarcoendoplasmic reticulum calcium ATPase [Gallus gallus]	943	128582	41	35	12	11	12.2	5.74	0.49	Quantitation summary for protein	129/126	0.501	4	1.29	*	130/126	1.35	4	1.156	*	131/126	1.569	4	1.23	*	129/127	0.662	4	1.239	*	130/127	1.797	4	1.212	*	131/127	2.094	4	1.238	*	129/128	0.487	4	1.318	*	130/128	1.304
860	gi|363747386	PREDICTED: citrate synthase, mitochondrial-like [Gallus gallus]	943	46829	36	29	9	9	23.6	6.5	1.59	Quantitation summary for protein	129/126	0.919	3	1.065		130/126	0.634	3	1.264		131/126	0.308	3	1.725		129/127	1.018	3	1.035		130/127	0.707	3	1.24		131/127	0.344	3	1.716		129/128	0.91	3	1.032	*	130/128	0.623
861	gi|60099125	hypothetical protein RCJMB04_27o21 [Gallus gallus]	942	59091	31	30	9	8	19.3	7.66	0.54	Quantitation summary for protein	129/126	0.952	30	1.031	*	130/126	1.07	30	[1.026]		131/126	1.061	30	[1.064]		129/127	0.961	30	1.044	*	130/127	1.087	30	1.02	*	131/127	1.081	30	[1.047]		129/128	1.103	30	1.017	*	130/128	1.231
862	gi|53136708	hypothetical protein RCJMB04_32l4 [Gallus gallus]	941	72712	51	39	16	13	28.4	8.41	1.03	Quantitation summary for protein	129/126	1.065	39	1.044	*	130/126	0.912	40	1.042	*	131/126	0.878	40	[1.072]		129/127	1.253	40	[1.059]		130/127	1.038	40	1.041	*	131/127	1.002	40	[1.058]		129/128	1.093	40	[1.042]		130/128	0.894
863	gi|363740430	PREDICTED: golgin subfamily A member 2 [Gallus gallus]	941	134909	56	47	22	18	21.5	5.14	0.58	Quantitation summary for protein	129/126	1.19	45	1.021	*	130/126	1.066	47	[1.030]		131/126	1.158	47	[1.056]		129/127	1.255	47	1.029	*	130/127	1.132	47	1.031	*	131/127	1.232	47	[1.045]		129/128	1.18	47	[1.027]		130/128	1.051
864	gi|3309261	signal transducer and activator of transcription 5B [Gallus gallus]	940	100390	42	31	16	10	21.2	5.9	0.62	Quantitation summary for protein	129/126	0.921	32	[1.047]		130/126	0.935	32	1.025	*	131/126	0.741	32	[1.060]		129/127	1.081	32	1.055	*	130/127	1.105	32	1.022	*	131/127	0.878	32	[1.057]		129/128	0.95	32	[1.038]		130/128	0.958
865	gi|793834	ribosomal protein S6 [Gallus gallus]	938	36829	41	30	15	11	36.9	10.83	4.13	Quantitation summary for protein	129/126	1.209	35	[1.080]		130/126	0.909	35	[1.070]		131/126	0.868	35	[1.208]		129/127	1.132	35	[1.114]		130/127	0.857	35	[1.076]		131/127	0.821	35	[1.219]		129/128	1.08	35	1.036	*	130/128	0.807
866	gi|222868	T-protein [Gallus gallus]	936	45696	41	35	9	9	18.6	9.12	1.84	Quantitation summary for protein	129/126	1.278	37	1.109	*	130/126	1.227	37	[1.150]		131/126	1.272	37	[1.178]		129/127	0.992	37	[1.150]		130/127	0.959	37	[1.111]		131/127	0.997	37	[1.157]		129/128	1.121	36	1.06	*	130/128	1.061
867	gi|363744640	PREDICTED: alpha-mannosidase 2 [Gallus gallus]	931	147205	43	38	13	13	14.2	6.92	0.36	Quantitation summary for protein	129/126	1.393	38	1.041	*	130/126	1.214	38	1.029	*	131/126	1.169	38	1.052	*	129/127	1.407	38	1.048	*	130/127	1.234	38	1.03	*	131/127	1.192	38	1.04	*	129/128	1.446	38	[1.050]		130/128	1.252
868	gi|53130318	hypothetical protein RCJMB04_6o19 [Gallus gallus]	930	58460	44	40	15	14	34.6	5.53	1.83	Quantitation summary for protein	129/126	1.197	42	[1.039]		130/126	0.995	42	[1.033]		131/126	0.751	41	1.047	*	129/127	1.289	42	[1.048]		130/127	1.078	42	1.037	*	131/127	0.84	42	1.051	*	129/128	1.202	42	1.023	*	130/128	0.992
869	gi|517091	transrationally controlled tumor protein [Gallus gallus]	929	23126	27	25	6	5	38.4	4.9	2.87	Quantitation summary for protein	129/126	0.86	26	[1.150]		130/126	1.253	26	[1.095]		131/126	1.692	26	1.139	*	129/127	0.71	26	[1.219]		130/127	1.042	26	1.044	*	131/127	1.411	26	[1.136]		129/128	1.147	26	1.052	*	130/128	1.659
870	gi|363742805	PREDICTED: uncharacterized protein LOC100857958 [Gallus gallus]	928	79826	32	29	12	10	21.4	5.32	0.76	Quantitation summary for protein	129/126	1.012	32	[1.057]		130/126	0.944	29	[1.058]		131/126	1.007	30	[1.081]		129/127	0.967	32	1.067	*	130/127	0.891	28	1.04	*	131/127	0.97	30	[1.086]		129/128	0.993	31	1.044		130/128	0.919
871	gi|63781	ribosomal protein S17 (AA 7-135) [Gallus gallus]	925	18093	38	29	12	9	69	9.64	12.01	Quantitation summary for protein	129/126	1.075	36	1.062	*	130/126	1.055	35	[1.183]		131/126	1.443	36	[1.290]		129/127	0.981	36	1.097		130/127	0.97	35	[1.110]		131/127	1.329	36	[1.209]		129/128	1.126	35	1.041	*	130/128	1.1
872	gi|363736344	PREDICTED: LOW QUALITY PROTEIN: protein PRRC2C-like [Gallus gallus]	924	333840	41	26	18	12	7.9	9.07	0.16	Quantitation summary for protein	129/126	0.982	36	1.035	*	130/126	0.893	35	1.035	*	131/126	1.007	36	[1.055]		129/127	1.062	36	1.036	*	130/127	0.991	36	[1.027]		131/127	1.099	36	1.039	*	129/128	1.072	36	1.032	*	130/128	0.987
873	gi|53130772	hypothetical protein RCJMB04_10a7 [Gallus gallus]	919	63849	34	34	8	8	24.2	5.07	0.74	Quantitation summary for protein	129/126	1.293	34	1.052	*	130/126	0.937	34	[1.081]		131/126	0.853	34	[1.146]		129/127	1.358	34	1.076	*	130/127	0.991	34	[1.054]		131/127	0.904	34	[1.115]		129/128	1.178	34	[1.030]		130/128	0.849
874	gi|363746070	PREDICTED: protein ETHE1, mitochondrial, partial [Gallus gallus]	919	16536	25	25	6	6	40.7	10.21	5.44	Quantitation summary for protein	129/126	0.822	24	1.069	*	130/126	1.12	25	1.082	*	131/126	1.282	25	1.101	*	129/127	0.757	25	1.091	*	130/127	1.004	25	1.06		131/127	1.152	25	1.073	*	129/128	0.902	25	1.046	*	130/128	1.181
875	gi|2780941	Chain A, Chicken Citrate Synthase Complex With Trifluoroacetonyl-Coa And Citrate	917	53691	36	30	8	8	18.1	7.36	1.04	Quantitation summary for protein	129/126	0.709	3	1.1	*	130/126	1.242	3	1.027	*	131/126	0.88	3	1.028	*	129/127	0.545	3	1.055	*	130/127	0.961	3	1.041		131/127	0.682	3	1.018	*	129/128	0.828	3	1.082		130/128	1.441
876	gi|363741381	PREDICTED: protein KIAA0664 [Gallus gallus]	914	170973	57	40	17	13	13.7	5.73	0.43	Quantitation summary for protein	129/126	1.078	46	[1.046]		130/126	0.882	46	1.042	*	131/126	0.757	46	[1.094]		129/127	1.163	46	1.049	*	130/127	0.957	46	[1.036]		131/127	0.823	46	[1.081]		129/128	0.903	46	[1.033]		130/128	0.733
877	gi|211776	cysteine-rich fibroblast growth factor receptor [Gallus gallus]	914	153268	57	50	19	18	16.6	6.47	0.49	Quantitation summary for protein	129/126	1.096	55	1.015	*	130/126	0.885	55	1.036	*	131/126	0.69	55	1.066	*	129/127	1.482	55	1.039	*	130/127	1.205	55	1.03	*	131/127	0.941	55	[1.043]		129/128	1.028	55	1.022	*	130/128	0.824
878	gi|10944786	guanylate binding protein [Gallus gallus]	913	74055	40	30	14	10	26.7	6.24	1	Quantitation summary for protein	129/126	0.888	28	1.053	*	130/126	0.782	28	[1.050]		131/126	0.526	28	1.065	*	129/127	1.537	28	1.065	*	130/127	1.363	28	[1.039]		131/127	0.919	28	1.049	*	129/128	0.919	27	1.037	*	130/128	0.833
879	gi|314122187	CDGSH iron sulfur domain-containing protein 1 [Gallus gallus]	912	15120	30	26	4	4	48.1	8.84	4.08	Quantitation summary for protein	129/126	0.758	27	1.063	*	130/126	1.036	27	[1.057]		131/126	0.77	27	[1.112]		129/127	0.744	27	1.039	*	130/127	1.024	27	1.039	*	131/127	0.763	27	[1.090]		129/128	0.75	27	1.042	*	130/128	1.018
880	gi|16323037	DEAD box protein DDX1 [Gallus gallus]	911	97208	39	30	15	14	20.5	6.64	0.88	Quantitation summary for protein	129/126	1.128	35	[1.084]		130/126	1.002	35	[1.107]		131/126	0.915	35	[1.251]		129/127	1.14	35	[1.090]		130/127	1.019	35	[1.086]		131/127	0.933	35	[1.234]		129/128	1.179	35	1.031	*	130/128	1.041
881	gi|118084276	PREDICTED: 28S ribosomal protein S9, mitochondrial isoform 2 [Gallus gallus]	909	50345	30	27	12	11	38.7	9.5	1.59	Quantitation summary for protein	129/126	0.954	30	1.054	*	130/126	1.092	30	[1.052]		131/126	1.193	30	1.09	*	129/127	0.758	30	[1.074]		130/127	0.874	30	1.035	*	131/127	0.957	30	[1.096]		129/128	0.929	30	[1.049]		130/128	1.057
882	gi|118096162	PREDICTED: uncharacterized oxidoreductase C663.09c-like [Gallus gallus]	908	31155	61	47	8	8	28.2	8.52	5.19	Quantitation summary for protein	129/126	1.553	10	1.106	*	130/126	0.974	10	1.13		131/126	1.616	10	1.333	*	129/127	1.31	10	1.132	*	130/127	0.828	10	[1.093]		131/127	1.376	10	1.292	*	129/128	1.236	10	[1.129]		130/128	0.807
883	gi|118093746	PREDICTED: actin-related protein 2/3 complex subunit 2 [Gallus gallus]	907	41139	57	39	17	10	49.7	6.84	2.18	Quantitation summary for protein	129/126	0.993	42	[1.056]		130/126	0.705	42	[1.123]		131/126	0.735	42	[1.242]		129/127	1.147	42	1.078	*	130/127	0.82	42	1.083	*	131/127	0.857	42	[1.198]		129/128	0.882	42	1.038	*	130/128	0.622
884	gi|53127660	hypothetical protein RCJMB04_2o2 [Gallus gallus]	902	102431	36	35	11	11	17.8	5.07	0.6	Quantitation summary for protein	129/126	1.007	35	1.056		130/126	1.181	35	1.036	*	131/126	1.221	35	1.06	*	129/127	1.156	35	1.056	*	130/127	1.365	35	1.049	*	131/127	1.414	35	1.052	*	129/128	1.104	35	1.045	*	130/128	1.286
885	gi|53133416	hypothetical protein RCJMB04_16g4 [Gallus gallus]	902	64484	67	52	23	20	46.7	6.07	2.64	Quantitation summary for protein	129/126	1.144	62	[1.034]		130/126	0.906	62	[1.049]		131/126	0.768	62	[1.083]		129/127	1.214	62	[1.042]		130/127	0.963	61	1.027	*	131/127	0.822	62	[1.066]		129/128	1.141	62	1.02	*	130/128	0.898
886	gi|363736766	PREDICTED: cytochrome b-c1 complex subunit 6, mitochondrial [Gallus gallus]	901	11716	25	24	5	5	69.8	4.97	3.66	Quantitation summary for protein	129/126	0.909	23	1.138	*	130/126	0.978	24	1.132		131/126	1.259	24	1.232	*	129/127	1.02	23	1.112		130/127	1.043	24	1.12		131/127	1.346	24	1.187	*	129/128	0.804	24	1.152	*	130/128	1.043
887	gi|114243	RecName: Full=Arylamine N-acetyltransferase, liver isozyme; Short=Arylamine acetylase	900	39080	44	39	9	9	40.4	5.56	2.67	Quantitation summary for protein	129/126	0.715	43	1.056	*	130/126	1.193	43	[1.077]		131/126	0.886	43	1.108	*	129/127	0.617	43	[1.067]		130/127	1.037	43	1.057	*	131/127	0.772	43	1.095	*	129/128	0.825	43	[1.061]		130/128	1.368
888	gi|363737680	PREDICTED: probable threonyl-tRNA synthetase 2, cytoplasmic [Gallus gallus]	899	104065	47	36	16	12	19	6.55	0.64	Quantitation summary for protein	129/126	1.202	27	1.036	*	130/126	1.06	25	1.025	*	131/126	0.953	27	1.04	*	129/127	1.192	27	1.034	*	130/127	1.054	27	[1.030]		131/127	0.954	27	1.031	*	129/128	1.17	27	1.031	*	130/128	1.021
889	gi|50736146	PREDICTED: NADH dehydrogenase [ubiquinone] iron-sulfur protein 6, mitochondrial isoform 3 [Gallus gallus]	899	16381	27	26	6	6	52.3	9.22	4.4	Quantitation summary for protein	129/126	0.788	27	1.081	*	130/126	0.791	27	1.194	*	131/126	0.672	27	1.362	*	129/127	0.839	27	[1.163]		130/127	0.848	27	1.102	*	131/127	0.722	27	1.3	*	129/128	0.762	27	1.048	*	130/128	0.76
890	gi|53136582	hypothetical protein RCJMB04_31d24 [Gallus gallus]	899	40045	39	35	8	7	32.3	7.68	2.04	Quantitation summary for protein	129/126	1.004	33	[1.046]		130/126	0.943	34	[1.097]		131/126	1.049	34	[1.197]		129/127	1.027	33	1.057	*	130/127	0.969	34	[1.069]		131/127	1.08	34	[1.161]		129/128	0.955	33	[1.060]		130/128	0.882
891	gi|53130764	hypothetical protein RCJMB04_9p4 [Gallus gallus]	897	24133	74	47	11	9	54.2	4.7	7.01	Quantitation summary for protein	129/126	1.178	45	[1.081]		130/126	1.024	45	[1.077]		131/126	1.105	45	[1.129]		129/127	1.148	45	[1.123]		130/127	1.005	45	1.056		131/127	1.086	45	[1.099]		129/128	0.992	45	1.035		130/128	0.857
892	gi|363739993	PREDICTED: mevalonate kinase [Gallus gallus]	896	38250	30	30	10	10	29.5	7.05	1.29	Quantitation summary for protein	129/126	1.288	30	[1.135]		130/126	0.95	30	1.168		131/126	0.79	30	[1.225]		129/127	1.25	30	[1.141]		130/127	0.929	30	[1.143]		131/127	0.773	30	[1.193]		129/128	1.359	30	[1.169]		130/128	0.967
893	gi|50760791	PREDICTED: interferon-induced 35 kDa protein [Gallus gallus]	895	50251	35	29	10	9	32.9	5.09	1.43	Quantitation summary for protein	129/126	0.768	33	1.057	*	130/126	0.65	33	[1.134]		131/126	0.683	34	1.151	*	129/127	1.274	33	[1.064]		130/127	1.087	33	[1.117]		131/127	1.141	34	1.11	*	129/128	0.888	33	[1.052]		130/128	0.747
894	gi|50730609	PREDICTED: gamma-glutamylaminecyclotransferase-like isoform 2 [Gallus gallus]	894	21176	52	45	7	7	47.6	6.51	6.83	Quantitation summary for protein	129/126	0.875	50	[1.092]		130/126	1.196	50	[1.169]		131/126	1.536	50	[1.312]		129/127	0.721	50	1.052	*	130/127	0.992	50	1.074		131/127	1.278	50	[1.203]		129/128	1.1	50	[1.048]		130/128	1.493
895	gi|363738498	PREDICTED: putative RNA-binding protein 15B [Gallus gallus]	892	100529	42	32	12	8	9.3	9.32	0.42	Quantitation summary for protein	129/126	1.45	33	[1.066]		130/126	1.097	33	[1.097]		131/126	1.211	33	[1.234]		129/127	1.372	33	[1.093]		130/127	1.045	33	1.075	*	131/127	1.156	33	[1.226]		129/128	1.657	33	[1.060]		130/128	1.245
896	gi|4469173	delta-9 desaturase [Gallus gallus]	889	45386	61	49	9	9	21	8.8	2.07	Quantitation summary for protein	129/126	1.257	53	[1.044]		130/126	1.008	53	[1.070]		131/126	0.548	50	1.136	*	129/127	1.206	52	1.054	*	130/127	0.962	53	1.048	*	131/127	0.525	50	1.128	*	129/128	1.289	53	1.038	*	130/128	1.026
897	gi|135824	RecName: Full=Thiosulfate sulfurtransferase; AltName: Full=Rhodanese	889	37078	46	39	9	6	21.1	6.56	1.56	Quantitation summary for protein	129/126	0.915	20	1.058	*	130/126	1.021	20	1.083		131/126	1.059	20	1.079	*	129/127	1.07	20	[1.059]		130/127	1.202	20	1.07	*	131/127	1.25	20	1.058	*	129/128	0.953	20	1.068	*	130/128	1.057
898	gi|53127778	hypothetical protein RCJMB04_3f20 [Gallus gallus]	889	55749	46	37	16	14	41.2	8.1	1.81	Quantitation summary for protein	129/126	1.075	42	[1.050]		130/126	0.963	42	[1.048]		131/126	0.975	42	[1.083]		129/127	0.986	42	[1.071]		130/127	0.889	42	[1.028]		131/127	0.902	42	1.069	*	129/128	1.142	42	1.023	*	130/128	1.016
899	gi|53127125	hypothetical protein RCJMB04_1j5 [Gallus gallus]	888	57508	35	27	11	9	29.9	5.11	1.3	Quantitation summary for protein	129/126	0.968	23	[1.107]		130/126	1.051	23	1.119	*	131/126	1.047	23	[1.162]		129/127	0.952	23	1.13		130/127	1.041	23	1.094	*	131/127	1.04	23	1.145		129/128	1.006	23	1.059		130/128	1.085
900	gi|53134115	hypothetical protein RCJMB04_22k15 [Gallus gallus]	887	62021	35	27	15	11	30.4	6.51	1.53	Quantitation summary for protein	129/126	1.184	31	1.101	*	130/126	0.884	30	[1.145]		131/126	0.87	30	[1.237]		129/127	1.187	31	1.131	*	130/127	0.885	29	1.067	*	131/127	0.882	30	1.177	*	129/128	1.139	30	[1.054]		130/128	0.845
901	gi|48479076	ribosomal protein S13 [Gallus gallus]	883	21566	71	53	13	9	52.3	10.53	6.59	Quantitation summary for protein	129/126	1.044	59	1.026	*	130/126	0.952	59	[1.050]		131/126	1.206	59	[1.106]		129/127	0.976	59	1.035	*	130/127	0.897	59	1.034	*	131/127	1.138	59	[1.092]		129/128	1.099	59	[1.022]		130/128	0.996
902	gi|118094652	PREDICTED: thioredoxin domain-containing protein 12 [Gallus gallus]	883	22674	40	34	10	8	63.5	5.51	5.9	Quantitation summary for protein	129/126	0.997	39	1.049		130/126	1.038	39	[1.057]		131/126	1.422	39	[1.057]		129/127	0.907	37	1.05	*	130/127	0.964	39	1.061	*	131/127	1.323	39	[1.075]		129/128	1.263	39	[1.047]		130/128	1.307
903	gi|12964598	branched-chain alpha-keto acid dehydrogenase E1-alpha subunit [Gallus gallus]	883	52789	28	24	6	4	19	8.63	0.44	Quantitation summary for protein	129/126	0.915	24	1.024	*	130/126	1.032	26	1.067	*	131/126	0.792	26	[1.183]		129/127	0.831	26	1.029	*	130/127	0.92	26	[1.052]		131/127	0.708	26	[1.172]		129/128	0.9	26	1.033	*	130/128	0.984
904	gi|53130169	hypothetical protein RCJMB04_6i8 [Gallus gallus]	879	45641	31	28	9	8	27	6.03	1.16	Quantitation summary for protein	129/126	1.176	31	1.024	*	130/126	0.865	31	[1.106]		131/126	0.732	31	[1.161]		129/127	1.262	31	[1.061]		130/127	0.906	30	1.045	*	131/127	0.793	31	[1.105]		129/128	1.165	31	[1.032]		130/128	0.851
905	gi|363743891	PREDICTED: regulator of nonsense transcripts 1 [Gallus gallus]	877	136685	47	38	19	15	19.6	6.89	0.57	Quantitation summary for protein	129/126	1.114	40	1.031	*	130/126	1.058	40	1.042	*	131/126	1.089	40	1.072	*	129/127	1.134	40	1.042	*	130/127	1.084	40	1.04	*	131/127	1.119	40	1.063	*	129/128	1.058	40	1.033	*	130/128	0.999
906	gi|53132829	hypothetical protein RCJMB04_14a13 [Gallus gallus]	876	93864	49	39	13	9	17.5	6.34	0.67	Quantitation summary for protein	129/126	1.071	17	1.022	*	130/126	0.876	16	1.02	*	131/126	0.682	17	1.08	*	129/127	1.187	16	1.018	*	130/127	0.977	17	1.029	*	131/127	0.753	17	[1.064]		129/128	1.111	17	1.016	*	130/128	0.914
907	gi|63333	unnamed protein product [Gallus gallus]	875	88833	49	39	17	15	27.1	4.88	0.85	Quantitation summary for protein	129/126	1.253	2	1.192		130/126	1.029	2	1.243		131/126	1.241	2	1.855		129/127	1.047	2	1.355		130/127	0.866	2	1.3		131/127	1.046	2	1.148		129/128	0.994	2	1.251		130/128	0.81
908	gi|63765	ras-like protein [Gallus gallus]	874	28937	36	30	8	8	32.9	7.7	2.69	Quantitation summary for protein	129/126	1.013	32	[1.079]		130/126	0.998	32	1.075		131/126	1.371	32	[1.218]		129/127	1.056	32	[1.089]		130/127	1.048	32	[1.064]		131/127	1.442	32	[1.216]		129/128	1.133	32	1.033	*	130/128	1.095
909	gi|50737088	PREDICTED: ubiquitin carboxyl-terminal hydrolase 14 isoform 2 [Gallus gallus]	873	65905	35	31	9	7	23.8	5.09	0.55	Quantitation summary for protein	129/126	1.126	33	1.032	*	130/126	1.04	33	[1.057]		131/126	1.135	33	1.054	*	129/127	1.026	33	1.029	*	130/127	0.954	33	[1.059]		131/127	1.044	33	1.053	*	129/128	1.12	33	[1.032]		130/128	1.028
910	gi|363733743	PREDICTED: glutamyl aminopeptidase [Gallus gallus]	873	119077	40	35	14	12	17.1	4.98	0.58	Quantitation summary for protein	129/126	2.575	40	1.094	*	130/126	1.398	40	[1.053]		131/126	1.607	40	1.071	*	129/127	2.639	40	1.097	*	130/127	1.442	40	1.049	*	131/127	1.661	40	1.071	*	129/128	2.818	40	1.13	*	130/128	1.446
911	gi|118083958	PREDICTED: cystathionine beta-synthase [Gallus gallus]	871	73196	40	38	12	11	23.3	7.51	0.69	Quantitation summary for protein	129/126	0.983	38	[1.045]		130/126	1.06	38	1.037	*	131/126	0.96	37	1.061	*	129/127	0.938	38	1.056	*	130/127	0.934	37	1.025	*	131/127	0.919	38	1.077	*	129/128	0.715	38	1.04	*	130/128	0.765
912	gi|60098813	hypothetical protein RCJMB04_10n19 [Gallus gallus]	870	16173	19	16	6	4	50.7	9.16	1.58	Quantitation summary for protein	129/126	0.958	16	1.092		130/126	0.871	16	1.078	*	131/126	0.849	16	1.136	*	129/127	0.914	16	1.183	*	130/127	0.837	16	1.118	*	131/127	0.817	16	1.125	*	129/128	1.021	16	1.048		130/128	0.922
913	gi|1142718	Cu/Zn superoxide dismutase [Gallus gallus]	868	18500	61	39	11	9	53.9	6.1	38.52	Quantitation summary for protein	129/126	0.553	52	1.182	*	130/126	0.738	52	[1.290]		131/126	0.844	52	[1.822]		129/127	0.572	52	1.209	*	130/127	0.768	52	[1.177]		131/127	0.88	52	[1.681]		129/128	0.626	52	1.146	*	130/128	0.83
914	gi|363733064	PREDICTED: uncharacterized protein LOC100857197 [Gallus gallus]	868	21648	26	22	6	5	35.7	5.16	1.74	Quantitation summary for protein	129/126	1.106	22	1.065	*	130/126	1.199	22	[1.176]		131/126	1.503	22	1.349	*	129/127	0.851	22	[1.149]		130/127	0.929	22	[1.093]		131/127	1.167	22	[1.269]		129/128	1.035	22	1.036	*	130/128	1.115
915	gi|12964602	branched-chain alpha-keto acid dihydrolipoyl acyltransferase [Gallus gallus]	867	63072	39	30	14	11	30.2	8.75	1.63	Quantitation summary for protein	129/126	0.953	35	[1.062]		130/126	1.687	35	[1.118]		131/126	2.26	35	[1.190]		129/127	0.716	35	[1.112]		130/127	1.275	35	[1.067]		131/127	1.712	35	1.131	*	129/128	0.968	35	1.034	*	130/128	1.703
916	gi|209892841	CAPN1 [Gallus gallus]	866	89233	51	38	16	14	26	4.93	0.78	Quantitation summary for protein	129/126	---	1	---		130/126	---	1	---		131/126	---	1	---		129/127	---	1	---		130/127	---	1	---		131/127	---	1	---		129/128	---	1	---		130/128	---
917	gi|363741413	PREDICTED: RNA-binding protein 12-like [Gallus gallus]	865	102379	52	38	16	12	16.4	8.73	0.6	Quantitation summary for protein	129/126	0.924	44	1.03	*	130/126	0.8	44	1.045	*	131/126	0.575	44	[1.089]		129/127	1.078	44	[1.043]		130/127	0.938	43	1.023	*	131/127	0.677	44	1.073	*	129/128	1.067	44	1.018	*	130/128	0.918
918	gi|1944138	2~,5~-oligo adenylate synthetase A [Gallus gallus]	864	66618	36	34	13	11	30.2	7.94	0.96	Quantitation summary for protein	129/126	0.306	21	1.1	*	130/126	0.429	21	1.092	*	131/126	0.415	21	[1.152]		129/127	1.171	21	1.061	*	130/127	1.688	20	1.052	*	131/127	1.602	21	[1.124]		129/128	0.582	21	1.056	*	130/128	0.811
919	gi|363747224	PREDICTED: trans-1,2-dihydrobenzene-1,2-diol dehydrogenase-like, partial [Gallus gallus]	864	30669	37	31	12	12	55.6	7.74	2.82	Quantitation summary for protein	129/126	1.319	33	1.072	*	130/126	1.312	33	[1.091]		131/126	1.265	33	1.081	*	129/127	0.95	33	1.042	*	130/127	0.951	33	1.04	*	131/127	0.92	33	1.049	*	129/128	1.253	33	1.077	*	130/128	1.238
920	gi|53127516	hypothetical protein RCJMB04_2m2 [Gallus gallus]	863	61973	34	22	6	5	15	6.19	0.36	Quantitation summary for protein	129/126	0.963	22	[1.068]		130/126	1.424	22	[1.104]		131/126	1.504	22	1.055	*	129/127	1.036	22	[1.062]		130/127	1.543	22	[1.110]		131/127	1.633	22	[1.065]		129/128	1.023	21	1.045	*	130/128	1.501
921	gi|363729033	PREDICTED: LOW QUALITY PROTEIN: E3 SUMO-protein ligase RanBP2 [Gallus gallus]	862	398091	40	38	20	18	8	5.73	0.18	Quantitation summary for protein	129/126	1.014	38	[1.030]		130/126	0.942	38	[1.042]		131/126	0.854	38	[1.055]		129/127	1.121	38	1.042	*	130/127	1.062	37	1.03	*	131/127	0.968	37	1.035	*	129/128	1.007	38	1.024		130/128	0.93
922	gi|363740105	PREDICTED: protein NipSnap homolog 1 [Gallus gallus]	862	37089	50	37	11	10	38.1	9.43	2.93	Quantitation summary for protein	129/126	0.751	39	1.044	*	130/126	1.072	39	1.04	*	131/126	1.524	39	1.064	*	129/127	0.588	39	1.068	*	130/127	0.845	39	1.03	*	131/127	1.205	39	1.047	*	129/128	0.633	39	1.043	*	130/128	0.898
923	gi|53127668	hypothetical protein RCJMB04_2o15 [Gallus gallus]	861	76418	28	24	6	6	14.1	5.82	0.59	Quantitation summary for protein	129/126	1.82	27	1.076	*	130/126	1.399	27	[1.157]		131/126	1.308	27	[1.297]		129/127	1.914	27	1.145	*	130/127	1.481	27	1.081	*	131/127	1.388	27	[1.209]		129/128	1.283	27	1.034	*	130/128	0.979
924	gi|53126716	hypothetical protein RCJMB04_1g3 [Gallus gallus]	861	38079	33	30	8	8	26.7	5.6	2.49	Quantitation summary for protein	129/126	1.023	32	1.095		130/126	1.326	32	[1.159]		131/126	1.57	32	[1.186]		129/127	0.622	32	[1.160]		130/127	0.812	32	[1.102]		131/127	0.964	32	1.104	*	129/128	0.923	31	1.045	*	130/128	1.187
925	gi|46399077	type II alpha-keratin IIC [Gallus gallus]	860	64601	49	40	11	10	17.5	8.29	1	Quantitation summary for protein	129/126	1.264	18	[1.275]		130/126	0.483	18	[1.144]		131/126	0.663	18	1.208	*	129/127	0.975	18	[1.307]		130/127	0.376	18	1.161	*	131/127	0.516	18	[1.179]		129/128	1.557	18	[1.294]		130/128	0.592
926	gi|118097748	PREDICTED: cytochrome P450 2W1 [Gallus gallus]	860	64367	24	21	8	6	20.8	8.93	0.49	Quantitation summary for protein	129/126	1.397	22	1.041	*	130/126	1.292	22	1.058	*	131/126	0.563	22	1.176	*	129/127	1.719	22	1.066	*	130/127	1.6	22	1.063	*	131/127	0.698	22	[1.142]		129/128	1.342	22	1.076	*	130/128	1.233
927	gi|53136022	hypothetical protein RCJMB04_26h2 [Gallus gallus]	859	89340	36	29	14	11	23	6.03	0.78	Quantitation summary for protein	129/126	1.559	32	[1.062]		130/126	1.026	32	1.048	*	131/126	1.116	32	1.102	*	129/127	1.545	32	[1.068]		130/127	1.024	32	1.037	*	131/127	1.115	32	[1.090]		129/128	1.481	32	1.05	*	130/128	0.968
928	gi|17025728	tax-responsive element binding protein 107 [Gallus gallus]	857	47423	42	32	12	10	34.9	10.67	1.74	Quantitation summary for protein	129/126	1.118	35	[1.082]		130/126	0.729	35	[1.103]		131/126	0.749	35	[1.187]		129/127	1.586	34	1.108	*	130/127	0.999	35	1.054		131/127	1.028	35	1.14		129/128	1.064	35	[1.042]		130/128	0.689
929	gi|50756245	PREDICTED: catechol O-methyltransferase isoform 2 [Gallus gallus]	857	35152	33	30	6	4	21.8	6.21	0.88	Quantitation summary for protein	129/126	1.103	30	[1.032]		130/126	1.199	30	1.035	*	131/126	0.675	30	[1.076]		129/127	1.126	30	1.037	*	130/127	1.232	30	[1.041]		131/127	0.695	30	[1.074]		129/128	1.155	30	1.042	*	130/128	1.246
930	gi|2655422	CDC37 [Gallus gallus]	856	54514	40	32	11	8	33.6	5.24	1.27	Quantitation summary for protein	129/126	1.188	13	1.064	*	130/126	1.003	13	[1.220]		131/126	1.131	13	[1.491]		129/127	1.276	13	1.126	*	130/127	1.085	13	[1.097]		131/127	1.226	13	1.336	*	129/128	1.135	12	1.037	*	130/128	0.954
931	gi|222788	alpha N-catenin [Gallus gallus]	856	117812	23	20	7	4	8.4	5.96	0.28	Quantitation summary for protein	129/126	---	0	---		130/126	---	0	---		131/126	---	0	---		129/127	---	0	---		130/127	---	0	---		131/127	---	0	---		129/128	---	0	---		130/128	---
932	gi|363737883	PREDICTED: dnaJ homolog subfamily A member 4 [Gallus gallus]	855	59413	26	24	8	7	20.5	7.9	0.71	Quantitation summary for protein	129/126	0.971	25	1.037	*	130/126	1.018	24	1.033	*	131/126	1.151	24	1.067	*	129/127	0.976	25	1.043	*	130/127	1.081	25	1.05	*	131/127	1.303	25	[1.080]		129/128	1.032	25	1.037	*	130/128	1.127
933	gi|363733864	PREDICTED: pentatricopeptide repeat-containing protein 3, mitochondrial [Gallus gallus]	854	87609	37	26	10	10	16.4	5.65	0.61	Quantitation summary for protein	129/126	1.002	37	[1.035]		130/126	1.059	37	[1.037]		131/126	1.02	37	1.053	*	129/127	0.809	37	[1.044]		130/127	0.861	37	[1.022]		131/127	0.831	37	1.042	*	129/128	0.913	37	[1.041]		130/128	0.959
934	gi|363747226	PREDICTED: LOW QUALITY PROTEIN: fumarylacetoacetate hydrolase domain-containing protein 2 [Gallus gallus]	850	35714	30	25	9	7	32.9	6.33	1.22	Quantitation summary for protein	129/126	1.037	26	1.047	*	130/126	0.993	26	1.082		131/126	1.147	26	1.089	*	129/127	0.914	26	1.043	*	130/127	0.882	26	1.07	*	131/127	1.114	25	1.062	*	129/128	0.951	26	1.05	*	130/128	0.905
935	gi|90265667	BASH/BLNK N-terminal associated protein 1 [Gallus gallus]	850	27956	24	21	6	6	19	8.97	1.46	Quantitation summary for protein	129/126	1.235	21	1.091	*	130/126	0.994	21	1.071		131/126	0.575	21	[1.252]		129/127	1.489	21	[1.083]		130/127	1.196	20	1.058	*	131/127	0.7	21	[1.244]		129/128	1.28	20	1.041	*	130/128	1.034
936	gi|363727903	PREDICTED: eukaryotic translation initiation factor 3 subunit D [Gallus gallus]	846	74399	42	32	14	11	32.8	6.07	1.18	Quantitation summary for protein	129/126	1.185	38	[1.055]		130/126	1.082	38	[1.121]		131/126	1.052	38	1.22		129/127	1.232	38	1.083	*	130/127	1.132	38	[1.087]		131/127	1.103	38	1.168	*	129/128	1.19	38	1.042	*	130/128	1.079
937	gi|60098401	hypothetical protein RCJMB04_1l3 [Gallus gallus]	846	32517	33	30	12	11	53.1	3.8	2.9	Quantitation summary for protein	129/126	0.927	30	[1.097]		130/126	0.887	30	1.206	*	131/126	0.871	30	[1.335]		129/127	1.076	30	1.149	*	130/127	1.036	30	[1.127]		131/127	1.02	30	[1.259]		129/128	0.913	30	1.052	*	130/128	0.868
938	gi|363738693	PREDICTED: cAMP-dependent protein kinase type II-alpha regulatory subunit-like [Gallus gallus]	843	50971	28	27	10	9	26.2	4.8	0.99	Quantitation summary for protein	129/126	1.15	22	1.06	*	130/126	0.87	22	1.062	*	131/126	1.041	22	[1.188]		129/127	1.199	22	1.098	*	130/127	0.913	22	[1.082]		131/127	1.096	22	[1.187]		129/128	0.99	22	1.04		130/128	0.744
939	gi|118094026	PREDICTED: 3-keto-steroid reductase isoform 2 [Gallus gallus]	841	42086	29	27	9	8	35.8	7.62	1.3	Quantitation summary for protein	129/126	1.443	28	[1.083]		130/126	1.348	28	[1.083]		131/126	0.787	27	1.15	*	129/127	1.365	27	1.051	*	130/127	1.282	28	[1.084]		131/127	0.747	27	1.164	*	129/128	1.49	28	[1.070]		130/128	1.383
940	gi|363745076	PREDICTED: deleted in malignant brain tumors 1 protein-like [Gallus gallus]	840	67001	39	32	10	7	21.2	5.05	0.69	Quantitation summary for protein	129/126	2.964	2	1.521		130/126	0.647	2	1.53		131/126	0.632	2	2.159		129/127	4.431	2	2.304		130/127	0.974	2	1.01		131/127	0.953	2	1.424		129/128	2.569	2	1.667		130/128	0.557
941	gi|50748430	PREDICTED: proteasome subunit alpha type-6 [Gallus gallus]	840	32206	33	28	7	7	29.7	6.13	1.42	Quantitation summary for protein	129/126	0.915	31	1.068	*	130/126	1.184	31	[1.081]		131/126	1.785	31	[1.137]		129/127	0.746	31	1.115	*	130/127	0.972	31	1.057	*	131/127	1.469	31	[1.098]		129/128	1.066	31	1.043	*	130/128	1.371
942	gi|363735157	PREDICTED: peroxisomal N(1)-acetyl-spermine/spermidine oxidase-like [Gallus gallus]	840	57838	37	33	10	9	25.3	5.11	0.74	Quantitation summary for protein	129/126	1.092	34	1.035	*	130/126	1.208	34	[1.079]		131/126	1.37	34	[1.103]		129/127	0.827	34	[1.058]		130/127	0.921	34	[1.039]		131/127	1.047	34	[1.063]		129/128	0.976	31	1.031	*	130/128	1.065
943	gi|53136764	hypothetical protein RCJMB04_33i8 [Gallus gallus]	839	43552	47	41	14	13	39.6	8.71	2.73	Quantitation summary for protein	129/126	0.967	44	[1.054]		130/126	0.948	44	1.053	*	131/126	0.892	44	[1.099]		129/127	0.895	44	[1.088]		130/127	0.884	44	[1.038]		131/127	0.833	44	[1.103]		129/128	1.03	44	[1.029]		130/128	1.004
944	gi|63231	cl. 453 fatty acid or lipid binding protein [Gallus gallus]	839	18011	42	39	10	10	63.6	5.61	12.2	Quantitation summary for protein	129/126	0.803	35	1.073	*	130/126	0.628	35	[1.153]		131/126	0.813	35	[1.308]		129/127	0.897	35	1.099	*	130/127	0.706	35	1.084	*	131/127	0.916	35	[1.231]		129/128	1.314	35	1.036	*	130/128	1.02
945	gi|53133862	hypothetical protein RCJMB04_21b8 [Gallus gallus]	839	80231	26	22	9	9	17.6	8.62	0.75	Quantitation summary for protein	129/126	1.176	23	[1.091]		130/126	1.239	22	1.052	*	131/126	1.078	23	1.116	*	129/127	1.164	23	[1.109]		130/127	1.232	23	[1.068]		131/127	1.077	23	1.109	*	129/128	1.073	23	1.057	*	130/128	1.12
946	gi|312458511	ADP-ribosyl cyclase CD157 [Gallus gallus]	839	39284	22	21	4	4	12.3	5.39	0.38	Quantitation summary for protein	129/126	1.974	21	[1.120]		130/126	1.682	21	1.056	*	131/126	1.077	21	[1.117]		129/127	2.211	21	[1.167]		130/127	1.897	21	1.037	*	131/127	1.217	21	[1.074]		129/128	2.075	21	1.085	*	130/128	1.757
947	gi|50734100	PREDICTED: valacyclovir hydrolase [Gallus gallus]	836	36620	52	47	14	14	45.6	8.64	3.75	Quantitation summary for protein	129/126	1.017	51	[1.089]		130/126	0.972	51	[1.171]		131/126	1.062	51	[1.275]		129/127	0.93	51	[1.072]		130/127	0.895	51	1.098	*	131/127	0.981	51	[1.188]		129/128	0.879	51	1.046	*	130/128	0.835
948	gi|53133806	hypothetical protein RCJMB04_20i16 [Gallus gallus]	836	76391	40	35	17	15	25.8	5.99	0.96	Quantitation summary for protein	129/126	1.153	36	[1.048]		130/126	1.041	36	[1.054]		131/126	0.915	36	[1.096]		129/127	1.148	36	[1.067]		130/127	1.044	36	1.035	*	131/127	0.92	36	[1.073]		129/128	1.05	36	1.02	*	130/128	0.942
949	gi|2760608	CNP2 [Gallus gallus]	835	58090	41	36	16	14	33.8	9.15	1.85	Quantitation summary for protein	129/126	0.689	39	[1.046]		130/126	0.526	39	1.087	*	131/126	0.471	39	[1.126]		129/127	1.207	39	[1.081]		130/127	0.929	39	1.04	*	131/127	0.834	39	1.09	*	129/128	0.835	38	1.023	*	130/128	0.643
950	gi|53133762	hypothetical protein RCJMB04_20c5 [Gallus gallus]	835	102113	31	28	14	13	18.5	6.39	0.56	Quantitation summary for protein	129/126	1.043	30	1.027	*	130/126	1.021	29	[1.035]		131/126	0.741	29	1.068	*	129/127	1.31	29	1.034	*	130/127	1.291	29	1.044	*	131/127	0.929	29	1.077	*	129/128	1.095	30	[1.032]		130/128	1.072
951	gi|363728172	PREDICTED: LOW QUALITY PROTEIN: solute carrier organic anion transporter family member 1A2 [Gallus gallus]	834	82551	30	26	8	8	12.4	6.48	0.6	Quantitation summary for protein	129/126	1.413	27	1.057	*	130/126	0.636	27	1.111	*	131/126	0.373	27	1.168	*	129/127	1.755	27	[1.103]		130/127	0.796	27	[1.074]		131/127	0.468	27	1.133	*	129/128	1.227	27	1.043	*	130/128	0.549
952	gi|60098769	hypothetical protein RCJMB04_8c13 [Gallus gallus]	834	36944	28	25	8	7	35	4.13	1.57	Quantitation summary for protein	129/126	0.836	27	1.253	*	130/126	0.802	27	[1.188]		131/126	0.841	27	[1.338]		129/127	0.954	27	[1.294]		130/127	0.922	27	1.114	*	131/127	0.969	27	[1.235]		129/128	0.944	27	1.123	*	130/128	0.9
953	gi|363734430	PREDICTED: EH domain-containing protein 4-like [Gallus gallus]	834	64826	41	33	10	8	18.8	6.55	0.64	Quantitation summary for protein	129/126	0.97	20	1.028	*	130/126	0.989	20	1.032		131/126	1.034	19	1.026	*	129/127	1.064	20	1.057	*	130/127	1.093	20	1.043	*	131/127	1.141	20	1.041	*	129/128	1.083	20	1.023	*	130/128	1.097
954	gi|60098771	hypothetical protein RCJMB04_8i9 [Gallus gallus]	833	27829	44	37	11	11	55.5	5.64	6.64	Quantitation summary for protein	129/126	1.104	40	[1.035]		130/126	0.921	40	1.048	*	131/126	0.758	39	1.091	*	129/127	1.35	40	[1.052]		130/127	1.134	40	1.035	*	131/127	0.934	39	1.069	*	129/128	1.098	40	1.022	*	130/128	0.91
955	gi|363740195	PREDICTED: SEC14-like protein 2 [Gallus gallus]	831	73578	42	38	14	13	26.1	8.72	1.1	Quantitation summary for protein	129/126	1.146	36	1.094	*	130/126	1.017	36	[1.107]		131/126	0.981	36	[1.134]		129/127	0.986	35	[1.172]		130/127	0.88	35	[1.104]		131/127	0.852	35	1.103	*	129/128	1.054	36	[1.046]		130/128	0.93
956	gi|1850772	aminopeptidase H [Gallus gallus]	830	60960	38	33	10	9	24	5.64	1.2	Quantitation summary for protein	129/126	1.198	35	[1.159]		130/126	0.947	35	1.153	*	131/126	0.995	35	1.301		129/127	1.039	35	[1.240]		130/127	0.828	35	1.067	*	131/127	0.871	35	[1.198]		129/128	1.204	35	[1.088]		130/128	0.946
957	gi|53135109	hypothetical protein RCJMB04_24h4 [Gallus gallus]	830	27192	33	25	8	8	52.1	8.31	3.01	Quantitation summary for protein	129/126	1.169	10	1.061	*	130/126	0.943	10	1.059	*	131/126	0.647	10	1.129	*	129/127	1.395	10	1.054	*	130/127	1.133	10	1.079	*	131/127	0.779	10	1.118	*	129/128	1.173	10	1.065	*	130/128	0.941
958	gi|118083110	PREDICTED: glycogen [starch] synthase, liver isoform 3 [Gallus gallus]	830	89990	49	40	19	14	30.1	6.02	1.12	Quantitation summary for protein	129/126	0.739	47	[1.050]		130/126	1.03	47	1.076	*	131/126	0.713	47	1.108	*	129/127	0.648	47	[1.078]		130/127	0.91	47	[1.068]		131/127	0.631	47	1.107	*	129/128	0.767	47	1.034	*	130/128	1.062
959	gi|226874900	proteasome subunit alpha type-2 [Gallus gallus]	829	29455	29	23	11	7	47	6.97	2.62	Quantitation summary for protein	129/126	1.028	26	1.061	*	130/126	0.811	26	1.123	*	131/126	0.954	26	1.178		129/127	1.167	26	1.11	*	130/127	0.926	26	1.078	*	131/127	1.092	26	1.13	*	129/128	1.134	26	1.058	*	130/128	0.888
960	gi|23821300	hexokinase1 [Gallus gallus]	829	118742	30	29	13	12	14.1	6.32	0.42	Quantitation summary for protein	129/126	0.755	3	1.182		130/126	0.933	3	1.044		131/126	0.568	3	1.256	*	129/127	0.694	3	1.278		130/127	0.864	3	1.111		131/127	0.527	3	1.355		129/128	0.628	3	1.168	*	130/128	0.772
961	gi|50745986	PREDICTED: prefoldin subunit 3 [Gallus gallus]	828	27640	39	35	12	10	50.5	6.01	3.92	Quantitation summary for protein	129/126	0.98	36	1.028	*	130/126	0.933	36	[1.083]		131/126	0.935	36	[1.154]		129/127	0.948	36	[1.052]		130/127	0.909	36	[1.057]		131/127	0.913	36	1.124	*	129/128	1.131	36	1.021	*	130/128	1.07
962	gi|5163126	chromatin assembly factor 1 p48 subunit [Gallus gallus]	827	53362	34	25	10	9	25.6	4.74	0.93	Quantitation summary for protein	129/126	1.147	18	[1.080]		130/126	0.792	18	1.068	*	131/126	0.618	18	1.121	*	129/127	1.339	18	[1.129]		130/127	0.93	18	[1.084]		131/127	0.728	18	1.094	*	129/128	1.122	18	1.029	*	130/128	0.769
963	gi|118098520	PREDICTED: diablo homolog, mitochondrial [Gallus gallus]	827	28889	25	23	10	8	41.2	6.19	1.98	Quantitation summary for protein	129/126	0.738	22	1.061	*	130/126	0.874	23	[1.062]		131/126	0.972	23	1.073		129/127	0.623	23	1.107	*	130/127	0.745	23	[1.058]		131/127	0.831	23	1.065	*	129/128	0.812	23	1.046	*	130/128	0.958
964	gi|46519238	complement C3 precursor [Gallus gallus]	824	11160	40	30	6	4	62.2	6.54	7.54	Quantitation summary for protein	129/126	1.21	10	1.028	*	130/126	1.123	10	1.053	*	131/126	1.561	10	1.07	*	129/127	1.274	10	1.042	*	130/127	1.19	10	1.067	*	131/127	1.659	10	1.083	*	129/128	1.156	10	1.025	*	130/128	1.066
965	gi|363731161	PREDICTED: protein FAM49B-like [Gallus gallus]	823	42080	32	29	9	9	33	5.76	1.13	Quantitation summary for protein	129/126	0.933	24	1.05	*	130/126	0.815	24	[1.076]		131/126	0.728	24	[1.139]		129/127	1.329	24	1.037	*	130/127	1.168	24	1.051	*	131/127	1.051	22	1.062	*	129/128	0.854	24	1.042	*	130/128	0.741
966	gi|995778	cThy28kD [Gallus gallus]	822	35396	48	36	12	10	50	8.32	3.58	Quantitation summary for protein	129/126	0.77	45	[1.140]		130/126	0.98	45	[1.124]		131/126	0.934	45	[1.230]		129/127	0.893	45	[1.191]		130/127	1.144	45	1.092	*	131/127	1.092	45	[1.156]		129/128	0.73	45	1.083	*	130/128	0.923
967	gi|60098701	hypothetical protein RCJMB04_6f4 [Gallus gallus]	819	180080	25	20	8	6	6.8	7.7	0.2	Quantitation summary for protein	129/126	1.137	22	1.099	*	130/126	0.981	22	[1.138]		131/126	1.024	22	[1.196]		129/127	1.352	22	[1.150]		130/127	1.185	21	1.098	*	131/127	1.229	22	[1.124]		129/128	1.08	21	1.06	*	130/128	0.932
968	gi|3184510	GTPase cRac1A [Gallus gallus]	819	25960	28	26	7	6	30.7	8.77	1.97	Quantitation summary for protein	129/126	0.841	12	[1.040]		130/126	1.237	12	1.075	*	131/126	1.067	12	[1.185]		129/127	0.93	12	1.133		130/127	1.376	12	1.054	*	131/127	1.19	12	1.078	*	129/128	0.96	12	1.041	*	130/128	1.402
969	gi|68159406	20-hydroxysteroid dehydrogenase [Gallus gallus]	816	35791	38	29	11	9	47.1	8.5	2.46	Quantitation summary for protein	129/126	1.126	32	1.108	*	130/126	0.933	30	[1.283]		131/126	1.163	32	[1.380]		129/127	0.956	32	1.133		130/127	0.793	30	[1.240]		131/127	0.996	32	[1.310]		129/128	1.108	32	[1.133]		130/128	0.906
970	gi|77022044	NK-lysin [Gallus gallus]	816	18085	33	27	4	4	51.4	5.87	2.93	Quantitation summary for protein	129/126	0.302	31	[1.192]		130/126	0.526	31	[1.145]		131/126	0.369	31	1.225	*	129/127	0.695	30	1.085	*	130/127	1.129	31	1.073	*	131/127	0.793	31	1.135	*	129/128	0.274	31	[1.205]		130/128	0.474
971	gi|57157215	eIF4G-related protein NAT1 [Gallus gallus]	813	114456	47	37	19	15	25.2	6.57	0.76	Quantitation summary for protein	129/126	1.134	40	1.043	*	130/126	0.883	40	[1.064]		131/126	0.768	40	[1.126]		129/127	1.279	40	1.075	*	130/127	1.002	40	1.043		131/127	0.873	40	1.106	*	129/128	1.203	40	[1.027]		130/128	0.93
972	gi|50728374	PREDICTED: 40S ribosomal protein S16 [Gallus gallus]	812	20413	51	41	12	7	61.6	10.21	7.44	Quantitation summary for protein	129/126	1.211	46	1.095	*	130/126	0.935	46	[1.106]		131/126	0.928	46	[1.188]		129/127	1.088	46	[1.124]		130/127	0.846	46	1.063	*	131/127	0.842	46	[1.133]		129/128	1.234	46	1.068	*	130/128	0.946
973	gi|60098993	hypothetical protein RCJMB04_18g2 [Gallus gallus]	811	100932	29	28	12	11	15.4	6.4	0.47	Quantitation summary for protein	129/126	0.971	2	1.112		130/126	1.003	2	1.045		131/126	0.933	2	1.033		129/127	1.183	2	1.125		130/127	1.231	2	1.033		131/127	1.148	2	1.045		129/128	0.858	2	1.1		130/128	0.881
974	gi|363727331	PREDICTED: golgin subfamily B member 1 [Gallus gallus]	810	430606	42	29	22	13	6.1	4.84	0.12	Quantitation summary for protein	129/126	1.383	31	[1.067]		130/126	0.96	30	1.045	*	131/126	0.664	31	1.087	*	129/127	1.755	31	[1.082]		130/127	1.22	30	1.033	*	131/127	0.85	31	[1.075]		129/128	1.356	31	1.034	*	130/128	0.919
975	gi|53134209	hypothetical protein RCJMB04_22n3 [Gallus gallus]	810	38172	43	37	14	12	37.9	5.63	1.95	Quantitation summary for protein	129/126	1.224	34	[1.092]		130/126	0.7	34	[1.108]		131/126	0.56	34	[1.156]		129/127	1.486	34	[1.159]		130/127	0.855	34	1.045	*	131/127	0.686	34	1.098	*	129/128	1.198	31	1.015	*	130/128	0.685
976	gi|53136696	hypothetical protein RCJMB04_32j5 [Gallus gallus]	808	37357	33	25	10	8	31	4.73	2.01	Quantitation summary for protein	129/126	1.027	30	1.083		130/126	1.059	30	[1.058]		131/126	1.078	30	1.116	*	129/127	0.911	30	1.117	*	130/127	0.946	30	1.033	*	131/127	0.965	30	1.086	*	129/128	1.161	30	1.046	*	130/128	1.189
977	gi|44968046	ribosomal protein L18 [Gallus gallus]	807	23020	26	17	8	5	42.2	11.84	2.9	Quantitation summary for protein	129/126	1.254	21	1.165	*	130/126	0.855	21	[1.236]		131/126	0.974	21	[1.336]		129/127	1.507	21	1.285	*	130/127	1.034	21	1.129		131/127	1.181	21	1.213	*	129/128	1.597	21	1.12	*	130/128	1.082
978	gi|363732465	PREDICTED: cytochrome P450 2K1-like [Gallus gallus]	806	64133	36	34	10	9	25.2	9.31	0.82	Quantitation summary for protein	129/126	1.199	22	1.035	*	130/126	1.354	23	1.051	*	131/126	1.09	23	1.065	*	129/127	1.247	23	1.067	*	130/127	1.421	23	1.08	*	131/127	1.146	23	1.058	*	129/128	0.985	23	1.03	*	130/128	1.108
979	gi|53133322	hypothetical protein RCJMB04_15h2 [Gallus gallus]	805	53612	25	24	5	5	15.6	6.9	0.43	Quantitation summary for protein	129/126	1.122	25	[1.043]		130/126	0.943	25	1.04	*	131/126	1.148	25	1.055	*	129/127	1.147	25	[1.043]		130/127	0.971	25	1.03	*	131/127	1.184	25	1.035	*	129/128	1.172	24	1.037	*	130/128	0.972
980	gi|99028876	ADP-ribosylation factor GTPase activating protein 2 [Gallus gallus]	805	66148	38	36	12	11	25.3	7.1	0.79	Quantitation summary for protein	129/126	0.993	38	1.042		130/126	0.944	38	1.043	*	131/126	1.026	38	[1.086]		129/127	1.127	38	1.054	*	130/127	1.079	38	[1.031]		131/127	1.175	38	[1.063]		129/128	1.046	38	[1.034]		130/128	0.988
981	gi|3435272	caspase-6 [Gallus gallus]	803	40239	41	34	5	5	17.8	6.83	0.74	Quantitation summary for protein	129/126	0.972	40	[1.037]		130/126	0.861	40	[1.026]		131/126	0.86	40	[1.039]		129/127	0.986	40	[1.038]		130/127	0.879	40	[1.024]		131/127	0.88	40	1.029	*	129/128	1.104	40	[1.043]		130/128	0.971
982	gi|118099097	PREDICTED: dipeptidyl peptidase 2 [Gallus gallus]	801	58921	41	38	10	9	20.6	5.82	0.92	Quantitation summary for protein	129/126	0.941	39	[1.043]		130/126	1.003	39	[1.049]		131/126	1.143	39	[1.078]		129/127	0.891	39	[1.065]		130/127	0.957	39	1.036	*	131/127	1.094	39	[1.068]		129/128	0.859	39	[1.035]		130/128	0.911
983	gi|53127696	hypothetical protein RCJMB04_2p17 [Gallus gallus]	799	16516	28	23	3	2	33.9	11.01	1.54	Quantitation summary for protein	129/126	1.179	27	1.062	*	130/126	1.022	27	1.053	*	131/126	1.065	27	1.077	*	129/127	1.02	27	1.059		130/127	0.89	27	1.063	*	131/127	0.93	27	1.06	*	129/128	1.108	26	1.05	*	130/128	0.953
984	gi|53130830	hypothetical protein RCJMB04_10e23 [Gallus gallus]	798	31659	49	35	12	10	47.3	7.74	6.37	Quantitation summary for protein	129/126	1.12	40	1.045	*	130/126	0.781	40	[1.082]		131/126	0.852	40	[1.140]		129/127	1.287	40	1.076	*	130/127	0.904	40	1.051	*	131/127	0.988	40	[1.105]		129/128	1.067	40	1.033	*	130/128	0.739
985	gi|53136456	hypothetical protein RCJMB04_29e19 [Gallus gallus]	797	51226	40	38	11	10	33.5	4.51	1.4	Quantitation summary for protein	129/126	1.059	37	1.05	*	130/126	0.797	37	[1.072]		131/126	0.634	37	[1.139]		129/127	1.02	37	[1.041]		130/127	0.773	37	1.066	*	131/127	0.616	37	[1.133]		129/128	1.109	37	1.048	*	130/128	0.829
986	gi|363731587	PREDICTED: heterogeneous nuclear ribonucleoprotein U [Gallus gallus]	797	88996	56	34	18	15	23.2	9.43	1.56	Quantitation summary for protein	129/126	1.029	44	1.035	*	130/126	0.945	45	[1.092]		131/126	0.828	45	[1.158]		129/127	1.331	45	1.058	*	130/127	1.221	45	[1.084]		131/127	1.072	45	[1.141]		129/128	1.142	45	1.03	*	130/128	1.034
987	gi|126659	RecName: Full=Protein MRP-126	794	16691	30	26	4	4	37	6.44	4.29	Quantitation summary for protein	129/126	2.099	30	1.098	*	130/126	1.219	30	1.075	*	131/126	1.993	30	1.178	*	129/127	1.839	30	[1.113]		130/127	1.075	30	1.079	*	131/127	1.761	30	[1.182]		129/128	1.305	30	[1.060]		130/128	0.753
988	gi|363741764	PREDICTED: mitochondrial import receptor subunit TOM34 [Gallus gallus]	794	38359	31	27	7	6	28.2	9.05	0.94	Quantitation summary for protein	129/126	1.045	28	1.021	*	130/126	0.914	28	1.032	*	131/126	0.814	28	1.059	*	129/127	1.069	28	1.034	*	130/127	0.941	28	[1.038]		131/127	0.84	28	1.067	*	129/128	1.005	28	1.041		130/128	0.874
989	gi|302488427	Sjogren syndrome antigen B (autoantigen La) isoform 1 [Gallus gallus]	789	61025	38	27	15	10	38.1	8.05	1.31	Quantitation summary for protein	129/126	1.072	32	1.029	*	130/126	0.83	32	[1.091]		131/126	0.84	32	[1.168]		129/127	1.237	32	1.075	*	130/127	0.964	32	1.049	*	131/127	0.978	32	[1.116]		129/128	1.05	32	1.028	*	130/128	0.808
990	gi|53136816	hypothetical protein RCJMB04_34h15 [Gallus gallus]	788	63070	21	15	7	5	15.2	5.18	0.5	Quantitation summary for protein	129/126	1.211	18	1.085	*	130/126	0.913	18	[1.135]		131/126	0.83	18	1.161	*	129/127	1.496	18	1.152	*	130/127	1.135	18	1.103	*	131/127	1.034	18	[1.154]		129/128	1.106	18	1.075	*	130/128	0.828
991	gi|53132176	hypothetical protein RCJMB04_12p22 [Gallus gallus]	788	19041	31	26	8	7	46.8	9.57	3.32	Quantitation summary for protein	129/126	0.677	26	1.062	*	130/126	0.984	26	[1.166]		131/126	0.933	26	[1.353]		129/127	0.84	26	[1.084]		130/127	1.23	26	[1.128]		131/127	1.168	26	[1.316]		129/128	0.655	26	[1.038]		130/128	0.947
992	gi|50754287	PREDICTED: ras-related protein Rab-43 [Gallus gallus]	788	27412	32	26	7	5	31.2	5.23	1.23	Quantitation summary for protein	129/126	1.286	19	[1.034]		130/126	0.869	19	1.026	*	131/126	0.563	19	1.064	*	129/127	1.663	19	1.048	*	130/127	1.132	19	1.025	*	131/127	0.735	19	1.059	*	129/128	1.261	19	[1.025]		130/128	0.847
993	gi|53136380	hypothetical protein RCJMB04_28a17 [Gallus gallus]	785	60188	30	22	9	5	24.1	6.02	0.61	Quantitation summary for protein	129/126	0.895	25	1.067	*	130/126	1.153	25	1.049	*	131/126	1.091	25	1.099	*	129/127	0.901	25	[1.083]		130/127	1.17	25	1.037	*	131/127	1.109	25	[1.079]		129/128	0.893	25	1.053	*	130/128	1.143
994	gi|53126936	hypothetical protein RCJMB04_1h23 [Gallus gallus]	783	58637	41	34	16	14	40.6	9.57	2.15	Quantitation summary for protein	129/126	0.996	41	[1.050]		130/126	0.988	41	[1.068]		131/126	0.964	41	[1.138]		129/127	1.036	41	[1.061]		130/127	1.034	41	[1.055]		131/127	1.011	41	[1.128]		129/128	1.007	41	1.031		130/128	0.992
995	gi|118085514	PREDICTED: 1-phosphatidylinositol-4,5-bisphosphate phosphodiesterase delta-1 [Gallus gallus]	781	107426	41	35	11	10	16.4	6.3	0.52	Quantitation summary for protein	129/126	0.886	39	[1.047]		130/126	0.782	39	1.029	*	131/126	0.863	39	[1.060]		129/127	1.08	39	[1.049]		130/127	0.959	39	1.023	*	131/127	1.061	39	[1.054]		129/128	0.994	39	1.033		130/128	0.871
996	gi|363736352	PREDICTED: LOW QUALITY PROTEIN: 14 kDa phosphohistidine phosphatase [Gallus gallus]	781	16615	36	35	5	5	43.5	7.77	2.04	Quantitation summary for protein	129/126	0.996	36	1.019		130/126	0.871	36	1.025	*	131/126	0.966	36	[1.037]		129/127	1.114	36	1.019	*	130/127	0.981	36	1.021	*	131/127	1.09	36	1.028	*	129/128	1.075	36	1.019	*	130/128	0.928
997	gi|291191927	melanoma differentiation-associated protein 5 [Gallus gallus]	781	135918	31	25	10	5	11.8	5.96	0.15	Quantitation summary for protein	129/126	0.586	26	1.071	*	130/126	0.549	26	[1.094]		131/126	0.552	26	[1.133]		129/127	1.207	26	[1.062]		130/127	1.138	26	1.045	*	131/127	1.146	26	1.065	*	129/128	0.934	26	1.043	*	130/128	0.869
998	gi|50760631	PREDICTED: glycylpeptide N-tetradecanoyltransferase 1 [Gallus gallus]	780	67255	43	33	17	13	37.4	8.72	1.6	Quantitation summary for protein	129/126	1.052	20	1.047	*	130/126	1.023	20	[1.106]		131/126	1.153	20	[1.181]		129/127	1.005	20	1.049		130/127	0.984	20	[1.049]		131/127	1.111	20	[1.124]		129/128	1.193	20	1.042	*	130/128	1.153
999	gi|63793	stathmin [Gallus gallus]	779	22572	24	22	5	5	33.8	6.18	1.64	Quantitation summary for protein	129/126	1	23	1.034		130/126	1.09	23	1.06	*	131/126	1.171	23	1.068	*	129/127	0.903	23	1.056	*	130/127	0.991	23	[1.069]		131/127	1.067	23	1.052	*	129/128	1.224	23	1.047	*	130/128	1.325
1000	gi|363744767	PREDICTED: 40S ribosomal protein S23 [Gallus gallus]	778	20781	28	26	8	6	37.8	10.5	4.21	Quantitation summary for protein	129/126	1.137	26	1.036	*	130/126	0.889	26	[1.065]		131/126	0.912	26	[1.094]		129/127	1.061	26	1.056	*	130/127	0.836	26	1.05	*	131/127	0.859	26	[1.076]		129/128	1.217	26	1.023	*	130/128	0.945
1001	gi|311771659	cytochrome c oxidase subunit 7A2, mitochondrial [Gallus gallus]	777	11194	24	20	3	3	30.1	10.16	4	Quantitation summary for protein	129/126	0.766	22	1.079	*	130/126	1.045	22	[1.093]		131/126	1.398	22	[1.241]		129/127	0.683	22	[1.078]		130/127	0.938	22	1.083	*	131/127	1.257	22	[1.237]		129/128	0.937	22	1.039	*	130/128	1.27
1002	gi|118103338	PREDICTED: epidermal growth factor receptor pathway substrate 15-like 1 [Gallus gallus]	775	114854	35	35	12	12	19.4	5.02	0.44	Quantitation summary for protein	129/126	0.953	35	[1.031]		130/126	0.903	35	1.046	*	131/126	1.069	35	[1.151]		129/127	1.05	35	1.034	*	130/127	1.003	35	1.028		131/127	1.189	35	[1.131]		129/128	1.01	34	1.02	*	130/128	0.949
1003	gi|116733932	prestin [Gallus gallus]	775	92630	31	26	8	7	15.6	8.69	0.47	Quantitation summary for protein	129/126	1.053	26	1.064	*	130/126	1.128	26	1.055	*	131/126	0.856	26	1.104	*	129/127	1.266	26	[1.072]		130/127	1.366	26	[1.061]		131/127	1.039	26	1.094	*	129/128	1.084	26	1.06	*	130/128	1.154
1004	gi|50752381	PREDICTED: alpha-2-HS-glycoprotein [Gallus gallus]	774	41298	36	36	5	5	18.9	5.77	1	Quantitation summary for protein	129/126	0.52	36	1.067	*	130/126	0.638	36	1.068	*	131/126	0.54	35	1.097	*	129/127	0.523	36	[1.113]		130/127	0.646	36	1.051	*	131/127	0.517	36	[1.082]		129/128	0.52	36	1.069	*	130/128	0.633
1005	gi|50740506	PREDICTED: uncharacterized protein LOC421428 [Gallus gallus]	773	25237	36	35	8	7	46.7	6.1	4.05	Quantitation summary for protein	129/126	1.081	36	1.057	*	130/126	0.952	36	1.065	*	131/126	1.186	36	[1.122]		129/127	0.977	36	1.074		130/127	0.865	36	1.051	*	131/127	1.081	36	[1.095]		129/128	1.161	36	[1.049]		130/128	1.015
1006	gi|118082712	PREDICTED: mitochondrial import receptor subunit TOM22 homolog [Gallus gallus]	772	26787	18	18	3	3	21	4.69	1.02	Quantitation summary for protein	129/126	1.003	18	1.044		130/126	1.136	18	1.05	*	131/126	1.13	17	1.063	*	129/127	0.858	18	1.067	*	130/127	1	17	1.05		131/127	0.956	18	1.068	*	129/128	0.997	18	1.053		130/128	1.123
1007	gi|755484	cell division cycle control protein 37 [Gallus gallus]	771	35532	32	29	7	6	32.9	5.65	1.23	Quantitation summary for protein	129/126	1.191	5	1.029	*	130/126	0.858	5	1.045	*	131/126	0.797	5	1.018	*	129/127	1.172	5	1.033	*	130/127	0.85	5	1.018	*	131/127	0.792	5	1.043	*	129/128	1.229	5	1.038	*	130/128	0.88
1008	gi|53132618	hypothetical protein RCJMB04_13l2 [Gallus gallus]	770	56491	38	31	14	12	25.9	5.81	1.34	Quantitation summary for protein	129/126	0.931	34	[1.062]		130/126	0.935	34	[1.101]		131/126	0.792	34	[1.177]		129/127	1.017	34	[1.053]		130/127	1.028	34	[1.069]		131/127	0.873	34	[1.144]		129/128	1.017	33	1.025	*	130/128	1.013
1009	gi|53128571	hypothetical protein RCJMB04_4p4 [Gallus gallus]	770	135707	37	34	16	14	14.9	5.94	0.46	Quantitation summary for protein	129/126	0.997	34	1.03		130/126	0.958	34	[1.047]		131/126	0.712	34	[1.103]		129/127	1.297	34	1.042	*	130/127	1.255	34	1.048	*	131/127	0.934	34	[1.083]		129/128	0.995	34	1.019		130/128	0.95
1010	gi|118096883	PREDICTED: coiled-coil-helix-coiled-coil-helix domain-containing protein 6 isoform 1 [Gallus gallus]	770	32775	29	22	10	7	36.5	8.58	1.89	Quantitation summary for protein	129/126	0.726	4	1.262		130/126	0.995	4	1.337		131/126	1.551	3	1.019	*	129/127	0.726	4	1.114	*	130/127	1.002	4	1.275		131/127	1.558	3	1.118	*	129/128	0.734	4	1.237		130/128	1
1011	gi|363738995	PREDICTED: la-related protein 1 [Gallus gallus]	770	117822	59	40	16	12	18.8	8.81	0.59	Quantitation summary for protein	129/126	1.293	46	[1.082]		130/126	0.972	45	[1.069]		131/126	0.894	46	[1.104]		129/127	1.28	46	[1.122]		130/127	0.969	45	1.041	*	131/127	0.893	46	[1.069]		129/128	1.221	46	[1.040]		130/128	0.911
1012	gi|2661436	receptor-associated protein [Gallus gallus]	767	51334	47	38	19	16	44.5	8.61	2.48	Quantitation summary for protein	129/126	1.096	41	[1.044]		130/126	0.903	41	[1.103]		131/126	1.043	41	[1.143]		129/127	1.233	41	[1.101]		130/127	1.023	41	[1.051]		131/127	1.184	41	[1.094]		129/128	1.264	41	[1.037]		130/128	1.034
1013	gi|53133834	hypothetical protein RCJMB04_20m7 [Gallus gallus]	767	55777	30	24	10	7	19.9	6.55	0.78	Quantitation summary for protein	129/126	1.171	27	1.055	*	130/126	0.798	27	[1.123]		131/126	1.118	27	[1.228]		129/127	1.392	27	[1.089]		130/127	0.955	27	[1.082]		131/127	1.341	27	[1.194]		129/128	0.998	26	1.039		130/128	0.676
1014	gi|363745828	PREDICTED: glutaryl-CoA dehydrogenase, mitochondrial-like, partial [Gallus gallus]	766	28223	43	27	11	5	43.8	6.67	3.27	Quantitation summary for protein	129/126	0.982	35	1.128		130/126	0.855	36	1.175	*	131/126	0.869	36	1.206	*	129/127	0.893	36	[1.160]		130/127	0.778	36	[1.132]		131/127	0.792	36	[1.168]		129/128	0.96	36	1.135		130/128	0.825
1015	gi|363738749	PREDICTED: cullin-associated NEDD8-dissociated protein 1 isoform 2 [Gallus gallus]	764	159560	36	29	12	10	9	5.88	0.28	Quantitation summary for protein	129/126	0.97	7	1.049		130/126	1.131	7	1.063	*	131/126	0.832	7	[1.108]		129/127	1.236	7	1.061	*	130/127	1.45	7	1.086	*	131/127	1.069	7	1.088		129/128	1.027	7	1.029		130/128	1.189
1016	gi|118090299	PREDICTED: estrogen sulfotransferase [Gallus gallus]	763	39894	31	25	10	9	41.8	6.27	2.58	Quantitation summary for protein	129/126	1.262	28	[1.113]		130/126	0.932	28	1.072	*	131/126	0.871	28	1.128	*	129/127	1.037	28	[1.105]		130/127	0.771	28	[1.088]		131/127	0.722	28	1.133	*	129/128	0.994	27	1.057		130/128	0.732
1017	gi|363743527	PREDICTED: membrane primary amine oxidase isoform 2 [Gallus gallus]	763	89295	29	23	11	8	21.3	6.07	0.72	Quantitation summary for protein	129/126	1.114	21	[1.092]		130/126	1.122	21	1.099	*	131/126	0.973	21	1.174		129/127	1.138	20	1.126	*	130/127	1.155	20	1.055	*	131/127	1.003	20	1.113		129/128	0.809	23	[1.095]		130/128	0.809
1018	gi|363740228	PREDICTED: glutathione S-transferase theta-1-like isoform 1 [Gallus gallus]	763	32634	31	26	9	8	34.3	6.56	3.71	Quantitation summary for protein	129/126	0.603	26	1.107	*	130/126	0.619	26	1.166	*	131/126	0.982	26	[1.161]		129/127	0.468	26	1.114	*	130/127	0.484	26	1.151	*	131/127	0.769	26	[1.135]		129/128	0.561	26	1.088	*	130/128	0.572
1019	gi|12656073	ubiquitin fusion-degradation 1-like protein [Gallus gallus]	762	39638	42	31	9	8	31.3	6.26	1.42	Quantitation summary for protein	129/126	1.058	37	1.031	*	130/126	1.154	37	1.038	*	131/126	1.363	37	1.037	*	129/127	0.9	37	1.033	*	130/127	0.989	37	1.04		131/127	1.171	37	1.034	*	129/128	1.084	37	1.027	*	130/128	1.175
1020	gi|363733468	PREDICTED: starch-binding domain-containing protein 1 [Gallus gallus]	762	42567	19	17	6	6	17.1	4.59	0.57	Quantitation summary for protein	129/126	0.953	17	1.076	*	130/126	1.053	17	[1.073]		131/126	0.979	16	1.06		129/127	0.863	17	1.058	*	130/127	0.959	17	1.057	*	131/127	0.878	17	1.085	*	129/128	0.925	17	1.06	*	130/128	1.027
1021	gi|118104488	PREDICTED: phospholipase A-2-activating protein [Gallus gallus]	760	99163	44	34	15	11	21.7	5.89	0.63	Quantitation summary for protein	129/126	1.361	36	1.052	*	130/126	1.245	36	[1.055]		131/126	1.008	36	[1.087]		129/127	1.282	35	1.055	*	130/127	1.158	36	1.053	*	131/127	0.94	36	[1.084]		129/128	1.278	36	1.038	*	130/128	1.161
1022	gi|53130002	hypothetical protein RCJMB04_6g9 [Gallus gallus]	760	85148	33	28	10	8	14.1	6.06	0.76	Quantitation summary for protein	129/126	1.148	30	1.047	*	130/126	0.95	30	1.053	*	131/126	0.726	30	1.103	*	129/127	1.062	30	1.051	*	130/127	0.884	30	[1.050]		131/127	0.677	30	1.108	*	129/128	1.288	30	1.032	*	130/128	1.058
1023	gi|363743735	PREDICTED: perilipin-3-like [Gallus gallus]	760	51375	36	28	16	13	43.4	6.03	1.7	Quantitation summary for protein	129/126	0.864	30	1.055	*	130/126	1.108	31	[1.083]		131/126	1.096	31	[1.139]		129/127	0.851	31	[1.078]		130/127	1.098	31	[1.074]		131/127	1.089	31	[1.113]		129/128	0.859	31	[1.055]		130/128	1.094
1024	gi|45239430	annexin I [Gallus gallus]	760	46782	25	24	10	10	29.2	7.05	1.6	Quantitation summary for protein	129/126	1.569	21	1.088	*	130/126	1.063	19	1.05	*	131/126	1.343	21	[1.190]		129/127	2.087	21	1.128	*	130/127	1.334	21	1.074	*	131/127	1.802	21	[1.189]		129/128	1.142	20	1.04	*	130/128	0.719
1025	gi|363740385	PREDICTED: FK506-binding protein 15 [Gallus gallus]	758	156910	31	28	12	10	12	4.88	0.31	Quantitation summary for protein	129/126	0.907	28	[1.078]		130/126	0.897	28	[1.057]		131/126	0.784	28	1.074	*	129/127	0.964	28	[1.083]		130/127	0.96	28	[1.052]		131/127	0.84	28	1.067	*	129/128	1.003	28	1.061		130/128	0.985
1026	gi|53127400	hypothetical protein RCJMB04_2c16 [Gallus gallus]	757	13857	45	45	7	7	53.4	6.56	8.01	Quantitation summary for protein	129/126	1.009	45	1.066		130/126	1.338	45	[1.057]		131/126	1.486	45	1.078	*	129/127	0.777	45	[1.072]		130/127	1.036	45	1.048	*	131/127	1.154	45	[1.084]		129/128	1.112	45	1.049	*	130/128	1.464
1027	gi|356582452	phosphoserine phosphatase [Gallus gallus]	756	29022	26	23	11	10	52.2	6	2.69	Quantitation summary for protein	129/126	1.633	23	[1.065]		130/126	1.03	23	[1.062]		131/126	1.094	23	[1.159]		129/127	1.724	23	[1.082]		130/127	1.095	23	[1.048]		131/127	1.166	23	[1.132]		129/128	1.649	22	1.04	*	130/128	1.16
1028	gi|313661353	rho-associated protein kinase 1 [Gallus gallus]	755	191625	48	42	16	14	12.7	5.66	0.33	Quantitation summary for protein	129/126	1.191	43	[1.029]		130/126	0.995	43	1.026		131/126	0.683	43	1.073	*	129/127	1.306	43	1.037	*	130/127	1.099	43	1.019	*	131/127	0.755	43	[1.056]		129/128	1.069	43	[1.020]		130/128	0.888
1029	gi|363728836	PREDICTED: ribosomal protein S6 kinase alpha-3 [Gallus gallus]	754	92778	33	26	12	12	21.1	6.79	0.57	Quantitation summary for protein	129/126	0.992	15	1.021		130/126	0.895	16	1.044	*	131/126	0.903	16	1.066	*	129/127	1.076	16	1.061	*	130/127	0.95	16	[1.038]		131/127	0.96	16	[1.080]		129/128	1.094	16	1.041	*	130/128	0.953
1030	gi|37787319	nicotinate phosphoribosyltransferase-like protein [Gallus gallus]	754	45295	25	23	7	6	22.3	5.45	0.64	Quantitation summary for protein	129/126	0.977	24	1.054	*	130/126	0.909	24	[1.052]		131/126	0.787	24	[1.146]		129/127	1.037	24	[1.081]		130/127	0.972	24	[1.050]		131/127	0.843	24	1.105	*	129/128	0.903	24	1.041	*	130/128	0.835
1031	gi|118094906	PREDICTED: serine/threonine-protein kinase PAK 2 isoform 2 [Gallus gallus]	753	69253	34	29	11	10	28.8	5.57	0.66	Quantitation summary for protein	129/126	0.95	23	[1.098]		130/126	0.997	22	1.045		131/126	1.076	23	[1.103]		129/127	0.955	22	1.073	*	130/127	1.015	22	1.037		131/127	1.087	21	1.038	*	129/128	1.004	23	[1.057]		130/128	1.046
1032	gi|118092574	PREDICTED: cell division cycle and apoptosis regulator protein 1 [Gallus gallus]	749	157565	45	29	16	12	15	5.63	0.42	Quantitation summary for protein	129/126	0.961	31	[1.044]		130/126	1.088	31	[1.048]		131/126	1.142	31	1.095	*	129/127	1.004	31	[1.063]		130/127	1.144	31	1.033	*	131/127	1.204	31	1.079	*	129/128	0.935	31	1.038	*	130/128	1.051
1033	gi|118095590	PREDICTED: reticulocalbin-2 [Gallus gallus]	747	39814	30	27	6	6	24.1	4.43	0.75	Quantitation summary for protein	129/126	1.248	27	1.039	*	130/126	0.727	27	[1.110]		131/126	0.633	27	[1.213]		129/127	1.623	27	1.088	*	130/127	0.952	27	[1.067]		131/127	0.831	27	[1.157]		129/128	1.226	27	1.04	*	130/128	0.71
1034	gi|17433708	RecName: Full=Cofilin-2; AltName: Full=Cofilin, muscle isoform	747	24493	45	37	9	8	55.4	7.66	3.08	Quantitation summary for protein	129/126	0.844	39	1.087	*	130/126	1.007	39	[1.077]		131/126	1.102	39	[1.113]		129/127	0.776	39	[1.104]		130/127	0.931	39	[1.075]		131/127	1.022	39	[1.100]		129/128	0.961	39	1.048	*	130/128	1.139
1035	gi|53136536	hypothetical protein RCJMB04_30g17 [Gallus gallus]	745	64007	39	32	10	9	19.6	6.09	1.12	Quantitation summary for protein	129/126	0.88	35	1.07	*	130/126	1.245	35	[1.048]		131/126	1.348	35	1.06	*	129/127	0.665	35	[1.091]		130/127	0.947	35	[1.049]		131/127	1.027	35	[1.050]		129/128	0.892	35	1.041	*	130/128	1.254
1036	gi|5805326	ubiquitin carboxyl-terminal hydrolase-6 [Gallus gallus]	745	29907	23	20	5	5	30.4	4.91	1.09	Quantitation summary for protein	129/126	0.94	21	[1.027]		130/126	0.835	21	[1.098]		131/126	0.879	21	[1.181]		129/127	0.904	21	1.056	*	130/127	0.809	21	[1.065]		131/127	0.853	21	[1.145]		129/128	1.121	20	1.026	*	130/128	1.001
1037	gi|53135540	hypothetical protein RCJMB04_25f12 [Gallus gallus]	745	39789	39	31	10	9	27.9	4.99	2.06	Quantitation summary for protein	129/126	1.205	33	[1.102]		130/126	0.989	33	1.117		131/126	1.072	33	1.185	*	129/127	1.226	33	1.165	*	130/127	1.013	33	[1.053]		131/127	1.101	33	[1.146]		129/128	1.216	33	1.036	*	130/128	0.992
1038	gi|363737828	PREDICTED: acidic leucine-rich nuclear phosphoprotein 32 family member A [Gallus gallus]	744	37134	36	30	12	10	37.7	3.94	2.92	Quantitation summary for protein	129/126	0.866	32	1.194	*	130/126	1.023	32	[1.292]		131/126	0.71	32	[1.523]		129/127	0.849	32	1.314	*	130/127	1.01	32	1.147		131/127	0.703	32	[1.328]		129/128	0.903	32	1.093	*	130/128	1.059
1039	gi|118084667	PREDICTED: tripeptidyl-peptidase 2 [Gallus gallus]	743	158414	41	35	16	14	13.9	5.95	0.41	Quantitation summary for protein	129/126	1.311	37	1.034	*	130/126	1.283	37	[1.111]		131/126	1.029	37	1.062	*	129/127	1.116	37	1.033	*	130/127	1.099	37	[1.107]		131/127	0.883	37	1.056	*	129/128	1.247	37	1.025	*	130/128	1.211
1040	gi|113734323	Lanosterol 14alpha-demethylase [Gallus gallus]	743	61670	34	30	10	8	24.4	8.32	0.68	Quantitation summary for protein	129/126	1.091	30	1.029	*	130/126	1.225	30	1.055	*	131/126	1.038	30	[1.161]		129/127	1.115	29	1.029	*	130/127	1.241	30	1.035	*	131/127	1.054	30	1.129	*	129/128	1.046	30	1.022	*	130/128	1.167
1041	gi|50752703	PREDICTED: sorbitol dehydrogenase [Gallus gallus]	743	42872	45	28	11	8	34.1	7.09	2.05	Quantitation summary for protein	129/126	0.858	31	1.068	*	130/126	0.835	32	[1.060]		131/126	0.802	32	1.115	*	129/127	0.91	32	[1.097]		130/127	0.74	32	1.047	*	131/127	0.712	32	1.107	*	129/128	0.817	32	1.062	*	130/128	0.655
1042	gi|53128779	hypothetical protein RCJMB04_5c11 [Gallus gallus]	739	167225	35	28	12	9	11.1	5.63	0.29	Quantitation summary for protein	129/126	1.333	30	1.033	*	130/126	1.017	31	1.041	*	131/126	0.783	31	[1.072]		129/127	1.716	30	[1.061]		130/127	1.318	30	1.046	*	131/127	1.016	30	[1.054]		129/128	1.258	30	[1.039]		130/128	0.953
1043	gi|363729502	PREDICTED: S-formylglutathione hydrolase isoform 1 [Gallus gallus]	737	37037	28	25	14	12	49.6	6.3	2.93	Quantitation summary for protein	129/126	0.959	24	1.11		130/126	1.077	25	1.15	*	131/126	0.915	25	[1.298]		129/127	0.873	25	[1.188]		130/127	0.958	25	[1.133]		131/127	0.815	25	[1.293]		129/128	1.067	24	1.072	*	130/128	1.087
1044	gi|60098383	hypothetical protein RCJMB04_1e1 [Gallus gallus]	735	84122	28	23	11	8	18.4	6.02	0.36	Quantitation summary for protein	129/126	1.087	23	1.022	*	130/126	0.965	24	[1.096]		131/126	0.786	23	1.117	*	129/127	1.28	24	[1.079]		130/127	1.194	24	[1.050]		131/127	0.977	23	1.071		129/128	1.069	23	1.018	*	130/128	0.96
1045	gi|53135337	hypothetical protein RCJMB04_24o2 [Gallus gallus]	734	53436	39	31	10	10	27.8	5.61	1.18	Quantitation summary for protein	129/126	1.396	38	1.165	*	130/126	1.209	38	1.182	*	131/126	1.559	38	[1.296]		129/127	1.377	38	1.238	*	130/127	1.201	38	[1.152]		131/127	1.552	38	1.234	*	129/128	1.696	38	[1.132]		130/128	1.46
1046	gi|118100450	PREDICTED: RNA-binding protein 39 [Gallus gallus]	734	66808	21	16	9	7	18	10.18	0.62	Quantitation summary for protein	129/126	1.245	18	[1.092]		130/126	0.828	18	1.092	*	131/126	1.092	18	1.11	*	129/127	1.428	18	1.124	*	130/127	0.957	18	1.062	*	131/127	1.264	18	1.078	*	129/128	1.409	18	1.101	*	130/128	0.932
1047	gi|363727415	PREDICTED: phytanoyl-CoA dioxygenase, peroxisomal [Gallus gallus]	732	44774	38	34	12	11	30.7	8.43	1.52	Quantitation summary for protein	129/126	2.109	36	1.056	*	130/126	1.113	36	[1.054]		131/126	1.498	36	[1.111]		129/127	1.76	36	1.067	*	130/127	0.935	36	1.036	*	131/127	1.262	36	1.093	*	129/128	1.471	36	[1.031]		130/128	0.771
1048	gi|380876896	RecName: Full=Ethylmalonyl-CoA decarboxylase; AltName: Full=Enoyl-CoA hydratase domain-containing protein 1; AltName: Full=Methylmalonyl-CoA decarboxylase; Short=MMCD	732	36161	21	20	8	7	27.2	9.23	1.4	Quantitation summary for protein	129/126	1.016	20	1.042		130/126	1.108	20	1.118	*	131/126	1.286	20	1.173	*	129/127	0.837	20	1.066	*	130/127	0.92	20	1.094	*	131/127	1.07	20	1.135	*	129/128	1.057	20	1.037	*	130/128	1.146
1049	gi|53132234	hypothetical protein RCJMB04_13a24 [Gallus gallus]	731	50972	37	31	9	9	18.7	8.33	1.26	Quantitation summary for protein	129/126	1.062	33	1.057	*	130/126	1.155	33	[1.104]		131/126	1.437	33	[1.217]		129/127	0.943	33	[1.112]		130/127	1.032	33	1.067	*	131/127	1.287	33	[1.174]		129/128	1.133	33	1.045	*	130/128	1.223
1050	gi|1708877	RecName: Full=Lumican; AltName: Full=Keratan sulfate proteoglycan lumican; Short=KSPG lumican; Flags: Precursor	731	44288	27	23	8	6	25.1	6.07	0.91	Quantitation summary for protein	129/126	0.835	22	1.056	*	130/126	1.206	23	1.083	*	131/126	2.003	23	[1.172]		129/127	0.803	23	1.08	*	130/127	1.16	23	1.072	*	131/127	1.931	23	[1.173]		129/128	0.856	23	1.056	*	130/128	1.22
1051	gi|363736857	PREDICTED: dihydropyrimidine dehydrogenase [NADP+] [Gallus gallus]	728	126724	33	30	14	14	16.2	6.03	0.47	Quantitation summary for protein	129/126	1.276	29	1.037	*	130/126	1.234	30	1.052	*	131/126	1.197	30	1.079	*	129/127	0.908	30	[1.055]		130/127	0.882	30	[1.044]		131/127	0.857	30	1.08	*	129/128	1.129	30	1.036	*	130/128	1.035
1052	gi|50749404	PREDICTED: annexin A7 [Gallus gallus]	727	53942	43	37	15	14	29.4	5.71	1.58	Quantitation summary for protein	129/126	1.135	40	[1.063]		130/126	1.029	40	[1.069]		131/126	1.233	40	[1.139]		129/127	1.004	40	[1.093]		130/127	0.916	40	1.042	*	131/127	1.101	40	[1.098]		129/128	1.152	40	[1.038]		130/128	1.038
1053	gi|50752156	PREDICTED: dnaJ homolog subfamily B member 11 [Gallus gallus]	726	46943	37	25	13	10	25.4	5.93	1.59	Quantitation summary for protein	129/126	1.582	30	1.15	*	130/126	1.107	30	1.21	*	131/126	1.682	30	[1.544]		129/127	1.554	30	1.215	*	130/127	1.094	30	[1.145]		131/127	1.668	30	[1.476]		129/128	1.538	30	1.1	*	130/128	1.069
1054	gi|118091925	PREDICTED: golgin subfamily A member 5 [Gallus gallus]	726	94989	25	21	9	7	13.6	5.72	0.31	Quantitation summary for protein	129/126	1.103	22	1.034	*	130/126	0.968	22	[1.030]		131/126	1.022	22	[1.064]		129/127	1.366	22	[1.073]		130/127	1.207	22	1.041	*	131/127	1.277	22	1.039	*	129/128	1.211	22	[1.038]		130/128	1.056
1055	gi|118094283	PREDICTED: glycogen debranching enzyme [Gallus gallus]	726	194950	49	35	22	18	14.9	6.59	0.44	Quantitation summary for protein	129/126	1.215	44	1.038	*	130/126	0.978	44	1.037	*	131/126	0.842	44	1.059	*	129/127	1.12	44	[1.047]		130/127	0.908	44	1.029	*	131/127	0.784	44	1.05	*	129/128	1.018	44	1.021	*	130/128	0.815
1056	gi|363732695	PREDICTED: xaa-Pro aminopeptidase 2-like [Gallus gallus]	726	78319	34	27	10	8	15.4	5.2	0.57	Quantitation summary for protein	129/126	1.147	33	1.024	*	130/126	1.112	33	1.032	*	131/126	0.758	33	[1.066]		129/127	1.27	33	1.045	*	130/127	1.24	33	1.034	*	131/127	0.847	33	1.051	*	129/128	0.833	33	1.023	*	130/128	0.802
1057	gi|53133852	hypothetical protein RCJMB04_20p3 [Gallus gallus]	726	30744	26	26	5	5	29.3	5.15	1.05	Quantitation summary for protein	129/126	0.995	26	1.047		130/126	0.922	25	1.027	*	131/126	0.78	26	[1.070]		129/127	1.067	26	[1.059]		130/127	0.977	26	1.031	*	131/127	0.845	26	[1.060]		129/128	1.114	26	1.027	*	130/128	1.006
1058	gi|53130754	hypothetical protein RCJMB04_9n22 [Gallus gallus]	725	22375	35	26	8	7	72.1	8.68	3.03	Quantitation summary for protein	129/126	0.915	27	1.062	*	130/126	0.787	25	1.062	*	131/126	0.716	25	1.108	*	129/127	1.122	27	1.057	*	130/127	0.967	25	1.052	*	131/127	0.887	26	1.097	*	129/128	1.05	25	1.045	*	130/128	0.938
1059	gi|53136570	hypothetical protein RCJMB04_31a13 [Gallus gallus]	725	46685	33	32	12	11	34.6	7.6	1.6	Quantitation summary for protein	129/126	0.915	32	[1.066]		130/126	0.846	32	[1.069]		131/126	0.858	32	[1.133]		129/127	1.074	32	[1.098]		130/127	1	32	1.053		131/127	1.017	32	[1.101]		129/128	1.253	32	1.045	*	130/128	1.151
1060	gi|50754507	PREDICTED: 26S proteasome non-ATPase regulatory subunit 6 [Gallus gallus]	725	52021	27	26	8	7	20.6	5.87	0.63	Quantitation summary for protein	129/126	1.299	26	1.046	*	130/126	1.006	26	[1.078]		131/126	0.603	25	[1.079]		129/127	1.505	26	1.08	*	130/127	1.173	26	[1.064]		131/127	0.705	25	[1.057]		129/128	1.155	26	1.035	*	130/128	0.889
1061	gi|50748536	PREDICTED: activator of 90 kDa heat shock protein ATPase homolog 1 isoform 2 [Gallus gallus]	724	45526	25	23	9	9	33.8	5.61	1.01	Quantitation summary for protein	129/126	1.138	24	1.051	*	130/126	0.799	24	1.078	*	131/126	0.824	24	1.161	*	129/127	1.265	24	1.062	*	130/127	0.895	24	1.061	*	131/127	0.925	24	1.126	*	129/128	1.28	24	1.049	*	130/128	0.894
1062	gi|12249117	proliferating cell nuclear antigen [Gallus gallus]	724	32878	29	26	9	7	37	4.6	1.38	Quantitation summary for protein	129/126	0.959	27	1.03	*	130/126	0.891	27	1.035	*	131/126	0.982	27	1.045	*	129/127	1.063	27	1.037	*	130/127	0.994	27	1.04		131/127	1.098	27	1.044	*	129/128	1.161	27	1.056	*	130/128	1.072
1063	gi|53135495	hypothetical protein RCJMB04_25e17 [Gallus gallus]	724	25743	27	21	6	4	27.5	5.33	1.65	Quantitation summary for protein	129/126	0.947	25	[1.043]		130/126	0.932	25	[1.161]		131/126	0.831	25	1.264	*	129/127	0.876	25	1.062	*	130/127	0.868	25	[1.086]		131/127	0.775	25	1.198	*	129/128	1.159	25	1.04	*	130/128	1.133
1064	gi|363746205	PREDICTED: intercellular adhesion molecule 5-like, partial [Gallus gallus]	723	32997	26	19	3	2	11.9	6.61	0.47	Quantitation summary for protein	129/126	0.839	19	[1.058]		130/126	0.654	19	[1.128]		131/126	0.646	19	[1.176]		129/127	1.314	19	[1.098]		130/127	1.031	19	1.069		131/127	1.021	19	1.115		129/128	0.866	19	1.024	*	130/128	0.67
1065	gi|363746086	PREDICTED: apolipoprotein A-I-binding protein, partial [Gallus gallus]	722	14772	30	27	5	5	45.6	7.03	8.79	Quantitation summary for protein	129/126	0.918	29	[1.083]		130/126	0.924	29	[1.094]		131/126	1.006	29	[1.122]		129/127	0.906	29	1.122	*	130/127	0.919	29	1.098	*	131/127	1.003	29	[1.137]		129/128	1.078	29	[1.065]		130/128	1.064
1066	gi|363728854	PREDICTED: uncharacterized protein LOC770637 [Gallus gallus]	721	471955	29	25	15	11	4.9	7.59	0.09	Quantitation summary for protein	129/126	0.935	25	[1.061]		130/126	0.968	25	1.066	*	131/126	0.913	25	[1.152]		129/127	1.234	25	[1.085]		130/127	1.294	24	1.041	*	131/127	1.216	25	[1.125]		129/128	1.039	25	1.044	*	130/128	1.068
1067	gi|53130462	hypothetical protein RCJMB04_7p19 [Gallus gallus]	720	44158	34	31	11	10	33.9	4.98	1.74	Quantitation summary for protein	129/126	1.127	34	[1.049]		130/126	0.812	34	[1.084]		131/126	0.895	34	[1.109]		129/127	1.136	34	[1.092]		130/127	0.824	34	1.05	*	131/127	0.91	34	[1.074]		129/128	1.122	33	1.026	*	130/128	0.804
1068	gi|60099213	hypothetical protein RCJMB04_34k20 [Gallus gallus]	720	32607	36	30	11	10	39.2	8.79	3.71	Quantitation summary for protein	129/126	0.859	17	[1.116]		130/126	0.817	17	[1.204]		131/126	1.009	17	[1.404]		129/127	0.885	17	1.107	*	130/127	0.847	17	[1.205]		131/127	1.049	17	[1.386]		129/128	0.809	17	1.052	*	130/128	0.764
1069	gi|363728789	PREDICTED: 60S ribosomal protein L8 [Gallus gallus]	718	34650	39	32	12	11	48.6	10.96	2.6	Quantitation summary for protein	129/126	1.177	36	[1.211]		130/126	0.993	36	[1.110]		131/126	1.081	36	1.157	*	129/127	1.174	35	[1.250]		130/127	0.998	35	1.063		131/127	1.089	35	1.111	*	129/128	1.219	36	[1.115]		130/128	1.022
1070	gi|127152	RecName: Full=Myosin light chain, embryonic; AltName: Full=L23	717	24616	30	24	9	9	54.1	5.02	3.6	Quantitation summary for protein	129/126	1.207	21	1.062	*	130/126	0.699	21	1.088	*	131/126	0.489	21	1.169	*	129/127	1.645	21	1.099	*	130/127	0.96	21	1.046	*	131/127	0.673	21	[1.126]		129/128	1.138	21	1.036	*	130/128	0.655
1071	gi|50754473	PREDICTED: mitochondrial carnitine/acylcarnitine carrier protein [Gallus gallus]	717	37056	39	29	12	11	37.5	9.51	2.61	Quantitation summary for protein	129/126	0.985	34	1.042	*	130/126	1.118	34	1.098	*	131/126	0.778	34	[1.149]		129/127	1.152	34	1.084	*	130/127	1.317	34	1.073	*	131/127	0.918	34	[1.110]		129/128	0.814	34	1.048	*	130/128	0.918
1072	gi|60099167	hypothetical protein RCJMB04_30n4 [Gallus gallus]	717	41652	38	28	9	7	31.1	5.69	0.84	Quantitation summary for protein	129/126	0.986	32	1.022	*	130/126	0.796	32	[1.039]		131/126	0.859	32	[1.067]		129/127	1.046	32	[1.037]		130/127	0.85	32	1.034	*	131/127	0.92	32	[1.052]		129/128	1.045	32	[1.028]		130/128	0.838
1073	gi|118102948	PREDICTED: proteasome subunit beta type-3 [Gallus gallus]	716	25417	28	27	6	5	37.6	5.28	1.37	Quantitation summary for protein	129/126	1.104	28	1.036	*	130/126	0.997	28	1.113		131/126	1.382	28	[1.207]		129/127	1.114	28	[1.085]		130/127	1.013	28	1.058		131/127	0.862	20	1.066	*	129/128	1.088	28	1.023	*	130/128	0.976
1074	gi|53136600	hypothetical protein RCJMB04_31h10 [Gallus gallus]	714	46164	28	24	9	7	31.6	4.7	1.14	Quantitation summary for protein	129/126	1.021	27	1.053	*	130/126	1.051	27	1.077	*	131/126	1.303	27	[1.132]		129/127	0.975	27	1.091		130/127	1.01	27	1.04		131/127	1.256	27	[1.093]		129/128	1.118	27	1.038	*	130/128	1.144
1075	gi|53130330	hypothetical protein RCJMB04_7b3 [Gallus gallus]	714	45876	24	22	8	7	27.6	6.48	0.74	Quantitation summary for protein	129/126	---	1	---		130/126	---	1	---		131/126	---	1	---		129/127	---	1	---		130/127	---	1	---		131/127	---	1	---		129/128	---	1	---		130/128	---
1076	gi|118093001	PREDICTED: glycerol-3-phosphate acyltransferase 1, mitochondrial [Gallus gallus]	714	105431	26	25	11	10	15	8.4	0.53	Quantitation summary for protein	129/126	1.02	26	1.045	*	130/126	0.869	26	[1.105]		131/126	0.475	26	1.218	*	129/127	1.169	26	[1.079]		130/127	1.003	26	1.064		131/127	0.549	26	1.169	*	129/128	0.882	26	[1.050]		130/128	0.747
1077	gi|363745104	PREDICTED: ADP-ribosylation factor-binding protein GGA1-like [Gallus gallus]	713	83313	32	30	8	8	13.2	5.27	0.42	Quantitation summary for protein	129/126	0.712	30	[1.190]		130/126	0.875	30	1.116	*	131/126	0.715	30	1.223	*	129/127	0.598	30	[1.252]		130/127	0.74	30	1.116	*	131/127	0.606	30	[1.208]		129/128	0.678	30	[1.167]		130/128	0.829
1078	gi|118087111	PREDICTED: inositol monophosphatase 1 [Gallus gallus]	713	34991	36	30	10	8	30.9	5.51	1.71	Quantitation summary for protein	129/126	0.995	32	1.059		130/126	0.917	32	[1.089]		131/126	1.236	32	1.198	*	129/127	0.948	32	1.091	*	130/127	0.88	32	1.067	*	131/127	1.188	32	[1.168]		129/128	1.039	32	1.02	*	130/128	0.951
1079	gi|118091246	PREDICTED: 60S ribosomal protein L27a [Gallus gallus]	712	21266	30	27	7	6	37.2	10.86	2.22	Quantitation summary for protein	129/126	1.08	29	[1.040]		130/126	1.048	29	[1.188]		131/126	1.059	29	[1.260]		129/127	1.053	29	[1.069]		130/127	1.029	29	[1.155]		131/127	1.042	29	[1.239]		129/128	1.034	29	[1.056]		130/128	0.998
1080	gi|363743586	PREDICTED: LOW QUALITY PROTEIN: alanyl-tRNA editing protein Aarsd1 [Gallus gallus]	712	69272	30	26	11	9	20.9	5.44	0.66	Quantitation summary for protein	129/126	0.781	28	1.057	*	130/126	0.759	27	1.076	*	131/126	0.715	28	1.139	*	129/127	0.784	28	1.067	*	130/127	0.777	28	1.06	*	131/127	0.725	28	1.108	*	129/128	0.806	28	[1.052]		130/128	0.788
1081	gi|53130886	hypothetical protein RCJMB04_10n18 [Gallus gallus]	710	32855	36	32	11	9	26.3	4.9	1.88	Quantitation summary for protein	129/126	0.835	26	[1.110]		130/126	0.822	26	[1.144]		131/126	0.704	26	[1.296]		129/127	1.01	26	[1.161]		130/127	1.001	26	[1.095]		131/127	0.859	26	[1.238]		129/128	0.956	26	1.054	*	130/128	0.935
1082	gi|118098842	PREDICTED: cytochrome b-c1 complex subunit 9-like [Gallus gallus]	710	8268	24	23	3	3	45.2	6.84	7.47	Quantitation summary for protein	129/126	0.82	23	1.143	*	130/126	1.058	23	1.066	*	131/126	1.476	23	[1.217]		129/127	0.636	23	[1.173]		130/127	0.827	23	[1.085]		131/127	1.157	23	[1.255]		129/128	0.754	22	1.055	*	130/128	0.981
1083	gi|118098058	PREDICTED: 40S ribosomal protein S15a isoform 1 [Gallus gallus]	709	17710	58	46	8	8	55.4	10.07	18.29	Quantitation summary for protein	129/126	1.112	51	[1.039]		130/126	1.06	51	[1.071]		131/126	1.124	51	[1.138]		129/127	0.971	51	[1.063]		130/127	0.931	51	[1.078]		131/127	0.99	51	[1.138]		129/128	1.142	51	1.042	*	130/128	1.08
1084	gi|363744257	PREDICTED: beta-hexosaminidase subunit beta [Gallus gallus]	709	68868	43	36	11	10	21.5	5.96	1.11	Quantitation summary for protein	129/126	0.94	40	[1.046]		130/126	1.203	40	1.032	*	131/126	1.202	40	[1.074]		129/127	0.764	40	[1.058]		130/127	0.985	40	1.033	*	131/127	0.986	40	[1.070]		129/128	0.944	40	[1.022]		130/128	1.2
1085	gi|212258	macrophage migration inhibitory factor [Gallus gallus]	708	14538	27	23	3	3	31.3	6.88	7.19	Quantitation summary for protein	129/126	0.961	26	[1.162]		130/126	1.064	26	1.122	*	131/126	1.372	26	1.255	*	129/127	0.952	26	[1.150]		130/127	1.061	26	[1.117]		131/127	1.372	26	1.219	*	129/128	0.967	26	[1.118]		130/128	1.064
1086	gi|118099263	PREDICTED: ubiquinone biosynthesis protein COQ4 homolog, mitochondrial [Gallus gallus]	708	32463	20	18	6	4	24.8	6.92	0.8	Quantitation summary for protein	129/126	1.067	19	1.041	*	130/126	1.079	19	[1.111]		131/126	1.059	19	[1.176]		129/127	0.93	19	1.062	*	130/127	0.946	19	[1.091]		131/127	0.931	19	[1.152]		129/128	0.981	19	1.054		130/128	0.985
1087	gi|50729640	PREDICTED: coproporphyrinogen-III oxidase, mitochondrial [Gallus gallus]	708	51303	34	28	11	10	34.9	8.56	0.98	Quantitation summary for protein	129/126	1.122	30	1.034	*	130/126	1.302	30	[1.040]		131/126	1.005	30	1.088		129/127	0.903	30	[1.034]		130/127	1.056	30	1.042	*	131/127	0.816	30	[1.094]		129/128	1.057	30	1.034	*	130/128	1.219
1088	gi|118100253	PREDICTED: pre-mRNA-processing-splicing factor 8 [Gallus gallus]	708	310118	37	26	15	10	5.9	8.94	0.15	Quantitation summary for protein	129/126	0.97	29	1.063	*	130/126	1.246	29	1.054	*	131/126	0.906	29	1.063	*	129/127	1.083	29	[1.151]		130/127	1.401	29	[1.121]		131/127	1.021	29	[1.149]		129/128	0.945	29	[1.075]		130/128	1.206
1089	gi|53135475	hypothetical protein RCJMB04_25d21 [Gallus gallus]	704	65304	25	20	8	6	22.5	5.57	0.41	Quantitation summary for protein	129/126	1.436	21	[1.076]		130/126	0.726	21	1.103	*	131/126	0.561	21	[1.212]		129/127	1.618	21	[1.121]		130/127	0.823	21	1.065	*	131/127	0.638	21	1.161	*	129/128	1.079	21	1.039	*	130/128	0.542
1090	gi|289800	initiation factor 5A [Gallus gallus]	704	20432	45	37	7	7	41.2	5.37	4.34	Quantitation summary for protein	129/126	1.269	16	[1.100]		130/126	0.52	16	[1.181]		131/126	0.3	16	[1.451]		129/127	1.714	16	[1.189]		130/127	0.707	16	1.09	*	131/127	0.409	16	[1.331]		129/128	1.254	16	1.075	*	130/128	0.51
1091	gi|60098713	hypothetical protein RCJMB04_6o2 [Gallus gallus]	702	89859	32	27	12	12	17.9	6.6	0.65	Quantitation summary for protein	129/126	1.17	28	[1.029]		130/126	1.151	28	[1.052]		131/126	1.124	28	[1.059]		129/127	1.106	27	1.022	*	130/127	1.058	28	[1.058]		131/127	1.036	28	[1.064]		129/128	1.249	28	1.034	*	130/128	1.22
1092	gi|23821364	mitochondrial transcription factor A [Gallus gallus]	700	36785	35	28	14	10	43.9	10.3	2.07	Quantitation summary for protein	129/126	0.616	31	1.075	*	130/126	1.1	31	1.107	*	131/126	1.649	31	1.171	*	129/127	0.589	31	1.104	*	130/127	1.058	31	1.065	*	131/127	1.59	31	[1.132]		129/128	0.831	31	1.025	*	130/128	1.474
1093	gi|53127304	hypothetical protein RCJMB04_1l22 [Gallus gallus]	700	72713	24	23	7	7	13.7	7.64	0.36	Quantitation summary for protein	129/126	0.89	23	1.058	*	130/126	1.032	23	[1.075]		131/126	0.895	23	1.084	*	129/127	0.945	23	[1.094]		130/127	1.103	23	1.043	*	131/127	0.96	23	1.057	*	129/128	0.842	23	1.025	*	130/128	0.97
1094	gi|26801170	cohesin complex subunit [Gallus gallus]	698	170985	46	30	20	14	16.7	6.65	0.38	Quantitation summary for protein	129/126	1.095	33	[1.067]		130/126	1.11	33	[1.039]		131/126	1.007	33	1.087		129/127	1.156	33	[1.077]		130/127	1.181	33	[1.033]		131/127	1.074	33	1.064	*	129/128	1.058	34	[1.065]		130/128	1.066
1095	gi|63705	unnamed protein product [Gallus gallus]	698	41090	43	34	12	11	34	4.66	2.73	Quantitation summary for protein	129/126	1.071	42	1.047	*	130/126	1.097	42	[1.119]		131/126	1.216	42	[1.181]		129/127	1.096	42	1.088	*	130/127	1.131	42	1.068	*	131/127	1.257	42	[1.131]		129/128	1.055	42	1.032	*	130/128	1.073
1096	gi|60098679	hypothetical protein RCJMB04_5g1 [Gallus gallus]	697	56819	26	22	6	6	15	5.65	0.57	Quantitation summary for protein	129/126	1.015	24	[1.061]		130/126	0.873	24	[1.125]		131/126	0.825	24	[1.214]		129/127	1.231	24	[1.113]		130/127	1.066	24	[1.083]		131/127	1.01	24	1.158		129/128	1.089	24	1.044	*	130/128	0.931
1097	gi|363733066	PREDICTED: uncharacterized protein LOC769205 [Gallus gallus]	696	72672	34	26	13	12	23.8	9.03	1.03	Quantitation summary for protein	129/126	1.023	27	1.042	*	130/126	1.019	27	1.062		131/126	1.12	27	1.093	*	129/127	0.942	26	1.047	*	130/127	0.931	26	1.04	*	131/127	1.03	27	[1.074]		129/128	0.974	27	1.032	*	130/128	0.964
1098	gi|363729785	PREDICTED: la-related protein 4B [Gallus gallus]	696	92713	23	20	7	5	12.1	8.23	0.23	Quantitation summary for protein	129/126	1.055	20	[1.060]		130/126	0.815	20	1.038	*	131/126	0.769	20	1.104	*	129/127	1.221	20	[1.064]		130/127	0.949	20	1.041	*	131/127	0.898	20	1.106	*	129/128	1.148	20	1.048	*	130/128	0.881
1099	gi|363740147	PREDICTED: malectin-like [Gallus gallus]	695	37919	40	31	11	10	38.5	5.23	2.22	Quantitation summary for protein	129/126	1.198	37	[1.033]		130/126	1.206	37	[1.051]		131/126	0.954	37	[1.100]		129/127	1.218	37	[1.062]		130/127	1.234	37	1.036	*	131/127	0.978	37	[1.076]		129/128	1.163	36	1.018	*	130/128	1.152
1100	gi|257216574	ADF actin binding protein [Gallus gallus]	695	19877	39	33	11	9	69	5.33	9.45	Quantitation summary for protein	129/126	0.749	36	1.217	*	130/126	0.887	36	[1.277]		131/126	1.219	36	[1.479]		129/127	0.89	36	[1.268]		130/127	1.062	36	[1.145]		131/127	1.463	36	1.317	*	129/128	0.762	36	1.061	*	130/128	0.897
1101	gi|118084259	PREDICTED: 60S ribosomal protein L31 [Gallus gallus]	694	18323	46	36	8	7	45.6	10.54	16.71	Quantitation summary for protein	129/126	1.105	40	1.061	*	130/126	1.024	40	[1.089]		131/126	1.144	40	[1.163]		129/127	1.024	40	1.068	*	130/127	0.955	40	[1.061]		131/127	1.07	40	[1.132]		129/128	1.196	40	1.038	*	130/128	1.1
1102	gi|118091958	PREDICTED: alpha-1-antiproteinase 2 [Gallus gallus]	691	56642	31	25	11	10	31.3	6.71	1.21	Quantitation summary for protein	129/126	1.019	27	1.057		130/126	1.043	27	1.066	*	131/126	0.798	27	[1.105]		129/127	0.68	27	[1.096]		130/127	0.7	27	1.048	*	131/127	0.539	26	1.087	*	129/128	1.026	27	[1.037]		130/128	1.043
1103	gi|126165	RecName: Full=16 kDa beta-galactoside-binding lectin; AltName: Full=C-16; AltName: Full=Galectin CG-16	691	18590	45	35	9	7	56.7	4.95	6.43	Quantitation summary for protein	129/126	0.815	38	1.057	*	130/126	0.952	38	1.053	*	131/126	1.154	38	[1.108]		129/127	0.831	38	1.063	*	130/127	0.977	38	1.044	*	131/127	1.188	38	[1.098]		129/128	1.04	38	1.034	*	130/128	1.207
1104	gi|363735279	PREDICTED: LOW QUALITY PROTEIN: canalicular multispecific organic anion transporter 1 [Gallus gallus]	690	197556	45	36	19	15	12.6	8.72	0.34	Quantitation summary for protein	129/126	1.484	40	1.069	*	130/126	1.18	40	[1.057]		131/126	0.824	40	1.102	*	129/127	1.736	40	1.087	*	130/127	1.389	40	1.044	*	131/127	0.972	40	1.076	*	129/128	1.222	40	1.046	*	130/128	0.965
1105	gi|363736886	PREDICTED: calponin-3 [Gallus gallus]	689	42531	34	23	9	6	31.7	6.2	1.46	Quantitation summary for protein	129/126	1.041	27	1.044	*	130/126	1.022	27	[1.098]		131/126	1.035	27	[1.138]		129/127	1.169	27	[1.075]		130/127	1.157	27	1.068	*	131/127	1.174	27	[1.106]		129/128	1.118	27	1.039	*	130/128	1.092
1106	gi|363736855	PREDICTED: adenylate kinase isoenzyme 4, mitochondrial [Gallus gallus]	689	28184	36	29	10	9	49.8	8.51	4.34	Quantitation summary for protein	129/126	0.894	35	1.072	*	130/126	0.921	35	[1.116]		131/126	0.85	35	1.078	*	129/127	0.868	35	1.082	*	130/127	0.901	35	[1.117]		131/127	0.833	35	1.072	*	129/128	0.869	35	1.052	*	130/128	0.889
1107	gi|363729279	PREDICTED: 28S ribosomal protein S31, mitochondrial [Gallus gallus]	688	48765	25	23	7	6	19	8.77	0.58	Quantitation summary for protein	129/126	1.043	23	1.034	*	130/126	1.043	22	[1.062]		131/126	1.078	22	[1.093]		129/127	0.892	23	1.042	*	130/127	0.915	21	1.047	*	131/127	0.928	22	[1.070]		129/128	0.988	23	[1.031]		130/128	0.983
1108	gi|363741723	PREDICTED: uncharacterized protein LOC419143 [Gallus gallus]	686	24968	23	22	3	3	24.6	9.16	0.87	Quantitation summary for protein	129/126	1.13	23	[1.049]		130/126	1.145	22	1.028	*	131/126	1.787	23	1.056	*	129/127	1.04	23	[1.040]		130/127	1.048	23	1.024	*	131/127	1.66	23	1.041	*	129/128	1.204	22	1.036	*	130/128	1.214
1109	gi|118083604	PREDICTED: 60S ribosomal protein L24 [Gallus gallus]	685	24311	44	27	10	9	45.9	11.26	9.17	Quantitation summary for protein	129/126	1.085	34	[1.039]		130/126	0.953	33	1.04	*	131/126	1.197	34	1.075	*	129/127	1.1	33	1.037	*	130/127	0.96	34	1.048	*	131/127	1.221	34	1.069	*	129/128	1.19	34	1.037	*	130/128	1.027
1110	gi|60098467	hypothetical protein RCJMB04_2k8 [Gallus gallus]	685	28491	29	25	9	7	42	9.17	2.37	Quantitation summary for protein	129/126	1.086	10	1.057	*	130/126	1.164	10	1.075	*	131/126	0.701	10	[1.138]		129/127	1.325	10	1.081	*	130/127	1.429	10	1.106	*	131/127	0.863	10	1.097	*	129/128	1.237	10	1.056	*	130/128	1.316
1111	gi|53126991	hypothetical protein RCJMB04_1i11 [Gallus gallus]	684	32876	24	21	8	6	32.6	5.29	0.96	Quantitation summary for protein	129/126	0.972	22	1.043	*	130/126	0.952	22	1.056	*	131/126	0.742	22	[1.133]		129/127	1.04	22	1.037	*	130/127	1.025	22	1.049	*	131/127	0.801	22	1.126	*	129/128	1.121	22	1.04	*	130/128	1.091
1112	gi|363741740	PREDICTED: glutathione synthetase [Gallus gallus]	684	56663	40	34	15	14	41.1	5.67	1.93	Quantitation summary for protein	129/126	1.005	34	1.039		130/126	1.081	34	[1.059]		131/126	1.174	34	1.084	*	129/127	0.929	34	1.052	*	130/127	1.007	34	[1.049]		131/127	1.096	34	1.076	*	129/128	0.965	34	1.045	*	130/128	1.032
1113	gi|118092660	PREDICTED: 40S ribosomal protein S24 isoform 4 [Gallus gallus]	684	20687	42	29	8	5	45.8	10.91	6.1	Quantitation summary for protein	129/126	0.933	32	1.047	*	130/126	1.451	32	[1.106]		131/126	2.33	32	1.158	*	129/127	0.663	32	1.11	*	130/127	1.038	32	1.052	*	131/127	1.672	32	[1.105]		129/128	1.023	32	1.04	*	130/128	1.58
1114	gi|118101652	PREDICTED: proteasome subunit beta type-2 isoform 2 [Gallus gallus]	683	26016	39	29	6	5	27.9	6.07	1.63	Quantitation summary for protein	129/126	0.928	36	1.04	*	130/126	0.966	36	1.088	*	131/126	1.266	36	1.139	*	129/127	0.907	36	[1.067]		130/127	0.951	36	1.061	*	131/127	1.249	36	[1.111]		129/128	1.08	36	1.033	*	130/128	1.116
1115	gi|118099302	PREDICTED: kynurenine--oxoglutarate transaminase 1 isoform 2 [Gallus gallus]	683	59002	40	36	14	13	34.4	6.61	1.26	Quantitation summary for protein	129/126	1.022	38	1.041	*	130/126	0.995	38	[1.064]		131/126	1.076	38	1.083	*	129/127	0.996	38	1.034		130/127	0.976	38	1.039	*	131/127	1.058	38	1.075	*	129/128	1.018	37	1.02	*	130/128	0.967
1116	gi|363738753	PREDICTED: protein SEC13 homolog [Gallus gallus]	683	39796	39	31	14	9	39.7	5.07	1.82	Quantitation summary for protein	129/126	1.296	34	[1.065]		130/126	0.696	34	1.137	*	131/126	0.713	34	1.233	*	129/127	1.36	34	[1.101]		130/127	0.736	34	1.098	*	131/127	0.754	34	[1.190]		129/128	1.198	34	1.046	*	130/128	0.639
1117	gi|228008358	heat shock 105kDa [Gallus gallus]	682	114983	38	36	11	10	14.6	5.02	0.36	Quantitation summary for protein	129/126	1.252	35	1.044	*	130/126	0.975	35	1.065	*	131/126	1.02	35	[1.069]		129/127	1.406	35	1.058	*	130/127	1.102	35	[1.074]		131/127	1.156	35	1.054	*	129/128	1.287	34	1.036	*	130/128	0.994
1118	gi|2754696	high molecular mass nuclear antigen [Gallus gallus]	679	121900	33	27	10	9	12.5	9.87	0.3	Quantitation summary for protein	129/126	1.054	28	1.074	*	130/126	1.085	29	[1.060]		131/126	1.534	29	1.095	*	129/127	1.212	29	1.112	*	130/127	1.264	29	1.046	*	131/127	1.791	29	1.082	*	129/128	1.139	29	[1.053]		130/128	1.173
1119	gi|53130636	hypothetical protein RCJMB04_9b22 [Gallus gallus]	677	38581	24	16	4	2	11.1	8.57	0.51	Quantitation summary for protein	129/126	0.83	21	[1.031]		130/126	1.085	21	1.056	*	131/126	0.939	21	1.075	*	129/127	1.031	21	1.019	*	130/127	1.358	21	1.041	*	131/127	1.178	21	1.056	*	129/128	0.86	21	[1.042]		130/128	1.118
1120	gi|363738072	PREDICTED: probable D-lactate dehydrogenase, mitochondrial-like, partial [Gallus gallus]	676	50042	15	15	5	5	15.3	5.94	0.47	Quantitation summary for protein	129/126	1.02	15	1.057		130/126	0.958	15	1.063	*	131/126	0.83	15	[1.098]		129/127	1.038	15	1.074		130/127	0.978	14	1.045		131/127	0.852	15	1.092	*	129/128	0.911	15	[1.056]		130/128	0.846
1121	gi|170015974	thioredoxin reductase 2, mitochondrial [Gallus gallus]	676	65548	25	22	4	4	7.3	8.4	0.28	Quantitation summary for protein	129/126	0.864	25	1.045	*	130/126	0.819	25	[1.034]		131/126	0.924	25	1.048	*	129/127	0.771	25	[1.045]		130/127	0.736	25	[1.042]		131/127	0.833	25	1.045	*	129/128	0.878	25	1.035	*	130/128	0.828
1122	gi|363728313	PREDICTED: coiled-coil domain-containing protein 58 [Gallus gallus]	675	19895	23	22	5	5	41.7	7.67	1.56	Quantitation summary for protein	129/126	0.887	23	1.031	*	130/126	1.007	23	[1.064]		131/126	1.241	23	[1.077]		129/127	0.763	23	[1.073]		130/127	0.872	23	[1.033]		131/127	1.077	23	1.024	*	129/128	0.949	22	1.028	*	130/128	1.063
1123	gi|118099099	PREDICTED: UDP-N-acteylglucosamine pyrophosphorylase 1-like 1 [Gallus gallus]	675	64075	30	26	11	9	26.3	6.11	0.73	Quantitation summary for protein	129/126	1.105	21	1.06	*	130/126	0.94	20	1.063	*	131/126	0.927	21	1.087	*	129/127	1.23	21	1.06	*	130/127	1.056	20	1.066	*	131/127	1.042	21	1.095		129/128	1.123	21	1.067	*	130/128	0.948
1124	gi|294861490	fascin 1 [Gallus gallus]	674	62384	37	33	11	10	23.9	6.8	1.05	Quantitation summary for protein	129/126	1.01	36	1.027	*	130/126	0.894	36	1.052	*	131/126	0.925	36	1.064	*	129/127	1.122	36	1.051	*	130/127	1	36	1.04		131/127	1.037	36	1.051	*	129/128	1.013	36	[1.025]		130/128	0.89
1125	gi|363732447	PREDICTED: mitochondrial peptide methionine sulfoxide reductase [Gallus gallus]	674	29538	22	18	5	4	30	8.88	1.35	Quantitation summary for protein	129/126	0.943	20	1.04	*	130/126	1.028	19	1.031	*	131/126	1.201	20	1.061	*	129/127	0.851	20	1.049	*	130/127	0.938	20	1.05	*	131/127	1.095	20	1.047	*	129/128	0.893	20	1.04	*	130/128	0.971
1126	gi|53133342	hypothetical protein RCJMB04_15l3 [Gallus gallus]	673	73048	27	21	8	6	17.3	6.31	0.42	Quantitation summary for protein	129/126	1.165	25	[1.050]		130/126	1.091	25	[1.072]		131/126	1.002	25	[1.082]		129/127	1.139	25	1.047	*	130/127	1.073	25	[1.049]		131/127	0.988	25	[1.060]		129/128	0.895	25	1.031	*	130/128	0.832
1127	gi|118093046	PREDICTED: caspase-7 [Gallus gallus]	672	42746	15	10	6	4	24.4	6.03	0.56	Quantitation summary for protein	129/126	1.106	13	[1.101]		130/126	0.962	10	[1.309]		131/126	1.221	12	1.059	*	129/127	1.021	12	[1.091]		130/127	0.893	10	[1.403]		131/127	1.13	12	1.124	*	129/128	0.997	11	1.061		130/128	0.858
1128	gi|53130750	hypothetical protein RCJMB04_9n20 [Gallus gallus]	670	49120	32	27	9	7	26.5	8.53	0.79	Quantitation summary for protein	129/126	0.853	28	[1.036]		130/126	0.922	28	1.036	*	131/126	1.127	28	1.069	*	129/127	0.929	28	1.045	*	130/127	1.011	28	[1.028]		131/127	1.239	28	1.058	*	129/128	1.113	28	1.033	*	130/128	1.195
1129	gi|363739893	PREDICTED: golgin subfamily A member 3 [Gallus gallus]	669	199943	29	23	15	11	13.9	5.26	0.23	Quantitation summary for protein	129/126	1	25	1.028		130/126	0.891	25	[1.071]		131/126	0.908	25	[1.128]		129/127	1.226	25	[1.064]		130/127	1.099	25	1.033	*	131/127	1.122	25	[1.089]		129/128	1.11	25	1.025	*	130/128	0.982
1130	gi|118090950	PREDICTED: NADH dehydrogenase [ubiquinone] iron-sulfur protein 8, mitochondrial [Gallus gallus]	668	26441	22	21	5	5	27.8	5.84	1.59	Quantitation summary for protein	129/126	0.769	20	[1.069]		130/126	1.208	21	[1.136]		131/126	1.13	21	1.095	*	129/127	0.612	20	[1.079]		130/127	0.968	21	[1.138]		131/127	0.908	21	1.098	*	129/128	0.862	20	1.048	*	130/128	1.345
1131	gi|363744612	PREDICTED: UV excision repair protein RAD23 homolog B [Gallus gallus]	666	47560	34	31	8	8	23.1	4.7	1.09	Quantitation summary for protein	129/126	0.794	32	1.09	*	130/126	1.069	32	1.076	*	131/126	1.226	32	[1.138]		129/127	0.716	32	[1.112]		130/127	0.971	32	[1.046]		131/127	1.115	32	[1.094]		129/128	0.951	32	[1.054]		130/128	1.273
1132	gi|363742840	PREDICTED: threonyl-tRNA synthetase, mitochondrial-like [Gallus gallus]	664	84484	32	27	13	11	21	6.69	0.58	Quantitation summary for protein	129/126	0.858	20	[1.054]		130/126	1.217	20	[1.156]		131/126	1	20	[1.210]		129/127	0.642	20	[1.156]		130/127	0.906	19	1.063	*	131/127	0.755	20	[1.128]		129/128	0.833	20	1.043	*	130/128	1.174
1133	gi|53136702	hypothetical protein RCJMB04_32k7 [Gallus gallus]	664	42010	19	17	8	6	27.1	6.5	0.98	Quantitation summary for protein	129/126	1.011	18	1.059		130/126	1.117	18	1.08	*	131/126	1.103	18	1.099	*	129/127	0.98	18	1.053		130/127	1.091	18	1.043	*	131/127	1.08	18	1.064	*	129/128	1.002	18	1.027		130/128	1.101
1134	gi|12381877	ribosomal protein L35 [Gallus gallus]	664	20730	39	27	8	7	39.8	11.04	4.21	Quantitation summary for protein	129/126	1.047	30	1.122	*	130/126	1.137	30	1.144	*	131/126	2.06	30	[1.364]		129/127	0.877	30	1.19	*	130/127	0.959	30	1.089	*	131/127	1.742	30	[1.316]		129/128	1.239	29	1.037	*	130/128	1.337
1135	gi|118083002	PREDICTED: cat eye syndrome critical region protein 5 [Gallus gallus]	664	50420	22	18	9	7	24.3	8.46	0.88	Quantitation summary for protein	129/126	1.029	21	1.064	*	130/126	1.092	21	1.054	*	131/126	1.106	21	1.107	*	129/127	0.808	19	1.057	*	130/127	0.904	21	1.058	*	131/127	0.918	21	1.105	*	129/128	0.944	21	1.066	*	130/128	0.996
1136	gi|60098991	hypothetical protein RCJMB04_18f23 [Gallus gallus]	664	80165	19	15	7	6	17	5.6	0.32	Quantitation summary for protein	129/126	1.076	19	1.068	*	130/126	0.832	19	1.068	*	131/126	0.912	19	1.101	*	129/127	1.048	19	[1.071]		130/127	0.815	19	1.081	*	131/127	0.896	19	1.107	*	129/128	1.026	19	1.039	*	130/128	0.787
1137	gi|363731234	PREDICTED: kinesin light chain 4 [Gallus gallus]	664	84062	33	23	13	11	22	6.18	0.58	Quantitation summary for protein	129/126	1.109	26	1.044	*	130/126	1.018	26	[1.084]		131/126	0.917	26	[1.120]		129/127	1.157	26	1.093	*	130/127	1.07	26	1.04	*	131/127	0.966	26	[1.073]		129/128	1.163	26	1.027	*	130/128	1.062
1138	gi|118091927	PREDICTED: ectonucleoside triphosphate diphosphohydrolase 5 [Gallus gallus]	663	58917	27	22	11	9	30.5	5.76	1.38	Quantitation summary for protein	129/126	1.011	25	1.084		130/126	1.262	25	[1.055]		131/126	1.332	25	[1.179]		129/127	0.915	25	[1.088]		130/127	1.15	25	1.053	*	131/127	1.217	25	[1.140]		129/128	0.992	23	1.034		130/128	1.228
1139	gi|2623879	heat shock protein 10 [Gallus gallus]	662	13883	46	28	9	5	62.7	8.68	10.22	Quantitation summary for protein	129/126	0.749	37	1.152	*	130/126	0.947	37	[1.104]		131/126	1.197	37	[1.168]		129/127	0.646	37	[1.246]		130/127	0.822	37	1.063	*	131/127	1.041	37	1.1	*	129/128	0.944	37	1.067	*	130/128	1.21
1140	gi|60098743	hypothetical protein RCJMB04_7k22 [Gallus gallus]	662	75107	34	30	15	12	31	8.42	0.98	Quantitation summary for protein	129/126	1.024	29	[1.176]		130/126	1.063	29	[1.148]		131/126	1.132	29	[1.236]		129/127	0.897	29	[1.283]		130/127	0.938	29	[1.064]		131/127	1.002	29	[1.171]		129/128	0.924	29	1.053	*	130/128	0.953
1141	gi|256419027	eukaryotic translation initiation factor 3 subunit I [Gallus gallus]	661	40991	33	27	10	7	29.8	5.38	0.86	Quantitation summary for protein	129/126	1.103	27	1.041	*	130/126	0.847	27	[1.082]		131/126	1.054	27	[1.162]		129/127	1.11	27	1.066	*	130/127	0.858	27	1.068	*	131/127	1.07	27	[1.143]		129/128	1.201	27	1.023	*	130/128	0.917
1142	gi|118085960	PREDICTED: MAGUK p55 subfamily member 6 [Gallus gallus]	661	75617	43	38	12	12	18.7	5.95	0.81	Quantitation summary for protein	129/126	1.111	40	[1.035]		130/126	1.005	40	1.053		131/126	0.985	40	1.05		129/127	1.188	40	[1.044]		130/127	1.083	40	1.04	*	131/127	1.063	40	1.04	*	129/128	1.183	40	1.025	*	130/128	1.064
1143	gi|63422	microsomal signal peptidase [Gallus gallus]	660	22566	21	21	4	4	23.3	8.71	2.03	Quantitation summary for protein	129/126	1.316	21	[1.076]		130/126	1.126	21	1.094	*	131/126	1.099	21	1.164	*	129/127	1.491	21	1.097	*	130/127	1.284	21	1.111	*	131/127	1.256	21	1.132	*	129/128	1.214	21	1.071	*	130/128	1.031
1144	gi|50742739	PREDICTED: 40S ribosomal protein S12 [Gallus gallus]	658	18830	31	26	8	6	48.5	6.81	3.39	Quantitation summary for protein	129/126	1.09	28	1.075	*	130/126	1.109	28	1.081	*	131/126	1.676	28	[1.188]		129/127	1.117	28	[1.112]		130/127	1.144	28	1.055	*	131/127	1.734	28	[1.164]		129/128	1.061	28	1.038	*	130/128	1.072
1145	gi|118083201	PREDICTED: 28S ribosomal protein S35, mitochondrial isoform 2 [Gallus gallus]	658	44063	21	18	8	6	19.5	8.66	0.78	Quantitation summary for protein	129/126	0.979	20	1.064		130/126	0.876	20	1.102	*	131/126	0.892	20	[1.214]		129/127	0.896	20	[1.129]		130/127	0.807	20	1.043	*	131/127	0.823	20	[1.148]		129/128	0.879	20	1.031	*	130/128	0.782
1146	gi|363728259	PREDICTED: alpha-2-macroglobulin-like protein 1-like [Gallus gallus]	657	223657	48	33	16	14	9.9	5.69	0.32	Quantitation summary for protein	129/126	0.878	41	1.042	*	130/126	0.96	41	[1.060]		131/126	0.8	41	[1.111]		129/127	0.676	41	1.049	*	130/127	0.744	41	[1.041]		131/127	0.622	41	[1.097]		129/128	0.723	41	1.033	*	130/128	0.785
1147	gi|363747229	PREDICTED: putative all-trans-retinol 13,14-reductase [Gallus gallus]	655	76274	38	25	16	11	25.8	9.29	0.8	Quantitation summary for protein	129/126	0.935	33	1.046	*	130/126	1.209	33	[1.110]		131/126	0.867	33	[1.187]		129/127	0.872	33	1.05	*	130/127	1.135	33	1.074	*	131/127	0.816	33	1.151	*	129/128	0.761	33	1.059	*	130/128	0.978
1148	gi|303304963	26S proteasome non-ATPase regulatory subunit 14 [Gallus gallus]	655	39528	29	17	11	9	32.9	6	1.42	Quantitation summary for protein	129/126	1.241	19	[1.069]		130/126	1.004	19	1.071		131/126	1.071	19	[1.159]		129/127	1.212	19	[1.111]		130/127	0.987	19	1.05		131/127	1.055	19	1.125		129/128	1.21	19	1.028	*	130/128	0.972
1149	gi|4514720	ezrin [Gallus gallus]	654	82271	69	50	17	13	23.4	5.9	1.27	Quantitation summary for protein	129/126	1.093	20	[1.026]		130/126	1.184	20	1.042	*	131/126	1.173	20	[1.098]		129/127	0.933	20	[1.032]		130/127	0.996	19	1.021		131/127	1.011	20	[1.090]		129/128	1.105	20	[1.025]		130/128	1.189
1150	gi|438525	progesterone receptor, partial [Gallus gallus]	653	19837	25	24	4	4	32.2	4.22	1.56	Quantitation summary for protein	129/126	1.222	25	1.091	*	130/126	0.896	25	[1.071]		131/126	0.792	25	[1.144]		129/127	1.395	25	[1.103]		130/127	1.07	24	1.042	*	131/127	0.912	25	[1.106]		129/128	1.196	25	1.045	*	130/128	0.872
1151	gi|118083116	PREDICTED: sorting and assembly machinery component 50 homolog [Gallus gallus]	652	57514	33	26	14	13	37.7	5.99	1.18	Quantitation summary for protein	129/126	1	32	1.063		130/126	1.039	32	1.098	*	131/126	1.055	29	[1.105]		129/127	0.958	32	1.09	*	130/127	1.002	32	1.068		131/127	1.02	29	[1.079]		129/128	0.856	32	1.057	*	130/128	0.883
1152	gi|53133850	hypothetical protein RCJMB04_20p1 [Gallus gallus]	651	27814	39	32	8	6	32.3	5.11	1.21	Quantitation summary for protein	129/126	1.09	35	[1.032]		130/126	1.064	34	[1.064]		131/126	1.218	35	[1.103]		129/127	0.918	35	[1.080]		130/127	0.911	35	[1.067]		131/127	1.058	36	[1.107]		129/128	1.069	35	[1.025]		130/128	1.037
1153	gi|53127442	hypothetical protein RCJMB04_2h4 [Gallus gallus]	650	67036	29	23	13	11	25.2	8.81	0.86	Quantitation summary for protein	129/126	1.218	20	1.036	*	130/126	1.065	27	[1.079]		131/126	0.824	27	1.091	*	129/127	1.355	27	[1.113]		130/127	1.241	27	[1.054]		131/127	0.962	27	1.078	*	129/128	1.22	27	1.026	*	130/128	1.103
1154	gi|228312418	Chain F, Cytochrome Bc1 Complex From Chicken	649	16339	44	28	9	7	50.9	9.25	6.97	Quantitation summary for protein	129/126	0.6	22	1.159	*	130/126	1.083	22	[1.241]		131/126	1.139	22	[1.415]		129/127	0.546	22	[1.286]		130/127	0.993	22	1.131		131/127	1.046	22	[1.295]		129/128	0.723	22	1.058	*	130/128	1.297
1155	gi|53131155	hypothetical protein RCJMB04_11f2 [Gallus gallus]	648	26282	29	22	10	7	44.9	6.75	3.72	Quantitation summary for protein	129/126	1.012	27	1.069		130/126	1.005	27	1.061		131/126	1.106	27	1.077	*	129/127	0.963	27	1.088	*	130/127	0.962	27	1.052	*	131/127	1.061	27	1.073	*	129/128	1.195	26	1.027	*	130/128	1.179
1156	gi|363741936	PREDICTED: leucine-rich repeat-containing protein 47 [Gallus gallus]	647	65820	29	25	11	9	24.9	8.28	0.63	Quantitation summary for protein	129/126	0.951	26	1.033	*	130/126	0.894	26	1.053	*	131/126	0.885	26	[1.076]		129/127	0.96	26	[1.047]		130/127	0.909	26	1.037	*	131/127	0.902	26	[1.059]		129/128	1.011	26	[1.032]		130/128	0.944
1157	gi|53136866	hypothetical protein RCJMB04_35d23 [Gallus gallus]	647	29529	19	11	6	3	24.1	5.57	0.71	Quantitation summary for protein	129/126	0.971	13	[1.095]		130/126	0.786	13	1.047	*	131/126	0.98	13	[1.112]		129/127	1.101	13	[1.126]		130/127	0.897	13	1.039	*	131/127	1.121	13	[1.083]		129/128	1.065	13	1.041	*	130/128	0.856
1158	gi|50740326	PREDICTED: neudesin [Gallus gallus]	647	20624	31	28	7	6	53.7	4.99	2.34	Quantitation summary for protein	129/126	0.858	28	1.03	*	130/126	0.812	28	1.049	*	131/126	0.739	28	1.08	*	129/127	0.898	28	[1.061]		130/127	0.856	28	1.026	*	131/127	0.781	28	1.069	*	129/128	1.025	28	[1.029]		130/128	0.964
1159	gi|53127722	hypothetical protein RCJMB04_3c5 [Gallus gallus]	646	80791	22	21	9	9	16.6	5.95	0.43	Quantitation summary for protein	129/126	1.087	21	1.065	*	130/126	0.801	21	[1.138]		131/126	0.673	21	1.218	*	129/127	1.331	21	1.135	*	130/127	0.988	21	[1.064]		131/127	0.831	21	1.137	*	129/128	1.134	21	1.032	*	130/128	0.83
1160	gi|118090533	PREDICTED: OCIA domain-containing protein 1 [Gallus gallus]	645	33460	32	27	8	6	32.4	6.93	1.13	Quantitation summary for protein	129/126	0.874	29	1.06	*	130/126	1.045	29	1.033	*	131/126	1.198	29	1.051	*	129/127	0.824	29	[1.073]		130/127	0.992	29	[1.043]		131/127	1.139	29	[1.055]		129/128	0.846	29	1.041	*	130/128	1.004
1161	gi|53126268	hypothetical protein RCJMB04_1b22 [Gallus gallus]	644	65747	35	29	9	8	19	4.74	0.63	Quantitation summary for protein	129/126	0.688	30	1.048	*	130/126	0.796	30	[1.067]		131/126	0.772	30	[1.126]		129/127	0.913	30	[1.048]		130/127	1.064	30	1.037	*	131/127	1.034	30	[1.091]		129/128	0.912	30	1.032	*	130/128	1.048
1162	gi|60098481	hypothetical protein RCJMB04_2m11 [Gallus gallus]	644	79202	20	19	9	8	16.1	5.44	0.44	Quantitation summary for protein	129/126	1.059	19	[1.039]		130/126	1.303	19	1.043	*	131/126	0.854	19	1.098	*	129/127	1.628	19	1.059	*	130/127	2.016	19	1.053	*	131/127	1.324	19	[1.081]		129/128	1.058	19	1.029	*	130/128	1.292
1163	gi|363735880	PREDICTED: splicing factor 3B subunit 1 [Gallus gallus]	643	165854	31	23	16	12	18	6.65	0.31	Quantitation summary for protein	129/126	0.87	25	1.097	*	130/126	1.094	25	1.109	*	131/126	0.795	25	[1.136]		129/127	1.011	25	1.137		130/127	1.281	25	1.128	*	131/127	0.932	25	1.131	*	129/128	0.914	25	1.081	*	130/128	1.143
1164	gi|53130866	hypothetical protein RCJMB04_10k5 [Gallus gallus]	642	33500	32	27	8	8	30.7	5.39	1.57	Quantitation summary for protein	129/126	0.939	28	1.067	*	130/126	0.687	28	1.099	*	131/126	0.628	28	[1.166]		129/127	1.344	27	1.067	*	130/127	0.984	28	1.063		131/127	0.902	28	[1.121]		129/128	0.892	28	1.033	*	130/128	0.648
1165	gi|118104260	PREDICTED: peroxisomal NADH pyrophosphatase NUDT12 [Gallus gallus]	642	58965	22	20	4	3	10.3	7.27	0.24	Quantitation summary for protein	129/126	1.433	21	[1.060]		130/126	1.293	21	1.032	*	131/126	1.28	21	1.026	*	129/127	1.184	21	[1.068]		130/127	1.076	21	[1.042]		131/127	1.043	19	1.024	*	129/128	1.118	21	[1.043]		130/128	1.003
1166	gi|1711595	RecName: Full=Eukaryotic translation initiation factor 1; Short=eIF1; AltName: Full=Protein translation factor SUI1 homolog	642	11863	12	12	4	4	50.6	9.2	1.14	Quantitation summary for protein	129/126	1.012	12	1.131		130/126	0.682	12	1.134	*	131/126	0.627	12	1.3	*	129/127	1.176	12	1.208	*	130/127	0.811	10	1.038	*	131/127	0.736	12	1.23	*	129/128	1.164	12	1.062	*	130/128	0.78
1167	gi|211987	immunoglobulin heavy chain V-region, partial [Gallus gallus]	640	12794	15	14	4	3	43	7.86	1.59	Quantitation summary for protein	129/126	---	0	---		130/126	---	0	---		131/126	---	0	---		129/127	---	0	---		130/127	---	0	---		131/127	---	0	---		129/128	---	0	---		130/128	---
1168	gi|363746230	PREDICTED: ubiquitin thioesterase OTUB1-like [Gallus gallus]	640	34020	21	20	9	9	39.6	5	1.54	Quantitation summary for protein	129/126	1.046	20	1.03	*	130/126	0.983	20	1.055		131/126	1.01	21	1.088		129/127	1.089	21	1.038	*	130/127	1.041	21	[1.080]		131/127	1.069	21	1.09	*	129/128	1.061	21	[1.049]		130/128	1.016
1169	gi|363743824	PREDICTED: uncharacterized protein LOC420108 [Gallus gallus]	640	28550	32	19	8	7	29.2	6.54	1.42	Quantitation summary for protein	129/126	0.514	20	[1.212]		130/126	0.556	20	[1.224]		131/126	0.56	20	[1.432]		129/127	1.375	20	[1.171]		130/127	1.497	20	1.127	*	131/127	1.51	20	[1.381]		129/128	0.496	20	[1.203]		130/128	0.533
1170	gi|50759417	PREDICTED: short-chain dehydrogenase/reductase 3 [Gallus gallus]	639	38131	14	14	3	3	12.9	9.11	0.28	Quantitation summary for protein	129/126	0.959	14	1.055	*	130/126	1.142	14	1.046	*	131/126	0.651	14	1.037	*	129/127	1.157	14	1.076	*	130/127	1.387	14	1.032	*	131/127	0.793	14	1.035	*	129/128	0.848	14	1.022	*	130/128	1.004
[truncated: 3,306 more rows]
[truncated: 8 more columns]

## Sheet: Quantified Proteins
Header	--------------------------------------------------------
Search title	Gallus TMT6plex Jan15
Timestamp	2015-01-24T12:41:19Z
User	Sheng
Email	sz14
[truncated: 3,819 more rows]
[truncated: 7 more columns]
