# Supplementary material for: Module 7: Multilevel Models for Binary Responses (Technical Appendix: A Primer on Estimation of Multilevel Binary Response Models)
Source: Royal Society of Chemistry journal article supplement (doi:10.1039/c9fo02861g), 2009-01-01
Supplement: c9fo02861g3.xlsx [file c9fo02861g3.xlsx]

## Sheet: Protein Summary
Header	--------------------------------------------------------
Search title	Gallus TMT6plex Jan15
Timestamp	2015-02-02T05:28:37Z
User	Sheng
Email	sz14
Report URI	http://mascot.biotech.cornell.edu/mascot/cgi/master_results.pl?file=../data/20150201/F402898.dat
Peak list data path	D:\data\20150127\Xingen10325634TMT6plexSetPZmerged.mgf
Peak list format	Mascot generic
Search type	MIS
Mascot version	2.3.02
Database	gallus
Fasta file	GallusRefSeq1Apr13.fasta
Total sequences	37321
Total residues	16201765
Sequences after taxonomy filter	37321
Number of queries	351067
Decoy	--------------------------------------------------------
			FDR %
Number of matches above identity threshold in search of real database	83554
Number of matches above identity threshold in search of decoy database	1289		1.5
Number of matches above homology threshold in search of real database	93863
Number of matches above homology threshold in search of decoy database	2530
Fixed modifications	--------------------------------------------------------
Identifier	Name	Delta	Neutral loss
1	Carbamidomethyl (C)	57.0215
2	TMT6plex (N-term)	229.163
3	TMT6plex (K)	229.163
Variable modifications	--------------------------------------------------------
Identifier	Name	Delta	Neutral loss(es)
1	Deamidated (NQ)	0.984016
2	Oxidation (M)	15.9949	0	63.9983
Search Parameters	--------------------------------------------------------
Taxonomy filter	All entries
Enzyme	Trypsin
Maximum Missed Cleavages	2
Fixed modifications	Carbamidomethyl (C),TMT6plex (N-term),TMT6plex (K)
Quantitation method	TMT 6plex_9 ratios_Yumei
Variable modifications	Deamidated (NQ),Oxidation (M)
Peptide Mass Tolerance	15
Peptide Mass Tolerance Units	ppm
Fragment Mass Tolerance	100
Fragment Mass Tolerance Units	mmu
Mass values	Monoisotopic
Instrument type	Default
Decoy database also searched	1
Format parameters	--------------------------------------------------------
Significance threshold	0.05
Max. number of hits	0
Use MudPIT protein scoring	1
Ions score cut-off	20
Include same-set proteins
Include sub-set proteins	0
Include unassigned	0
Require bold red	1
Use homology threshold	0
Group protein families	0
Re-score using Percolator	0
Protein hits	--------------------------------------------------------
prot_hit_num	prot_acc	prot_desc	prot_score	prot_mass	prot_matches	prot_matches_sig	prot_sequences	prot_sequences_sig	prot_cover	prot_pi	emPAI
1	gi|63007	unnamed protein product [Gallus gallus]	37090	46734	1414	1243	36	32	68.9	5.3	1480.18	Quantitation summary for protein	129/126	0.71	379	[1.107]		130/126	0.732	377	[1.157]		131/126	0.725	380	[1.120]		129/127	0.771	380	[1.073]		130/127	0.773	377	[1.106]		131/127	0.793	380	[1.073]		129/128	1.137	377	[1.080]		130/128	1.131
2	gi|127759	RecName: Full=Myosin-9; AltName: Full=Cellular myosin heavy chain, type A; AltName: Full=Myosin heavy chain 9; AltName: Full=Myosin heavy chain, non-muscle IIa; AltName: Full=Non-muscle myosin heavy chain A; Short=NMMHC-A; AltName: Full=Non-muscle m	21461	275571	836	688	169	149	62.4	5.47	26.53	Quantitation summary for protein	129/126	1.257	604	[1.048]		130/126	0.993	605	[1.074]		131/126	1.026	605	[1.047]		129/127	1.479	602	[1.026]		130/127	1.146	603	[1.028]		131/127	1.22	603	1.022	*	129/128	0.42	605	[1.077]		130/128	0.325
3	gi|63027	alpha-cardiac actin [Gallus gallus]	21273	46917	1000	851	34	29	67.4	5.23	393.01	Quantitation summary for protein	129/126	0.858	34	[1.098]		130/126	1.322	34	[1.151]		131/126	1.319	34	[1.107]		129/127	0.481	34	1.142	*	130/127	0.726	34	1.117	*	131/127	0.746	34	1.069	*	129/128	0.855	34	[1.089]		130/128	1.289
4	gi|63029	a-actin [Gallus gallus]	20162	46949	968	826	33	28	65.8	5.23	227.85	Quantitation summary for protein	129/126	1.373	7	1.064	*	130/126	1.981	7	1.044	*	131/126	1.246	7	1.041	*	129/127	1.298	7	1.095	*	130/127	1.836	7	1.061	*	131/127	1.189	7	1.061	*	129/128	1.812	7	1.075	*	130/128	2.56
5	gi|63634	unnamed protein product [Gallus gallus]	13440	277045	522	443	133	118	54.3	5.5	7.8	Quantitation summary for protein	129/126	1.197	273	[1.057]		130/126	1.153	273	[1.088]		131/126	0.994	273	[1.056]		129/127	1.44	271	[1.034]		130/127	1.361	272	[1.037]		131/127	1.208	271	[1.028]		129/128	0.421	275	[1.096]		130/128	0.396
6	gi|26000436	talin [Gallus gallus]	13173	315489	471	404	140	124	60.5	5.9	6.49	Quantitation summary for protein	129/126	1.12	371	[1.038]		130/126	1.028	368	[1.050]		131/126	1.109	373	[1.040]		129/127	0.972	370	[1.024]		130/127	0.875	370	[1.026]		131/127	0.972	371	[1.024]		129/128	0.328	375	[1.057]		130/128	0.296
7	gi|211827	78-kD glucose-regulated protein precursor [Gallus gallus]	12178	86067	535	439	66	56	66.4	5.12	72.7	Quantitation summary for protein	129/126	1.286	430	[1.070]		130/126	1.067	430	[1.101]		131/126	1.254	430	[1.076]		129/127	1.737	428	1.04	*	130/127	1.413	428	[1.046]		131/127	1.709	428	[1.039]		129/128	2.65	417	[1.082]		130/128	2.156
8	gi|63417	alpha-globin [Gallus gallus]	11543	18492	526	455	21	20	97.2	7.01	7027.94	Quantitation summary for protein	129/126	---	0	---		130/126	---	0	---		131/126	---	0	---		129/127	---	0	---		130/127	---	0	---		131/127	---	0	---		129/128	---	0	---		130/128	---
9	gi|63516	unnamed protein product [Gallus gallus]	11168	102968	442	378	58	52	65.1	5.01	28.32	Quantitation summary for protein	129/126	1.16	324	[1.065]		130/126	1.196	325	[1.093]		131/126	1.144	324	[1.072]		129/127	1.159	324	[1.031]		130/127	1.172	325	[1.033]		131/127	1.154	324	1.026	*	129/128	1.327	323	[1.072]		130/128	1.341
10	gi|63013	alpha-D globin [Gallus gallus]	10591	18291	454	398	18	17	97.2	7.01	2383.28	Quantitation summary for protein	129/126	---	1	---		130/126	---	1	---		131/126	---	1	---		129/127	---	1	---		130/127	---	1	---		131/127	---	1	---		129/128	---	1	---		130/128	---
11	gi|974176	enolase [Gallus gallus]	10511	56097	395	332	37	33	64.7	6.17	113	Quantitation summary for protein	129/126	1.133	125	[1.250]		130/126	1.087	124	[1.445]		131/126	0.946	126	[1.305]		129/127	1.296	127	1.153	*	130/127	1.216	126	[1.234]		131/127	1.094	128	1.106	*	129/128	2.372	123	[1.337]		130/128	2.232
12	gi|119359	RecName: Full=Endoplasmin; AltName: Full=Heat shock 108 kDa protein; Short=HSP 108; Short=HSP108; AltName: Full=Heat shock protein 90 kDa beta member 1; AltName: Full=Transferrin-binding protein; Flags: Precursor	9981	110517	422	356	66	59	66.8	4.83	36.2	Quantitation summary for protein	129/126	1.753	12	1.121	*	130/126	1.424	12	1.199	*	131/126	2.752	12	1.189	*	129/127	1.387	12	1.102	*	130/127	1.104	12	1.084	*	131/127	2.198	12	1.113	*	129/128	0.407	12	1.089	*	130/128	0.323
13	gi|2506442	RecName: Full=Glyceraldehyde-3-phosphate dehydrogenase; Short=GAPDH; AltName: Full=Peptidyl-cysteine S-nitrosylase GAPDH	9979	42097	383	319	29	25	68.5	8.71	248.89	Quantitation summary for protein	129/126	1.169	117	[1.189]		130/126	1.08	117	[1.314]		131/126	0.969	117	[1.212]		129/127	1.234	119	[1.137]		130/127	1.121	119	[1.128]		131/127	1.033	119	[1.114]		129/128	1.446	119	[1.378]		130/128	1.313
14	gi|63167	unnamed protein product [Gallus gallus]	9946	53762	450	391	29	26	68.2	4.78	186.87	Quantitation summary for protein	129/126	0.819	45	[1.173]		130/126	0.883	45	[1.325]		131/126	0.913	45	1.213	*	129/127	1.326	45	1.118	*	130/127	1.403	45	1.089	*	131/127	1.493	45	1.081	*	129/128	1.04	45	1.168		130/128	1.099
15	gi|2996407	heat shock cognate 70 [Gallus gallus]	9763	83386	460	349	46	42	56.2	5.47	54.24	Quantitation summary for protein	129/126	0.923	218	[1.103]		130/126	0.903	217	[1.176]		131/126	0.889	215	[1.115]		129/127	1.113	223	[1.054]		130/127	1.069	223	[1.060]		131/127	1.082	220	[1.042]		129/128	1.126	224	[1.112]		130/128	1.08
16	gi|153792017	tubulin beta-3 chain [Gallus gallus]	9537	53952	443	388	30	27	69	4.78	232.13	Quantitation summary for protein	129/126	0.83	38	[1.137]		130/126	0.941	38	[1.237]		131/126	0.93	38	[1.144]		129/127	1.213	38	1.054	*	130/127	1.348	38	[1.085]		131/127	1.372	38	1.05	*	129/128	1.022	38	[1.110]		130/128	1.135
17	gi|63014	alpha-A globin [Gallus gallus]	9309	18512	410	338	14	14	76.1	8.54	945.01	Quantitation summary for protein	129/126	0.48	144	[1.193]		130/126	0.377	144	[1.247]		131/126	0.254	142	[1.276]		129/127	1.246	143	[1.113]		130/127	0.96	143	[1.141]		131/127	0.669	141	[1.150]		129/128	1.471	144	[1.272]		130/128	1.133
18	gi|50982399	annexin A6 [Gallus gallus]	9301	88183	354	296	66	58	76.6	5.57	88.15	Quantitation summary for protein	129/126	0.937	127	[1.129]		130/126	0.853	127	[1.205]		131/126	0.859	128	[1.132]		129/127	1.039	125	[1.069]		130/127	0.928	125	[1.072]		131/127	0.961	126	[1.059]		129/128	1.113	125	[1.159]		130/128	0.996
19	gi|53128246	hypothetical protein RCJMB04_4k19 [Gallus gallus]	9044	81447	366	317	47	45	71.5	5.16	72.76	Quantitation summary for protein	129/126	1.101	301	[1.077]		130/126	1.456	299	[1.151]		131/126	1.118	301	[1.088]		129/127	0.602	310	[1.068]		130/127	0.789	310	[1.055]		131/127	0.62	312	[1.053]		129/128	0.383	311	[1.131]		130/128	0.501
20	gi|63104	unnamed protein product [Gallus gallus]	8968	54044	418	366	28	25	59.8	4.78	105.89	Quantitation summary for protein	129/126	0.311	6	[1.398]		130/126	0.224	6	[1.783]		131/126	0.32	6	[1.488]		129/127	1.27	6	1.118	*	130/127	0.895	6	1.158		131/127	1.318	6	1.064	*	129/128	1.297	6	1.131	*	130/128	0.912
21	gi|135446	RecName: Full=Tubulin beta-1 chain; AltName: Full=Beta-tubulin class-I	8918	54000	414	362	27	24	58.9	4.78	100.7	Quantitation summary for protein	129/126	1.572	2	1.13		130/126	2.191	2	1.049	*	131/126	1.864	2	1.099		129/127	1.199	2	1.003	*	130/127	1.637	2	1.081		131/127	1.435	2	1.031	*	129/128	0.991	2	1.019		130/128	1.352
22	gi|63748	preproalbumin (serum albumin) [Gallus gallus]	8696	83097	483	369	57	52	72.2	5.51	69.41	Quantitation summary for protein	129/126	0.79	416	[1.098]		130/126	0.988	416	[1.159]		131/126	0.832	416	[1.108]		129/127	0.586	416	[1.063]		130/127	0.719	416	[1.058]		131/127	0.623	416	[1.051]		129/128	0.883	415	[1.124]		130/128	1.081
23	gi|448261627	ATP synthase subunit beta, mitochondrial precursor [Gallus gallus]	8327	61692	277	236	32	31	75.6	5.44	56.32	Quantitation summary for protein	129/126	0.993	254	[1.071]		130/126	1.002	252	[1.115]		131/126	0.962	254	[1.078]		129/127	1.085	253	[1.046]		130/127	1.071	252	[1.055]		131/127	1.061	252	[1.040]		129/128	2.001	244	1.12	*	130/128	1.993
24	gi|125608	RecName: Full=Pyruvate kinase muscle isozyme	8289	66913	331	287	41	36	66.8	7.29	39.02	Quantitation summary for protein	129/126	1.022	303	[1.131]		130/126	0.98	297	[1.209]		131/126	0.787	303	[1.146]		129/127	1.111	304	[1.064]		130/127	1.038	298	[1.078]		131/127	0.864	304	[1.057]		129/128	1.241	303	[1.172]		130/128	1.159
25	gi|197320840	beta-actin [Gallus gallus]	8262	11673	392	359	11	10	84.6	6.17	3928.94	Quantitation summary for protein	129/126	---	0	---		130/126	---	0	---		131/126	---	0	---		129/127	---	0	---		130/127	---	0	---		131/127	---	0	---		129/128	---	0	---		130/128	---
26	gi|15341202	filamin [Gallus gallus]	8211	303590	256	231	82	74	36.6	5.94	1.94	Quantitation summary for protein	129/126	1.012	166	[1.062]		130/126	1.235	166	[1.096]		131/126	1.214	166	1.068	*	129/127	0.684	167	[1.055]		130/127	0.821	169	[1.045]		131/127	0.829	168	[1.047]		129/128	0.418	167	1.111	*	130/128	0.5
27	gi|22651801	glucose regulated thiol oxidoreductase protein precursor [Gallus gallus]	7811	68462	315	268	48	44	66.9	5.76	45.57	Quantitation summary for protein	129/126	1.345	280	[1.079]		130/126	1.113	280	[1.127]		131/126	1.299	280	[1.087]		129/127	1.561	280	[1.049]		130/127	1.267	280	[1.042]		131/127	1.523	280	[1.042]		129/128	1.568	280	[1.120]		130/128	1.271
28	gi|53135040	hypothetical protein RCJMB04_24e12 [Gallus gallus]	7797	28646	296	251	22	20	80.1	6.97	589.03	Quantitation summary for protein	129/126	0.902	44	[1.282]		130/126	0.754	44	[1.366]		131/126	0.802	44	[1.293]		129/127	1.282	43	1.084	*	130/127	1.051	43	[1.112]		131/127	1.151	43	1.073	*	129/128	2.304	43	1.131	*	130/128	1.899
29	gi|53131756	hypothetical protein RCJMB04_12c19 [Gallus gallus]	7600	91919	333	277	42	36	55.3	7.51	17.3	Quantitation summary for protein	129/126	0.787	302	[1.095]		130/126	0.9	303	[1.191]		131/126	0.769	302	[1.114]		129/127	1.03	303	[1.065]		130/127	1.155	305	[1.074]		131/127	1.016	302	[1.050]		129/128	1.053	300	[1.140]		130/128	1.181
30	gi|4699641	Chain B, R-State Form Of Chicken Hemoglobin D	7279	19016	344	278	18	17	82.2	8.85	2999.45	Quantitation summary for protein	129/126	0.661	168	[1.256]		130/126	0.724	168	[1.312]		131/126	0.49	166	[1.276]		129/127	0.949	168	[1.104]		130/127	1.019	168	[1.105]		131/127	0.712	164	[1.121]		129/128	0.277	169	1.197	*	130/128	0.297
31	gi|33521618	heterogeneous nuclear ribonucleoprotein H1-like protein [Gallus gallus]	7109	60941	235	204	17	14	46.1	5.38	3.36	Quantitation summary for protein	129/126	1.089	212	1.047	*	130/126	0.996	212	[1.069]		131/126	1.026	212	[1.050]		129/127	1.067	212	[1.034]		130/127	0.957	212	[1.029]		131/127	1.015	212	[1.035]		129/128	1.31	211	[1.056]		130/128	1.174
32	gi|53126280	hypothetical protein RCJMB04_1c3 [Gallus gallus]	6974	100953	286	239	64	58	73.3	5.14	31.47	Quantitation summary for protein	129/126	1.159	250	[1.074]		130/126	1.002	248	[1.125]		131/126	0.962	248	[1.086]		129/127	1.168	251	[1.043]		130/127	0.991	250	[1.047]		131/127	0.98	249	[1.034]		129/128	1.615	246	[1.090]		130/128	1.369
33	gi|53130384	hypothetical protein RCJMB04_7g5 [Gallus gallus]	6969	73480	248	224	50	46	79.2	5.72	59.79	Quantitation summary for protein	129/126	0.885	224	[1.062]		130/126	0.769	222	[1.113]		131/126	0.854	224	[1.067]		129/127	1.209	224	[1.047]		130/127	1.028	222	[1.048]		131/127	1.178	225	[1.038]		129/128	1.459	217	[1.086]		130/128	1.24
34	gi|223280	tubulin alpha	6837	50613	255	209	29	28	64	5	37.82	Quantitation summary for protein	129/126	---	0	---		130/126	---	0	---		131/126	---	0	---		129/127	---	0	---		130/127	---	0	---		131/127	---	0	---		129/128	---	0	---		130/128	---
35	gi|30962014	heat shock protein 70 [Gallus gallus]	6826	83160	354	259	48	45	64.8	5.66	34.1	Quantitation summary for protein	129/126	0.935	126	[1.086]		130/126	1.001	126	[1.123]		131/126	0.837	126	[1.092]		129/127	0.893	128	1.044	*	130/127	0.938	128	[1.053]		131/127	0.807	128	[1.038]		129/128	1.279	128	1.105	*	130/128	1.342
36	gi|212873	vinculin [Gallus gallus]	6721	134912	274	236	82	71	68.3	6	14.32	Quantitation summary for protein	129/126	1.262	248	[1.051]		130/126	1.281	249	[1.082]		131/126	0.965	246	[1.052]		129/127	0.997	247	[1.033]		130/127	0.996	248	[1.027]		131/127	0.771	245	[1.027]		129/128	0.873	249	[1.076]		130/128	0.871
37	gi|1334725	unnamed protein product [Gallus gallus]	6597	28733	260	212	18	16	73	9.47	332.07	Quantitation summary for protein	129/126	1.361	7	1.07	*	130/126	0.992	7	1.211		131/126	0.707	7	[1.253]		129/127	2.373	7	1.209	*	130/127	1.697	7	1.106	*	131/127	1.246	7	1.081	*	129/128	2.741	7	[1.260]		130/128	1.958
38	gi|330417943	fructose-bisphosphate aldolase C [Gallus gallus]	6495	45006	207	182	31	28	60.7	6.2	85.91	Quantitation summary for protein	129/126	0.991	184	[1.108]		130/126	0.889	184	[1.146]		131/126	0.788	184	[1.113]		129/127	1.163	185	[1.056]		130/127	1.023	185	[1.060]		131/127	0.934	185	[1.057]		129/128	1.623	182	[1.106]		130/128	1.43
39	gi|211114	alpha-globin-A [Gallus gallus]	6439	18700	355	252	14	14	72.5	9.1	1267.68	Quantitation summary for protein	129/126	0.485	76	[1.130]		130/126	0.388	75	[1.179]		131/126	0.262	76	[1.193]		129/127	1.252	76	[1.111]		130/127	0.982	75	[1.099]		131/127	0.684	76	[1.126]		129/128	1.392	76	[1.295]		130/128	1.091
40	gi|260103640	cyclophilin A [Gallus gallus]	6189	21063	278	236	15	15	75.8	8.29	893.18	Quantitation summary for protein	129/126	0.598	241	[1.244]		130/126	0.483	240	[1.316]		131/126	0.574	239	[1.282]		129/127	1.058	241	[1.138]		130/127	0.836	239	[1.126]		131/127	1.021	239	[1.163]		129/128	1.57	240	[1.238]		130/128	1.239
41	gi|60099043	hypothetical protein RCJMB04_21b18 [Gallus gallus]	6156	38982	200	180	14	12	42.1	6.6	8.8	Quantitation summary for protein	129/126	1.124	183	[1.067]		130/126	1.025	183	[1.078]		131/126	1.036	183	[1.071]		129/127	1.093	184	[1.034]		130/127	0.977	184	[1.033]		131/127	1.017	184	[1.035]		129/128	1.597	183	[1.058]		130/128	1.425
42	gi|135468	RecName: Full=Tubulin beta-4 chain; AltName: Full=Beta-tubulin class-III	6134	54740	268	234	18	17	35.9	4.86	23.87	Quantitation summary for protein	129/126	0.935	8	1.211		130/126	1.19	8	[1.552]		131/126	1.006	8	1.251		129/127	1.098	8	1.147		130/127	1.37	8	[1.137]		131/127	1.193	8	1.096	*	129/128	1.067	8	1.247		130/128	1.33
43	gi|211083	alpha-actinin [Gallus gallus]	6128	116429	202	183	42	39	48.8	5.23	4.73	Quantitation summary for protein	129/126	1.12	3	1.056		130/126	1.496	3	1.043	*	131/126	1.039	3	1.076		129/127	0.614	3	1.034	*	130/127	0.805	3	1.013	*	131/127	0.575	3	1.03	*	129/128	0.329	3	1.062	*	130/128	0.43
44	gi|211077	actinin [Gallus gallus]	6083	116426	198	180	41	38	48.6	5.31	4.57	Quantitation summary for protein	129/126	---	1	---		130/126	---	1	---		131/126	---	1	---		129/127	---	1	---		130/127	---	1	---		131/127	---	1	---		129/128	---	1	---		130/128	---
45	gi|392018	filamin [Gallus gallus]	6034	316763	230	196	75	65	33.6	5.61	1.56	Quantitation summary for protein	129/126	1.09	192	[1.050]		130/126	1.126	192	[1.080]		131/126	1.18	192	[1.054]		129/127	0.835	191	1.027	*	130/127	0.846	192	[1.030]		131/127	0.912	192	[1.024]		129/128	0.752	190	[1.069]		130/128	0.761
46	gi|63711	unnamed protein product [Gallus gallus]	5978	96964	292	244	56	48	52.4	4.9	16.37	Quantitation summary for protein	129/126	0.935	266	[1.135]		130/126	1.034	266	[1.224]		131/126	0.911	266	[1.148]		129/127	0.994	266	[1.056]		130/127	1.079	266	[1.079]		131/127	0.978	266	[1.052]		129/128	1.273	262	[1.151]		130/128	1.387
47	gi|363745506	PREDICTED: ATP synthase subunit alpha, mitochondrial [Gallus gallus]	5951	67037	226	190	37	32	54.6	9.04	19.36	Quantitation summary for protein	129/126	1.138	47	[1.366]		130/126	1.058	47	[1.446]		131/126	1.008	46	[1.384]		129/127	0.995	47	1.115		130/127	0.907	47	[1.125]		131/127	0.889	46	[1.128]		129/128	1.957	47	[1.173]		130/128	1.782
48	gi|363737678	PREDICTED: IQ motif containing GTPase activating protein 1 [Gallus gallus]	5910	231218	210	173	66	60	41.2	6.22	2.43	Quantitation summary for protein	129/126	1.125	190	1.031	*	130/126	1.161	191	1.046	*	131/126	1.166	191	1.034	*	129/127	0.792	190	[1.024]		130/127	0.804	190	1.02	*	131/127	0.831	190	1.02	*	129/128	0.403	191	[1.066]		130/128	0.409
49	gi|63070	unnamed protein product [Gallus gallus]	5821	50739	241	197	28	27	63.8	4.96	32.96	Quantitation summary for protein	129/126	---	0	---		130/126	---	0	---		131/126	---	0	---		129/127	---	0	---		130/127	---	0	---		131/127	---	0	---		129/128	---	0	---		130/128	---
50	gi|63739	prolyl-4-hydroxylase (AA 5 - 494) [Gallus gallus]	5612	65486	228	194	35	32	53.3	4.66	16.96	Quantitation summary for protein	129/126	1.338	203	[1.117]		130/126	1.24	202	[1.183]		131/126	1.21	200	[1.127]		129/127	1.553	203	1.049	*	130/127	1.411	202	[1.061]		131/127	1.419	200	[1.041]		129/128	1.585	201	[1.113]		130/128	1.438
51	gi|50752600	PREDICTED: tubulin alpha-3 chain [Gallus gallus]	5508	55295	194	163	24	23	51.3	4.94	17.04	Quantitation summary for protein	129/126	---	0	---		130/126	---	0	---		131/126	---	0	---		129/127	---	0	---		130/127	---	0	---		131/127	---	0	---		129/128	---	0	---		130/128	---
52	gi|363734923	PREDICTED: cytoplasmic dynein 1 heavy chain 1 [Gallus gallus]	5234	595678	231	197	104	89	22.7	6.08	0.82	Quantitation summary for protein	129/126	1.027	207	1.034	*	130/126	0.996	209	[1.053]		131/126	1.139	210	[1.034]		129/127	0.956	209	[1.026]		130/127	0.91	210	[1.037]		131/127	1.071	211	[1.024]		129/128	0.196	209	[1.066]		130/128	0.186
53	gi|1184958	elongation factor 2 [Gallus gallus]	5187	111239	231	200	53	46	60.8	6.4	12.59	Quantitation summary for protein	129/126	0.89	176	[1.088]		130/126	0.717	176	[1.149]		131/126	0.842	176	[1.097]		129/127	1.21	176	[1.043]		130/127	0.956	176	[1.056]		131/127	1.157	176	1.04	*	129/128	1.117	176	[1.110]		130/128	0.882
54	gi|136056	RecName: Full=Triosephosphate isomerase; Short=TIM; AltName: Full=Triose-phosphate isomerase	5163	32103	199	169	24	22	79.8	6.71	91.98	Quantitation summary for protein	129/126	---	0	---		130/126	---	0	---		131/126	---	0	---		129/127	---	0	---		130/127	---	0	---		131/127	---	0	---		129/128	---	0	---		130/128	---
55	gi|1703321	RecName: Full=Annexin A6; AltName: Full=67 kDa calelectrin; AltName: Full=Annexin VI; AltName: Full=Annexin-6; AltName: Full=Calphobindin-II; Short=CPB-II; AltName: Full=Chromobindin-20; AltName: Full=Lipocortin VI; AltName: Full=P68; AltName: Full=	5044	88231	230	186	52	45	59.8	5.42	21.18	Quantitation summary for protein	129/126	0.983	11	1.228		130/126	1.018	11	[1.471]		131/126	0.953	11	1.23		129/127	1.119	11	[1.252]		130/127	1.137	11	1.086	*	131/127	1.095	11	[1.218]		129/128	1.035	11	1.723		130/128	1.05
56	gi|53127352	hypothetical protein RCJMB04_1p8 [Gallus gallus]	5024	98977	160	145	36	33	56.3	5.32	4.99	Quantitation summary for protein	129/126	0.901	147	1.076	*	130/126	0.82	146	[1.132]		131/126	0.77	146	1.078	*	129/127	1.077	148	[1.049]		130/127	0.957	148	1.064	*	131/127	0.93	147	[1.057]		129/128	1.246	144	[1.095]		130/128	1.108
57	gi|52695546	Chain A, Understanding Protein Lids: Structural Analysis Of Active Hinge Mutants In Triosephosphate Isomerase	4869	32258	177	154	23	21	78.5	7.26	54.3	Quantitation summary for protein	129/126	---	1	---		130/126	---	1	---		131/126	---	1	---		129/127	---	1	---		130/127	---	1	---		131/127	---	1	---		129/128	---	1	---		130/128	---
58	gi|134800	RecName: Full=Spectrin alpha chain, non-erythrocytic 1; AltName: Full=Alpha-II spectrin; AltName: Full=Fodrin alpha chain	4792	331589	197	169	87	78	37.8	5.21	1.56	Quantitation summary for protein	129/126	1.068	175	1.042	*	130/126	1.377	174	[1.070]		131/126	1.103	176	1.043	*	129/127	0.668	178	1.027	*	130/127	0.845	177	[1.031]		131/127	0.697	175	1.026	*	129/128	0.435	177	[1.081]		130/128	0.549
59	gi|53127438	hypothetical protein RCJMB04_2g17 [Gallus gallus]	4763	40915	164	149	19	17	61.3	8.67	14.14	Quantitation summary for protein	129/126	0.763	158	[1.126]		130/126	0.77	158	[1.203]		131/126	0.722	158	[1.135]		129/127	1.02	158	[1.073]		130/127	1.009	158	[1.072]		131/127	0.975	158	[1.064]		129/128	1.021	156	[1.159]		130/128	1.018
60	gi|50758110	PREDICTED: malate dehydrogenase, mitochondrial [Gallus gallus]	4754	43130	180	155	32	27	82.6	8.83	56.68	Quantitation summary for protein	129/126	0.687	164	[1.111]		130/126	0.746	163	[1.142]		131/126	0.646	162	[1.124]		129/127	1.045	163	[1.038]		130/127	0.955	162	[1.046]		131/127	0.993	162	[1.038]		129/128	1.963	160	[1.058]		130/128	1.77
61	gi|363727954	PREDICTED: cytoskeleton-associated protein 4 [Gallus gallus]	4663	67387	175	144	41	31	71.7	4.96	13.38	Quantitation summary for protein	129/126	1.018	156	[1.073]		130/126	1.002	156	[1.122]		131/126	0.995	156	[1.083]		129/127	1.29	155	[1.037]		130/127	1.246	155	[1.040]		131/127	1.274	155	[1.030]		129/128	1.716	155	1.062	*	130/128	1.655
62	gi|60098741	hypothetical protein RCJMB04_7k16 [Gallus gallus]	4642	59671	215	177	34	27	57.6	8.76	12.83	Quantitation summary for protein	129/126	0.867	189	[1.067]		130/126	0.743	190	[1.106]		131/126	0.755	189	[1.077]		129/127	1.031	189	1.03	*	130/127	0.867	190	1.04	*	131/127	0.907	189	1.024	*	129/128	1.262	189	[1.102]		130/128	1.06
63	gi|118102310	PREDICTED: tubulin alpha-1C chain [Gallus gallus]	4640	55293	144	127	24	23	54.9	5.01	10.36	Quantitation summary for protein	129/126	1.089	12	1.058	*	130/126	1.422	12	1.146	*	131/126	1.15	12	[1.079]		129/127	1.235	12	1.072	*	130/127	1.582	12	1.088	*	131/127	1.318	12	1.052	*	129/128	0.638	12	1.182	*	130/128	0.816
64	gi|8133188	voltage-dependent anion channel [Gallus gallus]	4603	36481	149	130	20	18	65.7	8.61	28.57	Quantitation summary for protein	129/126	0.854	136	[1.113]		130/126	1.061	136	[1.228]		131/126	0.995	136	[1.137]		129/127	0.835	136	[1.089]		130/127	1.017	136	[1.069]		131/127	0.983	136	[1.071]		129/128	1.631	131	[1.210]		130/128	2.002
65	gi|2148922	tissue transglutaminase [Gallus gallus]	4568	85679	166	154	29	28	49.5	4.92	6.31	Quantitation summary for protein	129/126	1.001	8	[1.066]		130/126	0.845	8	1.079	*	131/126	0.817	8	1.043	*	129/127	1.041	8	1.086		130/127	0.862	8	1.048	*	131/127	0.857	8	1.062	*	129/128	1.251	8	1.076	*	130/128	1.035
66	gi|124339781	clathrin heavy chain 1 [Gallus gallus]	4558	215943	157	147	52	48	40.1	5.52	1.86	Quantitation summary for protein	129/126	1.076	73	1.082	*	130/126	1.026	72	1.114	*	131/126	1.182	73	1.089	*	129/127	0.958	73	[1.073]		130/127	0.898	71	1.054	*	131/127	1.063	73	1.057	*	129/128	0.237	73	1.165	*	130/128	0.222
67	gi|83754919	Chain A, Crystal Structure Of Aluminum-Bound Ovotransferrin At 2.15 Angstrom Resolution	4548	91268	201	153	45	38	56.9	6.7	10.01	Quantitation summary for protein	129/126	---	0	---		130/126	---	0	---		131/126	---	0	---		129/127	---	0	---		130/127	---	0	---		131/127	---	0	---		129/128	---	0	---		130/128	---
68	gi|135469	RecName: Full=Tubulin beta-5 chain; AltName: Full=Beta-tubulin class-V	4487	54062	215	187	25	23	58.7	4.79	38.11	Quantitation summary for protein	129/126	0.843	40	[1.219]		130/126	0.769	40	[1.502]		131/126	0.82	40	[1.244]		129/127	1.269	40	1.132	*	130/127	1.135	40	[1.171]		131/127	1.246	40	1.098	*	129/128	1.185	40	[1.302]		130/128	1.062
69	gi|363744460	PREDICTED: heterogeneous nuclear ribonucleoprotein K-like isoform 1 [Gallus gallus]	4401	52685	209	159	27	23	55.2	6.09	19.7	Quantitation summary for protein	129/126	0.894	166	[1.147]		130/126	0.874	165	[1.228]		131/126	0.837	166	[1.159]		129/127	1.089	166	[1.078]		130/127	1.043	165	[1.077]		131/127	1.029	166	[1.066]		129/128	1.19	164	[1.161]		130/128	1.141
70	gi|212794	transglutaminase [Gallus gallus]	4398	86533	160	148	29	28	48.9	4.88	5.9	Quantitation summary for protein	129/126	1.117	2	1.535		130/126	3.281	2	2.43		131/126	1.562	2	1.651		129/127	0.596	2	1.085		130/127	1.716	2	1.459		131/127	0.842	2	1.009	*	129/128	0.329	2	1.797		130/128	0.947
71	gi|560038	PGK [Gallus gallus]	4352	55400	185	137	33	30	56.1	8.31	25.87	Quantitation summary for protein	129/126	1.182	166	[1.097]		130/126	1.034	165	[1.178]		131/126	0.961	166	[1.107]		129/127	1.295	167	[1.072]		130/127	1.109	166	[1.064]		131/127	1.063	167	[1.054]		129/128	1.207	167	[1.162]		130/128	1.032
72	gi|53131390	hypothetical protein RCJMB04_11l21 [Gallus gallus]	4311	32741	148	120	26	21	70.2	4.73	102.12	Quantitation summary for protein	129/126	1.189	99	[1.234]		130/126	1.329	99	[1.462]		131/126	1.122	99	[1.271]		129/127	0.852	99	[1.129]		130/127	0.934	99	[1.135]		131/127	0.812	99	[1.100]		129/128	1.106	98	[1.316]		130/128	1.211
73	gi|71274077	ovotransferrin CC type [Gallus gallus]	4292	93554	188	142	43	36	53.2	7.08	7.74	Quantitation summary for protein	129/126	---	1	---		130/126	---	1	---		131/126	---	1	---		129/127	---	1	---		130/127	---	1	---		131/127	---	1	---		129/128	---	1	---		130/128	---
74	gi|488468	elongation factor 1 alpha [Gallus gallus]	4269	61467	213	175	26	26	52.2	9.1	9.42	Quantitation summary for protein	129/126	1.809	127	[1.213]		130/126	2.23	127	[1.277]		131/126	1.971	128	[1.251]		129/127	0.941	129	1.13	*	130/127	1.137	129	[1.099]		131/127	1.036	130	[1.116]		129/128	0.745	127	[1.231]		130/128	0.899
75	gi|212449	nonmuscle myosin heavy chain [Gallus gallus]	4266	275470	202	160	72	62	36.3	5.42	1.78	Quantitation summary for protein	129/126	1.131	77	1.081	*	130/126	1.214	76	1.115	*	131/126	1.037	74	1.071	*	129/127	1.088	78	[1.043]		130/127	1.145	77	[1.053]		131/127	1.007	76	1.035		129/128	0.497	77	1.106	*	130/128	0.523
76	gi|3420726	Rab-GDP dissociation inhibitor [Gallus gallus]	4238	58669	173	152	30	29	68.8	5.23	20.17	Quantitation summary for protein	129/126	1.131	152	[1.076]		130/126	1.247	153	[1.133]		131/126	1.094	152	[1.087]		129/127	0.984	155	1.059	*	130/127	1.065	158	1.043	*	131/127	0.962	157	[1.050]		129/128	0.658	157	[1.140]		130/128	0.712
77	gi|383087734	ribosome-binding protein 1 [Gallus gallus]	4230	138715	169	147	57	47	54.1	5.29	3.76	Quantitation summary for protein	129/126	1.561	152	[1.076]		130/126	1.106	152	[1.131]		131/126	2.044	152	[1.088]		129/127	1.988	152	1.05	*	130/127	1.381	152	[1.049]		131/127	2.628	152	1.052	*	129/128	1.401	152	[1.085]		130/128	0.972
78	gi|348167222	beta-actin [Gallus gallus]	4208	17664	159	114	7	5	45.5	5.04	12.83	Quantitation summary for protein	129/126	---	0	---		130/126	---	0	---		131/126	---	0	---		129/127	---	0	---		130/127	---	0	---		131/127	---	0	---		129/128	---	0	---		130/128	---
79	gi|44969706	chaperonin subunit 8 theta [Gallus gallus]	4198	69871	150	140	34	33	56.8	5.35	14.05	Quantitation summary for protein	129/126	1.046	144	[1.065]		130/126	1.084	142	[1.104]		131/126	0.98	144	[1.075]		129/127	1.078	144	[1.041]		130/127	1.089	142	[1.041]		131/127	1.02	144	[1.031]		129/128	1.211	144	[1.087]		130/128	1.221
80	gi|3420175	WDR1 protein [Gallus gallus]	4197	77521	158	135	28	26	46	6.19	5.46	Quantitation summary for protein	129/126	0.946	147	[1.100]		130/126	1.017	147	[1.133]		131/126	0.813	147	[1.106]		129/127	0.836	147	[1.043]		130/127	0.881	147	[1.044]		131/127	0.725	147	[1.041]		129/128	0.913	147	[1.094]		130/128	0.961
81	gi|118096822	PREDICTED: transketolase [Gallus gallus]	4163	79694	181	140	37	32	56.3	7.27	13.91	Quantitation summary for protein	129/126	1.024	156	[1.127]		130/126	0.833	152	[1.273]		131/126	0.773	156	[1.157]		129/127	1.19	156	[1.071]		130/127	0.942	152	[1.109]		131/127	0.907	156	[1.056]		129/128	1.87	153	[1.173]		130/128	1.484
82	gi|17225596	ATP synthase alpha subunit [Gallus gallus]	4134	67596	181	151	35	29	47	9.29	12.59	Quantitation summary for protein	129/126	---	0	---		130/126	---	0	---		131/126	---	0	---		129/127	---	0	---		130/127	---	0	---		131/127	---	0	---		129/128	---	0	---		130/128	---
83	gi|209156645	Chain B, Tarantula Heavy Meromyosin Obtained By Flexible Docking To Tarantula Muscle Thick Filament Cryo-Em 3d-Map	4131	133365	173	148	38	33	33	6.8	2.98	Quantitation summary for protein	129/126	---	0	---		130/126	---	0	---		131/126	---	0	---		129/127	---	0	---		130/127	---	0	---		131/127	---	0	---		129/128	---	0	---		130/128	---
84	gi|363728854	PREDICTED: uncharacterized protein LOC770637 [Gallus gallus]	4107	471955	153	136	54	45	18.9	7.59	0.46	Quantitation summary for protein	129/126	0.852	139	[1.042]		130/126	1.045	140	[1.063]		131/126	1.137	139	[1.043]		129/127	1.076	138	[1.027]		130/127	1.293	141	1.033	*	131/127	1.449	138	1.029	*	129/128	0.881	139	[1.053]		130/128	1.058
85	gi|113990	RecName: Full=Apolipoprotein A-I; Short=Apo-AI; Short=ApoA-I; AltName: Full=Apolipoprotein A1; Flags: Precursor	4077	36161	237	159	38	30	82.2	5.58	421.41	Quantitation summary for protein	129/126	1.22	8	[2.232]		130/126	1.686	8	[4.383]		131/126	1.209	7	[2.232]		129/127	0.581	8	[1.552]		130/127	0.787	8	1.544		131/127	0.581	7	1.473	*	129/128	1.076	8	[1.835]		130/128	1.457
86	gi|118095485	PREDICTED: sorting nexin-1 [Gallus gallus]	4076	68024	113	104	23	23	42.4	5.32	4.21	Quantitation summary for protein	129/126	0.776	100	[1.054]		130/126	0.745	100	[1.085]		131/126	0.772	100	[1.065]		129/127	1.096	100	1.053	*	130/127	1.031	100	[1.052]		131/127	1.1	100	1.036	*	129/128	0.983	100	[1.070]		130/128	0.924
87	gi|60098559	hypothetical protein RCJMB04_3m3 [Gallus gallus]	4040	67591	136	115	35	32	62.4	5.89	15.44	Quantitation summary for protein	129/126	0.961	119	1.084	*	130/126	0.806	119	[1.153]		131/126	0.863	120	[1.092]		129/127	1.24	121	1.057	*	130/127	1.018	121	1.056	*	131/127	1.125	120	[1.055]		129/128	1.909	121	1.18	*	130/128	1.565
88	gi|882147	CRMP-62 [Gallus gallus]	3897	70253	111	94	26	21	58.7	5.96	5.81	Quantitation summary for protein	129/126	0.896	88	[1.058]		130/126	0.9	88	[1.109]		131/126	0.743	86	1.067	*	129/127	1.111	87	1.044	*	130/127	1.094	87	1.049	*	131/127	0.93	86	[1.037]		129/128	1.266	87	[1.096]		130/128	1.245
89	gi|363736265	PREDICTED: tubulin alpha-5 chain-like [Gallus gallus]	3888	56335	188	148	25	23	55.9	4.95	15.12	Quantitation summary for protein	129/126	---	0	---		130/126	---	0	---		131/126	---	0	---		129/127	---	0	---		130/127	---	0	---		131/127	---	0	---		129/128	---	0	---		130/128	---
90	gi|118097631	PREDICTED: heat shock 70 kDa protein 4 isoform 2 [Gallus gallus]	3868	114515	153	135	54	46	65.7	5.26	5.59	Quantitation summary for protein	129/126	1.133	128	[1.057]		130/126	1.182	128	[1.093]		131/126	1.111	129	[1.060]		129/127	1.034	128	[1.039]		130/127	1.058	128	[1.032]		131/127	1.025	129	1.029	*	129/128	0.639	128	[1.085]		130/128	0.653
91	gi|126751	RecName: Full=Myristoylated alanine-rich C-kinase substrate; Short=MARCKS	3863	34129	112	100	22	20	81.9	4.48	33.14	Quantitation summary for protein	129/126	1.175	94	[1.138]		130/126	1.29	95	[1.199]		131/126	1.159	94	[1.135]		129/127	1.301	100	[1.086]		130/127	1.412	102	1.104	*	131/127	1.291	101	[1.108]		129/128	0.981	95	[1.209]		130/128	1.064
92	gi|127095	RecName: Full=Myeloid protein 1; AltName: Full=p33; Flags: Precursor	3849	39849	143	115	18	15	54.3	8.73	14.05	Quantitation summary for protein	129/126	1.61	39	[1.092]		130/126	0.854	38	[1.095]		131/126	0.753	38	1.067	*	129/127	4.068	37	1.179	*	130/127	2.104	37	1.136	*	131/127	1.906	37	[1.118]		129/128	2.632	33	1.105	*	130/128	1.375
93	gi|53127632	hypothetical protein RCJMB04_2m8 [Gallus gallus]	3727	85807	132	116	34	32	51.4	6.09	6.57	Quantitation summary for protein	129/126	1.279	120	1.052	*	130/126	1.08	120	[1.102]		131/126	1.195	120	1.058	*	129/127	1.258	120	1.037	*	130/127	1.042	120	[1.044]		131/127	1.188	120	1.031	*	129/128	1.202	120	1.083	*	130/128	0.994
94	gi|608483	kinectin [Gallus gallus]	3714	196440	186	145	72	59	52	5.72	2.38	Quantitation summary for protein	129/126	1.09	152	1.045	*	130/126	1.13	152	[1.060]		131/126	1.074	151	1.046	*	129/127	1.054	152	[1.026]		130/127	1.071	152	[1.027]		131/127	1.039	152	[1.025]		129/128	0.503	152	[1.076]		130/128	0.511
95	gi|53129586	hypothetical protein RCJMB04_5n23 [Gallus gallus]	3695	34759	215	166	41	38	79.8	4.69	448.58	Quantitation summary for protein	129/126	0.938	102	[1.154]		130/126	1.146	102	[1.282]		131/126	0.858	102	[1.156]		129/127	0.92	102	1.086	*	130/127	1.102	102	[1.091]		131/127	0.85	102	1.074	*	129/128	1.209	102	[1.269]		130/128	1.446
96	gi|63524	unnamed protein product [Gallus gallus]	3694	58129	133	109	18	15	34.5	6.84	3.67	Quantitation summary for protein	129/126	1.183	78	1.087	*	130/126	0.795	77	[1.123]		131/126	1.162	78	1.09	*	129/127	1.141	79	1.06	*	130/127	0.75	78	1.056	*	131/127	1.133	79	1.047	*	129/128	2.391	76	1.119	*	130/128	1.573
97	gi|118094253	PREDICTED: nucleoprotein TPR [Gallus gallus]	3662	307233	174	143	76	62	34.7	4.95	1.18	Quantitation summary for protein	129/126	1.008	151	[1.041]		130/126	1.14	151	[1.074]		131/126	1.034	151	[1.048]		129/127	0.897	150	[1.036]		130/127	0.995	150	[1.033]		131/127	0.93	150	[1.034]		129/128	0.767	147	[1.081]		130/128	0.854
98	gi|992993	myosin light chain kinase [Gallus gallus]	3652	251209	168	147	41	38	21.7	5.6	0.88	Quantitation summary for protein	129/126	0.983	150	[1.040]		130/126	1.193	150	[1.071]		131/126	1.16	150	[1.045]		129/127	0.803	152	[1.037]		130/127	0.955	152	[1.032]		131/127	0.956	152	[1.032]		129/128	0.702	151	[1.068]		130/128	0.835
99	gi|313661476	spectrin beta chain, brain 1 [Gallus gallus]	3648	317822	144	120	61	51	28.6	5.37	0.96	Quantitation summary for protein	129/126	1.104	126	[1.051]		130/126	1.489	126	1.071	*	131/126	1.116	126	[1.047]		129/127	0.718	126	1.026	*	130/127	0.95	127	[1.027]		131/127	0.733	126	1.025	*	129/128	0.339	126	1.072	*	130/128	0.448
100	gi|53129426	hypothetical protein RCJMB04_5l9 [Gallus gallus]	3642	135451	127	99	41	31	44.3	5.14	2.54	Quantitation summary for protein	129/126	1.359	109	[1.113]		130/126	1.211	108	[1.175]		131/126	1.256	109	[1.117]		129/127	1.51	109	[1.058]		130/127	1.309	108	[1.059]		131/127	1.41	109	[1.043]		129/128	1.962	108	[1.126]		130/128	1.698
101	gi|363747068	PREDICTED: LOW QUALITY PROTEIN: transgelin-2-like [Gallus gallus]	3631	24921	163	133	22	18	82.9	9.03	194.16	Quantitation summary for protein	129/126	0.715	139	[1.092]		130/126	0.72	139	[1.133]		131/126	0.707	139	[1.103]		129/127	0.982	139	[1.056]		130/127	0.97	139	[1.071]		131/127	0.981	139	[1.047]		129/128	0.865	139	[1.109]		130/128	0.853
102	gi|259835	prepro-cathepsin D [Gallus gallus]	3604	49685	166	142	21	21	54	5.9	15.85	Quantitation summary for protein	129/126	0.827	158	[1.075]		130/126	0.669	158	[1.187]		131/126	1.115	158	1.097	*	129/127	0.707	158	1.08	*	130/127	0.561	158	[1.060]		131/127	0.962	158	[1.058]		129/128	2.074	153	[1.141]		130/128	1.647
103	gi|65322	heat shock protein 90 beta [Gallus gallus]	3528	101134	139	125	23	21	27	4.95	2.46	Quantitation summary for protein	129/126	1.471	19	[1.161]		130/126	1.621	19	[1.353]		131/126	1.492	19	[1.185]		129/127	1.159	19	[1.144]		130/127	1.253	19	[1.114]		131/127	1.187	19	[1.103]		129/128	1.204	19	[1.160]		130/128	1.241
104	gi|63560	unnamed protein product [Gallus gallus]	3524	77638	166	137	48	42	61.3	5.31	11	Quantitation summary for protein	129/126	0.847	137	[1.105]		130/126	1.372	139	[1.197]		131/126	0.801	138	[1.118]		129/127	0.528	138	1.076	*	130/127	0.839	140	[1.077]		131/127	0.504	139	1.074	*	129/128	1.36	128	1.123	*	130/128	2.172
105	gi|408500	beta-H globin [Gallus gallus]	3500	19219	199	149	16	16	80.3	9.2	394.05	Quantitation summary for protein	129/126	0.772	21	[1.140]		130/126	1.352	21	1.244	*	131/126	0.774	21	1.137	*	129/127	0.882	21	1.042	*	130/127	1.516	21	1.121	*	131/127	0.893	21	1.047	*	129/128	0.282	21	1.222	*	130/128	0.484
106	gi|115579	RecName: Full=F-actin-capping protein subunit alpha-2; AltName: Full=Beta-actinin subunit I; AltName: Full=CapZ 36/32	3424	38209	100	90	11	11	61.5	5.54	8.44	Quantitation summary for protein	129/126	0.869	79	[1.097]		130/126	1.29	79	[1.189]		131/126	0.871	78	[1.103]		129/127	0.769	78	[1.068]		130/127	1.13	76	1.051	*	131/127	0.779	77	[1.063]		129/128	1.003	76	[1.118]		130/128	1.504
107	gi|53126513	hypothetical protein RCJMB04_1d23 [Gallus gallus]	3354	28358	144	120	20	18	69.1	5.22	42.94	Quantitation summary for protein	129/126	1.013	127	[1.191]		130/126	0.998	124	[1.347]		131/126	0.938	127	[1.205]		129/127	1.017	128	[1.124]		130/127	0.981	125	[1.129]		131/127	0.951	128	[1.111]		129/128	2.165	121	[1.271]		130/128	2.1
108	gi|53127744	hypothetical protein RCJMB04_3d14 [Gallus gallus]	3351	59770	136	110	25	20	41.1	6.67	7.09	Quantitation summary for protein	129/126	0.735	57	[1.126]		130/126	0.702	57	[1.233]		131/126	0.667	57	[1.145]		129/127	0.908	57	[1.048]		130/127	0.852	57	[1.080]		131/127	0.832	57	1.045	*	129/128	1.06	57	[1.122]		130/128	0.992
109	gi|53126523	hypothetical protein RCJMB04_1e8 [Gallus gallus]	3278	33681	156	130	25	23	76.1	4.63	74.83	Quantitation summary for protein	129/126	1.264	115	[1.084]		130/126	1.561	114	[1.142]		131/126	1.179	115	[1.082]		129/127	0.989	117	[1.049]		130/127	1.203	116	[1.070]		131/127	0.931	117	[1.044]		129/128	0.872	115	[1.141]		130/128	1.06
110	gi|211107	alpha-tropomyosin [Gallus gallus]	3275	41969	215	168	48	40	85.2	4.7	186.17	Quantitation summary for protein	129/126	---	0	---		130/126	---	0	---		131/126	---	0	---		129/127	---	0	---		130/127	---	0	---		131/127	---	0	---		129/128	---	0	---		130/128	---
111	gi|118104602	PREDICTED: alpha-aminoadipic semialdehyde dehydrogenase isoform 2 [Gallus gallus]	3232	64947	92	86	23	22	47.9	7.04	4.63	Quantitation summary for protein	129/126	1.22	90	[1.084]		130/126	1.274	90	[1.134]		131/126	1.101	90	[1.100]		129/127	0.965	90	1.053	*	130/127	0.987	90	1.037	*	131/127	0.879	90	1.04	*	129/128	1.562	90	1.091	*	130/128	1.597
112	gi|363736263	PREDICTED: tubulin alpha-4A chain-like [Gallus gallus]	3206	57484	132	108	24	22	55.7	5.09	9.95	Quantitation summary for protein	129/126	1.111	13	1.207		130/126	0.939	13	1.245		131/126	0.979	13	1.213		129/127	1.566	13	1.096	*	130/127	1.297	13	1.123	*	131/127	1.392	13	1.117	*	129/128	1.308	13	1.103	*	130/128	1.082
113	gi|63227	unnamed protein product [Gallus gallus]	3156	49316	122	104	21	20	53.5	5.93	11.5	Quantitation summary for protein	129/126	0.996	103	[1.126]		130/126	0.803	101	[1.243]		131/126	0.821	102	[1.132]		129/127	1.255	102	1.085	*	130/127	0.988	102	[1.133]		131/127	1.046	101	[1.067]		129/128	1.835	102	[1.162]		130/128	1.444
114	gi|515694	tropomyosin [Gallus gallus]	3150	33572	173	129	37	31	76.2	4.65	261.35	Quantitation summary for protein	129/126	1.482	34	[1.227]		130/126	2.261	33	[1.504]		131/126	1.396	34	[1.257]		129/127	0.778	33	[1.174]		130/127	1.151	32	[1.120]		131/127	0.747	33	[1.118]		129/128	1.741	33	1.208	*	130/128	2.565
115	gi|755815	complement C3 precursor [Gallus gallus]	3118	210718	138	122	49	43	29.4	6.69	1.59	Quantitation summary for protein	129/126	1.211	118	[1.063]		130/126	1.158	118	[1.089]		131/126	1.088	118	[1.065]		129/127	0.825	118	1.033	*	130/127	0.773	118	[1.032]		131/127	0.748	118	1.028	*	129/128	0.995	118	[1.065]		130/128	0.932
116	gi|60098585	hypothetical protein RCJMB04_3n20 [Gallus gallus]	3098	69586	144	123	36	31	66	5.53	9.5	Quantitation summary for protein	129/126	1.082	131	1.058	*	130/126	1.109	131	[1.116]		131/126	1.037	131	[1.069]		129/127	1.021	130	[1.041]		130/127	1.026	130	[1.043]		131/127	0.989	130	[1.034]		129/128	0.977	130	[1.085]		130/128	0.981
117	gi|6179570	radixin [Gallus gallus]	3096	83522	172	123	37	31	49.4	6.11	8.34	Quantitation summary for protein	129/126	0.868	77	[1.074]		130/126	0.746	77	[1.126]		131/126	0.801	77	[1.082]		129/127	1.122	77	[1.039]		130/127	0.946	77	1.036	*	131/127	1.045	77	1.029	*	129/128	1.649	75	[1.102]		130/128	1.392
118	gi|21435808	translational eukaryotic inititation factor 4AII [Gallus gallus]	3093	51841	132	113	25	22	53.3	5.33	13.15	Quantitation summary for protein	129/126	1.662	112	[1.119]		130/126	1.838	113	[1.216]		131/126	1.539	113	[1.126]		129/127	1.126	114	[1.068]		130/127	1.222	115	[1.086]		131/127	1.052	115	[1.059]		129/128	1.221	114	1.199	*	130/128	1.325
119	gi|3822553	nuclear calmodulin-binding protein [Gallus gallus]	3091	92031	131	105	29	29	40.4	4.68	3.66	Quantitation summary for protein	129/126	0.874	61	[1.057]		130/126	0.835	60	1.095	*	131/126	0.827	59	1.06	*	129/127	1.043	61	[1.042]		130/127	0.977	60	1.04	*	131/127	0.998	59	1.035		129/128	0.909	60	1.136	*	130/128	0.852
120	gi|363742430	PREDICTED: adenylyl cyclase-associated protein 1 [Gallus gallus]	3082	66834	172	148	28	26	47.1	8.2	12.35	Quantitation summary for protein	129/126	1.073	158	[1.105]		130/126	1.067	158	[1.163]		131/126	1.044	158	[1.125]		129/127	0.952	161	[1.058]		130/127	0.929	161	[1.051]		131/127	0.935	161	[1.044]		129/128	1.119	161	[1.130]		130/128	1.091
121	gi|62851	unnamed protein product [Gallus gallus]	3081	46692	152	124	33	26	68.1	6.92	22.07	Quantitation summary for protein	129/126	1.55	133	[1.067]		130/126	1.42	133	[1.106]		131/126	1.184	132	1.062	*	129/127	1.588	135	[1.044]		130/127	1.427	135	[1.046]		131/127	1.229	135	1.028	*	129/128	1.75	136	[1.102]		130/128	1.571
122	gi|363735591	PREDICTED: eukaryotic translation initiation factor 3 subunit A [Gallus gallus]	3075	185080	146	120	54	45	34.9	6.74	1.62	Quantitation summary for protein	129/126	1.051	127	[1.050]		130/126	1.232	127	[1.082]		131/126	1.058	127	[1.054]		129/127	1.015	127	1.027	*	130/127	1.166	127	[1.039]		131/127	1.032	127	1.027	*	129/128	0.624	127	[1.060]		130/128	0.717
123	gi|806554	actin-like protein [Gallus gallus]	3070	51146	139	114	22	16	47.5	6.3	6.84	Quantitation summary for protein	129/126	0.758	112	[1.062]		130/126	0.778	112	[1.099]		131/126	0.695	112	[1.068]		129/127	0.837	112	[1.033]		130/127	0.843	112	[1.034]		131/127	0.775	112	1.031	*	129/128	0.849	112	[1.066]		130/128	0.854
124	gi|118082784	PREDICTED: probable ATP-dependent RNA helicase DDX17 [Gallus gallus]	3061	81242	124	113	32	27	44.6	8.85	5.42	Quantitation summary for protein	129/126	0.93	81	[1.155]		130/126	0.837	81	[1.232]		131/126	0.865	81	[1.170]		129/127	1.045	83	[1.088]		130/127	0.925	83	[1.079]		131/127	0.982	83	[1.067]		129/128	0.997	83	[1.196]		130/128	0.881
125	gi|135472	RecName: Full=Tubulin beta-6 chain; AltName: Full=Beta-tubulin class-VI	3059	53900	162	133	18	15	43.5	4.96	15.2	Quantitation summary for protein	129/126	0.749	26	1.071	*	130/126	0.872	26	1.11	*	131/126	0.599	26	1.084	*	129/127	1.079	26	1.053	*	130/127	1.231	26	1.062	*	131/127	0.871	26	1.049	*	129/128	0.729	26	[1.126]		130/128	0.831
126	gi|44969651	calreticulin [Gallus gallus]	3057	56017	166	127	34	27	66.6	4.41	18.44	Quantitation summary for protein	129/126	1.126	138	[1.235]		130/126	1.083	138	[1.493]		131/126	1.386	138	[1.255]		129/127	1.696	142	[1.161]		130/127	1.6	142	[1.151]		131/127	2.109	142	[1.139]		129/128	2.251	139	[1.433]		130/128	2.124
127	gi|53132642	hypothetical protein RCJMB04_13l7 [Gallus gallus]	3041	87097	174	147	44	37	48.5	4.96	8.51	Quantitation summary for protein	129/126	1.124	160	[1.069]		130/126	0.812	160	[1.109]		131/126	1.063	160	[1.078]		129/127	1.885	159	[1.046]		130/127	1.336	159	[1.041]		131/127	1.8	159	1.038	*	129/128	2.371	159	1.107	*	130/128	1.679
128	gi|517085	alpha-actinin [Gallus gallus]	3032	117087	105	90	39	32	48.1	5.13	2.86	Quantitation summary for protein	129/126	0.735	63	[1.096]		130/126	0.888	63	[1.163]		131/126	0.752	63	[1.108]		129/127	0.618	63	1.073	*	130/127	0.732	63	1.047	*	131/127	0.639	63	1.069	*	129/128	0.508	63	1.108	*	130/128	0.601
129	gi|53130422	hypothetical protein RCJMB04_7l20 [Gallus gallus]	3026	80519	169	140	36	31	52.1	9.52	7.31	Quantitation summary for protein	129/126	1.08	80	[1.057]		130/126	1.027	80	[1.108]		131/126	1.038	79	[1.070]		129/127	1.257	79	[1.050]		130/127	1.171	79	[1.027]		131/127	1.219	79	[1.038]		129/128	1.324	80	[1.113]		130/128	1.232
130	gi|53126268	hypothetical protein RCJMB04_1b22 [Gallus gallus]	3023	65747	130	106	26	22	46.6	4.74	5.08	Quantitation summary for protein	129/126	0.84	113	[1.102]		130/126	0.988	113	[1.174]		131/126	0.919	113	[1.122]		129/127	1.059	115	[1.054]		130/127	1.263	115	[1.074]		131/127	1.165	115	[1.048]		129/128	0.832	114	[1.121]		130/128	0.994
131	gi|127513	RecName: Full=Ig mu chain C region	2993	52723	146	116	13	11	30.5	6.07	6.39	Quantitation summary for protein	129/126	1.405	126	1.091	*	130/126	1.225	126	[1.103]		131/126	2.32	126	1.115	*	129/127	1.812	127	1.06	*	130/127	1.55	127	[1.055]		131/127	3.023	127	1.078	*	129/128	1.456	128	[1.076]		130/128	1.247
132	gi|53127382	hypothetical protein RCJMB04_2b5 [Gallus gallus]	2976	70910	115	98	26	24	51.8	5.66	4.1	Quantitation summary for protein	129/126	0.959	103	[1.058]		130/126	0.848	103	[1.105]		131/126	0.908	102	1.061	*	129/127	1.102	104	1.044	*	130/127	0.956	104	[1.042]		131/127	1.054	103	1.035	*	129/128	1.073	104	[1.096]		130/128	0.929
133	gi|212813	tropomyosin (CTm4) [Gallus gallus]	2976	41419	235	169	49	39	85.9	4.73	215.47	Quantitation summary for protein	129/126	0.745	23	1.147	*	130/126	0.881	22	1.262	*	131/126	0.93	23	1.163	*	129/127	0.674	23	1.144	*	130/127	1.076	23	[1.151]		131/127	0.849	23	1.083	*	129/128	0.801	23	1.329	*	130/128	1.279
134	gi|600254	caldesmon [Gallus gallus]	2945	74365	153	123	41	32	56.7	8.52	7.66	Quantitation summary for protein	129/126	---	1	---		130/126	---	1	---		131/126	---	1	---		129/127	---	1	---		130/127	---	1	---		131/127	---	1	---		129/128	---	1	---		130/128	---
135	gi|211384	non-muscle caldesmon [Gallus gallus]	2921	75599	153	122	41	31	55.3	8.11	7.02	Quantitation summary for protein	129/126	---	0	---		130/126	---	0	---		131/126	---	0	---		129/127	---	0	---		130/127	---	0	---		131/127	---	0	---		129/128	---	0	---		130/128	---
136	gi|27465053	alpha-tropomyosin 2 [Gallus gallus]	2920	40868	197	153	43	38	84.2	4.65	133.83	Quantitation summary for protein	129/126	0.779	5	1.298		130/126	1.478	5	[1.601]		131/126	0.96	5	1.288		129/127	0.613	5	1.237	*	130/127	1.14	5	1.26		131/127	0.763	5	[1.225]		129/128	0.612	5	1.718		130/128	1.138
137	gi|211139	anchorin CII [Gallus gallus]	2918	41560	165	137	39	34	82.9	5.6	66.63	Quantitation summary for protein	129/126	0.889	149	[1.169]		130/126	1.104	149	[1.249]		131/126	0.803	149	[1.185]		129/127	0.948	151	[1.056]		130/127	1.157	151	[1.081]		131/127	0.865	151	[1.053]		129/128	1.321	143	[1.132]		130/128	1.619
138	gi|3645997	apolipoprotein AIV [Gallus gallus]	2916	44495	92	81	26	25	68.3	4.8	10.4	Quantitation summary for protein	129/126	0.986	83	[1.062]		130/126	1.271	82	[1.113]		131/126	0.989	83	[1.076]		129/127	1.084	81	1.032	*	130/127	1.371	81	[1.051]		131/127	1.099	81	[1.030]		129/128	1.28	81	1.088	*	130/128	1.616
139	gi|211896	h-caldesmon [Gallus gallus]	2901	114933	154	121	41	30	38.1	5.56	2.96	Quantitation summary for protein	129/126	0.671	2	1.365		130/126	1.643	2	1.581		131/126	1.049	2	1.41		129/127	0.409	2	1.269		130/127	0.982	2	1.095		131/127	0.646	2	1.229		129/128	0.652	2	1.22		130/128	1.564
140	gi|238786	5-aminoimidazole-4-carboxamide-ribonucleotide transformylase-IMP cyclohydrolase [Gallus gallus]	2897	73596	102	85	34	31	62.7	8.4	9.1	Quantitation summary for protein	129/126	0.892	94	[1.123]		130/126	0.787	94	[1.194]		131/126	0.769	94	[1.133]		129/127	0.996	95	[1.061]		130/127	0.862	95	[1.060]		131/127	0.866	95	[1.055]		129/128	1.426	94	[1.129]		130/128	1.233
141	gi|53127294	hypothetical protein RCJMB04_1l5 [Gallus gallus]	2887	30449	148	130	17	16	47.1	6.46	7.84	Quantitation summary for protein	129/126	0.746	136	[1.079]		130/126	0.776	136	[1.146]		131/126	0.784	135	[1.084]		129/127	0.975	135	[1.049]		130/127	0.995	135	[1.054]		131/127	1.035	134	1.043	*	129/128	1.447	136	1.13	*	130/128	1.475
142	gi|53127458	hypothetical protein RCJMB04_2i3 [Gallus gallus]	2872	32633	117	96	22	21	65.3	4.68	42.78	Quantitation summary for protein	129/126	0.716	59	[1.177]		130/126	0.696	59	[1.287]		131/126	0.754	59	[1.183]		129/127	0.921	62	[1.063]		130/127	0.898	63	[1.080]		131/127	0.979	63	1.055	*	129/128	0.525	62	1.26	*	130/128	0.511
143	gi|1616990	enolase [Gallus gallus]	2871	56045	97	87	17	15	31.3	7.28	4.54	Quantitation summary for protein	129/126	1.13	88	1.096	*	130/126	3.396	88	[1.245]		131/126	0.832	88	[1.110]		129/127	1.457	86	1.07	*	130/127	4.291	86	[1.164]		131/127	1.082	85	1.042	*	129/128	1.629	86	[1.134]		130/128	4.802
144	gi|53133512	hypothetical protein RCJMB04_17g3 [Gallus gallus]	2851	70735	102	90	33	29	56.2	5.96	5.73	Quantitation summary for protein	129/126	0.996	95	[1.106]		130/126	0.877	95	[1.173]		131/126	0.928	95	[1.118]		129/127	1.14	95	[1.059]		130/127	0.984	95	[1.059]		131/127	1.074	95	[1.050]		129/128	1.144	95	[1.126]		130/128	0.986
145	gi|50800573	PREDICTED: 60S acidic ribosomal protein P2 [Gallus gallus]	2846	14356	122	102	13	12	98.3	4.42	602.15	Quantitation summary for protein	129/126	1.641	111	[1.107]		130/126	1.464	111	[1.234]		131/126	1.583	111	[1.125]		129/127	1.127	111	[1.093]		130/127	0.986	111	1.07	*	131/127	1.098	111	[1.064]		129/128	2.715	109	[1.181]		130/128	2.372
146	gi|53128824	hypothetical protein RCJMB04_5d11 [Gallus gallus]	2828	32587	125	103	19	18	58.2	4.76	52.14	Quantitation summary for protein	129/126	0.947	41	1.135	*	130/126	1.149	41	[1.287]		131/126	1.002	41	1.152		129/127	0.876	41	[1.117]		130/127	1.042	41	1.097	*	131/127	0.936	41	1.095	*	129/128	0.94	40	1.336		130/128	1.146
147	gi|15077081	actin related protein 3 [Gallus gallus]	2795	53347	140	123	23	22	59.3	5.62	8.16	Quantitation summary for protein	129/126	0.753	60	[1.112]		130/126	0.652	59	[1.221]		131/126	0.678	60	[1.133]		129/127	0.917	60	[1.065]		130/127	0.774	59	[1.065]		131/127	0.834	60	1.047	*	129/128	1.124	60	[1.110]		130/128	0.946
148	gi|60098851	hypothetical protein RCJMB04_12o19 [Gallus gallus]	2769	65258	89	82	17	14	39.8	8.01	2.59	Quantitation summary for protein	129/126	0.934	85	[1.040]		130/126	0.813	85	[1.076]		131/126	0.821	85	[1.045]		129/127	1.067	85	[1.038]		130/127	0.911	85	1.03	*	131/127	0.947	85	1.031	*	129/128	1.419	84	[1.077]		130/128	1.21
149	gi|8670805	T-complex protein 1 delta subunit [Gallus gallus]	2768	67667	108	90	26	22	56.3	7.94	7.04	Quantitation summary for protein	129/126	0.861	95	[1.107]		130/126	0.795	95	[1.178]		131/126	0.792	95	[1.124]		129/127	1.044	95	[1.054]		130/127	0.945	95	[1.050]		131/127	0.97	95	1.048	*	129/128	1.036	95	[1.105]		130/128	0.937
150	gi|60098495	hypothetical protein RCJMB04_3b17 [Gallus gallus]	2764	64397	91	77	14	13	39.7	9.35	3.03	Quantitation summary for protein	129/126	0.917	81	1.083	*	130/126	0.891	81	[1.135]		131/126	0.967	81	1.108	*	129/127	0.961	81	1.064	*	130/127	0.915	81	[1.058]		131/127	1.023	81	[1.110]		129/128	1.193	80	[1.131]		130/128	1.137
151	gi|363737146	PREDICTED: UDP-glucose:glycoprotein glucosyltransferase 1 [Gallus gallus]	2751	198409	108	94	35	32	29.7	5.32	1.08	Quantitation summary for protein	129/126	1.257	94	1.06	*	130/126	1.218	93	[1.084]		131/126	1.241	95	[1.066]		129/127	1.025	93	[1.042]		130/127	0.973	93	1.029	*	131/127	1.022	94	[1.033]		129/128	0.856	93	[1.062]		130/128	0.812
152	gi|3688784	homogenin [Gallus gallus]	2742	98266	108	83	28	21	37.1	5.93	2.48	Quantitation summary for protein	129/126	0.835	91	1.059	*	130/126	0.728	91	[1.108]		131/126	0.683	91	1.074	*	129/127	1.147	91	1.046	*	130/127	0.981	91	[1.045]		131/127	0.948	91	[1.045]		129/128	1.356	91	[1.105]		130/128	1.158
153	gi|603789	450 kDa protein [Gallus gallus]	2734	52269	75	70	18	15	44.1	5.52	2.84	Quantitation summary for protein	129/126	1.192	5	1.031	*	130/126	2.053	5	1.095	*	131/126	1.131	5	1.015	*	129/127	0.639	5	1.07	*	130/127	1.08	5	1.046	*	131/127	0.612	5	1.093	*	129/128	0.168	4	1.027	*	130/128	0.258
154	gi|50745031	PREDICTED: protein disulfide-isomerase A6 isoform 2 [Gallus gallus]	2720	56719	99	84	20	17	41.8	5.02	5.08	Quantitation summary for protein	129/126	1.239	88	[1.111]		130/126	0.977	88	[1.178]		131/126	1.164	88	[1.127]		129/127	1.697	88	1.069	*	130/127	1.323	87	1.065	*	131/127	1.609	88	1.057	*	129/128	1.771	87	[1.149]		130/128	1.368
155	gi|53133820	hypothetical protein RCJMB04_20k5 [Gallus gallus]	2718	68091	104	87	30	27	59.8	6.36	7.75	Quantitation summary for protein	129/126	0.998	96	[1.124]		130/126	0.957	95	[1.178]		131/126	0.961	95	[1.140]		129/127	1.03	96	1.057	*	130/127	0.968	95	[1.061]		131/127	1.002	95	1.046		129/128	1.19	96	[1.116]		130/128	1.118
156	gi|53136370	hypothetical protein RCJMB04_27o18 [Gallus gallus]	2703	50546	138	104	28	21	62.4	9.05	22.6	Quantitation summary for protein	129/126	0.722	102	[1.157]		130/126	0.891	103	[1.252]		131/126	0.855	102	[1.172]		129/127	0.802	106	1.098	*	130/127	0.969	110	[1.099]		131/127	0.957	106	[1.084]		129/128	0.964	102	[1.166]		130/128	1.163
157	gi|732996	pre-fibrinogen alpha-E subunit [Gallus gallus]	2684	93096	87	75	20	16	27.5	5.69	1.63	Quantitation summary for protein	129/126	1.372	77	[1.104]		130/126	1.323	77	[1.164]		131/126	1.114	77	[1.131]		129/127	1.666	77	1.066	*	130/127	1.576	77	[1.063]		131/127	1.366	77	[1.058]		129/128	1.691	77	[1.082]		130/128	1.598
158	gi|60098911	hypothetical protein RCJMB04_15d24 [Gallus gallus]	2683	112852	111	100	36	33	49.9	5.28	2.83	Quantitation summary for protein	129/126	1.147	89	[1.076]		130/126	1.105	89	[1.096]		131/126	1.124	89	[1.081]		129/127	1.152	89	[1.044]		130/127	1.088	90	[1.039]		131/127	1.14	89	[1.042]		129/128	0.738	90	[1.087]		130/128	0.696
159	gi|24637100	aconitase precursor [Gallus gallus]	2682	99827	101	79	28	23	38.7	8.05	2.41	Quantitation summary for protein	129/126	0.981	88	[1.065]		130/126	0.95	88	1.093	*	131/126	0.859	88	1.063	*	129/127	0.979	88	[1.040]		130/127	0.93	88	1.041	*	131/127	0.865	88	[1.043]		129/128	0.807	88	[1.128]		130/128	0.766
160	gi|53134709	hypothetical protein RCJMB04_23k2 [Gallus gallus]	2679	55703	97	89	25	25	61.6	5.11	9.52	Quantitation summary for protein	129/126	1.09	92	[1.096]		130/126	1.147	92	[1.168]		131/126	1.032	92	[1.105]		129/127	1.098	92	[1.054]		130/127	1.139	91	1.049	*	131/127	1.049	92	[1.044]		129/128	1.303	92	[1.114]		130/128	1.343
161	gi|3342404	lactate dehydrogenase H subunit [Gallus gallus]	2636	42652	130	108	21	19	50.2	7.07	9.12	Quantitation summary for protein	129/126	1.1	103	[1.134]		130/126	1.252	103	[1.182]		131/126	1.006	103	[1.147]		129/127	0.735	103	[1.051]		130/127	0.821	104	[1.073]		131/127	0.678	104	[1.077]		129/128	0.548	103	[1.183]		130/128	0.608
162	gi|212807	alpha-tropomyosin (smooth muscle) [Gallus gallus]	2631	40911	177	122	46	34	81.3	4.68	112.95	Quantitation summary for protein	129/126	0.884	26	1.131	*	130/126	1.484	26	1.299	*	131/126	1.09	26	1.144	*	129/127	0.496	26	1.108	*	130/127	0.816	26	[1.077]		131/127	0.617	26	[1.090]		129/128	0.973	26	1.167		130/128	1.6
163	gi|53136806	hypothetical protein RCJMB04_34c21 [Gallus gallus]	2619	64847	113	97	36	31	55.2	5.02	7.81	Quantitation summary for protein	129/126	1.445	101	[1.076]		130/126	1.266	101	[1.146]		131/126	1.243	101	[1.084]		129/127	1.49	101	1.045	*	130/127	1.28	101	[1.053]		131/127	1.294	101	1.035	*	129/128	2.494	101	1.145	*	130/128	2.14
164	gi|1763015	ubiquitin/ribosomal protein [Gallus gallus]	2611	24268	173	114	19	12	75	9.68	10.57	Quantitation summary for protein	129/126	1.781	43	[1.227]		130/126	2.143	43	[1.413]		131/126	1.295	43	[1.238]		129/127	0.977	43	1.091		130/127	1.153	43	[1.141]		131/127	0.718	43	1.095	*	129/128	1.695	43	[1.194]		130/128	1.998
165	gi|53134324	hypothetical protein RCJMB04_23a9 [Gallus gallus]	2607	42040	70	66	12	11	43.4	8.87	3.21	Quantitation summary for protein	129/126	0.941	64	[1.082]		130/126	0.842	65	[1.112]		131/126	0.809	64	[1.091]		129/127	1.237	65	1.037	*	130/127	1.085	66	1.033	*	131/127	1.073	65	1.033	*	129/128	2.02	64	[1.062]		130/128	1.771
166	gi|50752104	PREDICTED: septin-2 [Gallus gallus]	2592	48085	92	84	21	20	68.2	5.91	8.55	Quantitation summary for protein	129/126	1.084	47	[1.186]		130/126	1.063	47	[1.246]		131/126	1.037	46	[1.211]		129/127	0.819	46	1.09	*	130/127	0.789	46	[1.067]		131/127	0.792	46	1.072	*	129/128	1.296	47	1.124	*	130/128	1.245
167	gi|62972	proteasome C1 subunit [Gallus gallus]	2592	23565	69	64	11	10	78.4	9	9.95	Quantitation summary for protein	129/126	1.004	66	1.115		130/126	1.053	66	1.171	*	131/126	0.974	66	1.129		129/127	0.975	68	[1.070]		130/127	1.003	68	1.061		131/127	0.954	68	1.049	*	129/128	1.533	67	[1.124]		130/128	1.576
168	gi|53133536	hypothetical protein RCJMB04_17k12 [Gallus gallus]	2585	77928	114	103	27	22	41.2	6.48	2.74	Quantitation summary for protein	129/126	1.518	105	[1.081]		130/126	1.571	105	[1.115]		131/126	1.273	105	[1.087]		129/127	1.027	106	[1.047]		130/127	1.043	106	1.037	*	131/127	0.87	105	[1.046]		129/128	0.551	105	[1.108]		130/128	0.559
169	gi|2281033	vigilin [Gallus gallus]	2561	169170	143	103	49	41	35.3	6.74	2.15	Quantitation summary for protein	129/126	1.86	123	[1.068]		130/126	1.211	123	[1.086]		131/126	1.582	123	1.067	*	129/127	1.874	123	1.049	*	130/127	1.16	124	[1.042]		131/127	1.56	124	[1.039]		129/128	1.433	123	[1.100]		130/128	0.914
170	gi|63556	unnamed protein product [Gallus gallus]	2561	82286	125	90	44	37	52.8	6.5	6.63	Quantitation summary for protein	129/126	0.84	98	[1.078]		130/126	1.628	98	[1.142]		131/126	0.919	98	[1.088]		129/127	0.46	98	1.053	*	130/127	0.874	98	[1.047]		131/127	0.508	98	[1.045]		129/128	1.33	98	1.08	*	130/128	2.524
171	gi|1680387	arginine-specific ADP-ribosyltransferase target protein; p33 [Gallus gallus]	2532	25148	92	83	13	10	66.5	9.04	12.66	Quantitation summary for protein	129/126	---	1	---		130/126	---	0	---		131/126	---	1	---		129/127	---	0	---		130/127	---	0	---		131/127	---	0	---		129/128	---	0	---		130/128	---
172	gi|53133522	hypothetical protein RCJMB04_17i9 [Gallus gallus]	2516	101336	112	88	28	24	38.9	5.68	2.04	Quantitation summary for protein	129/126	1.069	84	[1.084]		130/126	1.525	83	1.123	*	131/126	1.537	84	[1.086]		129/127	0.568	84	1.066	*	130/127	0.799	84	1.043	*	131/127	0.829	84	[1.051]		129/128	0.301	84	1.111	*	130/128	0.423
173	gi|17221616	nuclear protein matrin 3 [Gallus gallus]	2493	117893	115	90	33	25	35.9	5.79	2.24	Quantitation summary for protein	129/126	1.096	103	1.063	*	130/126	1.49	103	[1.102]		131/126	1.123	102	1.067	*	129/127	0.903	105	[1.036]		130/127	1.205	105	[1.033]		131/127	0.932	104	1.033	*	129/128	0.496	105	[1.107]		130/128	0.661
174	gi|18252632	zipcode-binding protein [Gallus gallus]	2487	88613	117	98	33	30	40.7	6.46	3.6	Quantitation summary for protein	129/126	0.893	104	[1.064]		130/126	0.782	104	[1.087]		131/126	0.961	104	[1.076]		129/127	0.996	104	[1.048]		130/127	0.855	104	[1.044]		131/127	1.083	104	[1.050]		129/128	0.95	104	[1.080]		130/128	0.815
175	gi|363731145	PREDICTED: uncharacterized protein LOC769368 [Gallus gallus]	2468	89756	72	62	12	12	23.3	4.88	1.36	Quantitation summary for protein	129/126	0.924	51	1.101	*	130/126	0.646	51	[1.178]		131/126	0.749	51	[1.110]		129/127	1.673	51	1.126	*	130/127	1.146	51	[1.127]		131/127	1.37	51	[1.120]		129/128	2.472	50	1.206	*	130/128	1.689
176	gi|53128989	hypothetical protein RCJMB04_5f14 [Gallus gallus]	2465	24189	153	118	19	16	76.4	8.09	260.51	Quantitation summary for protein	129/126	0.761	119	[1.096]		130/126	0.756	119	[1.197]		131/126	0.721	119	[1.098]		129/127	0.907	121	[1.058]		130/127	0.885	122	1.08	*	131/127	0.869	121	[1.059]		129/128	0.883	122	1.285	*	130/128	0.86
177	gi|363737203	PREDICTED: eukaryotic translation initiation factor 4 gamma 1 [Gallus gallus]	2457	206662	115	98	40	32	23.5	5.24	0.9	Quantitation summary for protein	129/126	1.191	90	[1.069]		130/126	1.208	91	[1.110]		131/126	1.229	91	[1.075]		129/127	1.271	91	1.049	*	130/127	1.265	92	[1.053]		131/127	1.324	92	1.043	*	129/128	0.599	91	[1.098]		130/128	0.595
178	gi|138533	RecName: Full=Vimentin	2456	58667	129	106	34	33	55.7	5.09	11.28	Quantitation summary for protein	129/126	1.039	14	1.106		130/126	2.355	14	1.172	*	131/126	1.11	14	1.077	*	129/127	0.374	14	1.111	*	130/127	0.83	14	1.138	*	131/127	0.434	13	1.092	*	129/128	0.716	14	1.208	*	130/128	1.589
179	gi|53128146	hypothetical protein RCJMB04_4j7 [Gallus gallus]	2455	48129	80	72	19	18	51.4	8.02	7.32	Quantitation summary for protein	129/126	1.281	79	[1.094]		130/126	1.388	78	[1.100]		131/126	1.267	77	1.068	*	129/127	1.006	76	[1.053]		130/127	1.067	76	[1.039]		131/127	1.003	76	[1.044]		129/128	1.059	76	1.132	*	130/128	1.123
180	gi|468204	actin capping protein beta subunit, isoform 2 [Gallus gallus]	2452	36319	196	138	22	18	55.9	5.69	16.87	Quantitation summary for protein	129/126	0.83	161	[1.037]		130/126	0.923	161	[1.060]		131/126	0.782	161	1.039	*	129/127	0.802	161	[1.020]		130/127	0.875	161	[1.025]		131/127	0.763	161	[1.020]		129/128	0.883	161	[1.066]		130/128	0.963
181	gi|53130368	hypothetical protein RCJMB04_7e17 [Gallus gallus]	2452	84507	100	79	39	28	55.1	8.88	4.76	Quantitation summary for protein	129/126	0.925	90	[1.076]		130/126	1.136	90	[1.112]		131/126	0.94	89	[1.087]		129/127	0.946	89	1.046	*	130/127	1.139	89	[1.043]		131/127	0.971	89	[1.046]		129/128	0.898	89	1.089	*	130/128	1.082
182	gi|363737914	PREDICTED: talin-2 [Gallus gallus]	2440	312829	125	94	44	36	17.1	5.39	0.59	Quantitation summary for protein	129/126	0.981	50	1.067	*	130/126	1.017	50	[1.106]		131/126	1.044	50	1.072	*	129/127	0.897	50	1.048	*	130/127	0.912	49	1.034	*	131/127	0.964	50	1.038	*	129/128	0.428	50	[1.123]		130/128	0.435
183	gi|60099049	hypothetical protein RCJMB04_21c16 [Gallus gallus]	2419	14850	96	72	18	15	93.9	5.07	258.67	Quantitation summary for protein	129/126	0.696	78	[1.168]		130/126	0.674	78	[1.260]		131/126	0.656	77	[1.174]		129/127	1.088	79	1.076	*	130/127	1.033	78	1.07	*	131/127	1.037	77	1.07	*	129/128	2.404	77	1.198	*	130/128	2.282
184	gi|8163560	vacuolar H-ATPase B subunit osteoclast isozyme, partial [Gallus gallus]	2416	60399	91	82	24	22	54.2	5.5	5.07	Quantitation summary for protein	129/126	1.01	85	1.103		130/126	0.935	86	1.175	*	131/126	0.93	86	1.116	*	129/127	1.131	84	[1.075]		130/127	1.026	85	1.056	*	131/127	1.051	85	[1.063]		129/128	1.115	84	[1.147]		130/128	1.01
185	gi|50732309	PREDICTED: kinesin-1 heavy chain [Gallus gallus]	2415	133560	84	75	36	32	41	6.06	1.76	Quantitation summary for protein	129/126	1.099	60	1.056	*	130/126	1.096	60	[1.090]		131/126	1.095	60	[1.056]		129/127	0.992	60	1.03	*	130/127	0.97	60	[1.041]		131/127	0.998	60	[1.031]		129/128	0.583	60	[1.090]		130/128	0.569
186	gi|53136418	hypothetical protein RCJMB04_28l17 [Gallus gallus]	2404	124178	103	93	32	29	39.9	5.7	2.06	Quantitation summary for protein	129/126	1.153	95	1.076	*	130/126	1.421	97	[1.121]		131/126	1.597	94	1.087	*	129/127	0.848	95	[1.036]		130/127	1.047	97	[1.043]		131/127	1.185	95	1.037	*	129/128	0.324	96	[1.092]		130/128	0.4
187	gi|211813	SM22 [Gallus gallus]	2404	26711	91	78	19	17	77	8.85	76.3	Quantitation summary for protein	129/126	1.082	77	[1.137]		130/126	1.218	77	[1.229]		131/126	1.12	77	[1.156]		129/127	0.787	77	1.067	*	130/127	0.869	77	[1.065]		131/127	0.822	77	1.054	*	129/128	1.264	75	[1.156]		130/128	1.397
188	gi|115592	RecName: Full=F-actin-capping protein subunit alpha-1; AltName: Full=Beta-actinin subunit I; AltName: Full=CapZ 36/32	2381	37923	89	76	14	13	57	5.43	5.84	Quantitation summary for protein	129/126	0.602	63	[1.113]		130/126	0.676	63	[1.233]		131/126	0.578	63	[1.141]		129/127	0.805	64	1.073	*	130/127	0.892	64	[1.063]		131/127	0.781	64	1.063	*	129/128	1.34	64	[1.138]		130/128	1.483
189	gi|322518671	RecName: Full=Adseverin; AltName: Full=Scinderin	2363	93427	95	83	25	23	38.1	5.53	2.34	Quantitation summary for protein	129/126	0.866	88	[1.048]		130/126	0.868	88	[1.079]		131/126	0.759	88	[1.055]		129/127	0.843	88	[1.039]		130/127	0.828	88	[1.035]		131/127	0.746	88	1.043	*	129/128	0.813	88	[1.072]		130/128	0.798
190	gi|53130364	hypothetical protein RCJMB04_7e11 [Gallus gallus]	2355	60403	105	91	33	29	57.1	9.02	11.09	Quantitation summary for protein	129/126	1.065	89	[1.141]		130/126	0.948	90	[1.224]		131/126	0.925	90	[1.143]		129/127	1.107	89	[1.084]		130/127	0.966	90	[1.117]		131/127	0.971	90	[1.065]		129/128	1.213	89	[1.169]		130/128	1.056
191	gi|53127378	hypothetical protein RCJMB04_2a21 [Gallus gallus]	2354	46558	72	70	14	13	52.4	6.12	4.55	Quantitation summary for protein	129/126	0.759	29	1.08	*	130/126	0.729	29	1.09	*	131/126	0.678	29	1.087	*	129/127	1.077	28	1.048	*	130/127	1.012	29	1.06		131/127	0.969	29	[1.060]		129/128	1.531	29	1.1	*	130/128	1.44
192	gi|45239430	annexin I [Gallus gallus]	2350	46782	89	81	23	20	67	7.05	6.74	Quantitation summary for protein	129/126	2.291	80	[1.101]		130/126	1.739	80	1.134	*	131/126	1.422	80	1.087	*	129/127	2.905	79	1.109	*	130/127	2.162	79	1.082	*	131/127	1.82	79	1.07	*	129/128	1.589	80	[1.152]		130/128	1.181
193	gi|118090250	PREDICTED: septin-11 [Gallus gallus]	2349	60672	109	88	25	20	45.4	6.53	5.68	Quantitation summary for protein	129/126	0.941	30	1.091	*	130/126	0.871	30	1.125	*	131/126	0.786	30	1.11	*	129/127	1.072	30	1.057	*	130/127	0.973	30	1.035	*	131/127	0.905	30	1.066	*	129/128	1.284	30	1.123	*	130/128	1.165
194	gi|118098353	PREDICTED: clathrin heavy chain 1 [Gallus gallus]	2334	214434	93	84	27	24	17.3	5.54	0.67	Quantitation summary for protein	129/126	1.226	6	1.32		130/126	1.099	6	1.306		131/126	1.357	6	1.399		129/127	1.169	6	1.193		130/127	1.027	6	1.175		131/127	1.307	6	1.261	*	129/128	0.775	5	1.115	*	130/128	0.392
195	gi|53136508	hypothetical protein RCJMB04_30b2 [Gallus gallus]	2326	62223	138	119	33	32	55.7	6.22	15.09	Quantitation summary for protein	129/126	0.976	113	[1.088]		130/126	0.966	114	[1.154]		131/126	0.897	113	[1.098]		129/127	0.805	114	[1.059]		130/127	0.781	116	1.047	*	131/127	0.747	114	[1.053]		129/128	0.612	114	[1.180]		130/128	0.593
196	gi|53128300	hypothetical protein RCJMB04_4l9 [Gallus gallus]	2321	63012	88	78	22	21	51.2	5.71	5.56	Quantitation summary for protein	129/126	1.318	85	[1.075]		130/126	1.155	85	[1.097]		131/126	1.161	84	[1.081]		129/127	1.109	85	1.04	*	130/127	0.953	85	[1.047]		131/127	0.986	84	[1.043]		129/128	1.388	84	1.067	*	130/128	1.191
197	gi|310772215	phosphatidylethanolamine-binding protein 1 [Gallus gallus]	2321	24781	84	67	13	10	88.8	6.96	13.29	Quantitation summary for protein	129/126	0.872	73	1.088	*	130/126	0.671	73	[1.160]		131/126	0.77	73	1.094	*	129/127	1.129	73	1.066	*	130/127	0.852	73	[1.071]		131/127	1.007	73	1.072		129/128	1.52	73	[1.136]		130/128	1.145
198	gi|363742292	PREDICTED: splicing factor, proline- and glutamine-rich [Gallus gallus]	2319	77206	110	82	29	23	49	9.49	3.86	Quantitation summary for protein	129/126	0.875	84	1.066	*	130/126	1.047	82	[1.118]		131/126	0.937	83	1.077	*	129/127	0.773	83	1.05	*	130/127	0.907	82	[1.046]		131/127	0.836	83	1.041	*	129/128	1.41	80	[1.092]		130/128	1.656
199	gi|118094989	PREDICTED: coatomer subunit beta~ [Gallus gallus]	2318	117227	102	88	32	29	34.8	5.11	2.09	Quantitation summary for protein	129/126	1.3	96	1.046	*	130/126	1.392	96	[1.084]		131/126	1.208	96	1.052	*	129/127	1.186	96	[1.047]		130/127	1.245	96	[1.031]		131/127	1.113	96	[1.034]		129/128	0.76	96	[1.082]		130/128	0.797
200	gi|65332	carbonic anhydrase [Gallus gallus]	2311	33284	88	78	14	14	56.2	6.56	9.75	Quantitation summary for protein	129/126	0.628	61	1.192	*	130/126	0.71	61	[1.349]		131/126	0.455	61	1.205	*	129/127	1.146	61	1.102	*	130/127	1.27	61	[1.110]		131/127	0.838	61	1.102	*	129/128	0.825	61	[1.366]		130/128	0.913
201	gi|363727685	PREDICTED: early endosome antigen 1 [Gallus gallus]	2309	202830	100	76	45	35	33.5	5.58	1.05	Quantitation summary for protein	129/126	1.144	81	1.056	*	130/126	1.144	82	[1.088]		131/126	1.007	82	[1.055]		129/127	0.964	82	1.031	*	130/127	0.945	83	[1.038]		131/127	0.857	83	[1.031]		129/128	0.622	82	[1.072]		130/128	0.609
202	gi|53135337	hypothetical protein RCJMB04_24o2 [Gallus gallus]	2298	53436	122	92	24	21	61.1	5.61	9.96	Quantitation summary for protein	129/126	1.928	111	1.112	*	130/126	1.169	110	[1.118]		131/126	2.174	111	[1.131]		129/127	2.744	110	[1.108]		130/127	1.626	109	[1.081]		131/127	3.125	110	[1.122]		129/128	2.195	109	[1.165]		130/128	1.302
203	gi|118088	RecName: Full=Peptidyl-prolyl cis-trans isomerase B; Short=PPIase B; AltName: Full=Cyclophilin B; AltName: Full=Rotamase B; AltName: Full=S-cyclophilin; Short=SCYLP; Flags: Precursor	2294	28185	96	77	20	16	70.5	9.4	34.65	Quantitation summary for protein	129/126	1.188	78	[1.149]		130/126	1.07	78	[1.246]		131/126	1.304	78	[1.168]		129/127	1.46	78	1.064	*	130/127	1.289	78	[1.077]		131/127	1.618	78	[1.061]		129/128	2.577	77	[1.167]		130/128	2.274
204	gi|15826593	Chain A, Covalent Glycosyl-Enzyme Intermediate Of Hen Egg White Lysozyme	2287	16363	65	59	8	8	74.4	9.46	23.71	Quantitation summary for protein	129/126	1.133	9	1.059	*	130/126	0.91	10	1.079	*	131/126	0.844	10	1.047	*	129/127	1.563	10	1.054	*	130/127	1.3	10	1.028	*	131/127	1.242	10	1.052	*	129/128	1.996	9	1.072	*	130/128	1.516
205	gi|60098743	hypothetical protein RCJMB04_7k22 [Gallus gallus]	2283	75107	118	88	34	27	59.4	8.42	5.84	Quantitation summary for protein	129/126	0.942	95	1.048	*	130/126	0.824	96	[1.087]		131/126	0.769	96	[1.079]		129/127	1.039	96	1.054	*	130/127	0.973	96	[1.052]		131/127	0.935	96	1.045	*	129/128	1.142	96	[1.099]		130/128	1.068
206	gi|53136648	hypothetical protein RCJMB04_32b9 [Gallus gallus]	2278	56303	79	69	22	18	47.9	5.44	5.17	Quantitation summary for protein	129/126	1.02	69	[1.111]		130/126	1.178	69	[1.170]		131/126	0.964	69	[1.109]		129/127	0.949	69	[1.085]		130/127	1.075	69	1.052	*	131/127	0.905	69	[1.056]		129/128	0.678	70	1.149	*	130/128	0.767
207	gi|53133756	hypothetical protein RCJMB04_20b9 [Gallus gallus]	2273	218646	114	98	49	42	29.7	7.86	1.07	Quantitation summary for protein	129/126	1.343	97	1.055	*	130/126	1.243	97	[1.088]		131/126	1.404	97	1.059	*	129/127	0.841	98	[1.060]		130/127	0.764	98	[1.053]		131/127	0.889	98	[1.055]		129/128	0.512	98	[1.094]		130/128	0.464
208	gi|2754696	high molecular mass nuclear antigen [Gallus gallus]	2269	121900	67	60	19	19	28.4	9.87	1.04	Quantitation summary for protein	129/126	0.624	63	[1.094]		130/126	0.484	63	1.127	*	131/126	0.658	63	[1.112]		129/127	1.274	63	1.095	*	130/127	0.969	63	1.085	*	131/127	1.357	63	1.099	*	129/128	1.945	62	[1.139]		130/128	1.479
209	gi|53127410	hypothetical protein RCJMB04_2d15 [Gallus gallus]	2263	81527	103	88	22	22	39.1	4.42	3.14	Quantitation summary for protein	129/126	1.292	96	1.115	*	130/126	1.281	96	[1.187]		131/126	1.123	96	1.116	*	129/127	1.309	97	1.061	*	130/127	1.273	97	[1.069]		131/127	1.15	97	1.047	*	129/128	0.845	97	[1.289]		130/128	0.821
210	gi|60098425	hypothetical protein RCJMB04_2a4 [Gallus gallus]	2261	79279	95	86	27	25	42.7	6.54	3.13	Quantitation summary for protein	129/126	1.161	85	[1.102]		130/126	1.131	85	[1.164]		131/126	1.194	85	[1.122]		129/127	1.038	85	[1.063]		130/127	0.991	85	[1.073]		131/127	1.077	85	[1.063]		129/128	0.859	85	[1.104]		130/128	0.819
211	gi|53126358	hypothetical protein RCJMB04_1c14 [Gallus gallus]	2240	72717	105	83	23	19	36.2	7.4	5.68	Quantitation summary for protein	129/126	1.291	94	1.071	*	130/126	1.408	94	[1.118]		131/126	1.133	94	[1.077]		129/127	1.051	94	[1.041]		130/127	1.124	94	[1.035]		131/127	0.928	93	1.032	*	129/128	0.864	94	[1.082]		130/128	0.924
212	gi|363747239	PREDICTED: drebrin-like [Gallus gallus]	2233	58065	79	67	19	17	41.3	5.14	4.23	Quantitation summary for protein	129/126	0.758	70	[1.118]		130/126	0.818	70	[1.141]		131/126	0.729	69	[1.101]		129/127	0.862	70	1.041	*	130/127	0.913	70	[1.049]		131/127	0.819	69	1.037	*	129/128	1.263	70	[1.132]		130/128	1.336
213	gi|363747261	PREDICTED: poly(rC)-binding protein 2-like isoform 1 [Gallus gallus]	2223	41418	79	64	14	13	51.1	7	5.82	Quantitation summary for protein	129/126	1.185	72	1.104	*	130/126	1.147	72	1.121	*	131/126	1.221	72	1.102	*	129/127	1.059	72	[1.086]		130/127	1.005	72	[1.076]		131/127	1.101	72	[1.084]		129/128	0.941	72	[1.165]		130/128	0.892
214	gi|289797	YB-1 protein [Gallus gallus]	2209	39673	101	77	12	12	42.4	9.85	8.44	Quantitation summary for protein	129/126	1.359	75	[1.144]		130/126	1.858	73	[1.271]		131/126	1.332	75	[1.146]		129/127	1.032	78	1.085	*	130/127	1.458	77	1.09	*	131/127	1.027	78	[1.084]		129/128	1.135	62	[1.216]		130/128	1.722
215	gi|53133360	hypothetical protein RCJMB04_15n8 [Gallus gallus]	2206	62658	109	88	27	24	60.6	5.52	3.64	Quantitation summary for protein	129/126	1.137	99	[1.068]		130/126	1.098	99	[1.120]		131/126	1.102	99	[1.078]		129/127	1.291	99	1.048	*	130/127	1.222	99	[1.046]		131/127	1.247	98	1.033	*	129/128	1.027	99	[1.157]		130/128	0.971
216	gi|53128363	hypothetical protein RCJMB04_4m1 [Gallus gallus]	2204	23195	54	50	6	5	32.1	9.73	11.96	Quantitation summary for protein	129/126	0.673	52	[1.106]		130/126	0.714	52	[1.173]		131/126	0.671	52	[1.122]		129/127	0.733	52	[1.063]		130/127	0.762	52	1.077	*	131/127	0.737	52	1.064	*	129/128	2.025	51	[1.215]		130/128	2.107
217	gi|60098647	hypothetical protein RCJMB04_4h16 [Gallus gallus]	2199	48769	102	84	28	24	63	4.72	10.28	Quantitation summary for protein	129/126	0.82	90	[1.169]		130/126	0.986	90	[1.322]		131/126	0.786	90	1.167	*	129/127	1.033	91	1.13	*	130/127	1.22	91	1.167	*	131/127	1	91	1.117		129/128	0.763	91	1.287	*	130/128	0.9
218	gi|363745002	PREDICTED: proliferation-associated protein 2G4 [Gallus gallus]	2197	56605	117	86	23	21	41	6.9	5.83	Quantitation summary for protein	129/126	1.33	100	[1.089]		130/126	1.553	100	[1.130]		131/126	1.313	100	[1.099]		129/127	0.927	100	1.039	*	130/127	1.061	100	[1.042]		131/127	0.924	100	[1.034]		129/128	1.106	100	[1.132]		130/128	1.263
219	gi|212393	myosin alkali light chain [Gallus gallus]	2187	19725	88	69	11	9	74.2	4.52	30.81	Quantitation summary for protein	129/126	1.012	5	1.124		130/126	1.336	5	1.283		131/126	0.874	4	1.054	*	129/127	0.949	4	1.089		130/127	1.279	5	1.276		131/127	0.975	5	1.21		129/128	0.901	5	1.162		130/128	1.165
220	gi|53130302	hypothetical protein RCJMB04_6o1 [Gallus gallus]	2186	42382	78	72	15	15	55.2	9.39	4.21	Quantitation summary for protein	129/126	0.891	58	[1.081]		130/126	1.03	58	[1.115]		131/126	0.903	57	1.084	*	129/127	0.978	57	1.056	*	130/127	1.095	58	1.056	*	131/127	0.994	58	[1.054]		129/128	1.06	57	1.071	*	130/128	1.201
221	gi|53133714	hypothetical protein RCJMB04_19j12 [Gallus gallus]	2185	127764	80	72	32	29	33.9	6.56	1.61	Quantitation summary for protein	129/126	1.029	68	1.07	*	130/126	1.142	68	1.113	*	131/126	0.995	68	1.07		129/127	0.9	68	[1.060]		130/127	0.984	69	[1.045]		131/127	0.879	68	1.049	*	129/128	0.664	68	[1.147]		130/128	0.722
222	gi|76443696	voltage-dependent anion-selective channel protein 1 [Gallus gallus]	2185	36474	62	57	16	14	68.9	6.85	7.04	Quantitation summary for protein	129/126	1.219	58	1.101	*	130/126	1.352	58	1.126	*	131/126	1.168	58	1.098	*	129/127	1.082	58	1.046	*	130/127	1.176	58	[1.045]		131/127	1.047	58	1.033	*	129/128	1.699	58	[1.117]		130/128	1.846
223	gi|363740107	PREDICTED: AP-1 complex subunit beta-1 [Gallus gallus]	2162	119735	70	60	28	25	34.8	4.93	1.5	Quantitation summary for protein	129/126	0.94	45	[1.107]		130/126	1.087	44	[1.122]		131/126	1.229	44	1.101	*	129/127	0.785	44	[1.086]		130/127	0.892	45	[1.068]		131/127	1.048	40	1.041	*	129/128	0.44	46	1.182	*	130/128	0.498
224	gi|212294	MHC B complex protein 12.3 [Gallus gallus]	2153	39636	78	67	19	18	59.9	7.6	7.04	Quantitation summary for protein	129/126	1.413	75	1.077	*	130/126	1.397	75	[1.119]		131/126	1.341	74	1.081	*	129/127	1.152	74	1.044	*	130/127	1.116	74	[1.042]		131/127	1.085	74	1.036	*	129/128	0.823	75	[1.115]		130/128	0.797
225	gi|263505112	RecName: Full=Peroxiredoxin-1	2151	27570	119	89	15	13	64.8	8.24	33.58	Quantitation summary for protein	129/126	0.792	100	[1.296]		130/126	0.739	100	[1.709]		131/126	0.689	100	[1.381]		129/127	0.911	100	[1.185]		130/127	0.834	100	[1.214]		131/127	0.801	100	[1.147]		129/128	1.5	98	[1.420]		130/128	1.378
226	gi|13434994	PIT 54 [Gallus gallus]	2149	57254	71	66	16	15	45.5	4.61	3.52	Quantitation summary for protein	129/126	1.419	67	1.089	*	130/126	1.11	67	1.142	*	131/126	1.16	67	1.09	*	129/127	1.661	67	[1.067]		130/127	1.274	67	1.062	*	131/127	1.371	67	1.048	*	129/128	2.13	67	[1.109]		130/128	1.632
227	gi|53127484	hypothetical protein RCJMB04_2j13 [Gallus gallus]	2148	56593	91	81	29	26	54.3	5.72	6.65	Quantitation summary for protein	129/126	0.945	79	[1.119]		130/126	0.812	79	[1.208]		131/126	0.857	79	[1.132]		129/127	1.163	80	[1.067]		130/127	0.983	80	[1.066]		131/127	1.066	80	1.047	*	129/128	1.115	80	[1.169]		130/128	0.942
228	gi|118094906	PREDICTED: serine/threonine-protein kinase PAK 2 isoform 2 [Gallus gallus]	2144	69253	87	80	23	21	51.8	5.57	4.06	Quantitation summary for protein	129/126	0.853	48	[1.107]		130/126	0.711	48	[1.151]		131/126	0.718	48	[1.095]		129/127	1.178	48	1.056	*	130/127	0.964	48	[1.060]		131/127	1.003	48	[1.056]		129/128	1.285	48	[1.115]		130/128	1.05
229	gi|132626770	heterogeneous nuclear ribonucleoprotein R [Gallus gallus]	2134	81574	105	81	29	24	42.7	8.4	3.65	Quantitation summary for protein	129/126	0.952	77	[1.104]		130/126	1.103	77	[1.167]		131/126	0.913	77	[1.111]		129/127	1.019	78	1.061	*	130/127	1.167	78	[1.057]		131/127	0.987	78	1.049	*	129/128	0.762	78	[1.193]		130/128	0.872
230	gi|53130866	hypothetical protein RCJMB04_10k5 [Gallus gallus]	2127	33500	116	90	19	18	64.3	5.39	21.54	Quantitation summary for protein	129/126	0.763	94	[1.120]		130/126	0.675	94	[1.200]		131/126	0.784	94	[1.144]		129/127	0.874	94	[1.100]		130/127	0.759	94	1.063	*	131/127	0.908	94	[1.080]		129/128	0.825	93	[1.224]		130/128	0.715
231	gi|53127346	hypothetical protein RCJMB04_1o16 [Gallus gallus]	2118	92937	79	68	24	21	38.9	5.68	1.83	Quantitation summary for protein	129/126	1.47	74	1.092	*	130/126	1.389	77	[1.155]		131/126	1.267	77	1.114	*	129/127	0.958	76	1.053	*	130/127	0.887	77	[1.056]		131/127	0.834	77	1.054	*	129/128	1.141	76	[1.109]		130/128	1.055
232	gi|53127965	hypothetical protein RCJMB04_4g21 [Gallus gallus]	2118	47476	57	54	13	12	43.2	5.09	2.58	Quantitation summary for protein	129/126	0.968	56	[1.083]		130/126	1.031	56	[1.127]		131/126	0.886	56	[1.084]		129/127	1.069	56	1.042	*	130/127	1.117	56	[1.053]		131/127	0.988	56	[1.053]		129/128	1.53	54	[1.115]		130/128	1.597
233	gi|50806608	PREDICTED: thioredoxin-like 1 [Gallus gallus]	2117	37086	62	58	13	12	50.9	4.94	6.8	Quantitation summary for protein	129/126	1.198	60	1.069	*	130/126	1.214	61	1.147	*	131/126	1.224	61	[1.078]		129/127	1.121	61	[1.075]		130/127	1.098	61	1.042	*	131/127	1.14	61	[1.068]		129/128	1.436	60	[1.126]		130/128	1.41
234	gi|363741727	PREDICTED: adenosylhomocysteinase A [Gallus gallus]	2115	101341	88	80	17	15	19.7	9.71	1.21	Quantitation summary for protein	129/126	0.991	82	[1.064]		130/126	0.843	82	[1.118]		131/126	0.765	82	1.074	*	129/127	1.11	82	[1.053]		130/127	0.926	82	1.035	*	131/127	0.866	82	1.041	*	129/128	1.089	82	[1.109]		130/128	0.907
235	gi|212395	myosin alkali light chain [Gallus gallus]	2114	19721	86	67	11	9	74.2	4.63	26.18	Quantitation summary for protein	129/126	1.221	3	1.338		130/126	0.877	3	1.329		131/126	0.955	3	1.352		129/127	1.518	3	1.123	*	130/127	1.069	3	1.159		131/127	1.199	3	1.043	*	129/128	1.329	3	1.111	*	130/128	0.936
236	gi|62899	glycinamide ribonucleotide synthetase-aminoimidazole ribonucleotide synthetase-glycinamide ribonucleotide transformylase [Gallus gallus]	2107	124289	75	63	26	22	28.4	7.51	1.42	Quantitation summary for protein	129/126	1.429	4	1.035	*	130/126	1.573	4	1.044	*	131/126	1.126	4	1.043	*	129/127	0.429	4	1.05	*	130/127	0.464	4	1.059	*	131/127	0.342	4	1.038	*	129/128	1.495	4	1.106	*	130/128	1.612
237	gi|363728718	PREDICTED: ATP synthase subunit O, mitochondrial isoform 2 [Gallus gallus]	2089	29191	75	63	16	14	61.6	9.85	13.87	Quantitation summary for protein	129/126	1.02	66	[1.092]		130/126	0.983	66	[1.144]		131/126	1.087	66	[1.103]		129/127	1.022	65	1.04	*	130/127	0.969	66	[1.056]		131/127	1.104	66	1.046	*	129/128	1.136	65	[1.085]		130/128	1.072
238	gi|33331366	phosphoglucomutase 1 [Gallus gallus]	2087	77376	77	67	25	22	45.3	8.98	2.62	Quantitation summary for protein	129/126	1.34	68	1.067	*	130/126	1.743	69	[1.125]		131/126	1.217	68	1.066	*	129/127	1.039	68	1.055	*	130/127	1.326	68	[1.063]		131/127	0.954	68	[1.043]		129/128	1.099	68	[1.150]		130/128	1.401
239	gi|53127660	hypothetical protein RCJMB04_2o2 [Gallus gallus]	2086	102431	86	76	27	23	31.2	5.07	1.65	Quantitation summary for protein	129/126	0.942	77	[1.070]		130/126	1.041	77	[1.141]		131/126	0.933	77	[1.083]		129/127	1.16	77	1.056	*	130/127	1.258	77	[1.059]		131/127	1.16	77	1.042	*	129/128	1.67	77	[1.109]		130/128	1.808
240	gi|363746971	PREDICTED: nuclear calmodulin-binding protein, partial [Gallus gallus]	2085	19291	73	63	16	16	75.2	9.19	64.26	Quantitation summary for protein	129/126	0.847	10	1.074	*	130/126	0.984	10	[1.104]		131/126	0.887	10	1.084	*	129/127	0.924	10	1.07	*	130/127	1.052	10	1.07	*	131/127	0.977	10	[1.087]		129/128	0.613	10	[1.215]		130/128	0.697
241	gi|53128909	hypothetical protein RCJMB04_5e15 [Gallus gallus]	2084	75446	84	75	27	23	38.9	9.05	2.9	Quantitation summary for protein	129/126	1.059	58	1.072	*	130/126	1.193	59	[1.157]		131/126	1.171	59	[1.096]		129/127	0.943	60	[1.059]		130/127	0.971	60	1.052	*	131/127	0.982	60	1.042	*	129/128	0.803	59	[1.106]		130/128	0.826
242	gi|60098401	hypothetical protein RCJMB04_1l3 [Gallus gallus]	2083	32517	59	57	13	12	51.6	3.8	6.7	Quantitation summary for protein	129/126	0.878	54	[1.106]		130/126	0.846	55	[1.154]		131/126	0.697	54	[1.118]		129/127	1.032	56	[1.080]		130/127	0.975	57	1.064	*	131/127	0.828	54	[1.084]		129/128	1.19	56	[1.228]		130/128	1.124
243	gi|363737087	PREDICTED: phosphatidylinositol-3,4,5-trisphosphate 5-phosphatase 1 isoform 2 [Gallus gallus]	2079	161890	101	89	35	33	32.5	7.58	1.31	Quantitation summary for protein	129/126	0.871	92	[1.063]		130/126	0.829	92	[1.117]		131/126	0.875	91	1.079	*	129/127	1.025	93	1.078	*	130/127	0.965	93	[1.057]		131/127	1.044	93	1.057	*	129/128	0.665	93	1.116	*	130/128	0.625
244	gi|397529551	ras-related protein Rab-1A [Gallus gallus]	2070	27046	76	61	19	17	77.6	5.93	21.99	Quantitation summary for protein	129/126	1.332	49	1.103	*	130/126	1.582	49	[1.199]		131/126	1.539	49	1.119	*	129/127	0.839	51	[1.061]		130/127	0.976	51	[1.078]		131/127	0.981	51	[1.050]		129/128	0.36	51	[1.172]		130/128	0.418
245	gi|60098883	hypothetical protein RCJMB04_14f6 [Gallus gallus]	2065	51981	71	56	17	12	42.8	7.86	3.95	Quantitation summary for protein	129/126	1.004	60	[1.193]		130/126	0.947	59	[1.241]		131/126	0.934	60	[1.207]		129/127	1.073	58	1.165	*	130/127	0.993	59	[1.149]		131/127	1.009	59	1.148		129/128	1.353	58	[1.221]		130/128	1.25
246	gi|53129115	hypothetical protein RCJMB04_5g20 [Gallus gallus]	2060	32947	85	78	14	13	59.1	7.03	12.34	Quantitation summary for protein	129/126	0.97	81	[1.120]		130/126	1.246	81	[1.155]		131/126	0.842	81	[1.142]		129/127	1.057	81	[1.047]		130/127	1.331	81	[1.041]		131/127	0.926	81	[1.048]		129/128	1.122	81	[1.111]		130/128	1.411
247	gi|53127356	hypothetical protein RCJMB04_1p19 [Gallus gallus]	2060	92147	95	82	35	30	46.4	5.72	3.05	Quantitation summary for protein	129/126	0.84	88	1.061	*	130/126	0.917	88	[1.138]		131/126	0.88	88	1.066	*	129/127	0.913	87	[1.056]		130/127	0.977	87	[1.059]		131/127	0.966	87	[1.049]		129/128	0.739	88	[1.135]		130/128	0.79
248	gi|833621	alpha tropomyosin of brain [Gallus gallus]	2056	33745	155	120	32	29	66.1	4.68	98.09	Quantitation summary for protein	129/126	0.658	12	1.078	*	130/126	0.531	12	1.114	*	131/126	0.603	12	1.077	*	129/127	1.014	12	1.084		130/127	0.803	12	1.063	*	131/127	0.938	12	1.081	*	129/128	2.348	12	1.104	*	130/128	1.731
249	gi|63511	heat shock protein 47 [Gallus gallus]	2049	54877	92	84	22	22	52.8	8.74	8.17	Quantitation summary for protein	129/126	0.88	85	1.066	*	130/126	1.015	86	[1.130]		131/126	0.907	85	[1.072]		129/127	1.146	85	1.038	*	130/127	1.297	85	1.06	*	131/127	1.193	85	1.03	*	129/128	1.576	83	[1.106]		130/128	1.775
250	gi|363739542	PREDICTED: eukaryotic translation initiation factor 3 subunit B-like [Gallus gallus]	2046	95699	89	77	26	23	38.7	5.12	2.04	Quantitation summary for protein	129/126	1.309	83	1.057	*	130/126	1.407	83	[1.092]		131/126	1.278	83	1.061	*	129/127	1.047	83	[1.035]		130/127	1.104	83	[1.035]		131/127	1.033	83	[1.035]		129/128	0.904	83	[1.076]		130/128	0.951
251	gi|53133788	hypothetical protein RCJMB04_20e18 [Gallus gallus]	2044	113465	90	70	30	25	38	6.03	1.78	Quantitation summary for protein	129/126	1.325	77	1.055	*	130/126	1.331	77	[1.075]		131/126	1.156	77	[1.050]		129/127	0.951	77	[1.040]		130/127	0.937	77	[1.044]		131/127	0.838	77	[1.035]		129/128	0.478	77	[1.067]		130/128	0.47
252	gi|311213923	fibronectin precursor [Gallus gallus]	2044	294544	80	63	32	27	17.6	5.43	0.52	Quantitation summary for protein	129/126	1.002	66	[1.087]		130/126	0.895	66	[1.132]		131/126	0.937	66	[1.096]		129/127	1.124	66	1.058	*	130/127	0.984	66	[1.058]		131/127	1.061	66	1.043	*	129/128	1.891	66	1.101	*	130/128	1.654
253	gi|114372	RecName: Full=Sodium/potassium-transporting ATPase subunit alpha-1; Short=Na(+)/K(+) ATPase alpha-1 subunit; AltName: Full=Sodium pump subunit alpha-1; Flags: Precursor	2042	126361	74	66	24	23	28.7	5.5	1.21	Quantitation summary for protein	129/126	0.963	41	[1.087]		130/126	1.098	41	[1.108]		131/126	1.111	41	1.072	*	129/127	0.83	41	[1.077]		130/127	0.928	41	[1.061]		131/127	0.966	41	[1.049]		129/128	0.358	41	[1.200]		130/128	0.4
254	gi|53130794	hypothetical protein RCJMB04_10b19 [Gallus gallus]	2039	59282	71	61	16	14	31.1	4.82	2.46	Quantitation summary for protein	129/126	0.735	58	[1.202]		130/126	0.819	59	[1.379]		131/126	0.881	59	[1.253]		129/127	0.811	58	[1.106]		130/127	0.885	59	[1.156]		131/127	0.98	59	[1.107]		129/128	0.64	58	[1.232]		130/128	0.697
255	gi|363743891	PREDICTED: regulator of nonsense transcripts 1 [Gallus gallus]	2033	136685	92	79	36	30	38.4	6.89	1.34	Quantitation summary for protein	129/126	0.974	79	[1.055]		130/126	0.876	79	[1.077]		131/126	0.864	79	[1.053]		129/127	1.134	79	1.03	*	130/127	1	79	[1.035]		131/127	1.016	79	1.028	*	129/128	0.976	79	[1.052]		130/128	0.86
256	gi|118100169	PREDICTED: AP-1 complex subunit beta-1 [Gallus gallus]	2031	120705	75	68	29	28	31.2	5.19	1.84	Quantitation summary for protein	129/126	0.986	51	1.074		130/126	1.164	51	1.109	*	131/126	1.272	50	1.078	*	129/127	0.77	51	[1.044]		130/127	0.892	51	[1.047]		131/127	0.996	51	1.044		129/128	0.548	51	[1.121]		130/128	0.633
257	gi|16660153	transcriptional coactivator p100 [Gallus gallus]	2026	89386	74	65	23	22	38.7	6.03	1.84	Quantitation summary for protein	129/126	1.253	71	[1.070]		130/126	1.021	70	[1.094]		131/126	1.209	71	[1.076]		129/127	1.535	71	[1.040]		130/127	1.216	69	1.03	*	131/127	1.495	71	[1.037]		129/128	0.948	71	[1.071]		130/128	0.756
258	gi|23821300	hexokinase1 [Gallus gallus]	2025	118742	66	65	29	29	32.5	6.32	1.52	Quantitation summary for protein	129/126	0.713	7	1.087	*	130/126	1.269	7	1.285	*	131/126	0.894	8	1.163		129/127	0.898	8	1.036	*	130/127	1.058	7	1.09		131/127	0.958	8	1.037	*	129/128	0.425	7	1.187	*	130/128	0.539
259	gi|68299602	glycinamide ribonucleotide synthetase-aminoimidazole ribonucleotide synthetase-glycinamide ribonucleotide transformylase [Gallus gallus]	2024	124274	73	61	26	22	28.4	7.51	1.42	Quantitation summary for protein	129/126	2.911	2	1.022	*	130/126	5.7	2	1	*	131/126	3.777	2	1.012	*	129/127	1.924	2	1.011	*	130/127	3.693	2	1.033	*	131/127	2.52	2	1.046	*	129/128	0.571	2	1.013	*	130/128	1.094
260	gi|21780320	CAP23 [Gallus gallus]	2024	33902	84	66	24	21	67.2	4.66	15.53	Quantitation summary for protein	129/126	1.673	71	[1.127]		130/126	1.616	69	[1.189]		131/126	1.517	71	[1.130]		129/127	1.209	73	1.103	*	130/127	1.142	71	[1.086]		131/127	1.109	73	1.097	*	129/128	1.652	67	1.205	*	130/128	1.578
261	gi|53133117	hypothetical protein RCJMB04_14i9 [Gallus gallus]	2020	30039	64	55	15	13	61.8	4.76	10.16	Quantitation summary for protein	129/126	1.036	58	[1.202]		130/126	0.922	58	[1.304]		131/126	0.928	58	[1.237]		129/127	1.097	58	[1.105]		130/127	0.959	58	1.091	*	131/127	0.994	58	1.074		129/128	2.084	59	1.227	*	130/128	1.819
262	gi|363745438	PREDICTED: puromycin-sensitive aminopeptidase [Gallus gallus]	2019	108581	90	74	34	28	39.9	5.03	2.09	Quantitation summary for protein	129/126	0.917	48	1.052	*	130/126	1.028	49	[1.109]		131/126	0.991	48	1.055		129/127	0.887	49	[1.058]		130/127	0.952	49	[1.038]		131/127	0.971	49	[1.044]		129/128	0.587	49	[1.106]		130/128	0.629
263	gi|363735855	PREDICTED: heterogeneous nuclear ribonucleoprotein A3 homolog 1-like [Gallus gallus]	2014	46733	97	82	19	16	40.7	9.24	4.89	Quantitation summary for protein	129/126	1.394	68	1.202	*	130/126	2.584	68	1.385	*	131/126	1.42	68	1.233	*	129/127	0.801	68	[1.129]		130/127	1.456	68	1.102	*	131/127	0.824	68	[1.102]		129/128	0.767	68	[1.249]		130/128	1.392
264	gi|33340031	collapsin response mediator protein-4B [Gallus gallus]	1986	69532	71	61	18	16	37	6.25	2.32	Quantitation summary for protein	129/126	0.723	41	[1.045]		130/126	0.572	41	[1.103]		131/126	0.605	40	1.052	*	129/127	1.074	41	1.028	*	130/127	0.833	41	[1.048]		131/127	0.914	41	1.026	*	129/128	1.658	41	1.081	*	130/128	1.285
265	gi|63805	tensin [Gallus gallus]	1985	209454	65	59	28	27	19.9	7.74	0.61	Quantitation summary for protein	129/126	0.774	4	1.081	*	130/126	0.733	4	1.019	*	131/126	0.637	4	1.169	*	129/127	1.335	4	1.046	*	130/127	1.241	4	1.072	*	131/127	1.11	4	1.087		129/128	1.173	4	1.197		130/128	1.136
266	gi|60099213	hypothetical protein RCJMB04_34k20 [Gallus gallus]	1975	32607	82	60	15	11	46.8	8.79	6.65	Quantitation summary for protein	129/126	1.479	45	[1.219]		130/126	1.698	44	[1.456]		131/126	1.347	44	[1.261]		129/127	1.075	45	1.158	*	130/127	1.21	44	1.181	*	131/127	0.989	44	1.118		129/128	1.518	34	[1.448]		130/128	1.757
267	gi|363743392	PREDICTED: alpha-2-macroglobulin-like protein 1-like [Gallus gallus]	1967	180603	119	88	40	35	29.1	5.92	1.41	Quantitation summary for protein	129/126	2.271	106	1.125	*	130/126	1.633	106	[1.153]		131/126	1.899	106	[1.112]		129/127	1.972	106	[1.074]		130/127	1.391	106	[1.058]		131/127	1.667	105	1.056	*	129/128	2.42	106	1.132	*	130/128	1.705
268	gi|62938	myosin regulatory light chain, isoform L20-B1 [Gallus gallus]	1967	23393	93	79	15	11	66.3	4.67	54.01	Quantitation summary for protein	129/126	1.276	33	[1.103]		130/126	1.333	33	[1.173]		131/126	1.23	33	[1.100]		129/127	1.264	33	1.051	*	130/127	1.295	33	[1.070]		131/127	1.222	32	1.037	*	129/128	1.954	32	1.133	*	130/128	1.497
269	gi|53133544	hypothetical protein RCJMB04_17l6 [Gallus gallus]	1962	78324	62	53	20	16	45.6	8.08	2.28	Quantitation summary for protein	129/126	1.181	58	[1.102]		130/126	1.195	58	[1.139]		131/126	1.058	56	1.155	*	129/127	1.068	57	[1.110]		130/127	1.06	57	[1.078]		131/127	0.964	55	1.056	*	129/128	1.02	59	1.09		130/128	1.011
270	gi|363732267	PREDICTED: LOW QUALITY PROTEIN: erythrocyte membrane protein band 4.1-like 2 [Gallus gallus]	1942	157355	102	73	35	29	34.4	4.98	1.05	Quantitation summary for protein	129/126	0.856	74	[1.091]		130/126	0.94	74	[1.189]		131/126	0.889	74	1.108	*	129/127	1.037	75	[1.091]		130/127	1.116	75	[1.077]		131/127	1.087	74	[1.082]		129/128	0.933	74	[1.158]		130/128	1.004
271	gi|53136442	hypothetical protein RCJMB04_29b18 [Gallus gallus]	1934	26121	75	66	15	14	67.8	5.58	11.53	Quantitation summary for protein	129/126	0.908	68	[1.101]		130/126	0.869	68	[1.151]		131/126	0.797	68	[1.111]		129/127	1.232	68	1.073	*	130/127	1.157	68	[1.078]		131/127	1.092	68	[1.068]		129/128	1.663	68	[1.121]		130/128	1.561
272	gi|60098993	hypothetical protein RCJMB04_18g2 [Gallus gallus]	1932	100932	62	61	25	25	34	6.4	1.69	Quantitation summary for protein	129/126	0.829	4	1.119	*	130/126	0.91	4	1.095		131/126	0.881	4	1.16		129/127	0.867	4	1.12		130/127	0.934	4	1.074		131/127	0.931	4	1.168		129/128	0.581	4	[1.136]		130/128	0.626
273	gi|6478775	dynamitin [Gallus gallus]	1932	50941	62	46	17	14	42.8	4.9	2.73	Quantitation summary for protein	129/126	1.07	44	1.057	*	130/126	1.139	47	[1.139]		131/126	1.031	47	[1.085]		129/127	1.08	47	1.049	*	130/127	1.121	47	1.043	*	131/127	1.045	47	1.05	*	129/128	0.933	47	1.131	*	130/128	0.968
274	gi|53136708	hypothetical protein RCJMB04_32l4 [Gallus gallus]	1926	72712	99	78	26	22	39.9	8.41	3.69	Quantitation summary for protein	129/126	0.857	83	[1.043]		130/126	0.782	83	[1.073]		131/126	0.792	83	[1.050]		129/127	1.188	83	1.039	*	130/127	1.064	83	[1.033]		131/127	1.109	83	1.035	*	129/128	1.268	83	[1.068]		130/128	1.135
275	gi|53134059	hypothetical protein RCJMB04_22g22 [Gallus gallus]	1907	60850	108	82	25	18	42.7	8.92	3.6	Quantitation summary for protein	129/126	0.755	83	[1.180]		130/126	0.765	84	[1.291]		131/126	0.815	84	[1.188]		129/127	0.952	83	[1.077]		130/127	0.946	83	[1.095]		131/127	1.037	83	1.077	*	129/128	1.595	83	[1.127]		130/128	1.582
276	gi|1149509	37kD Laminin receptor precursor /p40 ribosomal associated protein [Gallus gallus]	1905	35865	91	76	17	15	58.8	4.8	10.89	Quantitation summary for protein	129/126	1.028	80	[1.120]		130/126	1.08	77	[1.184]		131/126	1.02	77	1.12		129/127	1.105	78	[1.066]		130/127	1.139	77	[1.063]		131/127	1.106	76	1.048	*	129/128	1.422	77	1.135	*	130/128	1.464
277	gi|53133686	hypothetical protein RCJMB04_19g1 [Gallus gallus]	1892	31831	101	87	20	19	68.4	9.68	22.91	Quantitation summary for protein	129/126	1.644	93	1.087	*	130/126	1.53	94	[1.135]		131/126	1.669	93	1.097	*	129/127	1.11	94	[1.058]		130/127	1.013	94	1.04	*	131/127	1.137	94	[1.050]		129/128	1.192	94	[1.088]		130/128	1.087
278	gi|53127794	hypothetical protein RCJMB04_3g13 [Gallus gallus]	1884	71455	112	87	32	27	54.6	6.17	7.25	Quantitation summary for protein	129/126	0.835	90	[1.071]		130/126	0.861	91	[1.132]		131/126	0.821	91	[1.079]		129/127	0.946	90	[1.049]		130/127	0.955	90	1.049	*	131/127	0.939	91	[1.037]		129/128	1.124	90	[1.094]		130/128	1.134
279	gi|5114446	DEAD-box RNA helicase [Gallus gallus]	1881	74942	83	70	26	21	46.6	8.93	3.11	Quantitation summary for protein	129/126	1.039	41	[1.067]		130/126	1.118	41	[1.113]		131/126	1.047	41	[1.074]		129/127	1.032	41	1.042	*	130/127	1.088	41	1.043	*	131/127	1.048	40	1.031	*	129/128	0.699	42	[1.164]		130/128	0.736
280	gi|363735594	PREDICTED: thioredoxin-dependent peroxide reductase, mitochondrial [Gallus gallus]	1869	29238	75	66	10	10	46.2	8.58	7.67	Quantitation summary for protein	129/126	1.13	71	[1.099]		130/126	1.404	71	[1.190]		131/126	1.138	71	[1.110]		129/127	0.92	71	1.068	*	130/127	1.121	71	1.079	*	131/127	0.935	71	1.058	*	129/128	1.36	70	1.216	*	130/128	1.657
281	gi|619577	cardiac muscle tensin [Gallus gallus]	1862	203823	63	58	29	28	20.2	6.88	0.64	Quantitation summary for protein	129/126	0.989	2	2.815		130/126	1.051	2	6.956		131/126	0.946	2	3.157		129/127	0.886	2	2.142		130/127	0.923	2	1.153		131/127	0.856	2	1.911		129/128	0.764	2	2.98		130/128	0.796
282	gi|257216574	ADF actin binding protein [Gallus gallus]	1847	19877	105	82	17	14	80.3	5.33	57.37	Quantitation summary for protein	129/126	0.964	94	[1.125]		130/126	1.044	94	[1.209]		131/126	0.922	94	[1.136]		129/127	0.817	94	[1.073]		130/127	0.867	94	[1.079]		131/127	0.788	94	1.061	*	129/128	1.665	93	[1.222]		130/128	1.816
283	gi|57240090	vimentin, partial [Gallus gallus]	1846	33530	85	77	20	19	66.3	4.75	11.79	Quantitation summary for protein	129/126	0.441	11	1.121	*	130/126	1.03	11	1.104		131/126	0.468	11	[1.172]		129/127	0.283	11	[1.149]		130/127	0.648	11	1.046	*	131/127	0.303	10	1.096	*	129/128	1.283	11	[1.077]		130/128	2.934
284	gi|363743383	PREDICTED: uncharacterized protein LOC419965 [Gallus gallus]	1842	133597	87	70	34	29	31.2	5.84	1.33	Quantitation summary for protein	129/126	0.891	69	[1.052]		130/126	0.898	69	[1.092]		131/126	1.254	69	[1.065]		129/127	0.736	69	[1.040]		130/127	0.727	69	[1.043]		131/127	1.046	69	[1.039]		129/128	0.518	69	[1.101]		130/128	0.512
285	gi|363743852	PREDICTED: gamma-interferon-inducible lysosomal thiol reductase [Gallus gallus]	1841	29999	58	47	5	4	26.9	5.56	2.54	Quantitation summary for protein	129/126	1.05	54	[1.052]		130/126	0.915	54	[1.066]		131/126	0.88	54	[1.050]		129/127	1.171	54	1.037	*	130/127	1.001	54	1.034		131/127	0.991	54	1.033	*	129/128	1.746	54	[1.065]		130/128	1.49
286	gi|65324	brush border myosin IB [Gallus gallus]	1832	144746	77	68	31	25	29.4	9.26	1.18	Quantitation summary for protein	129/126	0.976	64	[1.046]		130/126	0.925	64	[1.084]		131/126	0.831	64	[1.049]		129/127	1.092	64	[1.047]		130/127	1.014	64	[1.037]		131/127	0.941	62	1.029	*	129/128	0.592	64	[1.101]		130/128	0.549
287	gi|516684	unnamed protein product [Gallus gallus]	1818	30396	89	80	18	14	46.9	11.75	9.88	Quantitation summary for protein	129/126	0.757	84	[1.105]		130/126	0.666	84	[1.163]		131/126	0.755	84	[1.114]		129/127	1.077	84	[1.049]		130/127	0.93	84	[1.064]		131/127	1.085	84	[1.042]		129/128	0.933	84	[1.166]		130/128	0.804
288	gi|53135834	hypothetical protein RCJMB04_25p23 [Gallus gallus]	1814	59610	88	77	23	19	43.9	11.11	3.75	Quantitation summary for protein	129/126	0.827	78	[1.120]		130/126	0.717	78	[1.191]		131/126	0.747	78	[1.130]		129/127	1.084	78	[1.064]		130/127	0.922	78	1.055	*	131/127	0.989	78	1.05	*	129/128	0.6	78	[1.192]		130/128	0.51
289	gi|53127112	hypothetical protein RCJMB04_1j4 [Gallus gallus]	1811	105056	59	53	21	19	28.2	5.6	1.36	Quantitation summary for protein	129/126	0.914	57	[1.058]		130/126	1.038	56	[1.102]		131/126	0.956	57	1.066	*	129/127	0.909	57	1.043	*	130/127	1.012	56	[1.046]		131/127	0.96	57	[1.039]		129/128	0.835	56	[1.089]		130/128	0.929
290	gi|11999245	ATP synthase alpha subunit [Gallus gallus]	1808	14292	83	67	12	10	66.4	9.93	70.39	Quantitation summary for protein	129/126	1.079	7	1.032	*	130/126	0.492	7	1.179	*	131/126	0.899	7	1.043	*	129/127	1.452	7	1.097	*	130/127	0.649	7	1.084	*	131/127	1.221	7	1.07	*	129/128	2.526	7	1.574	*	130/128	1.129
291	gi|363738612	PREDICTED: constitutive coactivator of PPAR-gamma-like protein 1-like [Gallus gallus]	1806	137414	56	52	21	19	25.7	9.02	0.76	Quantitation summary for protein	129/126	1.087	52	[1.123]		130/126	0.938	52	[1.176]		131/126	0.999	52	[1.146]		129/127	1.385	52	[1.066]		130/127	1.173	52	1.071	*	131/127	1.286	52	1.057	*	129/128	0.786	52	1.103	*	130/128	0.665
292	gi|319655768	fatty acid synthase [Gallus gallus]	1790	307128	71	54	29	23	15.2	5.92	0.36	Quantitation summary for protein	129/126	1.156	13	1.081	*	130/126	1.375	13	1.123	*	131/126	1.039	13	1.106		129/127	1.079	13	1.06	*	130/127	1.258	13	[1.145]		131/127	0.979	13	1.05		129/128	0.28	13	1.304	*	130/128	0.326
293	gi|63606	unnamed protein product [Gallus gallus]	1789	23327	78	66	13	9	65.7	4.8	48	Quantitation summary for protein	129/126	1.001	18	[1.266]		130/126	1.17	18	1.489		131/126	1.029	18	1.291		129/127	1.141	18	1.098	*	130/127	1.308	18	1.138	*	131/127	1.185	18	1.101	*	129/128	1.076	17	1.358		130/128	1.205
294	gi|50745166	PREDICTED: trifunctional enzyme subunit beta, mitochondrial [Gallus gallus]	1785	58665	69	59	18	17	36.5	9.37	2.32	Quantitation summary for protein	129/126	1.129	63	[1.043]		130/126	1.085	63	[1.081]		131/126	1.034	63	[1.050]		129/127	1.096	63	[1.036]		130/127	1.033	63	[1.031]		131/127	1.014	63	[1.026]		129/128	1.207	63	[1.109]		130/128	1.136
295	gi|30575684	glycogen phosphorylase [Gallus gallus]	1782	110533	69	59	32	26	38.3	6.08	1.7	Quantitation summary for protein	129/126	---	1	---		130/126	---	1	---		131/126	---	1	---		129/127	---	1	---		130/127	---	1	---		131/127	---	1	---		129/128	---	1	---		130/128	---
296	gi|402296	ribosomal protein S4 [Gallus gallus]	1777	36221	75	66	18	18	53.2	10.16	10.63	Quantitation summary for protein	129/126	1.208	72	1.171	*	130/126	1.137	72	1.314	*	131/126	1.315	72	1.204	*	129/127	1.035	72	[1.147]		130/127	0.955	72	[1.090]		131/127	1.137	72	[1.121]		129/128	0.808	73	[1.279]		130/128	0.745
297	gi|53130732	hypothetical protein RCJMB04_9m1 [Gallus gallus]	1776	78414	97	80	30	26	45.6	5.89	4.16	Quantitation summary for protein	129/126	1.139	86	[1.078]		130/126	1.341	86	[1.112]		131/126	1.031	86	[1.084]		129/127	0.93	87	1.033	*	130/127	1.074	87	[1.026]		131/127	0.85	87	[1.030]		129/128	0.95	87	[1.059]		130/128	1.096
298	gi|12249117	proliferating cell nuclear antigen [Gallus gallus]	1775	32878	64	56	16	13	63	4.6	9.08	Quantitation summary for protein	129/126	0.852	60	[1.109]		130/126	0.991	60	[1.245]		131/126	0.932	60	[1.117]		129/127	0.978	60	[1.096]		130/127	1.116	60	[1.076]		131/127	1.08	60	[1.076]		129/128	0.97	60	[1.177]		130/128	1.106
299	gi|363735880	PREDICTED: splicing factor 3B subunit 1 [Gallus gallus]	1771	165854	90	76	36	31	29.1	6.65	1.18	Quantitation summary for protein	129/126	0.876	79	[1.060]		130/126	1.007	79	[1.092]		131/126	1.046	79	[1.064]		129/127	0.813	78	[1.047]		130/127	0.917	78	1.047	*	131/127	0.979	78	[1.037]		129/128	0.409	79	[1.111]		130/128	0.461
300	gi|53133742	hypothetical protein RCJMB04_19o8 [Gallus gallus]	1768	54675	60	54	18	16	34.6	8.34	3.31	Quantitation summary for protein	129/126	0.77	56	[1.134]		130/126	0.852	56	[1.215]		131/126	0.747	56	[1.149]		129/127	0.875	56	1.063	*	130/127	0.948	56	[1.082]		131/127	0.857	56	1.059	*	129/128	1.046	56	1.137	*	130/128	1.132
301	gi|53127764	hypothetical protein RCJMB04_3f8 [Gallus gallus]	1767	63047	82	66	18	12	37.4	8.19	2.56	Quantitation summary for protein	129/126	0.794	72	[1.057]		130/126	0.796	71	[1.119]		131/126	0.758	71	[1.064]		129/127	0.899	72	1.045	*	130/127	0.884	72	[1.038]		131/127	0.867	72	1.033	*	129/128	1.615	72	[1.084]		130/128	1.586
302	gi|118085057	PREDICTED: acetyl-CoA acetyltransferase A, mitochondrial [Gallus gallus]	1754	51394	59	50	21	19	55.3	9.12	5.06	Quantitation summary for protein	129/126	1.057	54	[1.108]		130/126	1.394	54	1.178	*	131/126	1.103	54	[1.129]		129/127	0.8	53	1.072	*	130/127	1.051	55	[1.061]		131/127	0.872	54	[1.062]		129/128	0.717	54	[1.110]		130/128	0.912
303	gi|50728568	PREDICTED: uncharacterized protein LOC417941 [Gallus gallus]	1751	27970	74	56	13	13	70	5.08	9.63	Quantitation summary for protein	129/126	1.174	65	[1.184]		130/126	1.718	65	1.302	*	131/126	1.235	65	1.217	*	129/127	0.972	65	1.127		130/127	1.394	65	1.098	*	131/127	1.032	65	1.109	*	129/128	1.636	65	[1.246]		130/128	2.344
304	gi|53132964	hypothetical protein RCJMB04_14e22 [Gallus gallus]	1749	59633	69	54	20	15	38.7	10.2	3.26	Quantitation summary for protein	129/126	1.044	57	1.096	*	130/126	1.212	57	1.166	*	131/126	1.032	57	1.116	*	129/127	0.884	58	1.064	*	130/127	1.014	58	[1.046]		131/127	0.884	58	[1.057]		129/128	0.658	58	[1.140]		130/128	0.754
305	gi|118083310	PREDICTED: ubiquitin carboxyl-terminal hydrolase 5 isoform 2 [Gallus gallus]	1744	106627	55	50	17	16	28.6	5.03	0.94	Quantitation summary for protein	129/126	0.876	51	[1.056]		130/126	0.928	50	[1.091]		131/126	0.956	51	[1.069]		129/127	0.891	51	1.042	*	130/127	0.925	50	[1.039]		131/127	0.98	50	1.03	*	129/128	0.506	51	[1.077]		130/128	0.524
306	gi|53126205	hypothetical protein RCJMB04_1b5 [Gallus gallus]	1744	19708	90	61	15	13	83.4	5.43	110.91	Quantitation summary for protein	129/126	1.114	80	1.099	*	130/126	1.082	79	[1.187]		131/126	1.085	80	[1.117]		129/127	0.925	80	1.094	*	130/127	0.881	79	[1.068]		131/127	0.91	80	[1.059]		129/128	2.104	76	1.204	*	130/128	2.003
307	gi|363735661	PREDICTED: PDZ and LIM domain protein 1 isoform 4 [Gallus gallus]	1741	52905	67	56	19	16	55.1	7.22	4.42	Quantitation summary for protein	129/126	0.523	60	1.094	*	130/126	0.66	61	[1.129]		131/126	0.53	59	1.113	*	129/127	0.745	59	[1.085]		130/127	0.924	59	[1.086]		131/127	0.763	58	[1.084]		129/128	0.74	59	[1.101]		130/128	0.916
308	gi|60098399	hypothetical protein RCJMB04_1j11 [Gallus gallus]	1734	64631	58	49	22	18	38.3	6.57	2.82	Quantitation summary for protein	129/126	1.023	55	[1.098]		130/126	0.882	55	[1.168]		131/126	0.815	55	[1.113]		129/127	1.139	55	1.051	*	130/127	0.963	55	[1.048]		131/127	0.916	55	1.041	*	129/128	1.668	55	[1.127]		130/128	1.409
309	gi|63765	ras-like protein [Gallus gallus]	1733	28937	65	54	9	9	33.3	7.7	6.9	Quantitation summary for protein	129/126	1.094	57	[1.129]		130/126	0.686	56	[1.359]		131/126	0.855	57	[1.160]		129/127	1.367	57	[1.156]		130/127	0.839	56	[1.100]		131/127	1.078	57	[1.114]		129/128	2.007	56	[1.360]		130/128	1.231
310	gi|2737971	CFR-associated protein p70 [Gallus gallus]	1731	98713	63	52	23	20	33.9	9.19	1.94	Quantitation summary for protein	129/126	0.999	53	1.099		130/126	1.056	53	1.122	*	131/126	1.068	55	1.109	*	129/127	0.902	53	1.05	*	130/127	0.955	55	1.067	*	131/127	0.974	55	1.045	*	129/128	0.436	54	[1.151]		130/128	0.461
311	gi|118092776	PREDICTED: WASH complex subunit FAM21A [Gallus gallus]	1730	177819	58	51	27	27	27	4.59	0.73	Quantitation summary for protein	129/126	0.88	52	[1.067]		130/126	0.798	52	[1.115]		131/126	0.784	52	[1.077]		129/127	1.54	51	1.06	*	130/127	1.369	51	1.046	*	131/127	1.384	50	1.043	*	129/128	1.392	51	1.104	*	130/128	1.236
312	gi|53133814	hypothetical protein RCJMB04_20j17 [Gallus gallus]	1729	90005	57	45	22	15	35.4	6.5	1.2	Quantitation summary for protein	129/126	0.994	49	1.072		130/126	1.122	49	[1.138]		131/126	1.036	49	1.087	*	129/127	0.836	49	[1.051]		130/127	0.926	49	1.047	*	131/127	0.88	49	1.043	*	129/128	0.701	49	[1.097]		130/128	0.775
313	gi|50755563	PREDICTED: 28 kDa heat- and acid-stable phosphoprotein [Gallus gallus]	1726	27004	65	54	16	14	50.6	7.79	6.26	Quantitation summary for protein	129/126	1.192	56	[1.168]		130/126	1.144	56	[1.218]		131/126	1.05	56	[1.175]		129/127	1.519	56	[1.072]		130/127	1.43	56	[1.092]		131/127	1.351	56	1.069	*	129/128	1.81	56	[1.141]		130/128	1.702
314	gi|53133898	hypothetical protein RCJMB04_21l24 [Gallus gallus]	1722	110597	70	59	32	26	36.2	6.06	1.7	Quantitation summary for protein	129/126	1.217	2	1.109		130/126	1.534	2	1.149		131/126	1.13	2	1.075		129/127	0.89	2	1.006	*	130/127	1.101	2	1.042		131/127	0.835	2	1.025		129/128	0.58	2	1.087		130/128	0.716
315	gi|53136740	hypothetical protein RCJMB04_33d2 [Gallus gallus]	1719	68832	47	44	14	13	29.2	6.25	1.54	Quantitation summary for protein	129/126	1.198	40	[1.112]		130/126	0.94	40	[1.183]		131/126	1.002	40	[1.125]		129/127	0.967	40	[1.063]		130/127	0.744	40	1.054	*	131/127	0.816	40	[1.067]		129/128	0.771	40	[1.168]		130/128	0.593
316	gi|118098350	PREDICTED: cytochrome b-c1 complex subunit 2, mitochondrial-like [Gallus gallus]	1706	55194	64	56	19	16	41.8	9.04	3.02	Quantitation summary for protein	129/126	0.913	57	1.102	*	130/126	0.982	57	[1.173]		131/126	0.931	56	[1.117]		129/127	1.001	57	[1.090]		130/127	1.056	57	[1.042]		131/127	1.031	56	[1.057]		129/128	1.163	56	[1.112]		130/128	1.228
317	gi|26801170	cohesin complex subunit [Gallus gallus]	1704	170985	90	74	42	38	34.4	6.65	1.26	Quantitation summary for protein	129/126	0.961	80	1.061	*	130/126	1.237	80	[1.100]		131/126	0.973	79	1.061	*	129/127	0.811	80	[1.030]		130/127	1.023	82	[1.033]		131/127	0.817	81	1.028	*	129/128	0.808	80	[1.069]		130/128	1.019
318	gi|515838	single stranded D box binding factor [Gallus gallus]	1703	38831	67	54	16	13	36.8	8.62	5.56	Quantitation summary for protein	129/126	1.134	61	[1.113]		130/126	1.168	61	1.21	*	131/126	1.042	61	[1.118]		129/127	1.073	61	1.063	*	130/127	1.083	61	[1.074]		131/127	0.995	61	1.053		129/128	0.942	61	[1.260]		130/128	0.95
319	gi|60099015	hypothetical protein RCJMB04_19g16 [Gallus gallus]	1685	64504	66	53	22	19	43.3	5.57	2.83	Quantitation summary for protein	129/126	2.096	61	1.137	*	130/126	1.987	60	1.174	*	131/126	2.471	61	1.168	*	129/127	1.721	61	1.075	*	130/127	1.547	61	1.053	*	131/127	2.048	61	[1.061]		129/128	1.287	61	1.108	*	130/128	1.156
320	gi|60099101	hypothetical protein RCJMB04_25f13 [Gallus gallus]	1684	118198	66	59	22	20	27.9	6.62	1.15	Quantitation summary for protein	129/126	0.888	5	1.05	*	130/126	0.886	5	[1.261]		131/126	0.903	5	1.076	*	129/127	1.176	5	1.04	*	130/127	1.15	5	[1.195]		131/127	1.208	5	1.041	*	129/128	0.728	5	1.351		130/128	0.711
321	gi|118100855	PREDICTED: probable aminopeptidase NPEPL1 [Gallus gallus]	1684	62410	63	50	16	15	34.6	6.41	1.94	Quantitation summary for protein	129/126	0.903	55	[1.072]		130/126	0.796	55	1.069	*	131/126	0.8	55	1.057	*	129/127	0.976	55	[1.071]		130/127	0.845	55	[1.047]		131/127	0.874	55	[1.046]		129/128	1.521	55	[1.097]		130/128	1.315
322	gi|6065857	dynactin [Gallus gallus]	1682	159940	65	60	23	21	24.7	6.15	0.62	Quantitation summary for protein	129/126	1.067	61	[1.082]		130/126	1.178	61	[1.101]		131/126	1.291	61	1.093	*	129/127	0.877	61	1.036	*	130/127	0.949	61	[1.041]		131/127	1.071	61	1.04	*	129/128	0.438	61	1.099	*	130/128	0.474
323	gi|60099199	hypothetical protein RCJMB04_34d13 [Gallus gallus]	1681	158623	75	61	31	25	24.8	7.53	0.92	Quantitation summary for protein	129/126	1.318	65	1.073	*	130/126	1.202	65	1.101	*	131/126	1.308	65	1.075	*	129/127	1.116	65	1.039	*	130/127	0.998	65	1.038		131/127	1.118	65	1.037	*	129/128	0.339	65	1.111	*	130/128	0.303
324	gi|53127436	hypothetical protein RCJMB04_2g5 [Gallus gallus]	1672	44082	100	76	23	16	51.2	6.92	11.55	Quantitation summary for protein	129/126	1.026	86	[1.233]		130/126	1.13	86	[1.355]		131/126	0.912	86	[1.263]		129/127	0.927	86	[1.094]		130/127	1.002	86	1.08		131/127	0.832	87	1.075	*	129/128	1.24	86	1.21	*	130/128	1.338
325	gi|363742034	PREDICTED: phosphopantothenate--cysteine ligase-like [Gallus gallus]	1668	36040	48	43	14	13	56.1	6.47	5.33	Quantitation summary for protein	129/126	1.112	45	[1.116]		130/126	1.37	45	[1.180]		131/126	1.106	45	[1.129]		129/127	0.798	44	1.056	*	130/127	0.964	45	1.036	*	131/127	0.801	45	1.055	*	129/128	1.185	45	1.084	*	130/128	1.429
326	gi|53131892	hypothetical protein RCJMB04_12f9 [Gallus gallus]	1662	64277	65	50	22	18	44.9	6.31	2.84	Quantitation summary for protein	129/126	0.894	51	1.163	*	130/126	1.006	51	[1.270]		131/126	0.92	50	1.183	*	129/127	0.885	50	1.095	*	130/127	0.977	50	[1.111]		131/127	0.919	49	[1.093]		129/128	1.867	49	1.121	*	130/128	2.059
327	gi|50754381	PREDICTED: ras-related protein Rab-7a isoform 2 [Gallus gallus]	1661	27943	66	59	20	17	85.5	6.4	25.14	Quantitation summary for protein	129/126	1.087	64	[1.106]		130/126	1.303	64	1.144	*	131/126	1.245	64	1.099	*	129/127	0.883	64	1.065	*	130/127	1.046	63	1.041	*	131/127	1.022	64	[1.057]		129/128	0.422	64	[1.138]		130/128	0.495
328	gi|50762393	PREDICTED: fructose-1,6-bisphosphatase 1 [Gallus gallus]	1660	43237	73	55	21	17	53.4	8.07	6.84	Quantitation summary for protein	129/126	1.159	59	1.077	*	130/126	1.228	59	1.117	*	131/126	1.047	59	[1.094]		129/127	0.813	59	1.055	*	130/127	0.845	59	1.037	*	131/127	0.742	59	1.054	*	129/128	1.448	59	1.07	*	130/128	1.503
329	gi|53126691	hypothetical protein RCJMB04_1f22 [Gallus gallus]	1660	32617	47	46	9	9	41.7	6.75	2.88	Quantitation summary for protein	129/126	0.919	45	[1.071]		130/126	0.919	45	[1.090]		131/126	0.883	45	[1.074]		129/127	1.274	45	1.046	*	130/127	1.25	45	[1.044]		131/127	1.236	45	[1.044]		129/128	1.425	42	[1.121]		130/128	1.429
330	gi|13992475	putative FK506-binding protein [Gallus gallus]	1660	33323	56	48	18	15	55.9	9.2	6.35	Quantitation summary for protein	129/126	0.881	50	1.169	*	130/126	0.806	50	[1.324]		131/126	0.778	50	[1.174]		129/127	1.04	50	[1.088]		130/127	0.934	50	[1.115]		131/127	0.928	50	1.084	*	129/128	1.646	49	[1.200]		130/128	1.476
331	gi|453474	acidic ribosomal phosphoprotein [Gallus gallus]	1658	39247	65	50	19	15	47.8	5.72	5.42	Quantitation summary for protein	129/126	1.372	54	[1.133]		130/126	1.502	54	[1.190]		131/126	1.423	54	[1.145]		129/127	1.001	54	[1.063]		130/127	1.075	54	[1.082]		131/127	1.046	53	1.056	*	129/128	0.771	54	[1.221]		130/128	0.827
332	gi|461496478	40S ribosomal protein S2 [Gallus gallus]	1656	36669	86	77	20	18	58.7	10.25	11.32	Quantitation summary for protein	129/126	1.167	80	[1.125]		130/126	0.815	80	[1.197]		131/126	1.108	80	[1.145]		129/127	1.337	80	[1.053]		130/127	0.915	80	[1.041]		131/127	1.282	80	[1.048]		129/128	1.319	80	[1.156]		130/128	0.902
333	gi|38231479	MHC class II antigen [Gallus gallus]	1650	29474	76	62	8	8	35.7	5.17	6.61	Quantitation summary for protein	129/126	0.722	63	1.067	*	130/126	1.051	63	[1.121]		131/126	0.778	62	1.069	*	129/127	0.914	63	[1.062]		130/127	1.304	63	[1.070]		131/127	0.989	63	1.05		129/128	0.87	63	[1.109]		130/128	1.241
334	gi|60098739	hypothetical protein RCJMB04_7j8 [Gallus gallus]	1645	117930	64	59	31	27	38.4	6.63	1.54	Quantitation summary for protein	129/126	0.994	57	[1.061]		130/126	1.122	56	1.067	*	131/126	1.187	57	1.06	*	129/127	0.822	58	[1.042]		130/127	0.9	58	1.046	*	131/127	0.991	59	1.029	*	129/128	0.371	59	1.122	*	130/128	0.406
335	gi|664925	GTP-binding protein [Gallus gallus]	1644	26657	41	37	11	9	55.2	5.98	5.6	Quantitation summary for protein	129/126	0.957	39	[1.121]		130/126	1.127	39	[1.248]		131/126	0.983	39	[1.153]		129/127	0.904	39	[1.084]		130/127	1.044	39	[1.068]		131/127	0.938	39	[1.067]		129/128	0.605	39	[1.131]		130/128	0.692
336	gi|298231107	integrin beta-1 precursor [Gallus gallus]	1632	104930	80	69	23	22	24.7	5.14	1.29	Quantitation summary for protein	129/126	0.915	76	[1.078]		130/126	0.893	76	[1.121]		131/126	0.816	76	[1.088]		129/127	1.024	76	1.047	*	130/127	0.98	76	1.037	*	131/127	0.923	76	1.034	*	129/128	0.887	76	[1.133]		130/128	0.848
337	gi|363733085	PREDICTED: palladin [Gallus gallus]	1631	176725	79	60	23	20	15.9	6.14	0.67	Quantitation summary for protein	129/126	0.751	72	[1.065]		130/126	0.962	72	1.127	*	131/126	1.11	72	[1.074]		129/127	0.663	72	1.053	*	130/127	0.834	72	[1.045]		131/127	0.991	72	1.039	*	129/128	0.857	72	[1.097]		130/128	1.076
338	gi|53129801	hypothetical protein RCJMB04_6c17 [Gallus gallus]	1623	56911	69	57	20	16	42.2	7.11	3.82	Quantitation summary for protein	129/126	1.276	48	[1.174]		130/126	1.268	48	[1.351]		131/126	1.184	48	[1.219]		129/127	1.053	48	1.089	*	130/127	1.027	48	[1.126]		131/127	0.987	48	1.07		129/128	0.936	48	[1.303]		130/128	0.911
339	gi|50748422	PREDICTED: signal recognition particle 54 kDa protein isoform 2 [Gallus gallus]	1619	67174	62	58	19	18	39.3	8.87	2.15	Quantitation summary for protein	129/126	1.092	60	[1.061]		130/126	0.956	60	[1.102]		131/126	1.082	60	[1.071]		129/127	1.371	60	[1.055]		130/127	1.178	60	[1.034]		131/127	1.372	60	[1.037]		129/128	1.083	60	[1.111]		130/128	0.929
340	gi|363736976	PREDICTED: protein phosphatase 1 regulatory subunit 7 [Gallus gallus]	1609	45915	57	51	14	13	56.4	4.88	3.93	Quantitation summary for protein	129/126	1.076	54	[1.065]		130/126	1.394	55	[1.115]		131/126	1.107	53	[1.073]		129/127	0.898	52	1.04	*	130/127	1.145	53	[1.034]		131/127	0.932	52	[1.035]		129/128	1.069	52	1.078	*	130/128	1.36
341	gi|118534	RecName: Full=Glutamate dehydrogenase 1, mitochondrial; Short=GDH 1	1607	64325	70	57	21	20	35.4	8.48	2.47	Quantitation summary for protein	129/126	0.789	32	[1.085]		130/126	0.791	32	[1.188]		131/126	0.697	32	[1.104]		129/127	0.922	32	[1.069]		130/127	0.907	32	1.059	*	131/127	0.823	32	[1.060]		129/128	1.824	32	1.205	*	130/128	1.792
342	gi|363733121	PREDICTED: peptidyl-prolyl cis-trans isomerase D [Gallus gallus]	1607	49790	63	55	18	16	48.1	5.98	3.65	Quantitation summary for protein	129/126	0.996	59	1.099		130/126	1.006	59	1.163		131/126	0.898	58	[1.099]		129/127	0.932	59	1.053	*	130/127	0.923	59	1.058	*	131/127	0.848	58	[1.058]		129/128	0.972	59	1.181		130/128	0.961
343	gi|63778	ribosomal protein L7a [Gallus gallus]	1606	39376	71	67	17	16	47	10.51	5.92	Quantitation summary for protein	129/126	0.804	67	[1.049]		130/126	0.571	67	[1.100]		131/126	0.718	67	[1.067]		129/127	1.143	67	[1.047]		130/127	0.796	67	1.047	*	131/127	1.03	67	[1.042]		129/128	1.218	67	1.128	*	130/128	0.847
344	gi|50732241	PREDICTED: actin-related protein 3B [Gallus gallus]	1600	53285	77	72	9	9	22.5	5.61	1.46	Quantitation summary for protein	129/126	0.488	4	1.288	*	130/126	0.349	4	1.564	*	131/126	0.423	4	1.334	*	129/127	1.186	4	1.148		130/127	0.832	4	1.109	*	131/127	1.038	4	1.132		129/128	1.464	4	1.352		130/128	1.026
345	gi|28375613	damaged-DNA binding protein DDB p127 subunit [Gallus gallus]	1600	140790	91	73	33	30	30.6	5.15	1.34	Quantitation summary for protein	129/126	1.177	84	[1.053]		130/126	1.652	84	1.104	*	131/126	1.193	84	1.059	*	129/127	0.806	84	1.038	*	130/127	1.109	84	[1.031]		131/127	0.825	84	1.031	*	129/128	0.772	84	[1.071]		130/128	1.061
346	gi|63558	unnamed protein product [Gallus gallus]	1600	75655	76	55	31	26	52.9	5.15	2.73	Quantitation summary for protein	129/126	0.891	54	1.058	*	130/126	1.209	54	1.102	*	131/126	0.831	53	1.067	*	129/127	0.579	55	[1.075]		130/127	0.771	55	1.046	*	131/127	0.545	54	[1.064]		129/128	1.182	55	1.099	*	130/128	1.573
347	gi|471434827	chromosome 1 open reading frame, human C11orf54 [Gallus gallus]	1598	41072	52	48	13	12	53.8	6.16	3.7	Quantitation summary for protein	129/126	1.305	50	[1.138]		130/126	1.335	50	[1.218]		131/126	1.053	50	[1.152]		129/127	1.093	49	1.106	*	130/127	1.096	49	[1.066]		131/127	0.89	49	1.071	*	129/128	1.139	49	[1.165]		130/128	1.142
348	gi|53130600	hypothetical protein RCJMB04_8o6 [Gallus gallus]	1593	67023	66	57	22	20	45.5	8.41	3	Quantitation summary for protein	129/126	1.09	15	[1.104]		130/126	0.901	15	[1.106]		131/126	0.879	15	[1.110]		129/127	1.424	15	1.035	*	130/127	1.153	15	1.031	*	131/127	1.159	15	1.024	*	129/128	1.458	15	1.069	*	130/128	1.18
349	gi|53130584	hypothetical protein RCJMB04_8n6 [Gallus gallus]	1585	51535	66	60	22	20	61.2	6.74	5.43	Quantitation summary for protein	129/126	1.02	61	[1.078]		130/126	0.839	61	[1.130]		131/126	0.929	59	[1.092]		129/127	1.226	60	1.05	*	130/127	0.989	60	[1.063]		131/127	1.127	59	[1.049]		129/128	1.299	60	[1.089]		130/128	1.047
350	gi|60098937	hypothetical protein RCJMB04_15p22 [Gallus gallus]	1585	80810	71	63	28	26	49.5	8.3	2.3	Quantitation summary for protein	129/126	1.031	3	1.285		130/126	1.385	3	1.892		131/126	0.99	3	1.421		129/127	0.689	3	1.276		130/127	0.908	3	1.262		131/127	0.668	3	1.158	*	129/128	0.457	3	2.781		130/128	0.602
351	gi|363744134	PREDICTED: NAD(P) transhydrogenase, mitochondrial [Gallus gallus]	1582	128082	60	52	25	23	27.3	6.97	0.97	Quantitation summary for protein	129/126	0.949	57	[1.104]		130/126	0.986	57	[1.153]		131/126	1.08	57	[1.110]		129/127	0.809	57	[1.051]		130/127	0.824	57	1.042	*	131/127	0.929	57	1.036	*	129/128	0.337	57	1.127	*	130/128	0.343
352	gi|53127418	hypothetical protein RCJMB04_2e14 [Gallus gallus]	1582	80377	71	61	28	24	49.3	7.9	2.19	Quantitation summary for protein	129/126	0.786	2	1.079		130/126	0.712	2	2.057		131/126	0.727	2	1.329		129/127	1.018	2	1	*	130/127	0.904	2	1.906		131/127	0.95	2	1.435		129/128	0.409	2	1.323		130/128	0.363
353	gi|15718362	MHC class II-associated invariant chain [Gallus gallus]	1582	37801	76	60	17	14	49.3	8.59	6.48	Quantitation summary for protein	129/126	1.207	4	1.038	*	130/126	1.096	4	1.038	*	131/126	0.479	4	1.071	*	129/127	0.966	4	1.039		130/127	0.86	4	1.026	*	131/127	0.387	4	1.093	*	129/128	1.917	4	1.061	*	130/128	1.704
354	gi|60098659	hypothetical protein RCJMB04_4m11 [Gallus gallus]	1581	124128	57	54	21	20	27.2	4.85	1.18	Quantitation summary for protein	129/126	1.119	53	[1.097]		130/126	1.146	54	[1.142]		131/126	1.027	53	[1.104]		129/127	1.019	53	[1.049]		130/127	1.022	54	1.048	*	131/127	0.944	53	1.044	*	129/128	1.067	52	1.067	*	130/128	1.069
355	gi|118094409	PREDICTED: serine/threonine-protein kinase N2 [Gallus gallus]	1581	132392	53	50	24	24	29.9	6.41	0.98	Quantitation summary for protein	129/126	1.067	51	1.085	*	130/126	1.166	51	1.153	*	131/126	1.089	51	[1.091]		129/127	0.99	51	1.062		130/127	1.061	51	1.053	*	131/127	1.02	51	[1.048]		129/128	0.865	51	[1.105]		130/128	0.926
356	gi|47606843	invariant chain isoform p41 [Gallus gallus]	1581	37631	78	64	18	15	51.4	8.58	7.96	Quantitation summary for protein	129/126	1.119	6	1.133		130/126	0.744	6	1.114	*	131/126	0.97	6	1.088		129/127	1.282	5	1.064	*	130/127	1.038	6	1.071		131/127	1.394	6	1.119	*	129/128	1.511	6	1.19	*	130/128	0.984
357	gi|158341632	Treacher Collins-Franceschetti syndrome 1 [Gallus gallus]	1575	130875	62	55	21	19	24.4	9.04	0.95	Quantitation summary for protein	129/126	---	1	---		130/126	---	1	---		131/126	---	1	---		129/127	---	1	---		130/127	---	1	---		131/127	---	1	---		129/128	---	1	---		130/128	---
358	gi|434018	Yes-associated protein (65kDa) [Gallus gallus]	1572	50542	39	34	12	12	41.1	5.07	1.58	Quantitation summary for protein	129/126	0.946	31	1.136	*	130/126	1.123	33	1.235	*	131/126	0.927	30	1.196	*	129/127	1.094	32	1.125	*	130/127	1.278	33	1.082	*	131/127	1.086	31	[1.098]		129/128	1.131	24	1.228	*	130/128	1.338
359	gi|343790924	aldo-keto reductase family 1, member B1-like [Gallus gallus]	1566	42659	80	63	18	17	54.4	7.14	5.47	Quantitation summary for protein	129/126	---	0	---		130/126	---	0	---		131/126	---	0	---		129/127	---	0	---		130/127	---	0	---		131/127	---	0	---		129/128	---	0	---		130/128	---
360	gi|60098651	hypothetical protein RCJMB04_4i13 [Gallus gallus]	1564	148505	66	57	23	20	19.9	5.94	0.8	Quantitation summary for protein	129/126	1.098	58	1.06	*	130/126	1.096	58	[1.098]		131/126	1.291	58	1.068	*	129/127	1.083	58	[1.043]		130/127	1.06	58	1.037	*	131/127	1.286	58	[1.039]		129/128	0.718	58	[1.083]		130/128	0.702
361	gi|77022044	NK-lysin [Gallus gallus]	1559	18085	48	43	8	7	63.6	5.87	20.73	Quantitation summary for protein	129/126	0.46	45	1.209	*	130/126	0.388	45	[1.355]		131/126	0.639	45	1.237	*	129/127	0.407	45	1.142	*	130/127	0.337	45	1.134	*	131/127	0.57	45	1.089	*	129/128	1.057	43	1.237		130/128	0.898
362	gi|53127772	hypothetical protein RCJMB04_3f15 [Gallus gallus]	1556	23812	64	61	11	11	50	5.37	7.16	Quantitation summary for protein	129/126	0.931	61	[1.146]		130/126	1.208	62	[1.235]		131/126	0.789	62	[1.142]		129/127	0.911	61	1.048	*	130/127	1.158	62	[1.078]		131/127	0.779	62	1.064	*	129/128	0.57	61	[1.149]		130/128	0.722
363	gi|53136550	hypothetical protein RCJMB04_30j1 [Gallus gallus]	1551	83209	74	64	22	18	39.2	5.51	1.63	Quantitation summary for protein	129/126	1.09	33	1.067	*	130/126	1.328	34	[1.141]		131/126	1.028	34	[1.081]		129/127	0.836	35	[1.062]		130/127	0.993	35	1.048		131/127	0.791	35	1.043	*	129/128	0.386	35	1.123	*	130/128	0.457
364	gi|2506056	calpain small subunit [Gallus gallus]	1551	26076	47	44	14	13	73.8	5.05	10.11	Quantitation summary for protein	129/126	1.091	42	1.087	*	130/126	1.265	42	1.16	*	131/126	1.124	42	1.098	*	129/127	0.874	43	1.087	*	130/127	0.996	43	[1.103]		131/127	0.908	43	1.075	*	129/128	0.935	43	[1.173]		130/128	1.064
365	gi|53136894	hypothetical protein RCJMB04_35l12 [Gallus gallus]	1547	72844	59	51	17	14	37.9	9.12	2.44	Quantitation summary for protein	129/126	0.686	54	[1.059]		130/126	0.686	54	[1.100]		131/126	0.665	54	[1.069]		129/127	0.906	55	1.046	*	130/127	0.891	55	1.051	*	131/127	0.89	55	1.046	*	129/128	1.22	55	[1.074]		130/128	1.199
366	gi|53136430	hypothetical protein RCJMB04_28o6 [Gallus gallus]	1545	48313	69	55	18	13	50.7	8.65	5.36	Quantitation summary for protein	129/126	1.026	61	[1.162]		130/126	1.019	61	[1.320]		131/126	0.95	61	[1.180]		129/127	0.885	61	[1.094]		130/127	0.862	61	[1.116]		131/127	0.827	61	[1.094]		129/128	1.238	61	[1.196]		130/128	1.204
367	gi|53130710	hypothetical protein RCJMB04_9j22 [Gallus gallus]	1544	44635	71	63	17	15	33.8	10.1	3.81	Quantitation summary for protein	129/126	0.776	69	[1.104]		130/126	0.828	69	[1.158]		131/126	0.823	69	[1.111]		129/127	0.893	69	[1.048]		130/127	0.934	69	[1.054]		131/127	0.956	69	[1.044]		129/128	1.536	69	[1.085]		130/128	1.605
368	gi|53132751	hypothetical protein RCJMB04_13o20 [Gallus gallus]	1541	44741	45	37	16	14	38.2	5.04	3.46	Quantitation summary for protein	129/126	1.253	39	[1.165]		130/126	1.628	39	[1.302]		131/126	1.178	39	[1.168]		129/127	0.995	41	1.105		130/127	1.19	41	1.064	*	131/127	0.904	41	1.091	*	129/128	1.122	40	[1.196]		130/128	1.343
369	gi|49339399	signal transducer and activator of transcription 3 [Gallus gallus]	1532	99859	60	47	16	15	22	5.94	1.1	Quantitation summary for protein	129/126	1.027	34	1.124		130/126	1.468	33	1.19	*	131/126	1.42	33	1.165	*	129/127	0.642	35	1.135	*	130/127	0.835	35	[1.096]		131/127	0.894	34	1.081	*	129/128	0.311	35	1.173	*	130/128	0.404
370	gi|53136666	hypothetical protein RCJMB04_32c11 [Gallus gallus]	1532	30604	86	68	16	14	71.4	4.63	26.04	Quantitation summary for protein	129/126	0.974	58	[1.102]		130/126	0.769	58	[1.238]		131/126	0.85	58	[1.123]		129/127	1.344	59	[1.084]		130/127	1.042	59	1.077	*	131/127	1.184	59	1.06	*	129/128	1.933	59	[1.227]		130/128	1.497
371	gi|53130129	hypothetical protein RCJMB04_6h13 [Gallus gallus]	1531	47236	47	45	12	12	32.1	5.07	2.85	Quantitation summary for protein	129/126	0.832	46	[1.211]		130/126	0.804	46	[1.250]		131/126	0.813	46	[1.214]		129/127	0.94	46	[1.050]		130/127	0.89	46	[1.074]		131/127	0.927	46	[1.052]		129/128	0.809	46	[1.113]		130/128	0.766
372	gi|304388	glutathione S-transferase [Gallus gallus]	1521	30782	92	69	15	13	60.2	8.86	13.43	Quantitation summary for protein	129/126	1.52	43	1.092	*	130/126	1.384	41	1.109	*	131/126	1.327	43	1.095	*	129/127	1.237	43	[1.064]		130/127	1.116	41	1.047	*	131/127	1.091	43	1.048	*	129/128	1.939	42	[1.186]		130/128	1.748
373	gi|4572456	vitamin-D binding protein precursor [Gallus gallus]	1521	63153	54	53	15	15	34.5	6.47	1.62	Quantitation summary for protein	129/126	0.987	53	[1.056]		130/126	0.997	53	[1.088]		131/126	0.952	53	[1.067]		129/127	0.861	53	[1.043]		130/127	0.853	53	1.027	*	131/127	0.839	53	1.025	*	129/128	1.174	53	[1.050]		130/128	1.162
374	gi|34541988	UBP [Gallus gallus]	1520	148090	70	53	24	19	27.1	5.37	0.84	Quantitation summary for protein	129/126	1.201	62	1.047	*	130/126	1.208	62	[1.061]		131/126	1.079	62	1.045	*	129/127	1.014	62	[1.027]		130/127	1	62	1.022		131/127	0.92	62	1.027	*	129/128	0.707	62	[1.068]		130/128	0.697
375	gi|363729859	PREDICTED: uncharacterized protein LOC396097 [Gallus gallus]	1520	136863	47	39	15	13	18.1	5.74	0.46	Quantitation summary for protein	129/126	0.844	43	1.094	*	130/126	0.981	43	[1.175]		131/126	0.869	43	[1.102]		129/127	1.131	43	1.103	*	130/127	1.29	43	[1.093]		131/127	1.177	43	1.078	*	129/128	0.681	43	[1.200]		130/128	0.776
376	gi|363731161	PREDICTED: protein FAM49B-like [Gallus gallus]	1511	42080	48	39	16	9	47.2	5.76	4.28	Quantitation summary for protein	129/126	0.618	34	1.121	*	130/126	0.684	34	1.2	*	131/126	0.77	33	[1.121]		129/127	0.658	35	1.1	*	130/127	0.718	35	1.126	*	131/127	0.832	34	1.094	*	129/128	0.517	35	1.285	*	130/128	0.564
377	gi|50730713	PREDICTED: ES1 protein homolog, mitochondrial isoform 2 [Gallus gallus]	1508	28611	61	51	14	12	64.4	6.17	10.25	Quantitation summary for protein	129/126	1.096	55	1.083	*	130/126	1.005	55	[1.144]		131/126	0.999	55	[1.096]		129/127	0.893	55	[1.074]		130/127	0.803	55	1.04	*	131/127	0.822	55	[1.056]		129/128	1.472	55	[1.178]		130/128	1.322
378	gi|363745122	PREDICTED: aldo-keto reductase family 1 member B10-like [Gallus gallus]	1502	42375	75	58	17	15	54.4	6.6	4.62	Quantitation summary for protein	129/126	---	0	---		130/126	---	0	---		131/126	---	0	---		129/127	---	0	---		130/127	---	0	---		131/127	---	0	---		129/128	---	0	---		130/128	---
379	gi|42627797	TPA: putative ISG12(2) protein [Gallus gallus]	1501	11707	28	28	4	4	62.6	10.18	5.11	Quantitation summary for protein	129/126	0.265	28	[1.137]		130/126	0.388	28	[1.118]		131/126	0.383	28	[1.104]		129/127	0.777	28	1.055	*	130/127	1.118	28	[1.062]		131/127	1.137	28	1.081	*	129/128	0.651	28	[1.104]		130/128	0.935
380	gi|118088894	PREDICTED: 40S ribosomal protein S7 isoform 2 [Gallus gallus]	1496	27827	72	56	17	15	70.1	10.09	51.15	Quantitation summary for protein	129/126	---	1	---		130/126	---	1	---		131/126	---	1	---		129/127	---	1	---		130/127	---	1	---		131/127	---	1	---		129/128	---	1	---		130/128	---
381	gi|633038	133kDa myosin-binding subunit of smooth muscle myosin phosphatase (M133) [Gallus gallus]	1496	131876	49	43	17	14	18.3	5.45	0.55	Quantitation summary for protein	129/126	0.815	46	1.053	*	130/126	0.931	46	[1.074]		131/126	0.939	46	1.057	*	129/127	1.044	46	[1.059]		130/127	1.169	46	1.058	*	131/127	1.215	46	1.056	*	129/128	1.181	46	[1.084]		130/128	1.322
382	gi|363743351	PREDICTED: 26S protease regulatory subunit 8 [Gallus gallus]	1496	54335	59	54	22	19	59.9	7.11	3.35	Quantitation summary for protein	129/126	1.179	48	1.073	*	130/126	1.187	48	1.11	*	131/126	1.142	48	1.077	*	129/127	1.066	48	[1.044]		130/127	1.053	48	[1.039]		131/127	1.043	48	[1.042]		129/128	1.15	48	[1.135]		130/128	1.134
383	gi|187609622	RecName: Full=Eukaryotic translation initiation factor 2 subunit 1; AltName: Full=Eukaryotic translation initiation factor 2 subunit alpha; Short=eIF-2-alpha; Short=eIF-2A; Short=eIF-2alpha	1496	41482	58	49	20	19	54.6	5.07	4.83	Quantitation summary for protein	129/126	1.067	55	[1.076]		130/126	1.112	55	[1.108]		131/126	1.043	55	[1.071]		129/127	1.048	55	1.043	*	130/127	1.07	55	1.041	*	131/127	1.034	55	1.034	*	129/128	1.123	55	[1.116]		130/128	1.146
384	gi|50750286	PREDICTED: nucleolar protein 58 [Gallus gallus]	1493	75613	40	35	12	10	27.3	8.79	0.74	Quantitation summary for protein	129/126	0.827	40	[1.056]		130/126	1.082	40	[1.109]		131/126	0.958	40	1.064	*	129/127	0.563	40	1.068	*	130/127	0.723	40	1.047	*	131/127	0.659	40	1.056	*	129/128	0.728	40	[1.143]		130/128	0.932
385	gi|211194	5-aminoimidazole ribonucleotide (AIR) carboxylase-5- aminoimidazole-4-N-succinocarboxamide ribonucleotide (SAICAR) synthetase [Gallus gallus]	1491	56087	59	52	20	18	55.4	8.18	2.93	Quantitation summary for protein	129/126	1.091	57	[1.106]		130/126	1.053	57	[1.140]		131/126	1.023	57	[1.114]		129/127	1.123	57	[1.057]		130/127	1.063	57	1.033	*	131/127	1.064	57	[1.053]		129/128	1.013	57	[1.102]		130/128	0.958
386	gi|53133664	hypothetical protein RCJMB04_19c24 [Gallus gallus]	1490	73633	40	38	15	15	30.3	4.7	1.19	Quantitation summary for protein	129/126	1.244	40	1.053	*	130/126	1.372	40	[1.093]		131/126	1.51	40	1.062	*	129/127	0.799	40	[1.049]		130/127	0.864	40	[1.040]		131/127	0.979	40	[1.046]		129/128	0.5	40	[1.123]		130/128	0.54
387	gi|363727400	PREDICTED: ATP synthase subunit gamma, mitochondrial isoform 2 [Gallus gallus]	1485	38717	63	47	13	11	37.8	9.44	4.15	Quantitation summary for protein	129/126	1.187	50	1.06	*	130/126	1.318	51	1.125	*	131/126	1.251	50	[1.068]		129/127	0.923	51	1.053	*	130/127	1.006	50	1.052		131/127	0.983	50	[1.040]		129/128	0.915	50	[1.204]		130/128	0.997
388	gi|53130266	hypothetical protein RCJMB04_6k20 [Gallus gallus]	1485	62056	49	42	20	18	43	9.2	2.64	Quantitation summary for protein	129/126	0.996	46	[1.161]		130/126	0.836	44	[1.122]		131/126	0.795	46	[1.146]		129/127	1.262	43	[1.067]		130/127	1.032	43	1.07	*	131/127	1.016	43	[1.075]		129/128	1.806	44	[1.182]		130/128	1.478
389	gi|53133520	hypothetical protein RCJMB04_17i1 [Gallus gallus]	1484	63780	62	53	21	16	39.1	5.04	2.02	Quantitation summary for protein	129/126	1.018	29	1.116		130/126	1.026	29	[1.190]		131/126	0.917	29	1.117	*	129/127	0.989	29	1.07		130/127	0.977	29	1.072		131/127	0.899	29	[1.066]		129/128	1.041	29	1.218		130/128	1.027
390	gi|363731587	PREDICTED: heterogeneous nuclear ribonucleoprotein U [Gallus gallus]	1483	88996	73	58	28	23	32.3	9.43	2.54	Quantitation summary for protein	129/126	1.159	62	1.112	*	130/126	1.259	62	[1.247]		131/126	1.157	62	[1.129]		129/127	0.974	65	[1.075]		130/127	1.037	65	[1.085]		131/127	0.982	65	[1.055]		129/128	0.62	65	[1.166]		130/128	0.659
391	gi|63566	unnamed protein product [Gallus gallus]	1483	43880	64	52	20	17	55.4	7.75	5.61	Quantitation summary for protein	129/126	1.543	47	[1.161]		130/126	1.992	46	1.197	*	131/126	1.188	47	[1.150]		129/127	1.413	48	[1.060]		130/127	1.635	48	1.081	*	131/127	1.099	48	[1.051]		129/128	0.666	48	[1.173]		130/128	0.77
392	gi|363735083	PREDICTED: enoyl-CoA hydratase, mitochondrial [Gallus gallus]	1481	36078	63	54	17	15	55.5	8.96	7.24	Quantitation summary for protein	129/126	0.898	59	1.081	*	130/126	1.065	59	[1.180]		131/126	0.899	59	1.105	*	129/127	0.844	59	1.066	*	130/127	0.982	59	[1.062]		131/127	0.853	59	1.046	*	129/128	1.277	59	1.113	*	130/128	1.484
393	gi|63797	stathmin [Gallus gallus]	1475	24058	63	53	12	10	54	7.97	9.39	Quantitation summary for protein	129/126	0.785	58	1.051	*	130/126	0.751	58	1.092	*	131/126	0.795	58	[1.051]		129/127	1.475	58	1.058	*	130/127	1.384	58	[1.049]		131/127	1.508	58	1.058	*	129/128	2.03	57	[1.147]		130/128	1.941
394	gi|2315981	17-beta-hydroxysteroid dehydrogenase type IV [Gallus gallus]	1473	92528	61	46	26	21	37.6	8.58	1.47	Quantitation summary for protein	129/126	1.426	52	[1.119]		130/126	1.588	52	[1.164]		131/126	1.359	52	[1.134]		129/127	1.072	52	[1.055]		130/127	1.17	52	[1.072]		131/127	1.032	52	[1.046]		129/128	1.25	52	[1.106]		130/128	1.363
395	gi|53130462	hypothetical protein RCJMB04_7p19 [Gallus gallus]	1473	44158	46	45	15	15	45.1	4.98	2.93	Quantitation summary for protein	129/126	0.95	44	1.072	*	130/126	0.852	44	[1.161]		131/126	0.89	44	[1.090]		129/127	1.224	45	[1.054]		130/127	1.077	45	[1.049]		131/127	1.158	45	[1.043]		129/128	1.415	45	[1.108]		130/128	1.243
396	gi|363746976	PREDICTED: T-complex protein 1 subunit gamma [Gallus gallus]	1467	18807	45	43	11	10	84.8	6.43	13.07	Quantitation summary for protein	129/126	0.845	43	[1.134]		130/126	0.808	43	[1.213]		131/126	0.796	43	[1.153]		129/127	1.076	43	[1.092]		130/127	1.009	43	[1.102]		131/127	1.024	43	[1.084]		129/128	1.078	42	[1.118]		130/128	1.01
397	gi|53130414	hypothetical protein RCJMB04_7j3 [Gallus gallus]	1466	66299	64	56	26	22	46.3	5.8	4.18	Quantitation summary for protein	129/126	1.1	60	1.069	*	130/126	1.032	60	1.122	*	131/126	1.108	59	1.075	*	129/127	1.148	59	[1.055]		130/127	1.056	59	1.054	*	131/127	1.168	59	[1.043]		129/128	1.282	60	1.117	*	130/128	1.178
398	gi|444299628	nascent polypeptide-associated complex alpha subunit [Gallus gallus]	1466	27274	48	37	8	8	34	4.56	7.92	Quantitation summary for protein	129/126	1.587	40	[1.288]		130/126	1.801	32	[1.336]		131/126	1.539	41	[1.324]		129/127	1.389	32	1.174	*	130/127	1.433	28	1.093	*	131/127	1.361	33	1.117	*	129/128	2.082	34	1.254	*	130/128	2.153
399	gi|57157215	eIF4G-related protein NAT1 [Gallus gallus]	1464	114456	69	57	26	19	32.4	6.57	1.14	Quantitation summary for protein	129/126	1.028	61	1.092	*	130/126	1.08	61	[1.166]		131/126	0.911	61	[1.125]		129/127	1.072	62	1.07	*	130/127	1.104	62	1.07	*	131/127	0.959	62	[1.065]		129/128	0.605	59	[1.119]		130/128	0.627
400	gi|118092411	PREDICTED: glutamate dehydrogenase 1, mitochondrial [Gallus gallus]	1463	55068	66	50	17	16	35.3	8.34	2.8	Quantitation summary for protein	129/126	0.771	28	[1.070]		130/126	0.737	28	[1.121]		131/126	0.683	28	[1.074]		129/127	0.956	28	[1.053]		130/127	0.896	28	1.041	*	131/127	0.854	28	[1.058]		129/128	2.143	28	1.139	*	130/128	2.007
401	gi|363729389	PREDICTED: dipeptidyl peptidase 1 [Gallus gallus]	1461	58056	55	47	10	9	21.7	7.85	1.7	Quantitation summary for protein	129/126	1.083	53	[1.074]		130/126	1.146	53	[1.128]		131/126	1.297	53	[1.098]		129/127	0.899	53	1.044	*	130/127	0.933	52	1.043	*	131/127	1.086	53	1.032	*	129/128	1.412	53	1.08	*	130/128	1.462
402	gi|53126810	hypothetical protein RCJMB04_1g20 [Gallus gallus]	1460	98138	60	50	26	24	39.6	8.86	1.59	Quantitation summary for protein	129/126	0.831	52	[1.153]		130/126	0.922	52	[1.240]		131/126	0.763	52	[1.172]		129/127	0.873	52	[1.100]		130/127	0.95	52	1.092	*	131/127	0.809	52	1.083	*	129/128	1.086	50	[1.185]		130/128	1.186
403	gi|363738006	PREDICTED: splicing factor 3B subunit 3 [Gallus gallus]	1458	148748	70	48	22	14	19.1	5.13	0.61	Quantitation summary for protein	129/126	0.987	55	[1.070]		130/126	1.028	55	[1.096]		131/126	0.965	55	[1.075]		129/127	0.927	55	1.04	*	130/127	0.946	55	[1.041]		131/127	0.914	54	1.029	*	129/128	0.741	55	[1.069]		130/128	0.756
404	gi|53131091	hypothetical protein RCJMB04_11d4 [Gallus gallus]	1458	116432	75	57	30	23	36.6	5.68	1.49	Quantitation summary for protein	129/126	0.994	65	1.093		130/126	0.883	65	[1.133]		131/126	0.982	65	[1.097]		129/127	1.057	66	1.044	*	130/127	0.924	64	1.032	*	131/127	1.055	65	[1.041]		129/128	0.862	66	[1.110]		130/128	0.749
405	gi|363744693	PREDICTED: leucyl-cystinyl aminopeptidase [Gallus gallus]	1458	133883	45	40	19	16	19.3	5.29	0.66	Quantitation summary for protein	129/126	0.995	44	1.073		130/126	1.122	44	[1.117]		131/126	1.031	44	1.079	*	129/127	1.047	43	[1.085]		130/127	1.161	43	[1.057]		131/127	1.095	43	[1.078]		129/128	0.466	44	[1.099]		130/128	0.514
406	gi|2338714	restin [Gallus gallus]	1456	198050	89	67	41	34	29	5.27	0.92	Quantitation summary for protein	129/126	1.059	68	1.054	*	130/126	1.078	68	[1.082]		131/126	1.057	68	1.057	*	129/127	0.924	68	1.036	*	130/127	0.922	68	1.026	*	131/127	0.931	68	1.031	*	129/128	0.755	68	1.053	*	130/128	0.753
407	gi|88909244	RecName: Full=Prohibitin	1454	32914	66	53	20	19	68.8	5.57	12.34	Quantitation summary for protein	129/126	0.768	56	[1.175]		130/126	0.775	56	[1.307]		131/126	0.768	56	[1.206]		129/127	1.01	57	[1.066]		130/127	1	56	[1.088]		131/127	1.021	56	[1.046]		129/128	1.354	56	[1.100]		130/128	1.339
408	gi|363727569	PREDICTED: cullin-associated NEDD8-dissociated protein 1 isoform 2 [Gallus gallus]	1454	152872	58	52	23	20	19.1	5.49	0.66	Quantitation summary for protein	129/126	0.956	39	[1.076]		130/126	1.149	41	1.087	*	131/126	1.248	41	1.078	*	129/127	0.743	39	1.039	*	130/127	0.876	41	1.043	*	131/127	0.98	41	1.034	*	129/128	0.266	39	1.105	*	130/128	0.313
409	gi|363738636	PREDICTED: dolichyl-diphosphooligosaccharide--protein glycosyltransferase subunit 1, partial [Gallus gallus]	1451	71113	60	50	24	19	43.8	6.42	2.54	Quantitation summary for protein	129/126	1.359	54	1.111	*	130/126	1.541	53	1.157	*	131/126	1.453	54	1.121	*	129/127	1.051	53	1.045	*	130/127	1.148	54	1.063	*	131/127	1.14	54	1.045	*	129/128	0.534	54	[1.219]		130/128	0.58
410	gi|47606841	invariant chain [Gallus gallus]	1449	29380	66	54	17	14	61.9	8.69	12.1	Quantitation summary for protein	129/126	---	1	---		130/126	---	1	---		131/126	---	1	---		129/127	---	1	---		130/127	---	1	---		131/127	---	1	---		129/128	---	1	---		130/128	---
411	gi|53136650	hypothetical protein RCJMB04_32b13 [Gallus gallus]	1448	115407	46	34	17	14	25.8	7.21	0.7	Quantitation summary for protein	129/126	0.96	39	[1.105]		130/126	1.072	39	[1.145]		131/126	0.952	39	1.135	*	129/127	1.141	39	[1.086]		130/127	1.25	39	[1.091]		131/127	1.143	39	1.077	*	129/128	0.898	39	[1.081]		130/128	0.983
412	gi|23821302	hexokinase2 [Gallus gallus]	1448	117640	54	48	21	19	23.8	5.74	0.98	Quantitation summary for protein	129/126	0.943	43	[1.070]		130/126	1.11	43	[1.128]		131/126	1.087	43	[1.080]		129/127	0.788	43	1.044	*	130/127	0.909	43	1.051	*	131/127	0.917	43	[1.034]		129/128	0.517	42	[1.085]		130/128	0.596
413	gi|2766187	aminopeptidase Ey [Gallus gallus]	1446	115132	56	51	22	21	28.6	5.06	1.19	Quantitation summary for protein	129/126	1.097	4	1.069		130/126	1.462	4	[1.128]		131/126	1.022	4	1.095		129/127	0.76	4	1.084	*	130/127	0.992	4	1.09		131/127	0.714	4	1.073	*	129/128	0.886	4	1.042	*	130/128	1.216
414	gi|10636369	coagulation factor XIIIA [Gallus gallus]	1443	95323	66	53	21	18	27.7	6.22	1.49	Quantitation summary for protein	129/126	2.218	61	1.094	*	130/126	1.417	61	[1.164]		131/126	0.913	61	[1.095]		129/127	2.134	61	1.078	*	130/127	1.336	61	[1.055]		131/127	0.887	61	1.045	*	129/128	1.462	61	[1.149]		130/128	0.915
415	gi|50748536	PREDICTED: activator of 90 kDa heat shock protein ATPase homolog 1 isoform 2 [Gallus gallus]	1443	45526	53	48	17	15	51.8	5.61	2.78	Quantitation summary for protein	129/126	0.937	52	[1.099]		130/126	1.09	52	[1.140]		131/126	1.083	52	[1.109]		129/127	1.107	51	1.056	*	130/127	1.262	51	1.053	*	131/127	1.292	51	1.056	*	129/128	0.949	52	[1.150]		130/128	1.081
416	gi|363744728	PREDICTED: endoplasmic reticulum aminopeptidase 1 [Gallus gallus]	1441	120415	75	63	26	23	32	5.9	1.23	Quantitation summary for protein	129/126	1.126	64	1.057	*	130/126	1.756	64	[1.103]		131/126	1.531	65	1.074	*	129/127	0.721	66	[1.045]		130/127	1.102	65	1.055	*	131/127	0.991	66	1.039	*	129/128	0.511	66	[1.083]		130/128	0.78
417	gi|53127063	hypothetical protein RCJMB04_1i19 [Gallus gallus]	1438	58916	70	59	16	13	42.4	8.77	2.68	Quantitation summary for protein	129/126	0.808	63	[1.112]		130/126	0.955	63	[1.158]		131/126	0.978	63	1.124		129/127	0.689	63	1.065	*	130/127	0.799	63	1.058	*	131/127	0.842	63	[1.047]		129/128	1.105	63	[1.117]		130/128	1.28
418	gi|363742810	PREDICTED: ubiquitin associated protein 2-like [Gallus gallus]	1437	143722	51	46	18	16	18.5	6.63	0.6	Quantitation summary for protein	129/126	0.917	48	1.16	*	130/126	0.897	48	[1.302]		131/126	0.738	48	1.192	*	129/127	1.519	48	1.106	*	130/127	1.458	48	1.117	*	131/127	1.235	48	1.12	*	129/128	1.61	46	1.298	*	130/128	1.523
419	gi|363734601	PREDICTED: macrophage-expressed gene 1 protein-like [Gallus gallus]	1437	85681	54	47	19	16	36.7	6.49	1.37	Quantitation summary for protein	129/126	0.703	50	1.086	*	130/126	0.757	50	1.155	*	131/126	0.89	50	1.113	*	129/127	0.822	50	1.095	*	130/127	0.869	50	1.079	*	131/127	1.052	50	1.069	*	129/128	0.68	51	1.197	*	130/128	0.718
420	gi|53127800	hypothetical protein RCJMB04_3g21 [Gallus gallus]	1436	40594	64	48	17	12	47.1	5.82	4.17	Quantitation summary for protein	129/126	0.839	54	1.074	*	130/126	0.695	53	1.111	*	131/126	0.713	54	[1.073]		129/127	1.22	54	[1.071]		130/127	0.988	54	[1.080]		131/127	1.044	53	[1.057]		129/128	1.501	50	[1.110]		130/128	1.213
421	gi|118103338	PREDICTED: epidermal growth factor receptor pathway substrate 15-like 1 [Gallus gallus]	1432	114854	48	47	17	17	27.4	5.02	0.91	Quantitation summary for protein	129/126	1.047	47	[1.090]		130/126	1.004	47	[1.155]		131/126	0.962	47	[1.102]		129/127	1.126	47	1.056	*	130/127	1.06	47	1.063	*	131/127	1.046	47	1.035	*	129/128	1.469	47	[1.153]		130/128	1.381
422	gi|53127442	hypothetical protein RCJMB04_2h4 [Gallus gallus]	1432	67036	44	43	15	15	29.7	8.81	1.15	Quantitation summary for protein	129/126	1.231	43	1.072	*	130/126	1.407	43	1.099	*	131/126	1.259	43	1.068	*	129/127	0.92	43	1.03	*	130/127	1.031	43	1.032	*	131/127	0.95	43	1.03	*	129/128	0.428	43	1.089	*	130/128	0.479
423	gi|297567	integrin beta 2 subunit (CD18) [Gallus gallus]	1428	101453	71	48	26	17	30.2	5.47	1.43	Quantitation summary for protein	129/126	0.745	60	[1.073]		130/126	0.682	60	[1.120]		131/126	0.7	60	[1.085]		129/127	0.955	60	1.046	*	130/127	0.858	60	[1.036]		131/127	0.906	60	[1.035]		129/128	0.547	60	1.093	*	130/128	0.491
424	gi|118082912	PREDICTED: tRNA-splicing ligase RtcB homolog [Gallus gallus]	1426	63053	58	50	25	24	53.5	6.79	4.63	Quantitation summary for protein	129/126	1.038	55	[1.079]		130/126	1.164	55	1.154	*	131/126	0.951	55	1.096	*	129/127	1.023	55	1.046	*	130/127	1.125	55	[1.051]		131/127	0.945	54	1.034	*	129/128	0.976	55	[1.158]		130/128	1.072
425	gi|363739855	PREDICTED: aldehyde dehydrogenase, mitochondrial isoform 2 [Gallus gallus]	1418	65575	69	56	26	22	47.4	7.92	2.93	Quantitation summary for protein	129/126	1.12	53	1.097	*	130/126	1.618	53	1.182	*	131/126	1.058	53	1.101	*	129/127	0.882	55	1.06	*	130/127	1.25	55	1.063	*	131/127	0.842	55	1.056	*	129/128	0.693	55	[1.202]		130/128	0.982
426	gi|53130752	hypothetical protein RCJMB04_9n21 [Gallus gallus]	1412	45435	87	66	25	20	51.6	6.48	14.45	Quantitation summary for protein	129/126	1.188	75	[1.091]		130/126	0.984	75	[1.155]		131/126	0.925	75	[1.092]		129/127	1.272	75	1.045	*	130/127	1.033	75	1.05	*	131/127	1	75	[1.034]		129/128	1.68	75	[1.136]		130/128	1.363
427	gi|60098603	hypothetical protein RCJMB04_3p13 [Gallus gallus]	1412	111055	50	46	18	17	22.5	5.32	0.95	Quantitation summary for protein	129/126	0.9	41	1.055	*	130/126	0.942	42	[1.078]		131/126	1.119	42	[1.070]		129/127	0.898	43	1.047	*	130/127	0.986	44	1.044	*	131/127	1.201	44	1.043	*	129/128	0.448	44	1.075	*	130/128	0.47
428	gi|118092574	PREDICTED: cell division cycle and apoptosis regulator protein 1 [Gallus gallus]	1412	157565	60	52	24	20	19.9	5.63	0.74	Quantitation summary for protein	129/126	0.871	55	[1.089]		130/126	0.744	54	[1.128]		131/126	0.812	55	[1.090]		129/127	1.155	55	[1.060]		130/127	0.967	54	[1.056]		131/127	1.088	55	[1.041]		129/128	1.33	55	[1.121]		130/128	1.112
429	gi|118104137	PREDICTED: ubiquilin-1 isoform 2 [Gallus gallus]	1409	65122	46	44	12	11	29.7	5.15	1.55	Quantitation summary for protein	129/126	1.211	35	1.167	*	130/126	1.018	35	1.228		131/126	1.072	35	1.18	*	129/127	1.315	35	1.101	*	130/127	1.084	35	1.067	*	131/127	1.176	35	1.074	*	129/128	2.013	34	[1.153]		130/128	1.658
430	gi|63434	unnamed protein product [Gallus gallus]	1408	18955	45	43	6	6	41.3	10.27	7.37	Quantitation summary for protein	129/126	0.605	29	1.121	*	130/126	0.969	30	1.115		131/126	0.776	29	[1.128]		129/127	0.374	29	[1.167]		130/127	0.589	30	1.135	*	131/127	0.484	29	1.124	*	129/128	1.389	28	1.112	*	130/128	2.183
431	gi|363743079	PREDICTED: ATP synthase subunit b, mitochondrial [Gallus gallus]	1408	34198	64	54	15	13	39.6	9.23	4.81	Quantitation summary for protein	129/126	0.822	59	[1.113]		130/126	0.858	59	[1.176]		131/126	0.894	59	[1.124]		129/127	0.944	59	1.038	*	130/127	0.965	59	[1.065]		131/127	1.036	59	[1.035]		129/128	0.597	59	[1.116]		130/128	0.61
432	gi|63553	unnamed protein product [Gallus gallus]	1407	51091	63	51	18	15	47.8	6.5	4.41	Quantitation summary for protein	129/126	0.682	55	1.131	*	130/126	2.515	55	[1.292]		131/126	0.307	54	[1.225]		129/127	3.291	53	1.226	*	130/127	11.811	53	1.314	*	131/127	1.501	53	1.129	*	129/128	1.708	55	[1.230]		130/128	6.174
433	gi|363734901	PREDICTED: fermitin family homolog 2 isoform 1 [Gallus gallus]	1403	92649	69	55	21	16	37.2	6.22	1.22	Quantitation summary for protein	129/126	1.155	50	[1.079]		130/126	1.422	51	1.115	*	131/126	1.149	51	1.079	*	129/127	0.775	49	1.049	*	130/127	0.934	52	[1.039]		131/127	0.777	51	1.042	*	129/128	0.376	52	[1.136]		130/128	0.454
434	gi|53127432	hypothetical protein RCJMB04_2f16 [Gallus gallus]	1401	108525	54	51	22	21	27.9	5.97	0.98	Quantitation summary for protein	129/126	1.133	41	[1.051]		130/126	1.267	41	1.08	*	131/126	1.139	41	1.055	*	129/127	0.967	41	[1.038]		130/127	1.061	41	[1.056]		131/127	0.982	41	[1.034]		129/128	0.509	41	[1.099]		130/128	0.558
435	gi|53129367	hypothetical protein RCJMB04_5k5 [Gallus gallus]	1400	108121	73	50	26	18	30.6	5.5	1.17	Quantitation summary for protein	129/126	0.937	55	[1.087]		130/126	0.871	54	[1.103]		131/126	0.905	54	[1.081]		129/127	0.941	53	1.044	*	130/127	0.848	55	[1.063]		131/127	0.908	52	1.041	*	129/128	0.583	55	[1.118]		130/128	0.528
436	gi|304386	growth factor receptor-binding protein 2 [Gallus gallus]	1399	29070	47	34	16	11	70	5.87	4.66	Quantitation summary for protein	129/126	1.039	41	1.046	*	130/126	0.955	41	[1.083]		131/126	0.959	41	[1.048]		129/127	1.112	41	[1.063]		130/127	1.002	41	[1.058]		131/127	1.036	41	[1.044]		129/128	1.304	41	1.103	*	130/128	1.174
437	gi|22506897	UDP-glucose pyrophosphorylase [Gallus gallus]	1397	67058	60	53	23	20	44.7	8.41	3.2	Quantitation summary for protein	129/126	1.205	9	[1.093]		130/126	1.04	9	1.131		131/126	1.048	9	1.106		129/127	1.209	9	1.097	*	130/127	1.024	9	1.137		131/127	1.062	9	1.067	*	129/128	1.458	9	1.081	*	130/128	1.233
438	gi|53127312	hypothetical protein RCJMB04_1m9 [Gallus gallus]	1396	87138	62	53	17	12	27.4	10.37	1.09	Quantitation summary for protein	129/126	0.681	54	[1.099]		130/126	0.804	54	[1.154]		131/126	0.844	54	[1.099]		129/127	0.861	55	1.055	*	130/127	0.997	55	1.051		131/127	1.078	55	1.048	*	129/128	1.258	55	1.145	*	130/128	1.454
439	gi|112981	RecName: Full=Aspartate aminotransferase, mitochondrial; Short=mAspAT; AltName: Full=Glutamate oxaloacetate transaminase 2; AltName: Full=Kynurenine aminotransferase 4; AltName: Full=Kynurenine aminotransferase IV; AltName: Full=Kynurenine--oxogluta	1396	54142	71	59	25	23	46.1	9.38	5.23	Quantitation summary for protein	129/126	1.133	61	[1.068]		130/126	1.041	61	[1.090]		131/126	1.107	61	[1.064]		129/127	1.072	61	[1.036]		130/127	0.966	61	[1.046]		131/127	1.058	61	1.029	*	129/128	0.841	61	[1.123]		130/128	0.757
440	gi|53131814	hypothetical protein RCJMB04_12d24 [Gallus gallus]	1395	77735	59	48	16	13	30.5	5.26	1.02	Quantitation summary for protein	129/126	1.071	50	[1.097]		130/126	1.072	49	[1.174]		131/126	1.248	50	[1.115]		129/127	0.991	48	1.069		130/127	0.974	47	1.066	*	131/127	1.168	48	1.06	*	129/128	1.361	48	[1.102]		130/128	1.333
441	gi|53130454	hypothetical protein RCJMB04_7p8 [Gallus gallus]	1394	55610	62	57	23	21	48.1	6.49	3.21	Quantitation summary for protein	129/126	0.991	57	1.078		130/126	1.041	57	1.129	*	131/126	0.995	57	1.083		129/127	0.782	57	1.039	*	130/127	0.806	57	[1.044]		131/127	0.794	57	1.04	*	129/128	0.869	57	[1.106]		130/128	0.895
442	gi|3641556	fibrinogen gamma chain precursor [Gallus gallus]	1394	56598	54	48	15	13	36.1	5.48	1.77	Quantitation summary for protein	129/126	1.497	51	1.067	*	130/126	1.65	51	1.1	*	131/126	1.319	51	1.076	*	129/127	1.259	51	1.045	*	130/127	1.361	51	1.059	*	131/127	1.12	51	1.044	*	129/128	1.162	51	[1.071]		130/128	1.254
443	gi|790617	A1 isoform of vacuolar H+-ATPase subunit A [Gallus gallus]	1392	76796	62	49	28	23	42.8	5.51	2.51	Quantitation summary for protein	129/126	1.106	53	[1.079]		130/126	1.12	52	1.139	*	131/126	1.053	52	[1.097]		129/127	1.098	53	1.049	*	130/127	1.09	52	1.041	*	131/127	1.056	52	1.04	*	129/128	0.739	54	[1.143]		130/128	0.733
444	gi|118086936	PREDICTED: DNA replication licensing factor mcm4 [Gallus gallus]	1390	107763	51	40	21	18	31.9	7.03	0.99	Quantitation summary for protein	129/126	0.947	44	1.056	*	130/126	0.952	45	1.086	*	131/126	0.956	45	[1.113]		129/127	1.156	45	[1.049]		130/127	1.143	45	1.054	*	131/127	1.181	45	[1.053]		129/128	0.902	45	[1.130]		130/128	0.89
445	gi|60098595	hypothetical protein RCJMB04_3o14 [Gallus gallus]	1377	68350	49	45	16	14	32.6	5.07	1.44	Quantitation summary for protein	129/126	1.277	36	1.073	*	130/126	1.188	36	1.108	*	131/126	1.225	36	1.095	*	129/127	1.169	36	[1.054]		130/127	1.067	36	1.049	*	131/127	1.132	36	[1.062]		129/128	1.041	36	[1.070]		130/128	0.949
446	gi|53130868	hypothetical protein RCJMB04_10k21 [Gallus gallus]	1376	62759	45	39	16	14	35.5	6.66	1.78	Quantitation summary for protein	129/126	1.204	33	1.078	*	130/126	1.12	33	[1.109]		131/126	1.206	33	1.095	*	129/127	0.854	34	[1.059]		130/127	0.779	34	[1.058]		131/127	0.865	34	1.055	*	129/128	0.677	33	[1.230]		130/128	0.617
447	gi|53131507	hypothetical protein RCJMB04_11n24 [Gallus gallus]	1373	62803	55	52	17	17	52.2	8.85	2.4	Quantitation summary for protein	129/126	---	1	---		130/126	---	1	---		131/126	---	1	---		129/127	---	1	---		130/127	---	1	---		131/127	---	1	---		129/128	---	1	---		130/128	---
448	gi|304419	protein tyrosine phosphatase lambda [Gallus gallus]	1370	158875	72	60	22	19	15.8	5.55	0.7	Quantitation summary for protein	129/126	1.013	64	[1.132]		130/126	1.18	64	[1.178]		131/126	1.03	64	[1.146]		129/127	0.788	64	1.051	*	130/127	0.9	64	[1.070]		131/127	0.809	64	[1.057]		129/128	0.527	64	[1.097]		130/128	0.602
449	gi|50731694	PREDICTED: 2,4-dienoyl-CoA reductase, mitochondrial [Gallus gallus]	1370	41795	59	46	14	11	49.1	9.46	3.24	Quantitation summary for protein	129/126	0.897	50	[1.043]		130/126	0.884	50	[1.085]		131/126	0.877	50	[1.046]		129/127	0.999	51	[1.051]		130/127	0.968	52	[1.069]		131/127	0.986	52	[1.046]		129/128	1.488	51	[1.064]		130/128	1.441
450	gi|50754810	PREDICTED: catenin alpha-1 [Gallus gallus]	1368	117395	46	38	23	19	29.3	5.87	0.93	Quantitation summary for protein	129/126	0.944	36	1.062	*	130/126	1.126	36	[1.115]		131/126	1.062	36	1.073	*	129/127	0.869	34	[1.060]		130/127	1.019	34	1.055		131/127	0.988	34	[1.059]		129/128	0.555	35	[1.128]		130/128	0.649
451	gi|1127800	CDC42 [Gallus gallus]	1364	25726	66	54	11	11	45.5	6.15	6.94	Quantitation summary for protein	129/126	0.906	52	[1.451]		130/126	0.586	44	[1.576]		131/126	0.834	49	[1.476]		129/127	1.194	45	[1.169]		130/127	0.747	44	1.138	*	131/127	1.108	45	[1.155]		129/128	0.605	53	[1.359]		130/128	0.378
452	gi|226874900	proteasome subunit alpha type-2 [Gallus gallus]	1363	29455	44	38	15	11	65	6.97	6.66	Quantitation summary for protein	129/126	1.128	41	[1.105]		130/126	1.253	41	[1.129]		131/126	1.075	41	[1.104]		129/127	1.017	41	1.039	*	130/127	1.108	41	1.054	*	131/127	0.979	41	1.043	*	129/128	1.469	40	[1.113]		130/128	1.598
453	gi|53127778	hypothetical protein RCJMB04_3f20 [Gallus gallus]	1363	55749	57	50	19	16	48.2	8.1	2.54	Quantitation summary for protein	129/126	1.176	53	[1.138]		130/126	1.316	53	1.204	*	131/126	1.156	53	1.139	*	129/127	0.946	53	[1.060]		130/127	1.038	53	1.069	*	131/127	0.939	53	1.049	*	129/128	1.154	53	[1.153]		130/128	1.265
454	gi|10505269	integrin-linked kinase [Gallus gallus]	1363	58759	58	54	15	14	32.3	8.36	2.7	Quantitation summary for protein	129/126	1.23	56	1.08	*	130/126	1.286	56	1.098	*	131/126	1.113	56	1.083	*	129/127	0.923	55	1.041	*	130/127	0.947	56	[1.046]		131/127	0.844	56	1.049	*	129/128	0.709	56	[1.064]		130/128	0.726
455	gi|272753691	aminopeptidase N [Gallus gallus]	1361	115344	56	50	23	21	27.7	5.03	1.25	Quantitation summary for protein	129/126	2.107	4	1.049	*	130/126	2.234	4	[1.864]		131/126	1.918	4	1.16	*	129/127	1.208	4	[1.455]		130/127	1.256	4	1.243		131/127	1.111	4	[1.313]		129/128	1.564	4	2.013		130/128	1.624
456	gi|314122256	sec1 family domain-containing protein 1 [Gallus gallus]	1361	82206	37	37	11	11	26.7	5.74	0.8	Quantitation summary for protein	129/126	1.171	37	1.083	*	130/126	1.106	37	1.084	*	131/126	1.31	37	1.096	*	129/127	1.107	37	1.05	*	130/127	1.025	37	1.051	*	131/127	1.25	37	1.049	*	129/128	0.627	37	[1.087]		130/128	0.58
457	gi|473701	Iron responsive element binding protein [Gallus gallus]	1360	111472	72	58	26	22	34.5	6.95	1.25	Quantitation summary for protein	129/126	1.187	59	1.082	*	130/126	1.184	59	[1.134]		131/126	1.162	59	1.091	*	129/127	0.915	60	[1.062]		130/127	0.9	60	[1.049]		131/127	0.905	60	[1.052]		129/128	0.641	60	[1.099]		130/128	0.63
458	gi|53133416	hypothetical protein RCJMB04_16g4 [Gallus gallus]	1360	64484	74	51	24	18	43.7	6.07	2.64	Quantitation summary for protein	129/126	1.303	63	[1.121]		130/126	1.362	63	[1.187]		131/126	1.206	63	[1.133]		129/127	1.044	63	[1.059]		130/127	1.07	63	[1.041]		131/127	0.976	63	[1.051]		129/128	0.783	63	[1.125]		130/128	0.802
459	gi|118099965	PREDICTED: ATP synthase subunit d, mitochondrial isoform 1 [Gallus gallus]	1360	21998	64	57	16	14	78.3	8.73	25.21	Quantitation summary for protein	129/126	0.776	58	[1.192]		130/126	0.604	58	[1.325]		131/126	0.716	58	[1.218]		129/127	1.282	58	1.088	*	130/127	0.979	58	[1.147]		131/127	1.195	58	1.078	*	129/128	2.515	57	[1.198]		130/128	1.916
460	gi|60098675	hypothetical protein RCJMB04_5e12 [Gallus gallus]	1359	32509	81	74	17	16	50.6	4.84	12.8	Quantitation summary for protein	129/126	1.064	19	[1.419]		130/126	1.472	19	[1.602]		131/126	1.038	19	[1.431]		129/127	0.838	19	1.085	*	130/127	1.143	18	1.089	*	131/127	0.826	18	1.053	*	129/128	0.601	19	[1.353]		130/128	0.815
461	gi|60098701	hypothetical protein RCJMB04_6f4 [Gallus gallus]	1358	180080	48	35	16	13	13	7.7	0.43	Quantitation summary for protein	129/126	0.848	32	1.139	*	130/126	0.9	32	1.209	*	131/126	1.093	32	[1.148]		129/127	0.939	32	1.154	*	130/127	0.977	32	1.127		131/127	1.221	32	1.13	*	129/128	0.587	32	1.264	*	130/128	0.61
462	gi|460907	fatty acid synthase [Gallus gallus]	1356	307192	58	42	26	20	13.1	5.94	0.3	Quantitation summary for protein	129/126	---	1	---		130/126	---	1	---		131/126	---	1	---		129/127	---	1	---		130/127	---	1	---		131/127	---	1	---		129/128	---	1	---		130/128	---
463	gi|53128721	hypothetical protein RCJMB04_5b19 [Gallus gallus]	1355	33148	46	41	11	10	40.4	8.68	2.8	Quantitation summary for protein	129/126	1.1	7	1.066	*	130/126	0.974	7	1.135		131/126	1.156	7	1.065	*	129/127	1.082	7	[1.070]		130/127	0.939	7	1.03	*	131/127	1.149	7	1.057	*	129/128	0.917	7	1.204		130/128	0.795
464	gi|50764028	PREDICTED: aldo-keto reductase family 1 member B10 [Gallus gallus]	1354	42291	66	52	15	13	44.9	6.8	3.5	Quantitation summary for protein	129/126	0.907	4	[1.248]		130/126	1.243	4	[1.484]		131/126	0.89	4	1.247		129/127	0.922	4	[1.102]		130/127	1.239	4	1.11	*	131/127	0.913	4	1.184		129/128	0.595	4	[1.326]		130/128	1.022
465	gi|53136744	hypothetical protein RCJMB04_33e1 [Gallus gallus]	1353	79928	70	56	22	18	39.2	6.56	1.52	Quantitation summary for protein	129/126	1.176	60	1.057	*	130/126	1.223	60	[1.090]		131/126	1.059	60	1.061	*	129/127	0.955	60	[1.041]		130/127	0.974	60	1.028	*	131/127	0.868	60	[1.033]		129/128	0.544	60	[1.098]		130/128	0.554
466	gi|313760671	ras suppressor protein 1 [Gallus gallus]	1352	36603	51	41	15	13	51.6	8.48	5.72	Quantitation summary for protein	129/126	0.902	44	[1.118]		130/126	0.814	44	[1.224]		131/126	0.813	43	[1.140]		129/127	1.117	44	[1.083]		130/127	0.989	44	[1.073]		131/127	1.017	43	[1.061]		129/128	1.443	44	[1.139]		130/128	1.276
467	gi|363743385	PREDICTED: LOW QUALITY PROTEIN: 26S proteasome non-ATPase regulatory subunit 11 [Gallus gallus]	1350	63139	45	41	19	17	36.8	5.96	2.38	Quantitation summary for protein	129/126	0.969	43	[1.073]		130/126	1.065	43	1.156	*	131/126	0.993	43	[1.084]		129/127	1.029	43	1.055	*	130/127	1.108	43	[1.061]		131/127	1.065	43	[1.050]		129/128	0.688	42	[1.129]		130/128	0.74
468	gi|53127099	hypothetical protein RCJMB04_1i23 [Gallus gallus]	1350	37899	76	61	21	18	61.8	9.89	12.46	Quantitation summary for protein	129/126	0.919	70	1.11	*	130/126	0.88	69	[1.194]		131/126	0.908	70	[1.116]		129/127	1.041	69	[1.081]		130/127	0.979	69	[1.085]		131/127	1.039	69	[1.059]		129/128	1.821	69	1.122	*	130/128	1.709
469	gi|4514720	ezrin [Gallus gallus]	1346	82271	103	73	30	24	37.4	5.9	4.16	Quantitation summary for protein	129/126	1.423	30	1.097	*	130/126	1.56	30	1.131	*	131/126	1.412	30	1.09	*	129/127	1.152	30	1.055	*	130/127	1.239	30	1.054	*	131/127	1.153	29	1.036	*	129/128	1.26	30	[1.150]		130/128	1.353
470	gi|53133620	hypothetical protein RCJMB04_18k11 [Gallus gallus]	1337	29887	66	56	15	14	58.9	5.72	6.44	Quantitation summary for protein	129/126	0.811	58	[1.134]		130/126	0.671	58	[1.221]		131/126	0.734	58	1.144	*	129/127	1.072	58	[1.056]		130/127	0.869	58	[1.060]		131/127	0.98	58	1.052	*	129/128	1.653	58	[1.167]		130/128	1.34
471	gi|53134115	hypothetical protein RCJMB04_22k15 [Gallus gallus]	1335	62021	73	51	19	17	38.9	6.51	3.71	Quantitation summary for protein	129/126	1.154	58	[1.100]		130/126	0.799	59	1.142	*	131/126	0.866	59	[1.108]		129/127	1.388	59	1.053	*	130/127	0.943	60	1.061	*	131/127	1.052	60	1.045	*	129/128	1.07	59	1.146	*	130/128	0.725
472	gi|363743617	PREDICTED: lon protease homolog, mitochondrial [Gallus gallus]	1335	111460	58	49	23	19	28.5	5.8	1.06	Quantitation summary for protein	129/126	1.264	49	1.076	*	130/126	1.391	49	1.096	*	131/126	1.272	49	1.072	*	129/127	0.858	49	1.043	*	130/127	0.926	49	1.039	*	131/127	0.872	49	1.05	*	129/128	0.58	49	[1.099]		130/128	0.625
473	gi|363742669	PREDICTED: hepatoma-derived growth factor [Gallus gallus]	1333	34653	91	63	20	16	60.3	5.1	13.18	Quantitation summary for protein	129/126	1.259	75	1.094	*	130/126	1.439	75	[1.147]		131/126	1.081	75	1.1	*	129/127	0.995	74	1.05		130/127	1.115	74	[1.055]		131/127	0.863	74	1.041	*	129/128	0.991	75	[1.123]		130/128	1.109
474	gi|135767	RecName: Full=Thioredoxin; Short=Trx	1332	15186	87	69	12	10	56.2	5.1	45.13	Quantitation summary for protein	129/126	1.938	73	[1.255]		130/126	1.776	73	[1.365]		131/126	1.631	73	[1.255]		129/127	1.226	73	[1.076]		130/127	1.102	73	[1.077]		131/127	1.042	73	[1.066]		129/128	2.186	73	[1.153]		130/128	1.963
475	gi|294861490	fascin 1 [Gallus gallus]	1329	62384	53	46	17	16	34.9	6.8	2.61	Quantitation summary for protein	129/126	0.992	49	1.086		130/126	1.007	49	[1.133]		131/126	0.902	49	1.098	*	129/127	0.637	49	[1.068]		130/127	0.634	49	1.056	*	131/127	0.585	49	1.069	*	129/128	0.833	49	[1.122]		130/128	0.829
476	gi|363742805	PREDICTED: uncharacterized protein LOC100857958 [Gallus gallus]	1328	79826	42	38	12	11	22	5.32	0.9	Quantitation summary for protein	129/126	0.826	38	[1.107]		130/126	0.794	38	[1.137]		131/126	0.77	38	[1.111]		129/127	0.997	37	1.046		130/127	0.945	38	[1.044]		131/127	0.944	37	1.03	*	129/128	1.134	37	1.067	*	130/128	1.061
477	gi|118099331	PREDICTED: formin-binding protein 1 [Gallus gallus]	1326	84910	76	58	27	21	40.5	5.48	1.68	Quantitation summary for protein	129/126	1.118	59	1.075	*	130/126	1.15	61	[1.129]		131/126	1.021	60	[1.086]		129/127	0.906	61	1.04	*	130/127	0.956	62	[1.056]		131/127	0.874	60	1.036	*	129/128	0.693	61	[1.130]		130/128	0.732
478	gi|53136506	hypothetical protein RCJMB04_30a22 [Gallus gallus]	1321	88556	46	42	15	13	29.6	6.65	0.85	Quantitation summary for protein	129/126	1.17	43	1.075	*	130/126	1.152	43	1.1	*	131/126	1.041	43	1.076	*	129/127	0.943	43	1.047	*	130/127	0.91	43	[1.044]		131/127	0.847	43	[1.048]		129/128	0.727	43	1.092	*	130/128	0.701
479	gi|363741459	PREDICTED: protein-glutamine gamma-glutamyltransferase E [Gallus gallus]	1320	88930	48	41	17	15	27.6	5.6	1.06	Quantitation summary for protein	129/126	2.219	44	1.148	*	130/126	1.362	44	1.241	*	131/126	0.916	44	1.138	*	129/127	3.609	44	1.145	*	130/127	2.172	44	1.107	*	131/127	1.507	43	1.069	*	129/128	2.1	44	1.198	*	130/128	1.262
480	gi|118098725	PREDICTED: gamma-glutamyltransferase 5 [Gallus gallus]	1320	70264	54	46	17	14	30.9	8.88	1.61	Quantitation summary for protein	129/126	0.977	51	1.05	*	130/126	0.952	51	1.065	*	131/126	0.932	51	1.052	*	129/127	1.037	51	1.034	*	130/127	0.99	51	1.031	*	131/127	0.998	51	1.031		129/128	0.399	50	1.079	*	130/128	0.382
481	gi|363732251	PREDICTED: glutathione S-transferase-like [Gallus gallus]	1320	30477	92	63	16	13	68.8	7.85	12.26	Quantitation summary for protein	129/126	1.119	29	[1.114]		130/126	0.779	29	[1.107]		131/126	0.868	28	[1.102]		129/127	1.121	28	1.045	*	130/127	0.757	28	[1.066]		131/127	0.879	28	1.048	*	129/128	2.626	27	[1.174]		130/128	1.775
482	gi|363736344	PREDICTED: LOW QUALITY PROTEIN: protein PRRC2C-like [Gallus gallus]	1317	333840	71	58	28	25	10.4	9.07	0.34	Quantitation summary for protein	129/126	0.894	66	[1.056]		130/126	0.927	66	[1.104]		131/126	0.869	66	[1.064]		129/127	1.371	66	[1.055]		130/127	1.393	66	1.04	*	131/127	1.345	66	[1.057]		129/128	1.155	66	[1.121]		130/128	1.173
483	gi|118101401	PREDICTED: voltage-dependent anion-selective channel protein 3 [Gallus gallus]	1314	36742	48	40	13	10	56.3	8.85	4.16	Quantitation summary for protein	129/126	1.093	44	[1.107]		130/126	1.308	44	[1.128]		131/126	1.226	44	1.107	*	129/127	0.932	44	1.067	*	130/127	1.093	44	1.049	*	131/127	1.055	44	1.043	*	129/128	1.771	44	1.144	*	130/128	2.076
484	gi|84105269	eukaryotic translation initiation factor 5B [Gallus gallus]	1313	179778	54	49	23	21	25	5.41	0.51	Quantitation summary for protein	129/126	0.963	50	[1.092]		130/126	1.036	50	[1.143]		131/126	0.941	50	1.107	*	129/127	1.088	50	1.06	*	130/127	1.149	50	1.057	*	131/127	1.075	50	[1.045]		129/128	1.01	50	[1.111]		130/128	1.064
485	gi|118095590	PREDICTED: reticulocalbin-2 [Gallus gallus]	1309	39814	53	48	16	13	40.6	4.43	4.34	Quantitation summary for protein	129/126	1.252	51	[1.079]		130/126	1.439	51	[1.159]		131/126	1.19	51	[1.090]		129/127	1.064	50	1.054	*	130/127	1.205	51	[1.072]		131/127	1.026	51	1.056	*	129/128	1.275	51	[1.181]		130/128	1.435
486	gi|2558539	ubiquitin-ribosomal protein fusion protein [Gallus gallus]	1309	19140	121	74	9	6	51.6	9.87	2.67	Quantitation summary for protein	129/126	1.918	7	[1.215]		130/126	2.26	7	[1.190]		131/126	1.921	7	1.171	*	129/127	1.048	7	1.112		130/127	1.211	7	1.095	*	131/127	1.06	7	1.105		129/128	1.382	7	1.17	*	130/128	1.595
487	gi|118082523	PREDICTED: small nuclear ribonucleoprotein F [Gallus gallus]	1308	11151	43	43	3	3	24.4	4.7	4.07	Quantitation summary for protein	129/126	0.759	39	1.061	*	130/126	0.826	40	1.072	*	131/126	0.75	40	[1.090]		129/127	0.814	40	[1.076]		130/127	0.869	40	[1.073]		131/127	0.81	40	1.067	*	129/128	1.337	38	1.179	*	130/128	1.424
488	gi|302488427	Sjogren syndrome antigen B (autoantigen La) isoform 1 [Gallus gallus]	1304	61025	65	53	23	18	39.1	8.05	3.58	Quantitation summary for protein	129/126	0.987	57	1.083		130/126	0.812	57	1.148	*	131/126	0.886	57	1.087	*	129/127	1.111	57	[1.053]		130/127	0.897	57	1.055	*	131/127	0.997	56	1.037		129/128	1.213	57	[1.208]		130/128	0.978
489	gi|1448967	CROC-1B, partial [Gallus gallus]	1299	19087	38	33	8	8	50	8.59	8.73	Quantitation summary for protein	129/126	1.261	10	1.111	*	130/126	1.232	10	1.116	*	131/126	1.282	10	1.088	*	129/127	0.914	10	1.039	*	130/127	0.875	10	1.057	*	131/127	0.938	10	1.05	*	129/128	1.273	10	1.06	*	130/128	1.218
490	gi|444741647	endoplasmic reticulum resident protein 29 precursor [Gallus gallus]	1296	36538	57	46	19	14	46.8	7.63	7.04	Quantitation summary for protein	129/126	0.996	52	[1.092]		130/126	0.999	52	[1.208]		131/126	0.996	51	1.097		129/127	1.275	52	1.058	*	130/127	1.253	52	[1.066]		131/127	1.269	52	1.045	*	129/128	1.278	52	1.164	*	130/128	1.255
491	gi|485265	proteasome 28 kDa subunit homolog, similar to Swiss-Prot Accession Number P22769 [Gallus gallus]	1296	33955	51	43	10	9	37.3	8.93	3.44	Quantitation summary for protein	129/126	1.179	46	1.052	*	130/126	1.285	46	[1.082]		131/126	1.146	46	[1.058]		129/127	0.99	46	1.037		130/127	1.059	46	[1.041]		131/127	0.973	46	[1.036]		129/128	1.643	46	[1.107]		130/128	1.755
492	gi|2827444	nucleoside diphosphate kinase [Gallus gallus]	1289	20198	75	58	10	8	73.2	7.72	20.74	Quantitation summary for protein	129/126	1.059	58	[1.086]		130/126	1.162	58	[1.166]		131/126	1.083	58	[1.098]		129/127	0.947	59	1.062	*	130/127	1.019	59	1.062	*	131/127	0.978	59	1.051	*	129/128	1.66	59	[1.140]		130/128	1.784
493	gi|363739175	PREDICTED: probable ATP-dependent RNA helicase DDX46 [Gallus gallus]	1286	141995	53	50	26	24	27.2	9.31	0.77	Quantitation summary for protein	129/126	1.056	51	[1.076]		130/126	1.247	51	[1.144]		131/126	1.141	51	[1.085]		129/127	0.98	50	1.043	*	130/127	1.137	51	1.049	*	131/127	1.071	51	[1.042]		129/128	0.757	51	[1.100]		130/128	0.876
494	gi|363729530	PREDICTED: hemopexin [Gallus gallus]	1285	45365	51	42	16	15	67.1	5.36	3.37	Quantitation summary for protein	129/126	2.218	46	1.175	*	130/126	1.764	46	1.138	*	131/126	1.658	46	1.153	*	129/127	2.045	47	1.095	*	130/127	1.598	47	1.091	*	131/127	1.543	47	1.074	*	129/128	3.109	46	[1.178]		130/128	2.423
495	gi|381342486	40S ribosomal protein S10 [Gallus gallus]	1283	22106	69	54	15	12	51.5	10.15	15.88	Quantitation summary for protein	129/126	1.169	58	[1.206]		130/126	1.041	58	[1.292]		131/126	1.16	58	[1.231]		129/127	1.292	58	1.093	*	130/127	1.128	58	[1.100]		131/127	1.295	58	[1.076]		129/128	1.498	58	1.129	*	130/128	1.306
496	gi|363739222	PREDICTED: septin-8 [Gallus gallus]	1282	67920	71	55	17	11	24.8	7.97	1.7	Quantitation summary for protein	129/126	0.958	14	1.102		130/126	0.996	14	1.169		131/126	0.9	14	1.121	*	129/127	1.067	14	1.162		130/127	1.087	14	1.103	*	131/127	1.013	14	1.105		129/128	1.071	14	1.187		130/128	1.09
497	gi|1399943	26S ATPase complex subunit 4 [Gallus gallus]	1282	59885	54	45	17	16	41.8	5.87	2.07	Quantitation summary for protein	129/126	1.061	44	[1.087]		130/126	0.854	44	[1.219]		131/126	1.051	45	[1.107]		129/127	1.061	44	[1.062]		130/127	0.838	44	[1.090]		131/127	1.062	45	1.057	*	129/128	0.842	43	[1.191]		130/128	0.665
498	gi|53134140	hypothetical protein RCJMB04_22k18 [Gallus gallus]	1281	58416	48	41	13	13	39.7	4.9	2.16	Quantitation summary for protein	129/126	1.146	45	1.067	*	130/126	1.198	46	[1.112]		131/126	1.107	46	1.094	*	129/127	0.984	46	1.052	*	130/127	0.916	46	[1.058]		131/127	0.872	46	1.062	*	129/128	0.675	45	1.069	*	130/128	0.658
499	gi|53127646	hypothetical protein RCJMB04_2n5 [Gallus gallus]	1280	48879	62	55	18	17	45	5.27	5.23	Quantitation summary for protein	129/126	0.872	50	[1.149]		130/126	0.887	50	[1.218]		131/126	0.832	50	[1.163]		129/127	0.854	50	1.068	*	130/127	0.852	50	1.052	*	131/127	0.823	50	1.068	*	129/128	0.897	50	[1.125]		130/128	0.894
500	gi|60098451	hypothetical protein RCJMB04_2g14 [Gallus gallus]	1277	121760	41	38	14	13	16.4	5.89	0.57	Quantitation summary for protein	129/126	1.128	40	1.101	*	130/126	1.125	40	1.118	*	131/126	1.176	40	1.103	*	129/127	0.847	40	1.037	*	130/127	0.828	40	1.045	*	131/127	0.891	40	1.037	*	129/128	0.389	40	1.092	*	130/128	0.38
501	gi|53133816	hypothetical protein RCJMB04_20k1 [Gallus gallus]	1277	36381	72	67	15	13	46.3	10.83	6.41	Quantitation summary for protein	129/126	0.961	69	1.094	*	130/126	0.734	69	[1.148]		131/126	0.874	69	[1.109]		129/127	1.015	69	[1.066]		130/127	0.76	69	[1.068]		131/127	0.931	69	[1.049]		129/128	0.766	69	[1.101]		130/128	0.573
502	gi|53133834	hypothetical protein RCJMB04_20m7 [Gallus gallus]	1271	55777	42	36	12	10	24.9	6.55	1.23	Quantitation summary for protein	129/126	0.889	39	[1.069]		130/126	0.834	39	[1.105]		131/126	0.73	39	[1.066]		129/127	1.025	39	[1.043]		130/127	0.943	39	[1.045]		131/127	0.851	39	[1.044]		129/128	1.436	39	1.11	*	130/128	1.319
503	gi|118101780	PREDICTED: adenylate kinase 2, mitochondrial [Gallus gallus]	1270	29748	53	49	15	13	62.9	8.39	5.74	Quantitation summary for protein	129/126	0.979	49	[1.101]		130/126	0.934	49	[1.127]		131/126	0.924	49	[1.103]		129/127	1.006	49	[1.054]		130/127	0.941	49	[1.054]		131/127	0.959	49	[1.053]		129/128	1.222	49	[1.091]		130/128	1.153
504	gi|65306315	EF hand-containing protein 1 [Gallus gallus]	1267	31321	50	38	16	12	63.9	5.07	4.56	Quantitation summary for protein	129/126	0.885	38	[1.129]		130/126	1.387	38	[1.252]		131/126	0.909	39	[1.152]		129/127	0.648	39	1.103	*	130/127	1.001	39	1.056		131/127	0.674	40	1.079	*	129/128	0.854	39	[1.141]		130/128	1.318
505	gi|438525	progesterone receptor, partial [Gallus gallus]	1264	19837	36	34	5	4	32.2	4.22	2.5	Quantitation summary for protein	129/126	1.457	35	1.095	*	130/126	1.64	35	[1.168]		131/126	1.565	35	[1.103]		129/127	0.887	35	[1.061]		130/127	0.979	35	[1.049]		131/127	0.962	35	[1.053]		129/128	0.899	35	[1.187]		130/128	0.991
506	gi|363730685	PREDICTED: NADH dehydrogenase [ubiquinone] flavoprotein 2, mitochondrial isoform 2 [Gallus gallus]	1262	31213	49	44	9	8	41.2	8.16	2.37	Quantitation summary for protein	129/126	1.081	44	[1.098]		130/126	1.191	44	[1.157]		131/126	1.038	43	[1.102]		129/127	0.97	45	1.05	*	130/127	1.051	45	1.061	*	131/127	0.94	44	1.054	*	129/128	1.24	44	[1.153]		130/128	1.342
507	gi|53136702	hypothetical protein RCJMB04_32k7 [Gallus gallus]	1261	42010	47	42	15	13	47.4	6.5	2.92	Quantitation summary for protein	129/126	0.859	43	1.109	*	130/126	0.853	43	[1.205]		131/126	0.751	43	[1.140]		129/127	1.09	43	[1.073]		130/127	1.061	43	[1.051]		131/127	0.961	43	[1.042]		129/128	1.209	43	[1.117]		130/128	1.175
508	gi|53133882	hypothetical protein RCJMB04_21j5 [Gallus gallus]	1258	52830	83	59	23	17	55.5	6.1	4.78	Quantitation summary for protein	129/126	1.114	75	[1.067]		130/126	1.078	75	[1.100]		131/126	1.164	75	[1.076]		129/127	1.007	75	[1.038]		130/127	0.955	75	1.044	*	131/127	1.062	75	[1.035]		129/128	1.159	74	1.08	*	130/128	1.097
509	gi|53136456	hypothetical protein RCJMB04_29e19 [Gallus gallus]	1256	51226	53	43	16	15	46.3	4.51	3.2	Quantitation summary for protein	129/126	1.128	42	[1.080]		130/126	1.477	42	[1.148]		131/126	1.05	42	1.099	*	129/127	1.005	42	1.061		130/127	1.29	42	1.048	*	131/127	0.945	42	[1.065]		129/128	0.889	42	1.169	*	130/128	1.14
510	gi|363741140	PREDICTED: 60S ribosomal protein L23a [Gallus gallus]	1256	24749	64	54	10	8	49.7	10.44	6.59	Quantitation summary for protein	129/126	1.086	60	[1.201]		130/126	0.893	59	[1.320]		131/126	1.198	60	[1.238]		129/127	1.204	59	1.072	*	130/127	0.967	59	[1.112]		131/127	1.341	59	[1.063]		129/128	1.867	60	[1.150]		130/128	1.499
511	gi|363738452	PREDICTED: guanylate-binding protein 4-like [Gallus gallus]	1254	77049	48	38	18	15	27.8	5.63	1.84	Quantitation summary for protein	129/126	0.556	43	[1.153]		130/126	0.64	43	[1.244]		131/126	0.781	43	[1.150]		129/127	0.723	44	[1.075]		130/127	0.815	44	[1.112]		131/127	1.024	44	[1.063]		129/128	0.335	44	1.184	*	130/128	0.377
512	gi|363733172	PREDICTED: aminoacyl tRNA synthase complex-interacting multifunctional protein 1 [Gallus gallus]	1248	44404	62	51	20	16	66.2	8.96	5.01	Quantitation summary for protein	129/126	1.05	54	[1.095]		130/126	0.907	54	[1.164]		131/126	0.889	54	[1.102]		129/127	1.197	54	1.062	*	130/127	1.015	54	1.05	*	131/127	1.024	54	1.054	*	129/128	2.091	54	1.173	*	130/128	1.77
513	gi|53130812	hypothetical protein RCJMB04_10e3 [Gallus gallus]	1247	31132	45	41	10	8	32.7	11.35	2.38	Quantitation summary for protein	129/126	0.8	42	[1.082]		130/126	0.613	42	[1.101]		131/126	0.791	42	[1.103]		129/127	1.246	42	[1.058]		130/127	0.935	42	1.049	*	131/127	1.243	42	1.073	*	129/128	0.973	42	[1.091]		130/128	0.73
514	gi|356460917	40S ribosomal protein S8 [Gallus gallus]	1243	31788	45	38	11	8	52.9	10.32	3.03	Quantitation summary for protein	129/126	1.203	38	1.131	*	130/126	1.008	38	[1.288]		131/126	0.941	38	1.149	*	129/127	1.279	37	1.099	*	130/127	1.048	38	[1.119]		131/127	1.008	38	[1.076]		129/128	0.812	38	[1.202]		130/128	0.667
515	gi|53135290	hypothetical protein RCJMB04_24m10 [Gallus gallus]	1239	48868	67	53	22	16	49.9	5.29	5.23	Quantitation summary for protein	129/126	1.39	57	1.069	*	130/126	1.457	57	1.136	*	131/126	1.326	57	1.076	*	129/127	1.272	57	1.047	*	130/127	1.308	57	1.054	*	131/127	1.225	57	1.039	*	129/128	1.336	57	[1.129]		130/128	1.373
516	gi|288871991	LIM and SH3 protein 1 [Gallus gallus]	1237	34848	51	43	12	11	35.7	7.04	3.69	Quantitation summary for protein	129/126	0.693	49	[1.120]		130/126	0.622	49	[1.270]		131/126	0.699	49	[1.136]		129/127	1.061	49	1.1	*	130/127	0.935	49	[1.075]		131/127	1.082	49	[1.084]		129/128	1.154	49	[1.293]		130/128	1.015
517	gi|53136692	hypothetical protein RCJMB04_32i2 [Gallus gallus]	1232	19413	46	40	10	8	45	10.07	10	Quantitation summary for protein	129/126	0.834	40	1.077	*	130/126	0.585	41	1.16	*	131/126	0.823	40	1.087	*	129/127	1.388	41	1.084	*	130/127	0.969	41	[1.070]		131/127	1.381	41	1.083	*	129/128	1.505	40	[1.226]		130/128	1.067
518	gi|53127216	hypothetical protein RCJMB04_1j22 [Gallus gallus]	1230	67383	60	51	24	22	47	8.09	2.62	Quantitation summary for protein	129/126	0.904	55	1.131	*	130/126	1.246	55	1.3	*	131/126	0.778	54	1.152	*	129/127	0.751	55	1.113	*	130/127	1.015	55	[1.103]		131/127	0.652	54	1.117	*	129/128	0.955	55	1.256		130/128	1.291
519	gi|62983	ribosomal protein L5 [Gallus gallus]	1228	42777	89	54	22	18	44.8	9.73	8.34	Quantitation summary for protein	129/126	1.063	67	[1.189]		130/126	0.857	67	[1.399]		131/126	1.014	67	[1.241]		129/127	1.188	67	[1.099]		130/127	0.939	67	[1.136]		131/127	1.145	67	[1.087]		129/128	1.552	67	[1.247]		130/128	1.225
520	gi|53127883	hypothetical protein RCJMB04_4e20 [Gallus gallus]	1228	112373	63	50	26	20	33.3	5.15	1.17	Quantitation summary for protein	129/126	1.287	53	1.098	*	130/126	1.393	53	[1.146]		131/126	1.266	53	[1.109]		129/127	1.047	53	[1.085]		130/127	1.111	53	[1.060]		131/127	1.04	53	[1.051]		129/128	0.876	53	[1.131]		130/128	0.928
521	gi|53127460	hypothetical protein RCJMB04_2i9 [Gallus gallus]	1226	73544	35	32	15	14	32.9	9.14	1.5	Quantitation summary for protein	129/126	0.739	35	1.087	*	130/126	1.029	35	1.12		131/126	0.908	35	[1.095]		129/127	0.525	35	1.09	*	130/127	0.716	35	1.048	*	131/127	0.651	35	1.057	*	129/128	0.632	35	[1.111]		130/128	0.862
522	gi|118100450	PREDICTED: RNA-binding protein 39 [Gallus gallus]	1225	66808	36	34	11	11	22.6	10.18	0.87	Quantitation summary for protein	129/126	0.827	34	[1.121]		130/126	0.708	34	[1.181]		131/126	0.955	34	[1.145]		129/127	1.018	34	1.055		130/127	0.855	34	[1.043]		131/127	1.188	34	1.035	*	129/128	0.977	34	1.069	*	130/128	0.819
523	gi|269784816	dolichyl-diphosphooligosaccharide--protein glycosyltransferase 48 kDa subunit [Gallus gallus]	1222	53375	49	46	17	15	34.1	5.37	2.52	Quantitation summary for protein	129/126	1.426	47	1.159	*	130/126	1.355	47	[1.297]		131/126	1.429	47	1.204	*	129/127	1.174	47	[1.124]		130/127	1.094	47	1.083	*	131/127	1.188	47	[1.098]		129/128	1.027	47	[1.201]		130/128	0.956
524	gi|53127520	hypothetical protein RCJMB04_2m6 [Gallus gallus]	1219	23600	47	37	8	7	40.9	6.84	8.49	Quantitation summary for protein	129/126	1.394	35	1.103	*	130/126	1.821	35	1.167	*	131/126	1.591	35	1.11	*	129/127	1.006	36	1.044		130/127	1.296	36	1.067	*	131/127	1.165	36	1.04	*	129/128	0.281	36	[1.197]		130/128	0.362
525	gi|60098985	hypothetical protein RCJMB04_18a15 [Gallus gallus]	1219	73641	48	46	14	13	31.6	8.18	0.84	Quantitation summary for protein	129/126	0.905	47	1.034	*	130/126	0.861	46	1.034	*	131/126	0.838	47	1.034	*	129/127	0.974	47	1.032	*	130/127	0.951	47	1.033	*	131/127	0.911	47	[1.033]		129/128	0.886	47	1.057	*	130/128	0.864
526	gi|53130736	hypothetical protein RCJMB04_9m8 [Gallus gallus]	1217	46322	49	43	16	13	51.8	5.82	2.7	Quantitation summary for protein	129/126	0.922	45	[1.082]		130/126	0.964	45	[1.135]		131/126	0.742	45	[1.090]		129/127	0.783	46	[1.059]		130/127	0.803	46	1.058	*	131/127	0.636	45	1.078	*	129/128	0.885	46	[1.111]		130/128	0.906
527	gi|363737348	PREDICTED: prothymosin alpha-like [Gallus gallus]	1214	10158	55	52	5	5	21.8	3.54	23.88	Quantitation summary for protein	129/126	1.625	53	[1.118]		130/126	1.793	53	[1.187]		131/126	1.542	53	[1.135]		129/127	1.019	53	[1.114]		130/127	1.103	53	[1.119]		131/127	0.976	53	[1.135]		129/128	1.47	53	[1.179]		130/128	1.589
528	gi|996020	BRM protein [Gallus gallus]	1214	207181	46	44	13	11	10.2	6.71	0.26	Quantitation summary for protein	129/126	0.913	45	[1.055]		130/126	0.995	45	1.064		131/126	1.114	45	1.046	*	129/127	0.75	45	[1.055]		130/127	0.801	45	[1.052]		131/127	0.924	45	1.051	*	129/128	0.687	45	[1.084]		130/128	0.734
529	gi|196049779	Chain E, Chicken Cytochrome Bc1 Complex Inhibited By An Iodinated Analogue Of The Polyketide Crocacin-d	1212	24501	36	32	9	8	48.5	6.07	3.08	Quantitation summary for protein	129/126	1.042	2	1.021		130/126	1.158	2	1.214		131/126	1.124	2	1.242		129/127	1.057	2	1.165		130/127	1.151	2	1.064		131/127	1.151	2	1.417		129/128	0.722	2	1.233		130/128	0.786
530	gi|53136380	hypothetical protein RCJMB04_28a17 [Gallus gallus]	1210	60188	40	36	13	10	37.5	6.02	1.47	Quantitation summary for protein	129/126	0.744	38	[1.149]		130/126	0.695	38	1.344	*	131/126	0.714	38	[1.204]		129/127	1.072	39	[1.180]		130/127	0.983	39	[1.080]		131/127	1.04	39	[1.132]		129/128	1.347	39	[1.245]		130/128	1.281
531	gi|6601335	LIS1 [Gallus gallus]	1207	55225	55	47	15	12	34.9	6.97	1.52	Quantitation summary for protein	129/126	1.376	49	[1.089]		130/126	1.517	49	[1.113]		131/126	1.229	49	[1.091]		129/127	0.921	49	1.031	*	130/127	0.995	49	1.04		131/127	0.83	49	1.033	*	129/128	1.302	49	1.098	*	130/128	1.406
532	gi|313661460	exportin-1 [Gallus gallus]	1207	138655	46	40	20	18	22.1	5.74	0.67	Quantitation summary for protein	129/126	0.945	41	1.078	*	130/126	1.164	42	1.109	*	131/126	1.181	41	1.079	*	129/127	0.703	41	[1.055]		130/127	0.85	41	1.061	*	131/127	0.888	41	1.056	*	129/128	0.197	41	1.086	*	130/128	0.238
533	gi|53133424	hypothetical protein RCJMB04_16g22 [Gallus gallus]	1206	55363	37	35	10	10	25.7	8.98	1.52	Quantitation summary for protein	129/126	1.196	35	[1.119]		130/126	1.129	35	[1.142]		131/126	1.093	35	[1.167]		129/127	0.998	35	[1.087]		130/127	0.924	35	[1.096]		131/127	0.921	35	[1.157]		129/128	1.002	35	[1.101]		130/128	0.927
534	gi|53130844	hypothetical protein RCJMB04_10g10 [Gallus gallus]	1203	33308	64	61	17	16	56.7	4.81	7.89	Quantitation summary for protein	129/126	0.945	33	1.125	*	130/126	1.277	33	[1.339]		131/126	0.922	33	[1.154]		129/127	0.835	33	[1.090]		130/127	1.106	33	[1.113]		131/127	0.822	33	1.069	*	129/128	0.618	33	[1.278]		130/128	0.818
535	gi|60099133	hypothetical protein RCJMB04_28g11 [Gallus gallus]	1203	68590	41	35	14	13	34.5	5.27	1.11	Quantitation summary for protein	129/126	0.975	38	1.089		130/126	1.071	38	[1.111]		131/126	1.006	38	1.104		129/127	0.957	38	1.039	*	130/127	1.029	37	1.027	*	131/127	0.998	38	[1.042]		129/128	0.752	38	[1.107]		130/128	0.81
536	gi|310772225	bridging integrator 1 [Gallus gallus]	1201	57780	61	51	20	16	48.6	4.98	2.57	Quantitation summary for protein	129/126	0.976	50	[1.197]		130/126	1.15	50	[1.320]		131/126	0.938	50	[1.207]		129/127	1.072	50	1.091	*	130/127	1.239	50	1.102	*	131/127	1.04	50	1.09	*	129/128	1.166	48	1.122	*	130/128	1.338
537	gi|53136660	hypothetical protein RCJMB04_32c1 [Gallus gallus]	1199	94098	47	41	16	14	28.1	9.5	0.92	Quantitation summary for protein	129/126	1.088	40	[1.062]		130/126	1.015	40	[1.091]		131/126	1.025	40	[1.067]		129/127	1.319	41	1.041	*	130/127	1.207	41	1.04	*	131/127	1.256	41	1.042	*	129/128	1.045	41	1.084	*	130/128	0.955
538	gi|363732474	PREDICTED: cell division cycle 5-like protein [Gallus gallus]	1197	109882	57	35	24	15	38.4	7.64	0.85	Quantitation summary for protein	129/126	0.836	36	1.096	*	130/126	0.816	37	1.176	*	131/126	0.875	37	1.123	*	129/127	1.076	37	[1.059]		130/127	1.004	37	[1.085]		131/127	1.094	36	1.055	*	129/128	0.929	37	1.132	*	130/128	0.867
539	gi|63898	Zyxin [Gallus gallus]	1195	67889	56	51	14	13	35.6	6.78	1.34	Quantitation summary for protein	129/126	0.974	50	[1.239]		130/126	0.938	50	[1.282]		131/126	0.771	50	[1.270]		129/127	1.399	49	1.093	*	130/127	1.316	50	[1.117]		131/127	1.115	50	[1.100]		129/128	0.859	50	[1.240]		130/128	0.81
540	gi|12958564	programmed cell death 4 protein [Gallus gallus]	1195	60497	46	44	14	14	33.4	5.34	2.04	Quantitation summary for protein	129/126	1.079	45	1.088	*	130/126	1.341	45	1.154	*	131/126	0.949	45	1.083	*	129/127	0.751	45	1.077	*	130/127	0.915	45	[1.074]		131/127	0.667	45	1.077	*	129/128	0.583	45	1.211	*	130/128	0.71
541	gi|50757498	PREDICTED: 60S ribosomal protein L12 [Gallus gallus]	1194	21564	43	38	11	9	61.2	9.48	9.15	Quantitation summary for protein	129/126	1.189	38	1.168	*	130/126	0.986	38	[1.263]		131/126	1.157	38	1.183	*	129/127	1.27	38	[1.126]		130/127	1.033	38	[1.124]		131/127	1.247	38	1.101	*	129/128	1.244	38	1.253	*	130/128	1.011
542	gi|363740921	PREDICTED: THO complex subunit 4 [Gallus gallus]	1192	29429	57	49	8	8	37.6	11.15	3.99	Quantitation summary for protein	129/126	0.848	50	[1.247]		130/126	0.704	50	[1.352]		131/126	0.861	50	[1.254]		129/127	1.161	50	1.101	*	130/127	0.945	50	1.112	*	131/127	1.191	50	1.11	*	129/128	2.032	50	[1.274]		130/128	1.652
543	gi|1841311	neuropilin precursor [Gallus gallus]	1191	115872	49	41	15	15	20.2	5.28	0.61	Quantitation summary for protein	129/126	0.883	45	1.055	*	130/126	0.937	45	[1.076]		131/126	0.866	45	1.053	*	129/127	0.907	45	[1.070]		130/127	0.944	45	[1.065]		131/127	0.898	45	[1.055]		129/128	0.713	45	1.07	*	130/128	0.741
544	gi|53126533	hypothetical protein RCJMB04_1e12 [Gallus gallus]	1189	120754	45	33	24	17	25.1	4.96	0.71	Quantitation summary for protein	129/126	1.097	35	1.105	*	130/126	1.401	35	[1.164]		131/126	1.312	35	1.101	*	129/127	0.855	37	1.059	*	130/127	1.074	37	1.082	*	131/127	1.035	36	1.066	*	129/128	0.289	37	1.17	*	130/128	0.363
545	gi|50736203	PREDICTED: endoplasmic reticulum resident protein 44 [Gallus gallus]	1189	52101	49	40	13	10	38.2	5.37	1.22	Quantitation summary for protein	129/126	0.952	43	[1.112]		130/126	0.904	43	[1.171]		131/126	0.961	42	[1.116]		129/127	1.056	41	1.05	*	130/127	0.984	41	1.048	*	131/127	1.075	41	1.042	*	129/128	0.965	42	[1.081]		130/128	0.898
546	gi|53136476	hypothetical protein RCJMB04_29j22 [Gallus gallus]	1189	115977	52	41	28	20	31.2	8.71	1.43	Quantitation summary for protein	129/126	1.084	48	1.08	*	130/126	1.477	48	[1.143]		131/126	1.035	48	1.079	*	129/127	0.86	48	[1.043]		130/127	1.149	48	[1.070]		131/127	0.829	48	1.033	*	129/128	0.542	48	1.084	*	130/128	0.599
547	gi|211780	fibrinogen beta chain, partial [Gallus gallus]	1188	62209	46	40	15	13	42.5	7.18	1.53	Quantitation summary for protein	129/126	1.055	40	1.153	*	130/126	1.207	40	[1.342]		131/126	0.967	40	1.171		129/127	1.23	40	[1.113]		130/127	1.38	40	[1.139]		131/127	1.139	40	1.088	*	129/128	0.978	40	1.235		130/128	1.096
548	gi|63781	ribosomal protein S17 (AA 7-135) [Gallus gallus]	1187	18093	52	38	11	8	63.6	9.64	50.1	Quantitation summary for protein	129/126	1.022	43	[1.077]		130/126	0.726	43	[1.126]		131/126	0.948	43	[1.082]		129/127	1.357	43	1.074	*	130/127	0.945	43	1.068	*	131/127	1.271	43	1.054	*	129/128	1.575	43	1.208	*	130/128	1.096
549	gi|15341204	cgABP260 [Gallus gallus]	1185	302708	45	37	20	18	9	5.93	0.25	Quantitation summary for protein	129/126	0.739	31	1.064	*	130/126	0.824	31	1.09	*	131/126	0.966	31	1.054	*	129/127	0.642	31	1.091	*	130/127	0.703	31	1.062	*	131/127	0.849	31	[1.058]		129/128	0.608	31	1.14	*	130/128	0.664
550	gi|363740157	PREDICTED: translational activator GCN1 [Gallus gallus]	1184	344739	41	36	19	17	8.6	7.38	0.21	Quantitation summary for protein	129/126	0.969	38	1.065	*	130/126	1.162	38	1.077	*	131/126	1.322	37	[1.077]		129/127	0.864	39	1.045	*	130/127	1.015	38	1.026	*	131/127	1.191	38	1.031	*	129/128	0.329	38	1.078	*	130/128	0.387
551	gi|53127989	hypothetical protein RCJMB04_4h13 [Gallus gallus]	1183	24477	46	41	13	12	71.2	5.65	15.62	Quantitation summary for protein	129/126	0.896	20	1.175	*	130/126	0.611	20	1.216	*	131/126	0.906	20	1.212	*	129/127	0.957	22	1.074	*	130/127	0.64	21	[1.073]		131/127	0.978	22	1.11		129/128	0.377	22	1.315	*	130/128	0.251
552	gi|53136696	hypothetical protein RCJMB04_32j5 [Gallus gallus]	1181	37357	39	29	9	7	30.4	4.73	2.28	Quantitation summary for protein	129/126	1.178	35	[1.115]		130/126	1.276	35	1.202	*	131/126	1.099	35	1.125	*	129/127	1.008	34	1.087		130/127	1.091	34	1.068	*	131/127	0.956	34	1.084	*	129/128	1.42	35	[1.189]		130/128	1.507
553	gi|88908538	RecName: Full=26S proteasome non-ATPase regulatory subunit 13; AltName: Full=26S proteasome regulatory subunit RPN9; AltName: Full=26S proteasome regulatory subunit S11; AltName: Full=26S proteasome regulatory subunit p40.5	1181	48280	50	42	15	13	36.2	5.37	2.28	Quantitation summary for protein	129/126	1.183	47	1.06	*	130/126	1.394	47	1.078	*	131/126	1.387	47	1.058	*	129/127	0.892	47	[1.054]		130/127	1.031	47	1.031	*	131/127	1.058	46	1.033	*	129/128	0.445	47	[1.097]		130/128	0.514
554	gi|86207	Ca2+-transporting ATPase (EC 3.6.3.8) SERCA2b - chicken	1180	130051	56	41	19	15	19	5.23	0.91	Quantitation summary for protein	129/126	1.137	25	[1.178]		130/126	1.022	25	1.215		131/126	1.345	25	[1.104]		129/127	1.193	26	[1.072]		130/127	1.052	26	1.065	*	131/127	1.425	26	[1.127]		129/128	0.458	26	1.173	*	130/128	0.404
555	gi|118084001	PREDICTED: peroxiredoxin-4 isoform 2 [Gallus gallus]	1179	33510	63	47	15	12	59.2	6.25	4.47	Quantitation summary for protein	129/126	1.56	52	1.113	*	130/126	1.566	52	1.194	*	131/126	1.763	52	1.144	*	129/127	1.483	52	[1.083]		130/127	1.46	52	[1.078]		131/127	1.693	52	1.079	*	129/128	1.314	52	[1.164]		130/128	1.292
556	gi|63426	lysozyme [Gallus gallus]	1179	27003	56	43	11	9	50.2	9.57	6.26	Quantitation summary for protein	129/126	1.862	47	[1.187]		130/126	1.611	47	[1.273]		131/126	1.144	47	[1.203]		129/127	2.425	47	1.131	*	130/127	2.057	47	[1.122]		131/127	1.505	47	[1.090]		129/128	2.094	47	[1.190]		130/128	1.775
557	gi|363738896	PREDICTED: transcriptional activator protein Pur-alpha, partial [Gallus gallus]	1179	34648	36	34	9	8	40.7	6.96	2	Quantitation summary for protein	129/126	0.942	35	[1.406]		130/126	0.994	35	[1.665]		131/126	0.855	35	[1.470]		129/127	1.126	35	1.123	*	130/127	1.165	35	[1.190]		131/127	1.032	35	1.113		129/128	1.574	35	1.322	*	130/128	1.626
558	gi|60098383	hypothetical protein RCJMB04_1e1 [Gallus gallus]	1179	84122	55	43	25	18	41.3	6.02	1.5	Quantitation summary for protein	129/126	1.386	45	1.121	*	130/126	1.622	45	1.172	*	131/126	1.324	45	1.117	*	129/127	0.876	45	1.045	*	130/127	1.006	45	[1.063]		131/127	0.845	45	1.047	*	129/128	0.604	45	[1.183]		130/128	0.693
559	gi|517091	transrationally controlled tumor protein [Gallus gallus]	1176	23126	35	31	8	6	42.4	4.9	4.82	Quantitation summary for protein	129/126	1.552	32	[1.103]		130/126	1.349	32	[1.163]		131/126	1.647	32	1.105	*	129/127	1.252	32	1.047	*	130/127	1.068	32	[1.064]		131/127	1.342	32	[1.044]		129/128	1.557	32	[1.151]		130/128	1.326
560	gi|57240089	vimentin, partial [Gallus gallus]	1174	20443	47	35	13	12	59	8.49	14.52	Quantitation summary for protein	129/126	0.302	9	1.031	*	130/126	0.507	9	1.026	*	131/126	0.207	9	1.046	*	129/127	0.681	9	1.043	*	130/127	1.12	9	1.041	*	131/127	0.472	9	[1.047]		129/128	1.126	9	[1.052]		130/128	1.85
561	gi|323444468	MHC class II antigen beta chain [Gallus gallus]	1167	31099	57	40	11	10	48.3	6.45	5.23	Quantitation summary for protein	129/126	2.438	9	1.326	*	130/126	1.35	9	1.385	*	131/126	2.005	9	1.473	*	129/127	1.208	10	1.216	*	130/127	0.669	10	[1.378]		131/127	1.081	10	1.468		129/128	4.27	8	1.273	*	130/128	2.407
562	gi|53133724	hypothetical protein RCJMB04_19l6 [Gallus gallus]	1167	38917	43	32	10	8	44.4	5.04	2.4	Quantitation summary for protein	129/126	0.883	41	[1.066]		130/126	0.772	41	[1.106]		131/126	0.818	41	[1.078]		129/127	1.28	41	1.078	*	130/127	1.098	41	1.061	*	131/127	1.198	41	1.054	*	129/128	1.378	41	[1.170]		130/128	1.18
563	gi|53131290	hypothetical protein RCJMB04_11i10 [Gallus gallus]	1166	121124	54	50	25	23	27.3	8.98	1	Quantitation summary for protein	129/126	0.743	48	1.064	*	130/126	0.793	48	[1.098]		131/126	0.897	48	1.074	*	129/127	0.761	48	1.074	*	130/127	0.796	48	1.043	*	131/127	0.927	48	1.046	*	129/128	0.737	48	1.066	*	130/128	0.77
564	gi|53127482	hypothetical protein RCJMB04_2j8 [Gallus gallus]	1160	67050	45	40	14	13	30.3	6.41	1.37	Quantitation summary for protein	129/126	1.144	39	1.067	*	130/126	1.009	39	[1.142]		131/126	1.029	39	1.067	*	129/127	1.027	40	1.06	*	130/127	0.891	40	1.058	*	131/127	0.931	39	1.049	*	129/128	0.574	40	1.153	*	130/128	0.497
565	gi|50728360	PREDICTED: nucleosome assembly protein 1-like 1 [Gallus gallus]	1158	53866	42	34	11	10	37.2	4.34	1.91	Quantitation summary for protein	129/126	0.896	32	1.087	*	130/126	1.042	32	1.106	*	131/126	0.921	32	1.08	*	129/127	1.009	31	1.063		130/127	1.093	22	1.017	*	131/127	1.048	31	[1.039]		129/128	0.752	33	[1.085]		130/128	0.857
566	gi|197304525	MHC class II beta chain 2 [Gallus gallus]	1156	30677	54	37	11	11	44.5	7.7	4.76	Quantitation summary for protein	129/126	---	0	---		130/126	---	0	---		131/126	---	0	---		129/127	---	0	---		130/127	---	0	---		131/127	---	0	---		129/128	---	0	---		130/128	---
567	gi|212528	p38c-crk [Gallus gallus]	1156	36878	38	33	14	13	52.5	5.36	3.32	Quantitation summary for protein	129/126	0.727	34	[1.122]		130/126	0.67	34	[1.193]		131/126	0.712	34	[1.136]		129/127	1.001	34	[1.071]		130/127	0.905	34	1.054	*	131/127	0.989	34	[1.047]		129/128	1.191	34	1.133	*	130/128	1.076
568	gi|269784808	erythroid protein 4.1 [Gallus gallus]	1153	115483	59	46	24	16	32.5	5.68	0.9	Quantitation summary for protein	129/126	0.885	47	1.105	*	130/126	0.974	47	1.171		131/126	0.848	47	1.122	*	129/127	1.098	47	1.063	*	130/127	1.186	47	1.046	*	131/127	1.063	47	[1.045]		129/128	0.859	47	[1.127]		130/128	0.927
569	gi|118100253	PREDICTED: pre-mRNA-processing-splicing factor 8 [Gallus gallus]	1153	310118	57	43	33	27	16.8	8.94	0.4	Quantitation summary for protein	129/126	1.042	51	1.07	*	130/126	0.907	51	[1.111]		131/126	1.068	51	1.074	*	129/127	0.932	51	[1.049]		130/127	0.796	51	1.06	*	131/127	0.965	51	[1.044]		129/128	0.442	51	[1.083]		130/128	0.378
570	gi|363747386	PREDICTED: citrate synthase, mitochondrial-like [Gallus gallus]	1147	46829	51	45	10	10	22.8	6.5	1.42	Quantitation summary for protein	129/126	1.594	5	[1.272]		130/126	2.386	5	[1.411]		131/126	1.412	5	[1.328]		129/127	0.86	5	1.127	*	130/127	1.391	4	1.02	*	131/127	0.769	5	1.109	*	129/128	0.219	5	1.461	*	130/128	0.265
571	gi|5870119	small nuclear ribonucleoprotein B~ [Gallus gallus]	1146	27263	41	39	8	7	27.1	11.2	2.16	Quantitation summary for protein	129/126	0.99	40	[1.082]		130/126	0.792	40	[1.156]		131/126	1.05	40	[1.085]		129/127	1.093	40	[1.063]		130/127	0.856	40	1.041	*	131/127	1.17	40	[1.056]		129/128	2.636	40	1.243	*	130/128	2.064
572	gi|53130808	hypothetical protein RCJMB04_10d20 [Gallus gallus]	1145	93697	42	38	17	16	28.9	8.56	0.92	Quantitation summary for protein	129/126	0.863	39	1.081	*	130/126	0.806	41	1.13	*	131/126	0.923	41	[1.120]		129/127	1.037	41	1.05	*	130/127	0.957	40	1.037	*	131/127	1.079	40	1.054	*	129/128	0.899	41	1.097	*	130/128	0.83
573	gi|303227902	acetyl-CoA acetyltransferase, cytosolic [Gallus gallus]	1145	45613	39	32	13	10	42.4	7.63	2.77	Quantitation summary for protein	129/126	0.706	36	[1.114]		130/126	0.648	36	[1.165]		131/126	0.651	36	[1.121]		129/127	1.012	36	1.062		130/127	0.912	36	1.052	*	131/127	0.943	36	1.056	*	129/128	1.235	37	[1.122]		130/128	1.111
574	gi|126659	RecName: Full=Protein MRP-126	1144	16691	36	35	5	5	42	6.44	5.37	Quantitation summary for protein	129/126	3.305	36	[1.130]		130/126	2.449	36	1.121	*	131/126	1.505	35	1.067	*	129/127	3.327	36	[1.130]		130/127	2.418	36	[1.087]		131/127	1.523	36	1.065	*	129/128	1.829	36	[1.209]		130/128	1.328
575	gi|53133746	hypothetical protein RCJMB04_19o18 [Gallus gallus]	1143	80554	48	43	13	11	21.2	6.68	0.68	Quantitation summary for protein	129/126	1.199	39	1.061	*	130/126	1.245	39	[1.165]		131/126	1.093	39	1.07	*	129/127	1.023	39	[1.054]		130/127	1.042	39	[1.138]		131/127	0.843	38	1.029	*	129/128	0.627	39	1.086	*	130/128	0.638
576	gi|1850772	aminopeptidase H [Gallus gallus]	1139	60960	56	51	16	15	27.9	5.64	2.35	Quantitation summary for protein	129/126	1.1	51	1.081	*	130/126	1.203	52	1.118	*	131/126	1.006	51	1.085		129/127	1.065	52	[1.055]		130/127	1.148	52	[1.078]		131/127	0.988	51	[1.038]		129/128	1.137	52	1.165	*	130/128	1.225
577	gi|60098621	hypothetical protein RCJMB04_4b12 [Gallus gallus]	1136	18643	43	35	10	9	66	7.79	11.09	Quantitation summary for protein	129/126	0.82	12	1.055	*	130/126	0.781	11	1.06	*	131/126	0.806	12	1.051	*	129/127	1.085	12	1.072	*	130/127	1.006	12	1.063		131/127	1.077	12	1.035	*	129/128	1.765	12	1.128	*	130/128	1.635
578	gi|148356974	MHC class II beta chain 2 [Gallus gallus]	1135	30902	53	36	11	11	43.3	6.45	4.69	Quantitation summary for protein	129/126	---	0	---		130/126	---	0	---		131/126	---	0	---		129/127	---	0	---		130/127	---	0	---		131/127	---	0	---		129/128	---	0	---		130/128	---
579	gi|53127806	hypothetical protein RCJMB04_3h11 [Gallus gallus]	1133	89174	49	40	22	16	36.6	6.71	1.13	Quantitation summary for protein	129/126	1.227	45	1.073	*	130/126	1.225	45	1.097	*	131/126	1.231	45	1.082	*	129/127	0.967	45	[1.040]		130/127	0.947	45	[1.051]		131/127	0.98	45	[1.052]		129/128	0.372	45	1.096	*	130/128	0.368
580	gi|118103033	PREDICTED: synaptic vesicle membrane protein VAT-1 homolog [Gallus gallus]	1131	48410	36	33	12	11	34.6	6.18	2.07	Quantitation summary for protein	129/126	0.821	35	1.071	*	130/126	0.876	35	1.104	*	131/126	0.842	35	1.072	*	129/127	0.931	35	[1.058]		130/127	0.974	35	[1.065]		131/127	0.964	35	[1.041]		129/128	1.36	35	1.091	*	130/128	1.42
581	gi|284448546	copine I [Gallus gallus]	1131	68961	50	42	13	10	24.2	5.47	0.75	Quantitation summary for protein	129/126	1.031	42	[1.069]		130/126	1.12	42	[1.104]		131/126	1.037	42	1.068	*	129/127	0.879	42	[1.037]		130/127	0.936	42	1.023	*	131/127	0.893	42	1.034	*	129/128	0.735	42	[1.061]		130/128	0.76
582	gi|212195	Ig light chain precursor [Gallus gallus]	1130	26501	81	74	5	5	17	5.89	1.9	Quantitation summary for protein	129/126	1.16	7	1.07	*	130/126	0.776	7	1.068	*	131/126	1.404	8	1.105	*	129/127	1.544	8	1.088	*	130/127	0.986	8	1.087		131/127	2.18	8	1.1	*	129/128	2.645	8	1.153	*	130/128	1.687
583	gi|363740385	PREDICTED: FK506-binding protein 15 [Gallus gallus]	1128	156910	42	37	20	18	20.7	4.88	0.57	Quantitation summary for protein	129/126	0.956	36	1.082	*	130/126	0.991	36	1.137		131/126	1.098	36	1.107	*	129/127	1.03	37	1.055	*	130/127	1.047	37	1.055	*	131/127	1.193	36	1.047	*	129/128	0.789	37	[1.119]		130/128	0.802
584	gi|53128160	hypothetical protein RCJMB04_4j8 [Gallus gallus]	1126	55395	45	40	12	11	24.9	10.14	1.38	Quantitation summary for protein	129/126	1.25	37	[1.127]		130/126	1.37	37	[1.219]		131/126	1.339	37	[1.138]		129/127	0.954	37	[1.055]		130/127	1.026	37	[1.072]		131/127	1.032	37	[1.046]		129/128	0.866	37	[1.148]		130/128	0.93
585	gi|63359	cytochrome C [Gallus gallus]	1125	16171	43	38	11	9	67.6	9.52	24.23	Quantitation summary for protein	129/126	1.477	36	1.143	*	130/126	1.596	36	[1.268]		131/126	1.297	36	1.152	*	129/127	1.078	36	1.076	*	130/127	1.141	36	[1.089]		131/127	0.956	36	[1.079]		129/128	2.29	36	1.215	*	130/128	2.423
586	gi|118093509	PREDICTED: isocitrate dehydrogenase [NADP] cytoplasmic [Gallus gallus]	1123	55451	66	55	24	21	48.7	8.02	4.32	Quantitation summary for protein	129/126	1.479	56	1.095	*	130/126	1.349	55	[1.184]		131/126	1.204	56	[1.108]		129/127	1.163	56	[1.079]		130/127	1.04	55	[1.051]		131/127	0.957	56	[1.053]		129/128	1.21	55	[1.151]		130/128	1.081
587	gi|53136145	hypothetical protein RCJMB04_27c17 [Gallus gallus]	1118	83851	41	37	19	16	33.3	8.93	0.92	Quantitation summary for protein	129/126	0.853	36	1.06	*	130/126	1.036	36	[1.093]		131/126	0.956	36	1.068	*	129/127	0.786	36	1.026	*	130/127	0.935	36	[1.044]		131/127	0.889	36	[1.034]		129/128	0.404	36	[1.077]		130/128	0.48
588	gi|363728304	PREDICTED: alpha-2-macroglobulin [Gallus gallus]	1115	189101	47	41	25	20	19.3	6.09	0.48	Quantitation summary for protein	129/126	0.992	43	1.053		130/126	1.258	43	[1.094]		131/126	1.032	43	1.054	*	129/127	0.573	43	1.045	*	130/127	0.712	43	1.039	*	131/127	0.601	43	[1.050]		129/128	0.684	43	1.11	*	130/128	0.85
589	gi|293631995	DJ-1 [Gallus gallus]	1115	23813	45	38	15	14	70.9	6.32	11.09	Quantitation summary for protein	129/126	1.217	40	[1.192]		130/126	1.319	40	[1.303]		131/126	1.084	40	[1.225]		129/127	0.828	40	[1.131]		130/127	0.88	40	1.086	*	131/127	0.745	40	[1.185]		129/128	1.377	40	[1.265]		130/128	1.462
590	gi|118092623	PREDICTED: inorganic pyrophosphatase [Gallus gallus]	1113	39317	60	52	14	13	49.7	5.53	3.29	Quantitation summary for protein	129/126	1.184	52	1.086	*	130/126	1.351	52	1.211	*	131/126	1.293	52	1.11	*	129/127	1.001	54	1.081		130/127	1.129	54	1.08	*	131/127	1.103	54	1.066	*	129/128	0.973	54	[1.245]		130/128	1.097
591	gi|53130688	hypothetical protein RCJMB04_9h20 [Gallus gallus]	1111	26248	43	37	12	11	63.4	4.69	8.76	Quantitation summary for protein	129/126	1.096	37	1.171	*	130/126	1.183	37	1.274	*	131/126	1.139	37	1.205	*	129/127	1.137	40	1.136	*	130/127	1.203	39	1.086	*	131/127	1.196	40	1.142	*	129/128	1.645	38	1.378	*	130/128	1.742
592	gi|118091993	PREDICTED: echinoderm microtubule associated protein like 1 isoform 2 [Gallus gallus]	1109	102120	46	36	19	17	21.7	6.74	0.88	Quantitation summary for protein	129/126	0.988	42	1.052		130/126	1.155	42	1.086	*	131/126	0.986	42	[1.056]		129/127	0.749	42	1.04	*	130/127	0.858	42	1.035	*	131/127	0.754	42	1.041	*	129/128	0.69	42	[1.058]		130/128	0.789
593	gi|53127712	hypothetical protein RCJMB04_3a24 [Gallus gallus]	1108	48290	56	40	16	13	38.6	6.19	2.28	Quantitation summary for protein	129/126	1.836	39	1.51	*	130/126	2.843	39	[2.463]		131/126	2.115	39	1.573	*	129/127	0.523	39	[1.376]		130/127	0.794	39	[1.390]		131/127	0.608	39	[1.303]		129/128	0.754	38	1.549	*	130/128	1.143
594	gi|53136838	hypothetical protein RCJMB04_34n7 [Gallus gallus]	1107	31098	49	43	11	9	49.8	4.73	3.15	Quantitation summary for protein	129/126	0.892	43	1.041	*	130/126	0.831	43	[1.063]		131/126	0.826	43	1.057	*	129/127	1.239	43	1.045	*	130/127	1.132	43	1.047	*	131/127	1.159	43	1.036	*	129/128	1.374	43	[1.127]		130/128	1.254
595	gi|60099067	hypothetical protein RCJMB04_22h1 [Gallus gallus]	1107	98844	51	44	22	19	31.8	6.36	1.33	Quantitation summary for protein	129/126	0.987	47	[1.092]		130/126	0.922	48	[1.149]		131/126	0.856	48	[1.093]		129/127	1.07	47	[1.068]		130/127	0.979	47	1.062	*	131/127	0.937	47	[1.056]		129/128	0.709	47	1.163	*	130/128	0.649
596	gi|363736886	PREDICTED: calponin-3 [Gallus gallus]	1107	42531	48	40	15	12	55.3	6.2	3.47	Quantitation summary for protein	129/126	0.911	41	[1.096]		130/126	1.025	41	[1.117]		131/126	0.866	41	[1.110]		129/127	1.142	41	1.07	*	130/127	1.261	41	[1.065]		131/127	1.097	41	1.051	*	129/128	0.771	41	[1.093]		130/128	0.85
597	gi|363737066	PREDICTED: insulin-like growth factor 2 mRNA-binding protein 2-like [Gallus gallus]	1107	71159	41	39	13	12	24.8	8.64	0.88	Quantitation summary for protein	129/126	1.066	27	1.089	*	130/126	1.097	26	1.08	*	131/126	1.081	27	1.068	*	129/127	1.139	26	1.049	*	130/127	1.129	27	1.045	*	131/127	1.158	27	1.045	*	129/128	1.307	26	1.12	*	130/128	1.302
598	gi|53133917	hypothetical protein RCJMB04_21p3 [Gallus gallus]	1104	72765	74	55	31	22	57.7	6.24	3.1	Quantitation summary for protein	129/126	1.064	62	[1.069]		130/126	1.15	62	[1.123]		131/126	1.075	62	[1.079]		129/127	1.002	62	1.045		130/127	1.062	62	1.045	*	131/127	1.022	61	1.034	*	129/128	1.189	60	[1.101]		130/128	1.258
599	gi|363744546	PREDICTED: guanine deaminase [Gallus gallus]	1103	56549	41	39	13	13	31.1	5.46	1.47	Quantitation summary for protein	129/126	1	39	[1.090]		130/126	0.982	39	[1.181]		131/126	0.958	39	[1.109]		129/127	1.058	39	[1.062]		130/127	1.019	39	[1.048]		131/127	1.024	39	[1.045]		129/128	0.885	39	1.133	*	130/128	0.851
600	gi|995778	cThy28kD [Gallus gallus]	1099	35396	65	51	16	13	56.2	8.32	7.57	Quantitation summary for protein	129/126	0.682	59	[1.160]		130/126	0.894	59	[1.362]		131/126	0.716	58	[1.205]		129/127	0.734	59	[1.120]		130/127	0.943	59	[1.083]		131/127	0.774	58	[1.089]		129/128	0.95	59	[1.217]		130/128	1.221
601	gi|53130450	hypothetical protein RCJMB04_7p6 [Gallus gallus]	1098	43217	47	40	12	11	39.9	6.12	2.77	Quantitation summary for protein	129/126	0.973	13	1.053		130/126	1.064	13	1.094	*	131/126	1.01	13	1.07		129/127	0.876	13	1.055	*	130/127	0.939	13	1.067	*	131/127	0.918	13	1.064	*	129/128	0.846	13	[1.197]		130/128	0.906
602	gi|60098409	hypothetical protein RCJMB04_1m16 [Gallus gallus]	1098	133882	36	33	17	17	20.3	7.85	0.66	Quantitation summary for protein	129/126	0.861	35	1.083	*	130/126	1.063	35	1.14	*	131/126	1.04	35	1.096	*	129/127	0.756	36	1.049	*	130/127	0.916	36	[1.082]		131/127	0.92	36	1.044	*	129/128	0.39	36	[1.110]		130/128	0.472
603	gi|363738588	PREDICTED: aminoacylase-1-like isoform 1 [Gallus gallus]	1097	51550	53	48	15	13	37	5.98	1.7	Quantitation summary for protein	129/126	1.038	47	1.05	*	130/126	0.996	48	[1.100]		131/126	0.942	48	[1.059]		129/127	0.892	47	1.038	*	130/127	0.884	48	[1.041]		131/127	0.861	48	1.037	*	129/128	1.065	48	[1.093]		130/128	1.039
604	gi|53127656	hypothetical protein RCJMB04_2n23 [Gallus gallus]	1097	43327	48	39	17	13	43.9	6.46	2.76	Quantitation summary for protein	129/126	0.869	39	[1.091]		130/126	0.816	39	[1.169]		131/126	0.743	39	[1.098]		129/127	1.293	39	1.079	*	130/127	1.195	37	1.053	*	131/127	1.116	39	1.065	*	129/128	1.191	39	[1.142]		130/128	1.095
605	gi|2780941	Chain A, Chicken Citrate Synthase Complex With Trifluoroacetonyl-Coa And Citrate	1096	53691	48	43	8	8	16.9	7.36	1.04	Quantitation summary for protein	129/126	0.985	3	1.135		130/126	1.125	3	1.164		131/126	1.064	3	1.118		129/127	0.878	3	1.018	*	130/127	0.984	3	1.009		131/127	0.958	3	1.038		129/128	0.581	3	1.11	*	130/128	0.65
606	gi|118096826	PREDICTED: LOW QUALITY PROTEIN: nuclear pore membrane glycoprotein 210 [Gallus gallus]	1095	227381	53	42	21	19	15.4	6.22	0.35	Quantitation summary for protein	129/126	0.973	49	[1.052]		130/126	1.032	49	[1.075]		131/126	0.826	49	[1.058]		129/127	0.724	49	1.034	*	130/127	0.753	49	1.035	*	131/127	0.621	49	[1.033]		129/128	1.257	49	[1.058]		130/128	1.306
607	gi|363742061	PREDICTED: eukaryotic translation initiation factor 4 gamma 3 [Gallus gallus]	1092	202738	58	45	33	27	24.1	5.13	0.64	Quantitation summary for protein	129/126	1.048	36	1.073	*	130/126	1.125	36	1.109	*	131/126	1.181	36	1.089	*	129/127	1.006	36	[1.081]		130/127	1.06	36	[1.075]		131/127	1.146	36	[1.098]		129/128	0.528	35	1.106	*	130/128	0.573
608	gi|363737883	PREDICTED: dnaJ homolog subfamily A member 4 [Gallus gallus]	1088	59413	30	27	7	5	19.4	7.9	0.62	Quantitation summary for protein	129/126	1.373	29	1.087	*	130/126	1.348	29	[1.111]		131/126	1.308	29	[1.078]		129/127	1.216	29	1.036	*	130/127	1.171	29	1.043	*	131/127	1.171	29	1.041	*	129/128	1.421	29	1.062	*	130/128	1.367
609	gi|228008358	heat shock 105kDa [Gallus gallus]	1087	114983	47	39	23	16	29.1	5.02	0.8	Quantitation summary for protein	129/126	1.031	32	[1.104]		130/126	1.016	32	[1.132]		131/126	1.049	32	[1.102]		129/127	1.185	32	1.061	*	130/127	1.145	32	1.068	*	131/127	1.217	32	1.054	*	129/128	0.784	32	1.071	*	130/128	0.781
610	gi|10178878	eukaryote initiation factor 2 beta [Gallus gallus]	1087	49525	49	40	18	16	47.3	5.6	2.63	Quantitation summary for protein	129/126	1.33	41	1.135	*	130/126	1.585	41	1.205	*	131/126	1.227	41	1.114	*	129/127	1.003	42	1.058		130/127	1.173	42	[1.063]		131/127	0.934	42	[1.067]		129/128	0.757	42	1.162	*	130/128	0.885
611	gi|118097622	PREDICTED: leucyl-tRNA synthetase, cytoplasmic [Gallus gallus]	1087	159735	37	35	20	20	20.4	6.51	0.56	Quantitation summary for protein	129/126	1.2	37	1.088	*	130/126	1.197	37	[1.125]		131/126	1.197	37	1.088	*	129/127	0.949	37	1.059	*	130/127	0.928	37	1.05	*	131/127	0.956	37	1.049	*	129/128	0.54	37	1.119	*	130/128	0.528
612	gi|363742348	PREDICTED: trans-2-enoyl-CoA reductase, mitochondrial [Gallus gallus]	1086	40291	32	31	13	13	56.8	7.08	2.53	Quantitation summary for protein	129/126	1.163	32	1.139	*	130/126	1.233	30	1.175	*	131/126	1.158	32	1.172	*	129/127	0.932	30	[1.081]		130/127	0.958	29	1.056	*	131/127	0.938	30	[1.074]		129/128	0.931	30	[1.113]		130/128	0.959
613	gi|363743669	PREDICTED: scaffold attachment factor B1 [Gallus gallus]	1085	125186	42	37	20	17	21.5	5.45	0.67	Quantitation summary for protein	129/126	0.764	10	1.076	*	130/126	0.771	11	1.231	*	131/126	0.785	11	1.08	*	129/127	1.024	11	1.056		130/127	1.042	12	1.108		131/127	1.094	11	1.051	*	129/128	1.148	12	1.308		130/128	1.148
614	gi|347361001	vesicle-fusing ATPase [Gallus gallus]	1084	96158	40	34	18	17	27.7	6.38	1.23	Quantitation summary for protein	129/126	1.166	37	1.052	*	130/126	0.949	37	1.067	*	131/126	1.151	37	1.055	*	129/127	1.081	36	1.038	*	130/127	0.83	37	[1.046]		131/127	1.036	37	[1.047]		129/128	0.759	37	[1.051]		130/128	0.605
615	gi|212060	Ig light chain [Gallus gallus]	1083	27067	87	73	5	5	22.9	5.58	2.19	Quantitation summary for protein	129/126	1.015	3	1.093		130/126	0.626	3	1.153	*	131/126	1.634	3	1.052	*	129/127	1.877	3	1.262	*	130/127	1.136	3	1.009	*	131/127	3.052	3	1.216	*	129/128	3.054	3	1.367	*	130/128	1.846
616	gi|363743665	PREDICTED: scaffold attachment factor B1 [Gallus gallus]	1083	120524	46	41	20	17	21	5.48	0.71	Quantitation summary for protein	129/126	0.978	16	1.067		130/126	1.137	16	1.108	*	131/126	1.041	16	1.058	*	129/127	1.085	16	1.045	*	130/127	1.237	16	1.063	*	131/127	1.167	16	1.037	*	129/128	1.151	16	1.124	*	130/128	1.311
617	gi|53129915	hypothetical protein RCJMB04_6e4 [Gallus gallus]	1080	37997	47	42	16	14	47.7	9.73	4.79	Quantitation summary for protein	129/126	1.318	21	1.093	*	130/126	1.558	20	1.14	*	131/126	1.602	20	1.091	*	129/127	0.842	22	1.075	*	130/127	0.972	22	1.058	*	131/127	1.03	22	1.062	*	129/128	0.313	23	1.22	*	130/128	0.36
618	gi|555455	Ig light chain, partial [Gallus gallus]	1079	20797	81	68	5	4	23.1	5.02	2.32	Quantitation summary for protein	129/126	---	0	---		130/126	---	0	---		131/126	---	0	---		129/127	---	0	---		130/127	---	0	---		131/127	---	0	---		129/128	---	0	---		130/128	---
619	gi|363741621	PREDICTED: exportin-2 [Gallus gallus]	1077	124628	52	43	20	17	21.5	5.41	0.64	Quantitation summary for protein	129/126	0.723	42	[1.196]		130/126	1.143	43	[1.257]		131/126	0.98	42	[1.206]		129/127	0.498	42	[1.095]		130/127	0.772	42	1.1	*	131/127	0.682	42	[1.094]		129/128	0.369	42	1.27	*	130/128	0.57
620	gi|53126936	hypothetical protein RCJMB04_1h23 [Gallus gallus]	1077	58637	40	36	13	11	32.8	9.57	1.15	Quantitation summary for protein	129/126	1.094	39	1.086	*	130/126	1.12	39	1.125	*	131/126	1.067	39	1.085	*	129/127	1.024	39	1.05	*	130/127	1.029	39	1.035	*	131/127	1.009	39	[1.036]		129/128	0.771	39	[1.125]		130/128	0.774
621	gi|1531769	rab5C-like protein [Gallus gallus]	1073	26975	36	30	8	7	56	8.64	3.55	Quantitation summary for protein	129/126	1.003	16	1.122		130/126	1.061	16	[1.156]		131/126	1.007	16	1.104		129/127	1.001	16	1.084		130/127	1.038	16	1.096		131/127	1.014	16	1.041		129/128	0.335	16	[1.241]		130/128	0.347
622	gi|50806228	PREDICTED: erlin-2 [Gallus gallus]	1072	45239	31	28	10	10	33	5.52	1.5	Quantitation summary for protein	129/126	1.055	18	1.082	*	130/126	1.187	18	1.121	*	131/126	0.999	18	1.094		129/127	1.13	18	1.048	*	130/127	1.247	18	1.065	*	131/127	1.083	17	1.058	*	129/128	0.648	18	[1.070]		130/128	0.715
623	gi|156628081	MHC class II beta [Gallus gallus]	1072	31148	55	38	11	11	48.3	6.13	5.19	Quantitation summary for protein	129/126	2.391	8	1.47	*	130/126	2.381	8	1.509	*	131/126	3.385	8	1.583	*	129/127	1.867	8	1.094	*	130/127	1.833	9	1.11	*	131/127	2.708	9	1.189	*	129/128	1.656	8	[1.378]		130/128	1.616
624	gi|60099061	hypothetical protein RCJMB04_21o24 [Gallus gallus]	1071	41258	39	37	9	8	32.9	6.42	1.52	Quantitation summary for protein	129/126	1.153	12	[1.132]		130/126	1.302	12	1.156	*	131/126	1.151	12	[1.147]		129/127	0.985	12	1.035		130/127	1.09	12	1.039	*	131/127	0.992	12	1.05		129/128	0.954	12	1.191		130/128	1.055
625	gi|363746042	PREDICTED: dynamin-2-like, partial [Gallus gallus]	1070	72793	56	39	23	19	38.8	9.04	1.64	Quantitation summary for protein	129/126	0.95	30	1.09	*	130/126	1.061	30	1.187		131/126	0.971	30	1.103		129/127	0.834	30	1.068	*	130/127	0.913	30	1.053	*	131/127	0.861	30	[1.066]		129/128	0.73	30	1.1	*	130/128	0.798
626	gi|389566436	interleukin enhancer binding factor 3-like protein [Gallus gallus]	1067	111170	57	48	23	21	24.7	8.9	1.53	Quantitation summary for protein	129/126	1.174	44	1.087	*	130/126	1.155	44	1.141	*	131/126	1.095	44	1.096	*	129/127	0.922	44	1.064	*	130/127	0.889	44	1.054	*	131/127	0.868	44	1.048	*	129/128	0.715	44	1.198	*	130/128	0.689
627	gi|47420845	FUS/TLS [Gallus gallus]	1067	56223	66	47	11	9	18.1	9.47	1.78	Quantitation summary for protein	129/126	0.732	42	[1.136]		130/126	0.623	42	1.21	*	131/126	0.738	42	[1.145]		129/127	0.956	42	1.054	*	130/127	0.798	42	1.072	*	131/127	0.973	41	1.039	*	129/128	2.341	42	[1.287]		130/128	1.953
628	gi|666873	Gi2 protein alpha-subunit [Gallus gallus]	1065	47309	44	34	15	12	47	5.43	2.85	Quantitation summary for protein	129/126	1.03	30	1.06	*	130/126	1.153	31	1.079	*	131/126	1.044	31	1.058	*	129/127	0.805	32	1.075	*	130/127	0.885	31	1.049	*	131/127	0.825	32	1.057	*	129/128	0.31	31	1.166	*	130/128	0.341
629	gi|363744228	PREDICTED: AP-3 complex subunit beta-1 [Gallus gallus]	1064	143575	46	44	22	21	22.8	5.94	0.72	Quantitation summary for protein	129/126	1.052	45	1.066	*	130/126	1.276	46	1.103	*	131/126	1.253	46	1.074	*	129/127	0.878	45	1.028	*	130/127	1.041	46	[1.039]		131/127	1.053	46	1.027	*	129/128	0.449	46	[1.120]		130/128	0.531
630	gi|118099923	PREDICTED: acyl-CoA synthetase family member 2, mitochondrial [Gallus gallus]	1060	74297	47	38	17	16	34.7	8.36	1.37	Quantitation summary for protein	129/126	1.163	39	[1.168]		130/126	1.074	39	1.246	*	131/126	1.005	39	1.144		129/127	1.181	38	[1.164]		130/127	1.068	38	[1.132]		131/127	1.03	38	[1.138]		129/128	0.673	39	[1.271]		130/128	0.608
631	gi|363735725	PREDICTED: leucine-rich repeat flightless-interacting protein 2 [Gallus gallus]	1057	87597	27	27	8	8	14.2	6.1	0.39	Quantitation summary for protein	129/126	0.917	16	1.038	*	130/126	0.842	16	1.053	*	131/126	0.86	16	[1.101]		129/127	1.526	16	1.082	*	130/127	1.373	16	1.071	*	131/127	1.446	16	[1.121]		129/128	1.356	16	1.15	*	130/128	1.224
632	gi|363728836	PREDICTED: ribosomal protein S6 kinase alpha-3 [Gallus gallus]	1057	92778	52	46	20	18	27.6	6.79	1.15	Quantitation summary for protein	129/126	1.054	25	1.111	*	130/126	1.14	26	1.199	*	131/126	0.995	26	1.124		129/127	1.109	24	1.068	*	130/127	1.166	26	1.131	*	131/127	1.049	26	1.073	*	129/128	0.602	25	[1.198]		130/128	0.638
633	gi|3220000	RecName: Full=Poly [ADP-ribose] polymerase 1; Short=PARP-1; AltName: Full=ADP-ribosyltransferase diphtheria toxin-like 1; Short=ARTD1; AltName: Full=NAD(+) ADP-ribosyltransferase 1; Short=ADPRT 1; AltName: Full=Poly[ADP-ribose] synthase 1	1056	143465	39	34	16	14	17.2	8.91	0.47	Quantitation summary for protein	129/126	0.973	35	1.061	*	130/126	1.099	35	1.081	*	131/126	1.091	35	1.062	*	129/127	0.676	35	1.059	*	130/127	0.749	35	[1.053]		131/127	0.766	35	1.055	*	129/128	0.649	35	[1.086]		130/128	0.717
634	gi|53127516	hypothetical protein RCJMB04_2m2 [Gallus gallus]	1055	61973	38	29	11	8	22.4	6.19	0.96	Quantitation summary for protein	129/126	1.223	32	1.089	*	130/126	1.691	32	1.136	*	131/126	1.249	32	1.085	*	129/127	0.807	32	1.043	*	130/127	1.093	32	[1.090]		131/127	0.832	32	[1.052]		129/128	0.935	32	1.097	*	130/128	1.266
635	gi|60098793	hypothetical protein RCJMB04_9m19 [Gallus gallus]	1055	53521	53	46	15	15	46.8	11.56	1.93	Quantitation summary for protein	129/126	0.687	49	[1.111]		130/126	0.59	49	[1.139]		131/126	0.561	48	[1.127]		129/127	1.284	48	1.051	*	130/127	1.081	48	1.049	*	131/127	1.061	48	1.045	*	129/128	1.609	48	1.073	*	130/128	1.353
636	gi|118090053	PREDICTED: hydroxyacyl-coenzyme A dehydrogenase, mitochondrial [Gallus gallus]	1055	41561	69	49	15	14	46.7	8.68	3.29	Quantitation summary for protein	129/126	1.071	55	1.071	*	130/126	0.824	55	[1.102]		131/126	0.868	55	1.079	*	129/127	1.311	55	[1.067]		130/127	0.989	55	[1.068]		131/127	1.073	55	1.052	*	129/128	1.912	55	[1.191]		130/128	1.441
637	gi|60098437	hypothetical protein RCJMB04_2e15 [Gallus gallus]	1055	117026	48	42	18	14	24.3	6.34	0.69	Quantitation summary for protein	129/126	0.898	46	1.05	*	130/126	0.929	46	1.069	*	131/126	0.882	46	1.062	*	129/127	1.08	46	[1.028]		130/127	1.096	46	1.027	*	131/127	1.071	46	[1.024]		129/128	1.146	45	[1.058]		130/128	1.163
638	gi|53129929	hypothetical protein RCJMB04_6f1 [Gallus gallus]	1054	45199	56	48	20	19	53	8.34	4.83	Quantitation summary for protein	129/126	1.088	50	1.089	*	130/126	0.915	50	[1.195]		131/126	0.894	50	1.116	*	129/127	1.134	49	1.065	*	130/127	0.985	50	[1.065]		131/127	0.992	50	[1.046]		129/128	1.594	49	[1.177]		130/128	1.314
639	gi|118092977	PREDICTED: xaa-Pro aminopeptidase 1 [Gallus gallus]	1053	79077	49	43	16	15	28.4	5.79	1	Quantitation summary for protein	129/126	1.151	46	1.085	*	130/126	1.122	46	[1.126]		131/126	1.122	46	[1.078]		129/127	0.894	46	[1.044]		130/127	0.855	46	[1.046]		131/127	0.881	46	[1.050]		129/128	0.729	45	1.093	*	130/128	0.702
640	gi|363743802	PREDICTED: thimet oligopeptidase-like [Gallus gallus]	1053	91604	55	44	29	24	39.9	5.78	1.77	Quantitation summary for protein	129/126	1.062	49	[1.138]		130/126	1.206	49	1.161	*	131/126	1.121	49	[1.142]		129/127	0.808	49	[1.059]		130/127	0.899	49	[1.067]		131/127	0.861	49	[1.060]		129/128	0.845	49	[1.168]		130/128	0.94
641	gi|363746072	PREDICTED: neuroblast differentiation-associated protein AHNAK-like [Gallus gallus]	1051	62404	45	35	21	15	45.4	8.36	1.94	Quantitation summary for protein	129/126	1.256	40	[1.096]		130/126	1.503	40	1.167	*	131/126	1.179	40	1.115	*	129/127	1.304	40	1.057	*	130/127	1.53	40	1.069	*	131/127	1.236	40	1.056	*	129/128	0.827	40	[1.168]		130/128	0.97
642	gi|363737828	PREDICTED: acidic leucine-rich nuclear phosphoprotein 32 family member A [Gallus gallus]	1050	37134	51	36	17	13	40.9	3.94	5.53	Quantitation summary for protein	129/126	0.937	43	1.108	*	130/126	0.857	43	[1.198]		131/126	0.735	43	1.125	*	129/127	1.162	43	[1.062]		130/127	1.043	43	[1.067]		131/127	0.92	43	[1.053]		129/128	1.123	42	1.189	*	130/128	1.008
643	gi|118081889	PREDICTED: coatomer subunit gamma-2-like [Gallus gallus]	1050	111182	36	34	15	14	22.4	5.48	0.64	Quantitation summary for protein	129/126	1.093	31	1.091	*	130/126	1.111	31	[1.143]		131/126	1.142	31	1.082	*	129/127	0.993	31	1.088		130/127	1.009	31	1.072		131/127	1.048	32	1.067	*	129/128	0.476	31	1.178	*	130/128	0.474
644	gi|193880585	eukaryotic translation elongation factor 2, partial [Gallus gallus]	1049	27241	47	39	16	12	78.2	9.21	10.34	Quantitation summary for protein	129/126	0.902	11	1.073	*	130/126	0.652	10	1.059	*	131/126	0.819	11	1.077	*	129/127	1.312	11	1.06	*	130/127	0.951	11	1.078		131/127	1.202	11	1.052	*	129/128	1.662	11	1.107	*	130/128	1.204
645	gi|6855513	syndesmos [Gallus gallus]	1048	36270	57	52	12	12	35.3	5.74	4.26	Quantitation summary for protein	129/126	1.133	55	1.076	*	130/126	1.16	55	[1.117]		131/126	1.02	55	1.089		129/127	1.114	55	[1.056]		130/127	1.119	55	1.034	*	131/127	1.013	55	1.044	*	129/128	0.969	55	[1.121]		130/128	0.972
646	gi|4959550	glutathione S-transferase class-alpha [Gallus gallus]	1047	26597	80	50	16	12	72	8.03	20.49	Quantitation summary for protein	129/126	0.809	17	1.31	*	130/126	1.15	17	1.574		131/126	0.851	17	1.309	*	129/127	0.985	16	1.154		130/127	1.374	16	1.155	*	131/127	1.047	16	1.127		129/128	0.74	16	1.237	*	130/128	1.607
647	gi|60099089	hypothetical protein RCJMB04_24b10 [Gallus gallus]	1046	99399	51	39	19	16	23.8	7.23	0.98	Quantitation summary for protein	129/126	0.979	40	1.072		130/126	0.995	41	1.16		131/126	0.915	41	1.096	*	129/127	0.968	41	1.059	*	130/127	0.963	41	1.049	*	131/127	0.911	41	1.047	*	129/128	0.664	41	[1.150]		130/128	0.66
648	gi|118094103	PREDICTED: 4-trimethylaminobutyraldehyde dehydrogenase [Gallus gallus]	1044	63415	71	51	24	19	47.1	7.81	3.56	Quantitation summary for protein	129/126	1.062	66	1.054	*	130/126	0.859	66	[1.102]		131/126	0.863	66	1.061	*	129/127	1.021	66	[1.039]		130/127	0.81	66	[1.042]		131/127	0.838	66	[1.031]		129/128	1.128	66	1.113	*	130/128	0.893
649	gi|2842685	RecName: Full=Myotrophin; AltName: Full=Granule cell differentiation protein; AltName: Full=Protein V-1	1043	15971	34	26	8	6	49.2	5.11	7.3	Quantitation summary for protein	129/126	0.93	32	[1.473]		130/126	0.785	30	[1.513]		131/126	0.84	31	[1.463]		129/127	1.027	32	[1.124]		130/127	0.815	30	[1.117]		131/127	0.919	31	1.136	*	129/128	1.245	29	[1.312]		130/128	0.986
650	gi|60098761	hypothetical protein RCJMB04_8b2 [Gallus gallus]	1043	92571	52	40	18	17	29.9	5.18	1	Quantitation summary for protein	129/126	0.95	41	[1.104]		130/126	1.2	41	1.185	*	131/126	0.925	41	1.146	*	129/127	1.003	41	1.072		130/127	1.243	41	1.077	*	131/127	0.987	41	1.065		129/128	0.628	41	1.15	*	130/128	0.778
651	gi|46487963	cathelicidin [Gallus gallus]	1043	18008	39	36	9	8	43.9	8.24	8.36	Quantitation summary for protein	129/126	2.189	37	1.127	*	130/126	1.979	38	[1.249]		131/126	1.11	38	[1.137]		129/127	2.452	38	1.138	*	130/127	2.352	38	1.154	*	131/127	1.358	38	1.065	*	129/128	1.312	38	1.194	*	130/128	1.257
652	gi|304423	sterol carrier protein-2, partial [Gallus gallus]	1041	69993	55	48	16	16	24.9	8.49	2.14	Quantitation summary for protein	129/126	0.829	52	1.072	*	130/126	0.874	53	[1.123]		131/126	0.847	53	[1.093]		129/127	0.954	53	[1.038]		130/127	0.994	53	[1.043]		131/127	0.991	53	1.035		129/128	1.13	53	[1.098]		130/128	1.176
653	gi|387587	Jun-binding protein, partial [Gallus gallus]	1039	29698	43	36	10	9	44.8	10.14	3.91	Quantitation summary for protein	129/126	0.861	38	1.1	*	130/126	0.709	38	1.242	*	131/126	0.756	38	1.115	*	129/127	1.103	38	[1.102]		130/127	0.89	38	[1.080]		131/127	0.978	38	[1.077]		129/128	0.721	38	[1.280]		130/128	0.582
654	gi|2358016	glutathione S-transferases CL2 [Gallus gallus]	1039	29485	63	48	18	16	75.5	6.85	21.13	Quantitation summary for protein	129/126	1.314	56	[1.099]		130/126	1.447	56	[1.140]		131/126	1.268	55	[1.095]		129/127	1.003	55	1.047		130/127	1.086	57	[1.054]		131/127	0.98	57	1.059	*	129/128	0.829	57	1.107	*	130/128	0.895
655	gi|93209536	GTP-binding protein [Gallus gallus]	1039	27027	32	30	6	6	31.7	5.42	2.6	Quantitation summary for protein	129/126	1.435	31	1.14	*	130/126	2.151	31	1.197	*	131/126	1.714	31	1.176	*	129/127	0.825	31	1.079	*	130/127	1.197	30	1.098	*	131/127	0.995	31	[1.074]		129/128	0.33	31	1.186	*	130/128	0.484
656	gi|517089	leucine zipper protein [Gallus gallus]	1038	51599	41	34	12	11	32.7	5.53	1.69	Quantitation summary for protein	129/126	0.884	37	1.17	*	130/126	1.013	37	[1.272]		131/126	0.718	37	[1.189]		129/127	0.945	37	[1.104]		130/127	1.062	37	1.086	*	131/127	0.775	37	1.066	*	129/128	1.912	37	[1.239]		130/128	2.146
657	gi|88909611	RecName: Full=Elongation factor Tu, mitochondrial; Short=EF-Tu; Flags: Precursor	1037	41032	39	33	14	13	57.1	8.98	2.45	Quantitation summary for protein	129/126	1.059	34	[1.124]		130/126	0.904	34	[1.187]		131/126	1.074	34	[1.142]		129/127	1.287	34	1.086	*	130/127	1.077	34	1.062	*	131/127	1.318	34	[1.087]		129/128	1.099	35	1.131	*	130/128	0.919
658	gi|53135689	hypothetical protein RCJMB04_25l7 [Gallus gallus]	1036	58846	37	33	9	7	23.1	6.12	0.92	Quantitation summary for protein	129/126	1.483	34	1.086	*	130/126	2.025	34	1.131	*	131/126	1.822	34	1.091	*	129/127	0.639	35	[1.064]		130/127	0.855	35	[1.044]		131/127	0.794	35	1.048	*	129/128	1.043	34	1.088	*	130/128	1.395
659	gi|50760435	PREDICTED: 60S ribosomal protein L10a [Gallus gallus]	1034	32884	45	36	13	10	43.8	9.88	4.14	Quantitation summary for protein	129/126	0.876	40	[1.107]		130/126	0.639	40	[1.223]		131/126	1.009	40	[1.132]		129/127	1.125	40	[1.077]		130/127	0.804	40	[1.078]		131/127	1.309	40	[1.067]		129/128	0.606	40	[1.150]		130/128	0.433
660	gi|60098673	hypothetical protein RCJMB04_5e8 [Gallus gallus]	1032	43969	42	36	12	10	35.2	8.48	2.19	Quantitation summary for protein	129/126	1.197	39	1.058	*	130/126	1.324	39	1.091	*	131/126	1.258	39	[1.082]		129/127	1.052	39	1.05	*	130/127	1.141	39	1.054	*	131/127	1.116	39	[1.066]		129/128	1.231	39	[1.082]		130/128	1.333
661	gi|4468189	sarcoendoplasmic reticulum calcium ATPase [Gallus gallus]	1031	128582	56	41	19	15	18.2	5.74	0.61	Quantitation summary for protein	129/126	0.848	25	1.094	*	130/126	1.504	24	1.112	*	131/126	1.336	24	1.073	*	129/127	0.605	25	1.048	*	130/127	0.838	25	[1.044]		131/127	0.791	25	1.047	*	129/128	0.208	25	[1.106]		130/128	0.288
662	gi|50760631	PREDICTED: glycylpeptide N-tetradecanoyltransferase 1 [Gallus gallus]	1030	67255	39	35	15	13	26.1	8.72	1.36	Quantitation summary for protein	129/126	1.175	27	[1.098]		130/126	0.956	27	[1.096]		131/126	1.023	27	[1.098]		129/127	1.334	27	[1.062]		130/127	1.064	27	1.039	*	131/127	1.189	26	1.037	*	129/128	1.153	27	[1.121]		130/128	0.919
663	gi|53126617	hypothetical protein RCJMB04_1f8 [Gallus gallus]	1030	60093	43	31	17	10	36.9	8.54	1.48	Quantitation summary for protein	129/126	1.005	34	[1.128]		130/126	0.923	34	1.182	*	131/126	0.956	34	[1.136]		129/127	1.127	34	1.078	*	130/127	1.015	34	1.06		131/127	1.083	34	1.065	*	129/128	1.171	34	1.187	*	130/128	1.054
664	gi|23495605	gamma adducin [Gallus gallus]	1029	91015	40	36	12	12	22	5.88	0.76	Quantitation summary for protein	129/126	0.709	5	1.024	*	130/126	0.737	6	1.043	*	131/126	0.669	6	1.079	*	129/127	1.208	6	1.047	*	130/127	1.192	6	1.037	*	131/127	1.114	6	1.033	*	129/128	1.243	5	1.026	*	130/128	1.174
665	gi|118083807	PREDICTED: intersectin-1 [Gallus gallus]	1028	228629	70	44	29	22	19.2	7.88	0.47	Quantitation summary for protein	129/126	0.905	50	1.067	*	130/126	0.855	49	1.093	*	131/126	0.883	50	1.07	*	129/127	1.156	50	1.053	*	130/127	1.027	50	[1.050]		131/127	1.139	50	1.049	*	129/128	1.196	50	[1.076]		130/128	1.061
666	gi|53130802	hypothetical protein RCJMB04_10d1 [Gallus gallus]	1027	62477	46	39	15	13	32.6	6.15	1.52	Quantitation summary for protein	129/126	1.467	42	[1.230]		130/126	1.067	42	[1.344]		131/126	1.19	42	[1.257]		129/127	1.362	42	1.078	*	130/127	0.971	42	[1.117]		131/127	1.115	42	1.062	*	129/128	1.332	42	[1.192]		130/128	0.949
667	gi|53130274	hypothetical protein RCJMB04_6l6 [Gallus gallus]	1027	34796	37	22	17	10	63.6	5.04	3.3	Quantitation summary for protein	129/126	1.375	26	[1.164]		130/126	2.035	26	[1.313]		131/126	1.347	26	[1.206]		129/127	0.885	26	1.117	*	130/127	1.285	26	1.086	*	131/127	0.876	26	1.08	*	129/128	0.86	26	1.18	*	130/128	1.246
668	gi|60098597	hypothetical protein RCJMB04_3o20 [Gallus gallus]	1026	19404	39	32	9	8	57.9	6.74	10	Quantitation summary for protein	129/126	1.226	36	[1.120]		130/126	1.529	36	1.179	*	131/126	1.211	36	[1.137]		129/127	0.821	35	1.054	*	130/127	1.008	36	[1.056]		131/127	0.822	36	[1.056]		129/128	1.022	36	1.078		130/128	1.249
669	gi|12082723	B cell phosphoinositide 3-kinase adaptor [Gallus gallus]	1025	101382	35	33	11	11	16.9	4.99	0.66	Quantitation summary for protein	129/126	0.796	35	1.059	*	130/126	0.866	35	[1.110]		131/126	0.827	35	[1.061]		129/127	0.824	35	[1.079]		130/127	0.88	35	1.07	*	131/127	0.865	35	[1.064]		129/128	0.586	35	1.102	*	130/128	0.625
670	gi|363733438	PREDICTED: ubiquitin-like modifier activating enzyme 6 [Gallus gallus]	1024	142103	30	29	8	8	9.5	6.05	0.26	Quantitation summary for protein	129/126	1.275	28	1.119	*	130/126	1.349	28	[1.121]		131/126	1.18	28	1.129	*	129/127	0.894	28	[1.063]		130/127	0.928	28	1.059	*	131/127	0.837	27	1.053	*	129/128	0.584	28	[1.172]		130/128	0.605
671	gi|50749392	PREDICTED: protein transport protein Sec24C [Gallus gallus]	1017	135933	35	34	15	14	15.7	6.39	0.5	Quantitation summary for protein	129/126	1.134	34	[1.195]		130/126	1.116	34	1.273	*	131/126	1.07	34	1.185	*	129/127	0.987	34	1.074		130/127	0.952	34	1.083	*	131/127	0.941	34	1.081	*	129/128	0.604	34	[1.188]		130/128	0.583
672	gi|3136063	20S proteasome subunit C2 [Gallus gallus]	1016	32400	54	39	17	14	53.8	6.08	7.55	Quantitation summary for protein	129/126	0.973	42	[1.110]		130/126	0.981	43	[1.212]		131/126	0.886	42	[1.122]		129/127	0.987	42	[1.068]		130/127	0.976	42	[1.064]		131/127	0.908	42	1.061	*	129/128	1.515	42	[1.148]		130/128	1.497
673	gi|118098548	PREDICTED: ataxin-2 [Gallus gallus]	1014	129753	40	34	16	14	16.6	9.32	0.53	Quantitation summary for protein	129/126	1.029	35	1.084	*	130/126	1.078	35	1.148	*	131/126	1.01	35	[1.094]		129/127	1.153	35	[1.084]		130/127	1.184	35	1.045	*	131/127	1.143	35	[1.077]		129/128	1.485	35	[1.102]		130/128	1.524
674	gi|381214362	actin-related protein 2/3 complex subunit 4 [Gallus gallus]	1014	23016	47	39	12	10	53.6	8.53	12.27	Quantitation summary for protein	129/126	0.948	43	[1.315]		130/126	1.066	43	[1.598]		131/126	0.907	42	[1.373]		129/127	0.825	45	[1.170]		130/127	0.91	45	[1.138]		131/127	0.799	44	[1.125]		129/128	1.461	44	1.208	*	130/128	1.611
675	gi|196049775	Chain A, Chicken Cytochrome Bc1 Complex Inhibited By An Iodinated Analogue Of The Polyketide Crocacin-d	1013	54793	44	38	19	16	41.3	5.95	2.82	Quantitation summary for protein	129/126	0.928	36	1.1	*	130/126	1.205	36	1.168	*	131/126	0.958	36	1.097	*	129/127	0.869	38	[1.096]		130/127	1.112	38	[1.056]		131/127	0.905	39	[1.075]		129/128	0.542	38	1.209	*	130/128	0.692
676	gi|53129746	hypothetical protein RCJMB04_6b22 [Gallus gallus]	1011	33274	38	30	11	9	38	4.93	2.78	Quantitation summary for protein	129/126	1.001	33	[1.104]		130/126	1.003	33	[1.185]		131/126	0.942	33	[1.142]		129/127	0.986	33	[1.094]		130/127	0.968	33	[1.059]		131/127	0.937	33	[1.070]		129/128	1.706	33	[1.162]		130/128	1.674
677	gi|363735970	PREDICTED: poly [ADP-ribose] polymerase 14 [Gallus gallus]	1008	237484	54	43	25	22	15.9	6.17	0.43	Quantitation summary for protein	129/126	0.929	44	1.064	*	130/126	0.97	44	1.08	*	131/126	1.074	44	1.065	*	129/127	0.687	45	1.052	*	130/127	0.704	45	1.036	*	131/127	0.802	45	1.032	*	129/128	0.341	45	1.093	*	130/128	0.349
678	gi|53136812	hypothetical protein RCJMB04_34f23 [Gallus gallus]	1008	42668	34	27	13	10	37.8	8.76	2.56	Quantitation summary for protein	129/126	0.846	30	[1.212]		130/126	0.769	30	[1.275]		131/126	0.817	30	[1.235]		129/127	0.99	31	1.066		130/127	0.887	30	1.066	*	131/127	0.967	30	1.052	*	129/128	1.31	31	[1.144]		130/128	1.168
679	gi|53128716	hypothetical protein RCJMB04_5b15 [Gallus gallus]	1007	100860	55	43	21	20	26	5.81	0.96	Quantitation summary for protein	129/126	0.977	43	[1.053]		130/126	1.014	43	[1.077]		131/126	1.252	43	[1.069]		129/127	0.674	43	1.074	*	130/127	0.686	43	1.063	*	131/127	0.872	43	1.056	*	129/128	0.435	43	1.112	*	130/128	0.442
680	gi|323690111	A-kinase anchor protein 2 [Gallus gallus]	1006	109449	45	40	21	18	26.3	5.25	0.91	Quantitation summary for protein	129/126	0.876	42	[1.069]		130/126	1.338	42	[1.109]		131/126	1.018	42	[1.095]		129/127	0.831	41	1.06	*	130/127	1.248	42	[1.058]		131/127	0.978	42	[1.053]		129/128	0.708	42	1.105	*	130/128	1.061
681	gi|54151003	TPA_inf: HN1 [Gallus gallus]	1003	18216	39	31	7	7	66	4.83	5.49	Quantitation summary for protein	129/126	1.098	32	[1.098]		130/126	1.024	32	1.115		131/126	0.907	32	1.08	*	129/127	1.607	32	1.114	*	130/127	1.47	32	1.105	*	131/127	1.342	32	[1.101]		129/128	1.111	31	[1.125]		130/128	1.018
682	gi|5163126	chromatin assembly factor 1 p48 subunit [Gallus gallus]	1002	53362	38	29	11	8	25.4	4.74	0.93	Quantitation summary for protein	129/126	1.412	27	1.139	*	130/126	2.596	27	1.254	*	131/126	1.673	27	1.149	*	129/127	0.622	27	[1.077]		130/127	1.122	27	[1.062]		131/127	0.745	27	1.056	*	129/128	0.836	27	[1.190]		130/128	1.506
683	gi|50748450	PREDICTED: protein transport protein Sec23A [Gallus gallus]	1002	93918	45	37	18	15	25.6	6.51	1.13	Quantitation summary for protein	129/126	1.188	23	1.09	*	130/126	1.032	22	1.113		131/126	0.942	23	1.079	*	129/127	1.35	22	1.048	*	130/127	1.166	22	[1.059]		131/127	1.096	23	1.047	*	129/128	1.045	23	[1.156]		130/128	0.889
684	gi|363735331	PREDICTED: STE20-like kinase isoform 2 [Gallus gallus]	1000	177150	63	46	32	24	27.4	5.01	0.7	Quantitation summary for protein	129/126	0.879	47	1.087	*	130/126	0.98	47	1.111		131/126	0.966	46	1.07	*	129/127	1.08	48	1.049	*	130/127	1.183	48	[1.061]		131/127	1.049	48	1.039	*	129/128	0.673	48	1.132	*	130/128	0.737
685	gi|53127704	hypothetical protein RCJMB04_2p22 [Gallus gallus]	999	83628	30	29	9	9	19.4	6.92	0.53	Quantitation summary for protein	129/126	1.085	28	1.074	*	130/126	1.177	28	1.106	*	131/126	1.202	28	1.08	*	129/127	0.955	29	[1.052]		130/127	1.017	29	[1.058]		131/127	1.067	29	[1.064]		129/128	0.592	29	[1.167]		130/128	0.63
686	gi|61611929	visfatin [Gallus gallus]	997	67124	38	36	12	12	27	6.66	1.36	Quantitation summary for protein	129/126	0.993	35	1.099		130/126	1.129	35	[1.207]		131/126	1.179	35	1.12	*	129/127	0.787	36	1.082	*	130/127	0.877	36	1.075	*	131/127	0.943	36	1.06	*	129/128	0.637	35	1.216	*	130/128	0.732
687	gi|50748456	PREDICTED: pinin [Gallus gallus]	996	92460	47	42	19	18	26.2	6.89	1.15	Quantitation summary for protein	129/126	0.855	44	[1.069]		130/126	0.907	44	1.166	*	131/126	1.075	44	1.085	*	129/127	1.023	44	[1.056]		130/127	1.063	44	[1.077]		131/127	1.298	44	1.049	*	129/128	1.142	44	[1.191]		130/128	1.185
688	gi|38680347	proteasome subunit beta-type [Gallus gallus]	995	29748	41	34	10	9	37.6	6.43	3.41	Quantitation summary for protein	129/126	1.01	38	[1.215]		130/126	0.975	38	[1.341]		131/126	0.954	38	[1.243]		129/127	0.969	38	1.092	*	130/127	0.918	38	[1.084]		131/127	0.925	38	1.058	*	129/128	1.49	38	[1.202]		130/128	1.409
689	gi|310750374	pyruvate dehydrogenase E1 component subunit beta, mitochondrial [Gallus gallus]	995	43433	38	38	9	9	34.8	5.95	1.6	Quantitation summary for protein	129/126	1.029	38	[1.088]		130/126	0.93	38	[1.094]		131/126	0.908	38	[1.087]		129/127	1.074	38	1.038	*	130/127	0.952	38	1.04	*	131/127	0.957	38	1.041	*	129/128	1.358	37	1.074	*	130/128	1.239
690	gi|49618768	fatty acid-binding protein [Gallus gallus]	995	18473	33	32	8	7	48.9	5.92	5.35	Quantitation summary for protein	129/126	2.209	18	1.187	*	130/126	1.522	18	[1.345]		131/126	1.09	18	[1.215]		129/127	3.535	18	1.143	*	130/127	2.388	18	1.065	*	131/127	1.76	18	1.098	*	129/128	4.727	18	[1.403]		130/128	3.19
691	gi|363730964	PREDICTED: aspartyl/asparaginyl beta-hydroxylase [Gallus gallus]	992	99491	60	45	19	14	29.7	4.78	0.68	Quantitation summary for protein	129/126	1.101	49	1.059	*	130/126	1.261	49	[1.063]		131/126	1.019	49	[1.051]		129/127	1.199	49	[1.034]		130/127	1.346	49	[1.038]		131/127	1.12	49	[1.033]		129/128	0.902	49	1.042	*	130/128	1.012
692	gi|118093933	PREDICTED: kinesin heavy chain isoform 5C [Gallus gallus]	991	132193	39	33	18	13	21	5.9	0.55	Quantitation summary for protein	129/126	1.046	18	1.059	*	130/126	1.109	18	1.073	*	131/126	1.07	18	1.068	*	129/127	0.834	18	1.051	*	130/127	0.867	18	1.056	*	131/127	0.861	18	1.052	*	129/128	0.751	18	1.104	*	130/128	0.78
693	gi|118101125	PREDICTED: aflatoxin B1 aldehyde reductase member 4 [Gallus gallus]	988	40839	39	34	12	11	39	6.76	2.47	Quantitation summary for protein	129/126	1.044	33	1.073	*	130/126	0.814	34	1.147	*	131/126	1.017	34	1.072		129/127	1.168	33	[1.152]		130/127	0.893	34	1.039	*	131/127	1.149	34	[1.105]		129/128	0.955	33	[1.103]		130/128	0.729
694	gi|26449182	Translocating chain-associated membrane protein [Gallus gallus]	987	49217	30	28	2	2	5.3	9.59	0.3	Quantitation summary for protein	129/126	0.927	27	1.052	*	130/126	0.669	28	1.079	*	131/126	0.987	28	1.06		129/127	1.359	27	1.088	*	130/127	1.046	28	1.065	*	131/127	1.589	28	1.093	*	129/128	1.123	28	1.076	*	130/128	0.826
695	gi|363729033	PREDICTED: LOW QUALITY PROTEIN: E3 SUMO-protein ligase RanBP2 [Gallus gallus]	986	398091	52	39	30	25	10.8	5.73	0.26	Quantitation summary for protein	129/126	0.918	42	[1.105]		130/126	1.077	41	1.126	*	131/126	1.339	42	[1.132]		129/127	0.71	42	1.09	*	130/127	0.801	42	1.077	*	131/127	1.045	42	[1.074]		129/128	0.642	42	[1.193]		130/128	0.724
696	gi|60098703	hypothetical protein RCJMB04_6f14 [Gallus gallus]	981	139440	53	44	21	19	21.6	7.54	0.66	Quantitation summary for protein	129/126	1.002	47	1.049		130/126	0.957	47	1.078	*	131/126	0.894	47	1.052	*	129/127	1.007	47	1.031		130/127	0.948	46	1.037	*	131/127	0.907	47	1.03	*	129/128	0.505	47	[1.142]		130/128	0.473
697	gi|363740927	PREDICTED: c-Jun-amino-terminal kinase-interacting protein 4 isoform 2 [Gallus gallus]	979	164591	38	34	19	16	17.7	5.1	0.4	Quantitation summary for protein	129/126	1.131	35	[1.098]		130/126	1.198	35	[1.145]		131/126	1.23	35	[1.105]		129/127	1.08	35	1.056	*	130/127	1.122	35	1.075	*	131/127	1.186	35	1.042	*	129/128	0.799	35	1.045	*	130/128	0.831
698	gi|118097995	PREDICTED: rho GTPase-activating protein 17 [Gallus gallus]	979	108974	32	28	14	12	24.1	6.76	0.47	Quantitation summary for protein	129/126	0.866	28	1.165	*	130/126	0.875	28	1.169	*	131/126	0.924	28	[1.151]		129/127	0.905	27	1.103	*	130/127	0.894	27	1.081	*	131/127	0.969	26	1.061	*	129/128	0.501	28	1.201	*	130/128	0.496
699	gi|148356972	MHC class II beta chain 1 [Gallus gallus]	978	31060	46	30	8	8	35.4	6.54	2.75	Quantitation summary for protein	129/126	---	0	---		130/126	---	0	---		131/126	---	0	---		129/127	---	0	---		130/127	---	0	---		131/127	---	0	---		129/128	---	0	---		130/128	---
700	gi|53133530	hypothetical protein RCJMB04_17j8 [Gallus gallus]	978	27094	36	30	10	9	56.9	8.26	5.41	Quantitation summary for protein	129/126	1.098	31	1.14	*	130/126	0.866	30	1.117	*	131/126	0.947	31	1.142	*	129/127	1.125	32	[1.091]		130/127	0.876	32	1.073	*	131/127	0.981	31	1.074		129/128	1.209	32	[1.255]		130/128	0.938
701	gi|3098615	heterochromatin-associated protein MENT [Gallus gallus]	977	56405	74	56	17	15	37.6	9.38	2.29	Quantitation summary for protein	129/126	2.009	67	1.07	*	130/126	2.001	67	[1.123]		131/126	1.281	67	[1.068]		129/127	2.267	68	[1.085]		130/127	2.215	68	1.064	*	131/127	1.46	68	1.048	*	129/128	2.516	68	1.11	*	130/128	2.455
702	gi|382545825	60S ribosomal protein L9 [Gallus gallus]	977	25832	47	37	15	11	61.5	10.08	6.88	Quantitation summary for protein	129/126	1.209	38	[1.286]		130/126	1.076	39	[1.308]		131/126	1.258	38	[1.309]		129/127	1.051	38	[1.085]		130/127	0.918	39	1.073	*	131/127	1.104	36	1.06	*	129/128	1.046	38	[1.156]		130/128	0.912
703	gi|363731481	PREDICTED: uncharacterized protein LOC421337 [Gallus gallus]	976	259112	46	40	22	19	13.4	4.65	0.27	Quantitation summary for protein	129/126	1.167	41	[1.079]		130/126	1.163	41	1.138	*	131/126	1.225	41	[1.089]		129/127	1.296	41	1.051	*	130/127	1.266	41	[1.067]		131/127	1.374	41	[1.050]		129/128	1.081	41	1.089	*	130/128	1.054
704	gi|53136620	hypothetical protein RCJMB04_31l4 [Gallus gallus]	975	41757	34	30	10	8	37.2	5.71	2.39	Quantitation summary for protein	129/126	0.642	26	1.162	*	130/126	0.616	27	[1.289]		131/126	0.756	27	1.166	*	129/127	0.761	26	1.095	*	130/127	0.715	27	[1.131]		131/127	0.904	27	1.072	*	129/128	0.556	25	1.195	*	130/128	0.537
705	gi|53127702	hypothetical protein RCJMB04_2p21 [Gallus gallus]	974	35374	30	25	6	6	25.3	4.45	1.93	Quantitation summary for protein	129/126	1.735	28	1.139	*	130/126	1.253	28	[1.348]		131/126	1.707	29	[1.177]		129/127	1.591	28	[1.117]		130/127	1.127	28	[1.088]		131/127	1.595	28	[1.079]		129/128	1.579	28	[1.243]		130/128	1.118
706	gi|145411437	calpastatin [Gallus gallus]	973	103219	52	42	18	14	35.1	5.44	0.93	Quantitation summary for protein	129/126	1.031	46	[1.073]		130/126	0.973	46	[1.114]		131/126	0.874	46	[1.075]		129/127	1.489	46	1.083	*	130/127	1.379	46	1.072	*	131/127	1.276	46	1.084	*	129/128	1.565	46	1.111	*	130/128	1.448
707	gi|53133158	hypothetical protein RCJMB04_14j19 [Gallus gallus]	972	80427	51	44	18	17	38.2	8.56	1.22	Quantitation summary for protein	129/126	1.189	44	1.052	*	130/126	1.04	45	1.077	*	131/126	1.107	45	1.065	*	129/127	1.076	45	1.036	*	130/127	0.923	46	[1.033]		131/127	1.011	46	1.025	*	129/128	0.788	46	[1.104]		130/128	0.675
708	gi|53130636	hypothetical protein RCJMB04_9b22 [Gallus gallus]	972	38581	34	27	13	10	46.6	8.57	2.16	Quantitation summary for protein	129/126	0.765	29	1.111	*	130/126	0.73	29	[1.150]		131/126	0.751	29	1.112	*	129/127	0.981	29	1.086		130/127	0.917	29	[1.109]		131/127	0.972	29	1.089		129/128	0.906	29	[1.209]		130/128	0.846
709	gi|363740147	PREDICTED: malectin-like [Gallus gallus]	971	37919	44	42	10	9	34.9	5.23	1.73	Quantitation summary for protein	129/126	1.238	42	1.058	*	130/126	1.522	42	1.107	*	131/126	1.284	42	1.07	*	129/127	0.937	42	[1.039]		130/127	1.129	42	1.033	*	131/127	0.981	42	[1.028]		129/128	0.446	42	[1.127]		130/128	0.537
710	gi|363739271	PREDICTED: uncharacterized protein LOC416349 [Gallus gallus]	970	142701	51	42	20	18	17.6	8.98	0.54	Quantitation summary for protein	129/126	0.827	41	[1.060]		130/126	0.843	41	[1.107]		131/126	0.761	41	1.068	*	129/127	1.003	42	1.051		130/127	1.003	43	[1.035]		131/127	0.933	42	1.032	*	129/128	0.905	43	1.077	*	130/128	0.904
711	gi|5805326	ubiquitin carboxyl-terminal hydrolase-6 [Gallus gallus]	968	29907	36	34	10	9	43.9	4.91	2.55	Quantitation summary for protein	129/126	0.84	34	[1.079]		130/126	0.704	34	[1.111]		131/126	0.764	34	1.08	*	129/127	1.122	34	[1.062]		130/127	0.922	34	1.052	*	131/127	1.029	34	1.049	*	129/128	1.535	34	[1.185]		130/128	1.26
712	gi|53133318	hypothetical protein RCJMB04_15g7 [Gallus gallus]	968	23343	57	46	11	11	43.3	8.91	13.64	Quantitation summary for protein	129/126	0.826	49	[1.164]		130/126	1.252	49	[1.278]		131/126	0.826	49	[1.184]		129/127	0.774	49	1.059	*	130/127	1.15	49	[1.101]		131/127	0.781	49	1.063	*	129/128	0.788	49	1.198	*	130/128	1.17
713	gi|118101519	PREDICTED: interferon-induced guanylate-binding protein 1 [Gallus gallus]	968	125133	41	37	17	14	21.6	5.57	0.59	Quantitation summary for protein	129/126	0.917	36	1.051	*	130/126	1.119	36	1.054	*	131/126	1.034	36	1.046	*	129/127	0.805	36	1.051	*	130/127	0.964	36	[1.044]		131/127	0.916	36	1.038	*	129/128	0.339	36	1.109	*	130/128	0.405
714	gi|1184955	CLE7 [Gallus gallus]	966	32299	28	26	8	8	41.4	6.01	2.94	Quantitation summary for protein	129/126	1.141	22	1.184	*	130/126	1.177	22	1.238	*	131/126	1.053	22	1.177		129/127	1.196	24	1.084	*	130/127	1.214	25	[1.113]		131/127	1.116	24	1.061	*	129/128	1.211	24	1.103	*	130/128	1.23
715	gi|53132829	hypothetical protein RCJMB04_14a13 [Gallus gallus]	966	93864	42	35	16	14	24.8	6.34	0.99	Quantitation summary for protein	129/126	1.229	20	[1.121]		130/126	1.091	20	1.218		131/126	1.149	20	1.118	*	129/127	1.068	20	1.073	*	130/127	0.93	20	1.077	*	131/127	1.008	20	1.057		129/128	0.911	20	1.239		130/128	0.793
716	gi|118093746	PREDICTED: actin-related protein 2/3 complex subunit 2 [Gallus gallus]	964	41139	56	45	18	14	47.7	6.84	5.89	Quantitation summary for protein	129/126	1.601	50	1.136	*	130/126	2.41	50	[1.219]		131/126	1.617	50	1.143	*	129/127	0.705	51	1.083	*	130/127	1.042	52	1.068	*	131/127	0.719	51	1.071	*	129/128	0.534	51	[1.237]		130/128	0.789
717	gi|1684841	calgizzarin [Gallus gallus]	961	13353	27	23	4	3	37.6	6.08	6.81	Quantitation summary for protein	129/126	1.225	25	[1.232]		130/126	0.833	24	[1.214]		131/126	0.732	24	[1.174]		129/127	1.488	25	[1.114]		130/127	0.992	24	[1.121]		131/127	0.897	24	1.087	*	129/128	2.587	25	1.18	*	130/128	1.723
718	gi|118099442	PREDICTED: erythrocyte band 7 integral membrane protein [Gallus gallus]	960	34689	28	26	9	8	35.6	6.75	2.58	Quantitation summary for protein	129/126	0.913	27	1.13	*	130/126	0.778	27	[1.256]		131/126	0.787	27	1.149	*	129/127	1.153	27	1.103	*	130/127	0.978	26	1.073		131/127	1.003	27	1.075		129/128	0.806	27	[1.120]		130/128	0.672
719	gi|53132618	hypothetical protein RCJMB04_13l2 [Gallus gallus]	960	56491	46	36	19	16	42.1	5.81	2.48	Quantitation summary for protein	129/126	1.241	38	1.087	*	130/126	1.466	38	1.161	*	131/126	1.255	38	1.096	*	129/127	0.894	39	1.048	*	130/127	1.036	39	1.06	*	131/127	0.914	39	1.043	*	129/128	0.575	39	[1.153]		130/128	0.666
720	gi|40950628	syntaxin 1-binding protein [Gallus gallus]	958	79975	43	37	16	13	32.8	6.49	0.9	Quantitation summary for protein	129/126	0.881	39	[1.143]		130/126	1.017	39	[1.158]		131/126	0.808	39	[1.128]		129/127	0.79	40	1.056	*	130/127	0.895	40	1.047	*	131/127	0.732	40	1.062	*	129/128	0.496	40	[1.195]		130/128	0.561
721	gi|53127728	hypothetical protein RCJMB04_3c8 [Gallus gallus]	958	10988	21	21	7	7	56.3	4.77	7.89	Quantitation summary for protein	129/126	0.894	8	[1.318]		130/126	0.719	8	[1.603]		131/126	0.711	8	1.32	*	129/127	1.706	8	1.162	*	130/127	1.345	8	1.21	*	131/127	1.37	8	1.126	*	129/128	1.33	8	1.327	*	130/128	1.097
722	gi|60098917	hypothetical protein RCJMB04_15e19 [Gallus gallus]	958	34790	29	27	7	6	33.1	5.85	1.99	Quantitation summary for protein	129/126	0.964	28	1.05	*	130/126	0.829	28	[1.089]		131/126	0.925	28	1.071	*	129/127	1.282	28	1.04	*	130/127	1.082	28	[1.042]		131/127	1.243	28	1.029	*	129/128	1.469	28	[1.050]		130/128	1.238
723	gi|60098679	hypothetical protein RCJMB04_5g1 [Gallus gallus]	958	56819	41	30	12	8	26.9	5.65	1.6	Quantitation summary for protein	129/126	1.079	35	1.085	*	130/126	1.155	35	1.118	*	131/126	1.292	35	1.099	*	129/127	0.801	36	1.055	*	130/127	0.841	36	1.046	*	131/127	0.969	36	1.048	*	129/128	0.561	36	[1.173]		130/128	0.588
724	gi|156628091	MHC class II beta [Gallus gallus]	957	31075	45	28	8	7	35.4	6.54	3.15	Quantitation summary for protein	129/126	---	0	---		130/126	---	0	---		131/126	---	0	---		129/127	---	0	---		130/127	---	0	---		131/127	---	0	---		129/128	---	0	---		130/128	---
725	gi|303304963	26S proteasome non-ATPase regulatory subunit 14 [Gallus gallus]	955	39528	33	27	9	6	31.3	6	1.23	Quantitation summary for protein	129/126	0.983	28	1.173		130/126	0.931	28	1.318		131/126	0.995	28	1.195		129/127	1.004	28	[1.131]		130/127	0.931	28	[1.123]		131/127	1.025	28	[1.113]		129/128	1.022	28	[1.234]		130/128	0.948
726	gi|6224674	prosaposin [Gallus gallus]	955	69458	43	39	15	13	33.4	5.03	1.19	Quantitation summary for protein	129/126	1.096	39	1.236	*	130/126	0.935	39	[1.505]		131/126	1.303	39	[1.314]		129/127	0.791	40	1.181	*	130/127	0.662	40	[1.192]		131/127	0.95	40	1.133	*	129/128	2.308	40	[1.374]		130/128	1.93
727	gi|363740578	PREDICTED: protein transport protein Sec16A [Gallus gallus]	955	286991	33	30	15	14	9.5	5.68	0.18	Quantitation summary for protein	129/126	1.009	31	1.045		130/126	0.988	31	1.056		131/126	1.075	31	1.056	*	129/127	1.347	31	[1.066]		130/127	1.293	31	1.053	*	131/127	1.45	31	1.072	*	129/128	0.692	31	[1.086]		130/128	0.664
728	gi|53128779	hypothetical protein RCJMB04_5c11 [Gallus gallus]	954	167225	40	33	21	17	20.7	5.63	0.44	Quantitation summary for protein	129/126	1.353	32	1.077	*	130/126	1.3	32	1.129	*	131/126	1.334	32	1.074	*	129/127	1.029	32	1.061	*	130/127	0.969	32	[1.073]		131/127	1.024	32	1.047	*	129/128	0.573	32	[1.157]		130/128	0.539
729	gi|363737017	PREDICTED: propionyl-CoA carboxylase beta chain, mitochondrial [Gallus gallus]	954	63364	36	34	10	9	23.8	6.8	0.83	Quantitation summary for protein	129/126	0.947	35	[1.056]		130/126	0.935	35	[1.084]		131/126	0.861	35	1.058	*	129/127	0.996	35	[1.044]		130/127	0.963	34	1.032	*	131/127	0.914	35	[1.042]		129/128	1.054	35	[1.068]		130/128	1.02
730	gi|48479076	ribosomal protein S13 [Gallus gallus]	953	21566	66	56	13	10	57.6	10.53	7.78	Quantitation summary for protein	129/126	1.301	60	[1.056]		130/126	1.064	60	[1.138]		131/126	1.347	60	[1.067]		129/127	1.098	60	[1.053]		130/127	0.88	60	[1.059]		131/127	1.148	60	1.035	*	129/128	1.459	58	[1.181]		130/128	1.182
731	gi|363737670	PREDICTED: tight junction protein ZO-1 [Gallus gallus]	952	210812	46	39	25	21	19	6.3	0.47	Quantitation summary for protein	129/126	0.926	40	1.08	*	130/126	1.167	40	1.152	*	131/126	1.128	39	1.081	*	129/127	0.923	40	[1.074]		130/127	1.141	41	1.06	*	131/127	1.138	40	1.067	*	129/128	1.498	40	1.116	*	130/128	1.847
732	gi|212702	src kinase [Gallus gallus]	951	59940	34	29	13	11	30.2	7.1	1	Quantitation summary for protein	129/126	1.099	28	1.129	*	130/126	1.182	29	[1.170]		131/126	1.127	29	[1.119]		129/127	0.71	28	1.07	*	130/127	0.749	29	1.078	*	131/127	0.735	29	1.085	*	129/128	0.485	28	1.104	*	130/128	0.511
733	gi|226437575	NADH dehydrogenase [ubiquinone] iron-sulfur protein 3, mitochondrial [Gallus gallus]	950	32536	34	30	12	10	47.5	6.55	2.9	Quantitation summary for protein	129/126	0.891	34	1.116	*	130/126	0.997	34	[1.107]		131/126	0.904	34	1.087	*	129/127	0.947	34	1.068	*	130/127	1.04	34	[1.057]		131/127	0.971	34	1.053	*	129/128	1.223	34	[1.146]		130/128	1.335
734	gi|63705	unnamed protein product [Gallus gallus]	948	41090	74	46	19	14	43.9	4.66	5.41	Quantitation summary for protein	129/126	0.547	52	[1.312]		130/126	0.578	52	[1.414]		131/126	0.525	52	[1.318]		129/127	0.887	53	[1.094]		130/127	0.929	53	[1.097]		131/127	0.864	53	[1.077]		129/128	0.858	53	1.265	*	130/128	0.897
735	gi|60098481	hypothetical protein RCJMB04_2m11 [Gallus gallus]	947	79202	35	29	14	13	25.6	5.44	0.91	Quantitation summary for protein	129/126	1.094	33	1.079	*	130/126	1.116	33	[1.109]		131/126	1.107	33	1.081	*	129/127	0.991	33	[1.062]		130/127	0.991	33	1.059		131/127	1.012	33	1.058		129/128	0.437	33	1.126	*	130/128	0.437
736	gi|118089398	PREDICTED: UDP-N-acetylglucosamine--peptide N-acetylglucosaminyltransferase 110 kDa subunit isoform 1 [Gallus gallus]	946	129072	36	36	13	13	15	6.21	0.53	Quantitation summary for protein	129/126	0.996	36	[1.076]		130/126	0.89	36	1.102	*	131/126	0.93	36	1.09	*	129/127	1.056	35	1.034	*	130/127	0.926	35	1.042	*	131/127	1	36	1.043		129/128	0.714	36	[1.071]		130/128	0.626
737	gi|1708877	RecName: Full=Lumican; AltName: Full=Keratan sulfate proteoglycan lumican; Short=KSPG lumican; Flags: Precursor	945	44288	38	35	9	8	24.8	6.07	1.74	Quantitation summary for protein	129/126	0.627	36	[1.160]		130/126	0.713	36	[1.225]		131/126	0.64	36	[1.179]		129/127	0.686	36	1.048	*	130/127	0.765	36	1.041	*	131/127	0.707	36	1.042	*	129/128	1.568	36	[1.061]		130/128	1.745
738	gi|118083300	PREDICTED: uncharacterized protein LOC418286 [Gallus gallus]	944	13019	55	43	6	4	26.1	4.17	4.14	Quantitation summary for protein	129/126	0.783	44	1.07	*	130/126	0.694	44	[1.141]		131/126	0.658	44	1.088	*	129/127	1.307	44	[1.089]		130/127	1.136	44	1.093	*	131/127	1.11	44	[1.097]		129/128	2.774	44	[1.287]		130/128	2.407
739	gi|60459251	myeloid antimicrobial peptide 27 [Gallus gallus]	943	18237	42	29	8	7	48.1	8.28	6.69	Quantitation summary for protein	129/126	2.12	36	1.181	*	130/126	1.081	36	[1.357]		131/126	0.936	36	[1.168]		129/127	3.531	35	1.298	*	130/127	1.774	35	1.204	*	131/127	1.578	35	1.185	*	129/128	2.826	34	1.293	*	130/128	1.498
740	gi|53127408	hypothetical protein RCJMB04_2d7 [Gallus gallus]	942	91770	54	36	16	12	25.4	6.64	0.88	Quantitation summary for protein	129/126	1.057	39	1.123	*	130/126	1.054	39	[1.217]		131/126	1.041	39	1.153		129/127	1.124	39	[1.107]		130/127	1.1	39	[1.108]		131/127	1.118	39	[1.096]		129/128	1.116	39	[1.152]		130/128	1.091
741	gi|3551531	avena [Gallus gallus]	940	66570	53	36	22	16	42.4	6.11	2.33	Quantitation summary for protein	129/126	1.105	43	[1.211]		130/126	1.404	42	1.266	*	131/126	1.195	41	1.171	*	129/127	0.977	41	1.095		130/127	1.189	42	1.105	*	131/127	0.942	42	[1.089]		129/128	1.258	43	1.128	*	130/128	1.55
742	gi|1922282	vitronectin [Gallus gallus]	937	56470	28	26	4	4	11.7	5.17	0.49	Quantitation summary for protein	129/126	1.11	25	[1.118]		130/126	1.403	25	[1.196]		131/126	1.111	25	[1.116]		129/127	0.888	26	1.066	*	130/127	1.101	25	1.07	*	131/127	0.898	26	1.068	*	129/128	0.83	25	[1.145]		130/128	1.028
743	gi|32261074	Raftlin [Gallus gallus]	936	77223	38	30	14	11	29.9	5.3	1.11	Quantitation summary for protein	129/126	1.02	30	1.085		130/126	0.951	31	[1.120]		131/126	1.108	31	1.075	*	129/127	1.03	31	1.066	*	130/127	0.944	31	1.046	*	131/127	1.186	32	1.055	*	129/128	0.656	31	[1.239]		130/128	0.601
744	gi|363741740	PREDICTED: glutathione synthetase [Gallus gallus]	935	56663	38	33	19	15	50.8	5.67	2.67	Quantitation summary for protein	129/126	0.973	33	[1.088]		130/126	0.964	33	[1.153]		131/126	0.886	32	[1.105]		129/127	0.959	34	1.06	*	130/127	0.931	34	1.062	*	131/127	0.882	33	1.044	*	129/128	1.25	33	[1.088]		130/128	1.214
745	gi|363732535	PREDICTED: CAD protein [Gallus gallus]	934	266749	44	34	25	17	11.2	6.1	0.29	Quantitation summary for protein	129/126	1.168	38	1.06	*	130/126	1.079	38	1.072	*	131/126	1.167	38	1.061	*	129/127	0.942	38	1.035	*	130/127	0.854	38	[1.039]		131/127	0.951	38	[1.047]		129/128	0.588	38	[1.080]		130/128	0.532
746	gi|793834	ribosomal protein S6 [Gallus gallus]	934	36829	49	41	16	14	39.8	10.83	3.32	Quantitation summary for protein	129/126	1.056	42	1.08	*	130/126	0.978	42	1.151		131/126	0.995	42	1.089		129/127	1.14	42	1.051	*	130/127	1.036	42	1.045	*	131/127	1.085	42	1.049	*	129/128	0.823	42	1.14	*	130/128	0.746
747	gi|53131920	hypothetical protein RCJMB04_12f15 [Gallus gallus]	933	66445	41	37	21	18	34.4	5.81	1.75	Quantitation summary for protein	129/126	1.197	39	1.079	*	130/126	1.54	37	1.117	*	131/126	1.171	39	[1.083]		129/127	0.914	40	[1.068]		130/127	1.032	40	[1.049]		131/127	0.903	40	1.053	*	129/128	1.176	40	1.101	*	130/128	1.327
748	gi|363738094	PREDICTED: enhancer of mRNA-decapping protein 4 [Gallus gallus]	931	170065	46	38	16	15	15.1	5.52	0.36	Quantitation summary for protein	129/126	1.066	43	1.045	*	130/126	1.267	43	1.054	*	131/126	1.178	42	1.039	*	129/127	0.881	43	[1.034]		130/127	1.027	43	1.023	*	131/127	0.972	43	[1.031]		129/128	0.625	43	[1.092]		130/128	0.727
749	gi|50801766	PREDICTED: uncharacterized protein LOC426548 [Gallus gallus]	931	53737	51	38	9	8	33	4.69	2.49	Quantitation summary for protein	129/126	1.933	21	1.137	*	130/126	1.986	21	1.21	*	131/126	1.705	21	[1.120]		129/127	1.071	31	[1.091]		130/127	1.1	36	1.099	*	131/127	0.961	32	1.081	*	129/128	0.61	36	[1.175]		130/128	0.627
750	gi|363744316	PREDICTED: histidine triad nucleotide-binding protein 2, mitochondrial-like [Gallus gallus]	931	17993	26	25	5	5	43.7	9.56	1.36	Quantitation summary for protein	129/126	1.139	26	1.047	*	130/126	0.886	25	1.049	*	131/126	0.913	26	1.057	*	129/127	1.366	26	[1.055]		130/127	1.08	26	1.04	*	131/127	1.106	26	1.05	*	129/128	1.458	26	[1.116]		130/128	1.152
751	gi|129270064	ribosomal protein S3A [Gallus gallus]	930	39013	79	49	22	14	64	9.74	7.33	Quantitation summary for protein	129/126	1.105	59	1.157	*	130/126	0.912	59	[1.336]		131/126	1.152	59	1.184	*	129/127	1.163	59	[1.130]		130/127	0.942	59	1.073	*	131/127	1.225	59	[1.101]		129/128	1.169	59	[1.320]		130/128	0.945
752	gi|299469458	nuclear mitotic apparatus protein [Gallus gallus]	928	278936	43	39	23	21	12.6	5.85	0.29	Quantitation summary for protein	129/126	0.812	37	1.045	*	130/126	0.919	37	[1.067]		131/126	1.184	36	1.045	*	129/127	0.665	37	1.057	*	130/127	0.738	37	1.042	*	131/127	0.882	37	1.051	*	129/128	0.575	37	1.082	*	130/128	0.638
753	gi|60098591	hypothetical protein RCJMB04_3o5 [Gallus gallus]	928	103505	41	34	15	10	22.1	6.19	0.65	Quantitation summary for protein	129/126	0.995	40	1.05		130/126	0.931	40	1.089	*	131/126	0.996	40	1.057		129/127	1.142	40	1.045	*	130/127	1.049	40	[1.039]		131/127	1.155	40	1.034	*	129/128	0.687	40	[1.108]		130/128	0.63
754	gi|118101790	PREDICTED: peptidyl-prolyl cis-trans isomerase E [Gallus gallus]	926	39598	37	32	13	13	49.5	5.43	2.91	Quantitation summary for protein	129/126	0.928	33	1.218	*	130/126	0.924	33	[1.473]		131/126	0.877	33	[1.225]		129/127	1.084	33	[1.148]		130/127	1.067	30	1.072	*	131/127	1.034	33	[1.127]		129/128	1.605	33	[1.311]		130/128	1.565
755	gi|2842531	gamma-subunit of enolase [Gallus gallus]	926	53579	26	22	5	4	14.7	4.84	0.52	Quantitation summary for protein	129/126	---	1	---		130/126	---	1	---		131/126	---	1	---		129/127	---	1	---		130/127	---	1	---		131/127	---	1	---		129/128	---	1	---		130/128	---
756	gi|60098817	hypothetical protein RCJMB04_11a3 [Gallus gallus]	925	72974	27	25	10	8	20.7	4.98	0.62	Quantitation summary for protein	129/126	1.15	24	1.142	*	130/126	1.43	24	[1.239]		131/126	1.164	23	1.122	*	129/127	1.209	25	1.096	*	130/127	1.514	25	1.114	*	131/127	1.211	25	1.109	*	129/128	0.633	23	[1.134]		130/128	0.814
757	gi|363740430	PREDICTED: golgin subfamily A member 2 [Gallus gallus]	925	134909	44	38	19	18	19.7	5.14	0.65	Quantitation summary for protein	129/126	1.405	39	1.072	*	130/126	1.423	39	[1.106]		131/126	1.482	39	1.077	*	129/127	1.206	39	1.044	*	130/127	1.197	39	1.041	*	131/127	1.284	39	1.037	*	129/128	1.084	39	[1.125]		130/128	1.076
758	gi|53132771	hypothetical protein RCJMB04_13p14 [Gallus gallus]	922	72877	55	39	21	15	33.8	5.79	1.41	Quantitation summary for protein	129/126	1.269	46	1.071	*	130/126	1.382	46	[1.153]		131/126	1.116	46	1.076	*	129/127	0.912	46	[1.066]		130/127	0.973	46	[1.053]		131/127	0.809	46	1.046	*	129/128	0.628	46	[1.214]		130/128	0.669
759	gi|53136198	hypothetical protein RCJMB04_27f19 [Gallus gallus]	920	50614	33	30	10	8	34.2	6.19	1.27	Quantitation summary for protein	129/126	1.207	29	1.069	*	130/126	1.321	29	1.135	*	131/126	1.194	29	1.108	*	129/127	0.935	29	[1.100]		130/127	1.004	29	1.043		131/127	0.934	29	1.064	*	129/128	0.643	24	1.079	*	130/128	0.659
760	gi|53127125	hypothetical protein RCJMB04_1j5 [Gallus gallus]	919	57508	40	30	14	12	33.7	5.11	2.22	Quantitation summary for protein	129/126	0.958	26	1.176		130/126	1.025	27	1.334		131/126	0.895	27	1.192	*	129/127	1.252	27	1.113	*	130/127	1.318	27	1.127	*	131/127	1.183	27	1.091	*	129/128	1.46	27	[1.162]		130/128	1.534
761	gi|53130296	hypothetical protein RCJMB04_6n9 [Gallus gallus]	916	50347	41	33	16	14	47.5	5.28	1.94	Quantitation summary for protein	129/126	1.037	34	1.144		130/126	1.563	34	1.193	*	131/126	0.578	33	1.169	*	129/127	0.929	33	1.04	*	130/127	1.367	33	1.057	*	131/127	0.519	33	1.078	*	129/128	0.701	33	[1.104]		130/128	1.032
762	gi|53134035	hypothetical protein RCJMB04_22f12 [Gallus gallus]	916	53801	43	37	13	11	44.8	6.06	2.28	Quantitation summary for protein	129/126	1.463	38	1.14	*	130/126	1.513	39	1.209	*	131/126	1.449	39	1.125	*	129/127	1.021	39	1.065	*	130/127	1.036	40	[1.078]		131/127	1.021	40	[1.069]		129/128	1.318	39	[1.186]		130/128	1.336
763	gi|50760377	PREDICTED: ras-related protein Rap-1A isoform 2 [Gallus gallus]	916	25455	39	33	10	9	52.7	6.4	5.37	Quantitation summary for protein	129/126	1.511	15	1.153	*	130/126	1.634	15	1.266	*	131/126	1.817	15	1.171	*	129/127	0.828	15	1.086	*	130/127	0.878	15	1.13	*	131/127	1.005	15	1.132		129/128	0.209	15	1.145	*	130/128	0.221
764	gi|633042	Catalytic subunit of chicken gizzard type-1 delta protein phosphatase [Gallus gallus]	915	42544	39	32	13	12	51.7	5.84	2.85	Quantitation summary for protein	129/126	0.991	4	1.021		130/126	1.116	4	1.292		131/126	0.979	4	1.181		129/127	0.879	4	[1.168]		130/127	0.97	4	1.138		131/127	0.877	4	1.015	*	129/128	1.01	4	1.331		130/128	1.114
765	gi|363734610	PREDICTED: alpha-parvin [Gallus gallus]	914	39368	30	26	7	7	24.3	4.92	1.43	Quantitation summary for protein	129/126	1.132	24	1.115	*	130/126	1.465	25	1.295	*	131/126	1.137	25	1.136	*	129/127	0.809	25	1.104	*	130/127	1.019	25	[1.091]		131/127	0.814	25	1.089	*	129/128	0.635	25	[1.303]		130/128	0.799
766	gi|53130460	hypothetical protein RCJMB04_7p13 [Gallus gallus]	914	63620	35	31	10	10	17.6	6.92	1.02	Quantitation summary for protein	129/126	0.778	32	1.076	*	130/126	0.727	31	1.098	*	131/126	0.698	32	1.094	*	129/127	1.128	32	1.036	*	130/127	1.039	32	1.045	*	131/127	1.022	32	1.039	*	129/128	1.944	32	1.116	*	130/128	1.788
767	gi|68159406	20-hydroxysteroid dehydrogenase [Gallus gallus]	914	35791	33	25	13	11	49.6	8.5	2.46	Quantitation summary for protein	129/126	0.881	27	1.178	*	130/126	0.891	27	1.318	*	131/126	0.792	27	1.214	*	129/127	0.869	26	1.115	*	130/127	0.862	27	1.104	*	131/127	0.789	27	1.118	*	129/128	0.929	27	1.285		130/128	0.92
768	gi|545981	calponin alpha [chickens, gizzard, Peptide, 292 aa]	913	37324	45	36	15	14	45.2	9.3	3.62	Quantitation summary for protein	129/126	0.689	27	[1.097]		130/126	1.313	27	[1.199]		131/126	0.967	27	[1.089]		129/127	0.412	27	1.076	*	130/127	0.773	26	1.045	*	131/127	0.584	27	[1.082]		129/128	0.593	27	[1.104]		130/128	1.108
769	gi|1667484	calcyclin [Gallus gallus]	913	12790	36	29	7	5	35.9	4.91	7.49	Quantitation summary for protein	129/126	1.889	28	[1.203]		130/126	3.084	28	[1.440]		131/126	1.222	28	[1.216]		129/127	1.13	28	[1.096]		130/127	1.808	29	[1.143]		131/127	0.738	29	[1.084]		129/128	1.384	28	[1.187]		130/128	2.212
770	gi|50760791	PREDICTED: interferon-induced 35 kDa protein [Gallus gallus]	908	50251	41	31	15	11	43.3	5.09	2.14	Quantitation summary for protein	129/126	0.863	35	1.088	*	130/126	0.94	35	1.146	*	131/126	0.961	35	[1.080]		129/127	0.883	34	1.069	*	130/127	0.937	34	1.046	*	131/127	0.983	33	1.057		129/128	0.686	35	1.133	*	130/128	0.731
771	gi|1142718	Cu/Zn superoxide dismutase [Gallus gallus]	908	18500	48	39	9	5	38.3	6.1	7.78	Quantitation summary for protein	129/126	1.008	44	[1.079]		130/126	0.961	44	1.169		131/126	0.904	44	1.105	*	129/127	0.981	44	1.067		130/127	0.917	44	1.071	*	131/127	0.889	44	1.055	*	129/128	1.475	44	[1.181]		130/128	1.377
772	gi|53133822	hypothetical protein RCJMB04_20k8 [Gallus gallus]	907	85518	43	36	20	18	29.7	6.54	1.2	Quantitation summary for protein	129/126	0.96	40	[1.088]		130/126	1.006	40	1.17		131/126	1.015	40	1.131		129/127	0.79	40	1.089	*	130/127	0.812	40	[1.082]		131/127	0.844	40	1.052	*	129/128	0.775	40	[1.160]		130/128	0.796
773	gi|363738961	PREDICTED: LOW QUALITY PROTEIN: vesicular integral-membrane protein VIP36-like [Gallus gallus]	905	41521	32	24	10	9	43.6	6	1.51	Quantitation summary for protein	129/126	1.076	26	1.163	*	130/126	1.284	26	1.261	*	131/126	1.265	26	1.195	*	129/127	0.965	26	1.063	*	130/127	1.129	26	[1.090]		131/127	1.146	26	1.059	*	129/128	0.468	26	1.147	*	130/128	0.548
774	gi|363746869	PREDICTED: 3-hydroxyacyl-CoA dehydrogenase type-2, partial [Gallus gallus]	904	24379	24	23	10	9	62.6	8.98	5.85	Quantitation summary for protein	129/126	0.871	16	1.105	*	130/126	0.835	16	1.132	*	131/126	0.824	16	1.11	*	129/127	0.96	16	[1.092]		130/127	0.902	16	1.055	*	131/127	0.917	16	1.078	*	129/128	1.217	16	1.203	*	130/128	1.142
775	gi|60098479	hypothetical protein RCJMB04_2l20 [Gallus gallus]	903	73227	42	36	16	14	27.8	7.46	1.11	Quantitation summary for protein	129/126	0.826	38	1.108	*	130/126	0.795	38	1.146	*	131/126	0.572	38	1.134	*	129/127	1.135	38	1.062	*	130/127	1.071	38	1.063	*	131/127	0.795	38	1.062	*	129/128	1.011	38	1.165		130/128	0.953
776	gi|62924	haem oxygenase [Gallus gallus]	903	39503	39	32	10	9	33.8	8.41	1.84	Quantitation summary for protein	129/126	0.833	35	1.064	*	130/126	0.748	35	1.086	*	131/126	1.166	35	1.068	*	129/127	0.585	35	1.056	*	130/127	0.515	35	[1.062]		131/127	0.827	35	1.039	*	129/128	0.834	35	[1.128]		130/128	0.733
777	gi|53126116	hypothetical protein RCJMB04_1a12 [Gallus gallus]	902	69227	42	33	15	11	36.9	7.03	1.1	Quantitation summary for protein	129/126	0.889	36	1.094	*	130/126	1.146	36	1.136	*	131/126	1.143	36	1.09	*	129/127	0.666	35	1.087	*	130/127	0.844	34	1.041	*	131/127	0.865	35	1.068	*	129/128	0.337	36	1.149	*	130/128	0.425
778	gi|161513307	immunoglobulin heavy chain variable region [Gallus gallus]	902	14427	28	24	5	5	40.3	5.85	5.73	Quantitation summary for protein	129/126	---	0	---		130/126	---	0	---		131/126	---	0	---		129/127	---	0	---		130/127	---	0	---		131/127	---	0	---		129/128	---	0	---		130/128	---
779	gi|313851076	synaptosomal-associated protein 23 [Gallus gallus]	900	26394	27	23	11	9	48.8	4.9	4.29	Quantitation summary for protein	129/126	1.021	24	1.097		130/126	0.953	25	1.137		131/126	1.021	24	1.086		129/127	1.048	25	[1.057]		130/127	0.977	25	1.055	*	131/127	1.058	25	1.074	*	129/128	0.375	25	1.237	*	130/128	0.349
780	gi|53130746	hypothetical protein RCJMB04_9n8 [Gallus gallus]	898	33741	35	28	15	12	49	8.79	3.93	Quantitation summary for protein	129/126	0.856	30	[1.155]		130/126	0.891	30	[1.229]		131/126	0.874	30	[1.165]		129/127	0.999	30	[1.067]		130/127	1.02	30	[1.070]		131/127	1.031	30	[1.061]		129/128	1.38	30	[1.124]		130/128	1.407
781	gi|212113	immunoglobulin light-chain VJ region, partial [Gallus gallus]	897	11384	23	18	3	3	50	8	3.85	Quantitation summary for protein	129/126	---	0	---		130/126	---	0	---		131/126	---	0	---		129/127	---	0	---		130/127	---	0	---		131/127	---	0	---		129/128	---	0	---		130/128	---
782	gi|50758981	PREDICTED: prefoldin subunit 4 [Gallus gallus]	896	18427	32	28	9	7	43.3	4.43	4.37	Quantitation summary for protein	129/126	1.006	28	[1.143]		130/126	0.83	28	[1.240]		131/126	0.904	27	[1.140]		129/127	1.114	24	1.038	*	130/127	0.906	27	[1.100]		131/127	1.015	27	1.038	*	129/128	2.15	28	1.163	*	130/128	1.737
783	gi|50729086	PREDICTED: branched-chain-amino-acid aminotransferase, cytosolic [Gallus gallus]	893	49239	36	29	13	11	33.2	5.58	2.42	Quantitation summary for protein	129/126	1.255	35	1.066	*	130/126	1.274	35	1.131	*	131/126	1.127	35	1.074	*	129/127	1.133	35	1.048	*	130/127	1.128	35	1.052	*	131/127	1.028	35	1.039	*	129/128	0.879	35	[1.196]		130/128	0.874
784	gi|60099127	hypothetical protein RCJMB04_28a6 [Gallus gallus]	892	86160	28	24	15	13	27.5	9.11	0.82	Quantitation summary for protein	129/126	1.323	27	1.073	*	130/126	1.165	27	1.122	*	131/126	1.665	27	1.091	*	129/127	1.312	27	[1.090]		130/127	1.133	27	1.059	*	131/127	1.668	27	[1.089]		129/128	0.887	26	1.075	*	130/128	0.772
785	gi|363743138	PREDICTED: aminopeptidase B [Gallus gallus]	891	73149	42	34	17	15	33.1	5.15	1.74	Quantitation summary for protein	129/126	1.015	38	1.092		130/126	1.07	38	1.176	*	131/126	0.995	38	1.101		129/127	0.903	39	[1.074]		130/127	0.935	39	[1.066]		131/127	0.895	39	1.065	*	129/128	0.482	39	[1.204]		130/128	0.498
786	gi|15420977	malic enzyme [Gallus gallus]	890	70323	41	35	15	13	29.4	6.45	1.38	Quantitation summary for protein	129/126	1.075	33	1.113	*	130/126	1.087	33	1.153	*	131/126	0.915	33	1.132	*	129/127	0.962	33	[1.085]		130/127	0.954	33	1.055	*	131/127	0.827	33	1.069	*	129/128	0.843	33	1.084	*	130/128	0.834
787	gi|50737088	PREDICTED: ubiquitin carboxyl-terminal hydrolase 14 isoform 2 [Gallus gallus]	888	65905	32	27	15	11	34.3	5.09	1.18	Quantitation summary for protein	129/126	1.067	29	1.123	*	130/126	1.178	29	[1.354]		131/126	1.105	29	1.151	*	129/127	0.879	29	[1.132]		130/127	0.951	29	[1.123]		131/127	0.919	29	[1.110]		129/128	0.812	28	[1.208]		130/128	0.882
788	gi|53127424	hypothetical protein RCJMB04_2e22 [Gallus gallus]	887	65651	30	29	12	12	29.2	6.74	1.19	Quantitation summary for protein	129/126	1.235	30	1.092	*	130/126	1.455	30	1.15	*	131/126	1.211	30	1.098	*	129/127	0.896	30	1.056	*	130/127	1.035	30	1.035	*	131/127	0.887	30	1.046	*	129/128	0.82	30	1.09	*	130/128	0.946
789	gi|53133976	hypothetical protein RCJMB04_22c23 [Gallus gallus]	884	69872	33	30	9	8	17	5.77	0.58	Quantitation summary for protein	129/126	0.673	31	[1.094]		130/126	0.575	31	[1.138]		131/126	0.604	31	[1.094]		129/127	1.395	31	1.071	*	130/127	1.168	31	1.049	*	131/127	1.264	31	1.066	*	129/128	1.338	31	[1.111]		130/128	1.119
790	gi|53127476	hypothetical protein RCJMB04_2i22 [Gallus gallus]	884	126866	27	23	9	7	10.5	8.93	0.23	Quantitation summary for protein	129/126	0.93	26	[1.055]		130/126	1.019	26	[1.057]		131/126	1.061	26	1.059	*	129/127	0.749	26	1.047	*	130/127	0.805	26	[1.036]		131/127	0.864	26	1.032	*	129/128	0.274	26	[1.105]		130/128	0.294
791	gi|53134922	hypothetical protein RCJMB04_24a4 [Gallus gallus]	884	28912	37	31	9	8	39.7	6.37	4.74	Quantitation summary for protein	129/126	0.977	35	[1.431]		130/126	1.165	35	[1.612]		131/126	1.055	35	[1.478]		129/127	0.98	35	1.108		130/127	1.145	35	[1.161]		131/127	1.068	35	1.108	*	129/128	0.853	35	1.202	*	130/128	0.992
792	gi|50756357	PREDICTED: actin-related protein 2/3 complex subunit 3 [Gallus gallus]	884	25119	45	32	8	6	51.7	8.78	4.76	Quantitation summary for protein	129/126	1.11	38	[1.159]		130/126	1.644	39	[1.232]		131/126	1.446	39	[1.184]		129/127	0.701	41	1.056	*	130/127	1.019	42	[1.077]		131/127	0.923	42	[1.092]		129/128	0.842	41	[1.280]		130/128	1.221
793	gi|323444446	MHC class II antigen beta chain [Gallus gallus]	884	30592	47	30	10	10	43.3	6.12	3.23	Quantitation summary for protein	129/126	---	0	---		130/126	---	0	---		131/126	---	0	---		129/127	---	0	---		130/127	---	0	---		131/127	---	0	---		129/128	---	0	---		130/128	---
794	gi|118453	RecName: Full=Desmin	884	58575	40	30	16	13	34.1	5.45	1.4	Quantitation summary for protein	129/126	0.704	3	1.066	*	130/126	1.318	3	1.043	*	131/126	0.643	3	1.186	*	129/127	0.181	3	1.172	*	130/127	0.333	3	1.064	*	131/127	0.167	3	[1.288]		129/128	1.315	3	1.155		130/128	2.412
795	gi|53131115	hypothetical protein RCJMB04_11d7 [Gallus gallus]	884	39527	33	30	9	8	39.1	5.27	1.06	Quantitation summary for protein	129/126	1.032	30	1.129		130/126	1.178	30	[1.165]		131/126	1.098	30	[1.142]		129/127	0.849	30	1.035	*	130/127	0.95	30	[1.061]		131/127	0.912	30	1.032	*	129/128	0.588	30	[1.093]		130/128	0.657
796	gi|240849374	serine/threonine-protein kinase PAK 1 [Gallus gallus]	883	71667	35	32	10	8	21	5.57	0.87	Quantitation summary for protein	129/126	0.918	7	1.207		130/126	0.664	7	1.148	*	131/126	0.764	7	1.191	*	129/127	1.183	7	1.187	*	130/127	0.839	7	1.291		131/127	0.994	7	1.168		129/128	1.821	7	[1.135]		130/128	1.291
797	gi|3309261	signal transducer and activator of transcription 5B [Gallus gallus]	883	100390	41	36	13	11	19.3	5.9	0.62	Quantitation summary for protein	129/126	1.06	38	1.067	*	130/126	1.182	38	[1.101]		131/126	1.138	38	1.077	*	129/127	0.848	38	1.045	*	130/127	0.927	38	1.027	*	131/127	0.919	38	[1.036]		129/128	0.512	38	1.081	*	130/128	0.559
798	gi|53136800	hypothetical protein RCJMB04_34b10 [Gallus gallus]	881	89903	44	37	24	19	37.4	6.1	1.36	Quantitation summary for protein	129/126	1.205	37	1.157	*	130/126	1.243	37	[1.303]		131/126	1.176	37	[1.191]		129/127	1.097	37	[1.096]		130/127	1.111	37	[1.070]		131/127	1.082	37	[1.069]		129/128	0.662	37	1.18	*	130/128	0.669
799	gi|363728789	PREDICTED: 60S ribosomal protein L8 [Gallus gallus]	881	34650	47	33	16	11	57.2	10.96	2.94	Quantitation summary for protein	129/126	0.828	33	1.096	*	130/126	0.745	36	1.128	*	131/126	0.741	35	1.07	*	129/127	1.178	34	[1.086]		130/127	1.037	35	1.051	*	131/127	1.061	35	[1.105]		129/128	1.1	34	[1.156]		130/128	0.967
800	gi|363746013	PREDICTED: probable ATP-dependent RNA helicase DDX23, partial [Gallus gallus]	879	54285	33	26	13	10	37.3	8.24	0.8	Quantitation summary for protein	129/126	1.104	27	1.047	*	130/126	1.187	27	1.076	*	131/126	1.121	27	1.052	*	129/127	1.019	27	1.031	*	130/127	1.074	27	1.031	*	131/127	1.045	27	1.026	*	129/128	0.991	27	[1.078]		130/128	1.043
801	gi|2655422	CDC37 [Gallus gallus]	879	54514	49	43	13	11	38.2	5.24	2.05	Quantitation summary for protein	129/126	1.327	16	[1.194]		130/126	1.229	16	1.338	*	131/126	1.263	16	1.267	*	129/127	1.077	16	1.216		130/127	0.979	16	[1.131]		131/127	1.035	16	1.167		129/128	0.726	16	[1.569]		130/128	0.659
802	gi|363734951	PREDICTED: adenylosuccinate synthetase isozyme 1 A [Gallus gallus]	879	67992	37	32	14	11	32.7	6.63	1.23	Quantitation summary for protein	129/126	0.744	32	[1.186]		130/126	1.077	32	[1.343]		131/126	0.917	32	[1.178]		129/127	0.528	32	1.166	*	130/127	0.75	32	1.112	*	131/127	0.657	32	1.147	*	129/128	0.787	32	1.171	*	130/128	1.117
803	gi|60098943	hypothetical protein RCJMB04_16d21 [Gallus gallus]	876	103495	47	33	19	15	27.3	5.9	0.75	Quantitation summary for protein	129/126	1.197	36	1.153	*	130/126	1.289	36	1.259	*	131/126	1.288	36	1.144	*	129/127	1.074	36	1.134	*	130/127	1.134	36	[1.158]		131/127	1.168	36	1.096	*	129/128	0.733	36	1.219	*	130/128	0.773
804	gi|50749406	PREDICTED: eukaryotic translation initiation factor 3 subunit F [Gallus gallus]	876	38099	26	25	8	8	28.3	5.34	1.5	Quantitation summary for protein	129/126	1.364	26	[1.105]		130/126	1.446	26	1.11	*	131/126	1.334	26	1.095	*	129/127	1.04	26	1.049	*	130/127	1.082	26	1.041	*	131/127	1.028	26	1.036	*	129/128	0.922	26	1.112	*	130/128	0.958
805	gi|98162715	developmentally regulated GTP binding protein 1 [Gallus gallus]	875	49714	29	27	9	8	23.7	8.96	1.03	Quantitation summary for protein	129/126	0.966	27	1.077	*	130/126	0.964	27	1.117		131/126	0.997	27	1.07		129/127	1.006	27	[1.047]		130/127	0.984	27	1.051		131/127	1.047	26	1.039	*	129/128	0.69	27	[1.076]		130/128	0.674
806	gi|211969	immunoglobulin heavy chain V-region, partial [Gallus gallus]	874	13079	26	23	4	4	35.7	7.88	4.07	Quantitation summary for protein	129/126	---	0	---		130/126	---	0	---		131/126	---	0	---		129/127	---	0	---		130/127	---	0	---		131/127	---	0	---		129/128	---	0	---		130/128	---
807	gi|363729624	PREDICTED: extended synaptotagmin-2 [Gallus gallus]	872	97939	43	35	20	16	32.2	7.71	1	Quantitation summary for protein	129/126	0.964	34	[1.145]		130/126	1.066	34	[1.205]		131/126	0.997	34	[1.138]		129/127	0.948	35	[1.067]		130/127	1.029	35	[1.073]		131/127	0.989	35	[1.062]		129/128	0.683	35	1.123	*	130/128	0.735
808	gi|53128696	hypothetical protein RCJMB04_5b12 [Gallus gallus]	871	66667	33	29	11	9	28.9	5	1.06	Quantitation summary for protein	129/126	1.223	22	1.105	*	130/126	1.468	22	1.173	*	131/126	1.081	22	1.104	*	129/127	0.992	22	1.058		130/127	1.167	22	1.06	*	131/127	0.885	22	1.066	*	129/128	1.465	22	1.12	*	130/128	1.722
809	gi|125149	RecName: Full=Adenylate kinase isoenzyme 1; Short=AK 1; AltName: Full=ATP-AMP transphosphorylase 1; AltName: Full=Myokinase	870	27054	36	31	13	10	51.5	8.68	5.41	Quantitation summary for protein	129/126	1.38	32	[1.104]		130/126	1.881	33	[1.175]		131/126	1.234	32	[1.098]		129/127	1.189	30	1.05	*	130/127	1.71	31	1.053	*	131/127	1.127	32	1.054	*	129/128	1.049	31	1.118	*	130/128	1.509
810	gi|53128405	hypothetical protein RCJMB04_4n15 [Gallus gallus]	870	111905	47	35	22	18	26.5	5.14	0.83	Quantitation summary for protein	129/126	1.318	30	1.072	*	130/126	1.171	31	[1.181]		131/126	1.351	31	1.073	*	129/127	1.077	31	[1.086]		130/127	0.939	32	1.065	*	131/127	1.115	32	[1.071]		129/128	0.531	31	[1.218]		130/128	0.463
811	gi|323444430	MHC class II antigen beta chain [Gallus gallus]	870	30868	43	26	8	7	35.7	6.97	2.78	Quantitation summary for protein	129/126	---	1	---		130/126	---	0	---		131/126	---	1	---		129/127	---	1	---		130/127	---	0	---		131/127	---	1	---		129/128	---	1	---		130/128	---
812	gi|60098469	hypothetical protein RCJMB04_2k14 [Gallus gallus]	870	87606	39	33	20	17	35.9	6.17	1.24	Quantitation summary for protein	129/126	0.922	34	1.084	*	130/126	1.101	34	1.16	*	131/126	1.124	34	1.092	*	129/127	0.922	35	[1.066]		130/127	1.014	33	1.038	*	131/127	1.134	35	1.068	*	129/128	0.506	35	1.125	*	130/128	0.591
813	gi|363741157	PREDICTED: cytospin-B [Gallus gallus]	867	140257	45	37	22	19	21.8	6.72	0.62	Quantitation summary for protein	129/126	1.113	38	1.065	*	130/126	1.179	38	[1.111]		131/126	1.132	38	1.07	*	129/127	0.99	38	1.067		130/127	0.985	36	1.044	*	131/127	1.017	38	1.062		129/128	0.835	38	1.113	*	130/128	0.866
814	gi|16323037	DEAD box protein DDX1 [Gallus gallus]	867	97208	34	29	18	16	27.2	6.64	1.07	Quantitation summary for protein	129/126	0.982	32	1.086		130/126	1.038	32	1.162		131/126	0.973	32	1.096		129/127	0.996	32	1.058		130/127	1.032	32	1.065	*	131/127	0.996	32	1.044		129/128	0.826	31	[1.179]		130/128	0.856
815	gi|24528161	endophilin II [Gallus gallus]	867	49955	33	27	14	11	38.4	5.31	1.78	Quantitation summary for protein	129/126	0.779	25	[1.139]		130/126	0.747	25	[1.305]		131/126	0.751	25	[1.157]		129/127	1.026	25	1.078		130/127	0.965	25	[1.092]		131/127	0.999	25	1.066		129/128	0.925	25	1.156	*	130/128	0.866
816	gi|14330324	aldo-keto reductase [Gallus gallus]	865	44353	50	40	15	14	42.9	7.63	2.39	Quantitation summary for protein	129/126	1.06	42	1.06	*	130/126	1.07	42	1.115	*	131/126	0.962	42	1.085	*	129/127	1.173	42	1.046	*	130/127	1.161	42	1.046	*	131/127	1.076	42	[1.044]		129/128	1.402	42	1.191	*	130/128	1.386
817	gi|118082572	PREDICTED: WW domain-binding protein 11 [Gallus gallus]	865	81718	46	39	14	13	22.7	6.7	0.8	Quantitation summary for protein	129/126	0.758	40	[1.091]		130/126	0.813	39	1.17	*	131/126	0.683	39	1.108	*	129/127	1.196	41	1.074	*	130/127	1.259	39	[1.067]		131/127	1.09	40	1.06	*	129/128	1.6	38	1.153	*	130/128	1.681
818	gi|5670257	reversion-induced LIM protein [Gallus gallus]	864	40626	43	36	9	8	27.9	6.72	1.99	Quantitation summary for protein	129/126	0.914	37	1.056	*	130/126	1.178	38	1.119	*	131/126	1.117	38	1.086	*	129/127	0.832	36	1.054	*	130/127	1.055	38	1.047	*	131/127	1.03	38	1.037	*	129/128	0.96	37	[1.089]		130/128	1.213
819	gi|50732786	PREDICTED: glycerol-3-phosphate dehydrogenase 1-like [Gallus gallus]	864	45837	43	36	13	12	31.7	6.55	2.26	Quantitation summary for protein	129/126	1.033	33	[1.120]		130/126	1.076	33	[1.211]		131/126	1.045	33	[1.158]		129/127	0.838	33	[1.063]		130/127	0.855	33	[1.043]		131/127	0.856	33	[1.041]		129/128	0.581	33	[1.116]		130/128	0.592
820	gi|32967298	calcineurin A alpha, partial [Gallus gallus]	863	64437	30	26	12	10	22.6	5.9	0.73	Quantitation summary for protein	129/126	0.888	18	1.041	*	130/126	0.888	17	1.047	*	131/126	0.789	18	1.063	*	129/127	1.21	18	[1.072]		130/127	1.212	18	1.071	*	131/127	1.086	18	1.067	*	129/128	0.833	18	1.039	*	130/128	0.828
821	gi|118098010	PREDICTED: nodal modulator 1 [Gallus gallus]	863	150018	31	26	11	10	11.1	5.42	0.29	Quantitation summary for protein	129/126	1.046	29	1.069	*	130/126	0.849	29	1.101	*	131/126	0.913	29	1.074	*	129/127	1.301	29	1.044	*	130/127	1.036	29	1.042	*	131/127	1.147	29	1.034	*	129/128	1.741	29	[1.107]		130/128	1.385
822	gi|363745440	PREDICTED: importin subunit beta-1-like [Gallus gallus]	863	106649	33	29	14	13	20.2	4.69	0.78	Quantitation summary for protein	129/126	0.745	28	[1.127]		130/126	0.922	27	1.113	*	131/126	1.115	28	1.103	*	129/127	0.671	29	1.112	*	130/127	0.822	30	1.053	*	131/127	1.016	30	1.054		129/128	0.227	29	1.183	*	130/128	0.277
823	gi|363739598	PREDICTED: protein kinase C beta type [Gallus gallus]	863	89469	44	32	16	14	24.5	6.62	0.78	Quantitation summary for protein	129/126	0.893	28	1.064	*	130/126	0.903	29	1.098	*	131/126	0.883	29	[1.093]		129/127	0.7	28	1.079	*	130/127	0.708	29	[1.071]		131/127	0.708	28	1.073	*	129/128	0.378	29	1.145	*	130/128	0.379
824	gi|60098555	hypothetical protein RCJMB04_3l20 [Gallus gallus]	863	50541	45	37	16	15	31.8	8.19	2.32	Quantitation summary for protein	129/126	1.245	39	1.12	*	130/126	1.283	39	[1.222]		131/126	1.107	39	[1.124]		129/127	1.023	39	[1.080]		130/127	1.034	39	[1.067]		131/127	0.916	38	1.051	*	129/128	0.896	39	1.176	*	130/128	0.905
825	gi|212258	macrophage migration inhibitory factor [Gallus gallus]	862	14538	30	27	4	4	31.3	6.88	4.38	Quantitation summary for protein	129/126	1.127	26	1.194	*	130/126	1.224	27	[1.398]		131/126	1.03	27	1.224		129/127	0.897	27	[1.137]		130/127	0.956	28	1.111	*	131/127	0.828	28	[1.123]		129/128	1.029	27	[1.159]		130/128	1.095
826	gi|53130426	hypothetical protein RCJMB04_7m14 [Gallus gallus]	862	103504	40	36	19	17	26.6	5.38	0.92	Quantitation summary for protein	129/126	1.168	35	1.098	*	130/126	1.285	35	1.149	*	131/126	1.199	35	[1.101]		129/127	0.9	37	1.076	*	130/127	0.982	37	1.052	*	131/127	0.939	36	1.056	*	129/128	0.285	38	1.143	*	130/128	0.31
827	gi|363735389	PREDICTED: SEC23-interacting protein [Gallus gallus]	862	123679	33	30	14	12	19.6	5.2	0.44	Quantitation summary for protein	129/126	1.087	31	[1.203]		130/126	1.156	31	[1.227]		131/126	1.146	31	[1.211]		129/127	0.984	31	[1.098]		130/127	1.026	31	[1.106]		131/127	1.047	31	[1.094]		129/128	0.767	31	[1.173]		130/128	0.799
828	gi|409578	MHC class II beta chain [Gallus gallus]	862	31453	44	28	8	8	29.3	6.24	2.34	Quantitation summary for protein	129/126	---	0	---		130/126	---	0	---		131/126	---	0	---		129/127	---	0	---		130/127	---	0	---		131/127	---	0	---		129/128	---	0	---		130/128	---
829	gi|118097222	PREDICTED: eukaryotic peptide chain release factor subunit 1 [Gallus gallus]	861	57936	33	27	9	8	24.3	5.51	0.74	Quantitation summary for protein	129/126	1.292	30	1.08	*	130/126	1.545	30	1.133	*	131/126	1.197	30	1.081	*	129/127	0.98	30	1.053	*	130/127	1.149	30	1.04	*	131/127	0.917	30	1.047	*	129/128	0.667	30	1.138	*	130/128	0.781
830	gi|60098769	hypothetical protein RCJMB04_8c13 [Gallus gallus]	861	36944	35	25	13	9	32.9	4.13	2.05	Quantitation summary for protein	129/126	1.224	26	[1.188]		130/126	1.341	26	[1.330]		131/126	1.199	26	[1.217]		129/127	0.93	26	[1.085]		130/127	0.999	26	[1.096]		131/127	0.92	26	1.061	*	129/128	1.346	26	[1.187]		130/128	1.444
831	gi|1054940	cSH-PTP2 [Gallus gallus]	859	79052	29	27	6	6	11.8	6.74	0.33	Quantitation summary for protein	129/126	0.957	19	1.093	*	130/126	0.965	19	[1.127]		131/126	0.925	19	1.077	*	129/127	1.014	19	1.069		130/127	1.002	19	1.054		131/127	0.978	18	1.062		129/128	0.624	19	[1.147]		130/128	0.616
832	gi|53130482	hypothetical protein RCJMB04_8c12 [Gallus gallus]	859	66398	31	29	9	8	24.5	5.4	0.79	Quantitation summary for protein	129/126	0.978	10	1.058		130/126	0.78	10	1.058	*	131/126	0.991	10	1.077		129/127	1.452	10	[1.086]		130/127	1.136	10	1.069	*	131/127	1.485	10	1.118	*	129/128	0.825	10	1.046	*	130/128	0.645
833	gi|60098467	hypothetical protein RCJMB04_2k8 [Gallus gallus]	859	28491	34	32	10	9	44.9	9.17	3.2	Quantitation summary for protein	129/126	1.023	10	1.108		130/126	0.828	10	1.08	*	131/126	1.178	10	1.082	*	129/127	1.076	10	1.203		130/127	0.812	9	1.096	*	131/127	1.251	10	1.199	*	129/128	0.357	10	1.125	*	130/128	0.283
834	gi|312597529	Chain B, Crystal Structures Of The Chicken Yf17.1 Molecule	857	13062	35	28	7	6	80.8	5.47	5.4	Quantitation summary for protein	129/126	0.722	32	1.173	*	130/126	0.704	32	[1.287]		131/126	0.943	32	[1.163]		129/127	0.877	32	1.106	*	130/127	0.839	32	1.117	*	131/127	1.156	32	1.085	*	129/128	1.929	32	1.18	*	130/128	1.843
835	gi|365813051	Chain A, The Siderocalin Ex-Fabp Functions Through Dual Ligand Specificities	855	21255	34	27	8	7	41.2	5.94	2.75	Quantitation summary for protein	129/126	2.115	29	[1.305]		130/126	2.763	29	1.464	*	131/126	1.124	28	1.268	*	129/127	2.3	29	1.188	*	130/127	2.945	29	[1.234]		131/127	1.231	28	[1.103]		129/128	2.56	29	[1.259]		130/128	3.276
836	gi|53131155	hypothetical protein RCJMB04_11f2 [Gallus gallus]	853	26282	37	31	10	7	48	6.75	4.32	Quantitation summary for protein	129/126	0.944	36	1.048	*	130/126	0.854	36	1.079	*	131/126	0.888	36	1.05	*	129/127	1.07	36	1.038	*	130/127	0.949	36	1.044	*	131/127	1.016	36	[1.036]		129/128	1.056	36	[1.094]		130/128	0.935
837	gi|53136022	hypothetical protein RCJMB04_26h2 [Gallus gallus]	853	89340	27	22	11	9	18.6	6.03	0.66	Quantitation summary for protein	129/126	1.395	25	1.08	*	130/126	1.045	25	1.1	*	131/126	1.344	25	1.085	*	129/127	1.545	25	1.05	*	130/127	1.043	26	1.036	*	131/127	1.382	26	[1.061]		129/128	1.153	26	[1.087]		130/128	0.848
838	gi|118100027	PREDICTED: huntingtin-interacting protein 1 [Gallus gallus]	852	128860	26	22	11	9	10.4	5.56	0.35	Quantitation summary for protein	129/126	0.965	21	1.061	*	130/126	1.144	20	1.083	*	131/126	1.037	21	1.069	*	129/127	0.897	21	1.064	*	130/127	1.015	21	1.057		131/127	0.973	21	1.036	*	129/128	0.369	21	[1.138]		130/128	0.418
839	gi|53136612	hypothetical protein RCJMB04_31j17 [Gallus gallus]	851	134743	28	21	14	9	16.8	5	0.33	Quantitation summary for protein	129/126	1.075	23	[1.115]		130/126	1.087	23	[1.193]		131/126	1.081	23	1.11	*	129/127	1.001	23	[1.076]		130/127	0.992	23	[1.098]		131/127	1.016	23	[1.087]		129/128	1.361	23	[1.162]		130/128	1.348
840	gi|50729038	PREDICTED: aldo-keto reductase family 1 member B10 [Gallus gallus]	851	42618	67	48	21	18	61.1	7.08	6.51	Quantitation summary for protein	129/126	1.132	26	1.128	*	130/126	1.496	26	1.236	*	131/126	1.079	26	1.123	*	129/127	0.821	27	1.072	*	130/127	1.066	27	1.087	*	131/127	0.79	27	1.08	*	129/128	0.755	27	1.185	*	130/128	0.979
841	gi|12034955	manganese-containing superoxide dismutase precursor [Gallus gallus]	851	28596	28	22	7	5	28.6	8.6	1.16	Quantitation summary for protein	129/126	1.467	24	1.093	*	130/126	2.025	24	1.189	*	131/126	1.41	24	1.093	*	129/127	0.916	24	[1.070]		130/127	1.24	24	1.11	*	131/127	0.889	24	[1.064]		129/128	1.601	24	1.221	*	130/128	2.165
842	gi|53133308	hypothetical protein RCJMB04_15f6 [Gallus gallus]	850	87887	41	38	17	15	25.5	5.84	0.93	Quantitation summary for protein	129/126	1.003	36	1.086		130/126	0.952	36	[1.127]		131/126	0.96	36	1.093	*	129/127	1.063	35	1.052	*	130/127	0.989	35	1.072		131/127	1.027	35	1.043	*	129/128	1.257	36	[1.161]		130/128	1.168
843	gi|226958424	protein kinase C and casein kinase substrate in neurons protein 2 isoform 1 [Gallus gallus]	850	67538	26	23	13	10	29.1	5.11	0.69	Quantitation summary for protein	129/126	1.414	23	1.125	*	130/126	1.6	23	1.147	*	131/126	1.529	23	1.167	*	129/127	1.009	23	1.097		130/127	1.119	23	1.082	*	131/127	1.104	22	1.059	*	129/128	0.765	23	[1.137]		130/128	0.847
844	gi|357593601	protein tyrosine phosphatase, non-receptor type 11-like [Gallus gallus]	849	78423	47	35	14	11	28.4	7.6	0.85	Quantitation summary for protein	129/126	0.919	30	1.094	*	130/126	1.003	30	1.166		131/126	0.951	30	1.118	*	129/127	0.766	30	[1.090]		130/127	0.82	30	1.078	*	131/127	0.801	30	[1.089]		129/128	0.663	30	1.163	*	130/128	0.71
845	gi|53133330	hypothetical protein RCJMB04_15i13 [Gallus gallus]	848	63568	45	39	12	11	32.6	8.38	1.24	Quantitation summary for protein	129/126	0.899	42	[1.100]		130/126	0.707	42	[1.143]		131/126	0.727	42	[1.114]		129/127	0.981	42	[1.053]		130/127	0.757	42	[1.056]		131/127	0.802	41	1.04	*	129/128	1.548	42	[1.098]		130/128	1.193
846	gi|363742739	PREDICTED: interleukin enhancer-binding factor 2 homolog [Gallus gallus]	847	47277	43	34	12	11	35.9	5.26	1.75	Quantitation summary for protein	129/126	1.114	36	[1.111]		130/126	1.241	36	1.171	*	131/126	1.065	36	[1.105]		129/127	0.893	35	1.052	*	130/127	0.97	36	1.065	*	131/127	0.859	35	1.045	*	129/128	0.689	36	1.113	*	130/128	0.752
847	gi|12656073	ubiquitin fusion-degradation 1-like protein [Gallus gallus]	847	39638	46	34	8	8	28	6.26	1.42	Quantitation summary for protein	129/126	0.908	39	[1.044]		130/126	0.827	39	[1.065]		131/126	0.803	39	[1.044]		129/127	1.111	39	1.031	*	130/127	0.993	39	[1.029]		131/127	0.993	39	1.027		129/128	1.555	39	[1.074]		130/128	1.388
848	gi|53127756	hypothetical protein RCJMB04_3e17 [Gallus gallus]	845	52571	51	35	22	16	51.7	6.3	2.8	Quantitation summary for protein	129/126	1.296	31	1.12	*	130/126	1.768	31	[1.234]		131/126	1.356	31	1.135	*	129/127	0.879	31	[1.081]		130/127	1.176	31	1.065	*	131/127	0.929	31	[1.060]		129/128	0.96	31	1.145		130/128	1.283
849	gi|98162705	interleukin 16 [Gallus gallus]	843	86875	46	34	17	13	22.6	5.96	0.95	Quantitation summary for protein	129/126	0.752	39	[1.155]		130/126	1.073	39	[1.237]		131/126	0.914	39	[1.158]		129/127	0.677	39	1.112	*	130/127	0.947	39	1.112	*	131/127	0.831	39	1.096	*	129/128	0.716	38	1.23	*	130/128	1.003
850	gi|313661436	D-tyrosyl-tRNA(Tyr) deacylase 1 [Gallus gallus]	842	27762	17	17	5	5	34.3	6.92	0.76	Quantitation summary for protein	129/126	0.713	16	1.108	*	130/126	0.56	16	[1.167]		131/126	0.576	16	1.123	*	129/127	1.381	16	1.094	*	130/127	1.064	16	1.078	*	131/127	1.127	16	1.088	*	129/128	2.811	16	1.246	*	130/128	2.163
851	gi|53134209	hypothetical protein RCJMB04_22n3 [Gallus gallus]	840	38172	41	36	17	16	63.2	5.63	3.11	Quantitation summary for protein	129/126	1.231	32	1.069	*	130/126	1.673	32	1.115	*	131/126	1.252	32	1.073	*	129/127	0.895	32	[1.076]		130/127	1.181	30	1.037	*	131/127	0.923	31	1.04	*	129/128	0.539	32	1.156	*	130/128	0.718
852	gi|53133498	hypothetical protein RCJMB04_17e23 [Gallus gallus]	839	57614	35	31	11	11	29.3	5.93	1.06	Quantitation summary for protein	129/126	0.975	31	1.098		130/126	0.952	31	[1.149]		131/126	0.931	31	1.099	*	129/127	1.021	31	1.063		130/127	0.977	31	1.062	*	131/127	0.985	31	1.052		129/128	1.306	31	[1.086]		130/128	1.249
853	gi|50760914	PREDICTED: ran-binding protein 3 [Gallus gallus]	839	63490	42	35	12	11	29	4.7	0.93	Quantitation summary for protein	129/126	1.215	35	1.089	*	130/126	1.532	35	1.141	*	131/126	1.3	35	[1.144]		129/127	1	35	1.069		130/127	1.237	35	1.043	*	131/127	1.081	35	1.052	*	129/128	0.965	35	1.062	*	130/128	1.192
854	gi|50751150	PREDICTED: calcyclin-binding protein [Gallus gallus]	839	33483	46	36	17	15	65.2	8.59	4.47	Quantitation summary for protein	129/126	1.201	39	[1.069]		130/126	1.16	39	1.169	*	131/126	1.152	38	1.069	*	129/127	1.277	39	[1.077]		130/127	1.21	39	1.069	*	131/127	1.374	39	[1.059]		129/128	1.652	39	1.166	*	130/128	1.595
855	gi|53139480	transporter associated with antigen processing 1 [Gallus gallus]	838	66363	35	28	12	10	22	6.86	0.97	Quantitation summary for protein	129/126	0.851	35	[1.113]		130/126	1.059	35	1.145	*	131/126	1.067	35	1.113	*	129/127	0.79	35	1.051	*	130/127	0.964	35	1.055	*	131/127	1.001	35	1.055		129/128	0.414	35	1.212	*	130/128	0.505
856	gi|50752811	PREDICTED: ras-related protein Rab-8B [Gallus gallus]	838	27398	33	30	11	9	46.8	5.43	3.44	Quantitation summary for protein	129/126	0.873	8	1.12	*	130/126	0.734	8	1.109	*	131/126	0.943	8	1.113		129/127	0.893	8	[1.066]		130/127	0.735	7	1.077	*	131/127	0.973	8	1.077		129/128	0.406	8	1.21	*	130/128	0.334
857	gi|53130638	hypothetical protein RCJMB04_9b24 [Gallus gallus]	837	27089	38	31	13	11	56.3	5.85	6.2	Quantitation summary for protein	129/126	1.245	25	1.113	*	130/126	1.517	25	1.167	*	131/126	1.409	25	1.122	*	129/127	0.657	25	1.11	*	130/127	0.786	25	[1.088]		131/127	0.752	25	1.084	*	129/128	0.553	25	[1.243]		130/128	0.66
858	gi|363746230	PREDICTED: ubiquitin thioesterase OTUB1-like [Gallus gallus]	837	34020	25	20	10	8	41.9	5	1.79	Quantitation summary for protein	129/126	1.002	20	1.215		130/126	1.376	20	1.294	*	131/126	1.162	19	1.197	*	129/127	0.786	19	1.128	*	130/127	1.054	20	[1.087]		131/127	0.917	19	[1.112]		129/128	0.52	19	1.202	*	130/128	0.766
859	gi|118091572	PREDICTED: rho GTPase-activating protein 1 [Gallus gallus]	837	57760	43	36	12	12	32.3	6.16	1.17	Quantitation summary for protein	129/126	0.949	38	1.077	*	130/126	0.888	38	[1.123]		131/126	0.93	38	1.075	*	129/127	1.05	38	1.056	*	130/127	0.964	38	1.048	*	131/127	1.039	38	1.052	*	129/128	0.95	38	[1.123]		130/128	0.871
860	gi|363738476	PREDICTED: stabilin-1 [Gallus gallus]	836	305661	44	32	17	12	7	6.5	0.16	Quantitation summary for protein	129/126	1.196	33	1.057	*	130/126	1.159	33	1.073	*	131/126	1.137	33	1.05	*	129/127	1.213	33	1.036	*	130/127	1.152	34	1.026	*	131/127	1.164	34	1.028	*	129/128	1.004	33	1.052		130/128	0.953
861	gi|85544000	Chain A, Avian Respiratory Complex Ii With Oxaloacetate And Ubiquinone	835	75056	28	23	10	8	20.3	6.17	0.67	Quantitation summary for protein	129/126	1.02	23	1.098		130/126	1.013	23	1.129		131/126	1.014	23	1.091		129/127	1	23	[1.074]		130/127	0.973	23	[1.073]		131/127	1.004	23	[1.083]		129/128	0.649	23	1.178	*	130/128	0.631
862	gi|363729116	PREDICTED: importin-5 [Gallus gallus]	834	145224	35	30	14	13	14.5	4.89	0.37	Quantitation summary for protein	129/126	0.84	32	[1.074]		130/126	0.97	33	[1.097]		131/126	1.094	33	[1.091]		129/127	0.845	32	[1.041]		130/127	0.957	32	1.038	*	131/127	1.112	32	1.039	*	129/128	0.291	32	1.109	*	130/128	0.329
863	gi|363740917	PREDICTED: 39S ribosomal protein L12, mitochondrial [Gallus gallus]	832	25254	27	24	7	6	29.9	9.66	1.7	Quantitation summary for protein	129/126	0.971	25	[1.076]		130/126	0.813	25	1.101	*	131/126	0.902	25	1.076	*	129/127	1.259	25	1.042	*	130/127	1.034	25	1.038	*	131/127	1.176	24	1.031	*	129/128	2.519	25	[1.095]		130/128	2.067
864	gi|118094828	PREDICTED: WD repeat-containing protein 33 [Gallus gallus]	832	156009	28	24	11	10	13	9.18	0.26	Quantitation summary for protein	129/126	1.048	27	1.061	*	130/126	0.998	27	1.072		131/126	1.058	27	1.06	*	129/127	1.112	27	1.041	*	130/127	1.038	27	1.062	*	131/127	1.133	27	1.041	*	129/128	1.447	27	1.095	*	130/128	1.35
865	gi|60099255	hypothetical protein RCJMB04_39i8 [Gallus gallus]	830	54635	28	23	10	9	22.6	9.25	1.14	Quantitation summary for protein	129/126	0.841	27	[1.129]		130/126	0.735	17	1.09	*	131/126	0.864	27	1.129	*	129/127	1.063	27	1.098	*	130/127	0.932	27	[1.112]		131/127	1.103	27	[1.106]		129/128	1.624	27	[1.183]		130/128	1.423
866	gi|363743527	PREDICTED: membrane primary amine oxidase isoform 2 [Gallus gallus]	827	89295	36	33	14	13	26.1	6.07	0.91	Quantitation summary for protein	129/126	0.85	33	1.064	*	130/126	0.916	34	1.081	*	131/126	0.859	34	1.047	*	129/127	0.786	33	[1.064]		130/127	0.831	33	[1.035]		131/127	0.803	33	1.062	*	129/128	0.51	33	[1.127]		130/128	0.539
867	gi|161513243	immunoglobulin heavy chain variable region [Gallus gallus]	826	14347	22	20	3	3	32.5	5.55	2.6	Quantitation summary for protein	129/126	---	0	---		130/126	---	0	---		131/126	---	0	---		129/127	---	0	---		130/127	---	0	---		131/127	---	0	---		129/128	---	0	---		130/128	---
868	gi|3184514	GTPase cRhoA [Gallus gallus]	825	26235	34	29	10	7	50.3	5.83	3.22	Quantitation summary for protein	129/126	1.101	29	[1.073]		130/126	0.888	29	[1.120]		131/126	1.167	29	[1.085]		129/127	1.099	30	[1.061]		130/127	0.869	30	[1.057]		131/127	1.177	30	[1.053]		129/128	0.514	30	1.135	*	130/128	0.406
869	gi|50745986	PREDICTED: prefoldin subunit 3 [Gallus gallus]	824	27640	38	34	15	13	59.5	6.01	5.93	Quantitation summary for protein	129/126	0.924	37	1.077	*	130/126	0.876	37	1.15	*	131/126	0.914	37	[1.075]		129/127	1.057	38	1.042	*	130/127	0.983	38	[1.054]		131/127	1.056	37	1.038	*	129/128	1.233	38	1.139	*	130/128	1.145
870	gi|323444442	MHC class II antigen beta chain [Gallus gallus]	820	30684	44	25	9	6	39.9	6.12	2.82	Quantitation summary for protein	129/126	---	0	---		130/126	---	0	---		131/126	---	0	---		129/127	---	0	---		130/127	---	0	---		131/127	---	0	---		129/128	---	0	---		130/128	---
871	gi|118099099	PREDICTED: UDP-N-acteylglucosamine pyrophosphorylase 1-like 1 [Gallus gallus]	820	64075	42	36	19	15	45.3	6.11	1.46	Quantitation summary for protein	129/126	1.198	33	[1.079]		130/126	1.069	34	1.112	*	131/126	1.023	34	[1.083]		129/127	1.298	33	1.047	*	130/127	1.135	34	1.049	*	131/127	1.119	34	1.036	*	129/128	1.078	33	1.117	*	130/128	0.941
872	gi|319803085	GTP-binding protein 1 [Gallus gallus]	817	82478	32	32	8	8	18.4	8.66	0.42	Quantitation summary for protein	129/126	0.726	32	1.081	*	130/126	0.747	31	1.079	*	131/126	0.778	32	1.079	*	129/127	1.031	32	[1.068]		130/127	0.963	32	1.042	*	131/127	1.116	32	[1.053]		129/128	0.799	32	[1.088]		130/128	0.745
873	gi|63472	unnamed protein product [Gallus gallus]	817	14110	42	35	10	8	64.1	11.36	24.75	Quantitation summary for protein	129/126	0.777	36	[1.078]		130/126	1.157	36	[1.159]		131/126	0.989	36	[1.082]		129/127	0.384	36	1.084	*	130/127	0.562	37	1.067	*	131/127	0.49	37	1.065	*	129/128	1.047	37	1.092	*	130/128	1.554
874	gi|99028876	ADP-ribosylation factor GTPase activating protein 2 [Gallus gallus]	816	66148	29	28	13	13	28.2	7.1	0.97	Quantitation summary for protein	129/126	0.988	28	1.068		130/126	1.007	28	1.142		131/126	0.899	28	[1.126]		129/127	1.272	28	[1.068]		130/127	1.271	28	[1.091]		131/127	1.168	28	[1.057]		129/128	0.926	28	[1.108]		130/128	0.925
875	gi|63066	unnamed protein product [Gallus gallus]	814	51176	46	30	20	15	43.7	8.22	2.95	Quantitation summary for protein	129/126	1.109	32	1.142	*	130/126	1.182	32	1.235	*	131/126	1.117	32	1.157	*	129/127	0.966	33	1.066	*	130/127	1.011	33	[1.074]		131/127	0.983	33	[1.052]		129/128	1.125	33	[1.203]		130/128	1.177
876	gi|62635476	core-binding factor beta [Gallus gallus]	814	23825	18	16	6	6	34.1	6.23	1.51	Quantitation summary for protein	129/126	0.666	3	1.118	*	130/126	0.847	3	[1.198]		131/126	0.636	3	1.189	*	129/127	1.006	3	[1.026]		130/127	1.256	3	1.304		131/127	0.971	3	1.106		129/128	0.712	3	1.535		130/128	0.889
877	gi|363736170	PREDICTED: N-myc-interactor [Gallus gallus]	813	48378	34	29	15	14	49.7	5.11	1.69	Quantitation summary for protein	129/126	0.9	29	1.174	*	130/126	0.883	28	1.189	*	131/126	0.914	29	1.206	*	129/127	0.864	29	[1.094]		130/127	0.82	29	1.061	*	131/127	0.886	29	1.073	*	129/128	1.058	29	[1.272]		130/128	1.003
878	gi|53133870	hypothetical protein RCJMB04_21f9 [Gallus gallus]	813	55700	34	27	15	13	44	7.12	1.51	Quantitation summary for protein	129/126	1.351	28	1.077	*	130/126	1.064	28	1.078	*	131/126	1.239	28	1.073	*	129/127	1.485	27	1.075	*	130/127	1.146	27	[1.055]		131/127	1.375	27	[1.077]		129/128	1.353	26	1.082	*	130/128	0.949
879	gi|363738693	PREDICTED: cAMP-dependent protein kinase type II-alpha regulatory subunit-like [Gallus gallus]	813	50971	32	31	16	15	40	4.8	2.5	Quantitation summary for protein	129/126	0.775	28	1.167	*	130/126	0.834	28	[1.306]		131/126	0.87	28	[1.204]		129/127	0.87	28	[1.117]		130/127	0.919	28	1.083	*	131/127	0.986	28	1.075		129/128	0.788	28	1.216	*	130/128	0.894
880	gi|60098921	hypothetical protein RCJMB04_15g18 [Gallus gallus]	811	54957	35	30	15	12	27.7	4.82	1.69	Quantitation summary for protein	129/126	1.05	2	1.4		130/126	1.833	2	1.693		131/126	1.106	2	1.365		129/127	0.761	2	1.048		130/127	1.303	2	1.154		131/127	0.81	2	1.075		129/128	0.23	2	1.293		130/128	0.394
881	gi|363740546	PREDICTED: nuclear pore complex protein Nup214 [Gallus gallus]	810	233330	30	26	16	13	10.7	6.6	0.23	Quantitation summary for protein	129/126	1.111	27	1.088	*	130/126	1.111	27	1.124	*	131/126	1.006	27	1.104		129/127	1.227	27	[1.116]		130/127	1.203	27	1.12	*	131/127	1.121	27	[1.093]		129/128	1.441	27	1.107	*	130/128	1.393
882	gi|197304481	MHC class II beta chain 2 [Gallus gallus]	805	30636	37	29	10	10	43.3	6.45	2.82	Quantitation summary for protein	129/126	---	1	---		130/126	---	1	---		131/126	---	1	---		129/127	---	1	---		130/127	---	1	---		131/127	---	1	---		129/128	---	1	---		130/128	---
883	gi|53133328	hypothetical protein RCJMB04_15i11 [Gallus gallus]	802	52541	23	22	7	7	22.4	5.66	0.63	Quantitation summary for protein	129/126	1.038	22	1.092		130/126	1.11	21	1.115	*	131/126	1.151	22	1.089	*	129/127	0.942	22	1.048	*	130/127	0.966	22	1.047	*	131/127	1.055	22	[1.052]		129/128	0.429	22	[1.178]		130/128	0.439
884	gi|53130724	hypothetical protein RCJMB04_9l5 [Gallus gallus]	802	28315	24	20	7	6	38.7	6.43	2.04	Quantitation summary for protein	129/126	1.428	23	1.099	*	130/126	1.363	23	1.097	*	131/126	1.283	23	1.086	*	129/127	1.052	23	1.043	*	130/127	0.984	23	1.031	*	131/127	0.954	23	1.044	*	129/128	1.165	23	[1.136]		130/128	1.089
885	gi|53135495	hypothetical protein RCJMB04_25e17 [Gallus gallus]	801	25743	41	28	9	7	36.5	5.33	2.82	Quantitation summary for protein	129/126	1.527	32	1.087	*	130/126	2.01	32	[1.175]		131/126	1.552	32	1.11	*	129/127	0.914	33	[1.059]		130/127	1.186	33	[1.067]		131/127	0.94	33	[1.041]		129/128	0.757	33	[1.213]		130/128	0.981
886	gi|363744257	PREDICTED: beta-hexosaminidase subunit beta [Gallus gallus]	801	68868	38	28	11	8	20.1	5.96	0.92	Quantitation summary for protein	129/126	1.24	29	1.145	*	130/126	1.654	29	1.214	*	131/126	1.393	29	1.152	*	129/127	0.733	29	1.085	*	130/127	0.959	29	1.091	*	131/127	0.832	29	1.07	*	129/128	1.291	29	1.197	*	130/128	1.687
887	gi|363734959	PREDICTED: protein AHNAK2-like [Gallus gallus]	801	193442	21	21	8	8	7.2	6.3	0.16	Quantitation summary for protein	129/126	1.066	20	1.163		130/126	1.423	21	[1.270]		131/126	0.782	20	1.142	*	129/127	1.125	21	1.076	*	130/127	1.465	21	[1.110]		131/127	0.832	21	1.047	*	129/128	1.937	21	[1.231]		130/128	2.521
888	gi|363744876	PREDICTED: hydroxysteroid dehydrogenase-like protein 2-like isoform 1 [Gallus gallus]	801	53084	42	30	15	13	41.2	8.5	1.96	Quantitation summary for protein	129/126	1.191	37	[1.095]		130/126	1.218	37	1.146	*	131/126	1.134	37	[1.097]		129/127	0.96	37	1.047	*	130/127	0.962	37	1.033	*	131/127	0.922	37	1.046	*	129/128	0.773	37	1.132	*	130/128	0.774
889	gi|118089619	PREDICTED: serine/threonine-protein kinase PAK 3 isoform 2 [Gallus gallus]	800	70785	31	30	11	10	19.5	5.27	0.89	Quantitation summary for protein	129/126	0.927	8	1.195		130/126	0.69	8	1.219	*	131/126	0.784	8	1.205	*	129/127	1.155	8	1.167	*	130/127	0.842	8	1.25		131/127	0.986	8	1.144		129/128	1.72	8	1.183	*	130/128	1.254
890	gi|53130692	hypothetical protein RCJMB04_9i8 [Gallus gallus]	799	105157	50	44	19	17	24.6	5.32	0.79	Quantitation summary for protein	129/126	0.985	45	1.064		130/126	1.21	45	[1.118]		131/126	1.05	45	1.07	*	129/127	0.96	45	1.043	*	130/127	1.156	45	1.031	*	131/127	1.034	45	[1.039]		129/128	0.559	45	[1.085]		130/128	0.672
891	gi|161513303	immunoglobulin heavy chain variable region [Gallus gallus]	796	14413	27	21	5	5	40.3	5.85	5.73	Quantitation summary for protein	129/126	---	0	---		130/126	---	0	---		131/126	---	0	---		129/127	---	0	---		130/127	---	0	---		131/127	---	0	---		129/128	---	0	---		130/128	---
892	gi|363737620	PREDICTED: pleckstrin homology domain-containing family O member 2 [Gallus gallus]	796	77613	32	27	14	11	31.3	5.38	0.94	Quantitation summary for protein	129/126	0.848	28	1.101	*	130/126	0.919	28	1.127	*	131/126	0.855	26	1.112	*	129/127	1.151	27	1.082	*	130/127	1.225	27	1.079	*	131/127	1.171	25	1.067	*	129/128	0.813	26	1.12	*	130/128	0.863
893	gi|53130046	hypothetical protein RCJMB04_6g17 [Gallus gallus]	796	63603	29	23	10	7	25.3	4.8	0.83	Quantitation summary for protein	129/126	1.168	12	1.168	*	130/126	1.634	12	1.234	*	131/126	1.242	12	1.194	*	129/127	0.816	12	1.092	*	130/127	1.121	12	1.027	*	131/127	0.876	13	1.085	*	129/128	0.493	12	1.118	*	130/128	0.676
894	gi|63494	HMG2a [Gallus gallus]	796	32623	58	37	14	12	50	8.18	3.28	Quantitation summary for protein	129/126	0.646	40	[1.156]		130/126	0.691	40	[1.318]		131/126	0.606	40	[1.167]		129/127	0.973	40	1.057	*	130/127	1.021	40	[1.095]		131/127	0.922	40	1.048	*	129/128	0.768	40	1.231	*	130/128	0.805
895	gi|53133828	hypothetical protein RCJMB04_20k18 [Gallus gallus]	795	33633	25	22	9	8	36.8	5.79	1.56	Quantitation summary for protein	129/126	1.21	21	1.094	*	130/126	0.942	21	[1.162]		131/126	1.062	20	1.083	*	129/127	1.304	22	[1.080]		130/127	1	22	1.071		131/127	1.158	21	1.049	*	129/128	0.913	22	[1.209]		130/128	0.7
896	gi|50728374	PREDICTED: 40S ribosomal protein S16 [Gallus gallus]	792	20413	55	42	15	13	67.8	10.21	14.52	Quantitation summary for protein	129/126	1.041	46	[1.159]		130/126	0.782	46	[1.207]		131/126	1.026	46	[1.178]		129/127	1.309	45	1.052	*	130/127	0.935	46	1.058	*	131/127	1.263	46	1.058	*	129/128	0.651	46	[1.180]		130/128	0.479
897	gi|211987	immunoglobulin heavy chain V-region, partial [Gallus gallus]	791	12794	26	20	5	5	49.1	7.86	7.49	Quantitation summary for protein	129/126	---	0	---		130/126	---	0	---		131/126	---	0	---		129/127	---	0	---		130/127	---	0	---		131/127	---	0	---		129/128	---	0	---		130/128	---
898	gi|444792	Na/K ATPase:SUBUNIT=beta1	791	42149	31	24	8	6	31.1	8.27	0.83	Quantitation summary for protein	129/126	0.973	25	1.066	*	130/126	1.135	25	1.074	*	131/126	0.933	24	1.052	*	129/127	1.03	24	1.028	*	130/127	1.175	25	1.033	*	131/127	0.975	25	1.03	*	129/128	0.701	25	1.034	*	130/128	0.8
899	gi|311771659	cytochrome c oxidase subunit 7A2, mitochondrial [Gallus gallus]	790	11194	29	28	3	3	30.1	10.16	7.54	Quantitation summary for protein	129/126	1.256	29	1.061	*	130/126	1.473	29	[1.214]		131/126	1.3	29	1.093	*	129/127	0.94	29	1.08	*	130/127	1.081	29	[1.114]		131/127	0.982	29	1.062		129/128	1.737	29	[1.226]		130/128	1.995
900	gi|122723	RecName: Full=Hemoglobin subunit epsilon; AltName: Full=Epsilon-globin; AltName: Full=Hemoglobin epsilon chain	789	19285	109	57	7	6	33.3	9.07	12.08	Quantitation summary for protein	129/126	1.21	2	1.078		130/126	1.26	2	1.052		131/126	0.834	2	1.161		129/127	0.619	2	1.091		130/127	0.632	2	1.04	*	131/127	0.431	2	1.175		129/128	0.798	2	1.007	*	130/128	0.813
901	gi|17025728	tax-responsive element binding protein 107 [Gallus gallus]	789	47423	45	33	15	10	38.6	10.67	1.93	Quantitation summary for protein	129/126	0.792	36	1.093	*	130/126	0.808	36	1.133	*	131/126	0.65	36	[1.109]		129/127	1.006	36	1.047		130/127	1.007	36	[1.062]		131/127	0.833	36	1.055	*	129/128	0.501	36	1.163	*	130/128	0.501
902	gi|44968046	ribosomal protein L18 [Gallus gallus]	788	23020	29	25	8	7	39.8	11.84	3.47	Quantitation summary for protein	129/126	0.934	27	1.094	*	130/126	0.65	27	[1.153]		131/126	0.886	27	1.101	*	129/127	1.103	27	1.068	*	130/127	0.752	27	1.081	*	131/127	1.057	27	[1.057]		129/128	0.564	27	[1.140]		130/128	0.384
903	gi|60098711	hypothetical protein RCJMB04_6m11 [Gallus gallus]	788	87231	38	34	12	12	22.7	6.15	0.74	Quantitation summary for protein	129/126	0.551	4	1.061	*	130/126	0.218	4	1.097	*	131/126	0.416	4	1.086	*	129/127	1.935	4	1.039	*	130/127	0.75	4	1.023	*	131/127	1.475	4	1.057	*	129/128	4.275	4	1.045	*	130/128	1.656
904	gi|53130334	hypothetical protein RCJMB04_7b13 [Gallus gallus]	787	96797	46	38	15	13	19.1	5.92	0.82	Quantitation summary for protein	129/126	0.968	32	1.073	*	130/126	1.084	32	1.137	*	131/126	1.047	32	1.088	*	129/127	0.769	32	[1.084]		130/127	0.845	32	[1.051]		131/127	0.841	32	1.072	*	129/128	0.322	33	[1.162]		130/128	0.353
905	gi|363727887	PREDICTED: SH3 domain-binding protein 1 [Gallus gallus]	787	79893	29	26	10	9	18.7	5.85	0.76	Quantitation summary for protein	129/126	1.082	28	1.083	*	130/126	1.291	28	1.121	*	131/126	1.402	28	[1.113]		129/127	0.509	28	[1.073]		130/127	0.595	28	1.069	*	131/127	0.666	28	1.058	*	129/128	0.414	27	1.091	*	130/128	0.488
906	gi|255760030	selenide, water dikinase 1 [Gallus gallus]	786	47762	27	25	7	6	24.2	5.64	0.95	Quantitation summary for protein	129/126	1.19	26	1.1	*	130/126	1.362	26	[1.179]		131/126	1.128	26	1.1	*	129/127	0.94	25	1.079	*	130/127	1.055	25	1.059	*	131/127	0.9	25	1.063	*	129/128	0.908	26	[1.141]		130/128	1.017
907	gi|363731790	PREDICTED: leucine-rich PPR motif-containing protein, mitochondrial [Gallus gallus]	785	180560	37	31	24	21	17.1	6.68	0.56	Quantitation summary for protein	129/126	1.143	33	1.071	*	130/126	1.081	34	1.102	*	131/126	1.332	34	1.08	*	129/127	0.927	33	1.054	*	130/127	0.865	33	1.035	*	131/127	1.092	34	1.055	*	129/128	0.248	33	[1.126]		130/128	0.231
908	gi|60098525	hypothetical protein RCJMB04_3i16 [Gallus gallus]	784	119982	27	24	13	12	13.2	8.4	0.42	Quantitation summary for protein	129/126	0.794	26	1.089	*	130/126	0.916	26	1.127	*	131/126	0.893	26	1.094	*	129/127	0.727	26	[1.071]		130/127	0.821	26	1.051	*	131/127	0.825	26	1.06	*	129/128	0.312	26	1.118	*	130/128	0.359
909	gi|53130169	hypothetical protein RCJMB04_6i8 [Gallus gallus]	783	45641	33	25	13	10	34.5	6.03	1.48	Quantitation summary for protein	129/126	1.219	26	[1.111]		130/126	1.46	26	1.187	*	131/126	1.237	26	1.13	*	129/127	1.087	26	1.079	*	130/127	1.277	26	1.058	*	131/127	1.114	26	1.064	*	129/128	0.683	26	1.205	*	130/128	0.801
910	gi|363731606	PREDICTED: nidogen-1 [Gallus gallus]	782	147625	31	25	16	12	17.2	5.07	0.33	Quantitation summary for protein	129/126	0.901	24	1.046	*	130/126	1.127	25	[1.117]		131/126	0.983	25	[1.075]		129/127	0.747	25	[1.078]		130/127	0.913	25	1.05	*	131/127	0.82	25	1.06	*	129/128	1.061	24	[1.091]		130/128	1.324
911	gi|363742078	PREDICTED: AP2-associated protein kinase 1 [Gallus gallus]	782	127947	21	17	11	9	15	6.06	0.32	Quantitation summary for protein	129/126	0.918	19	1.052	*	130/126	0.814	19	[1.073]		131/126	0.807	18	1.054	*	129/127	1.217	18	1.069	*	130/127	1.072	19	1.082	*	131/127	1.13	19	1.078	*	129/128	1.076	19	1.049	*	130/128	0.89
912	gi|363745941	PREDICTED: prefoldin subunit 5-like [Gallus gallus]	781	21201	32	27	9	8	60.6	5.9	9.51	Quantitation summary for protein	129/126	0.969	31	[1.147]		130/126	0.815	31	[1.209]		131/126	0.886	31	[1.154]		129/127	1.155	31	1.076	*	130/127	0.952	31	[1.068]		131/127	1.06	30	1.038	*	129/128	2.359	30	1.193	*	130/128	1.94
913	gi|363741723	PREDICTED: uncharacterized protein LOC419143 [Gallus gallus]	781	24968	21	17	4	4	35.7	9.16	1.12	Quantitation summary for protein	129/126	1.303	19	1.122	*	130/126	1.049	20	[1.149]		131/126	1.012	20	[1.129]		129/127	1.241	20	1.066	*	130/127	1.102	20	1.08	*	131/127	1.094	20	[1.069]		129/128	2.276	20	[1.162]		130/128	2.019
914	gi|53136315	hypothetical protein RCJMB04_27j21 [Gallus gallus]	781	60504	36	30	18	15	39.8	5.23	2.04	Quantitation summary for protein	129/126	0.965	33	1.127		130/126	1.017	33	1.254		131/126	1.029	33	1.165		129/127	0.965	33	1.099	*	130/127	0.998	33	[1.090]		131/127	1.039	33	[1.086]		129/128	0.835	33	[1.236]		130/128	0.862
915	gi|293651608	cytoplasmic linker associated protein 2 [Gallus gallus]	780	185266	30	29	18	18	14.8	8.59	0.39	Quantitation summary for protein	129/126	0.837	24	1.113	*	130/126	0.889	24	1.208	*	131/126	1.014	24	1.135		129/127	1.144	24	1.13	*	130/127	1.192	24	1.098	*	131/127	1.399	24	[1.105]		129/128	0.592	24	1.164	*	130/128	0.616
916	gi|363805615	RecName: Full=Serine/threonine-protein kinase 10	780	136837	59	41	25	16	28.6	7.03	0.64	Quantitation summary for protein	129/126	1.239	46	[1.065]		130/126	1.193	46	[1.097]		131/126	1.203	46	[1.070]		129/127	1.151	46	[1.048]		130/127	1.087	46	1.058	*	131/127	1.129	46	1.034	*	129/128	0.831	46	[1.084]		130/128	0.784
917	gi|363735222	PREDICTED: LOW QUALITY PROTEIN: WD repeat- and FYVE domain-containing protein 4 [Gallus gallus]	780	400762	39	34	19	17	7	5.95	0.19	Quantitation summary for protein	129/126	0.934	36	[1.094]		130/126	0.916	36	1.098	*	131/126	0.975	36	[1.110]		129/127	0.75	37	1.073	*	130/127	0.724	37	[1.067]		131/127	0.793	37	[1.058]		129/128	0.24	37	1.15	*	130/128	0.231
918	gi|53130772	hypothetical protein RCJMB04_10a7 [Gallus gallus]	779	63849	23	21	7	5	20.7	5.07	0.35	Quantitation summary for protein	129/126	0.711	21	[1.167]		130/126	0.7	21	1.207	*	131/126	0.615	21	[1.181]		129/127	1.334	21	1.118	*	130/127	1.288	21	1.08	*	131/127	1.165	21	1.086	*	129/128	0.667	21	[1.220]		130/128	0.643
919	gi|118092660	PREDICTED: 40S ribosomal protein S24 isoform 4 [Gallus gallus]	779	20687	36	29	7	7	41.2	10.91	5.11	Quantitation summary for protein	129/126	1.042	32	1.048	*	130/126	0.877	32	[1.107]		131/126	1.093	32	1.051	*	129/127	1.214	30	1.034	*	130/127	1.01	30	1.033		131/127	1.292	32	[1.040]		129/128	1.745	32	1.104	*	130/128	1.438
920	gi|53130298	hypothetical protein RCJMB04_6n13 [Gallus gallus]	778	40885	29	25	9	8	28.5	5.75	1.97	Quantitation summary for protein	129/126	0.761	11	1.13	*	130/126	0.598	11	[1.320]		131/126	0.687	11	[1.199]		129/127	1.119	11	1.139	*	130/127	0.89	10	1.09	*	131/127	1.019	11	1.084		129/128	0.887	11	1.306		130/128	0.683
921	gi|704350	paxillin [Gallus gallus]	778	69676	30	26	7	6	19.7	6.11	0.38	Quantitation summary for protein	129/126	0.98	27	[1.060]		130/126	0.864	27	[1.090]		131/126	0.829	27	[1.083]		129/127	1.065	27	[1.036]		130/127	0.921	27	[1.045]		131/127	0.91	27	1.032	*	129/128	0.538	27	[1.057]		130/128	0.465
922	gi|87196326	vesicle-associated membrane protein 3 [Gallus gallus]	778	13800	15	15	5	5	39.4	9.25	3.71	Quantitation summary for protein	129/126	1.359	10	1.195	*	130/126	1.275	10	1.203	*	131/126	1.496	10	1.204	*	129/127	1.088	10	1.181		130/127	1.001	10	1.221		131/127	1.209	10	1.185	*	129/128	0.242	10	1.321	*	130/128	0.222
923	gi|306518680	SWI/SNF related, matrix associated, actin dependent regulator of chromatin, subfamily e, member 1 [Gallus gallus]	777	53874	24	22	10	9	26.5	4.86	1.3	Quantitation summary for protein	129/126	0.811	21	1.183	*	130/126	0.964	21	1.259		131/126	0.802	20	1.189	*	129/127	0.944	21	[1.147]		130/127	1.073	21	1.08	*	131/127	0.943	20	[1.127]		129/128	1.542	17	[1.309]		130/128	1.789
924	gi|50751398	PREDICTED: cAMP-dependent protein kinase catalytic subunit beta [Gallus gallus]	777	54263	25	23	9	9	30.2	8.55	1.03	Quantitation summary for protein	129/126	0.928	24	1.094	*	130/126	1.076	24	1.139	*	131/126	1.025	24	1.088		129/127	0.751	24	1.051	*	130/127	0.854	24	[1.050]		131/127	0.838	24	1.055	*	129/128	0.438	24	1.107	*	130/128	0.497
925	gi|363731688	PREDICTED: monofunctional C1-tetrahydrofolate synthase, mitochondrial [Gallus gallus]	777	114695	40	31	18	14	20	8.3	0.61	Quantitation summary for protein	129/126	1.239	34	1.084	*	130/126	1.338	34	1.094	*	131/126	1.243	34	1.091	*	129/127	0.807	34	[1.054]		130/127	0.855	34	1.042	*	131/127	0.818	34	[1.060]		129/128	0.668	34	1.053	*	130/128	0.707
926	gi|53131944	hypothetical protein RCJMB04_12g8 [Gallus gallus]	777	43984	46	40	16	12	38.8	7.66	1.96	Quantitation summary for protein	129/126	1.02	42	1.051	*	130/126	0.999	42	1.082		131/126	0.926	42	1.055	*	129/127	0.892	42	1.046	*	130/127	0.856	42	1.039	*	131/127	0.817	42	[1.041]		129/128	1.047	42	1.092	*	130/128	1.004
927	gi|152031574	RecName: Full=Collagen alpha-1(I) chain; AltName: Full=Alpha-1 type I collagen; Flags: Precursor	776	151988	27	25	5	4	4	5.47	0.11	Quantitation summary for protein	129/126	0.718	27	[1.120]		130/126	1.238	27	[1.064]		131/126	0.748	27	[1.086]		129/127	0.855	27	[1.110]		130/127	1.446	27	[1.042]		131/127	0.9	27	[1.075]		129/128	1.323	27	1.063	*	130/128	2.236
928	gi|53136664	hypothetical protein RCJMB04_32c9 [Gallus gallus]	774	76198	39	37	15	14	26.5	9.13	0.88	Quantitation summary for protein	129/126	0.818	36	1.113	*	130/126	0.752	37	1.206	*	131/126	0.709	37	[1.135]		129/127	1.267	36	1.076	*	130/127	1.145	37	1.058	*	131/127	1.111	37	1.061	*	129/128	1.203	36	[1.146]		130/128	1.084
929	gi|29837126	SMC1 protein cohesin subunit [Gallus gallus]	774	177942	44	31	28	21	24.6	8.07	0.6	Quantitation summary for protein	129/126	0.987	35	1.088		130/126	1.158	35	[1.173]		131/126	0.982	35	1.092		129/127	0.845	36	1.058	*	130/127	0.972	35	[1.074]		131/127	0.849	35	[1.072]		129/128	0.699	35	[1.124]		130/128	0.803
930	gi|50748430	PREDICTED: proteasome subunit alpha type-6 [Gallus gallus]	772	32206	41	33	9	9	36.2	6.13	2.95	Quantitation summary for protein	129/126	1.028	38	1.046	*	130/126	0.909	38	[1.073]		131/126	0.883	37	1.043	*	129/127	1.113	37	[1.052]		130/127	0.964	37	[1.056]		131/127	0.964	36	1.037	*	129/128	2.682	37	1.174	*	130/128	2.322
931	gi|53127734	hypothetical protein RCJMB04_3c21 [Gallus gallus]	772	39091	26	26	9	9	36.6	5.31	1.65	Quantitation summary for protein	129/126	0.631	7	1.517	*	130/126	0.614	7	[1.722]		131/126	0.542	7	1.489	*	129/127	1.05	7	1.05	*	130/127	1.003	7	1.199		131/127	0.911	7	1.043	*	129/128	0.873	7	1.108	*	130/128	0.833
932	gi|60099233	hypothetical protein RCJMB04_38b23 [Gallus gallus]	771	25470	30	26	8	7	30.7	8.11	2.89	Quantitation summary for protein	129/126	0.632	22	[1.121]		130/126	0.549	22	[1.161]		131/126	0.664	22	[1.126]		129/127	0.827	22	1.048	*	130/127	0.705	22	1.058	*	131/127	0.878	22	1.043	*	129/128	0.47	22	1.109	*	130/128	0.4
933	gi|1741933	immunoglobulin heavy chain [Gallus gallus]	771	14528	13	13	2	2	26.8	4.61	1.32	Quantitation summary for protein	129/126	---	0	---		130/126	---	0	---		131/126	---	0	---		129/127	---	0	---		130/127	---	0	---		131/127	---	0	---		129/128	---	0	---		130/128	---
934	gi|50749993	PREDICTED: glutaredoxin-3 [Gallus gallus]	770	43482	46	44	14	13	32.6	5.47	2.47	Quantitation summary for protein	129/126	0.856	44	[1.110]		130/126	0.766	44	[1.192]		131/126	0.806	44	[1.124]		129/127	1.094	44	[1.059]		130/127	0.959	44	[1.045]		131/127	1.023	43	1.043	*	129/128	0.883	44	1.114	*	130/128	0.774
935	gi|60098379	hypothetical protein RCJMB04_1d17 [Gallus gallus]	770	43590	27	22	11	8	40.3	5.61	1.23	Quantitation summary for protein	129/126	0.823	25	1.063	*	130/126	0.806	25	[1.102]		131/126	0.755	25	1.068	*	129/127	0.989	25	1.033		130/127	0.95	25	[1.052]		131/127	0.915	25	1.039	*	129/128	1.198	25	[1.075]		130/128	1.149
936	gi|212634	insulinoma protein (rig) [Gallus gallus]	770	20925	32	29	4	3	26.9	10.39	4.94	Quantitation summary for protein	129/126	1.058	31	1.077	*	130/126	0.772	31	1.074	*	131/126	0.979	31	1.083		129/127	1.261	29	1.068	*	130/127	0.901	29	1.073	*	131/127	1.176	29	1.074	*	129/128	2.409	29	1.106	*	130/128	1.722
937	gi|363741764	PREDICTED: mitochondrial import receptor subunit TOM34 [Gallus gallus]	768	38359	28	26	9	8	28.5	9.05	1.29	Quantitation summary for protein	129/126	1.043	26	1.061	*	130/126	0.935	26	1.089	*	131/126	1	26	1.059		129/127	0.933	26	1.051	*	130/127	0.821	26	1.041	*	131/127	0.903	26	1.052	*	129/128	0.618	26	[1.142]		130/128	0.543
938	gi|53130874	hypothetical protein RCJMB04_10l24 [Gallus gallus]	767	58266	33	32	15	15	37.8	5.86	1.54	Quantitation summary for protein	129/126	1.24	32	[1.158]		130/126	1.551	32	1.234	*	131/126	1.258	32	[1.168]		129/127	0.861	32	1.07	*	130/127	1.056	32	1.041	*	131/127	0.882	32	1.064	*	129/128	0.716	32	1.199	*	130/128	0.877
939	gi|53135033	hypothetical protein RCJMB04_24e8 [Gallus gallus]	766	48050	38	34	14	13	44.6	6.15	2.3	Quantitation summary for protein	129/126	0.772	36	[1.077]		130/126	0.91	36	1.163	*	131/126	0.827	36	[1.095]		129/127	0.846	36	1.058	*	130/127	0.977	36	1.049	*	131/127	0.915	36	1.04	*	129/128	0.747	36	1.126	*	130/128	0.862
940	gi|53128673	hypothetical protein RCJMB04_5b8 [Gallus gallus]	765	52953	32	30	9	9	29.1	5.87	1.06	Quantitation summary for protein	129/126	1.06	30	[1.105]		130/126	1.03	30	1.113		131/126	0.966	29	1.091	*	129/127	1.175	28	[1.064]		130/127	1.109	28	[1.053]		131/127	1.075	28	1.049	*	129/128	1.593	28	[1.111]		130/128	1.503
941	gi|53132882	hypothetical protein RCJMB04_14b8 [Gallus gallus]	765	69367	35	34	11	11	17.5	8.36	1	Quantitation summary for protein	129/126	0.962	34	1.099	*	130/126	0.925	34	1.182	*	131/126	0.833	34	[1.120]		129/127	1.131	34	1.07	*	130/127	1.066	34	[1.082]		131/127	0.989	34	1.038		129/128	1.33	34	1.123	*	130/128	1.252
942	gi|53131721	hypothetical protein RCJMB04_12b19 [Gallus gallus]	765	128316	27	25	14	13	15	6.45	0.46	Quantitation summary for protein	129/126	1.065	27	1.089	*	130/126	1.112	27	1.167	*	131/126	0.975	27	1.094		129/127	0.941	26	1.047	*	130/127	0.967	27	[1.062]		131/127	0.873	27	[1.046]		129/128	0.766	27	[1.126]		130/128	0.784
943	gi|53131457	hypothetical protein RCJMB04_11n1 [Gallus gallus]	764	48251	27	25	9	9	28.3	5.42	1.52	Quantitation summary for protein	129/126	0.872	27	1.108	*	130/126	0.999	26	[1.170]		131/126	0.845	27	1.118	*	129/127	1.062	24	1.065	*	130/127	1.178	25	[1.083]		131/127	1.068	25	[1.063]		129/128	0.624	23	[1.197]		130/128	0.678
944	gi|363727862	PREDICTED: SUN domain-containing protein 2-like [Gallus gallus]	763	83677	37	27	13	13	19.4	6.11	0.85	Quantitation summary for protein	129/126	1.201	31	[1.101]		130/126	1.423	31	[1.225]		131/126	1.19	31	[1.092]		129/127	0.928	31	[1.142]		130/127	1.077	31	[1.079]		131/127	0.928	31	[1.119]		129/128	0.616	31	[1.167]		130/128	0.715
945	gi|62992	transthyretin [Gallus gallus]	763	18189	27	22	7	5	45.3	5.11	2.9	Quantitation summary for protein	129/126	0.537	24	[1.102]		130/126	0.798	24	[1.131]		131/126	0.62	24	[1.104]		129/127	0.629	24	[1.053]		130/127	0.917	24	1.048	*	131/127	0.733	24	1.045	*	129/128	1.307	24	1.087	*	130/128	1.901
946	gi|118086455	PREDICTED: serine/threonine-protein kinase PRP4 homolog [Gallus gallus]	762	145500	35	32	17	14	13.1	10.26	0.52	Quantitation summary for protein	129/126	0.967	32	1.119		130/126	1.196	32	[1.238]		131/126	1.073	32	1.127	*	129/127	0.911	32	1.068	*	130/127	1.104	32	[1.084]		131/127	1.02	32	1.053	*	129/128	0.726	32	1.163	*	130/128	0.879
947	gi|363738248	PREDICTED: adenine phosphoribosyltransferase-like [Gallus gallus]	760	22143	33	25	12	10	70.9	5.78	10.05	Quantitation summary for protein	129/126	1.409	26	1.143	*	130/126	1.779	25	1.215	*	131/126	1.375	26	1.13	*	129/127	0.768	28	1.097	*	130/127	0.952	26	1.058	*	131/127	0.733	27	1.072	*	129/128	1.086	27	[1.241]		130/128	1.34
948	gi|50752156	PREDICTED: dnaJ homolog subfamily B member 11 [Gallus gallus]	759	46943	33	25	11	8	30.4	5.93	1.42	Quantitation summary for protein	129/126	1.374	29	1.126	*	130/126	1.141	29	1.221	*	131/126	1.315	29	1.138	*	129/127	1.595	29	[1.120]		130/127	1.299	29	1.095	*	131/127	1.541	29	[1.096]		129/128	2.152	28	[1.252]		130/128	1.755
949	gi|50761547	PREDICTED: phosphatidylinositol 3-kinase regulatory subunit alpha isoform 2 [Gallus gallus]	759	96522	26	25	14	14	22.8	5.73	0.7	Quantitation summary for protein	129/126	0.862	23	1.102	*	130/126	0.896	23	1.167	*	131/126	0.861	22	1.1	*	129/127	0.881	23	1.054	*	130/127	0.897	23	[1.071]		131/127	0.892	23	[1.055]		129/128	0.857	23	1.12	*	130/128	0.872
950	gi|53133852	hypothetical protein RCJMB04_20p3 [Gallus gallus]	757	30744	41	39	7	7	31.2	5.15	2.43	Quantitation summary for protein	129/126	0.975	38	[1.114]		130/126	0.911	38	[1.236]		131/126	0.914	38	[1.142]		129/127	1.107	39	[1.067]		130/127	1.019	39	[1.074]		131/127	1.05	39	[1.046]		129/128	1.163	39	[1.176]		130/128	1.07
951	gi|161513247	immunoglobulin heavy chain variable region [Gallus gallus]	755	14514	21	19	5	5	50	7.89	3.36	Quantitation summary for protein	129/126	1.592	6	1.231	*	130/126	0.995	6	1.313		131/126	1.758	6	1.545	*	129/127	1.716	6	1.179	*	130/127	1.052	6	1.137		131/127	1.914	6	1.151	*	129/128	1.873	6	1.126	*	130/128	1.148
952	gi|973977	calcium-binding protein [Gallus gallus]	754	23675	28	22	8	7	39.9	9.23	2.29	Quantitation summary for protein	129/126	1.061	23	[1.125]		130/126	1.132	23	1.159	*	131/126	0.801	23	1.108	*	129/127	1.153	23	[1.053]		130/127	1.206	23	1.055	*	131/127	0.879	23	1.052	*	129/128	0.769	24	1.14	*	130/128	0.804
953	gi|118129631	PREDICTED: LIM domain and actin-binding protein 1 [Gallus gallus]	753	102253	46	32	23	17	36.5	5.77	1.06	Quantitation summary for protein	129/126	0.699	38	1.077	*	130/126	0.897	38	[1.115]		131/126	0.761	38	[1.085]		129/127	0.856	38	[1.049]		130/127	1.078	38	[1.050]		131/127	0.942	38	1.04	*	129/128	0.827	38	1.084	*	130/128	1.06
954	gi|53127342	hypothetical protein RCJMB04_1o9 [Gallus gallus]	753	58922	40	34	11	11	31.1	6.66	0.92	Quantitation summary for protein	129/126	1.14	25	1.075	*	130/126	0.891	25	1.091	*	131/126	1.064	25	1.082	*	129/127	1.22	25	1.057	*	130/127	0.935	25	1.066	*	131/127	1.15	25	1.061	*	129/128	1.135	25	[1.136]		130/128	0.87
955	gi|363728070	PREDICTED: tetratricopeptide repeat protein 38-like [Gallus gallus]	751	59337	36	32	12	12	29.4	5.84	1.5	Quantitation summary for protein	129/126	0.97	13	1.126		130/126	0.916	13	1.159		131/126	0.866	13	1.113	*	129/127	0.938	13	1.097	*	130/127	0.877	12	1.066	*	131/127	0.846	13	1.063	*	129/128	0.417	13	[1.307]		130/128	0.386
956	gi|33340029	collapsin response mediator protein-4A, partial [Gallus gallus]	751	27308	34	27	11	9	67.4	5.16	4.63	Quantitation summary for protein	129/126	0.775	9	[1.110]		130/126	0.713	9	1.128	*	131/126	0.596	9	[1.112]		129/127	1.292	9	1.108	*	130/127	1.166	9	1.07	*	131/127	1.004	9	1.09		129/128	1.394	9	1.104	*	130/128	1.257
957	gi|308818184	acetyl-Coenzyme A acyltransferase 1 (peroxisomal 3-oxoacyl-Coenzyme A thiolase) [Gallus gallus]	750	50134	33	28	11	11	35.6	9.26	1.29	Quantitation summary for protein	129/126	0.757	28	1.049	*	130/126	0.703	28	[1.098]		131/126	0.746	28	1.051	*	129/127	0.95	28	[1.042]		130/127	0.865	28	1.043	*	131/127	0.946	28	[1.050]		129/128	1.166	27	1.075	*	130/128	1.064
958	gi|53130318	hypothetical protein RCJMB04_6o19 [Gallus gallus]	750	58460	28	25	12	10	25.8	5.53	1.15	Quantitation summary for protein	129/126	1.098	28	1.078	*	130/126	1.219	28	1.114	*	131/126	1.108	28	1.079	*	129/127	0.974	28	1.032	*	130/127	1.06	28	1.038	*	131/127	0.992	28	1.031		129/128	0.418	28	[1.140]		130/128	0.455
959	gi|53130538	hypothetical protein RCJMB04_8j15 [Gallus gallus]	749	92024	30	25	14	13	23.7	9.22	0.75	Quantitation summary for protein	129/126	1.05	28	1.112	*	130/126	1.102	28	1.234	*	131/126	1.15	28	1.134	*	129/127	0.923	28	[1.110]		130/127	0.95	28	1.061	*	131/127	1.02	28	[1.089]		129/128	0.475	28	1.326	*	130/128	0.489
960	gi|114378	RecName: Full=Sodium/potassium-transporting ATPase subunit alpha-2; Short=Na(+)/K(+) ATPase alpha-2 subunit; AltName: Full=Sodium pump subunit alpha-2	748	125207	30	24	11	10	13.9	5.43	0.43	Quantitation summary for protein	129/126	0.869	3	1.057	*	130/126	1.881	3	1.709		131/126	0.954	3	1.118		129/127	0.859	3	1.162		130/127	1.824	3	1.417		131/127	0.953	3	1.155		129/128	0.393	3	1.471		130/128	0.834
961	gi|60098639	hypothetical protein RCJMB04_4d23 [Gallus gallus]	747	54720	34	27	13	12	35.5	5.83	1.27	Quantitation summary for protein	129/126	1.092	28	1.061	*	130/126	1.229	28	1.105	*	131/126	1.226	28	1.068	*	129/127	0.973	28	[1.057]		130/127	1.073	28	1.046	*	131/127	1.111	27	1.033	*	129/128	1.132	28	1.104	*	130/128	1.248
962	gi|63807	chicken transferrin receptor [Gallus gallus]	747	96160	29	28	9	9	13.8	5.88	0.4	Quantitation summary for protein	129/126	1.186	28	1.114	*	130/126	1.027	28	1.175		131/126	1.084	28	1.118	*	129/127	1.295	28	[1.064]		130/127	1.099	28	1.053	*	131/127	1.195	28	1.061	*	129/128	0.868	28	[1.058]		130/128	0.737
963	gi|5705960	immunoglobulin alpha heavy chain [Gallus gallus]	745	65988	33	30	11	11	18.1	4.58	0.88	Quantitation summary for protein	129/126	1.111	17	1.148	*	130/126	0.777	17	1.296	*	131/126	1.205	17	[1.168]		129/127	1.733	17	[1.139]		130/127	1.189	17	1.107	*	131/127	1.9	17	1.137	*	129/128	1.383	17	[1.188]		130/128	0.947
964	gi|53136536	hypothetical protein RCJMB04_30g17 [Gallus gallus]	745	64007	35	28	9	8	18.1	6.09	1.12	Quantitation summary for protein	129/126	0.946	28	1.181		130/126	0.991	28	[1.252]		131/126	1.033	27	1.199		129/127	0.876	28	[1.072]		130/127	0.9	28	[1.100]		131/127	0.966	27	1.057	*	129/128	1.336	28	1.139	*	130/128	1.371
965	gi|50752381	PREDICTED: alpha-2-HS-glycoprotein [Gallus gallus]	745	41298	26	22	6	6	25.3	5.77	0.85	Quantitation summary for protein	129/126	0.596	26	[1.140]		130/126	0.764	26	[1.190]		131/126	0.63	26	[1.149]		129/127	0.65	26	1.061	*	130/127	0.817	26	1.038	*	131/127	0.693	26	1.048	*	129/128	1.117	26	1.078	*	130/128	1.404
966	gi|53136516	hypothetical protein RCJMB04_30d2 [Gallus gallus]	744	26135	21	21	3	3	13.3	9.68	0.62	Quantitation summary for protein	129/126	0.729	21	[1.223]		130/126	0.513	21	[1.501]		131/126	0.726	21	[1.256]		129/127	1.387	21	[1.143]		130/127	0.957	21	[1.151]		131/127	1.395	21	[1.115]		129/128	1.734	21	[1.226]		130/128	1.195
967	gi|161513255	immunoglobulin heavy chain variable region [Gallus gallus]	743	15525	22	18	4	4	32	9.39	2.99	Quantitation summary for protein	129/126	0.293	2	1.101	*	130/126	0.143	2	1.038	*	131/126	0.607	2	1.031	*	129/127	1.661	2	1.052	*	130/127	0.793	2	1.087		131/127	3.477	2	1.079	*	129/128	2.364	2	1.069	*	130/128	1.128
968	gi|60099069	hypothetical protein RCJMB04_22i13 [Gallus gallus]	742	59073	34	25	14	12	37.4	6.92	1.14	Quantitation summary for protein	129/126	0.971	28	1.083		130/126	1.094	28	1.145	*	131/126	0.939	28	1.089	*	129/127	0.905	28	1.032	*	130/127	1	28	1.061		131/127	0.883	27	1.024	*	129/128	0.728	28	1.119	*	130/128	0.803
969	gi|50759473	PREDICTED: peptidyl-prolyl cis-trans isomerase H isoform 2 [Gallus gallus]	740	22686	35	31	8	8	46.3	8.27	4.24	Quantitation summary for protein	129/126	0.924	30	1.07	*	130/126	1.009	30	[1.129]		131/126	0.918	30	1.072	*	129/127	0.893	30	1.041	*	130/127	0.956	30	1.044	*	131/127	0.895	30	1.038	*	129/128	1.256	30	1.135	*	130/128	1.292
970	gi|300295	puromycin-sensitive aminopeptidase isozyme II, PSA-II {peptide SII-11} {EC 3.4.11.-} [chickens, brain, Peptide Partial, 19 aa]	740	2583	14	10	2	1	100	3.8	40.02	Quantitation summary for protein	129/126	1.275	14	1.133	*	130/126	2.968	14	1.28	*	131/126	1.5	14	[1.183]		129/127	0.517	14	1.106	*	130/127	1.181	14	1.068	*	131/127	0.615	14	1.092	*	129/128	0.446	14	1.114	*	130/128	1.018
971	gi|62964	unnamed protein product [Gallus gallus]	739	39370	31	22	11	9	35.2	5.95	1.43	Quantitation summary for protein	129/126	1.552	24	[1.122]		130/126	1.225	24	[1.151]		131/126	1.311	24	[1.124]		129/127	1.213	24	1.055	*	130/127	0.939	24	[1.029]		131/127	1.034	24	1.04	*	129/128	1.478	24	[1.096]		130/128	1.176
972	gi|363739726	PREDICTED: enoyl-CoA delta isomerase 1, mitochondrial [Gallus gallus]	738	38653	27	24	10	10	35.4	9.3	1.47	Quantitation summary for protein	129/126	1.017	24	1.07		130/126	1.237	24	1.122	*	131/126	1.024	24	1.09		129/127	0.997	24	1.066		130/127	1.188	24	1.097	*	131/127	1.031	23	1.051	*	129/128	0.871	24	[1.150]		130/128	1.037
973	gi|4140289	high mobility group 1 protein [Gallus gallus]	738	35377	55	29	15	10	48.4	5.62	2.83	Quantitation summary for protein	129/126	0.683	34	1.059	*	130/126	0.717	35	[1.115]		131/126	0.641	34	1.065	*	129/127	1.019	35	1.04	*	130/127	1.071	35	1.043	*	131/127	0.963	35	1.045	*	129/128	0.871	35	[1.115]		130/128	0.915
974	gi|363741413	PREDICTED: RNA-binding protein 12-like [Gallus gallus]	737	102379	48	30	20	15	25	8.73	0.82	Quantitation summary for protein	129/126	1.177	37	1.08	*	130/126	1.235	37	1.127	*	131/126	1.083	37	1.08	*	129/127	0.999	38	[1.050]		130/127	1.027	38	1.046	*	131/127	0.927	38	1.043	*	129/128	0.933	38	1.117	*	130/128	0.958
975	gi|50729879	PREDICTED: ATP synthase-coupling factor 6, mitochondrial isoform 2 [Gallus gallus]	735	14873	36	27	10	8	54.2	8.96	10.83	Quantitation summary for protein	129/126	1.068	31	1.141	*	130/126	1.389	30	[1.424]		131/126	1.093	31	[1.165]		129/127	0.921	31	[1.123]		130/127	1.135	30	[1.144]		131/127	0.952	31	[1.089]		129/128	1.355	30	1.338	*	130/128	1.696
976	gi|363729502	PREDICTED: S-formylglutathione hydrolase isoform 1 [Gallus gallus]	734	37037	23	21	7	6	27	6.3	1.56	Quantitation summary for protein	129/126	1.003	23	[1.113]		130/126	1.291	23	[1.225]		131/126	0.891	23	[1.123]		129/127	0.893	23	1.076	*	130/127	1.127	23	1.089	*	131/127	0.801	23	1.053	*	129/128	0.772	23	[1.155]		130/128	0.974
977	gi|50746905	PREDICTED: 3-hydroxybutyrate dehydrogenase type 2 [Gallus gallus]	733	31085	35	30	12	12	40.4	6.84	3.59	Quantitation summary for protein	129/126	1.053	30	1.127	*	130/126	1.16	30	[1.202]		131/126	0.946	30	1.133	*	129/127	0.767	30	[1.065]		130/127	0.828	30	[1.077]		131/127	0.695	30	1.069	*	129/128	1.543	30	1.191	*	130/128	1.666
978	gi|755484	cell division cycle control protein 37 [Gallus gallus]	733	35532	38	35	9	8	36.2	5.65	1.67	Quantitation summary for protein	129/126	1.155	5	1.042	*	130/126	1.116	5	1.109		131/126	1.062	5	1.073		129/127	1.219	5	1.086	*	130/127	1.156	5	1.012	*	131/127	1.132	5	1.084	*	129/128	0.667	5	1.076	*	130/128	0.632
979	gi|118090738	PREDICTED: epididymis-specific alpha-mannosidase [Gallus gallus]	733	130430	21	19	9	8	9.3	8.46	0.25	Quantitation summary for protein	129/126	0.908	19	1.099	*	130/126	1	19	[1.217]		131/126	0.913	19	1.116	*	129/127	1.055	19	1.067	*	130/127	1.138	19	[1.120]		131/127	1.071	19	1.061	*	129/128	1.332	19	1.093	*	130/128	1.436
980	gi|118093904	PREDICTED: glycerol-3-phosphate dehydrogenase, mitochondrial [Gallus gallus]	732	92157	30	26	16	14	23.8	7.58	0.81	Quantitation summary for protein	129/126	0.842	29	1.085	*	130/126	0.872	28	1.136	*	131/126	0.813	29	1.075	*	129/127	0.845	29	1.064	*	130/127	0.855	29	[1.068]		131/127	0.824	29	[1.081]		129/128	0.929	29	1.201	*	130/128	0.939
981	gi|363737486	PREDICTED: cytochrome c oxidase subunit 5A, mitochondrial isoform 2 [Gallus gallus]	731	17841	35	29	7	7	39.9	6.3	6.98	Quantitation summary for protein	129/126	0.8	30	1.053	*	130/126	0.744	30	[1.116]		131/126	0.775	30	1.068	*	129/127	1.026	30	1.047	*	130/127	0.935	30	1.07	*	131/127	1.004	30	1.055		129/128	1.674	30	[1.177]		130/128	1.525
982	gi|53132189	hypothetical protein RCJMB04_12p24 [Gallus gallus]	731	105008	28	22	16	13	25.1	6.34	0.58	Quantitation summary for protein	129/126	1.08	25	1.091	*	130/126	1.141	24	1.112	*	131/126	1.104	24	1.089	*	129/127	1.006	24	1.065		130/127	1.001	25	1.093		131/127	1.049	24	1.061	*	129/128	0.567	25	[1.150]		130/128	0.594
983	gi|60098375	hypothetical protein RCJMB04_1d4 [Gallus gallus]	730	55281	37	26	14	9	35.4	9.95	1.25	Quantitation summary for protein	129/126	0.731	34	1.104	*	130/126	0.695	34	1.181	*	131/126	0.721	34	1.101	*	129/127	1.235	34	1.069	*	130/127	1.151	34	1.077	*	131/127	1.229	34	1.065	*	129/128	1.583	33	1.106	*	130/128	1.509
984	gi|313661353	rho-associated protein kinase 1 [Gallus gallus]	730	191625	42	36	19	17	14.1	5.66	0.36	Quantitation summary for protein	129/126	1.105	36	1.046	*	130/126	1.005	36	1.058		131/126	1.074	36	1.046	*	129/127	0.789	36	1.046	*	130/127	0.704	36	1.043	*	131/127	0.775	36	1.043	*	129/128	0.542	36	1.087	*	130/128	0.483
985	gi|53133322	hypothetical protein RCJMB04_15h2 [Gallus gallus]	729	53612	24	19	10	9	26.7	6.9	1.3	Quantitation summary for protein	129/126	1.081	23	1.131	*	130/126	1.025	23	[1.354]		131/126	1.04	23	1.167		129/127	1.3	23	1.119	*	130/127	1.208	23	[1.118]		131/127	1.262	23	1.114	*	129/128	1.319	21	[1.245]		130/128	1.24
986	gi|118090272	PREDICTED: G-rich sequence factor 1 [Gallus gallus]	728	50722	32	26	12	10	39	6.55	1.13	Quantitation summary for protein	129/126	0.955	26	[1.095]		130/126	0.936	26	[1.201]		131/126	1.013	26	[1.129]		129/127	1.185	26	[1.069]		130/127	1.139	26	1.066	*	131/127	1.269	26	[1.048]		129/128	1.489	26	[1.061]		130/128	1.429
987	gi|63333	unnamed protein product [Gallus gallus]	725	88833	32	25	18	15	29.8	4.88	0.99	Quantitation summary for protein	129/126	1.01	2	1.038		130/126	0.93	2	1.093		131/126	1.069	2	1.099		129/127	0.917	2	1.382		130/127	0.828	2	1.454		131/127	0.98	2	1.21		129/128	0.592	2	1.789		130/128	0.534
988	gi|118085600	PREDICTED: WD repeat-containing protein 37 [Gallus gallus]	724	61046	25	25	10	10	20	6.79	0.69	Quantitation summary for protein	129/126	0.865	25	1.083	*	130/126	0.941	25	[1.139]		131/126	0.856	25	[1.071]		129/127	0.902	24	1.052	*	130/127	0.965	24	1.047	*	131/127	0.904	24	1.049	*	129/128	0.81	24	1.081	*	130/128	0.936
989	gi|240849463	acyl-protein thioesterase 2 [Gallus gallus]	724	28876	32	27	10	9	39.7	7.08	3.61	Quantitation summary for protein	129/126	0.996	28	[1.103]		130/126	1.019	28	1.196		131/126	0.994	28	[1.109]		129/127	0.98	28	1.063		130/127	0.984	28	1.071		131/127	0.988	28	1.06		129/128	0.867	28	1.214	*	130/128	0.869
990	gi|53133287	hypothetical protein RCJMB04_15c3 [Gallus gallus]	723	28539	27	24	12	10	50.7	8.86	5.53	Quantitation summary for protein	129/126	1.138	26	1.11	*	130/126	1.066	26	[1.229]		131/126	1.247	26	1.112	*	129/127	1.053	25	1.062	*	130/127	0.97	26	[1.096]		131/127	1.169	26	1.063	*	129/128	0.443	26	[1.163]		130/128	0.407
991	gi|53127640	hypothetical protein RCJMB04_2m19 [Gallus gallus]	723	32451	28	22	9	9	51	8.54	2.92	Quantitation summary for protein	129/126	1.094	21	1.126	*	130/126	1.589	20	1.221	*	131/126	0.975	21	1.158		129/127	0.809	21	1.093	*	130/127	1.046	20	1.067	*	131/127	0.728	21	[1.073]		129/128	0.946	21	1.194		130/128	1.192
992	gi|54114952	TPA_inf: HN1-like protein [Gallus gallus]	723	25070	20	17	6	4	37.8	9.12	1.12	Quantitation summary for protein	129/126	1.012	18	[1.073]		130/126	0.866	18	1.068	*	131/126	1.014	18	[1.137]		129/127	1.742	18	1.112	*	130/127	1.461	18	1.083	*	131/127	1.762	18	[1.091]		129/128	1.714	18	[1.146]		130/128	1.305
993	gi|363738482	PREDICTED: inter-alpha-trypsin inhibitor heavy chain H3 [Gallus gallus]	721	116604	31	26	11	9	14.2	5.85	0.43	Quantitation summary for protein	129/126	1.003	26	1.239		130/126	1.125	25	1.194	*	131/126	0.942	26	1.265		129/127	0.859	26	[1.150]		130/127	0.945	25	1.104	*	131/127	0.814	26	[1.191]		129/128	1.924	26	1.152	*	130/128	2.119
994	gi|307078119	splicing factor, arginine/serine-rich 3 [Gallus gallus]	720	20921	54	38	12	10	48.2	11.64	13.68	Quantitation summary for protein	129/126	0.826	39	[1.090]		130/126	0.861	39	[1.170]		131/126	0.767	39	[1.105]		129/127	1.011	39	1.066		130/127	1.034	39	1.046	*	131/127	0.948	39	1.049	*	129/128	1.458	39	1.25	*	130/128	1.49
995	gi|53127406	hypothetical protein RCJMB04_2d1 [Gallus gallus]	718	59929	30	26	10	9	24.4	6.17	1	Quantitation summary for protein	129/126	1.372	27	1.09	*	130/126	1.317	28	1.192	*	131/126	1.05	28	1.126	*	129/127	1.035	28	1.077	*	130/127	1.148	28	[1.046]		131/127	0.943	28	[1.049]		129/128	1.06	28	1.133	*	130/128	1.174
996	gi|53133792	hypothetical protein RCJMB04_20f2 [Gallus gallus]	718	78820	35	27	15	12	26.7	7.94	0.92	Quantitation summary for protein	129/126	1.077	31	1.052	*	130/126	1.225	31	[1.082]		131/126	1.339	30	1.05	*	129/127	0.84	31	1.041	*	130/127	0.937	31	[1.037]		131/127	1.013	31	1.035		129/128	0.463	31	1.129	*	130/128	0.516
997	gi|363728772	PREDICTED: pyridoxal kinase [Gallus gallus]	717	40435	31	23	9	7	24.2	5.93	2.25	Quantitation summary for protein	129/126	0.916	28	[1.112]		130/126	0.739	28	1.174	*	131/126	0.705	28	1.119	*	129/127	1.25	28	1.091	*	130/127	0.988	28	[1.093]		131/127	0.971	28	[1.091]		129/128	2.603	28	[1.230]		130/128	2.056
998	gi|363733166	PREDICTED: bifunctional 3~-phosphoadenosine 5~-phosphosulfate synthase 1 [Gallus gallus]	716	80267	41	32	15	12	28	6.29	0.75	Quantitation summary for protein	129/126	1.297	32	1.084	*	130/126	1.147	32	1.11	*	131/126	1.229	32	1.091	*	129/127	1.303	32	1.061	*	130/127	1.129	32	[1.035]		131/127	1.246	32	1.05	*	129/128	1.037	32	1.095	*	130/128	0.898
999	gi|53133602	hypothetical protein RCJMB04_18g17 [Gallus gallus]	715	21347	26	20	8	7	31	5.95	7.97	Quantitation summary for protein	129/126	0.934	20	[1.191]		130/126	0.922	20	[1.324]		131/126	0.851	20	[1.201]		129/127	1.168	20	1.102	*	130/127	1.131	20	[1.085]		131/127	1.075	20	1.098	*	129/128	1.202	20	[1.403]		130/128	1.162
1000	gi|53129492	hypothetical protein RCJMB04_5m6 [Gallus gallus]	715	82374	24	20	10	9	19.3	4.6	0.42	Quantitation summary for protein	129/126	0.891	20	1.1	*	130/126	1.25	20	1.229	*	131/126	0.965	20	1.101		129/127	0.891	21	1.086	*	130/127	1.229	21	1.078	*	131/127	0.973	21	1.078		129/128	0.694	21	1.217	*	130/128	0.956
1001	gi|363730693	PREDICTED: LOW QUALITY PROTEIN: erythrocyte membrane protein band 4.1-like 3 [Gallus gallus]	711	142272	30	26	9	9	9.9	5.37	0.28	Quantitation summary for protein	129/126	0.964	23	[1.096]		130/126	1.066	23	1.165		131/126	0.93	23	[1.149]		129/127	1.053	23	1.081	*	130/127	1.142	23	1.043	*	131/127	1.026	23	1.036	*	129/128	1.047	23	1.079	*	130/128	1.134
1002	gi|53135677	hypothetical protein RCJMB04_25k20 [Gallus gallus]	709	80184	30	27	16	13	22.1	6.24	0.75	Quantitation summary for protein	129/126	---	1	---		130/126	---	1	---		131/126	---	1	---		129/127	---	1	---		130/127	---	1	---		131/127	---	1	---		129/128	---	1	---		130/128	---
1003	gi|53133806	hypothetical protein RCJMB04_20i16 [Gallus gallus]	709	76391	33	25	17	16	32.8	5.99	0.96	Quantitation summary for protein	129/126	1.167	25	1.084	*	130/126	1.056	25	1.109	*	131/126	1.074	25	1.091	*	129/127	1.01	25	1.079		130/127	0.897	25	1.037	*	131/127	0.939	25	1.052	*	129/128	0.763	25	[1.129]		130/128	0.677
1004	gi|4927267	pleckstrin [Gallus gallus]	708	48406	19	16	9	7	30	8.67	0.69	Quantitation summary for protein	129/126	1.357	17	1.134	*	130/126	1.555	17	1.233	*	131/126	1.18	17	1.124	*	129/127	0.872	17	1.091	*	130/127	0.98	17	1.039	*	131/127	0.765	17	1.089	*	129/128	0.521	17	[1.244]		130/128	0.585
1005	gi|118102025	PREDICTED: dihydrolipoyllysine-residue acetyltransferase component of pyruvate dehydrogenase complex, mitochondrial [Gallus gallus]	704	81269	50	34	16	15	24.2	8.84	0.88	Quantitation summary for protein	129/126	0.928	40	1.084	*	130/126	1.011	40	[1.183]		131/126	0.992	40	1.104		129/127	0.958	40	[1.062]		130/127	1.022	40	[1.064]		131/127	1.034	40	[1.052]		129/128	1.493	40	[1.098]		130/128	1.593
1006	gi|363744261	PREDICTED: transcription factor BTF3 [Gallus gallus]	702	21594	26	22	7	6	46.9	6.85	3.23	Quantitation summary for protein	129/126	1.136	22	1.211	*	130/126	0.841	21	1.321	*	131/126	1.147	21	[1.256]		129/127	1.828	21	1.141	*	130/127	1.318	21	1.079	*	131/127	1.851	21	1.141	*	129/128	2.452	21	1.258	*	130/128	1.766
1007	gi|363741138	PREDICTED: transcription elongation factor SPT6 [Gallus gallus]	702	228650	33	29	19	17	17.5	4.8	0.29	Quantitation summary for protein	129/126	0.954	29	[1.127]		130/126	0.833	29	[1.202]		131/126	0.775	29	[1.140]		129/127	1.035	29	1.076	*	130/127	0.885	29	1.063	*	131/127	0.849	29	1.052	*	129/128	0.688	28	1.123	*	130/128	0.588
1008	gi|363729424	PREDICTED: LOW QUALITY PROTEIN: methylosome subunit pICln [Gallus gallus]	701	27590	16	16	3	3	23.1	4.06	0.41	Quantitation summary for protein	129/126	0.847	16	[1.035]		130/126	0.786	16	[1.059]		131/126	0.79	16	[1.043]		129/127	1.201	16	1.026	*	130/127	1.093	16	[1.037]		131/127	1.14	15	1.028	*	129/128	1.76	15	[1.065]		130/128	1.555
1009	gi|60098357	hypothetical protein RCJMB04_1b12 [Gallus gallus]	699	27750	34	30	7	6	28.4	8.21	1.78	Quantitation summary for protein	129/126	1.281	23	1.088	*	130/126	1.476	23	[1.173]		131/126	1.433	23	1.126	*	129/127	0.853	23	1.068	*	130/127	0.964	23	1.05	*	131/127	0.963	23	1.033	*	129/128	0.324	23	1.204	*	130/128	0.366
1010	gi|118085420	PREDICTED: GTPase IMAP family member 7-like [Gallus gallus]	699	29621	28	20	11	9	47.3	7.7	3.44	Quantitation summary for protein	129/126	0.933	18	1.083	*	130/126	0.964	18	1.145		131/126	1.056	18	1.105	*	129/127	0.908	18	1.077	*	130/127	0.954	17	1.07	*	131/127	1.038	18	1.064	*	129/128	0.333	18	1.181	*	130/128	0.337
1011	gi|1536812	immunoglobulin heavy chain variable region [Gallus gallus]	699	12292	17	14	3	2	38.5	5.13	1.67	Quantitation summary for protein	129/126	---	0	---		130/126	---	0	---		131/126	---	0	---		129/127	---	0	---		130/127	---	0	---		131/127	---	0	---		129/128	---	0	---		130/128	---
1012	gi|53127506	hypothetical protein RCJMB04_2k24 [Gallus gallus]	699	57086	30	27	13	13	36.1	5.76	1.59	Quantitation summary for protein	129/126	0.916	18	[1.097]		130/126	1.007	18	[1.123]		131/126	0.961	18	[1.102]		129/127	0.914	18	[1.070]		130/127	0.985	18	1.044		131/127	0.966	17	1.043	*	129/128	0.825	18	1.061	*	130/128	0.887
1013	gi|313760582	N-acetylglucosamine-6-sulfatase precursor [Gallus gallus]	698	67698	26	22	13	12	28.4	7.17	1.13	Quantitation summary for protein	129/126	0.831	25	1.108	*	130/126	0.881	25	[1.220]		131/126	0.887	25	1.128	*	129/127	0.84	25	1.093	*	130/127	0.873	25	[1.088]		131/127	0.906	25	1.074	*	129/128	1.851	25	1.164	*	130/128	1.921
1014	gi|363727496	PREDICTED: tyrosine-protein phosphatase non-receptor type 12 [Gallus gallus]	698	98743	23	17	6	5	10.5	5.38	0.22	Quantitation summary for protein	129/126	0.793	19	1.058	*	130/126	0.796	19	1.102	*	131/126	0.867	19	1.078	*	129/127	1.162	19	1.103	*	130/127	1.135	18	1.066	*	131/127	1.283	19	1.093	*	129/128	0.809	19	[1.081]		130/128	0.796
1015	gi|363734337	PREDICTED: selenoprotein H-like [Gallus gallus]	697	15005	22	21	4	4	30.4	10.09	1.78	Quantitation summary for protein	129/126	0.417	14	1.166	*	130/126	0.401	14	1.207	*	131/126	0.428	14	1.196	*	129/127	0.346	14	1.171	*	130/127	0.326	14	1.13	*	131/127	0.358	14	1.16	*	129/128	0.688	14	1.181	*	130/128	0.648
1016	gi|363730276	PREDICTED: leucine-rich repeat flightless-interacting protein 2 isoform 1 [Gallus gallus]	697	87641	32	27	13	11	20.3	6.19	0.67	Quantitation summary for protein	129/126	0.876	17	1.123	*	130/126	0.76	17	1.239	*	131/126	0.851	16	1.116	*	129/127	1.209	17	1.103	*	130/127	1.028	17	1.081		131/127	1.153	17	[1.106]		129/128	1.733	17	[1.173]		130/128	1.472
1017	gi|22090471	JC7 [Gallus gallus]	697	44034	24	23	7	7	24.7	5.16	0.66	Quantitation summary for protein	129/126	0.608	23	[1.134]		130/126	0.515	23	[1.310]		131/126	0.634	23	[1.157]		129/127	1.146	22	[1.149]		130/127	0.943	22	[1.246]		131/127	1.203	22	1.121	*	129/128	1.384	23	[1.136]		130/128	1.148
1018	gi|363739893	PREDICTED: golgin subfamily A member 3 [Gallus gallus]	697	199943	26	22	16	12	15.2	5.26	0.25	Quantitation summary for protein	129/126	0.87	22	[1.087]		130/126	0.907	22	1.123	*	131/126	0.93	21	1.077	*	129/127	1.15	20	1.041	*	130/127	1.126	22	[1.099]		131/127	1.196	22	1.049	*	129/128	0.719	22	[1.120]		130/128	0.731
1019	gi|118102540	PREDICTED: LEM domain-containing protein 2 [Gallus gallus]	697	87396	22	19	13	11	20.8	8.24	0.61	Quantitation summary for protein	129/126	0.809	19	1.111	*	130/126	0.866	19	1.165	*	131/126	0.923	19	1.115	*	129/127	0.754	21	[1.110]		130/127	0.794	22	1.069	*	131/127	0.867	22	[1.093]		129/128	0.677	21	1.124	*	130/128	0.714
1020	gi|161513275	immunoglobulin heavy chain variable region [Gallus gallus]	696	14078	22	18	4	4	33.1	5.71	3.55	Quantitation summary for protein	129/126	---	0	---		130/126	---	0	---		131/126	---	0	---		129/127	---	0	---		130/127	---	0	---		131/127	---	0	---		129/128	---	0	---		130/128	---
1021	gi|363739061	PREDICTED: dedicator of cytokinesis protein 2 [Gallus gallus]	696	247844	42	27	24	17	14.5	6.91	0.3	Quantitation summary for protein	129/126	0.952	30	1.074	*	130/126	1.036	30	[1.101]		131/126	1.12	30	1.087	*	129/127	0.682	30	1.056	*	130/127	0.728	30	1.053	*	131/127	0.81	30	1.048	*	129/128	0.294	30	1.117	*	130/128	0.314
1022	gi|1478490	acyl-coenzyme A binding protein, ACBP [chickens, Peptide, 86 aa]	696	12847	43	28	8	4	79.1	5.8	15.93	Quantitation summary for protein	129/126	1.965	9	[1.389]		130/126	1.782	9	[1.831]		131/126	1.593	9	[1.379]		129/127	1.122	8	1.073	*	130/127	1.027	9	[1.212]		131/127	0.945	9	[1.138]		129/128	2.198	9	1.136	*	130/128	1.952
1023	gi|53127340	hypothetical protein RCJMB04_1o7 [Gallus gallus]	696	25702	31	25	11	9	58.3	9.18	3.32	Quantitation summary for protein	129/126	1.067	25	1.106	*	130/126	0.968	25	1.166		131/126	0.988	25	1.112		129/127	0.931	25	1.09	*	130/127	0.828	25	[1.046]		131/127	0.871	25	1.068	*	129/128	1.559	24	1.068	*	130/128	1.396
1024	gi|2760608	CNP2 [Gallus gallus]	696	58090	42	31	19	15	35.5	9.15	1.85	Quantitation summary for protein	129/126	0.92	35	1.064	*	130/126	1.38	35	1.111	*	131/126	1.04	35	1.068	*	129/127	0.822	35	[1.040]		130/127	1.209	35	1.052	*	131/127	0.938	35	1.035	*	129/128	0.505	35	1.116	*	130/128	0.74
1025	gi|363731918	PREDICTED: angiotensinogen [Gallus gallus]	695	60581	25	23	11	10	31.9	5.41	1.1	Quantitation summary for protein	129/126	2.229	24	1.168	*	130/126	2.176	24	[1.264]		131/126	2.128	24	1.184	*	129/127	1.669	24	1.151	*	130/127	1.598	24	1.088	*	131/127	1.609	24	1.11	*	129/128	1.968	24	1.292	*	130/128	1.883
1026	gi|53130416	hypothetical protein RCJMB04_7j20 [Gallus gallus]	693	50830	28	26	13	11	35.1	8.65	1.57	Quantitation summary for protein	129/126	1.038	28	1.098	*	130/126	1.171	28	[1.198]		131/126	1.06	28	1.13	*	129/127	0.908	28	[1.069]		130/127	1.004	28	[1.092]		131/127	0.937	28	[1.068]		129/128	1.397	27	1.176	*	130/128	1.547
1027	gi|53135109	hypothetical protein RCJMB04_24h4 [Gallus gallus]	690	27192	21	20	6	6	43.3	8.31	1.83	Quantitation summary for protein	129/126	0.833	4	1.137		130/126	0.913	4	1.118		131/126	0.86	4	1.137		129/127	0.845	4	1.067	*	130/127	0.908	4	1.093		131/127	0.881	4	1.092		129/128	0.382	4	1.292	*	130/128	0.41
1028	gi|53127478	hypothetical protein RCJMB04_2i24 [Gallus gallus]	690	63261	27	23	17	15	34.9	5.84	1.37	Quantitation summary for protein	129/126	1.369	24	1.146	*	130/126	1.382	24	[1.307]		131/126	1.334	24	1.15	*	129/127	1.07	24	[1.101]		130/127	1.059	24	[1.077]		131/127	1.053	24	[1.084]		129/128	0.729	24	[1.219]		130/128	0.721
1029	gi|53127678	hypothetical protein RCJMB04_2o24 [Gallus gallus]	688	68003	40	26	17	13	34.8	6.11	1.69	Quantitation summary for protein	129/126	1.176	35	[1.145]		130/126	1.273	35	1.215	*	131/126	1.218	35	[1.180]		129/127	1.07	36	1.064	*	130/127	1.135	35	1.069	*	131/127	1.118	36	1.067	*	129/128	0.806	36	1.172	*	130/128	0.856
1030	gi|363729557	PREDICTED: stromal interaction molecule 1-like [Gallus gallus]	688	77146	31	27	17	13	28.2	6.59	0.79	Quantitation summary for protein	129/126	---	1	---		130/126	---	1	---		131/126	---	1	---		129/127	---	1	---		130/127	---	1	---		131/127	---	1	---		129/128	---	1	---		130/128	---
1031	gi|310750337	proteasome subunit alpha type-4 [Gallus gallus]	688	35722	27	25	14	13	53.6	6.92	3.52	Quantitation summary for protein	129/126	1.204	27	1.131	*	130/126	1.634	27	[1.273]		131/126	1.255	27	1.142	*	129/127	0.854	27	[1.109]		130/127	1.136	27	1.083	*	131/127	0.899	27	[1.094]		129/128	0.975	25	1.132		130/128	1.255
1032	gi|50736564	PREDICTED: mRNA cap guanine-N7 methyltransferase [Gallus gallus]	688	57592	29	24	12	11	28	5.45	0.95	Quantitation summary for protein	129/126	1.111	28	1.176	*	130/126	1.214	28	[1.313]		131/126	1.072	28	1.201		129/127	0.982	28	1.081		130/127	1.052	28	[1.063]		131/127	0.957	28	1.053	*	129/128	0.98	28	1.162		130/128	1.049
1033	gi|53127304	hypothetical protein RCJMB04_1l22 [Gallus gallus]	688	72713	22	21	7	7	14.1	7.64	0.49	Quantitation summary for protein	129/126	0.925	20	1.093	*	130/126	1.061	21	1.169		131/126	1.071	21	[1.125]		129/127	0.811	21	[1.069]		130/127	0.882	20	1.039	*	131/127	0.919	21	[1.056]		129/128	0.399	21	1.129	*	130/128	0.434
1034	gi|53134733	hypothetical protein RCJMB04_23k10 [Gallus gallus]	688	27804	33	31	12	11	60	8.59	5.14	Quantitation summary for protein	129/126	1.119	13	1.192	*	130/126	1.127	13	1.204	*	131/126	1.123	12	1.137	*	129/127	0.925	12	[1.099]		130/127	0.914	12	[1.088]		131/127	0.937	12	1.065	*	129/128	0.343	12	1.101	*	130/128	0.338
1035	gi|53127364	hypothetical protein RCJMB04_2a5 [Gallus gallus]	687	48881	25	20	11	9	31.8	7.12	1.34	Quantitation summary for protein	129/126	0.922	21	1.058	*	130/126	0.745	21	[1.100]		131/126	0.816	21	1.076	*	129/127	1.23	21	1.043	*	130/127	0.998	20	1.056		131/127	1.099	21	1.041	*	129/128	1.328	20	1.091	*	130/128	1.077
1036	gi|363740290	PREDICTED: delta-aminolevulinic acid dehydratase [Gallus gallus]	686	40282	29	26	15	13	41.7	7.08	2.27	Quantitation summary for protein	129/126	0.751	26	[1.147]		130/126	0.816	26	1.314	*	131/126	0.621	26	[1.168]		129/127	1.037	26	1.089	*	130/127	1.104	26	1.079	*	131/127	0.865	26	1.071	*	129/128	1.32	26	1.199	*	130/128	1.405
1037	gi|118083156	PREDICTED: beta-parvin [Gallus gallus]	686	49649	29	26	9	9	28.5	6.05	1.03	Quantitation summary for protein	129/126	0.955	26	1.064	*	130/126	0.884	26	1.108	*	131/126	0.769	26	[1.070]		129/127	1.119	26	[1.056]		130/127	1.016	26	1.04		131/127	0.909	26	[1.053]		129/128	1.167	25	1.098	*	130/128	1.06
1038	gi|363734430	PREDICTED: EH domain-containing protein 4-like [Gallus gallus]	686	64826	31	24	13	9	25.7	6.55	0.81	Quantitation summary for protein	129/126	0.952	24	[1.146]		130/126	0.929	24	1.169	*	131/126	1.032	24	1.158		129/127	0.745	24	1.095	*	130/127	0.712	25	[1.132]		131/127	0.816	25	1.098	*	129/128	0.628	25	[1.160]		130/128	0.6
1039	gi|363741053	PREDICTED: caspase-1 [Gallus gallus]	686	70943	34	32	9	9	19.5	9.9	0.5	Quantitation summary for protein	129/126	0.81	32	[1.058]		130/126	0.752	32	[1.147]		131/126	0.834	32	[1.069]		129/127	0.935	32	[1.052]		130/127	0.851	32	[1.056]		131/127	0.972	32	1.044	*	129/128	0.91	32	[1.099]		130/128	0.828
1040	gi|212589	p80/85 [Gallus gallus]	685	77211	29	24	13	10	26.6	5.33	0.58	Quantitation summary for protein	129/126	0.904	25	[1.154]		130/126	1.303	25	1.262	*	131/126	0.938	25	[1.160]		129/127	0.994	25	1.074		130/127	1.405	25	[1.076]		131/127	1.042	25	1.072	*	129/128	0.83	23	1.193	*	130/128	1.177
1041	gi|53129258	hypothetical protein RCJMB04_5j2 [Gallus gallus]	685	72115	22	14	7	5	14.1	9.07	0.31	Quantitation summary for protein	129/126	1.24	13	1.085	*	130/126	1.324	13	[1.219]		131/126	1.124	13	1.125	*	129/127	1.279	13	[1.207]		130/127	1.548	12	1.037	*	131/127	1.171	13	[1.133]		129/128	1.113	13	1.251		130/128	1.165
1042	gi|16904069	adipocyte fatty acid binding protein [Gallus gallus]	682	18436	20	19	7	6	40.2	6.34	4.37	Quantitation summary for protein	129/126	2.019	12	1.195	*	130/126	2.349	12	1.724	*	131/126	0.875	12	1.237		129/127	2.423	12	1.214	*	130/127	2.763	12	1.311	*	131/127	1.061	12	1.127		129/128	4.965	12	[1.498]		130/128	5.657
1043	gi|517098	phosphatase 2A catalytic subunit [Gallus gallus]	680	38631	23	23	8	8	34	5.22	1.47	Quantitation summary for protein	129/126	0.554	4	[2.037]		130/126	0.707	4	[2.465]		131/126	0.57	4	[1.934]		129/127	1.027	4	1.354		130/127	1.287	4	1.659		131/127	1.165	3	1.202		129/128	1.015	3	1.287		130/128	1.088
1044	gi|117428	RecName: Full=Argininosuccinate lyase; Short=ASAL; AltName: Full=Arginosuccinase; AltName: Full=Delta crystallin II; AltName: Full=Delta-2 crystallin	680	59090	35	28	17	14	32	5.88	1.8	Quantitation summary for protein	129/126	1.597	32	[1.227]		130/126	1.043	32	[1.348]		131/126	0.939	32	[1.232]		129/127	2.357	32	1.112	*	130/127	1.51	32	1.119	*	131/127	1.399	32	1.06	*	129/128	2.039	32	1.248	*	130/128	1.304
1045	gi|194722849	APEX nuclease [Gallus gallus]	680	36701	35	29	17	12	62.3	8.53	2.65	Quantitation summary for protein	129/126	0.976	29	1.051	*	130/126	1.086	30	1.133	*	131/126	0.967	30	1.082	*	129/127	0.986	30	[1.072]		130/127	1.06	30	[1.060]		131/127	0.972	30	1.044	*	129/128	0.66	29	[1.154]		130/128	0.71
1046	gi|53129777	hypothetical protein RCJMB04_6c13 [Gallus gallus]	679	25267	36	28	7	6	43.1	4.95	1.38	Quantitation summary for protein	129/126	0.711	30	[1.116]		130/126	0.407	30	[1.341]		131/126	0.501	30	1.205	*	129/127	1.915	28	1.138	*	130/127	1.067	28	[1.236]		131/127	1.361	28	1.117	*	129/128	3.331	30	[1.227]		130/128	1.869
1047	gi|53126839	hypothetical protein RCJMB04_1g23 [Gallus gallus]	678	63264	36	30	14	14	40.6	5.43	1.62	Quantitation summary for protein	129/126	0.857	32	[1.104]		130/126	0.724	32	1.144	*	131/126	0.739	32	1.107	*	129/127	1.294	31	[1.086]		130/127	1.073	31	1.056	*	131/127	1.126	31	[1.059]		129/128	1.41	32	1.165	*	130/128	1.167
1048	gi|53134513	hypothetical protein RCJMB04_23e18 [Gallus gallus]	678	29727	32	28	9	8	41	7.79	2.21	Quantitation summary for protein	129/126	1.071	28	[1.153]		130/126	0.962	28	[1.250]		131/126	1.005	28	[1.175]		129/127	0.957	28	[1.046]		130/127	0.843	28	1.084	*	131/127	0.907	28	1.039	*	129/128	1.829	28	1.144	*	130/128	1.611
1049	gi|363740811	PREDICTED: 26S proteasome non-ATPase regulatory subunit 12-like isoform 1 [Gallus gallus]	676	63056	34	25	16	14	30.7	6.28	1.14	Quantitation summary for protein	129/126	1.02	26	1.067		130/126	1.257	26	1.115	*	131/126	1.104	26	1.081	*	129/127	0.878	27	[1.039]		130/127	1.061	27	[1.038]		131/127	0.96	27	1.039	*	129/128	0.342	27	1.073	*	130/128	0.413
1050	gi|118103699	PREDICTED: ankycorbin [Gallus gallus]	676	135066	33	27	19	16	22.1	5.75	0.57	Quantitation summary for protein	129/126	0.992	29	1.09		130/126	1.605	29	[1.194]		131/126	1.293	29	1.119	*	129/127	0.805	30	[1.119]		130/127	1.262	29	1.069	*	131/127	1.061	30	1.095	*	129/128	0.648	30	1.164	*	130/128	1.035
1051	gi|53130690	hypothetical protein RCJMB04_9i5 [Gallus gallus]	676	23380	26	25	10	9	45	5.53	4.68	Quantitation summary for protein	129/126	1.779	15	1.194	*	130/126	2.766	15	1.294	*	131/126	2.124	15	1.222	*	129/127	0.928	15	1.066	*	130/127	1.414	15	1.095	*	131/127	1.118	15	1.068	*	129/128	0.172	15	[1.280]		130/128	0.253
1052	gi|363735368	PREDICTED: shootin-1 [Gallus gallus]	676	92377	23	22	10	9	18.3	5.97	0.37	Quantitation summary for protein	129/126	1.034	22	1.06	*	130/126	0.911	22	[1.087]		131/126	1.044	22	1.069	*	129/127	1.065	22	[1.058]		130/127	0.919	22	[1.045]		131/127	1.086	22	[1.051]		129/128	0.878	22	[1.130]		130/128	0.757
1053	gi|363728992	PREDICTED: carbohydrate kinase domain-containing protein [Gallus gallus]	676	64479	37	25	10	8	21.2	6.23	0.73	Quantitation summary for protein	129/126	1.079	32	1.061	*	130/126	1.066	32	1.099	*	131/126	0.945	32	1.071	*	129/127	0.989	32	[1.043]		130/127	0.958	32	1.036	*	131/127	0.875	32	[1.034]		129/128	1.326	32	1.065	*	130/128	1.283
1054	gi|118085706	PREDICTED: glycylpeptide N-tetradecanoyltransferase 2 [Gallus gallus]	675	67429	29	25	15	14	27.3	7.18	1.36	Quantitation summary for protein	129/126	1.326	17	1.126	*	130/126	1.455	17	1.238	*	131/126	1.373	17	1.158	*	129/127	0.94	16	1.081	*	130/127	1.038	17	1.115		131/127	0.989	16	1.084		129/128	0.705	16	1.202	*	130/128	0.789
1055	gi|60098723	hypothetical protein RCJMB04_7c2 [Gallus gallus]	675	90057	33	28	12	11	22.4	5.67	0.65	Quantitation summary for protein	129/126	0.861	30	1.063	*	130/126	0.887	30	1.097	*	131/126	0.848	30	[1.109]		129/127	1.236	30	[1.093]		130/127	1.248	30	[1.098]		131/127	1.228	30	1.052	*	129/128	0.716	29	1.078	*	130/128	0.737
1056	gi|355390334	delta-1-pyrroline-5-carboxylate dehydrogenase, mitochondrial [Gallus gallus]	674	68665	51	48	14	11	23.4	8.22	0.67	Quantitation summary for protein	129/126	0.761	48	[1.037]		130/126	0.659	48	[1.052]		131/126	0.703	48	[1.042]		129/127	0.94	48	[1.015]		130/127	0.798	48	1.02	*	131/127	0.876	48	1.015	*	129/128	1.166	48	[1.033]		130/128	0.989
1057	gi|63522	inhibitor of actin polymerization [Gallus gallus]	674	24694	30	26	9	9	75.1	5.77	5.74	Quantitation summary for protein	129/126	1.165	29	[1.124]		130/126	1.717	29	[1.203]		131/126	1.15	29	[1.146]		129/127	0.903	29	1.091	*	130/127	1.305	29	1.074	*	131/127	0.901	29	1.081	*	129/128	1.245	29	[1.181]		130/128	1.799
1058	gi|50760001	PREDICTED: scavenger mRNA-decapping enzyme DcpS [Gallus gallus]	674	40760	36	25	12	8	34.1	6.65	1.02	Quantitation summary for protein	129/126	1.134	27	1.05	*	130/126	1.427	27	[1.102]		131/126	1.088	27	1.055	*	129/127	1.116	27	1.047	*	130/127	1.377	27	1.062	*	131/127	1.081	27	1.048	*	129/128	0.768	27	[1.138]		130/128	0.946
1059	gi|363727776	PREDICTED: phospholipase B domain containing 1 [Gallus gallus]	670	74697	30	24	11	9	20.7	8.78	0.75	Quantitation summary for protein	129/126	0.881	26	[1.143]		130/126	0.799	26	[1.186]		131/126	1.119	26	[1.170]		129/127	0.654	25	1.071	*	130/127	0.582	26	1.076	*	131/127	0.84	26	1.057	*	129/128	1.568	26	[1.181]		130/128	1.412
1060	gi|4455121	osteoglycin [Gallus gallus]	669	37854	23	21	7	7	27.2	6.14	1.52	Quantitation summary for protein	129/126	0.823	20	[1.087]		130/126	1.12	20	[1.118]		131/126	0.886	20	1.079	*	129/127	0.708	20	1.038	*	130/127	0.944	21	[1.071]		131/127	0.769	21	1.05	*	129/128	1.166	19	1.093	*	130/128	1.555
1061	gi|53134047	hypothetical protein RCJMB04_22g9 [Gallus gallus]	669	50450	32	27	10	9	22.1	6.17	0.77	Quantitation summary for protein	129/126	0.937	3	1.086		130/126	1.589	3	1.061	*	131/126	1.081	3	1.075		129/127	0.804	3	1.096		130/127	1.337	3	1.025	*	131/127	0.937	3	1.015	*	129/128	0.768	3	1.218		130/128	1.277
1062	gi|363731453	PREDICTED: protein canopy homolog 3-like [Gallus gallus]	669	34994	27	19	10	6	32	5.62	1.47	Quantitation summary for protein	129/126	1.427	24	[1.224]		130/126	1.363	24	[1.478]		131/126	1.472	24	1.252	*	129/127	1.258	22	1.16	*	130/127	1.184	22	[1.177]		131/127	1.311	22	1.131	*	129/128	1.88	20	[1.292]		130/128	1.773
1063	gi|356991200	arfaptin-1 [Gallus gallus]	668	52331	31	24	13	10	37.6	5.58	1.35	Quantitation summary for protein	129/126	0.991	26	1.127		130/126	1.142	26	1.144	*	131/126	0.962	26	1.136		129/127	1.064	26	1.085	*	130/127	1.202	26	1.074	*	131/127	1.042	26	1.069	*	129/128	1.108	26	1.102	*	130/128	1.251
1064	gi|363727488	PREDICTED: laminin subunit beta-1 [Gallus gallus]	668	222223	26	24	14	13	9.1	4.84	0.24	Quantitation summary for protein	129/126	0.999	25	1.086		130/126	1.19	25	1.102	*	131/126	1.135	24	1.092	*	129/127	0.793	25	1.052	*	130/127	0.926	25	[1.054]		131/127	0.909	23	1.041	*	129/128	0.88	25	[1.112]		130/128	1.027
1065	gi|50758290	PREDICTED: uncharacterized protein LOC417605 isoform 2 [Gallus gallus]	666	15618	12	11	3	2	32.3	8.04	0.8	Quantitation summary for protein	129/126	1.355	11	1.141	*	130/126	2.176	11	1.132	*	131/126	1.442	11	[1.155]		129/127	0.943	11	1.043	*	130/127	1.485	11	1.061	*	131/127	1.014	11	[1.069]		129/128	1.518	11	1.099	*	130/128	2.194
1066	gi|363740399	PREDICTED: family with sequence similarity 129, member B [Gallus gallus]	666	112009	33	27	11	9	12.6	5.56	0.37	Quantitation summary for protein	129/126	0.926	29	1.049	*	130/126	1.1	29	1.047	*	131/126	1.15	29	1.056	*	129/127	0.837	29	1.038	*	130/127	0.975	29	1.022	*	131/127	1.018	28	1.028	*	129/128	0.466	29	1.12	*	130/128	0.542
1067	gi|53128235	hypothetical protein RCJMB04_4k14 [Gallus gallus]	665	96310	43	30	22	18	30.9	6.39	1.09	Quantitation summary for protein	129/126	1.46	27	1.121	*	130/126	1.42	27	1.153	*	131/126	1.53	27	1.125	*	129/127	0.995	27	1.073		130/127	0.949	27	1.045	*	131/127	1.053	27	1.058	*	129/128	0.632	28	[1.164]		130/128	0.602
1068	gi|118083604	PREDICTED: 60S ribosomal protein L24 [Gallus gallus]	665	24311	38	29	12	11	50.3	11.26	5.91	Quantitation summary for protein	129/126	0.708	32	[1.153]		130/126	0.5	32	[1.210]		131/126	0.648	32	[1.167]		129/127	1.148	32	1.055	*	130/127	0.795	32	1.052	*	131/127	1.06	32	1.04	*	129/128	1.041	32	1.096	*	130/128	0.72
1069	gi|118096568	PREDICTED: uncharacterized protein LOC415838 [Gallus gallus]	665	127144	30	21	12	9	13.7	8.98	0.36	Quantitation summary for protein	129/126	0.797	26	[1.071]		130/126	0.809	26	[1.100]		131/126	0.867	26	1.061	*	129/127	1.165	26	1.045	*	130/127	1.159	26	1.046	*	131/127	1.28	26	[1.049]		129/128	1.047	26	1.083	*	130/128	1.041
1070	gi|53132650	hypothetical protein RCJMB04_13l14 [Gallus gallus]	664	24531	27	22	12	9	64.3	5.05	2.59	Quantitation summary for protein	129/126	1.039	23	[1.143]		130/126	0.972	23	[1.184]		131/126	0.962	23	[1.155]		129/127	1.119	23	1.053	*	130/127	1.026	23	1.043	*	131/127	1.046	23	1.044	*	129/128	1.341	23	1.1	*	130/128	1.228
1071	gi|363733689	PREDICTED: LOW QUALITY PROTEIN: dysferlin, partial [Gallus gallus]	663	249937	27	23	13	11	8.6	5.47	0.2	Quantitation summary for protein	129/126	0.847	18	1.073	*	130/126	0.907	19	1.087	*	131/126	0.895	19	1.108	*	129/127	0.973	19	1.058	*	130/127	1.027	20	[1.083]		131/127	1.046	20	1.061	*	129/128	0.389	19	1.109	*	130/128	0.409
1072	gi|60098969	hypothetical protein RCJMB04_17g4 [Gallus gallus]	663	61492	21	20	8	8	15.1	6.09	0.6	Quantitation summary for protein	129/126	1.033	19	1.109		130/126	0.756	20	[1.192]		131/126	0.754	20	[1.144]		129/127	0.96	20	1.055	*	130/127	0.928	20	[1.049]		131/127	0.954	20	1.047	*	129/128	1.004	20	1.121		130/128	0.97
1073	gi|53128602	hypothetical protein RCJMB04_4p18 [Gallus gallus]	662	73508	22	21	8	8	16.1	9.33	0.55	Quantitation summary for protein	129/126	0.738	21	1.127	*	130/126	0.981	22	1.182		131/126	0.888	22	1.098	*	129/127	0.791	20	[1.064]		130/127	1.033	21	1.091		131/127	0.962	21	1.07	*	129/128	0.693	21	1.132	*	130/128	0.904
1074	gi|60098571	hypothetical protein RCJMB04_3m24 [Gallus gallus]	662	123578	43	35	19	15	21.7	5.23	0.64	Quantitation summary for protein	129/126	1.11	36	1.086	*	130/126	1.1	36	[1.189]		131/126	1.226	36	1.083	*	129/127	0.947	37	1.062	*	130/127	0.921	37	[1.078]		131/127	1.057	36	[1.068]		129/128	0.427	37	[1.151]		130/128	0.415
1075	gi|143771685	15 kDa selenoprotein precursor [Gallus gallus]	662	20335	17	15	6	6	37.5	5.28	1.92	Quantitation summary for protein	129/126	0.813	17	1.162	*	130/126	0.744	17	1.278	*	131/126	0.862	17	1.162	*	129/127	0.751	17	1.069	*	130/127	0.674	17	1.109	*	131/127	0.804	17	1.068	*	129/128	1.51	17	1.373	*	130/128	1.354
1076	gi|363742196	PREDICTED: CTP synthase 1 [Gallus gallus]	662	83541	28	22	10	9	18.3	8.24	0.53	Quantitation summary for protein	129/126	1.165	18	1.063	*	130/126	1.349	20	1.155	*	131/126	1.108	19	1.081	*	129/127	0.882	19	[1.107]		130/127	1	19	[1.138]		131/127	0.844	19	1.063	*	129/128	0.502	18	1.202	*	130/128	0.566
1077	gi|363739404	PREDICTED: Na(+)/H(+) exchange regulatory cofactor NHE-RF2 [Gallus gallus]	661	45948	22	18	8	5	29.7	7.74	1.14	Quantitation summary for protein	129/126	0.78	21	1.059	*	130/126	0.701	21	1.047	*	131/126	0.702	21	1.078	*	129/127	0.912	21	[1.272]		130/127	0.804	21	[1.259]		131/127	0.829	21	[1.247]		129/128	1.371	21	1.088	*	130/128	1.173
1078	gi|10567592	SLP-76 adaptor protein [Gallus gallus]	661	67736	44	33	14	11	25.8	5.93	1.24	Quantitation summary for protein	129/126	0.676	38	[1.086]		130/126	0.579	37	1.104	*	131/126	0.667	38	[1.084]		129/127	1.243	38	[1.053]		130/127	1.035	38	1.058	*	131/127	1.239	38	[1.055]		129/128	1.28	38	[1.127]		130/128	1.064
1079	gi|363736407	PREDICTED: LOW QUALITY PROTEIN: laminin subunit gamma-1 [Gallus gallus]	661	198722	33	29	13	11	9.9	4.97	0.22	Quantitation summary for protein	129/126	1.16	31	1.078	*	130/126	1.506	31	1.141	*	131/126	1.25	30	1.087	*	129/127	0.762	31	[1.060]		130/127	0.97	31	1.037	*	131/127	0.829	30	[1.043]		129/128	0.829	31	1.1	*	130/128	1.055
1080	gi|363743683	PREDICTED: tyrosine-protein kinase ZAP-70 [Gallus gallus]	660	80900	27	23	10	7	19.5	7.16	0.37	Quantitation summary for protein	129/126	0.791	16	1.042	*	130/126	0.763	16	1.079	*	131/126	0.852	16	1.051	*	129/127	0.587	16	1.087	*	130/127	0.555	16	[1.071]		131/127	0.639	16	1.054	*	129/128	0.424	16	1.083	*	130/128	0.401
1081	gi|208610021	eukaryotic peptide chain release factor GTP-binding subunit ERF3A [Gallus gallus]	660	79071	31	26	17	15	36.7	5.07	0.92	Quantitation summary for protein	129/126	1.007	28	1.093		130/126	1.003	28	1.207		131/126	1.001	28	[1.166]		129/127	1.099	28	1.106	*	130/127	1.073	28	1.058	*	131/127	1.103	28	[1.084]		129/128	0.911	27	1.196	*	130/128	0.893
1082	gi|211957	immunoglobulin heavy chain V-region, partial [Gallus gallus]	660	12393	27	23	8	8	77.6	9.34	10.42	Quantitation summary for protein	129/126	0.249	7	1.146	*	130/126	0.155	7	1.198	*	131/126	0.427	7	[1.233]		129/127	0.858	7	1.054	*	130/127	0.521	7	1.071	*	131/127	1.484	7	1.063	*	129/128	1.936	7	1.19	*	130/128	1.175
1083	gi|53130344	hypothetical protein RCJMB04_7b21 [Gallus gallus]	659	28111	17	16	5	5	34.7	4.56	1.74	Quantitation summary for protein	129/126	0.995	17	[1.146]		130/126	1.086	17	1.193		131/126	1.015	17	1.182		129/127	0.913	17	1.08	*	130/127	1.01	16	1.069		131/127	0.941	17	[1.092]		129/128	1.407	17	1.095	*	130/128	1.504
1084	gi|22128505	pyruvate carboxylase [Gallus gallus]	658	267810	34	26	19	16	21.9	6.26	0.24	Quantitation summary for protein	129/126	0.904	28	[1.047]		130/126	0.809	27	1.054	*	131/126	0.834	28	[1.053]		129/127	0.999	28	1.037		130/127	0.924	27	1.033	*	131/127	0.955	27	1.027	*	129/128	0.997	28	1.064		130/128	0.904
1085	gi|363747241	PREDICTED: macrophage-capping protein-like [Gallus gallus]	658	41812	21	19	8	7	33.3	5.74	0.84	Quantitation summary for protein	129/126	1.107	19	[1.091]		130/126	0.859	19	[1.117]		131/126	0.815	18	1.066	*	129/127	1.445	19	1.073	*	130/127	1.099	19	1.056	*	131/127	1.076	19	1.055	*	129/128	1.323	19	[1.073]		130/128	1.006
1086	gi|53130514	hypothetical protein RCJMB04_8f7 [Gallus gallus]	658	44724	30	25	11	10	36.7	6.32	1.04	Quantitation summary for protein	129/126	1.083	25	1.066	*	130/126	1.43	25	[1.116]		131/126	1.055	25	1.084	*	129/127	0.987	23	1.048		130/127	1.256	25	[1.056]		131/127	0.954	25	[1.044]		129/128	0.689	25	1.137	*	130/128	0.892
1087	gi|197304384	transporter associated with antigen processing 2 [Gallus gallus]	657	78621	20	19	9	9	17.8	6.56	0.63	Quantitation summary for protein	129/126	0.88	19	1.118	*	130/126	0.984	17	1.104		131/126	0.998	19	1.154		129/127	0.794	18	1.074	*	130/127	0.863	18	1.08	*	131/127	0.91	18	1.058	*	129/128	0.381	19	1.247	*	130/128	0.413
1088	gi|7533038	small acidic protein [Gallus gallus]	656	22226	12	12	3	3	27.3	5.31	0.76	Quantitation summary for protein	129/126	0.615	12	1.106	*	130/126	0.54	12	1.156	*	131/126	0.562	12	[1.100]		129/127	1.233	12	1.109	*	130/127	1.06	12	1.092	*	131/127	1.138	12	1.108	*	129/128	1.531	12	1.178	*	130/128	1.315
1089	gi|53130428	hypothetical protein RCJMB04_7m18 [Gallus gallus]	655	17670	34	31	8	8	50	6.55	7.18	Quantitation summary for protein	129/126	0.975	33	1.105		130/126	0.937	33	[1.195]		131/126	0.918	33	1.117	*	129/127	1.117	33	[1.043]		130/127	1.052	33	[1.058]		131/127	1.062	33	[1.038]		129/128	1.192	33	1.107	*	130/128	1.122
1090	gi|53133542	hypothetical protein RCJMB04_17k23 [Gallus gallus]	655	33156	34	28	12	10	53.9	6.92	2.45	Quantitation summary for protein	129/126	1.009	24	[1.089]		130/126	0.927	24	[1.125]		131/126	0.918	24	1.091	*	129/127	1.396	24	1.069	*	130/127	1.259	24	1.073	*	131/127	1.283	24	1.078	*	129/128	0.713	24	[1.119]		130/128	0.642
1091	gi|50741755	PREDICTED: pre-mRNA-splicing regulator WTAP [Gallus gallus]	655	50463	31	25	13	12	34.6	5.15	1.42	Quantitation summary for protein	129/126	0.748	27	[1.112]		130/126	0.845	27	[1.225]		131/126	0.804	27	1.123	*	129/127	1.01	27	[1.061]		130/127	1.127	26	1.065	*	131/127	1.096	27	1.051	*	129/128	0.911	27	[1.192]		130/128	1.008
1092	gi|363738498	PREDICTED: putative RNA-binding protein 15B [Gallus gallus]	654	100529	32	26	10	9	9.1	9.32	0.52	Quantitation summary for protein	129/126	1.478	29	1.105	*	130/126	1.323	29	[1.266]		131/126	1.532	29	1.121	*	129/127	1.702	29	1.087	*	130/127	1.501	28	1.093	*	131/127	1.781	29	1.072	*	129/128	2.106	29	1.291	*	130/128	1.846
1093	gi|363739959	PREDICTED: squamous cell carcinoma antigen recognized by T-cells 3 [Gallus gallus]	654	122977	30	27	9	7	10.8	5.26	0.44	Quantitation summary for protein	129/126	1.223	26	1.078	*	130/126	1.303	26	1.112	*	131/126	1.129	26	1.078	*	129/127	0.917	26	1.074	*	130/127	0.959	26	1.072	*	131/127	0.856	26	1.067	*	129/128	0.508	26	1.082	*	130/128	0.53
1094	gi|363731709	PREDICTED: plasma alpha-L-fucosidase [Gallus gallus]	654	59074	34	29	11	9	29.4	6.12	0.92	Quantitation summary for protein	129/126	0.984	30	1.073		130/126	0.893	30	1.111	*	131/126	0.947	30	1.087	*	129/127	1.181	29	[1.057]		130/127	1.05	29	[1.058]		131/127	1.147	29	[1.048]		129/128	1.009	30	[1.072]		130/128	0.897
1095	gi|53133428	hypothetical protein RCJMB04_16h16 [Gallus gallus]	653	41487	21	20	7	6	26.2	4.63	0.99	Quantitation summary for protein	129/126	1.048	18	1.052	*	130/126	0.906	21	1.164	*	131/126	0.954	21	[1.103]		129/127	1.212	21	[1.066]		130/127	1.025	21	[1.080]		131/127	1.112	21	1.051	*	129/128	1.584	21	1.132	*	130/128	1.341
1096	gi|363746070	PREDICTED: protein ETHE1, mitochondrial, partial [Gallus gallus]	652	16536	19	19	5	5	31.3	10.21	3.44	Quantitation summary for protein	129/126	0.644	18	1.14	*	130/126	0.541	19	1.229	*	131/126	0.538	19	1.19	*	129/127	1.093	19	1.154	*	130/127	0.908	19	[1.251]		131/127	0.931	19	1.15	*	129/128	1.693	18	1.178	*	130/128	1.404
1097	gi|363727621	PREDICTED: 60S ribosomal protein L18a, partial [Gallus gallus]	652	27667	33	25	9	8	36.1	10.9	3.92	Quantitation summary for protein	129/126	1.21	30	1.055	*	130/126	1.147	30	1.096	*	131/126	1.228	30	1.057	*	129/127	1.006	30	1.032		130/127	0.935	30	1.044	*	131/127	1.031	30	1.032	*	129/128	0.701	30	[1.105]		130/128	0.651
1098	gi|53130754	hypothetical protein RCJMB04_9n22 [Gallus gallus]	652	22375	26	24	9	8	69.5	8.68	3.63	Quantitation summary for protein	129/126	1.251	23	[1.110]		130/126	1.38	23	1.162	*	131/126	1.207	23	1.09	*	129/127	0.976	23	1.063		130/127	1.055	23	1.06	*	131/127	0.95	23	1.071	*	129/128	0.784	21	1.102	*	130/128	0.798
1099	gi|363744458	PREDICTED: UPF0553 protein C9orf64 isoform 1 [Gallus gallus]	652	44993	28	25	13	11	36.4	5.82	1.9	Quantitation summary for protein	129/126	1.185	26	1.102	*	130/126	1.518	18	1.066	*	131/126	1.208	26	1.111	*	129/127	0.738	26	1.044	*	130/127	1.063	27	[1.112]		131/127	0.768	24	1.029	*	129/128	0.493	20	1.074	*	130/128	0.563
1100	gi|53133810	hypothetical protein RCJMB04_20j14 [Gallus gallus]	651	47423	39	30	10	7	20.1	11.53	1.24	Quantitation summary for protein	129/126	0.745	29	[1.072]		130/126	0.761	29	1.132	*	131/126	0.782	29	1.077	*	129/127	0.951	29	1.043	*	130/127	0.953	29	1.043	*	131/127	1.009	29	1.035		129/128	1.309	29	1.137	*	130/128	1.31
1101	gi|53127386	hypothetical protein RCJMB04_2b13 [Gallus gallus]	650	56260	28	23	10	8	29.6	6.82	0.87	Quantitation summary for protein	129/126	1.061	28	1.062	*	130/126	1.154	28	1.076	*	131/126	1.079	28	1.063	*	129/127	1.021	27	1.044	*	130/127	1.085	28	[1.046]		131/127	1.045	28	1.056	*	129/128	0.852	28	[1.068]		130/128	0.907
1102	gi|53136600	hypothetical protein RCJMB04_31h10 [Gallus gallus]	648	46164	29	23	10	8	36.4	4.7	1.14	Quantitation summary for protein	129/126	0.884	25	1.056	*	130/126	0.77	25	[1.102]		131/126	0.821	25	1.062	*	129/127	1.417	25	1.057	*	130/127	1.21	25	1.068	*	131/127	1.328	25	1.058	*	129/128	1.395	25	1.09	*	130/128	1.189
1103	gi|50806588	PREDICTED: 60S ribosomal protein L17 [Gallus gallus]	647	27799	44	34	9	9	38	10.2	5.14	Quantitation summary for protein	129/126	1.129	38	1.27	*	130/126	1.153	38	1.423	*	131/126	0.991	38	[1.313]		129/127	1.174	40	[1.093]		130/127	1.175	40	1.103	*	131/127	1.042	40	[1.077]		129/128	0.491	40	[1.232]		130/128	0.49
1104	gi|363741127	PREDICTED: pre-rRNA-processing protein TSR1 homolog [Gallus gallus]	646	105696	22	19	7	5	13.6	6.43	0.24	Quantitation summary for protein	129/126	1.019	21	1.067		130/126	0.842	21	1.076	*	131/126	0.995	21	1.065		129/127	1.19	21	1.051	*	130/127	0.964	21	1.044	*	131/127	1.173	21	1.046	*	129/128	1.099	21	[1.135]		130/128	0.89
1105	gi|62888	decorin [Gallus gallus]	643	46248	26	22	11	9	31.7	8.71	0.99	Quantitation summary for protein	129/126	0.688	22	[1.169]		130/126	0.824	22	[1.222]		131/126	0.717	22	[1.174]		129/127	0.874	22	1.064	*	130/127	1.026	22	1.048	*	131/127	0.92	22	1.048	*	129/128	0.896	22	1.078	*	130/128	1.052
1106	gi|363727937	PREDICTED: DCC-interacting protein 13-beta [Gallus gallus]	643	82892	24	19	14	10	32.4	5.14	0.66	Quantitation summary for protein	129/126	1.205	22	1.103	*	130/126	1.23	22	1.144	*	131/126	1.365	22	1.14	*	129/127	0.968	22	[1.067]		130/127	0.969	22	[1.076]		131/127	1.107	22	[1.052]		129/128	0.974	22	1.121		130/128	0.973
1107	gi|310772235	cystatin B (stefin B) [Gallus gallus]	642	13501	17	14	4	4	58.2	6.18	3.83	Quantitation summary for protein	129/126	0.872	15	1.116	*	130/126	1.028	15	[1.177]		131/126	0.914	15	[1.111]		129/127	0.807	15	1.073	*	130/127	0.932	15	[1.066]		131/127	0.854	15	[1.079]		129/128	1.537	14	1.076	*	130/128	1.464
1108	gi|363742887	PREDICTED: selenium-binding protein 1-A-like [Gallus gallus]	642	61291	28	23	11	9	28.4	6.21	0.87	Quantitation summary for protein	129/126	0.938	18	[1.111]		130/126	1.07	18	[1.189]		131/126	0.869	18	[1.117]		129/127	0.88	18	1.054	*	130/127	0.985	18	[1.070]		131/127	0.823	18	1.041	*	129/128	0.753	18	1.14	*	130/128	0.842
1109	gi|363732914	PREDICTED: fragile X mental retardation protein 1 homolog B isoform 1 [Gallus gallus]	641	70336	27	21	13	10	26.3	6.51	0.58	Quantitation summary for protein	129/126	0.504	22	[1.180]		130/126	0.471	22	[1.299]		131/126	0.498	22	[1.219]		129/127	1.127	22	1.064	*	130/127	1.032	22	[1.062]		131/127	1.123	22	1.042	*	129/128	1.181	22	1.136	*	130/128	1.08
1110	gi|302486333	suppressor of G2 allele of SKP1 homolog [Gallus gallus]	640	45094	35	31	9	9	37	5.48	1.03	Quantitation summary for protein	129/126	0.911	12	1.077	*	130/126	1.035	12	1.116		131/126	0.948	12	1.067	*	129/127	1.052	12	1.073	*	130/127	1.172	12	1.103	*	131/127	1.101	11	1.075	*	129/128	0.887	12	1.156	*	130/128	0.987
1111	gi|363728921	PREDICTED: cytoplasmic FMR1-interacting protein 1 [Gallus gallus]	639	164384	36	28	12	11	10.2	6.49	0.34	Quantitation summary for protein	129/126	0.968	10	1.095		130/126	0.922	10	1.07	*	131/126	1.091	10	1.095	*	129/127	0.929	10	1.084	*	130/127	0.868	10	1.087	*	131/127	1.057	10	1.07	*	129/128	0.241	10	1.14	*	130/128	0.225
1112	gi|53135802	hypothetical protein RCJMB04_25o1 [Gallus gallus]	638	43274	31	24	14	11	46.5	8.77	2.01	Quantitation summary for protein	129/126	0.902	26	[1.098]		130/126	0.88	26	[1.205]		131/126	0.791	26	[1.117]		129/127	1.028	25	1.059	*	130/127	0.994	26	1.055		131/127	0.911	25	1.052	*	129/128	1.34	26	1.189	*	130/128	1.28
1113	gi|363734605	PREDICTED: catenin delta-1 [Gallus gallus]	637	119672	37	30	15	14	16.4	5.94	0.67	Quantitation summary for protein	129/126	1.218	31	[1.118]		130/126	1.511	31	[1.128]		131/126	1.391	31	[1.120]		129/127	0.782	31	1.054	*	130/127	0.95	31	[1.063]		131/127	0.901	31	[1.054]		129/128	0.765	31	1.081	*	130/128	0.93
1114	gi|7415601	protein kinase C inhibitor [Gallus gallus]	636	15697	24	22	6	6	62.7	6.28	4.85	Quantitation summary for protein	129/126	0.856	22	1.133	*	130/126	0.676	22	1.344	*	131/126	0.738	22	1.138	*	129/127	1.246	22	1.101	*	130/127	0.965	22	1.132		131/127	1.085	22	1.076	*	129/128	1.841	22	1.338	*	130/128	1.425
1115	gi|53127328	hypothetical protein RCJMB04_1n4 [Gallus gallus]	635	39134	26	22	10	8	30.2	9.74	1.65	Quantitation summary for protein	129/126	1.041	3	1.309		130/126	1.23	3	1.24		131/126	1.341	3	1.388		129/127	0.886	3	1.056		130/127	1.026	3	1.08		131/127	1.152	3	1.06		129/128	0.42	3	1.321	*	130/128	0.486
1116	gi|3450875	caspase-3 [Gallus gallus]	635	36980	27	21	9	7	35.7	6.45	1.36	Quantitation summary for protein	129/126	1.017	26	1.053		130/126	1.072	26	1.073	*	131/126	1.087	26	1.059	*	129/127	0.867	26	[1.053]		130/127	0.896	26	1.052	*	131/127	0.936	26	[1.049]		129/128	0.68	26	[1.121]		130/128	0.702
1117	gi|211386	calmodulin [Gallus gallus]	634	18889	44	28	9	7	51.7	4.09	7.47	Quantitation summary for protein	129/126	0.868	16	1.159	*	130/126	2.949	16	1.252	*	131/126	0.898	16	1.132	*	129/127	0.804	16	[1.077]		130/127	2.679	16	1.207	*	131/127	0.84	16	[1.090]		129/128	1.004	16	1.2		130/128	3.342
1118	gi|53130356	hypothetical protein RCJMB04_7d16 [Gallus gallus]	632	75962	32	30	10	9	18.3	5.25	0.81	Quantitation summary for protein	129/126	1.249	23	1.122	*	130/126	1.584	23	1.204	*	131/126	1.409	23	1.122	*	129/127	0.72	23	1.079	*	130/127	0.916	25	1.045	*	131/127	0.84	24	1.067	*	129/128	0.3	24	1.222	*	130/128	0.382
1119	gi|363745992	PREDICTED: ATP synthase subunit delta, mitochondrial-like, partial [Gallus gallus]	632	14648	21	19	7	6	56.1	4.49	7.07	Quantitation summary for protein	129/126	1.078	19	[1.198]		130/126	0.617	19	1.433	*	131/126	1.007	19	[1.226]		129/127	1.485	19	1.163	*	130/127	0.833	19	1.133	*	131/127	1.401	19	1.132	*	129/128	3.967	19	1.294	*	130/128	2.223
1120	gi|118101426	PREDICTED: prenylcysteine oxidase [Gallus gallus]	632	62389	20	18	7	7	20.9	7.21	0.59	Quantitation summary for protein	129/126	1.383	18	1.155	*	130/126	1.407	18	1.217	*	131/126	1.412	18	1.152	*	129/127	1.065	18	1.098	*	130/127	1.062	18	[1.083]		131/127	1.098	18	1.087	*	129/128	1.418	18	1.187	*	130/128	1.413
1121	gi|53136700	hypothetical protein RCJMB04_32j11 [Gallus gallus]	632	27265	23	23	6	6	37.7	8.29	1.82	Quantitation summary for protein	129/126	1.093	15	1.125	*	130/126	0.999	15	1.157		131/126	1.139	16	1.172	*	129/127	1.128	16	1.058	*	130/127	1.043	15	1.062	*	131/127	1.028	16	1.043	*	129/128	0.474	16	1.129	*	130/128	0.43
1122	gi|21392371	BH3 interacting domain death agonist [Gallus gallus]	631	23708	25	19	8	7	37.3	4.81	2.74	Quantitation summary for protein	129/126	1.311	17	1.119	*	130/126	1.184	18	[1.328]		131/126	1.399	17	1.133	*	129/127	0.893	18	1.08	*	130/127	0.857	18	[1.099]		131/127	0.957	18	[1.063]		129/128	0.661	19	1.118	*	130/128	0.634
1123	gi|63784	RSFR [Gallus gallus]	631	17482	21	18	5	4	40.3	10	4.89	Quantitation summary for protein	129/126	1.387	20	[1.155]		130/126	1.087	20	[1.158]		131/126	0.963	20	[1.098]		129/127	1.584	20	1.131	*	130/127	1.326	20	1.092	*	131/127	1.21	20	[1.048]		129/128	1.693	20	1.177	*	130/128	1.436
1124	gi|363729544	PREDICTED: rho-related GTP-binding protein RhoG-like [Gallus gallus]	631	24929	16	16	7	7	41.4	8.71	1.73	Quantitation summary for protein	129/126	0.801	14	1.099	*	130/126	0.881	14	1.177	*	131/126	1.007	14	1.117		129/127	0.784	14	1.099	*	130/127	0.845	14	1.119	*	131/127	0.994	14	1.045		129/128	0.337	14	1.415	*	130/128	0.363
1125	gi|53136628	hypothetical protein RCJMB04_31o2 [Gallus gallus]	629	48208	30	24	11	9	28.6	9.4	1.07	Quantitation summary for protein	129/126	0.877	25	[1.088]		130/126	0.743	25	[1.150]		131/126	0.942	25	[1.087]		129/127	0.928	25	[1.060]		130/127	0.746	23	1.037	*	131/127	1.008	24	1.045		129/128	0.563	25	1.212	*	130/128	0.468
1126	gi|118093267	PREDICTED: putative methyltransferase DDB_G0268948 isoform 1 [Gallus gallus]	622	35224	20	18	10	8	28	6	1.46	Quantitation summary for protein	129/126	0.942	18	1.211		130/126	1.305	18	[1.288]		131/126	1.123	18	[1.214]		129/127	0.666	18	1.069	*	130/127	0.905	18	1.058	*	131/127	0.802	18	1.059	*	129/128	0.586	18	1.126	*	130/128	0.826
1127	gi|53132504	hypothetical protein RCJMB04_13i11 [Gallus gallus]	621	104985	26	22	12	9	16.6	6.37	0.45	Quantitation summary for protein	129/126	1	23	1.123		130/126	1.22	23	[1.350]		131/126	1.297	23	[1.129]		129/127	1.011	23	[1.087]		130/127	1.21	23	[1.140]		131/127	1.324	23	[1.085]		129/128	0.452	23	1.258	*	130/128	0.54
1128	gi|363738644	PREDICTED: LOW QUALITY PROTEIN: glutathione peroxidase 1-like [Gallus gallus]	620	24111	32	27	11	9	67.2	7.74	7.01	Quantitation summary for protein	129/126	0.312	29	[1.248]		130/126	0.301	27	[1.406]		131/126	0.283	28	1.273	*	129/127	0.252	29	1.242	*	130/127	0.237	27	1.231	*	131/127	0.23	28	1.233	*	129/128	0.537	28	1.255	*	130/128	0.505
1129	gi|53131063	hypothetical protein RCJMB04_11c19 [Gallus gallus]	619	22942	27	25	12	10	60.1	4.4	4.86	Quantitation summary for protein	129/126	0.861	26	1.265	*	130/126	0.95	25	1.428		131/126	0.794	26	1.257	*	129/127	0.935	26	1.13	*	130/127	1.001	26	1.189		131/127	0.868	25	1.118	*	129/128	0.944	26	[1.443]		130/128	1.009
1130	gi|363736746	PREDICTED: vascular cell adhesion protein 1 [Gallus gallus]	618	71078	26	22	9	8	16.5	6.25	0.57	Quantitation summary for protein	129/126	1.29	23	[1.096]		130/126	1.391	23	[1.165]		131/126	1.186	23	[1.108]		129/127	1.043	23	[1.079]		130/127	1.102	23	1.039	*	131/127	0.968	23	1.062	*	129/128	1.06	23	1.145		130/128	1.119
1131	gi|363741113	PREDICTED: eukaryotic translation initiation factor 4H-like isoform 1 [Gallus gallus]	618	31113	30	24	8	7	32.3	7.77	2.06	Quantitation summary for protein	129/126	1.003	25	[1.160]		130/126	0.952	25	[1.272]		131/126	0.678	25	1.163	*	129/127	1.673	25	1.079	*	130/127	1.557	25	[1.109]		131/127	1.142	25	1.062	*	129/128	1.688	25	[1.135]		130/128	1.57
1132	gi|2516264	mu-calpain large subunit [Gallus gallus]	617	89720	42	34	15	12	23.6	5.78	0.65	Quantitation summary for protein	129/126	0.721	24	1.14	*	130/126	0.586	24	1.18	*	131/126	0.663	24	[1.153]		129/127	0.97	24	1.081		130/127	0.773	24	[1.074]		131/127	0.9	24	1.052	*	129/128	0.695	24	[1.151]		130/128	0.553
1133	gi|118093867	PREDICTED: histamine N-methyltransferase [Gallus gallus]	617	37964	20	20	6	6	23.3	5.57	0.95	Quantitation summary for protein	129/126	1.068	20	1.075	*	130/126	0.952	20	1.103	*	131/126	1.007	20	1.1		129/127	1.283	20	1.083	*	130/127	1.137	19	1.051	*	131/127	1.221	20	1.084	*	129/128	0.677	20	1.095	*	130/128	0.591
1134	gi|402507	ribosomal protein L30 [Gallus gallus]	617	16414	34	23	9	6	60.9	9.65	15.64	Quantitation summary for protein	129/126	1.015	29	1.067		130/126	1.074	29	1.122	*	131/126	1.164	29	1.094	*	129/127	0.978	29	1.051	*	130/127	1.015	29	1.043		131/127	1.133	29	1.045	*	129/128	1.059	29	1.093	*	130/128	1.099
1135	gi|53136762	hypothetical protein RCJMB04_33h20 [Gallus gallus]	616	38970	17	16	6	5	30.2	7.72	1.08	Quantitation summary for protein	129/126	0.998	16	1.047		130/126	0.993	17	[1.139]		131/126	0.862	17	1.084	*	129/127	1.089	17	1.049	*	130/127	1.042	16	1.051	*	131/127	0.914	17	1.053	*	129/128	1.594	17	1.081	*	130/128	1.497
1136	gi|53128332	hypothetical protein RCJMB04_4l18 [Gallus gallus]	616	23932	24	22	5	5	26.4	7.9	2.24	Quantitation summary for protein	129/126	0.825	24	1.083	*	130/126	0.719	24	1.062	*	131/126	0.726	24	1.068	*	129/127	2.07	24	1.075	*	130/127	1.789	23	1.048	*	131/127	1.84	24	[1.074]		129/128	2.301	24	1.097	*	130/128	1.964
1137	gi|118096950	PREDICTED: coiled-coil domain-containing protein 72 [Gallus gallus]	616	11604	28	22	2	2	29.7	10.05	1.81	Quantitation summary for protein	129/126	1.317	24	1.105	*	130/126	1.432	24	1.09	*	131/126	1.581	23	1.091	*	129/127	1.032	27	1.079	*	130/127	1.1	27	1.087	*	131/127	1.056	26	1.075	*	129/128	1.565	24	1.108	*	130/128	1.667
1138	gi|289800	initiation factor 5A [Gallus gallus]	616	20432	32	25	8	5	44.4	5.37	4.34	Quantitation summary for protein	129/126	1.515	18	1.212	*	130/126	1.766	18	[1.390]		131/126	1.407	18	[1.203]		129/127	0.934	18	1.087	*	130/127	1.067	18	1.14	*	131/127	0.875	18	1.075	*	129/128	0.383	18	[1.325]		130/128	0.438
1139	gi|363743615	PREDICTED: mitochondrial import inner membrane translocase subunit Tim13-A-like [Gallus gallus]	615	12835	17	16	4	4	49.5	8.42	3.11	Quantitation summary for protein	129/126	0.984	15	1.23		130/126	0.902	15	1.261		131/126	0.9	15	1.21		129/127	1.1	16	1.061	*	130/127	0.989	16	1.067		131/127	1.017	16	1.087		129/128	2.182	16	1.111	*	130/128	1.959
1140	gi|60098521	hypothetical protein RCJMB04_3i14 [Gallus gallus]	615	61168	24	20	11	9	26.6	7.21	0.87	Quantitation summary for protein	129/126	0.966	22	1.058	*	130/126	0.91	22	1.087	*	131/126	0.873	22	1.077	*	129/127	1.083	22	1.042	*	130/127	1.001	22	1.019		131/127	0.989	22	1.03		129/128	1.679	22	1.083	*	130/128	1.55
1141	gi|363732775	PREDICTED: MAP7 domain-containing protein 2 [Gallus gallus]	614	85789	24	19	14	10	21.8	6.65	0.57	Quantitation summary for protein	129/126	0.864	21	1.166	*	130/126	0.897	21	[1.341]		131/126	0.905	21	1.186	*	129/127	1.125	21	1.105	*	130/127	1.145	21	1.112	*	131/127	1.19	21	1.092	*	129/128	1.1	21	[1.219]		130/128	1.119
1142	gi|19335967	diazepam binding inhibitor [Gallus gallus]	613	13007	29	21	7	4	58.6	6.56	7.2	Quantitation summary for protein	129/126	---	1	---		130/126	---	1	---		131/126	---	1	---		129/127	---	1	---		130/127	---	1	---		131/127	---	1	---		129/128	---	1	---		130/128	---
1143	gi|53130432	hypothetical protein RCJMB04_7n10 [Gallus gallus]	613	61966	23	21	10	10	21	9.66	0.68	Quantitation summary for protein	129/126	0.95	19	[1.091]		130/126	0.894	19	[1.128]		131/126	0.959	19	[1.102]		129/127	1.123	19	1.028	*	130/127	1.037	19	1.037	*	131/127	1.146	19	1.018	*	129/128	1.004	19	[1.079]		130/128	0.926
1144	gi|363739759	PREDICTED: uncharacterized protein LOC416755 [Gallus gallus]	613	100098	23	22	7	6	8.1	5.16	0.25	Quantitation summary for protein	129/126	1.016	22	1.059		130/126	1.183	22	[1.099]		131/126	1.222	22	1.078	*	129/127	1.055	22	1.041	*	130/127	1.204	22	[1.042]		131/127	1.281	22	[1.042]		129/128	0.58	21	1.047	*	130/128	0.679
1145	gi|118089434	PREDICTED: WD repeat-containing protein 44 isoform 1 [Gallus gallus]	613	118721	26	23	14	13	22.8	5.39	0.42	Quantitation summary for protein	129/126	1.086	23	1.076	*	130/126	1.314	24	1.142	*	131/126	1.141	23	1.094	*	129/127	1.084	24	1.081	*	130/127	1.282	22	1.041	*	131/127	1.152	24	1.069	*	129/128	0.858	23	1.092	*	130/128	1.026
1146	gi|118100901	PREDICTED: breast carcinoma-amplified sequence 1 homolog [Gallus gallus]	612	45480	25	23	10	8	33.8	9.54	1.01	Quantitation summary for protein	129/126	0.662	24	[1.109]		130/126	0.922	24	[1.207]		131/126	0.579	24	[1.126]		129/127	1.274	24	[1.064]		130/127	1.741	24	[1.101]		131/127	1.125	24	1.052	*	129/128	1.371	24	1.19	*	130/128	1.872
1147	gi|118098348	PREDICTED: thiomorpholine-carboxylate dehydrogenase [Gallus gallus]	612	35823	17	16	5	4	16.2	5.75	0.56	Quantitation summary for protein	129/126	1.162	17	[1.068]		130/126	1.044	17	[1.114]		131/126	0.906	17	1.063	*	129/127	1.276	17	1.041	*	130/127	1.124	17	1.036	*	131/127	1.005	17	1.045		129/128	1.252	17	1.097	*	130/128	1.102
1148	gi|126651	RecName: Full=Procollagen-lysine,2-oxoglutarate 5-dioxygenase 1; AltName: Full=Lysyl hydroxylase 1; Short=LH1; Flags: Precursor	611	96007	29	21	11	8	16.3	6.27	0.55	Quantitation summary for protein	129/126	1.087	23	[1.093]		130/126	1.11	23	[1.182]		131/126	1.076	22	1.076	*	129/127	1.171	22	1.041	*	130/127	1.178	23	[1.066]		131/127	1.146	23	1.052	*	129/128	1.311	23	[1.109]		130/128	1.353
1149	gi|310772238	glutathione S-transferase kappa 1 [Gallus gallus]	610	28832	26	19	7	7	27.7	8.89	1.15	Quantitation summary for protein	129/126	1.166	23	1.074	*	130/126	1.129	23	[1.083]		131/126	1.24	23	1.095	*	129/127	1.642	23	[1.065]		130/127	1.559	23	1.049	*	131/127	1.764	23	[1.051]		129/128	1.605	23	[1.090]		130/128	1.523
1150	gi|53126991	hypothetical protein RCJMB04_1i11 [Gallus gallus]	609	32876	25	21	11	10	50.8	5.29	2.17	Quantitation summary for protein	129/126	0.835	23	1.17	*	130/126	0.818	23	[1.367]		131/126	0.792	23	1.181	*	129/127	0.938	22	[1.064]		130/127	0.9	22	[1.165]		131/127	0.897	22	1.063	*	129/128	0.626	23	[1.275]		130/128	0.601
1151	gi|53131339	hypothetical protein RCJMB04_11k6 [Gallus gallus]	609	62318	32	24	15	11	37.6	5.02	1.4	Quantitation summary for protein	129/126	0.927	26	1.287		130/126	0.885	26	1.589		131/126	0.764	26	1.305	*	129/127	1.136	27	1.182	*	130/127	1.064	28	1.191		131/127	0.946	28	1.157		129/128	1.491	27	1.693	*	130/128	1.382
1152	gi|53127808	hypothetical protein RCJMB04_3h19 [Gallus gallus]	608	82336	25	20	10	8	21.9	6.93	0.48	Quantitation summary for protein	129/126	0.851	21	[1.091]		130/126	0.79	21	1.11	*	131/126	0.839	21	1.092	*	129/127	0.726	21	1.1	*	130/127	0.661	21	1.089	*	131/127	0.723	21	1.079	*	129/128	1.361	21	1.08	*	130/128	1.237
1153	gi|363737640	PREDICTED: transducin-like enhancer protein 3 [Gallus gallus]	608	91811	18	17	8	7	13.3	6.81	0.28	Quantitation summary for protein	129/126	0.781	17	1.126	*	130/126	0.843	17	1.134	*	131/126	0.746	17	1.09	*	129/127	0.946	17	1.058	*	130/127	1	17	1.062		131/127	0.912	17	1.079	*	129/128	1.276	17	1.095	*	130/128	1.348
1154	gi|363738995	PREDICTED: la-related protein 1 [Gallus gallus]	608	117822	39	29	13	11	17.1	8.81	0.39	Quantitation summary for protein	129/126	0.713	31	1.124	*	130/126	0.66	31	[1.178]		131/126	0.711	31	1.143	*	129/127	1.271	31	1.045	*	130/127	1.154	31	1.062	*	131/127	1.28	31	1.045	*	129/128	0.964	31	[1.112]		130/128	0.874
1155	gi|213021176	selenocysteine lyase [Gallus gallus]	608	49133	21	16	11	9	38.8	6.68	0.91	Quantitation summary for protein	129/126	0.902	18	1.121	*	130/126	0.837	18	[1.198]		131/126	0.775	18	1.134	*	129/127	1.076	18	1.106	*	130/127	0.983	17	1.067		131/127	0.932	18	1.077	*	129/128	1.081	18	1.165	*	130/128	0.982
1156	gi|60098729	hypothetical protein RCJMB04_7d7 [Gallus gallus]	608	64479	18	17	9	9	23.5	6.99	0.82	Quantitation summary for protein	129/126	1.253	18	1.131	*	130/126	1.191	18	1.179	*	131/126	1.131	18	1.141	*	129/127	1.057	18	[1.064]		130/127	0.985	18	1.038		131/127	0.963	18	[1.038]		129/128	1.166	18	[1.131]		130/128	1.086
1157	gi|363734512	PREDICTED: cutaneous T-cell lymphoma-associated antigen 5 [Gallus gallus]	607	137551	27	20	10	8	11.4	5.56	0.26	Quantitation summary for protein	129/126	1.12	25	[1.109]		130/126	0.994	25	[1.109]		131/126	1.034	25	[1.111]		129/127	1.176	25	[1.081]		130/127	1.023	25	1.049	*	131/127	1.096	25	[1.061]		129/128	0.973	25	1.065	*	130/128	0.846
1158	gi|53136368	hypothetical protein RCJMB04_27o15 [Gallus gallus]	606	37997	29	25	9	8	30.7	7.77	1.51	Quantitation summary for protein	129/126	0.908	28	1.079	*	130/126	0.866	28	1.144	*	131/126	0.894	28	1.087	*	129/127	0.969	28	1.069	*	130/127	0.907	28	[1.071]		131/127	0.964	28	1.052	*	129/128	1.27	28	[1.117]		130/128	1.187
1159	gi|363731414	PREDICTED: bcl-2-associated transcription factor 1-like [Gallus gallus]	606	127042	28	21	8	5	10.3	9.97	0.23	Quantitation summary for protein	129/126	0.787	25	[1.080]		130/126	0.882	25	[1.139]		131/126	0.95	25	[1.088]		129/127	0.979	25	1.046	*	130/127	1.075	25	[1.094]		131/127	1.192	25	1.055	*	129/128	1.262	25	[1.086]		130/128	1.385
1160	gi|363733683	PREDICTED: LOW QUALITY PROTEIN: rab11 family-interacting protein 5, partial [Gallus gallus]	606	83582	15	15	4	4	9.9	9.37	0.26	Quantitation summary for protein	129/126	1.005	14	1.054		130/126	0.857	15	[1.113]		131/126	0.875	15	1.087	*	129/127	1.748	15	1.103	*	130/127	1.45	14	1.069	*	131/127	1.508	15	1.086	*	129/128	1.497	14	1.041	*	130/128	1.198
1161	gi|50729668	PREDICTED: protein TFG [Gallus gallus]	606	45654	31	23	12	11	38.2	4.96	1.85	Quantitation summary for protein	129/126	0.922	29	1.09	*	130/126	0.711	29	[1.183]		131/126	0.816	29	1.099	*	129/127	1.379	29	[1.088]		130/127	1.044	29	[1.100]		131/127	1.233	29	[1.084]		129/128	2.253	29	1.176	*	130/128	1.703
1162	gi|118099097	PREDICTED: dipeptidyl peptidase 2 [Gallus gallus]	604	58921	28	21	11	8	26.9	5.82	1.03	Quantitation summary for protein	129/126	1.207	22	1.085	*	130/126	0.995	22	1.078		131/126	1.125	22	1.074	*	129/127	1.164	21	1.045	*	130/127	0.932	22	1.047	*	131/127	1.086	22	[1.056]		129/128	1.309	21	[1.138]		130/128	1.059
1163	gi|363741559	PREDICTED: guanine nucleotide-binding protein G(s) subunit alpha isoform 3 [Gallus gallus]	604	44277	20	17	8	7	29.3	5.54	0.65	Quantitation summary for protein	129/126	1.077	15	1.049	*	130/126	1.397	15	[1.082]		131/126	1.163	15	[1.053]		129/127	0.756	15	1.036	*	130/127	0.962	15	1.049	*	131/127	0.825	15	1.03	*	129/128	0.363	15	1.062	*	130/128	0.461
1164	gi|1536800	immunoglobulin lambda chain variable region [Gallus gallus]	603	12139	23	18	2	2	38.1	6.78	1.72	Quantitation summary for protein	129/126	---	0	---		130/126	---	0	---		131/126	---	0	---		129/127	---	0	---		130/127	---	0	---		131/127	---	0	---		129/128	---	0	---		130/128	---
1165	gi|363739056	PREDICTED: plasma cell-induced resident endoplasmic reticulum protein-like [Gallus gallus]	602	23173	26	20	4	4	23.4	6.45	1.94	Quantitation summary for protein	129/126	1.296	21	1.127	*	130/126	0.883	21	1.104	*	131/126	1.356	21	[1.135]		129/127	1.551	21	1.104	*	130/127	1.054	20	1.079	*	131/127	1.638	21	1.121	*	129/128	1.929	20	1.126	*	130/128	1.069
1166	gi|363743473	PREDICTED: 60S ribosomal protein L23 isoform 2 [Gallus gallus]	601	18637	28	24	7	6	51.4	10.51	5.22	Quantitation summary for protein	129/126	0.941	27	[1.065]		130/126	0.779	27	1.102	*	131/126	1.008	27	[1.066]		129/127	1.11	27	1.044	*	130/127	0.9	27	1.035	*	131/127	1.2	27	1.031	*	129/128	0.964	27	[1.123]		130/128	0.781
1167	gi|2494217	RecName: Full=Cytoplasmic dynein 1 light intermediate chain 1; AltName: Full=Dynein light chain A; Short=DLC-A; AltName: Full=Dynein light intermediate chain 1, cytosolic; AltName: Full=LIC57/59	601	65367	19	17	8	7	21	5.78	0.55	Quantitation summary for protein	129/126	1.026	18	1.06		130/126	1.162	18	1.123	*	131/126	1.003	18	1.102		129/127	1.256	18	[1.093]		130/127	1.395	18	1.089	*	131/127	1.239	18	1.062	*	129/128	0.613	18	1.117	*	130/128	0.68
1168	gi|363728072	PREDICTED: LOW QUALITY PROTEIN: tetratricopeptide repeat protein 38 [Gallus gallus]	601	58569	26	24	10	10	26.4	5.66	0.93	Quantitation summary for protein	129/126	0.691	3	1.397		130/126	0.616	3	1.312		131/126	0.577	3	1.406		129/127	1.014	3	1.221		130/127	0.887	3	1.156		131/127	0.855	3	1.093		129/128	0.609	3	1.073	*	130/128	0.533
1169	gi|53133342	hypothetical protein RCJMB04_15l3 [Gallus gallus]	600	73048	22	20	12	10	26.2	6.31	0.62	Quantitation summary for protein	129/126	1.38	20	1.125	*	130/126	0.952	20	1.129		131/126	1.365	20	1.119	*	129/127	1.457	20	1.056	*	130/127	0.986	20	[1.101]		131/127	1.456	20	1.056	*	129/128	1.146	20	[1.120]		130/128	0.775
1170	gi|50740506	PREDICTED: uncharacterized protein LOC421428 [Gallus gallus]	600	25237	28	25	10	9	55	6.1	2.93	Quantitation summary for protein	129/126	0.98	27	[1.074]		130/126	1.098	27	[1.172]		131/126	0.888	27	[1.088]		129/127	1.057	27	1.053	*	130/127	1.162	27	[1.072]		131/127	0.967	27	[1.046]		129/128	1.451	27	[1.176]		130/128	1.593
1171	gi|53126422	hypothetical protein RCJMB04_1d5 [Gallus gallus]	600	116744	28	22	14	10	17.4	4.57	0.43	Quantitation summary for protein	129/126	1.029	25	[1.123]		130/126	1.249	24	1.174	*	131/126	1.141	25	1.143	*	129/127	0.924	25	[1.113]		130/127	1.079	25	1.054	*	131/127	1.034	25	[1.087]		129/128	0.666	24	1.176	*	130/128	0.791
1172	gi|53135475	hypothetical protein RCJMB04_25d21 [Gallus gallus]	599	65304	25	23	10	8	24	5.57	0.63	Quantitation summary for protein	129/126	1.544	23	1.207	*	130/126	1.449	23	1.207	*	131/126	1.339	23	[1.207]		129/127	1.267	23	1.097	*	130/127	1.166	23	1.076	*	131/127	1.11	23	[1.076]		129/128	0.914	23	[1.245]		130/128	0.84
1173	gi|256419027	eukaryotic translation initiation factor 3 subunit I [Gallus gallus]	599	40991	34	30	10	9	36.3	5.38	1.97	Quantitation summary for protein	129/126	1.261	30	1.104	*	130/126	1.199	30	1.125	*	131/126	1.172	30	1.102	*	129/127	1.062	30	1.045	*	130/127	0.99	30	1.057		131/127	0.997	30	1.049		129/128	1.831	29	1.132	*	130/128	1.704
1174	gi|118102009	PREDICTED: 40S ribosomal protein S25 [Gallus gallus]	598	20177	38	27	8	5	48	10.12	7.63	Quantitation summary for protein	129/126	1.389	30	[1.418]		130/126	0.953	29	[1.594]		131/126	1.307	30	[1.500]		129/127	1.507	29	[1.236]		130/127	1.005	29	[1.165]		131/127	1.431	29	[1.198]		129/128	1.355	29	1.325	*	130/128	0.904
1175	gi|53130328	hypothetical protein RCJMB04_7a23 [Gallus gallus]	598	37456	23	20	8	7	29.9	6.07	1.34	Quantitation summary for protein	129/126	1.067	19	1.124	*	130/126	1.682	19	1.225	*	131/126	1.101	19	1.129	*	129/127	0.752	19	1.084	*	130/127	1.162	19	1.101	*	131/127	0.784	19	1.067	*	129/128	0.92	19	1.12	*	130/128	1.421
1176	gi|53130830	hypothetical protein RCJMB04_10e23 [Gallus gallus]	597	31659	45	34	16	12	51.3	7.74	5.67	Quantitation summary for protein	129/126	1.047	38	[1.113]		130/126	0.922	38	[1.185]		131/126	0.927	38	[1.124]		129/127	1.188	38	1.036	*	130/127	1.026	38	[1.062]		131/127	1.062	38	1.025	*	129/128	1.173	38	[1.127]		130/128	1.012
1177	gi|60098771	hypothetical protein RCJMB04_8i9 [Gallus gallus]	597	27829	29	20	10	9	49.1	5.64	4.44	Quantitation summary for protein	129/126	1.097	26	1.198	*	130/126	1.582	26	1.303	*	131/126	1.133	26	1.183	*	129/127	0.805	26	[1.116]		130/127	1.138	26	1.136	*	131/127	0.839	26	1.125	*	129/128	0.584	26	[1.282]		130/128	0.825
1178	gi|53130942	hypothetical protein RCJMB04_11a4 [Gallus gallus]	597	22536	20	17	7	7	54.4	6.81	3	Quantitation summary for protein	129/126	0.893	17	1.085	*	130/126	0.715	18	1.162	*	131/126	0.848	17	1.105	*	129/127	1.126	18	1.044	*	130/127	0.869	18	1.057	*	131/127	1.084	17	1.034	*	129/128	1.658	18	[1.252]		130/128	1.279
1179	gi|30314558	retina filamin [Gallus gallus]	596	16109	16	14	6	5	43.5	7.71	2.81	Quantitation summary for protein	129/126	1.045	3	1.176		130/126	1.016	3	1.181		131/126	1.233	3	1.249		129/127	0.862	3	1.124		130/127	0.822	3	1.157		131/127	1.028	3	1.173		129/128	0.994	3	1.111		130/128	0.946
1180	gi|343176226	interferon-induced helicase C domain-containing protein 1 [Gallus gallus]	596	147448	30	24	15	12	16.2	6.72	0.42	Quantitation summary for protein	129/126	1.029	28	1.072	*	130/126	1.351	28	[1.106]		131/126	1.579	28	1.11	*	129/127	0.767	28	1.088	*	130/127	0.987	28	1.083		131/127	1.188	28	[1.100]		129/128	0.493	28	[1.117]		130/128	0.634
1181	gi|363735355	PREDICTED: actin filament associated protein 1-like 2 [Gallus gallus]	596	121603	18	17	8	7	11.4	5.68	0.2	Quantitation summary for protein	129/126	0.666	17	[1.078]		130/126	0.732	17	1.087	*	131/126	0.829	17	[1.061]		129/127	0.901	17	1.075	*	130/127	0.971	17	1.058	*	131/127	1.132	17	1.081	*	129/128	0.713	16	1.087	*	130/128	0.782
1182	gi|17127730	extracellular signal-regulated kinase 2 [Gallus gallus]	596	47815	36	31	15	14	38.9	6.5	1.91	Quantitation summary for protein	129/126	0.856	33	1.115	*	130/126	0.808	33	1.151	*	131/126	0.78	33	1.122	*	129/127	0.994	32	1.043		130/127	0.918	33	1.047	*	131/127	0.913	33	1.042	*	129/128	0.646	33	1.168	*	130/128	0.597
1183	gi|53128038	hypothetical protein RCJMB04_4h24 [Gallus gallus]	595	81113	19	17	8	7	16.5	8.05	0.32	Quantitation summary for protein	129/126	0.983	18	[1.036]		130/126	0.744	18	1.092	*	131/126	0.99	18	1.065		129/127	1.128	18	1.039	*	130/127	0.837	18	[1.059]		131/127	1.148	18	1.057	*	129/128	1.465	18	[1.110]		130/128	1.086
1184	gi|60099079	hypothetical protein RCJMB04_23c19 [Gallus gallus]	594	54948	21	21	10	10	26.6	8.08	0.9	Quantitation summary for protein	129/126	1.015	21	1.087		130/126	1.089	21	1.131	*	131/126	0.961	21	1.089	*	129/127	0.849	20	1.052	*	130/127	0.868	21	1.044	*	131/127	0.782	20	1.044	*	129/128	0.844	21	1.158	*	130/128	0.887
1185	gi|53127314	hypothetical protein RCJMB04_1m12 [Gallus gallus]	594	55016	23	20	10	9	35.3	9.13	1.39	Quantitation summary for protein	129/126	1.024	22	[1.150]		130/126	0.869	22	1.183	*	131/126	1.028	22	[1.145]		129/127	1.046	22	1.046	*	130/127	0.87	23	[1.077]		131/127	1.06	23	1.06	*	129/128	0.509	22	1.092	*	130/128	0.423
1186	gi|460838680	prefoldin subunit 1 isoform 1 [Gallus gallus]	594	17880	34	24	8	5	54.1	7.93	2.99	Quantitation summary for protein	129/126	0.88	27	1.04	*	130/126	0.821	27	1.037	*	131/126	0.858	27	1.035	*	129/127	1.111	27	1.033	*	130/127	1.016	27	1.035	*	131/127	1.094	27	1.031	*	129/128	1.772	27	1.096	*	130/128	1.619
1187	gi|53133546	hypothetical protein RCJMB04_17l7 [Gallus gallus]	594	98156	26	21	14	11	20.9	8.42	0.48	Quantitation summary for protein	129/126	0.948	21	1.12	*	130/126	1.12	21	[1.179]		131/126	1.009	21	1.118		129/127	1.154	21	[1.121]		130/127	1.337	21	[1.059]		131/127	1.241	21	1.113	*	129/128	0.899	21	1.132	*	130/128	1.041
1188	gi|53127137	hypothetical protein RCJMB04_1j7 [Gallus gallus]	593	33706	29	25	10	9	22.1	3.84	2.08	Quantitation summary for protein	129/126	0.852	22	[1.189]		130/126	0.832	22	[1.203]		131/126	0.728	22	[1.209]		129/127	1.006	22	1.051		130/127	0.964	22	1.052	*	131/127	0.869	22	1.062	*	129/128	1.094	22	1.103	*	130/128	1.047
1189	gi|363735428	PREDICTED: uncharacterized protein LOC423963 [Gallus gallus]	593	347813	34	31	18	15	8.7	9.58	0.17	Quantitation summary for protein	129/126	0.644	33	1.058	*	130/126	0.728	33	[1.111]		131/126	1.142	33	[1.082]		129/127	1.017	33	1.059		130/127	1.127	33	1.042	*	131/127	1.822	33	1.046	*	129/128	1.409	33	[1.095]		130/128	1.559
1190	gi|53129272	hypothetical protein RCJMB04_5j4 [Gallus gallus]	593	71316	27	24	12	10	23.7	9.62	0.8	Quantitation summary for protein	129/126	0.948	25	1.078	*	130/126	1.015	25	1.119		131/126	1.015	25	[1.077]		129/127	1	25	1.06		130/127	1.049	25	1.039	*	131/127	1.081	25	1.048	*	129/128	1.023	25	[1.099]		130/128	1.072
1191	gi|50742739	PREDICTED: 40S ribosomal protein S12 [Gallus gallus]	591	18830	38	24	9	6	65.9	6.81	4.17	Quantitation summary for protein	129/126	1.292	26	[1.182]		130/126	1.264	26	[1.501]		131/126	1.344	26	[1.215]		129/127	1.015	26	[1.186]		130/127	0.974	26	[1.151]		131/127	1.066	26	[1.168]		129/128	0.954	26	[1.449]		130/128	0.915
1192	gi|50754507	PREDICTED: 26S proteasome non-ATPase regulatory subunit 6 [Gallus gallus]	590	52021	26	21	10	8	27	5.87	0.85	Quantitation summary for protein	129/126	0.918	22	1.111	*	130/126	1.032	22	1.172		131/126	1.06	22	1.12	*	129/127	0.833	22	1.053	*	130/127	0.918	22	1.059	*	131/127	0.971	22	[1.051]		129/128	0.363	22	[1.163]		130/128	0.4
[truncated: 3,805 more rows]
[truncated: 8 more columns]

## Sheet: Quantified Proteins
Header	--------------------------------------------------------
Search title	Gallus TMT6plex Jan15
Timestamp	2015-02-02T05:28:37Z
[truncated: 4,294 more rows]
[truncated: 7 more columns]
