# Supplementary material for: Module 7: Multilevel Models for Binary Responses (Technical Appendix: A Primer on Estimation of Multilevel Binary Response Models)
Source: Royal Society of Chemistry journal article supplement (doi:10.1039/c9fo02861g), 2009-01-01
Supplement: c9fo02861g4.xlsx [file c9fo02861g4.xlsx]

## Sheet: Protein Summary
Header	--------------------------------------------------------
Search title	Gallus TMT6plex Jan15
Timestamp	2015-01-20T21:40:12Z
User	Sheng
Email	sz14
Report URI	http://mascot.biotech.cornell.edu/mascot/cgi/master_results.pl?file=../data/20150120/F402813.dat
Peak list data path	D:\data\20150115\Xingen10325634TMT6plexSetXJmerged.mgf
Peak list format	Mascot generic
Search type	MIS
Mascot version	2.3.02
Database	gallus
Fasta file	GallusRefSeq1Apr13.fasta
Total sequences	37321
Total residues	16201765
Sequences after taxonomy filter	37321
Number of queries	443252
Decoy	--------------------------------------------------------
			FDR %
Number of matches above identity threshold in search of real database	60135
Number of matches above identity threshold in search of decoy database	1418		2.3
Number of matches above homology threshold in search of real database	68585
Number of matches above homology threshold in search of decoy database	2769
Fixed modifications	--------------------------------------------------------
Identifier	Name	Delta	Neutral loss
1	Carbamidomethyl (C)	57.0215
2	TMT6plex (N-term)	229.163
3	TMT6plex (K)	229.163
Variable modifications	--------------------------------------------------------
Identifier	Name	Delta	Neutral loss(es)
1	Deamidated (NQ)	0.984016
2	Oxidation (M)	15.9949	0	63.9983
Search Parameters	--------------------------------------------------------
Taxonomy filter	All entries
Enzyme	Trypsin
Maximum Missed Cleavages	2
Fixed modifications	Carbamidomethyl (C),TMT6plex (N-term),TMT6plex (K)
Quantitation method	TMT 6plex_9 ratios_Yumei
Variable modifications	Deamidated (NQ),Oxidation (M)
Peptide Mass Tolerance	15
Peptide Mass Tolerance Units	ppm
Fragment Mass Tolerance	100
Fragment Mass Tolerance Units	mmu
Mass values	Monoisotopic
Instrument type	Default
Decoy database also searched	1
Format parameters	--------------------------------------------------------
Significance threshold	0.05
Max. number of hits	0
Use MudPIT protein scoring	1
Ions score cut-off	20
Include same-set proteins
Include sub-set proteins	0
Include unassigned	0
Require bold red	1
Use homology threshold	0
Group protein families	0
Re-score using Percolator	0
Protein hits	--------------------------------------------------------
prot_hit_num	prot_acc	prot_desc	prot_score	prot_mass	prot_matches	prot_matches_sig	prot_sequences	prot_sequences_sig	prot_cover	prot_pi	emPAI
1	gi|2506442	RecName: Full=Glyceraldehyde-3-phosphate dehydrogenase; Short=GAPDH; AltName: Full=Peptidyl-cysteine S-nitrosylase GAPDH	65690	42097	2736	2274	44	37	79.6	8.71	21658.2	Quantitation summary for protein	129/126	0.857	485	[1.129]		130/126	0.87	487	[1.167]		131/126	0.899	487	[1.128]		129/127	0.89	487	[1.102]		130/127	0.922	488	[1.191]		131/127	0.943	488	[1.143]		129/128	0.777	487	[1.080]		130/128	0.8
2	gi|1334725	unnamed protein product [Gallus gallus]	55662	28733	2176	1816	31	26	85.8	9.47	37077	Quantitation summary for protein	129/126	0.595	4	[1.271]		130/126	1.454	4	1.084	*	131/126	1.225	4	1.052	*	129/127	0.999	4	1.149		130/127	2.49	4	1.208	*	131/127	2.076	4	1.087	*	129/128	0.749	4	1.147	*	130/128	1.855
3	gi|63553	unnamed protein product [Gallus gallus]	47582	51091	2152	1754	37	33	71.9	6.5	1603.45	Quantitation summary for protein	129/126	0.851	1817	[1.074]		130/126	0.634	1753	[1.106]		131/126	0.811	1785	[1.072]		129/127	1.101	1818	[1.072]		130/127	0.838	1761	[1.095]		131/127	1.061	1786	[1.070]		129/128	0.999	1828	[1.048]		130/128	0.759
4	gi|125608	RecName: Full=Pyruvate kinase muscle isozyme	46543	66913	2002	1665	52	48	83.2	7.29	1200.41	Quantitation summary for protein	129/126	0.884	1752	[1.062]		130/126	0.956	1744	[1.073]		131/126	0.898	1749	[1.070]		129/127	0.889	1753	[1.054]		130/127	0.981	1744	[1.072]		131/127	0.912	1749	[1.064]		129/128	0.781	1751	[1.042]		130/128	0.856
5	gi|1616990	enolase [Gallus gallus]	35392	56045	1532	1371	37	33	61.3	7.28	189.52	Quantitation summary for protein	129/126	0.851	1335	[1.081]		130/126	0.821	1329	[1.099]		131/126	0.82	1329	[1.087]		129/127	0.89	1350	[1.070]		130/127	0.875	1340	[1.103]		131/127	0.865	1340	[1.085]		129/128	0.795	1355	[1.055]		130/128	0.777
6	gi|114305	RecName: Full=Sarcoplasmic/endoplasmic reticulum calcium ATPase 1; Short=SERCA1; Short=SR Ca(2+)-ATPase 1; AltName: Full=Calcium pump 1; AltName: Full=Calcium-transporting ATPase sarcoplasmic reticulum type, fast twitch skeletal muscle isoform; AltN	32270	123039	1375	1104	59	53	47.7	5.25	35.4	Quantitation summary for protein	129/126	0.82	622	[1.046]		130/126	0.786	619	[1.068]		131/126	0.721	612	[1.054]		129/127	0.965	619	[1.035]		130/127	0.944	617	[1.078]		131/127	0.857	612	[1.057]		129/128	1.025	619	[1.032]		130/128	0.993
7	gi|28373640	Chain B, Crystal Structure Of The Chicken Actin Trimer Complexed With Human Gelsolin Segment 1 (Gs-1)	28109	46923	1122	965	34	31	69.8	5.17	367.14	Quantitation summary for protein	129/126	0.958	148	[1.032]		130/126	1.563	148	1.036	*	131/126	1.464	148	[1.035]		129/127	2.057	145	[1.084]		130/127	3.371	145	[1.110]		131/127	3.13	145	[1.107]		129/128	1.767	147	[1.064]		130/128	2.917
8	gi|444302092	Chain A, Crystal Structure Of Smooth Muscle G Actin Dnase I Complex	22525	46546	990	839	32	29	67.4	5.24	208.94	Quantitation summary for protein	129/126	---	0	---		130/126	---	0	---		131/126	---	0	---		129/127	---	0	---		130/127	---	0	---		131/127	---	0	---		129/128	---	0	---		130/128	---
9	gi|2967678	smooth muscle gamma actin [Gallus gallus]	19702	46858	919	775	29	26	63	5.31	108.61	Quantitation summary for protein	129/126	0.865	3	1.155		130/126	1.394	3	1.056	*	131/126	1.632	3	1.148	*	129/127	2.168	3	1.082	*	130/127	3.565	3	1.276	*	131/127	4.129	3	1.305	*	129/128	1.213	3	1.283		130/128	1.982
10	gi|118099536	PREDICTED: myosin-3 [Gallus gallus]	19194	272593	774	666	131	108	59.2	5.66	9.39	Quantitation summary for protein	129/126	1.011	14	[1.089]		130/126	1.614	14	1.076	*	131/126	1.49	14	[1.092]		129/127	1.112	14	1.055	*	130/127	1.812	14	[1.113]		131/127	1.655	14	1.087	*	129/128	1.149	14	1.039	*	130/128	1.861
11	gi|136056	RecName: Full=Triosephosphate isomerase; Short=TIM; AltName: Full=Triose-phosphate isomerase	18935	32103	738	638	25	24	89.1	6.71	546.82	Quantitation summary for protein	129/126	---	0	---		130/126	---	0	---		131/126	---	0	---		129/127	---	0	---		130/127	---	0	---		131/127	---	0	---		129/128	---	0	---		130/128	---
12	gi|238274	myosin heavy chain [chickens, skeletal muscle, Peptide, 1938 aa]	17707	272157	766	652	126	102	57.6	5.61	8.49	Quantitation summary for protein	129/126	---	0	---		130/126	---	0	---		131/126	---	0	---		129/127	---	0	---		130/127	---	0	---		131/127	---	0	---		129/128	---	0	---		130/128	---
13	gi|13432175	RecName: Full=Myosin heavy chain, skeletal muscle, adult	17647	272329	754	648	126	103	58.3	5.63	8.48	Quantitation summary for protein	129/126	---	1	---		130/126	---	1	---		131/126	---	1	---		129/127	---	1	---		130/127	---	1	---		131/127	---	1	---		129/128	---	1	---		130/128	---
14	gi|63007	unnamed protein product [Gallus gallus]	17542	46734	816	692	26	23	51.3	5.3	38.82	Quantitation summary for protein	129/126	1.122	25	1.078	*	130/126	1.163	25	[1.062]		131/126	1.637	25	1.047	*	129/127	1.665	24	1.073	*	130/127	1.76	24	1.106	*	131/127	2.451	24	1.102	*	129/128	1.513	25	1.086	*	130/128	1.591
15	gi|23379831	fast myosin heavy chain HCIII [Gallus gallus]	16560	272557	664	566	113	89	52.9	5.61	6.03	Quantitation summary for protein	129/126	---	1	---		130/126	---	1	---		131/126	---	1	---		129/127	---	1	---		130/127	---	1	---		131/127	---	1	---		129/128	---	1	---		130/128	---
16	gi|86207	Ca2+-transporting ATPase (EC 3.6.3.8) SERCA2b - chicken	16306	130051	691	553	34	31	30.6	5.23	6.28	Quantitation summary for protein	129/126	0.877	25	1.07	*	130/126	1.177	25	1.033	*	131/126	0.785	25	1.053	*	129/127	0.996	25	[1.037]		130/127	1.366	24	1.037	*	131/127	0.901	24	1.032	*	129/128	1.241	24	1.031	*	130/128	1.685
17	gi|560038	PGK [Gallus gallus]	16090	55400	816	588	45	36	89.4	8.31	240.07	Quantitation summary for protein	129/126	0.905	702	[1.075]		130/126	0.796	698	[1.073]		131/126	0.756	700	[1.087]		129/127	1.016	702	[1.071]		130/127	0.912	699	[1.089]		131/127	0.857	701	[1.081]		129/128	0.854	703	[1.050]		130/128	0.762
18	gi|52695550	Chain A, Understanding Protein Lids: Structural Analysis Of Active Hinge Mutants In Triosephosphate Isomerase	14985	31812	550	478	20	20	88.7	6.49	172.87	Quantitation summary for protein	129/126	---	1	---		130/126	---	1	---		131/126	---	1	---		129/127	---	1	---		130/127	---	1	---		131/127	---	1	---		129/128	---	1	---		130/128	---
19	gi|63566	unnamed protein product [Gallus gallus]	14801	43880	786	589	36	31	78	7.75	287.61	Quantitation summary for protein	129/126	0.872	653	[1.077]		130/126	0.807	633	[1.124]		131/126	0.711	641	[1.101]		129/127	0.951	655	[1.063]		130/127	0.898	633	[1.135]		131/127	0.783	642	[1.103]		129/128	0.913	654	[1.063]		130/128	0.857
20	gi|55584149	RecName: Full=Myosin light chain 1, skeletal muscle isoform; AltName: Full=Alkali myosin light chain 1; Short=MLC-1; AltName: Full=Myosin light chain 1f; AltName: Full=Myosin light chain alkali 1; Short=Myosin light chain A1; AltName: Full=Skeletal-	14607	25755	724	594	23	22	91.7	4.96	24794.1	Quantitation summary for protein	129/126	1.163	63	[1.198]		130/126	2.083	63	[1.226]		131/126	1.776	63	[1.197]		129/127	2.976	63	[1.158]		130/127	5.441	63	[1.191]		131/127	4.59	63	[1.149]		129/128	2.563	63	[1.120]		130/128	4.658
21	gi|330417943	fructose-bisphosphate aldolase C [Gallus gallus]	14245	45006	611	501	23	21	59.6	6.2	25.05	Quantitation summary for protein	129/126	1.311	469	[1.161]		130/126	0.523	451	1.203	*	131/126	0.53	465	[1.198]		129/127	1.568	475	[1.171]		130/127	0.638	452	[1.215]		131/127	0.63	467	1.206	*	129/128	0.743	472	[1.137]		130/128	0.29
22	gi|55584150	RecName: Full=Myosin light chain 3, skeletal muscle isoform; AltName: Full=Alkali myosin light chain 3; Short=MLC-3; AltName: Full=Myosin light chain 3f; AltName: Full=Myosin light chain alkali 2; Short=Myosin light chain A2; AltName: Full=Skeletal-	14047	19506	656	536	20	19	99.3	4.52	176529	Quantitation summary for protein	129/126	---	1	---		130/126	---	1	---		131/126	---	1	---		129/127	---	1	---		130/127	---	1	---		131/127	---	1	---		129/128	---	1	---		130/128	---
23	gi|33331366	phosphoglucomutase 1 [Gallus gallus]	13681	77376	670	568	47	41	63.8	8.98	74.1	Quantitation summary for protein	129/126	0.854	602	[1.066]		130/126	0.756	601	[1.067]		131/126	0.685	602	[1.070]		129/127	1.039	602	[1.055]		130/127	0.938	601	[1.071]		131/127	0.841	602	[1.072]		129/128	0.917	602	[1.037]		130/128	0.823
24	gi|363740639	PREDICTED: myosin heavy chain, skeletal muscle, adult [Gallus gallus]	13572	272844	566	475	105	76	48.4	5.69	4.6	Quantitation summary for protein	129/126	---	1	---		130/126	---	1	---		131/126	---	1	---		129/127	---	1	---		130/127	---	1	---		131/127	---	1	---		129/128	---	1	---		130/128	---
25	gi|363735918	PREDICTED: titin [Gallus gallus]	12103	4549442	756	552	294	226	8.9	6.04	0.22	Quantitation summary for protein	129/126	1.332	331	[1.032]		130/126	1.057	331	[1.026]		131/126	1.107	331	[1.024]		129/127	0.971	334	[1.019]		130/127	0.786	332	[1.028]		131/127	0.815	333	[1.033]		129/128	0.662	334	[1.021]		130/128	0.533
26	gi|222833	M-protein [Gallus gallus]	12092	188959	498	426	68	59	49.7	5.92	6.67	Quantitation summary for protein	129/126	1.366	463	[1.032]		130/126	1.244	462	[1.038]		131/126	0.977	462	[1.031]		129/127	0.714	464	[1.030]		130/127	0.663	462	[1.049]		131/127	0.517	463	1.047	*	129/128	0.697	464	[1.022]		130/128	0.644
27	gi|53127432	hypothetical protein RCJMB04_2f16 [Gallus gallus]	11854	108525	487	372	18	14	18.3	5.97	2.92	Quantitation summary for protein	129/126	0.829	204	[1.057]		130/126	0.883	203	1.059	*	131/126	0.836	203	[1.065]		129/127	0.848	206	[1.060]		130/127	0.921	205	1.054	*	131/127	0.863	204	[1.059]		129/128	1.048	205	[1.047]		130/128	1.132
28	gi|211107	alpha-tropomyosin [Gallus gallus]	11197	41969	737	576	54	40	87.3	4.7	731.79	Quantitation summary for protein	129/126	---	0	---		130/126	---	0	---		131/126	---	0	---		129/127	---	0	---		130/127	---	0	---		131/127	---	0	---		129/128	---	0	---		130/128	---
29	gi|347800728	6-phosphofructokinase, muscle type [Gallus gallus]	10956	95826	462	381	41	39	56.1	8.33	15.28	Quantitation summary for protein	129/126	1.81	388	[1.092]		130/126	1.165	388	[1.105]		131/126	1.012	386	[1.087]		129/127	0.633	390	[1.086]		130/127	0.417	390	[1.150]		131/127	0.357	387	[1.146]		129/128	0.76	390	[1.055]		130/128	0.498
30	gi|118094283	PREDICTED: glycogen debranching enzyme [Gallus gallus]	10892	194950	524	447	80	74	53.4	6.59	8.56	Quantitation summary for protein	129/126	0.833	481	[1.027]		130/126	0.845	482	[1.040]		131/126	0.778	482	[1.033]		129/127	0.884	484	[1.025]		130/127	0.916	483	[1.042]		131/127	0.834	484	[1.034]		129/128	0.984	485	[1.017]		130/128	1.013
31	gi|53126358	hypothetical protein RCJMB04_1c14 [Gallus gallus]	10518	72717	519	420	38	31	54.6	7.4	39.82	Quantitation summary for protein	129/126	0.828	466	[1.071]		130/126	0.832	466	[1.122]		131/126	0.702	466	[1.102]		129/127	0.915	467	[1.065]		130/127	0.939	466	[1.128]		131/127	0.784	466	[1.103]		129/128	0.88	466	[1.051]		130/128	0.897
32	gi|4468189	sarcoendoplasmic reticulum calcium ATPase [Gallus gallus]	9730	128582	447	363	18	15	16.2	5.74	1.87	Quantitation summary for protein	129/126	1.923	4	1.079	*	130/126	1.785	5	1.158	*	131/126	1.006	5	[1.176]		129/127	0.863	5	[1.142]		130/127	0.923	5	[1.475]		131/127	0.515	5	1.103	*	129/128	0.658	5	[1.184]		130/128	0.7
33	gi|1212912	ryanodine receptor type 3 [Gallus gallus]	9327	631405	418	348	122	98	28	5.47	1.04	Quantitation summary for protein	129/126	1.11	346	[1.019]		130/126	0.991	344	[1.028]		131/126	0.758	344	[1.025]		129/127	0.899	349	[1.017]		130/127	0.819	345	[1.036]		131/127	0.619	345	[1.032]		129/128	1.186	348	[1.015]		130/128	1.074
34	gi|63748	preproalbumin (serum albumin) [Gallus gallus]	9061	83097	483	363	40	35	58.9	5.51	18.65	Quantitation summary for protein	129/126	1.066	411	[1.049]		130/126	0.897	411	[1.050]		131/126	1.075	411	[1.049]		129/127	0.968	411	[1.051]		130/127	0.832	411	[1.053]		131/127	0.986	411	[1.052]		129/128	1.064	411	[1.036]		130/128	0.909
35	gi|53129115	hypothetical protein RCJMB04_5g20 [Gallus gallus]	8990	32947	498	395	26	22	87.4	7.03	214.53	Quantitation summary for protein	129/126	0.711	419	[1.161]		130/126	1.081	418	[1.136]		131/126	1.076	416	[1.130]		129/127	0.935	419	[1.107]		130/127	1.451	418	[1.151]		131/127	1.429	416	[1.127]		129/128	0.975	420	[1.080]		130/128	1.505
36	gi|833620	alpha tropomyosin of fibroblasts F2 [Gallus gallus]	8805	41795	651	500	51	38	78.5	4.72	347.54	Quantitation summary for protein	129/126	---	0	---		130/126	---	0	---		131/126	---	0	---		129/127	---	0	---		130/127	---	0	---		131/127	---	0	---		129/128	---	0	---		130/128	---
37	gi|448261627	ATP synthase subunit beta, mitochondrial precursor [Gallus gallus]	8491	61692	302	277	28	26	71.9	5.44	22.72	Quantitation summary for protein	129/126	0.932	290	[1.034]		130/126	1.101	289	[1.034]		131/126	1.104	290	[1.032]		129/127	0.917	289	[1.036]		130/127	1.105	288	[1.041]		131/127	1.096	289	[1.039]		129/128	0.831	290	[1.024]		130/128	0.996
38	gi|223047	myosin L2	8326	22635	422	311	22	18	94.6	4.77	2604.89	Quantitation summary for protein	129/126	1.593	358	[1.093]		130/126	2.747	358	[1.125]		131/126	2.356	359	[1.107]		129/127	2.482	359	[1.100]		130/127	4.37	359	[1.136]		131/127	3.709	360	[1.115]		129/128	2.266	357	[1.087]		130/128	3.957
39	gi|363744981	PREDICTED: glycerol-3-phosphate dehydrogenase [NAD+], cytoplasmic-like [Gallus gallus]	8014	45243	398	333	33	32	93.1	6.47	118.65	Quantitation summary for protein	129/126	0.928	356	[1.042]		130/126	0.953	355	[1.047]		131/126	0.805	354	1.04	*	129/127	1.063	358	[1.037]		130/127	1.113	357	[1.055]		131/127	0.93	356	[1.044]		129/128	1.161	358	[1.024]		130/128	1.209
40	gi|974176	enolase [Gallus gallus]	8011	56097	330	265	30	27	72.1	6.17	26.38	Quantitation summary for protein	129/126	0.961	158	[1.110]		130/126	0.77	153	[1.097]		131/126	0.801	154	[1.092]		129/127	1.031	161	[1.101]		130/127	0.843	156	[1.102]		131/127	0.867	157	1.09	*	129/128	0.928	164	1.066	*	130/128	0.754
41	gi|27465053	alpha-tropomyosin 2 [Gallus gallus]	7609	40868	582	445	42	32	71.8	4.65	231.5	Quantitation summary for protein	129/126	---	0	---		130/126	---	0	---		131/126	---	0	---		129/127	---	0	---		130/127	---	0	---		131/127	---	0	---		129/128	---	0	---		130/128	---
42	gi|212813	tropomyosin (CTm4) [Gallus gallus]	7240	41419	506	363	47	34	73.2	4.73	158.2	Quantitation summary for protein	129/126	1.219	10	1.045	*	130/126	1.749	10	1.117	*	131/126	1.746	10	1.057	*	129/127	1.497	9	1.016	*	130/127	2.152	10	1.087	*	131/127	2.126	10	1.034	*	129/128	1.221	10	1.032	*	130/128	1.777
43	gi|211526	mitochondrial creatine kinase (EC 2.7.3.2), partial [Gallus gallus]	7024	52268	451	332	29	25	68.8	8.72	29.64	Quantitation summary for protein	129/126	1.079	329	[1.037]		130/126	1.56	324	[1.067]		131/126	1.542	326	1.053	*	129/127	1.025	329	[1.034]		130/127	1.512	324	[1.059]		131/127	1.477	327	[1.044]		129/128	1.074	328	[1.029]		130/128	1.575
44	gi|2996407	heat shock cognate 70 [Gallus gallus]	6476	83386	343	258	35	31	52.5	5.47	10.81	Quantitation summary for protein	129/126	1.087	138	[1.044]		130/126	1.162	138	[1.057]		131/126	1.117	138	[1.043]		129/127	1.007	138	[1.029]		130/127	1.1	138	[1.068]		131/127	1.045	138	[1.043]		129/128	0.986	139	[1.038]		130/128	1.07
45	gi|363745506	PREDICTED: ATP synthase subunit alpha, mitochondrial [Gallus gallus]	6262	67037	239	201	30	27	56.2	9.04	10.47	Quantitation summary for protein	129/126	0.522	40	[1.240]		130/126	0.697	40	[1.339]		131/126	0.68	40	[1.296]		129/127	0.672	40	[1.183]		130/127	0.916	40	[1.278]		131/127	0.883	40	[1.236]		129/128	0.563	40	[1.227]		130/128	0.762
46	gi|30962014	heat shock protein 70 [Gallus gallus]	5846	83160	298	222	36	28	49.1	5.66	8.42	Quantitation summary for protein	129/126	0.876	96	[1.070]		130/126	0.974	97	[1.134]		131/126	0.79	97	[1.109]		129/127	0.96	96	[1.053]		130/127	1.09	97	[1.148]		131/127	0.874	97	[1.113]		129/128	0.961	96	[1.048]		130/128	1.075
47	gi|63516	unnamed protein product [Gallus gallus]	5784	102968	222	208	32	29	45.6	5.01	4.25	Quantitation summary for protein	129/126	0.947	161	[1.033]		130/126	0.9	160	[1.035]		131/126	0.85	161	1.03	*	129/127	0.944	161	1.021	*	130/127	0.916	160	[1.045]		131/127	0.856	161	[1.036]		129/128	1.087	163	[1.028]		130/128	1.049
48	gi|363732701	PREDICTED: phosphorylase b kinase regulatory subunit alpha, skeletal muscle isoform isoform 1 [Gallus gallus]	5618	152050	267	224	54	48	42.4	6.08	3.72	Quantitation summary for protein	129/126	0.907	238	[1.026]		130/126	0.911	238	[1.035]		131/126	0.77	238	[1.031]		129/127	0.813	238	[1.023]		130/127	0.833	238	[1.041]		131/127	0.697	238	[1.036]		129/128	1.067	238	[1.019]		130/128	1.087
49	gi|136042	RecName: Full=Troponin C, skeletal muscle	5537	20941	205	172	13	12	73.6	4.05	62.92	Quantitation summary for protein	129/126	1.021	4	1.182		130/126	0.593	4	1.259	*	131/126	0.879	4	1.059	*	129/127	2.215	4	1.383	*	130/127	1.313	4	1.225		131/127	1.926	4	1.254	*	129/128	1.588	4	1.248	*	130/128	0.936
50	gi|363743097	PREDICTED: AMP deaminase 1 [Gallus gallus]	5471	98173	234	203	38	33	53.4	6.97	6.65	Quantitation summary for protein	129/126	0.84	205	[1.047]		130/126	1.165	206	[1.072]		131/126	0.828	205	[1.053]		129/127	0.792	207	[1.046]		130/127	1.12	209	[1.080]		131/127	0.788	206	[1.061]		129/128	0.797	206	1.03	*	130/128	1.12
51	gi|148921373	connectin [Gallus gallus]	5430	1082145	350	275	123	104	15.6	5.71	0.46	Quantitation summary for protein	129/126	---	1	---		130/126	---	1	---		131/126	---	1	---		129/127	---	1	---		130/127	---	1	---		131/127	---	1	---		129/128	---	1	---		130/128	---
52	gi|53126280	hypothetical protein RCJMB04_1c3 [Gallus gallus]	5164	100953	214	170	49	38	64.1	5.14	9.62	Quantitation summary for protein	129/126	1.011	186	[1.041]		130/126	1.042	184	[1.054]		131/126	1.02	186	[1.044]		129/127	1.079	187	[1.038]		130/127	1.135	184	[1.061]		131/127	1.099	185	[1.055]		129/128	0.984	188	[1.030]		130/128	1.029
53	gi|118097631	PREDICTED: heat shock 70 kDa protein 4 isoform 2 [Gallus gallus]	5151	114515	217	181	51	46	62.3	5.26	5.59	Quantitation summary for protein	129/126	1.19	190	[1.028]		130/126	1.062	187	[1.055]		131/126	0.94	189	[1.044]		129/127	1.123	190	[1.019]		130/127	1.024	187	[1.061]		131/127	0.896	190	[1.044]		129/128	1.202	190	[1.021]		130/128	1.09
54	gi|50758110	PREDICTED: malate dehydrogenase, mitochondrial [Gallus gallus]	5135	43130	174	154	25	22	81.8	8.83	30.98	Quantitation summary for protein	129/126	0.868	164	[1.090]		130/126	1.092	165	[1.079]		131/126	0.998	165	[1.088]		129/127	0.89	164	[1.066]		130/127	1.142	165	[1.105]		131/127	1.033	165	[1.076]		129/128	0.797	164	[1.061]		130/128	1.016
55	gi|83754919	Chain A, Crystal Structure Of Aluminum-Bound Ovotransferrin At 2.15 Angstrom Resolution	5061	91268	278	219	41	37	58.3	6.7	8.9	Quantitation summary for protein	129/126	---	0	---		130/126	---	0	---		131/126	---	0	---		129/127	---	0	---		130/127	---	0	---		131/127	---	0	---		129/128	---	0	---		130/128	---
56	gi|153792017	tubulin beta-3 chain [Gallus gallus]	4964	53952	215	183	17	16	46.5	4.78	16.19	Quantitation summary for protein	129/126	---	0	---		130/126	---	0	---		131/126	---	0	---		129/127	---	0	---		130/127	---	0	---		131/127	---	0	---		129/128	---	0	---		130/128	---
57	gi|8133188	voltage-dependent anion channel [Gallus gallus]	4924	36481	182	161	16	15	64.7	8.61	15.1	Quantitation summary for protein	129/126	0.866	172	[1.046]		130/126	1.056	173	[1.074]		131/126	1.049	172	[1.055]		129/127	0.879	173	[1.045]		130/127	1.096	174	[1.082]		131/127	1.076	172	[1.060]		129/128	0.809	173	[1.032]		130/128	1.003
58	gi|50982399	annexin A6 [Gallus gallus]	4917	88183	239	205	45	39	64.1	5.57	12.36	Quantitation summary for protein	129/126	0.916	54	1.043	*	130/126	0.802	54	1.078	*	131/126	0.86	52	1.05	*	129/127	1.162	53	1.036	*	130/127	0.958	53	1.077	*	131/127	1.097	53	[1.062]		129/128	1.148	54	1.048	*	130/128	1.02
59	gi|63167	unnamed protein product [Gallus gallus]	4724	53762	201	170	17	16	46.6	4.78	10.47	Quantitation summary for protein	129/126	1.074	21	1.07	*	130/126	1.05	21	1.069	*	131/126	1.074	20	1.052	*	129/127	0.833	21	1.057	*	130/127	0.831	21	1.076	*	131/127	0.841	20	1.05	*	129/128	1.316	21	1.085	*	130/128	1.306
60	gi|17225596	ATP synthase alpha subunit [Gallus gallus]	4718	67596	210	175	27	24	48.3	9.29	9.23	Quantitation summary for protein	129/126	---	1	---		130/126	---	1	---		131/126	---	1	---		129/127	---	1	---		130/127	---	1	---		131/127	---	1	---		129/128	---	1	---		130/128	---
61	gi|53133898	hypothetical protein RCJMB04_21l24 [Gallus gallus]	4715	110597	276	193	14	11	12.8	6.06	1.01	Quantitation summary for protein	129/126	0.816	9	1.073	*	130/126	0.845	10	1.085	*	131/126	0.813	10	1.093	*	129/127	0.829	9	1.029	*	130/127	0.875	10	[1.173]		131/127	0.834	10	[1.149]		129/128	0.99	10	1.047		130/128	1.039
62	gi|71274077	ovotransferrin CC type [Gallus gallus]	4703	93554	255	199	40	36	55.5	7.08	7.74	Quantitation summary for protein	129/126	---	1	---		130/126	---	1	---		131/126	---	1	---		129/127	---	1	---		130/127	---	1	---		131/127	---	1	---		129/128	---	1	---		130/128	---
63	gi|212873	vinculin [Gallus gallus]	4700	134912	214	179	58	50	53.1	6	4.47	Quantitation summary for protein	129/126	0.872	182	[1.020]		130/126	0.883	182	1.031	*	131/126	0.87	182	1.026	*	129/127	0.962	182	[1.019]		130/127	0.994	182	1.033	*	131/127	0.968	182	[1.025]		129/128	0.915	182	[1.017]		130/128	0.94
64	gi|284504914	carnosine synthase [Gallus gallus]	4666	104284	174	154	34	31	43.2	5.75	2.9	Quantitation summary for protein	129/126	1.002	162	[1.038]		130/126	1.046	161	[1.044]		131/126	0.937	162	[1.038]		129/127	0.803	162	[1.041]		130/127	0.858	161	[1.047]		131/127	0.758	162	[1.041]		129/128	0.931	162	[1.033]		130/128	0.989
65	gi|1388158	myomesin [Gallus gallus]	4654	213558	228	190	52	47	35.5	5.78	1.72	Quantitation summary for protein	129/126	1.52	208	[1.029]		130/126	1.06	208	[1.034]		131/126	1.04	208	[1.029]		129/127	0.802	208	[1.027]		130/127	0.571	208	[1.045]		131/127	0.555	208	1.04	*	129/128	0.718	208	[1.027]		130/128	0.508
66	gi|211827	78-kD glucose-regulated protein precursor [Gallus gallus]	4513	86067	188	160	29	24	46	5.12	3.14	Quantitation summary for protein	129/126	0.984	126	[1.060]		130/126	1.016	126	[1.082]		131/126	1.148	125	[1.068]		129/127	0.991	126	[1.049]		130/127	1.044	126	[1.085]		131/127	1.166	125	[1.062]		129/128	0.876	126	[1.046]		130/128	0.918
67	gi|833621	alpha tropomyosin of brain [Gallus gallus]	4465	33745	434	327	32	24	58.4	4.68	118.54	Quantitation summary for protein	129/126	---	0	---		130/126	---	0	---		131/126	---	0	---		129/127	---	0	---		130/127	---	0	---		131/127	---	0	---		129/128	---	0	---		130/128	---
68	gi|403440	unnamed protein product [Gallus gallus]	4266	103485	150	129	35	28	39	5.27	2.27	Quantitation summary for protein	129/126	0.711	131	[1.098]		130/126	0.657	130	[1.110]		131/126	0.666	131	[1.101]		129/127	0.971	131	[1.077]		130/127	0.915	130	[1.108]		131/127	0.919	131	[1.092]		129/128	0.935	132	[1.030]		130/128	0.875
69	gi|53129586	hypothetical protein RCJMB04_5n23 [Gallus gallus]	4189	34759	336	237	28	22	64.9	4.69	71.6	Quantitation summary for protein	129/126	0.952	88	[1.132]		130/126	1.689	88	[1.216]		131/126	1.579	88	[1.198]		129/127	2.865	88	1.15	*	130/127	5.188	88	[1.274]		131/127	4.801	88	[1.248]		129/128	1.838	87	[1.117]		130/128	3.259
70	gi|409191	aldolase A, partial [Gallus gallus]	4177	5126	142	134	3	3	47.6	6.95	128.02	Quantitation summary for protein	129/126	0.803	141	[1.331]		130/126	0.757	141	[1.248]		131/126	0.732	141	[1.340]		129/127	0.868	141	[1.247]		130/127	0.835	141	[1.252]		131/127	0.799	141	[1.273]		129/128	0.824	141	[1.165]		130/128	0.787
71	gi|125149	RecName: Full=Adenylate kinase isoenzyme 1; Short=AK 1; AltName: Full=ATP-AMP transphosphorylase 1; AltName: Full=Myokinase	4096	27054	235	188	20	16	61.9	8.68	57.2	Quantitation summary for protein	129/126	0.833	205	[1.065]		130/126	0.806	204	[1.088]		131/126	0.799	205	[1.078]		129/127	1.008	205	[1.066]		130/127	0.995	204	[1.089]		131/127	0.977	204	[1.077]		129/128	0.868	206	[1.046]		130/128	0.852
72	gi|1184958	elongation factor 2 [Gallus gallus]	4093	111239	223	172	45	35	48.5	6.4	4.69	Quantitation summary for protein	129/126	0.988	193	[1.041]		130/126	0.973	193	[1.050]		131/126	0.959	193	[1.041]		129/127	0.912	193	[1.038]		130/127	0.917	193	[1.054]		131/127	0.894	193	1.044	*	129/128	0.936	193	[1.029]		130/128	0.935
73	gi|76443696	voltage-dependent anion-selective channel protein 1 [Gallus gallus]	4051	36474	115	107	15	14	71.4	6.85	8.56	Quantitation summary for protein	129/126	0.943	111	[1.033]		130/126	1.052	111	[1.054]		131/126	1.117	111	1.038	*	129/127	0.901	112	[1.036]		130/127	1.026	111	[1.051]		131/127	1.078	112	[1.034]		129/128	0.847	112	1.031	*	130/128	0.96
74	gi|439403	myosin binding protein C [Gallus gallus]	3999	148285	204	148	46	36	40.5	6.18	2.62	Quantitation summary for protein	129/126	0.716	177	[1.037]		130/126	0.96	177	[1.048]		131/126	1.432	177	[1.039]		129/127	1.558	176	1.052	*	130/127	2.13	176	1.072	*	131/127	3.146	176	[1.077]		129/128	1.56	176	1.046	*	130/128	2.12
75	gi|53126523	hypothetical protein RCJMB04_1e8 [Gallus gallus]	3986	33681	163	145	17	16	71.4	4.63	15.83	Quantitation summary for protein	129/126	0.986	129	1.02	*	130/126	0.921	129	[1.034]		131/126	0.942	128	1.033	*	129/127	0.942	129	[1.020]		130/127	0.898	129	[1.034]		131/127	0.908	128	[1.028]		129/128	0.954	129	[1.022]		130/128	0.903
76	gi|363734923	PREDICTED: cytoplasmic dynein 1 heavy chain 1 [Gallus gallus]	3981	595678	208	182	66	57	15.9	6.08	0.43	Quantitation summary for protein	129/126	1.095	188	[1.017]		130/126	1.02	188	[1.029]		131/126	0.86	188	[1.022]		129/127	0.905	188	[1.015]		130/127	0.86	188	[1.033]		131/127	0.718	188	[1.026]		129/128	1.174	188	[1.014]		130/128	1.109
77	gi|113990	RecName: Full=Apolipoprotein A-I; Short=Apo-AI; Short=ApoA-I; AltName: Full=Apolipoprotein A1; Flags: Precursor	3908	36161	175	131	27	20	75.8	5.58	29.49	Quantitation summary for protein	129/126	1.911	24	1.267	*	130/126	1.321	23	1.175	*	131/126	1.629	24	1.188	*	129/127	1.73	24	[1.191]		130/127	1.221	23	1.176	*	131/127	1.489	24	[1.158]		129/128	1.77	24	[1.186]		130/128	1.241
78	gi|1763015	ubiquitin/ribosomal protein [Gallus gallus]	3896	24268	263	201	11	8	57.7	9.68	5.91	Quantitation summary for protein	129/126	1.213	21	1.132	*	130/126	0.956	21	[1.135]		131/126	1.104	21	[1.111]		129/127	1.037	21	1.126		130/127	0.852	20	1.156	*	131/127	0.954	21	1.121		129/128	1.007	21	1.098		130/128	0.805
79	gi|496325	53 kDa glycoprotein [Gallus gallus]	3885	63048	174	135	23	19	46.9	6.59	9.36	Quantitation summary for protein	129/126	0.809	145	[1.065]		130/126	1.002	145	[1.081]		131/126	0.79	145	[1.070]		129/127	0.936	145	[1.047]		130/127	1.184	145	[1.093]		131/127	0.924	145	[1.075]		129/128	0.912	145	[1.046]		130/128	1.146
80	gi|118093904	PREDICTED: glycerol-3-phosphate dehydrogenase, mitochondrial [Gallus gallus]	3838	92157	160	132	36	32	51	7.58	4.17	Quantitation summary for protein	129/126	0.876	151	[1.030]		130/126	0.886	150	[1.036]		131/126	0.87	152	[1.033]		129/127	0.847	152	[1.026]		130/127	0.876	150	[1.039]		131/127	0.851	152	[1.031]		129/128	0.82	152	[1.021]		130/128	0.842
81	gi|310772225	bridging integrator 1 [Gallus gallus]	3811	57780	159	134	27	25	79.9	4.98	10.41	Quantitation summary for protein	129/126	0.825	143	[1.037]		130/126	0.792	142	[1.042]		131/126	0.742	143	[1.040]		129/127	1.222	143	[1.037]		130/127	1.2	142	[1.047]		131/127	1.111	143	[1.041]		129/128	0.999	144	[1.029]		130/128	0.978
82	gi|50762391	PREDICTED: fructose-1,6-bisphosphatase isozyme 2 [Gallus gallus]	3780	44697	180	158	17	15	44.7	8.09	10.26	Quantitation summary for protein	129/126	1.001	165	[1.056]		130/126	1.31	165	[1.131]		131/126	1.045	165	[1.099]		129/127	1.048	165	[1.055]		130/127	1.4	165	[1.169]		131/127	1.105	165	[1.135]		129/128	0.897	165	[1.065]		130/128	1.19
83	gi|2558539	ubiquitin-ribosomal protein fusion protein [Gallus gallus]	3504	19140	239	182	7	6	46.1	9.87	3.32	Quantitation summary for protein	129/126	0.995	7	1.041		130/126	1.018	7	1.11		131/126	1.13	7	1.083	*	129/127	0.904	7	1.054	*	130/127	0.945	7	1.077		131/127	1.038	7	1.056		129/128	0.988	6	1.022		130/128	1.061
84	gi|212788	troponin Tnt-2 [Gallus gallus]	3491	39796	173	122	24	16	51.4	8.61	12.9	Quantitation summary for protein	129/126	0.753	7	1.198	*	130/126	1.062	7	1.364		131/126	1.471	7	1.296	*	129/127	2.877	6	1.633	*	130/127	4.083	6	1.235	*	131/127	5.615	6	1.184	*	129/128	1.909	7	1.374	*	130/128	2.729
85	gi|114378	RecName: Full=Sodium/potassium-transporting ATPase subunit alpha-2; Short=Na(+)/K(+) ATPase alpha-2 subunit; AltName: Full=Sodium pump subunit alpha-2	3445	125207	123	115	30	28	37.4	5.43	1.8	Quantitation summary for protein	129/126	1.101	90	[1.068]		130/126	1.265	90	[1.066]		131/126	1.385	90	[1.060]		129/127	0.923	90	[1.057]		130/127	1.082	90	[1.074]		131/127	1.172	90	[1.062]		129/128	1.191	89	[1.056]		130/128	1.39
86	gi|136393	RecName: Full=Troponin T, fast skeletal muscle isoforms	3436	40519	174	115	26	15	51.3	6.47	11.32	Quantitation summary for protein	129/126	---	1	---		130/126	---	1	---		131/126	---	1	---		129/127	---	1	---		130/127	---	1	---		131/127	---	1	---		129/128	---	1	---		130/128	---
87	gi|23821300	hexokinase1 [Gallus gallus]	3419	118742	155	129	31	27	36.2	6.32	1.88	Quantitation summary for protein	129/126	0.943	11	1.026	*	130/126	1.119	11	1.042	*	131/126	1.044	12	1.043	*	129/127	0.823	12	1.038	*	130/127	0.976	12	1.053		131/127	0.922	12	1.044	*	129/128	0.912	12	[1.030]		130/128	1.074
88	gi|53127356	hypothetical protein RCJMB04_1p19 [Gallus gallus]	3400	92147	162	145	35	30	50.2	5.72	3.82	Quantitation summary for protein	129/126	0.95	150	[1.021]		130/126	0.947	150	[1.024]		131/126	0.911	150	1.018	*	129/127	0.92	150	[1.016]		130/127	0.937	150	[1.027]		131/127	0.891	150	[1.023]		129/128	0.901	150	[1.016]		130/128	0.912
89	gi|53135040	hypothetical protein RCJMB04_24e12 [Gallus gallus]	3388	28646	144	113	16	15	82.4	6.97	64.37	Quantitation summary for protein	129/126	0.591	13	1.144	*	130/126	1.417	14	1.059	*	131/126	1.373	14	1.042	*	129/127	0.765	12	1.1	*	130/127	1.906	14	1.072	*	131/127	1.828	14	1.065	*	129/128	1.154	13	1.099	*	130/128	2.744
90	gi|53130384	hypothetical protein RCJMB04_7g5 [Gallus gallus]	3382	73480	119	103	32	28	68.9	5.72	5.84	Quantitation summary for protein	129/126	1.208	111	[1.059]		130/126	0.841	109	[1.065]		131/126	0.871	109	[1.059]		129/127	1.251	111	[1.060]		130/127	0.889	109	1.059	*	131/127	0.91	109	1.057	*	129/128	0.889	109	[1.041]		130/128	0.627
91	gi|63413	beta-globin [Gallus gallus]	3373	19148	140	128	11	11	76.2	8.85	55.82	Quantitation summary for protein	129/126	1.168	69	1.104	*	130/126	2.52	69	[1.246]		131/126	2.064	69	[1.167]		129/127	0.865	69	1.074	*	130/127	1.906	69	[1.263]		131/127	1.545	69	[1.170]		129/128	1.506	68	1.079	*	130/128	3.292
92	gi|60098993	hypothetical protein RCJMB04_18g2 [Gallus gallus]	3327	100932	153	125	28	24	37.4	6.4	2.36	Quantitation summary for protein	129/126	1.094	11	[1.063]		130/126	1.118	11	1.123	*	131/126	1.181	11	1.116	*	129/127	0.888	9	1.049	*	130/127	0.934	11	1.159		131/127	0.976	11	1.089		129/128	1.022	11	1.126		130/128	1.06
93	gi|7248371	myosin heavy chain [Gallus gallus]	3310	272314	139	122	26	20	11.6	5.62	0.53	Quantitation summary for protein	129/126	---	0	---		130/126	---	0	---		131/126	---	0	---		129/127	---	0	---		130/127	---	0	---		131/127	---	0	---		129/128	---	0	---		130/128	---
94	gi|135464	RecName: Full=Tubulin beta-3 chain; AltName: Full=Beta-tubulin class-IV	3306	53952	154	123	15	13	41.1	4.78	7.44	Quantitation summary for protein	129/126	---	0	---		130/126	---	0	---		131/126	---	0	---		129/127	---	0	---		130/127	---	0	---		131/127	---	0	---		129/128	---	0	---		130/128	---
95	gi|24637100	aconitase precursor [Gallus gallus]	3304	99827	135	118	30	25	43.9	8.05	3.56	Quantitation summary for protein	129/126	0.818	129	1.037	*	130/126	1.055	126	[1.070]		131/126	0.978	129	[1.050]		129/127	0.885	129	[1.034]		130/127	1.164	126	[1.078]		131/127	1.067	129	1.059	*	129/128	0.922	129	[1.028]		130/128	1.208
96	gi|126751	RecName: Full=Myristoylated alanine-rich C-kinase substrate; Short=MARCKS	3231	34129	97	92	15	15	77.6	4.48	7.47	Quantitation summary for protein	129/126	0.892	89	[1.054]		130/126	0.658	85	[1.093]		131/126	0.657	88	[1.058]		129/127	0.848	89	[1.048]		130/127	0.639	86	[1.086]		131/127	0.63	88	[1.062]		129/128	0.927	89	[1.047]		130/128	0.696
97	gi|44969706	chaperonin subunit 8 theta [Gallus gallus]	3218	69871	114	103	23	22	42	5.35	3.56	Quantitation summary for protein	129/126	0.903	107	1.015	*	130/126	0.988	108	[1.026]		131/126	0.954	108	[1.023]		129/127	0.876	108	[1.014]		130/127	0.972	108	[1.029]		131/127	0.929	108	[1.024]		129/128	0.931	108	1.014	*	130/128	1.027
98	gi|63014	alpha-A globin [Gallus gallus]	3217	18512	161	136	10	8	66.2	8.54	45.71	Quantitation summary for protein	129/126	1.235	32	[1.059]		130/126	1.326	32	[1.068]		131/126	1.214	32	[1.053]		129/127	1.11	32	1.046	*	130/127	1.217	32	[1.077]		131/127	1.102	32	1.043	*	129/128	1.238	32	1.045	*	130/128	1.348
99	gi|211497	calsequestrin, partial [Gallus gallus]	3212	51964	139	121	15	12	40.6	4	4.26	Quantitation summary for protein	129/126	1.273	127	[1.106]		130/126	0.879	125	[1.164]		131/126	0.831	125	[1.144]		129/127	0.777	127	[1.079]		130/127	0.548	126	[1.157]		131/127	0.511	125	[1.130]		129/128	0.688	127	[1.065]		130/128	0.482
100	gi|53127434	hypothetical protein RCJMB04_2f21 [Gallus gallus]	3204	140670	169	141	35	30	32.6	6.51	2.23	Quantitation summary for protein	129/126	1.018	152	[1.039]		130/126	0.998	152	[1.048]		131/126	0.812	152	[1.038]		129/127	0.792	152	[1.032]		130/127	0.793	152	[1.061]		131/127	0.638	152	[1.049]		129/128	1.083	151	1.023	*	130/128	1.077
101	gi|53130600	hypothetical protein RCJMB04_8o6 [Gallus gallus]	3202	67023	117	108	23	22	51.4	8.41	3.85	Quantitation summary for protein	129/126	0.888	17	1.056	*	130/126	1.039	18	[1.106]		131/126	0.966	18	[1.081]		129/127	0.859	18	1.07	*	130/127	1.03	18	[1.132]		131/127	0.947	18	[1.056]		129/128	0.893	18	1.058	*	130/128	1.064
102	gi|135469	RecName: Full=Tubulin beta-5 chain; AltName: Full=Beta-tubulin class-V	3139	54062	136	116	9	8	23.1	4.79	4.56	Quantitation summary for protein	129/126	1.048	8	1.079		130/126	1.247	9	1.084	*	131/126	1.107	9	1.085	*	129/127	0.957	9	1.061		130/127	1.218	9	1.078	*	131/127	1.07	9	1.077	*	129/128	1.281	9	1.076	*	130/128	1.62
103	gi|119359	RecName: Full=Endoplasmin; AltName: Full=Heat shock 108 kDa protein; Short=HSP 108; Short=HSP108; AltName: Full=Heat shock protein 90 kDa beta member 1; AltName: Full=Transferrin-binding protein; Flags: Precursor	3108	110517	140	119	38	32	46	4.83	3.43	Quantitation summary for protein	129/126	0.717	7	1.113	*	130/126	0.702	7	1.108	*	131/126	1.019	7	1.139		129/127	0.655	7	1.093	*	130/127	0.655	7	1.098	*	131/127	0.94	7	1.117		129/128	0.69	7	1.06	*	130/128	0.685
104	gi|53133714	hypothetical protein RCJMB04_19j12 [Gallus gallus]	3102	127764	124	108	25	24	26.5	6.56	1.48	Quantitation summary for protein	129/126	0.934	96	1.032	*	130/126	1.11	97	[1.063]		131/126	1.022	97	1.044	*	129/127	0.902	97	[1.034]		130/127	1.095	97	1.07	*	131/127	0.997	97	[1.054]		129/128	1.017	97	1.025	*	130/128	1.225
105	gi|118104602	PREDICTED: alpha-aminoadipic semialdehyde dehydrogenase isoform 2 [Gallus gallus]	3034	64947	117	102	21	20	45.3	7.04	3.4	Quantitation summary for protein	129/126	1.113	109	[1.027]		130/126	1.197	109	[1.035]		131/126	1.331	109	[1.030]		129/127	1.015	109	[1.020]		130/127	1.114	109	[1.040]		131/127	1.226	109	[1.033]		129/128	1.034	109	1.019	*	130/128	1.127
106	gi|211386	calmodulin [Gallus gallus]	3012	18889	123	107	12	11	59.1	4.09	30.52	Quantitation summary for protein	129/126	---	0	---		130/126	---	0	---		131/126	---	0	---		129/127	---	0	---		130/127	---	0	---		131/127	---	0	---		129/128	---	0	---		130/128	---
107	gi|63417	alpha-globin [Gallus gallus]	3005	18492	163	133	15	14	84.4	7.01	126.32	Quantitation summary for protein	129/126	1.17	119	[1.079]		130/126	1.517	119	[1.113]		131/126	1.613	119	[1.101]		129/127	0.877	119	[1.054]		130/127	1.16	119	[1.103]		131/127	1.22	119	[1.085]		129/128	1.171	119	[1.049]		130/128	1.54
108	gi|62738073	Chain A, Chicken Calmodulin	2995	18512	123	107	12	11	65.5	4.04	32.44	Quantitation summary for protein	129/126	1.277	2	1.191		130/126	0.899	2	1.143		131/126	1.022	2	1.046		129/127	0.994	2	1.098		130/127	0.714	2	1.241		131/127	0.804	2	1.136		129/128	0.901	2	1.046		130/128	0.643
109	gi|363734951	PREDICTED: adenylosuccinate synthetase isozyme 1 A [Gallus gallus]	2948	67992	106	92	19	16	41	6.63	2.74	Quantitation summary for protein	129/126	0.863	96	[1.072]		130/126	0.777	95	[1.105]		131/126	0.796	95	[1.073]		129/127	1.039	95	[1.070]		130/127	0.955	94	[1.095]		131/127	0.965	94	1.058	*	129/128	0.909	97	1.046	*	130/128	0.829
110	gi|15341204	cgABP260 [Gallus gallus]	2886	302708	105	95	28	25	11.8	5.93	0.38	Quantitation summary for protein	129/126	1.406	86	1.029	*	130/126	1.218	88	1.033	*	131/126	1.229	88	[1.031]		129/127	0.853	88	[1.035]		130/127	0.71	88	[1.035]		131/127	0.709	88	1.048	*	129/128	1.004	88	[1.027]		130/128	0.831
111	gi|63639	myosin alkali light chain [Gallus gallus]	2883	27367	165	128	10	10	45.4	5.22	11.48	Quantitation summary for protein	129/126	0.747	28	1.048	*	130/126	4.153	28	1.161	*	131/126	0.498	28	[1.120]		129/127	1.609	28	1.106	*	130/127	9.125	28	1.28	*	131/127	1.082	28	[1.063]		129/128	0.289	28	[1.125]		130/128	1.628
112	gi|50729975	PREDICTED: SH3 domain-binding glutamic acid-rich protein [Gallus gallus]	2850	24367	113	99	14	13	69.6	4.28	30.96	Quantitation summary for protein	129/126	0.873	102	1.044	*	130/126	0.841	102	[1.065]		131/126	0.957	101	1.043	*	129/127	0.847	101	[1.054]		130/127	0.832	102	[1.074]		131/127	0.938	101	1.055	*	129/128	0.809	102	1.045	*	130/128	0.792
113	gi|363743392	PREDICTED: alpha-2-macroglobulin-like protein 1-like [Gallus gallus]	2848	180603	140	107	38	29	28.3	5.92	1.2	Quantitation summary for protein	129/126	2.917	117	[1.068]		130/126	1.685	117	1.05	*	131/126	3.388	117	[1.067]		129/127	2.479	117	[1.060]		130/127	1.46	116	1.048	*	131/127	2.908	117	[1.063]		129/128	2.12	117	[1.045]		130/128	1.242
114	gi|22506897	UDP-glucose pyrophosphorylase [Gallus gallus]	2845	67058	103	96	23	21	47	8.41	3.85	Quantitation summary for protein	129/126	0.951	4	1.013	*	130/126	0.947	5	1.024	*	131/126	1.019	5	1.034		129/127	0.913	4	1.01	*	130/127	0.964	5	1.023	*	131/127	1.026	5	1.048		129/128	0.9	5	1.033	*	130/128	0.938
115	gi|211095	adynylosuccinate lyase [Gallus gallus]	2844	58568	109	94	19	18	47.7	6.9	2.92	Quantitation summary for protein	129/126	1.004	107	[1.044]		130/126	0.895	107	[1.086]		131/126	0.732	107	[1.061]		129/127	1.126	107	[1.038]		130/127	1.024	107	[1.091]		131/127	0.828	107	[1.062]		129/128	1.071	107	[1.025]		130/128	0.968
116	gi|63524	unnamed protein product [Gallus gallus]	2839	58129	104	80	13	12	30.6	6.84	1.55	Quantitation summary for protein	129/126	2.278	68	[1.184]		130/126	1.071	68	[1.132]		131/126	2.226	68	[1.186]		129/127	2.954	68	[1.245]		130/127	1.418	68	[1.152]		131/127	2.915	68	[1.233]		129/128	2.094	68	[1.159]		130/128	0.999
117	gi|63031	alpha-actinin [Gallus gallus]	2821	117154	134	102	33	30	42.4	5.26	2.27	Quantitation summary for protein	129/126	0.811	92	[1.032]		130/126	0.897	92	1.028	*	131/126	1.109	92	[1.025]		129/127	1.258	91	1.031	*	130/127	1.414	92	[1.043]		131/127	1.73	92	[1.051]		129/128	1.155	92	[1.023]		130/128	1.296
118	gi|63739	prolyl-4-hydroxylase (AA 5 - 494) [Gallus gallus]	2808	65486	139	122	27	20	50.6	4.66	3.79	Quantitation summary for protein	129/126	0.936	126	[1.020]		130/126	0.782	126	[1.028]		131/126	0.961	126	[1.023]		129/127	0.901	126	[1.019]		130/127	0.768	126	1.028	*	131/127	0.934	126	1.019	*	129/128	0.914	126	[1.015]		130/128	0.774
119	gi|65332	carbonic anhydrase [Gallus gallus]	2800	33284	83	81	10	10	53.1	6.56	3.57	Quantitation summary for protein	129/126	0.96	55	1.05	*	130/126	1.039	55	[1.052]		131/126	0.864	55	[1.046]		129/127	1.27	55	[1.039]		130/127	1.403	55	[1.073]		131/127	1.155	55	[1.061]		129/128	1.042	55	1.04	*	130/128	1.144
120	gi|755815	complement C3 precursor [Gallus gallus]	2780	210718	155	137	39	35	24	6.69	1	Quantitation summary for protein	129/126	1.667	117	[1.036]		130/126	1.234	117	1.023	*	131/126	1.767	116	1.029	*	129/127	1.431	118	[1.026]		130/127	1.081	118	[1.027]		131/127	1.529	118	1.029	*	129/128	1.42	118	1.023	*	130/128	1.066
121	gi|53127346	hypothetical protein RCJMB04_1o16 [Gallus gallus]	2733	92937	97	84	20	18	29.6	5.68	1.22	Quantitation summary for protein	129/126	0.976	92	[1.022]		130/126	0.855	92	[1.050]		131/126	0.847	92	[1.035]		129/127	1.05	93	1.023	*	130/127	0.939	93	[1.054]		131/127	0.92	93	[1.041]		129/128	1.044	93	[1.021]		130/128	0.927
122	gi|363736263	PREDICTED: tubulin alpha-4A chain-like [Gallus gallus]	2716	57484	118	102	15	13	36.5	5.09	3.49	Quantitation summary for protein	129/126	1.308	19	1.042	*	130/126	0.789	20	1.115	*	131/126	0.831	20	1.077	*	129/127	1.053	20	1.036	*	130/127	0.654	20	[1.130]		131/127	0.681	20	[1.091]		129/128	1.305	20	1.046	*	130/128	0.805
123	gi|363736047	PREDICTED: nebulin [Gallus gallus]	2688	968318	151	115	47	35	6.8	9.1	0.15	Quantitation summary for protein	129/126	1.137	123	[1.020]		130/126	0.952	123	[1.024]		131/126	1.094	123	[1.021]		129/127	1.231	123	[1.020]		130/127	1.052	123	[1.026]		131/127	1.196	123	[1.034]		129/128	0.491	123	[1.052]		130/128	0.417
124	gi|363744022	PREDICTED: uncharacterized protein LOC427177 [Gallus gallus]	2665	564737	121	101	40	33	9.7	4.68	0.25	Quantitation summary for protein	129/126	1.43	104	[1.030]		130/126	1.267	104	[1.035]		131/126	1.334	104	1.028	*	129/127	0.871	104	[1.028]		130/127	0.787	104	[1.041]		131/127	0.82	104	[1.043]		129/128	0.873	104	1.021	*	130/128	0.785
125	gi|136089	RecName: Full=Tropomyosin beta chain; AltName: Full=Beta-tropomyosin; AltName: Full=Tropomyosin-2	2663	42037	237	142	37	27	71.1	4.69	39.69	Quantitation summary for protein	129/126	0.124	5	1.63	*	130/126	0.591	5	1.132	*	131/126	0.188	5	1.557	*	129/127	1.458	5	1.102	*	130/127	7.098	5	1.621	*	131/127	2.276	4	1.112	*	129/128	1.472	5	1.151	*	130/128	7.122
126	gi|363738749	PREDICTED: cullin-associated NEDD8-dissociated protein 1 isoform 2 [Gallus gallus]	2642	159560	104	94	28	25	23.9	5.88	1.07	Quantitation summary for protein	129/126	0.881	74	1.03	*	130/126	0.938	74	[1.028]		131/126	0.765	74	[1.028]		129/127	0.908	74	[1.031]		130/127	0.986	74	[1.054]		131/127	0.796	74	[1.049]		129/128	1.129	74	[1.022]		130/128	1.219
127	gi|22651801	glucose regulated thiol oxidoreductase protein precursor [Gallus gallus]	2638	68462	102	93	23	22	48.5	5.76	2.71	Quantitation summary for protein	129/126	0.954	99	[1.027]		130/126	0.875	99	[1.041]		131/126	1.019	99	[1.029]		129/127	0.961	99	[1.020]		130/127	0.9	99	[1.046]		131/127	1.037	99	[1.030]		129/128	1.007	99	1.018	*	130/128	0.936
128	gi|60098559	hypothetical protein RCJMB04_3m3 [Gallus gallus]	2629	67591	100	85	27	24	54.6	5.89	4.52	Quantitation summary for protein	129/126	0.982	93	[1.035]		130/126	0.902	93	[1.043]		131/126	0.932	93	[1.040]		129/127	0.937	93	[1.039]		130/127	0.879	93	[1.042]		131/127	0.898	93	[1.039]		129/128	0.95	93	[1.022]		130/128	0.885
129	gi|53127632	hypothetical protein RCJMB04_2m8 [Gallus gallus]	2612	85807	128	95	31	24	45	6.09	3.16	Quantitation summary for protein	129/126	0.939	107	1.041	*	130/126	1.041	107	1.064	*	131/126	1.03	107	1.056	*	129/127	0.889	107	[1.035]		130/127	1.005	107	[1.074]		131/127	0.985	107	[1.064]		129/128	0.941	107	[1.033]		130/128	1.058
130	gi|118098350	PREDICTED: cytochrome b-c1 complex subunit 2, mitochondrial-like [Gallus gallus]	2607	55194	85	76	15	14	35.7	9.04	3.02	Quantitation summary for protein	129/126	0.907	83	1.036	*	130/126	0.991	83	[1.035]		131/126	0.967	83	[1.034]		129/127	0.92	83	[1.035]		130/127	1.026	83	[1.034]		131/127	0.991	83	[1.036]		129/128	0.813	83	[1.033]		130/128	0.901
131	gi|53131091	hypothetical protein RCJMB04_11d4 [Gallus gallus]	2601	116432	99	89	24	22	27.5	5.68	1.05	Quantitation summary for protein	129/126	1.068	95	[1.020]		130/126	0.922	95	1.028	*	131/126	0.912	95	[1.025]		129/127	0.89	95	[1.016]		130/127	0.784	95	1.033	*	131/127	0.767	95	[1.028]		129/128	1.284	95	[1.018]		130/128	1.124
132	gi|212807	alpha-tropomyosin (smooth muscle) [Gallus gallus]	2575	40911	237	142	36	26	70.1	4.68	37.43	Quantitation summary for protein	129/126	---	0	---		130/126	---	0	---		131/126	---	0	---		129/127	---	0	---		130/127	---	0	---		131/127	---	0	---		129/128	---	0	---		130/128	---
133	gi|3645997	apolipoprotein AIV [Gallus gallus]	2538	44495	89	84	21	20	62.8	4.8	4.98	Quantitation summary for protein	129/126	1.077	85	[1.043]		130/126	1.002	85	[1.061]		131/126	1.325	85	[1.055]		129/127	1.152	85	[1.037]		130/127	1.094	85	[1.067]		131/127	1.432	85	[1.054]		129/128	1.191	85	[1.029]		130/128	1.124
134	gi|118102324	PREDICTED: immunoglobulin-like and fibronectin type III domain-containing protein 1-like [Gallus gallus]	2527	110211	138	117	38	32	48.4	8.85	2.73	Quantitation summary for protein	129/126	1.956	54	[1.090]		130/126	1.766	54	1.069	*	131/126	1.511	54	1.062	*	129/127	0.751	55	1.038	*	130/127	0.692	54	[1.084]		131/127	0.586	54	[1.080]		129/128	0.846	54	[1.032]		130/128	0.775
135	gi|363745438	PREDICTED: puromycin-sensitive aminopeptidase [Gallus gallus]	2505	108581	119	105	31	29	38.7	5.03	1.91	Quantitation summary for protein	129/126	0.861	58	[1.038]		130/126	0.784	58	1.049	*	131/126	0.7	58	1.041	*	129/127	1.117	58	[1.049]		130/127	1.039	58	1.053	*	131/127	0.918	58	[1.038]		129/128	1.057	58	[1.031]		130/128	0.977
136	gi|134800	RecName: Full=Spectrin alpha chain, non-erythrocytic 1; AltName: Full=Alpha-II spectrin; AltName: Full=Fodrin alpha chain	2497	331589	128	97	46	40	21.3	5.21	0.61	Quantitation summary for protein	129/126	1.162	109	[1.028]		130/126	1.081	109	[1.033]		131/126	1.195	109	[1.029]		129/127	1.164	109	[1.024]		130/127	1.105	109	[1.031]		131/127	1.208	109	[1.026]		129/128	1.183	109	1.02	*	130/128	1.116
137	gi|363735594	PREDICTED: thioredoxin-dependent peroxide reductase, mitochondrial [Gallus gallus]	2492	29238	89	84	7	7	42.3	8.58	5.27	Quantitation summary for protein	129/126	0.933	86	[1.047]		130/126	1.067	85	1.032	*	131/126	1.066	86	[1.034]		129/127	0.808	86	[1.053]		130/127	0.943	86	[1.046]		131/127	0.932	86	[1.048]		129/128	0.741	86	[1.047]		130/128	0.859
138	gi|196049775	Chain A, Chicken Cytochrome Bc1 Complex Inhibited By An Iodinated Analogue Of The Polyketide Crocacin-d	2468	54793	96	90	17	17	45.5	5.95	3.55	Quantitation summary for protein	129/126	0.956	96	[1.051]		130/126	1.057	96	[1.059]		131/126	1.026	96	[1.056]		129/127	0.986	96	[1.049]		130/127	1.113	96	[1.062]		131/127	1.068	96	[1.055]		129/128	0.935	96	[1.049]		130/128	1.049
139	gi|211114	alpha-globin-A [Gallus gallus]	2459	18700	130	105	10	7	66.2	9.1	37.7	Quantitation summary for protein	129/126	1.27	2	2.045		130/126	1.273	2	1.129		131/126	1.38	2	1.217		129/127	0.917	2	1.254		130/127	0.939	2	1.841		131/127	1.006	2	1.339		129/128	1.125	2	1.102		130/128	1.144
140	gi|53133814	hypothetical protein RCJMB04_20j17 [Gallus gallus]	2421	90005	120	103	26	22	37.4	6.5	1.92	Quantitation summary for protein	129/126	0.928	109	[1.018]		130/126	1.049	109	[1.021]		131/126	0.96	109	[1.018]		129/127	0.923	109	[1.015]		130/127	1.065	109	1.022	*	131/127	0.964	109	[1.019]		129/128	0.966	109	[1.015]		130/128	1.108
141	gi|363736202	PREDICTED: LOW QUALITY PROTEIN: calcium-binding mitochondrial carrier protein Aralar1 [Gallus gallus]	2420	84812	103	85	24	20	40.9	8.76	1.89	Quantitation summary for protein	129/126	0.982	73	1.037	*	130/126	1.156	73	[1.066]		131/126	1.005	73	[1.048]		129/127	0.962	74	[1.030]		130/127	1.156	74	1.07	*	131/127	0.994	73	[1.048]		129/128	1.002	74	1.019		130/128	1.197
142	gi|212393	myosin alkali light chain [Gallus gallus]	2405	19725	146	108	6	6	34.4	4.52	9.58	Quantitation summary for protein	129/126	1.052	123	[1.093]		130/126	3.192	123	[1.188]		131/126	2.384	123	[1.134]		129/127	2.118	123	[1.117]		130/127	6.557	123	[1.238]		131/127	4.846	123	[1.185]		129/128	2.032	123	[1.073]		130/128	6.254
143	gi|363741087	PREDICTED: protein unc-45 homolog B [Gallus gallus]	2405	125128	117	99	30	26	32.2	8.13	1.47	Quantitation summary for protein	129/126	0.824	104	[1.035]		130/126	0.864	104	[1.040]		131/126	0.737	104	1.032	*	129/127	0.946	104	[1.031]		130/127	1.014	104	[1.043]		131/127	0.855	104	1.029	*	129/128	1.248	104	1.021	*	130/128	1.329
144	gi|53130364	hypothetical protein RCJMB04_7e11 [Gallus gallus]	2403	60403	110	87	24	21	49.8	9.02	5.75	Quantitation summary for protein	129/126	0.845	93	1.03	*	130/126	1.123	93	[1.063]		131/126	1.079	93	[1.043]		129/127	0.909	93	[1.028]		130/127	1.233	93	[1.066]		131/127	1.173	93	[1.043]		129/128	0.918	93	1.026	*	130/128	1.237
145	gi|53130444	hypothetical protein RCJMB04_7o12 [Gallus gallus]	2398	58123	125	105	21	19	43.5	8.38	3.42	Quantitation summary for protein	129/126	1.01	103	[1.035]		130/126	0.788	102	1.028	*	131/126	0.792	103	[1.031]		129/127	0.959	103	[1.043]		130/127	0.765	103	1.036	*	131/127	0.76	103	[1.038]		129/128	0.902	103	[1.024]		130/128	0.715
146	gi|127759	RecName: Full=Myosin-9; AltName: Full=Cellular myosin heavy chain, type A; AltName: Full=Myosin heavy chain 9; AltName: Full=Myosin heavy chain, non-muscle IIa; AltName: Full=Non-muscle myosin heavy chain A; Short=NMMHC-A; AltName: Full=Non-muscle m	2384	275571	126	103	43	39	23.9	5.47	0.68	Quantitation summary for protein	129/126	1.037	81	[1.021]		130/126	0.659	81	1.032	*	131/126	0.815	81	[1.023]		129/127	0.859	81	[1.019]		130/127	0.557	81	[1.043]		131/127	0.682	81	[1.031]		129/128	1.028	81	[1.017]		130/128	0.663
147	gi|53128721	hypothetical protein RCJMB04_5b19 [Gallus gallus]	2375	33148	72	65	12	11	37.1	8.68	4.56	Quantitation summary for protein	129/126	0.811	23	1.088	*	130/126	1.013	23	1.058		131/126	1.025	23	1.079		129/127	0.955	23	1.063	*	130/127	1.217	23	1.07	*	131/127	1.219	23	1.078	*	129/128	0.85	23	1.084	*	130/128	1.076
148	gi|223280	tubulin alpha	2344	50613	124	99	18	15	48.4	5	7.02	Quantitation summary for protein	129/126	1.359	5	1.193	*	130/126	1.048	5	1.126		131/126	1.102	5	1.215		129/127	0.911	5	1.134		130/127	0.717	5	1.134	*	131/127	0.747	5	[1.177]		129/128	1.077	5	[1.189]		130/128	0.842
149	gi|26000436	talin [Gallus gallus]	2340	315489	104	85	42	35	18.6	5.9	0.48	Quantitation summary for protein	129/126	1.247	79	1.024	*	130/126	0.97	78	[1.040]		131/126	1.04	79	[1.029]		129/127	1.143	79	[1.024]		130/127	0.908	78	[1.044]		131/127	0.963	79	[1.028]		129/128	1.427	79	1.03	*	130/128	1.126
150	gi|112981	RecName: Full=Aspartate aminotransferase, mitochondrial; Short=mAspAT; AltName: Full=Glutamate oxaloacetate transaminase 2; AltName: Full=Kynurenine aminotransferase 4; AltName: Full=Kynurenine aminotransferase IV; AltName: Full=Kynurenine--oxogluta	2318	54142	130	96	26	22	55.3	9.38	8.42	Quantitation summary for protein	129/126	0.869	109	1.028	*	130/126	1.097	110	[1.041]		131/126	0.976	110	1.031	*	129/127	0.951	110	[1.025]		130/127	1.233	110	[1.050]		131/127	1.085	110	[1.040]		129/128	0.938	110	1.021	*	130/128	1.209
151	gi|60099069	hypothetical protein RCJMB04_22i13 [Gallus gallus]	2265	59073	84	77	21	19	47.3	6.92	3.32	Quantitation summary for protein	129/126	0.896	80	[1.053]		130/126	0.982	78	[1.069]		131/126	0.936	79	[1.059]		129/127	0.889	80	[1.057]		130/127	0.994	78	[1.070]		131/127	0.937	79	1.05	*	129/128	0.88	80	1.038	*	130/128	0.981
152	gi|363735211	PREDICTED: LIM domain-binding protein 3-like [Gallus gallus]	2243	75962	124	100	17	14	23.2	8.18	2.56	Quantitation summary for protein	129/126	1.164	110	1.066	*	130/126	1.433	110	[1.087]		131/126	1.342	110	1.08	*	129/127	1.047	110	[1.062]		130/127	1.315	110	[1.091]		131/127	1.22	110	[1.088]		129/128	0.972	110	[1.055]		130/128	1.213
153	gi|363739855	PREDICTED: aldehyde dehydrogenase, mitochondrial isoform 2 [Gallus gallus]	2232	65575	92	85	20	19	44.5	7.92	2.74	Quantitation summary for protein	129/126	0.863	77	1.051	*	130/126	0.781	77	[1.125]		131/126	0.756	77	[1.090]		129/127	0.991	77	[1.056]		130/127	0.916	77	[1.118]		131/127	0.877	77	[1.081]		129/128	0.85	77	[1.034]		130/128	0.781
154	gi|66361199	Chain I, Crystal Structure Of Skeletal Muscle Troponin In The Ca2+- Activated State	2230	27245	151	103	20	15	64.8	9.33	24.49	Quantitation summary for protein	129/126	0.553	2	1.314		130/126	1.069	2	1.363		131/126	1.006	2	1.468		129/127	2.44	2	1.04	*	130/127	4.816	2	1.078	*	131/127	4.487	2	1.161	*	129/128	1.423	2	1.276		130/128	2.793
155	gi|642960	troponin I [Gallus gallus]	2213	27523	150	103	19	15	63.9	9.19	20.89	Quantitation summary for protein	129/126	---	1	---		130/126	---	1	---		131/126	---	1	---		129/127	---	1	---		130/127	---	1	---		131/127	---	1	---		129/128	---	1	---		130/128	---
156	gi|53127484	hypothetical protein RCJMB04_2j13 [Gallus gallus]	2210	56593	97	80	19	17	46.9	5.72	2.67	Quantitation summary for protein	129/126	1.088	84	[1.022]		130/126	1.034	84	1.021	*	131/126	1.049	84	[1.020]		129/127	1.01	84	1.018	*	130/127	0.98	84	1.026	*	131/127	0.984	84	[1.025]		129/128	1.063	84	1.017	*	130/128	1.025
157	gi|118098276	PREDICTED: uncharacterized protein LOC770260 [Gallus gallus]	2199	16505	83	77	6	5	57.3	6.21	5.44	Quantitation summary for protein	129/126	0.781	81	[1.051]		130/126	0.983	81	1.06	*	131/126	0.822	81	[1.066]		129/127	0.779	81	1.052	*	130/127	1	81	[1.065]		131/127	0.828	81	[1.057]		129/128	1.008	81	1.039		130/128	1.287
158	gi|65322	heat shock protein 90 beta [Gallus gallus]	2186	101134	88	80	17	16	24	4.95	1.22	Quantitation summary for protein	129/126	0.95	27	1.126	*	130/126	0.958	27	1.085	*	131/126	0.888	25	1.083	*	129/127	0.907	27	1.196	*	130/127	0.933	27	1.102	*	131/127	0.853	27	1.171	*	129/128	1.166	27	1.132	*	130/128	1.192
159	gi|206597434	collagen alpha-2(I) chain precursor [Gallus gallus]	2181	141617	76	68	14	14	12.8	9.23	0.54	Quantitation summary for protein	129/126	1.62	73	1.107	*	130/126	1.69	73	1.144	*	131/126	4.5	73	[1.314]		129/127	1.681	74	1.108	*	130/127	1.795	73	[1.144]		131/127	4.706	74	1.309	*	129/128	1.52	74	1.107	*	130/128	1.615
160	gi|363736265	PREDICTED: tubulin alpha-5 chain-like [Gallus gallus]	2173	56335	125	102	18	15	43.4	4.95	5.14	Quantitation summary for protein	129/126	---	0	---		130/126	---	0	---		131/126	---	0	---		129/127	---	0	---		130/127	---	0	---		131/127	---	0	---		129/128	---	0	---		130/128	---
161	gi|61611929	visfatin [Gallus gallus]	2142	67124	62	58	14	14	35.9	6.66	1.73	Quantitation summary for protein	129/126	1.08	60	[1.042]		130/126	0.891	60	[1.073]		131/126	1.038	60	1.04	*	129/127	1.132	60	1.039	*	130/127	0.953	60	[1.086]		131/127	1.099	60	1.048	*	129/128	1.182	60	1.036	*	130/128	0.989
162	gi|63066	unnamed protein product [Gallus gallus]	2100	51176	91	73	20	17	47.6	8.22	4.39	Quantitation summary for protein	129/126	0.825	79	[1.064]		130/126	0.866	79	[1.076]		131/126	0.827	79	[1.058]		129/127	1.061	79	[1.054]		130/127	1.138	79	[1.092]		131/127	1.075	79	[1.084]		129/128	0.98	79	[1.047]		130/128	1.045
163	gi|60098399	hypothetical protein RCJMB04_1j11 [Gallus gallus]	2073	64631	65	59	16	13	33.1	6.57	1.32	Quantitation summary for protein	129/126	1.154	62	[1.022]		130/126	0.904	62	[1.027]		131/126	1.06	62	[1.026]		129/127	1.037	62	[1.022]		130/127	0.828	62	1.039	*	131/127	0.962	62	[1.033]		129/128	1.071	62	[1.022]		130/128	0.85
164	gi|50752600	PREDICTED: tubulin alpha-3 chain [Gallus gallus]	2044	55295	111	91	15	12	35.3	4.94	3.77	Quantitation summary for protein	129/126	---	0	---		130/126	---	0	---		131/126	---	0	---		129/127	---	0	---		130/127	---	0	---		131/127	---	0	---		129/128	---	0	---		130/128	---
165	gi|363741727	PREDICTED: adenosylhomocysteinase A [Gallus gallus]	2039	101341	66	59	14	13	16.6	9.71	0.77	Quantitation summary for protein	129/126	1.048	62	[1.029]		130/126	0.878	62	[1.030]		131/126	0.915	62	1.028	*	129/127	1.088	62	[1.032]		130/127	0.93	62	[1.033]		131/127	0.959	62	1.03	*	129/128	1.054	62	1.022	*	130/128	0.895
166	gi|363729877	PREDICTED: obscurin [Gallus gallus]	2036	1359678	141	107	54	41	5.6	5.62	0.13	Quantitation summary for protein	129/126	1.522	108	[1.035]		130/126	1.216	108	1.022	*	131/126	1.267	108	[1.022]		129/127	0.957	108	[1.028]		130/127	0.781	108	[1.035]		131/127	0.805	108	1.036	*	129/128	0.709	108	1.022	*	130/128	0.575
167	gi|2737971	CFR-associated protein p70 [Gallus gallus]	2034	98713	90	77	23	20	35.1	9.19	2.03	Quantitation summary for protein	129/126	1.068	83	[1.053]		130/126	1.143	83	[1.056]		131/126	1.17	83	[1.050]		129/127	1.095	83	[1.051]		130/127	1.196	83	[1.075]		131/127	1.212	83	[1.062]		129/128	1.09	83	1.035	*	130/128	1.183
168	gi|63359	cytochrome C [Gallus gallus]	1986	16171	86	82	8	7	61.9	9.52	43.6	Quantitation summary for protein	129/126	0.897	84	1.066	*	130/126	1.202	84	[1.156]		131/126	1.072	84	1.107	*	129/127	0.955	84	1.058	*	130/127	1.307	84	[1.167]		131/127	1.152	84	[1.115]		129/128	0.85	84	1.049	*	130/128	1.156
169	gi|53130129	hypothetical protein RCJMB04_6h13 [Gallus gallus]	1964	47236	64	60	10	10	28.3	5.07	1.57	Quantitation summary for protein	129/126	0.842	63	1.027	*	130/126	0.883	64	[1.045]		131/126	0.881	63	1.033	*	129/127	0.909	64	1.029	*	130/127	0.974	64	[1.058]		131/127	0.963	64	1.039	*	129/128	0.977	64	[1.026]		130/128	1.041
170	gi|53133788	hypothetical protein RCJMB04_20e18 [Gallus gallus]	1953	113465	82	66	27	25	32.4	6.03	1.56	Quantitation summary for protein	129/126	0.919	68	[1.028]		130/126	0.76	68	[1.035]		131/126	0.746	68	1.035	*	129/127	0.978	68	[1.023]		130/127	0.825	68	[1.034]		131/127	0.801	68	1.034	*	129/128	1.178	68	[1.030]		130/128	0.988
171	gi|21435808	translational eukaryotic inititation factor 4AII [Gallus gallus]	1907	51841	108	80	24	20	52.6	5.33	6.64	Quantitation summary for protein	129/126	1.045	78	[1.070]		130/126	0.966	78	[1.070]		131/126	0.958	78	1.06	*	129/127	0.962	78	[1.050]		130/127	0.908	78	[1.080]		131/127	0.891	78	[1.068]		129/128	0.931	79	[1.038]		130/128	0.873
172	gi|3420726	Rab-GDP dissociation inhibitor [Gallus gallus]	1898	58669	84	75	17	15	46.4	5.23	2.32	Quantitation summary for protein	129/126	0.869	78	[1.046]		130/126	0.705	76	1.061	*	131/126	0.708	78	1.05	*	129/127	1.046	78	[1.041]		130/127	0.881	77	[1.079]		131/127	0.861	78	[1.063]		129/128	1.113	78	[1.037]		130/128	0.932
173	gi|6179570	radixin [Gallus gallus]	1893	83522	121	91	32	27	42.5	6.11	3.49	Quantitation summary for protein	129/126	1.208	60	[1.031]		130/126	0.996	59	1.03		131/126	0.969	60	[1.028]		129/127	1.231	59	[1.024]		130/127	1.065	59	[1.040]		131/127	0.997	59	[1.034]		129/128	1.036	60	1.02	*	130/128	0.89
174	gi|118082834	PREDICTED: mitochondrial 10-formyltetrahydrofolate dehydrogenase [Gallus gallus]	1892	118992	89	80	31	30	37.2	6.5	1.58	Quantitation summary for protein	129/126	1.124	86	[1.036]		130/126	0.88	85	[1.069]		131/126	0.916	85	[1.050]		129/127	1.238	85	[1.050]		130/127	0.989	85	[1.065]		131/127	1.018	85	[1.043]		129/128	1.023	85	1.021	*	130/128	0.811
175	gi|74048411	eukaryotic translation elongation factor 1 alpha 2 [Gallus gallus]	1892	61579	132	112	18	15	41.5	9.11	6.21	Quantitation summary for protein	129/126	0.99	89	[1.067]		130/126	1.02	88	[1.063]		131/126	0.982	86	[1.060]		129/127	1.038	89	[1.075]		130/127	1.092	88	1.064	*	131/127	1.042	86	1.059	*	129/128	0.965	90	[1.048]		130/128	1.009
176	gi|53127778	hypothetical protein RCJMB04_3f20 [Gallus gallus]	1887	55749	100	80	22	19	51.3	8.1	3.99	Quantitation summary for protein	129/126	1.125	93	[1.048]		130/126	0.664	93	[1.061]		131/126	0.715	93	1.044	*	129/127	1.231	93	[1.046]		130/127	0.741	93	[1.062]		131/127	0.79	93	[1.046]		129/128	0.827	93	[1.027]		130/128	0.495
177	gi|53133756	hypothetical protein RCJMB04_20b9 [Gallus gallus]	1887	218646	142	105	35	28	20.4	7.86	0.65	Quantitation summary for protein	129/126	1.04	127	[1.018]		130/126	0.973	127	[1.033]		131/126	0.898	127	[1.027]		129/127	0.872	127	[1.018]		130/127	0.833	127	[1.039]		131/127	0.76	127	[1.031]		129/128	1.02	127	[1.015]		130/128	0.968
178	gi|118099965	PREDICTED: ATP synthase subunit d, mitochondrial isoform 1 [Gallus gallus]	1887	21998	69	63	11	10	68.9	8.73	13.85	Quantitation summary for protein	129/126	0.898	68	[1.065]		130/126	1.118	68	[1.148]		131/126	1.025	68	[1.058]		129/127	0.857	68	[1.053]		130/127	1.09	68	[1.134]		131/127	0.992	67	1.037		129/128	0.772	68	1.057	*	130/128	0.975
179	gi|459642346	reticulon-4 [Gallus gallus]	1880	25960	73	64	5	5	29.1	9.18	2.78	Quantitation summary for protein	129/126	0.841	2	1.153		130/126	0.792	2	1.206		131/126	0.76	2	1.089		129/127	1.106	2	1.29		130/127	1.062	2	1.078		131/127	1.009	2	1.027		129/128	0.833	2	1.043		130/128	0.795
180	gi|363744134	PREDICTED: NAD(P) transhydrogenase, mitochondrial [Gallus gallus]	1880	128082	85	66	27	23	28.5	6.97	1.08	Quantitation summary for protein	129/126	1.012	79	1.024	*	130/126	1.265	80	[1.028]		131/126	1.001	80	1.024		129/127	1.04	80	[1.022]		130/127	1.323	80	1.033	*	131/127	1.036	80	1.027	*	129/128	1.091	80	[1.024]		130/128	1.379
181	gi|63370	unnamed protein product [Gallus gallus]	1874	494792	97	76	37	30	11.7	5.79	0.29	Quantitation summary for protein	129/126	1.358	84	[1.035]		130/126	1.074	84	[1.028]		131/126	1.338	84	[1.030]		129/127	1.193	84	1.022	*	130/127	0.964	84	[1.034]		131/127	1.187	84	1.029	*	129/128	1.06	84	1.019	*	130/128	0.851
182	gi|56791762	NOGO isoform A2 [Gallus gallus]	1872	135405	72	63	5	4	6.4	4.54	0.3	Quantitation summary for protein	129/126	---	1	---		130/126	---	1	---		131/126	---	1	---		129/127	---	1	---		130/127	---	1	---		131/127	---	1	---		129/128	---	1	---		130/128	---
183	gi|118102310	PREDICTED: tubulin alpha-1C chain [Gallus gallus]	1855	55293	97	83	16	14	40.7	5.01	3.77	Quantitation summary for protein	129/126	1.091	6	1.054	*	130/126	1.261	6	[1.226]		131/126	1.141	6	[1.115]		129/127	0.85	6	1.08	*	130/127	1.002	6	[1.288]		131/127	0.897	6	1.145		129/128	1.171	6	1.077	*	130/128	1.372
184	gi|53127436	hypothetical protein RCJMB04_2g5 [Gallus gallus]	1849	44082	115	81	21	15	46.1	6.92	7.74	Quantitation summary for protein	129/126	0.833	97	1.091	*	130/126	0.971	97	[1.122]		131/126	0.859	98	1.091	*	129/127	1.026	98	[1.064]		130/127	1.221	97	[1.127]		131/127	1.068	98	1.095	*	129/128	0.924	96	1.057	*	130/128	1.091
185	gi|53127458	hypothetical protein RCJMB04_2i3 [Gallus gallus]	1847	32633	90	66	15	13	56.7	4.68	9.23	Quantitation summary for protein	129/126	1.038	33	[1.053]		130/126	1.022	33	[1.078]		131/126	1.062	33	[1.050]		129/127	1.013	33	[1.038]		130/127	1.041	32	1.063	*	131/127	1.047	33	1.053	*	129/128	1.257	32	1.04	*	130/128	1.349
186	gi|53130266	hypothetical protein RCJMB04_6k20 [Gallus gallus]	1825	62056	103	80	22	21	49.5	9.2	4.49	Quantitation summary for protein	129/126	0.961	89	[1.028]		130/126	0.929	89	[1.041]		131/126	0.974	88	1.029	*	129/127	0.951	89	[1.030]		130/127	0.939	90	[1.050]		131/127	0.973	88	[1.034]		129/128	0.899	89	[1.023]		130/128	0.882
187	gi|62851	unnamed protein product [Gallus gallus]	1823	46692	104	86	21	20	54.9	6.92	6.23	Quantitation summary for protein	129/126	1.116	95	[1.027]		130/126	0.86	95	[1.056]		131/126	0.973	95	[1.044]		129/127	1.145	95	[1.023]		130/127	0.901	95	[1.068]		131/127	1.008	95	[1.052]		129/128	1.134	95	1.024	*	130/128	0.887
188	gi|363743351	PREDICTED: 26S protease regulatory subunit 8 [Gallus gallus]	1817	54335	74	61	20	15	56	7.11	2.44	Quantitation summary for protein	129/126	1.106	68	1.031	*	130/126	0.978	68	1.035	*	131/126	1.058	68	1.03	*	129/127	1.059	68	1.03	*	130/127	0.956	68	1.041	*	131/127	1.023	68	1.035	*	129/128	1.101	68	1.024	*	130/128	0.988
189	gi|363736327	PREDICTED: d-3-phosphoglycerate dehydrogenase [Gallus gallus]	1757	62408	61	58	16	15	36.6	8.43	1.79	Quantitation summary for protein	129/126	0.865	59	[1.026]		130/126	0.667	59	1.053	*	131/126	0.657	59	[1.049]		129/127	1.16	59	1.026	*	130/127	0.914	59	[1.051]		131/127	0.89	59	[1.046]		129/128	0.988	59	1.022	*	130/128	0.774
190	gi|53127382	hypothetical protein RCJMB04_2b5 [Gallus gallus]	1756	70910	86	59	24	17	49.1	5.66	1.59	Quantitation summary for protein	129/126	0.909	59	1.055	*	130/126	1.017	59	[1.085]		131/126	0.959	59	[1.064]		129/127	0.883	59	[1.055]		130/127	1.008	59	[1.090]		131/127	0.941	59	[1.074]		129/128	0.96	59	1.035	*	130/128	1.09
191	gi|53131390	hypothetical protein RCJMB04_11l21 [Gallus gallus]	1756	32741	81	71	16	15	61.6	4.73	11.32	Quantitation summary for protein	129/126	0.968	38	1.049	*	130/126	0.914	38	1.061	*	131/126	1.009	38	1.062		129/127	0.953	38	1.04	*	130/127	0.917	38	1.068	*	131/127	1.003	38	[1.051]		129/128	1.024	38	1.036	*	130/128	0.98
192	gi|53132751	hypothetical protein RCJMB04_13o20 [Gallus gallus]	1755	44741	59	54	12	12	34.4	5.04	2.13	Quantitation summary for protein	129/126	1.05	58	1.035	*	130/126	0.84	58	1.039	*	131/126	0.869	57	1.03	*	129/127	1.148	58	[1.043]		130/127	0.937	58	1.04	*	131/127	0.958	58	[1.033]		129/128	0.908	58	[1.022]		130/128	0.737
193	gi|6013185	Sk-tropomodulin [Gallus gallus]	1718	45044	70	56	15	12	45.2	4.91	3.11	Quantitation summary for protein	129/126	1.367	2	1.108		130/126	0.879	2	1.543		131/126	1.341	2	1.391		129/127	1.943	2	1.451		130/127	1.275	2	2.022		131/127	1.925	2	1.823		129/128	1.414	2	1.295		130/128	0.922
194	gi|50740506	PREDICTED: uncharacterized protein LOC421428 [Gallus gallus]	1716	25237	135	89	13	11	60.6	6.1	16.52	Quantitation summary for protein	129/126	0.939	123	[1.035]		130/126	0.831	123	[1.049]		131/126	0.752	123	[1.045]		129/127	0.966	123	[1.038]		130/127	0.872	123	[1.057]		131/127	0.781	123	[1.052]		129/128	0.888	123	[1.034]		130/128	0.797
195	gi|196049779	Chain E, Chicken Cytochrome Bc1 Complex Inhibited By An Iodinated Analogue Of The Polyketide Crocacin-d	1706	24501	57	48	9	8	43.4	6.07	4.98	Quantitation summary for protein	129/126	0.944	5	1.024	*	130/126	0.872	5	1.064	*	131/126	0.948	5	1.054		129/127	1.076	5	1.082		130/127	1.015	5	1.044		131/127	1.092	5	1.075		129/128	1.024	5	1.078		130/128	0.959
196	gi|114372	RecName: Full=Sodium/potassium-transporting ATPase subunit alpha-1; Short=Na(+)/K(+) ATPase alpha-1 subunit; AltName: Full=Sodium pump subunit alpha-1; Flags: Precursor	1703	126361	66	62	18	17	23.3	5.5	0.89	Quantitation summary for protein	129/126	0.919	36	1.036	*	130/126	0.993	36	1.033		131/126	0.818	36	1.034	*	129/127	1.204	36	1.029	*	130/127	1.329	36	1.055	*	131/127	1.083	36	1.039	*	129/128	1.096	36	1.03	*	130/128	1.223
197	gi|363747386	PREDICTED: citrate synthase, mitochondrial-like [Gallus gallus]	1697	46829	69	65	10	9	24.1	6.5	1.59	Quantitation summary for protein	129/126	0.877	11	1.166	*	130/126	0.812	11	[1.522]		131/126	0.764	11	1.225	*	129/127	0.898	10	1.064	*	130/127	0.848	11	[1.564]		131/127	0.789	11	[1.202]		129/128	0.987	10	1.043		130/128	0.927
198	gi|50755288	PREDICTED: betaine--homocysteine S-methyltransferase 1 [Gallus gallus]	1691	53573	96	79	19	17	55.8	7.56	3.71	Quantitation summary for protein	129/126	1.213	88	[1.062]		130/126	1.091	88	[1.067]		131/126	1.256	88	[1.057]		129/127	1.115	88	[1.063]		130/127	1.023	88	[1.077]		131/127	1.166	88	[1.065]		129/128	0.982	88	[1.040]		130/128	0.895
199	gi|293597548	calcium channel, voltage-dependent, alpha 2/delta subunit 1 preproprotein [Gallus gallus]	1676	139738	74	71	23	22	21.7	5.09	1	Quantitation summary for protein	129/126	0.917	72	[1.026]		130/126	0.879	72	[1.061]		131/126	0.867	72	[1.032]		129/127	1.043	72	1.022	*	130/127	1.021	72	[1.068]		131/127	0.996	72	[1.033]		129/128	1.043	72	[1.025]		130/128	1.015
200	gi|50729032	PREDICTED: tubulin alpha-8 chain [Gallus gallus]	1668	54885	98	80	15	12	35.6	5.01	3.3	Quantitation summary for protein	129/126	0.977	8	1.08		130/126	1.06	9	1.061	*	131/126	1.068	9	1.11		129/127	0.996	8	1.045		130/127	1.041	7	1.045		131/127	1.083	9	1.123		129/128	1.135	9	[1.078]		130/128	1.198
201	gi|63711	unnamed protein product [Gallus gallus]	1667	96964	80	74	19	17	23.2	4.9	0.88	Quantitation summary for protein	129/126	2.272	76	1.035	*	130/126	1.807	76	1.027	*	131/126	2.183	76	1.028	*	129/127	0.945	76	[1.018]		130/127	0.767	76	[1.023]		131/127	0.917	76	1.015	*	129/128	1.034	76	[1.016]		130/128	0.835
202	gi|118085057	PREDICTED: acetyl-CoA acetyltransferase A, mitochondrial [Gallus gallus]	1652	51394	61	58	14	14	45.4	9.12	2.47	Quantitation summary for protein	129/126	0.9	59	[1.060]		130/126	1.067	59	[1.068]		131/126	0.939	59	[1.053]		129/127	0.948	59	[1.056]		130/127	1.147	59	[1.076]		131/127	0.998	59	[1.059]		129/128	0.873	60	1.04	*	130/128	1.049
203	gi|53133686	hypothetical protein RCJMB04_19g1 [Gallus gallus]	1651	31831	63	56	16	15	65.2	9.68	7.03	Quantitation summary for protein	129/126	1.373	60	[1.081]		130/126	1.145	60	[1.079]		131/126	1.124	60	1.073	*	129/127	0.916	60	[1.080]		130/127	0.78	60	1.09	*	131/127	0.757	60	1.082	*	129/128	0.922	60	1.037	*	130/128	0.78
204	gi|118100855	PREDICTED: probable aminopeptidase NPEPL1 [Gallus gallus]	1650	62410	65	57	15	14	32.9	6.41	1.39	Quantitation summary for protein	129/126	0.786	62	1.047	*	130/126	0.915	62	1.041	*	131/126	0.785	62	[1.049]		129/127	0.851	62	[1.040]		130/127	1.012	62	1.047	*	131/127	0.859	62	[1.042]		129/128	0.959	62	1.029	*	130/128	1.133
205	gi|310772215	phosphatidylethanolamine-binding protein 1 [Gallus gallus]	1645	24781	72	57	10	9	72.7	6.96	10.09	Quantitation summary for protein	129/126	0.906	70	1.068	*	130/126	0.911	70	[1.101]		131/126	0.752	70	[1.068]		129/127	1.076	70	[1.080]		130/127	1.105	70	[1.091]		131/127	0.902	70	[1.073]		129/128	0.941	70	[1.052]		130/128	0.96
206	gi|53127640	hypothetical protein RCJMB04_2m19 [Gallus gallus]	1644	32451	48	44	8	7	40.2	8.54	1.65	Quantitation summary for protein	129/126	0.963	38	[1.038]		130/126	0.759	38	1.07	*	131/126	0.814	38	1.044	*	129/127	1.048	38	[1.038]		130/127	0.843	38	[1.076]		131/127	0.894	38	1.053	*	129/128	0.835	38	[1.031]		130/128	0.668
207	gi|104728	Ig light chain precursor V-J region - chicken (fragment)	1628	25061	111	99	5	4	17.4	5.36	1.12	Quantitation summary for protein	129/126	---	0	---		130/126	---	0	---		131/126	---	0	---		129/127	---	0	---		130/127	---	0	---		131/127	---	0	---		129/128	---	0	---		130/128	---
208	gi|53133792	hypothetical protein RCJMB04_20f2 [Gallus gallus]	1598	78820	65	47	22	14	36.5	7.94	1.35	Quantitation summary for protein	129/126	1.11	53	1.029	*	130/126	1.329	53	[1.043]		131/126	1.167	53	[1.036]		129/127	1.032	53	[1.024]		130/127	1.261	53	[1.047]		131/127	1.096	53	[1.032]		129/128	1.212	53	1.019	*	130/128	1.472
209	gi|63227	unnamed protein product [Gallus gallus]	1597	49316	148	93	14	12	38.8	5.93	2.9	Quantitation summary for protein	129/126	1.019	54	[1.065]		130/126	1.031	54	[1.073]		131/126	0.96	54	[1.086]		129/127	1.128	54	[1.070]		130/127	1.166	54	[1.083]		131/127	1.074	54	[1.098]		129/128	1.108	54	[1.059]		130/128	1.138
210	gi|63522	inhibitor of actin polymerization [Gallus gallus]	1592	24694	76	64	12	12	79.3	5.77	11.73	Quantitation summary for protein	129/126	0.902	66	1.047	*	130/126	0.986	67	[1.084]		131/126	0.619	67	1.088	*	129/127	0.882	67	[1.041]		130/127	0.986	68	1.09		131/127	0.682	66	1.082	*	129/128	0.838	67	[1.039]		130/128	0.931
211	gi|402296	ribosomal protein S4 [Gallus gallus]	1591	36221	64	52	13	10	47.5	10.16	5.87	Quantitation summary for protein	129/126	1.345	61	1.049	*	130/126	1.141	61	[1.069]		131/126	1.131	61	1.047	*	129/127	0.955	60	1.042	*	130/127	0.866	61	[1.061]		131/127	0.849	61	1.046	*	129/128	1.024	61	[1.036]		130/128	0.881
212	gi|53136800	hypothetical protein RCJMB04_34b10 [Gallus gallus]	1585	89903	75	61	24	20	38.5	6.1	1.63	Quantitation summary for protein	129/126	1.06	64	1.035	*	130/126	0.851	64	[1.080]		131/126	0.894	64	[1.057]		129/127	1.116	64	[1.032]		130/127	0.914	64	[1.084]		131/127	0.95	64	[1.059]		129/128	1.204	64	[1.033]		130/128	0.98
213	gi|13434994	PIT 54 [Gallus gallus]	1577	57254	56	52	15	15	46.2	4.61	2.42	Quantitation summary for protein	129/126	2.075	53	1.062	*	130/126	1.397	53	1.047	*	131/126	1.95	53	1.054	*	129/127	2.257	53	1.06	*	130/127	1.55	53	1.046	*	131/127	2.141	53	1.052	*	129/128	1.813	53	1.048	*	130/128	1.238
214	gi|118086389	PREDICTED: adenylyl cyclase-associated protein 2 [Gallus gallus]	1575	61813	77	68	19	16	37.9	6.34	3.05	Quantitation summary for protein	129/126	1.071	71	[1.036]		130/126	0.953	71	[1.066]		131/126	0.975	71	[1.054]		129/127	0.944	71	1.034	*	130/127	0.858	71	[1.076]		131/127	0.868	71	[1.059]		129/128	1.016	71	[1.031]		130/128	0.918
215	gi|53133512	hypothetical protein RCJMB04_17g3 [Gallus gallus]	1560	70735	79	70	24	22	51.2	5.96	2.41	Quantitation summary for protein	129/126	0.936	75	1.03	*	130/126	0.952	75	1.042	*	131/126	0.918	75	1.037	*	129/127	0.922	75	[1.030]		130/127	0.957	75	1.044	*	131/127	0.914	75	1.039	*	129/128	0.992	75	[1.024]		130/128	1.023
216	gi|363733689	PREDICTED: LOW QUALITY PROTEIN: dysferlin, partial [Gallus gallus]	1552	249937	72	62	30	25	18.7	5.47	0.48	Quantitation summary for protein	129/126	0.776	62	1.04	*	130/126	0.717	62	1.039	*	131/126	0.741	62	1.041	*	129/127	1.122	62	1.029	*	130/127	1.058	62	[1.038]		131/127	1.083	62	1.037	*	129/128	1.128	61	1.027	*	130/128	1.057
217	gi|118083310	PREDICTED: ubiquitin carboxyl-terminal hydrolase 5 isoform 2 [Gallus gallus]	1543	106627	61	56	13	11	17.2	5.03	0.62	Quantitation summary for protein	129/126	1.018	55	1.037	*	130/126	0.914	55	[1.076]		131/126	0.936	55	1.066	*	129/127	1.163	55	1.051	*	130/127	1.066	55	[1.083]		131/127	1.081	55	1.066	*	129/128	1.267	55	[1.048]		130/128	1.154
218	gi|44969651	calreticulin [Gallus gallus]	1543	56017	85	67	17	14	44.8	4.41	3.16	Quantitation summary for protein	129/126	1.035	70	[1.072]		130/126	1.033	69	[1.155]		131/126	1.073	70	[1.114]		129/127	1.153	70	[1.072]		130/127	1.176	69	[1.152]		131/127	1.208	70	[1.111]		129/128	1.134	70	[1.047]		130/128	1.152
219	gi|62992	transthyretin [Gallus gallus]	1523	18189	47	43	7	6	45.3	5.11	4.48	Quantitation summary for protein	129/126	0.998	44	[1.061]		130/126	1.041	44	[1.097]		131/126	1.028	44	[1.065]		129/127	0.985	45	[1.050]		130/127	1.047	45	[1.108]		131/127	1.023	45	[1.073]		129/128	0.928	45	[1.036]		130/128	0.98
220	gi|363734519	PREDICTED: methylmalonate-semialdehyde dehydrogenase [acylating], mitochondrial [Gallus gallus]	1518	69223	58	50	16	14	36	6.33	1.53	Quantitation summary for protein	129/126	1.046	52	1.063	*	130/126	0.983	52	1.068		131/126	1.076	52	1.046	*	129/127	1.083	52	[1.053]		130/127	1.039	52	1.076	*	131/127	1.125	52	[1.053]		129/128	0.989	52	[1.057]		130/128	0.942
221	gi|408500	beta-H globin [Gallus gallus]	1513	19219	83	72	9	9	52.4	9.2	14.6	Quantitation summary for protein	129/126	0.987	13	1.096		130/126	3.097	13	[1.270]		131/126	2.366	13	[1.206]		129/127	0.836	13	1.077	*	130/127	2.679	13	[1.285]		131/127	2.025	13	[1.221]		129/128	1.206	13	1.112	*	130/128	3.838
222	gi|157391335	unnamed protein product [Gallus gallus]	1511	213527	78	68	21	20	14	9.18	0.48	Quantitation summary for protein	129/126	---	0	---		130/126	---	0	---		131/126	---	0	---		129/127	---	0	---		130/127	---	0	---		131/127	---	0	---		129/128	---	0	---		130/128	---
223	gi|2842531	gamma-subunit of enolase [Gallus gallus]	1510	53579	92	54	10	7	20.3	4.84	0.93	Quantitation summary for protein	129/126	1.011	2	1.099		130/126	0.455	2	1.589		131/126	0.612	2	1.099		129/127	0.873	2	1.094		130/127	0.401	2	1.911		131/127	0.534	2	1.322		129/128	0.809	2	1.152		130/128	0.37
224	gi|363745046	PREDICTED: uncharacterized protein LOC426646 [Gallus gallus]	1500	106565	63	53	11	9	22.5	9.41	0.35	Quantitation summary for protein	129/126	0.983	53	1.055	*	130/126	0.967	53	1.043	*	131/126	0.987	53	[1.054]		129/127	1.022	54	1.057	*	130/127	1.019	54	1.061	*	131/127	1.032	54	1.046	*	129/128	0.888	54	[1.040]		130/128	0.88
225	gi|60098585	hypothetical protein RCJMB04_3n20 [Gallus gallus]	1491	69586	76	54	28	23	48.8	5.53	2.99	Quantitation summary for protein	129/126	0.943	66	[1.038]		130/126	0.966	66	[1.067]		131/126	0.96	66	[1.047]		129/127	0.923	66	[1.036]		130/127	0.965	66	[1.072]		131/127	0.949	66	[1.051]		129/128	0.963	66	1.023	*	130/128	1.001
226	gi|2780941	Chain A, Chicken Citrate Synthase Complex With Trifluoroacetonyl-Coa And Citrate	1482	53691	64	59	8	7	18.1	7.36	0.81	Quantitation summary for protein	129/126	0.801	5	1.032	*	130/126	1.519	5	1.028	*	131/126	1.264	5	1.046	*	129/127	0.871	5	1.027	*	130/127	1.687	5	1.022	*	131/127	1.389	5	1.019	*	129/128	1.043	5	1.046		130/128	2.007
227	gi|381342486	40S ribosomal protein S10 [Gallus gallus]	1481	22106	75	64	12	9	55.8	10.15	3.11	Quantitation summary for protein	129/126	1.237	67	[1.042]		130/126	1.189	67	1.039	*	131/126	1.152	67	[1.044]		129/127	0.842	67	[1.037]		130/127	0.823	66	1.056	*	131/127	0.793	67	[1.048]		129/128	0.842	67	[1.039]		130/128	0.822
228	gi|363728718	PREDICTED: ATP synthase subunit O, mitochondrial isoform 2 [Gallus gallus]	1477	29191	58	47	10	9	47.7	9.85	5.98	Quantitation summary for protein	129/126	0.923	47	1.051	*	130/126	1.228	47	1.052	*	131/126	1.131	47	1.053	*	129/127	0.818	46	1.042	*	130/127	1.113	47	[1.054]		131/127	1.014	47	1.073		129/128	0.873	47	1.032	*	130/128	1.178
229	gi|53127794	hypothetical protein RCJMB04_3g13 [Gallus gallus]	1471	71455	86	60	20	16	35.1	6.17	2.07	Quantitation summary for protein	129/126	0.995	56	1.034		130/126	0.881	57	1.037	*	131/126	0.865	57	1.036	*	129/127	1.045	57	[1.034]		130/127	0.925	56	1.037	*	131/127	0.916	57	[1.039]		129/128	1.051	57	[1.033]		130/128	0.941
230	gi|363737914	PREDICTED: talin-2 [Gallus gallus]	1467	312829	63	54	29	25	12.9	5.39	0.32	Quantitation summary for protein	129/126	1.521	32	1.11	*	130/126	1.26	32	1.086	*	131/126	1.275	32	1.083	*	129/127	1.049	34	1.08	*	130/127	0.887	33	1.111	*	131/127	0.888	32	1.115	*	129/128	1.08	30	1.065	*	130/128	0.909
231	gi|537610	myosin binding protein-H [Gallus gallus]	1466	69869	97	73	30	24	50.1	7.23	2.46	Quantitation summary for protein	129/126	0.748	84	[1.047]		130/126	1.14	84	[1.061]		131/126	1.995	84	[1.052]		129/127	1.723	85	[1.068]		130/127	2.676	85	1.066	*	131/127	4.64	85	1.083	*	129/128	1.622	85	1.069	*	130/128	2.503
232	gi|212811	beta-tropomyosin [Gallus gallus]	1461	34154	141	83	25	20	60.5	4.65	27.05	Quantitation summary for protein	129/126	---	0	---		130/126	---	0	---		131/126	---	0	---		129/127	---	0	---		130/127	---	0	---		131/127	---	0	---		129/128	---	0	---		130/128	---
233	gi|3420175	WDR1 protein [Gallus gallus]	1443	77521	62	53	13	11	20.9	6.19	0.79	Quantitation summary for protein	129/126	1.19	57	[1.035]		130/126	0.717	56	[1.079]		131/126	0.799	57	1.054	*	129/127	1.296	57	[1.044]		130/127	0.797	56	[1.080]		131/127	0.878	57	[1.052]		129/128	1.194	57	[1.019]		130/128	0.729
234	gi|7619884	muscle derived protein [Gallus gallus]	1432	92724	57	40	16	12	24.7	4.91	0.74	Quantitation summary for protein	129/126	1.171	47	[1.042]		130/126	1.191	47	1.045	*	131/126	0.879	47	[1.037]		129/127	0.842	47	[1.039]		130/127	0.88	44	1.035	*	131/127	0.638	47	1.052	*	129/128	1.023	47	[1.036]		130/128	1.055
235	gi|50729038	PREDICTED: aldo-keto reductase family 1 member B10 [Gallus gallus]	1427	42618	82	67	15	15	49.4	7.08	4.17	Quantitation summary for protein	129/126	0.855	37	[1.091]		130/126	0.699	37	1.094	*	131/126	0.682	37	[1.083]		129/127	1.171	37	[1.107]		130/127	0.977	37	1.082		131/127	0.942	37	1.069	*	129/128	0.871	37	1.04	*	130/128	0.722
236	gi|1399943	26S ATPase complex subunit 4 [Gallus gallus]	1424	59885	59	50	14	12	39.3	5.87	1.76	Quantitation summary for protein	129/126	1.074	52	1.043	*	130/126	0.953	52	1.046	*	131/126	1.002	52	[1.042]		129/127	1.025	52	1.039	*	130/127	0.928	52	1.063	*	131/127	0.966	52	[1.054]		129/128	1.116	52	1.029	*	130/128	1.004
237	gi|53130750	hypothetical protein RCJMB04_9n20 [Gallus gallus]	1421	49120	70	57	12	10	32.7	8.53	1.48	Quantitation summary for protein	129/126	0.952	62	[1.023]		130/126	0.987	62	[1.023]		131/126	1.022	62	[1.029]		129/127	0.88	62	1.021	*	130/127	0.931	62	[1.030]		131/127	0.954	62	[1.030]		129/128	0.893	62	1.018	*	130/128	0.939
238	gi|2358016	glutathione S-transferases CL2 [Gallus gallus]	1419	29485	62	54	12	10	63.2	6.85	5.84	Quantitation summary for protein	129/126	0.907	61	1.063	*	130/126	0.927	61	[1.067]		131/126	0.752	61	1.067	*	129/127	1.199	61	[1.082]		130/127	1.251	61	1.065	*	131/127	1.003	61	1.048		129/128	1.023	61	[1.033]		130/128	1.06
239	gi|363737203	PREDICTED: eukaryotic translation initiation factor 4 gamma 1 [Gallus gallus]	1407	206662	78	57	26	18	16.7	5.24	0.48	Quantitation summary for protein	129/126	0.96	47	1.034	*	130/126	0.971	47	[1.058]		131/126	0.866	47	1.043	*	129/127	0.921	47	[1.028]		130/127	0.952	47	[1.080]		131/127	0.84	47	1.066	*	129/128	1.108	46	1.025	*	130/128	1.137
240	gi|53130754	hypothetical protein RCJMB04_9n22 [Gallus gallus]	1403	22375	70	61	7	6	60.4	8.68	2.5	Quantitation summary for protein	129/126	0.953	60	[1.024]		130/126	0.768	60	[1.049]		131/126	0.813	60	[1.045]		129/127	1.207	62	[1.022]		130/127	0.993	62	[1.038]		131/127	1.041	62	[1.038]		129/128	1.04	63	[1.024]		130/128	0.851
241	gi|363743802	PREDICTED: thimet oligopeptidase-like [Gallus gallus]	1387	91604	57	50	20	19	31.4	5.78	1.41	Quantitation summary for protein	129/126	1.099	52	[1.051]		130/126	0.853	52	[1.067]		131/126	0.895	52	1.053	*	129/127	1.084	52	[1.052]		130/127	0.858	52	[1.061]		131/127	0.891	52	[1.054]		129/128	1.055	52	[1.033]		130/128	0.831
242	gi|53133428	hypothetical protein RCJMB04_16h16 [Gallus gallus]	1371	41487	42	37	9	9	29.2	4.63	1.71	Quantitation summary for protein	129/126	0.746	38	[1.082]		130/126	1.349	38	[1.155]		131/126	0.91	38	[1.090]		129/127	0.821	38	1.053	*	130/127	1.515	38	[1.193]		131/127	1.011	38	[1.124]		129/128	1.061	37	[1.064]		130/128	1.945
243	gi|8670805	T-complex protein 1 delta subunit [Gallus gallus]	1371	67667	57	48	21	19	43.8	7.94	1.7	Quantitation summary for protein	129/126	0.928	51	[1.039]		130/126	0.941	51	[1.038]		131/126	0.946	51	[1.046]		129/127	0.877	51	[1.052]		130/127	0.908	51	[1.046]		131/127	0.903	51	[1.061]		129/128	0.937	51	[1.038]		130/128	0.964
244	gi|53133342	hypothetical protein RCJMB04_15l3 [Gallus gallus]	1370	73048	50	45	10	9	21.9	6.31	0.69	Quantitation summary for protein	129/126	1.477	47	[1.064]		130/126	1.002	47	1.044		131/126	1.01	47	1.027	*	129/127	1.077	47	[1.033]		130/127	0.746	47	1.059	*	131/127	0.744	47	1.056	*	129/128	1.21	47	[1.042]		130/128	0.833
245	gi|62888	decorin [Gallus gallus]	1368	46248	63	55	12	11	39.5	8.71	1.45	Quantitation summary for protein	129/126	1.025	57	[1.024]		130/126	1.032	57	[1.027]		131/126	1.654	57	[1.036]		129/127	0.995	57	[1.024]		130/127	1.023	57	[1.036]		131/127	1.622	57	[1.032]		129/128	0.904	57	[1.029]		130/128	0.923
246	gi|4572456	vitamin-D binding protein precursor [Gallus gallus]	1365	63153	50	47	13	12	29.8	6.47	1.37	Quantitation summary for protein	129/126	1.236	50	1.033	*	130/126	1.124	50	1.045	*	131/126	1.499	50	1.047	*	129/127	1.334	50	1.035	*	130/127	1.239	50	[1.049]		131/127	1.635	50	[1.055]		129/128	1.273	50	1.033	*	130/128	1.175
247	gi|363733172	PREDICTED: aminoacyl tRNA synthase complex-interacting multifunctional protein 1 [Gallus gallus]	1362	44404	59	53	13	11	41.6	8.96	1.93	Quantitation summary for protein	129/126	0.958	54	1.032	*	130/126	1.143	54	[1.058]		131/126	1.1	54	[1.038]		129/127	0.892	55	1.026	*	130/127	1.088	55	[1.062]		131/127	1.034	55	[1.042]		129/128	0.88	55	[1.017]		130/128	1.065
248	gi|363729205	PREDICTED: cullin-5 [Gallus gallus]	1360	116899	77	63	22	18	23.5	8.61	1.05	Quantitation summary for protein	129/126	0.927	70	[1.018]		130/126	0.907	70	1.043	*	131/126	0.805	70	1.029	*	129/127	0.952	70	1.014	*	130/127	0.951	70	[1.045]		131/127	0.834	70	1.031	*	129/128	1.136	70	[1.016]		130/128	1.128
249	gi|53136666	hypothetical protein RCJMB04_32c11 [Gallus gallus]	1359	30604	83	61	15	12	63.4	4.63	9.7	Quantitation summary for protein	129/126	1.052	55	[1.083]		130/126	0.952	55	1.098	*	131/126	0.969	55	1.072	*	129/127	0.959	54	1.051	*	130/127	0.886	55	[1.127]		131/127	0.892	55	[1.095]		129/128	0.868	55	[1.071]		130/128	0.797
250	gi|124339781	clathrin heavy chain 1 [Gallus gallus]	1355	215943	70	59	24	22	14.9	5.52	0.48	Quantitation summary for protein	129/126	1.134	22	1.09	*	130/126	1.099	21	1.051	*	131/126	1.035	21	1.045	*	129/127	1.042	22	1.049	*	130/127	1.016	22	1.084		131/127	0.962	22	[1.077]		129/128	1.259	22	1.07	*	130/128	1.22
251	gi|136036	RecName: Full=Troponin C, slow skeletal and cardiac muscles; Short=TN-C	1349	21741	63	42	9	8	58.4	4.05	8.92	Quantitation summary for protein	129/126	0.728	3	1.274		130/126	1.38	3	1.165		131/126	0.985	3	1.306		129/127	1.217	3	1.173		130/127	2.354	3	1.323	*	131/127	1.664	3	1.067	*	129/128	1.092	3	1.174		130/128	2.098
252	gi|118093267	PREDICTED: putative methyltransferase DDB_G0268948 isoform 1 [Gallus gallus]	1348	35224	53	43	12	11	35.1	6	4.06	Quantitation summary for protein	129/126	1.019	47	1.037	*	130/126	0.953	47	[1.076]		131/126	1.083	47	[1.053]		129/127	0.87	47	1.033	*	130/127	0.83	47	[1.081]		131/127	0.934	47	[1.057]		129/128	0.916	47	1.022	*	130/128	0.868
253	gi|53133834	hypothetical protein RCJMB04_20m7 [Gallus gallus]	1344	55777	44	41	7	6	16.9	6.55	0.88	Quantitation summary for protein	129/126	1.085	44	[1.034]		130/126	0.844	44	1.046	*	131/126	1.041	44	1.039	*	129/127	1.075	44	1.034	*	130/127	0.853	44	[1.043]		131/127	1.041	44	1.031	*	129/128	0.924	44	1.023	*	130/128	0.729
254	gi|53130844	hypothetical protein RCJMB04_10g10 [Gallus gallus]	1342	33308	62	57	15	14	58.3	4.81	5.08	Quantitation summary for protein	129/126	1.008	25	[1.039]		130/126	0.954	24	1.033	*	131/126	0.963	25	[1.028]		129/127	0.929	24	1.026	*	130/127	0.898	25	[1.048]		131/127	0.895	25	1.033	*	129/128	1.113	25	1.023	*	130/128	1.069
255	gi|53133742	hypothetical protein RCJMB04_19o8 [Gallus gallus]	1338	54675	44	36	14	11	30.4	8.34	2.22	Quantitation summary for protein	129/126	0.992	41	1.052		130/126	1.079	41	1.067	*	131/126	1.091	41	1.055	*	129/127	0.951	41	[1.051]		130/127	1.056	41	1.071	*	131/127	1.057	41	1.062	*	129/128	0.859	41	[1.034]		130/128	0.948
256	gi|157829904	Chain A, Structure Of Calcium-Saturated Cardiac Troponin C, Nmr, 1 Structure	1337	21491	60	42	8	8	54.7	4.07	7.78	Quantitation summary for protein	129/126	---	0	---		130/126	---	0	---		131/126	---	0	---		129/127	---	0	---		130/127	---	0	---		131/127	---	0	---		129/128	---	0	---		130/128	---
257	gi|399513978	heart fatty acid binding protein [Gallus gallus]	1335	18501	51	47	10	10	56.4	5.92	16.14	Quantitation summary for protein	129/126	0.698	22	[1.111]		130/126	1.363	22	[1.208]		131/126	0.944	22	[1.126]		129/127	0.889	22	[1.075]		130/127	1.771	22	[1.245]		131/127	1.214	22	1.156	*	129/128	0.816	22	1.058	*	130/128	1.615
258	gi|187609622	RecName: Full=Eukaryotic translation initiation factor 2 subunit 1; AltName: Full=Eukaryotic translation initiation factor 2 subunit alpha; Short=eIF-2-alpha; Short=eIF-2A; Short=eIF-2alpha	1326	41482	49	44	12	10	44.4	5.07	1.92	Quantitation summary for protein	129/126	1.207	48	1.036	*	130/126	1.051	48	[1.038]		131/126	1.142	48	[1.043]		129/127	1.381	48	[1.035]		130/127	1.228	48	[1.046]		131/127	1.32	48	[1.046]		129/128	0.92	48	[1.036]		130/128	0.814
259	gi|45239430	annexin I [Gallus gallus]	1324	46782	57	53	14	14	41.2	7.05	2.91	Quantitation summary for protein	129/126	1.478	48	[1.037]		130/126	1.052	48	1.033	*	131/126	1.406	48	[1.039]		129/127	1.113	48	[1.026]		130/127	0.809	48	[1.045]		131/127	1.069	48	[1.041]		129/128	1.415	48	1.028	*	130/128	1.022
260	gi|50760928	PREDICTED: NADH dehydrogenase [ubiquinone] 1 alpha subcomplex subunit 7 [Gallus gallus]	1320	14883	40	37	4	4	44.3	10.33	1.8	Quantitation summary for protein	129/126	0.932	37	[1.048]		130/126	0.961	37	1.037	*	131/126	0.93	37	1.038	*	129/127	0.944	37	1.04	*	130/127	0.994	37	1.045		131/127	0.951	37	1.048	*	129/128	0.876	37	[1.042]		130/128	0.917
261	gi|363746869	PREDICTED: 3-hydroxyacyl-CoA dehydrogenase type-2, partial [Gallus gallus]	1317	24379	45	44	9	9	57.8	8.98	3.1	Quantitation summary for protein	129/126	0.803	28	[1.068]		130/126	1.291	28	1.057	*	131/126	0.847	28	1.081	*	129/127	0.886	28	1.046	*	130/127	1.453	28	1.084	*	131/127	0.943	28	[1.068]		129/128	0.955	28	1.046	*	130/128	1.556
262	gi|363744275	PREDICTED: phosphoglucomutase 5 [Gallus gallus]	1314	68276	37	34	8	7	14.3	6.73	0.76	Quantitation summary for protein	129/126	0.933	12	[1.040]		130/126	1.205	12	1.089	*	131/126	1.108	12	1.051	*	129/127	1.084	12	1.043	*	130/127	1.429	12	[1.122]		131/127	1.3	12	1.082	*	129/128	1.168	11	1.032	*	130/128	1.482
263	gi|238786	5-aminoimidazole-4-carboxamide-ribonucleotide transformylase-IMP cyclohydrolase [Gallus gallus]	1312	73596	54	48	17	16	32.2	8.4	1.39	Quantitation summary for protein	129/126	1.172	50	[1.057]		130/126	1.141	50	1.051	*	131/126	1.438	50	[1.053]		129/127	1.113	50	[1.043]		130/127	1.106	50	[1.064]		131/127	1.379	50	1.055	*	129/128	1.054	50	[1.022]		130/128	1.04
264	gi|1008911	l-gicerin precursor [Gallus gallus]	1307	78135	72	67	14	14	21.7	7.52	0.93	Quantitation summary for protein	129/126	0.955	67	[1.017]		130/126	0.976	67	1.017	*	131/126	0.928	67	1.019	*	129/127	0.938	67	[1.018]		130/127	0.978	67	[1.027]		131/127	0.92	67	[1.025]		129/128	1.251	67	[1.017]		130/128	1.296
265	gi|118094103	PREDICTED: 4-trimethylaminobutyraldehyde dehydrogenase [Gallus gallus]	1291	63415	56	43	18	13	35.4	7.81	1.48	Quantitation summary for protein	129/126	0.923	51	1.04	*	130/126	0.837	51	[1.049]		131/126	0.899	51	1.05	*	129/127	1.011	52	[1.037]		130/127	0.936	51	[1.049]		131/127	0.994	51	[1.046]		129/128	0.951	52	1.029	*	130/128	0.875
266	gi|85544000	Chain A, Avian Respiratory Complex Ii With Oxaloacetate And Ubiquinone	1291	75056	48	41	13	10	27.7	6.17	1.07	Quantitation summary for protein	129/126	0.902	43	1.047	*	130/126	0.988	43	[1.058]		131/126	0.907	43	1.058	*	129/127	0.901	43	[1.055]		130/127	1.008	43	1.055		131/127	0.915	43	1.054	*	129/128	0.943	43	1.034	*	130/128	1.047
267	gi|53128300	hypothetical protein RCJMB04_4l9 [Gallus gallus]	1290	63012	57	48	16	14	35.6	5.71	2.22	Quantitation summary for protein	129/126	0.988	56	1.05		130/126	0.949	56	1.076	*	131/126	0.852	56	1.06	*	129/127	1.202	56	[1.051]		130/127	1.178	56	1.086	*	131/127	1.047	56	1.069	*	129/128	0.937	56	[1.046]		130/128	0.913
268	gi|23821302	hexokinase2 [Gallus gallus]	1283	117640	59	53	21	18	23.6	5.74	0.93	Quantitation summary for protein	129/126	1.388	33	1.042	*	130/126	1.113	33	1.057	*	131/126	1.344	33	1.042	*	129/127	1.011	34	[1.038]		130/127	0.827	33	1.045	*	131/127	0.988	34	1.036		129/128	1.146	34	1.035	*	130/128	0.933
269	gi|50745031	PREDICTED: protein disulfide-isomerase A6 isoform 2 [Gallus gallus]	1272	56719	52	48	12	12	29.3	5.02	1.61	Quantitation summary for protein	129/126	1.061	49	[1.038]		130/126	0.86	49	[1.086]		131/126	0.913	49	[1.068]		129/127	0.996	49	[1.039]		130/127	0.824	49	[1.084]		131/127	0.865	49	[1.066]		129/128	0.872	49	[1.024]		130/128	0.717
270	gi|196049778	Chain D, Chicken Cytochrome Bc1 Complex Inhibited By An Iodinated Analogue Of The Polyketide Crocacin-d	1270	30130	43	41	5	5	29.9	6.32	1.85	Quantitation summary for protein	129/126	0.882	42	1.065	*	130/126	1.216	42	[1.080]		131/126	0.937	42	[1.065]		129/127	0.965	42	1.048	*	130/127	1.359	42	[1.114]		131/127	1.036	42	[1.087]		129/128	1.143	42	[1.068]		130/128	1.599
271	gi|88909611	RecName: Full=Elongation factor Tu, mitochondrial; Short=EF-Tu; Flags: Precursor	1270	41032	35	32	10	8	36.4	8.98	1.17	Quantitation summary for protein	129/126	1.093	32	[1.052]		130/126	1.064	31	1.068	*	131/126	1.082	32	1.058	*	129/127	0.82	32	[1.041]		130/127	0.816	31	1.084	*	131/127	0.82	32	1.07	*	129/128	0.863	32	[1.050]		130/128	0.854
272	gi|260103640	cyclophilin A [Gallus gallus]	1266	21063	81	67	13	10	69.1	8.29	13.29	Quantitation summary for protein	129/126	1.01	70	[1.103]		130/126	0.874	69	1.093	*	131/126	0.945	69	[1.066]		129/127	1.091	70	[1.089]		130/127	0.963	69	[1.103]		131/127	1.03	69	[1.073]		129/128	1.016	70	1.049	*	130/128	0.892
273	gi|60098851	hypothetical protein RCJMB04_12o19 [Gallus gallus]	1259	65258	45	38	15	13	34	8.01	1.95	Quantitation summary for protein	129/126	0.933	39	[1.092]		130/126	0.902	39	1.118	*	131/126	0.82	39	1.095	*	129/127	0.925	39	[1.088]		130/127	0.913	39	[1.125]		131/127	0.82	39	1.104	*	129/128	0.828	39	1.061	*	130/128	0.813
274	gi|138533	RecName: Full=Vimentin	1256	58667	59	53	19	18	40.7	5.09	2.5	Quantitation summary for protein	129/126	1.587	6	1.086	*	130/126	1.459	6	1.131	*	131/126	1.512	6	1.133	*	129/127	1.24	6	1.121	*	130/127	1.163	6	1.182		131/127	1.193	6	1.193		129/128	1.034	6	1.043		130/128	0.964
275	gi|53127328	hypothetical protein RCJMB04_1n4 [Gallus gallus]	1248	39134	97	71	16	13	47	9.74	5.45	Quantitation summary for protein	129/126	1.032	31	[1.216]		130/126	1.001	31	1.077		131/126	0.916	31	1.09	*	129/127	0.966	31	[1.100]		130/127	0.957	31	[1.116]		131/127	0.866	31	1.102	*	129/128	0.987	31	[1.118]		130/128	0.972
276	gi|293631995	DJ-1 [Gallus gallus]	1246	23813	57	50	16	14	72.5	6.32	14.72	Quantitation summary for protein	129/126	0.825	44	[1.100]		130/126	0.784	44	[1.159]		131/126	0.78	43	[1.103]		129/127	1.07	44	[1.093]		130/127	1.039	44	[1.159]		131/127	1.025	42	1.087		129/128	0.887	44	1.044	*	130/128	0.855
277	gi|50754381	PREDICTED: ras-related protein Rab-7a isoform 2 [Gallus gallus]	1241	27943	56	51	9	8	51.7	6.4	3.83	Quantitation summary for protein	129/126	1.024	54	[1.039]		130/126	0.988	54	[1.044]		131/126	0.982	54	[1.040]		129/127	0.971	54	1.023	*	130/127	0.956	54	[1.062]		131/127	0.941	54	[1.062]		129/128	1.364	53	[1.046]		130/128	1.335
278	gi|11999245	ATP synthase alpha subunit [Gallus gallus]	1236	14292	84	71	10	8	58.2	9.93	29.4	Quantitation summary for protein	129/126	0.373	6	1.031	*	130/126	1.236	6	1.035	*	131/126	1.246	6	1.041	*	129/127	0.453	6	1.02	*	130/127	1.532	6	1.023	*	131/127	1.528	6	1.03	*	129/128	1.199	6	1.049	*	130/128	4.026
279	gi|356460917	40S ribosomal protein S8 [Gallus gallus]	1235	31788	40	38	6	5	26.9	10.32	1.45	Quantitation summary for protein	129/126	1.363	39	[1.056]		130/126	1.275	39	1.031	*	131/126	1.272	38	1.04	*	129/127	0.892	39	[1.032]		130/127	0.85	38	1.029	*	131/127	0.838	39	[1.035]		129/128	1.102	38	1.034	*	130/128	1.046
280	gi|60098921	hypothetical protein RCJMB04_15g18 [Gallus gallus]	1235	54957	64	56	14	14	31.6	4.82	1.69	Quantitation summary for protein	129/126	0.84	5	1.088	*	130/126	0.782	5	1.117	*	131/126	0.736	5	1.089	*	129/127	1.074	5	1.04	*	130/127	1.02	5	1.109		131/127	0.949	5	1.026	*	129/128	1.165	5	1.106	*	130/128	1.1
281	gi|118096783	PREDICTED: isoleucyl-tRNA synthetase, cytoplasmic [Gallus gallus]	1235	166668	71	61	22	20	19	6.14	0.47	Quantitation summary for protein	129/126	1.138	64	1.022	*	130/126	0.997	64	1.026		131/126	0.934	64	[1.019]		129/127	0.925	64	[1.023]		130/127	0.827	64	1.039	*	131/127	0.767	64	[1.030]		129/128	1.22	64	1.02	*	130/128	1.085
282	gi|53127891	hypothetical protein RCJMB04_4e21 [Gallus gallus]	1232	42952	67	52	8	7	23	9.33	2.8	Quantitation summary for protein	129/126	0.926	64	1.058	*	130/126	1.1	64	[1.080]		131/126	0.962	64	[1.072]		129/127	0.932	62	1.039	*	130/127	1.133	64	[1.089]		131/127	0.98	64	[1.077]		129/128	1.094	64	1.03	*	130/128	1.318
283	gi|53127704	hypothetical protein RCJMB04_2p22 [Gallus gallus]	1231	83628	64	55	16	12	23.9	6.92	0.85	Quantitation summary for protein	129/126	1.363	60	[1.043]		130/126	0.979	60	[1.041]		131/126	1.067	60	[1.033]		129/127	1.11	60	1.023	*	130/127	0.814	60	[1.052]		131/127	0.877	60	[1.041]		129/128	1.017	60	[1.023]		130/128	0.741
284	gi|15420977	malic enzyme [Gallus gallus]	1230	70323	66	51	20	15	38.8	6.45	2.13	Quantitation summary for protein	129/126	0.84	45	1.065	*	130/126	0.81	46	1.084	*	131/126	0.73	45	1.074	*	129/127	0.88	45	[1.054]		130/127	0.865	45	[1.095]		131/127	0.772	45	1.069	*	129/128	0.8	45	1.049	*	130/128	0.782
285	gi|50745166	PREDICTED: trifunctional enzyme subunit beta, mitochondrial [Gallus gallus]	1229	58665	43	41	14	13	31.9	9.37	1.27	Quantitation summary for protein	129/126	1.076	41	1.037	*	130/126	1.142	40	1.043	*	131/126	1.1	40	1.034	*	129/127	1.106	40	1.025	*	130/127	1.199	41	[1.056]		131/127	1.141	41	[1.051]		129/128	0.929	41	1.029	*	130/128	1.007
286	gi|53133838	hypothetical protein RCJMB04_20n15 [Gallus gallus]	1223	52411	61	41	16	12	39.9	5.85	2.83	Quantitation summary for protein	129/126	0.894	49	[1.107]		130/126	0.952	49	[1.097]		131/126	0.809	49	1.114	*	129/127	0.752	49	[1.074]		130/127	0.818	49	1.106	*	131/127	0.688	49	[1.104]		129/128	0.975	49	1.051	*	130/128	1.054
287	gi|60098675	hypothetical protein RCJMB04_5e12 [Gallus gallus]	1220	32509	75	61	15	14	53.8	4.84	8.36	Quantitation summary for protein	129/126	0.974	24	1.05	*	130/126	0.908	24	1.093	*	131/126	0.893	24	1.087	*	129/127	1.014	24	1.043		130/127	0.965	24	1.109		131/127	0.94	24	1.108	*	129/128	0.999	24	1.045		130/128	0.944
288	gi|60099255	hypothetical protein RCJMB04_39i8 [Gallus gallus]	1213	54635	38	37	7	7	19.1	9.25	0.6	Quantitation summary for protein	129/126	0.955	37	1.036	*	130/126	1.176	37	[1.041]		131/126	1.151	36	1.024	*	129/127	0.934	37	1.033	*	130/127	1.174	37	[1.045]		131/127	1.136	37	[1.034]		129/128	0.872	37	1.037	*	130/128	1.09
289	gi|363730761	PREDICTED: dystrobrevin alpha [Gallus gallus]	1209	93572	47	44	10	10	15	6.52	0.46	Quantitation summary for protein	129/126	1.275	37	[1.048]		130/126	1.094	37	[1.033]		131/126	1.387	37	[1.039]		129/127	1.122	37	1.028	*	130/127	0.982	37	1.042	*	131/127	1.233	37	[1.032]		129/128	1.094	37	[1.036]		130/128	0.952
290	gi|209892845	CAPN3 [Gallus gallus]	1208	108754	53	47	17	14	21.2	5.6	0.7	Quantitation summary for protein	129/126	1.111	47	1.031	*	130/126	0.961	47	[1.071]		131/126	0.979	47	[1.052]		129/127	0.934	46	1.024	*	130/127	0.827	47	[1.083]		131/127	0.834	47	[1.063]		129/128	0.985	47	1.025	*	130/128	0.864
291	gi|50806608	PREDICTED: thioredoxin-like 1 [Gallus gallus]	1204	37086	44	38	9	9	42.2	4.94	1.79	Quantitation summary for protein	129/126	1.43	42	1.037	*	130/126	1.235	42	1.032	*	131/126	1.224	42	1.037	*	129/127	1.329	42	1.04	*	130/127	1.172	42	1.035	*	131/127	1.149	42	1.029	*	129/128	1.312	42	1.029	*	130/128	1.147
292	gi|152031574	RecName: Full=Collagen alpha-1(I) chain; AltName: Full=Alpha-1 type I collagen; Flags: Precursor	1197	151988	46	41	15	13	10.5	5.47	0.41	Quantitation summary for protein	129/126	1.908	38	[1.079]		130/126	1.833	38	[1.082]		131/126	3.865	38	1.105	*	129/127	1.86	38	[1.114]		130/127	1.824	38	[1.128]		131/127	3.807	38	[1.136]		129/128	1.665	39	[1.081]		130/128	1.622
293	gi|211139	anchorin CII [Gallus gallus]	1195	41560	56	49	16	15	46.7	5.6	3.63	Quantitation summary for protein	129/126	0.992	48	[1.067]		130/126	0.837	48	[1.082]		131/126	1.019	48	[1.070]		129/127	0.983	48	[1.045]		130/127	0.846	48	[1.083]		131/127	1.019	48	[1.060]		129/128	1.059	48	1.027	*	130/128	0.906
294	gi|517089	leucine zipper protein [Gallus gallus]	1195	51599	50	42	12	11	34.1	5.53	1.38	Quantitation summary for protein	129/126	1.561	43	1.069	*	130/126	1.402	43	1.068	*	131/126	1.335	43	1.059	*	129/127	1.06	43	[1.074]		130/127	0.971	43	1.064	*	131/127	0.915	43	[1.072]		129/128	0.713	42	1.067	*	130/128	0.653
295	gi|63333	unnamed protein product [Gallus gallus]	1193	88833	66	49	20	18	30.9	4.88	1.39	Quantitation summary for protein	129/126	1.062	2	1.25		130/126	1.006	2	1.8		131/126	0.851	2	1.458		129/127	1.156	2	1.033		130/127	1.117	2	1.487		131/127	0.935	2	1.205		129/128	1.283	2	1.16		130/128	1.233
296	gi|60098845	hypothetical protein RCJMB04_11o11 [Gallus gallus]	1189	28915	59	42	12	11	48.2	6.05	5.4	Quantitation summary for protein	129/126	0.892	43	1.074	*	130/126	0.861	43	[1.206]		131/126	0.821	43	[1.126]		129/127	0.973	43	1.058	*	130/127	0.958	43	[1.234]		131/127	0.905	43	[1.156]		129/128	0.882	42	1.043	*	130/128	0.865
297	gi|53128146	hypothetical protein RCJMB04_4j7 [Gallus gallus]	1187	48129	60	43	14	13	43.6	8.02	3.02	Quantitation summary for protein	129/126	1.184	46	1.113	*	130/126	1.273	45	1.091	*	131/126	1.202	44	1.078	*	129/127	1.156	45	1.085	*	130/127	1.268	45	1.104	*	131/127	1.184	45	[1.102]		129/128	0.982	46	1.048	*	130/128	1.071
298	gi|314122169	neutral alpha-glucosidase C [Gallus gallus]	1187	120862	57	50	19	16	19.8	5.96	0.66	Quantitation summary for protein	129/126	1.157	55	1.026	*	130/126	0.985	55	1.041	*	131/126	1.031	54	1.025	*	129/127	1.025	55	[1.034]		130/127	0.89	55	[1.054]		131/127	0.972	55	[1.047]		129/128	0.906	55	[1.030]		130/128	0.782
299	gi|53133536	hypothetical protein RCJMB04_17k12 [Gallus gallus]	1186	77928	44	38	11	9	16.2	6.48	0.51	Quantitation summary for protein	129/126	1.05	40	[1.054]		130/126	0.831	40	1.061	*	131/126	1.002	40	[1.067]		129/127	1.183	39	[1.052]		130/127	0.957	39	1.067	*	131/127	1.141	38	1.049	*	129/128	1.273	40	[1.047]		130/128	1.023
300	gi|363739542	PREDICTED: eukaryotic translation initiation factor 3 subunit B-like [Gallus gallus]	1178	95699	53	51	14	13	21.7	5.12	0.66	Quantitation summary for protein	129/126	1.053	51	[1.030]		130/126	1.066	51	[1.049]		131/126	0.961	51	1.045	*	129/127	0.853	51	1.019	*	130/127	0.882	51	[1.052]		131/127	0.787	51	[1.047]		129/128	0.942	51	1.021	*	130/128	0.968
301	gi|113610	RecName: Full=Fructose-bisphosphate aldolase B; AltName: Full=Liver-type aldolase	1177	45858	88	64	11	11	36.3	8.81	2.04	Quantitation summary for protein	129/126	0.445	25	1.187	*	130/126	0.712	25	[1.127]		131/126	0.694	25	[1.146]		129/127	0.319	25	1.234	*	130/127	0.521	25	1.179	*	131/127	0.502	25	[1.189]		129/128	0.376	25	1.21	*	130/128	0.607
302	gi|53132642	hypothetical protein RCJMB04_13l7 [Gallus gallus]	1174	87097	69	56	22	18	32.1	4.96	1.61	Quantitation summary for protein	129/126	0.961	64	1.028	*	130/126	0.932	64	[1.042]		131/126	1.022	64	1.039	*	129/127	0.952	64	[1.029]		130/127	0.942	64	[1.046]		131/127	1.023	64	[1.040]		129/128	1.005	64	1.025		130/128	0.988
303	gi|363745002	PREDICTED: proliferation-associated protein 2G4 [Gallus gallus]	1173	56605	48	42	14	12	33.2	6.9	1.47	Quantitation summary for protein	129/126	1.487	45	1.04	*	130/126	1.438	45	1.037	*	131/126	1.666	45	1.031	*	129/127	1.039	45	1.026	*	130/127	1.025	45	[1.040]		131/127	1.175	45	1.03	*	129/128	0.99	45	1.024	*	130/128	0.972
304	gi|3688784	homogenin [Gallus gallus]	1170	98266	62	52	11	11	14.1	5.93	0.53	Quantitation summary for protein	129/126	1.26	58	1.034	*	130/126	0.982	58	[1.044]		131/126	1.301	58	1.042	*	129/127	1.476	58	1.036	*	130/127	1.174	58	[1.053]		131/127	1.539	58	1.043	*	129/128	1.39	58	1.034	*	130/128	1.099
305	gi|6478775	dynamitin [Gallus gallus]	1168	50941	33	29	11	9	33.6	4.9	1.12	Quantitation summary for protein	129/126	1.066	30	[1.039]		130/126	1.103	30	1.024	*	131/126	0.933	30	1.025	*	129/127	0.837	29	1.031	*	130/127	0.92	30	[1.031]		131/127	0.77	30	[1.025]		129/128	0.863	30	1.027	*	130/128	0.906
306	gi|363731145	PREDICTED: uncharacterized protein LOC769368 [Gallus gallus]	1158	89756	54	42	13	12	21.4	4.88	0.91	Quantitation summary for protein	129/126	1.05	32	1.092	*	130/126	1.122	32	[1.147]		131/126	1.082	32	[1.107]		129/127	0.928	31	1.077	*	130/127	0.995	32	[1.159]		131/127	0.949	32	[1.129]		129/128	0.868	32	1.07	*	130/128	0.941
307	gi|53127764	hypothetical protein RCJMB04_3f8 [Gallus gallus]	1153	63047	63	51	16	13	31.1	8.19	1.5	Quantitation summary for protein	129/126	0.926	54	[1.041]		130/126	1.094	54	[1.060]		131/126	1.075	54	[1.044]		129/127	0.977	54	[1.034]		130/127	1.178	54	[1.066]		131/127	1.145	54	[1.046]		129/128	0.876	53	1.027	*	130/128	1.046
308	gi|363731606	PREDICTED: nidogen-1 [Gallus gallus]	1143	147625	45	40	15	13	13.7	5.07	0.36	Quantitation summary for protein	129/126	1.234	38	1.031	*	130/126	1.421	38	1.04	*	131/126	1.457	38	1.044	*	129/127	0.991	38	1.02	*	130/127	1.165	38	[1.044]		131/127	1.183	38	[1.040]		129/128	1.051	38	[1.028]		130/128	1.228
309	gi|50729086	PREDICTED: branched-chain-amino-acid aminotransferase, cytosolic [Gallus gallus]	1142	49239	41	31	9	7	26.7	5.58	1.04	Quantitation summary for protein	129/126	1.098	36	1.052	*	130/126	1.214	36	[1.080]		131/126	1.331	36	1.06	*	129/127	1.055	36	1.048	*	130/127	1.192	36	[1.071]		131/127	1.293	36	1.053	*	129/128	1.005	36	[1.028]		130/128	1.127
310	gi|60098425	hypothetical protein RCJMB04_2a4 [Gallus gallus]	1140	79279	54	45	18	15	30.1	6.54	1.44	Quantitation summary for protein	129/126	1.506	37	[1.079]		130/126	1.247	37	1.061	*	131/126	1.135	37	1.058	*	129/127	0.739	37	[1.044]		130/127	0.624	37	1.084	*	131/127	0.563	37	[1.090]		129/128	0.857	36	1.035	*	130/128	0.718
311	gi|310750374	pyruvate dehydrogenase E1 component subunit beta, mitochondrial [Gallus gallus]	1139	43433	35	32	9	9	30.1	5.95	1.6	Quantitation summary for protein	129/126	0.911	34	[1.080]		130/126	1.012	34	1.086		131/126	0.954	34	1.069	*	129/127	0.999	34	1.045		130/127	1.132	34	1.086	*	131/127	1.056	34	1.064	*	129/128	0.891	34	1.045	*	130/128	1.004
312	gi|50748536	PREDICTED: activator of 90 kDa heat shock protein ATPase homolog 1 isoform 2 [Gallus gallus]	1132	45526	37	33	10	9	35.3	5.61	1.16	Quantitation summary for protein	129/126	0.968	34	[1.050]		130/126	1.044	34	1.06	*	131/126	0.931	33	1.042	*	129/127	1.073	34	1.031	*	130/127	1.181	34	1.06	*	131/127	1.036	34	1.044	*	129/128	1.092	34	[1.043]		130/128	1.195
313	gi|3915686	RecName: Full=Farnesyl pyrophosphate synthase; Short=FPP synthase; Short=FPS; AltName: Full=(2E,6E)-farnesyl diphosphate synthase; AltName: Full=Dimethylallyltranstransferase; AltName: Full=Farnesyl diphosphate synthase; AltName: Full=Geranyltranstr	1122	48770	71	63	15	14	34.9	6.16	2.25	Quantitation summary for protein	129/126	0.89	65	1.058	*	130/126	0.717	65	[1.123]		131/126	0.739	65	[1.105]		129/127	1	65	[1.071]		130/127	0.822	65	[1.111]		131/127	0.838	65	[1.091]		129/128	0.696	65	[1.044]		130/128	0.569
314	gi|13992475	putative FK506-binding protein [Gallus gallus]	1122	33323	59	45	10	8	46.7	9.2	1.84	Quantitation summary for protein	129/126	1.146	54	[1.025]		130/126	1.158	53	1.02	*	131/126	1.3	54	[1.018]		129/127	1.119	54	[1.027]		130/127	1.155	54	[1.030]		131/127	1.282	54	[1.028]		129/128	0.946	53	1.013	*	130/128	0.973
315	gi|60098571	hypothetical protein RCJMB04_3m24 [Gallus gallus]	1120	123578	64	54	23	21	22.7	5.23	0.87	Quantitation summary for protein	129/126	1.045	55	[1.037]		130/126	0.871	55	[1.061]		131/126	0.857	55	[1.054]		129/127	1.109	55	1.025	*	130/127	0.943	55	[1.065]		131/127	0.918	55	1.048	*	129/128	1.261	55	1.029	*	130/128	1.066
316	gi|118102025	PREDICTED: dihydrolipoyllysine-residue acetyltransferase component of pyruvate dehydrogenase complex, mitochondrial [Gallus gallus]	1119	81269	57	50	17	15	30.5	8.84	1.21	Quantitation summary for protein	129/126	0.956	50	[1.029]		130/126	0.957	51	1.038	*	131/126	0.973	50	[1.047]		129/127	1.018	50	[1.033]		130/127	1.037	50	[1.055]		131/127	1.045	50	[1.055]		129/128	0.847	50	[1.033]		130/128	0.858
317	gi|363731461	PREDICTED: atlastin-2-like [Gallus gallus]	1118	78312	44	40	9	7	15.3	5.32	0.45	Quantitation summary for protein	129/126	0.893	43	1.037	*	130/126	1.072	43	[1.037]		131/126	0.949	43	1.042	*	129/127	1.019	42	1.03	*	130/127	1.244	43	1.058	*	131/127	1.089	43	1.055	*	129/128	1.07	43	1.033	*	130/128	1.303
318	gi|95931861	PACSIN 3 [Gallus gallus]	1113	61193	52	46	15	13	41.6	5.71	1.57	Quantitation summary for protein	129/126	1.093	50	[1.046]		130/126	0.904	50	1.068	*	131/126	0.945	50	1.054	*	129/127	1.308	50	[1.045]		130/127	1.104	50	1.066	*	131/127	1.142	50	1.054	*	129/128	1.036	50	[1.032]		130/128	0.869
319	gi|53134506	hypothetical protein RCJMB04_23e15 [Gallus gallus]	1113	84287	53	45	14	12	22.3	8.79	1.23	Quantitation summary for protein	129/126	0.983	51	[1.036]		130/126	1.192	51	[1.052]		131/126	0.866	50	1.04	*	129/127	0.92	51	[1.033]		130/127	1.138	51	[1.064]		131/127	0.814	51	1.058	*	129/128	1.01	51	1.031	*	130/128	1.242
320	gi|53134324	hypothetical protein RCJMB04_23a9 [Gallus gallus]	1109	42040	56	43	11	10	39.9	8.87	2.35	Quantitation summary for protein	129/126	1.048	45	1.044	*	130/126	0.891	46	[1.057]		131/126	1.051	46	[1.054]		129/127	0.983	46	1.03	*	130/127	0.859	46	[1.060]		131/127	1.003	46	[1.042]		129/128	0.916	46	[1.032]		130/128	0.796
321	gi|50731694	PREDICTED: 2,4-dienoyl-CoA reductase, mitochondrial [Gallus gallus]	1108	41795	43	43	9	9	28.9	9.46	1.31	Quantitation summary for protein	129/126	1.468	43	1.042	*	130/126	1.417	43	[1.071]		131/126	1.327	43	[1.036]		129/127	1.414	43	[1.046]		130/127	1.393	43	[1.075]		131/127	1.29	43	[1.027]		129/128	1.089	43	[1.024]		130/128	1.067
322	gi|1942538	Chain A, Myosin Subfragment-1, Alpha Carbon Coordinates Only For The Two Light Chains	1107	102607	62	49	13	13	16.1	4.93	0.93	Quantitation summary for protein	129/126	0.84	7	1.185	*	130/126	0.795	7	1.188	*	131/126	0.778	7	1.107	*	129/127	0.913	7	1.166		130/127	0.881	7	1.311		131/127	0.845	6	1.122	*	129/128	0.853	7	1.239		130/128	0.819
323	gi|60099043	hypothetical protein RCJMB04_21b18 [Gallus gallus]	1096	38982	37	35	8	8	30.4	6.6	1.45	Quantitation summary for protein	129/126	1.247	28	1.075	*	130/126	1.305	28	1.081	*	131/126	1.446	28	1.074	*	129/127	1.027	28	[1.082]		130/127	1.097	28	[1.078]		131/127	1.202	28	[1.059]		129/128	1.099	28	1.045	*	130/128	1.168
324	gi|363743552	PREDICTED: keratin, type I cytoskeletal 42-like [Gallus gallus]	1086	53750	69	55	5	4	7.8	4.79	0.92	Quantitation summary for protein	129/126	0.273	45	1.135	*	130/126	0.569	45	1.066	*	131/126	0.603	45	[1.065]		129/127	0.55	45	1.097	*	130/127	1.173	44	1.049	*	131/127	1.226	45	[1.062]		129/128	0.79	45	1.043	*	130/128	1.669
325	gi|10178878	eukaryote initiation factor 2 beta [Gallus gallus]	1080	49525	48	41	12	12	40.7	5.6	1.81	Quantitation summary for protein	129/126	1.59	41	[1.055]		130/126	1.081	41	1.072	*	131/126	1.142	41	1.054	*	129/127	1.728	41	[1.076]		130/127	1.199	41	1.076	*	131/127	1.253	41	1.052	*	129/128	0.922	41	[1.041]		130/128	0.636
326	gi|129270064	ribosomal protein S3A [Gallus gallus]	1078	39013	56	49	13	11	48.1	9.74	2.4	Quantitation summary for protein	129/126	1.33	53	1.029	*	130/126	1.324	53	[1.031]		131/126	1.323	53	[1.030]		129/127	0.883	53	1.022	*	130/127	0.897	53	[1.038]		131/127	0.887	53	1.03	*	129/128	1.013	53	[1.021]		130/128	1.023
327	gi|5823900	alpha-actinin associated LIM protein, skeletal muscle isoform (skALP) [Gallus gallus]	1071	35854	54	42	10	9	42.6	7	2.45	Quantitation summary for protein	129/126	1.833	9	1.13	*	130/126	1.422	9	1.072	*	131/126	1.413	9	1.125	*	129/127	2.165	9	1.124	*	130/127	1.714	9	1.091	*	131/127	1.686	9	1.083	*	129/128	1.57	9	1.094	*	130/128	1.235
328	gi|53133328	hypothetical protein RCJMB04_15i11 [Gallus gallus]	1070	52541	38	32	12	9	34.3	5.66	1.34	Quantitation summary for protein	129/126	1.063	35	[1.063]		130/126	0.89	33	1.047	*	131/126	0.85	35	[1.061]		129/127	0.996	35	[1.044]		130/127	0.847	35	[1.063]		131/127	0.804	35	[1.080]		129/128	1.047	35	[1.034]		130/128	0.885
329	gi|363733121	PREDICTED: peptidyl-prolyl cis-trans isomerase D [Gallus gallus]	1069	49790	42	39	12	11	34.1	5.98	1.79	Quantitation summary for protein	129/126	0.866	39	[1.087]		130/126	0.666	39	[1.059]		131/126	0.744	39	1.049	*	129/127	0.992	39	[1.047]		130/127	0.762	38	1.061	*	131/127	0.861	39	1.049	*	129/128	1.007	39	[1.031]		130/128	0.786
330	gi|461496478	40S ribosomal protein S2 [Gallus gallus]	1067	36669	47	41	16	14	51.4	10.25	4.18	Quantitation summary for protein	129/126	1.072	46	1.048	*	130/126	1.123	46	[1.063]		131/126	1.015	46	1.059		129/127	0.858	46	[1.058]		130/127	0.917	46	[1.105]		131/127	0.82	46	[1.093]		129/128	1.001	46	1.033		130/128	1.064
331	gi|53134709	hypothetical protein RCJMB04_23k2 [Gallus gallus]	1066	55703	52	40	17	16	44.1	5.11	3.71	Quantitation summary for protein	129/126	1.109	49	1.052	*	130/126	1.076	49	1.081	*	131/126	1.067	49	[1.067]		129/127	1.045	49	[1.060]		130/127	1.035	49	1.109	*	131/127	1.015	49	[1.092]		129/128	1.078	49	[1.055]		130/128	1.061
332	gi|363731918	PREDICTED: angiotensinogen [Gallus gallus]	1066	60581	41	36	14	12	30.7	5.41	1.21	Quantitation summary for protein	129/126	2.259	36	[1.090]		130/126	1.463	36	[1.043]		131/126	2.581	36	[1.100]		129/127	2.431	36	[1.088]		130/127	1.606	36	1.05	*	131/127	2.805	36	1.098	*	129/128	2.005	36	1.063	*	130/128	1.316
333	gi|53127520	hypothetical protein RCJMB04_2m6 [Gallus gallus]	1065	23600	41	38	6	6	35.4	6.84	2.29	Quantitation summary for protein	129/126	1.118	14	[1.048]		130/126	1.001	14	1.076		131/126	0.923	14	1.058	*	129/127	1.134	14	[1.037]		130/127	1.036	14	[1.074]		131/127	0.921	13	1.032	*	129/128	1.418	14	1.039	*	130/128	1.287
334	gi|1333620	paraoxonase 2 [Gallus gallus]	1055	44367	38	34	11	11	46.3	5.11	1.93	Quantitation summary for protein	129/126	1.011	6	1.057		130/126	1.034	6	1.097		131/126	1.066	6	1.075		129/127	1.096	6	1.03	*	130/127	1.144	6	1.117	*	131/127	1.167	6	1.086	*	129/128	1.037	5	1.031		130/128	1.044
335	gi|50746905	PREDICTED: 3-hydroxybutyrate dehydrogenase type 2 [Gallus gallus]	1051	31085	40	39	7	6	28.6	6.84	1.25	Quantitation summary for protein	129/126	0.751	39	[1.037]		130/126	0.814	39	[1.045]		131/126	0.804	39	[1.036]		129/127	0.79	39	[1.041]		130/127	0.874	39	[1.049]		131/127	0.853	38	1.035	*	129/128	0.866	39	[1.031]		130/128	0.952
336	gi|516684	unnamed protein product [Gallus gallus]	1043	30396	67	61	11	11	44.5	11.75	3.74	Quantitation summary for protein	129/126	2.031	62	1.071	*	130/126	1.631	62	[1.053]		131/126	1.547	62	[1.058]		129/127	1.084	62	[1.044]		130/127	0.889	62	1.057	*	131/127	0.857	61	1.029	*	129/128	1.082	62	[1.040]		130/128	0.882
337	gi|3342404	lactate dehydrogenase H subunit [Gallus gallus]	1042	42652	78	63	16	15	42.6	7.07	3.13	Quantitation summary for protein	129/126	0.999	35	[1.045]		130/126	1.124	35	[1.213]		131/126	0.929	35	[1.123]		129/127	1.025	35	1.031	*	130/127	1.177	35	[1.213]		131/127	0.963	35	[1.117]		129/128	1.059	34	1.047	*	130/128	1.198
338	gi|53133620	hypothetical protein RCJMB04_18k11 [Gallus gallus]	1042	29887	56	43	13	11	46.9	5.72	3.88	Quantitation summary for protein	129/126	0.896	51	1.039	*	130/126	0.989	51	[1.073]		131/126	0.817	51	1.058	*	129/127	1.015	51	[1.036]		130/127	1.142	51	1.09	*	131/127	0.934	51	1.071	*	129/128	0.96	51	1.028	*	130/128	1.075
339	gi|363731790	PREDICTED: leucine-rich PPR motif-containing protein, mitochondrial [Gallus gallus]	1038	180560	55	48	18	17	12.3	6.68	0.38	Quantitation summary for protein	129/126	1.181	50	1.029	*	130/126	1.089	50	1.04	*	131/126	0.983	50	[1.042]		129/127	0.8	50	1.03	*	130/127	0.752	50	1.049	*	131/127	0.672	50	1.054	*	129/128	1.069	50	[1.024]		130/128	0.999
340	gi|53130584	hypothetical protein RCJMB04_8n6 [Gallus gallus]	1035	51535	46	35	14	8	35.2	6.74	1.38	Quantitation summary for protein	129/126	1.178	38	1.041	*	130/126	0.972	38	[1.040]		131/126	1.002	37	1.029		129/127	1.152	38	1.034	*	130/127	0.97	38	[1.048]		131/127	0.997	38	1.036		129/128	1.034	38	1.036	*	130/128	0.866
341	gi|53136570	hypothetical protein RCJMB04_31a13 [Gallus gallus]	1035	46685	62	53	11	10	32.7	7.6	1.98	Quantitation summary for protein	129/126	0.943	62	[1.051]		130/126	0.974	62	[1.061]		131/126	1.066	62	[1.046]		129/127	0.955	62	1.036	*	130/127	1.007	62	1.052		131/127	1.091	62	1.043	*	129/128	0.934	62	[1.031]		130/128	0.979
342	gi|50732309	PREDICTED: kinesin-1 heavy chain [Gallus gallus]	1035	133560	52	41	23	18	24.4	6.06	0.7	Quantitation summary for protein	129/126	1.052	45	[1.042]		130/126	1.034	45	1.053	*	131/126	0.952	45	[1.044]		129/127	0.968	45	1.026	*	130/127	0.972	45	1.062	*	131/127	0.885	45	[1.037]		129/128	1.011	45	1.02	*	130/128	1.009
343	gi|60098883	hypothetical protein RCJMB04_14f6 [Gallus gallus]	1034	51981	52	39	12	10	35.3	7.86	0.97	Quantitation summary for protein	129/126	0.816	38	[1.041]		130/126	1.217	38	1.062	*	131/126	1.405	38	1.04	*	129/127	0.6	39	[1.063]		130/127	0.913	39	1.084	*	131/127	1.043	39	1.042	*	129/128	0.599	39	1.067	*	130/128	0.906
344	gi|363738636	PREDICTED: dolichyl-diphosphooligosaccharide--protein glycosyltransferase subunit 1, partial [Gallus gallus]	1033	71113	42	35	11	11	20.1	6.42	0.88	Quantitation summary for protein	129/126	1.012	39	1.028	*	130/126	0.949	39	1.026	*	131/126	1.066	39	1.024	*	129/127	0.919	39	[1.024]		130/127	0.879	39	1.032	*	131/127	0.978	38	1.019	*	129/128	1.124	39	[1.015]		130/128	1.068
345	gi|50757609	PREDICTED: dehydrogenase/reductase SDR family member 7C [Gallus gallus]	1027	39222	32	30	8	8	28.6	8.18	1.44	Quantitation summary for protein	129/126	0.886	30	[1.032]		130/126	1.062	30	1.059	*	131/126	0.892	30	1.04	*	129/127	0.91	30	[1.029]		130/127	1.115	30	1.074	*	131/127	0.926	30	1.056	*	129/128	1.081	30	[1.034]		130/128	1.315
346	gi|44969758	eukaryotic translation elongation factor 1 [Gallus gallus]	1025	57199	45	37	11	8	23.9	6.12	0.96	Quantitation summary for protein	129/126	1.069	44	1.039	*	130/126	0.879	44	1.054	*	131/126	0.898	44	1.045	*	129/127	0.941	44	1.027	*	130/127	0.79	44	1.06	*	131/127	0.798	44	1.053	*	129/128	0.945	44	[1.029]		130/128	0.788
347	gi|363747068	PREDICTED: LOW QUALITY PROTEIN: transgelin-2-like [Gallus gallus]	1023	24921	36	33	11	10	56.8	9.03	4.8	Quantitation summary for protein	129/126	0.994	33	1.076		130/126	0.994	33	[1.043]		131/126	1.059	33	1.047	*	129/127	0.968	33	[1.070]		130/127	0.989	33	[1.068]		131/127	1.042	33	[1.050]		129/128	1.064	33	[1.046]		130/128	1.081
348	gi|53133820	hypothetical protein RCJMB04_20k5 [Gallus gallus]	1023	68091	39	37	16	15	36.6	6.36	1.69	Quantitation summary for protein	129/126	0.951	39	1.034	*	130/126	0.969	38	1.071	*	131/126	0.932	38	[1.052]		129/127	0.873	39	1.037	*	130/127	0.907	38	1.08	*	131/127	0.863	38	1.054	*	129/128	0.937	39	[1.034]		130/128	0.967
349	gi|3136063	20S proteasome subunit C2 [Gallus gallus]	1022	32400	40	32	10	8	37.7	6.08	1.65	Quantitation summary for protein	129/126	1.126	33	1.047	*	130/126	0.855	33	[1.052]		131/126	0.963	33	[1.048]		129/127	1.17	33	[1.050]		130/127	0.908	33	[1.044]		131/127	1.011	33	[1.037]		129/128	0.915	33	1.024	*	130/128	0.706
350	gi|53129929	hypothetical protein RCJMB04_6f1 [Gallus gallus]	1022	45199	38	31	11	9	29.7	8.34	1.68	Quantitation summary for protein	129/126	0.721	35	1.053	*	130/126	0.947	35	1.108	*	131/126	0.89	35	1.077	*	129/127	0.842	35	[1.047]		130/127	1.129	35	1.126	*	131/127	1.049	35	1.095	*	129/128	0.918	35	[1.049]		130/128	1.223
351	gi|5006901	6-phosphofructo-2-kinase/fructose-2, 6-bisphosphatase [Gallus gallus]	1021	59294	44	39	11	11	28.5	6.82	0.91	Quantitation summary for protein	129/126	1.046	41	1.046	*	130/126	0.898	41	1.094	*	131/126	0.858	41	1.08	*	129/127	1.043	41	1.039	*	130/127	0.914	41	1.105	*	131/127	0.865	41	1.081	*	129/128	1.008	41	1.041		130/128	0.877
352	gi|363736352	PREDICTED: LOW QUALITY PROTEIN: 14 kDa phosphohistidine phosphatase [Gallus gallus]	1018	16615	53	45	7	6	60	7.77	5.37	Quantitation summary for protein	129/126	0.668	51	[1.036]		130/126	0.776	51	1.039	*	131/126	0.779	51	[1.043]		129/127	0.896	50	1.021	*	130/127	1.064	51	1.043	*	131/127	1.057	51	[1.040]		129/128	0.874	51	1.03	*	130/128	1.031
353	gi|397529551	ras-related protein Rab-1A [Gallus gallus]	1014	27046	51	36	12	8	53.7	5.93	5.41	Quantitation summary for protein	129/126	0.98	35	1.058	*	130/126	0.865	35	1.074	*	131/126	0.79	35	1.067	*	129/127	1.018	35	[1.047]		130/127	0.917	35	1.083	*	131/127	0.829	35	1.072	*	129/128	1.347	35	[1.045]		130/128	1.206
354	gi|63778	ribosomal protein L7a [Gallus gallus]	1011	39376	44	39	9	8	30.1	10.51	1.63	Quantitation summary for protein	129/126	1.962	40	1.074	*	130/126	1.679	40	1.095	*	131/126	1.616	40	1.073	*	129/127	1.148	40	[1.052]		130/127	1.002	40	[1.100]		131/127	0.955	40	[1.087]		129/128	1.149	40	[1.044]		130/128	0.997
355	gi|363735591	PREDICTED: eukaryotic translation initiation factor 3 subunit A [Gallus gallus]	1010	185080	91	69	29	25	21.3	6.74	0.63	Quantitation summary for protein	129/126	1.231	72	[1.035]		130/126	1.337	72	[1.039]		131/126	1.075	70	1.027	*	129/127	0.856	72	[1.029]		130/127	0.949	72	1.031	*	131/127	0.764	72	1.031	*	129/128	1.006	72	[1.020]		130/128	1.108
356	gi|50730713	PREDICTED: ES1 protein homolog, mitochondrial isoform 2 [Gallus gallus]	1009	28611	48	41	10	10	45.8	6.17	3.66	Quantitation summary for protein	129/126	0.806	36	[1.091]		130/126	0.7	35	[1.092]		131/126	0.714	36	1.058	*	129/127	1.139	36	1.045	*	130/127	1.009	35	[1.105]		131/127	1.018	36	1.068		129/128	0.993	36	1.043		130/128	0.875
357	gi|53133917	hypothetical protein RCJMB04_21p3 [Gallus gallus]	1008	72765	66	48	20	17	35.1	6.24	1.52	Quantitation summary for protein	129/126	1.12	52	1.029	*	130/126	0.803	52	[1.039]		131/126	0.965	52	1.028	*	129/127	1.137	52	[1.023]		130/127	0.832	52	1.042	*	131/127	0.989	52	[1.030]		129/128	1.039	52	[1.015]		130/128	0.756
358	gi|118082912	PREDICTED: tRNA-splicing ligase RtcB homolog [Gallus gallus]	1007	63053	42	39	14	14	32.1	6.79	1.5	Quantitation summary for protein	129/126	0.971	40	1.039	*	130/126	1.339	41	[1.068]		131/126	1.366	41	[1.051]		129/127	0.828	41	[1.045]		130/127	1.162	41	[1.076]		131/127	1.173	41	[1.053]		129/128	0.887	41	[1.042]		130/128	1.238
359	gi|356582452	phosphoserine phosphatase [Gallus gallus]	1007	29022	39	33	7	7	34.1	6	1.97	Quantitation summary for protein	129/126	1.062	35	1.032	*	130/126	0.697	35	[1.062]		131/126	0.922	34	1.031	*	129/127	0.966	35	1.032	*	130/127	0.647	35	[1.078]		131/127	0.787	35	1.057	*	129/128	0.894	35	1.033	*	130/128	0.595
360	gi|53136456	hypothetical protein RCJMB04_29e19 [Gallus gallus]	1006	51226	51	44	11	9	31.9	4.51	1.55	Quantitation summary for protein	129/126	1.176	45	[1.043]		130/126	1.002	45	1.038		131/126	0.878	45	1.043	*	129/127	0.972	45	1.027	*	130/127	0.846	45	[1.054]		131/127	0.733	45	1.054	*	129/128	0.885	44	1.027	*	130/128	0.765
361	gi|118084667	PREDICTED: tripeptidyl-peptidase 2 [Gallus gallus]	1001	158414	66	56	22	18	20.8	5.95	0.57	Quantitation summary for protein	129/126	1.068	62	[1.040]		130/126	1.222	62	[1.097]		131/126	1.001	62	[1.031]		129/127	1.167	62	[1.040]		130/127	1.364	62	[1.105]		131/127	1.105	62	[1.038]		129/128	1.065	62	1.019	*	130/128	1.237
362	gi|115579	RecName: Full=F-actin-capping protein subunit alpha-2; AltName: Full=Beta-actinin subunit I; AltName: Full=CapZ 36/32	999	38209	41	32	7	5	33.6	5.54	1.71	Quantitation summary for protein	129/126	1.142	26	[1.059]		130/126	1.219	26	[1.068]		131/126	1.401	26	1.052	*	129/127	1.782	26	1.129	*	130/127	1.942	26	1.145	*	131/127	2.209	26	1.14	*	129/128	1.501	19	1.042	*	130/128	1.62
363	gi|53131982	hypothetical protein RCJMB04_12i19 [Gallus gallus]	999	48212	58	50	11	10	31.8	8.09	1.37	Quantitation summary for protein	129/126	0.761	52	[1.039]		130/126	0.781	52	[1.072]		131/126	0.711	52	[1.060]		129/127	1.044	52	[1.033]		130/127	1.094	52	[1.081]		131/127	0.986	52	[1.062]		129/128	0.959	52	[1.039]		130/128	0.999
364	gi|118092131	PREDICTED: alpha-1-antichymotrypsin [Gallus gallus]	999	54652	45	38	9	9	26.3	5.7	1.02	Quantitation summary for protein	129/126	6.282	38	[1.204]		130/126	1.927	38	1.104	*	131/126	3.711	38	1.154	*	129/127	6.949	39	[1.183]		130/127	2.207	39	1.112	*	131/127	4.166	39	1.149	*	129/128	3.22	39	[1.102]		130/128	1.014
365	gi|363737120	PREDICTED: cullin-3, partial [Gallus gallus]	998	103337	52	45	14	12	18.8	8.68	0.5	Quantitation summary for protein	129/126	0.855	48	[1.034]		130/126	0.823	48	[1.057]		131/126	0.751	48	1.04	*	129/127	0.989	48	1.027	*	130/127	0.972	48	1.056	*	131/127	0.875	47	1.038	*	129/128	1.05	48	[1.032]		130/128	1.025
366	gi|363736976	PREDICTED: protein phosphatase 1 regulatory subunit 7 [Gallus gallus]	996	45915	37	35	12	12	40.4	4.88	2.03	Quantitation summary for protein	129/126	0.965	37	[1.055]		130/126	0.912	37	[1.069]		131/126	0.855	37	[1.051]		129/127	0.908	37	1.037	*	130/127	0.877	37	[1.087]		131/127	0.813	37	[1.048]		129/128	0.882	36	1.032	*	130/128	0.846
367	gi|363742992	PREDICTED: voltage-dependent L-type calcium channel subunit alpha-1S [Gallus gallus]	994	230134	48	40	14	12	8.3	6.12	0.25	Quantitation summary for protein	129/126	1.01	32	1.056		130/126	0.723	32	1.136	*	131/126	0.733	32	[1.104]		129/127	1.13	32	[1.045]		130/127	0.825	32	1.153	*	131/127	0.829	32	1.12	*	129/128	1.172	32	[1.021]		130/128	0.851
368	gi|6855513	syndesmos [Gallus gallus]	992	36270	43	38	9	8	28.8	5.74	2.11	Quantitation summary for protein	129/126	0.895	39	[1.067]		130/126	0.854	38	1.077	*	131/126	0.84	38	[1.071]		129/127	0.913	39	[1.054]		130/127	0.889	38	1.06	*	131/127	0.866	38	1.051	*	129/128	0.95	39	[1.053]		130/128	0.92
369	gi|228312418	Chain F, Cytochrome Bc1 Complex From Chicken	984	16339	32	27	6	6	40.9	9.25	2.75	Quantitation summary for protein	129/126	0.911	25	[1.056]		130/126	0.864	25	[1.115]		131/126	0.853	25	[1.067]		129/127	0.953	25	[1.024]		130/127	0.923	25	[1.149]		131/127	0.901	25	[1.097]		129/128	0.753	25	[1.032]		130/128	0.724
370	gi|53128405	hypothetical protein RCJMB04_4n15 [Gallus gallus]	980	111905	62	54	22	21	26.7	5.14	1.18	Quantitation summary for protein	129/126	1.129	48	1.03	*	130/126	0.99	48	[1.046]		131/126	0.992	48	[1.040]		129/127	1.084	48	[1.030]		130/127	0.971	48	[1.038]		131/127	0.962	48	1.032	*	129/128	1.233	48	[1.029]		130/128	1.097
371	gi|310772242	CD99 antigen precursor [Gallus gallus]	977	20994	21	20	4	4	34.1	4.81	1.44	Quantitation summary for protein	129/126	1.028	20	1.061	*	130/126	0.841	20	[1.160]		131/126	0.896	19	1.065	*	129/127	1.054	18	1.069	*	130/127	0.892	20	[1.134]		131/127	0.932	20	1.084	*	129/128	1.017	21	1.071		130/128	0.849
372	gi|60099031	hypothetical protein RCJMB04_20k15 [Gallus gallus]	975	61405	41	38	10	9	21.6	8.99	0.87	Quantitation summary for protein	129/126	1.005	40	[1.038]		130/126	1.159	40	[1.023]		131/126	1.057	40	[1.024]		129/127	0.988	40	[1.046]		130/127	1.163	40	1.026	*	131/127	1.049	40	1.018	*	129/128	1.065	40	[1.048]		130/128	1.245
373	gi|363743079	PREDICTED: ATP synthase subunit b, mitochondrial [Gallus gallus]	971	34198	45	39	11	10	36.9	9.23	4.3	Quantitation summary for protein	129/126	0.885	41	1.05	*	130/126	1.292	40	[1.081]		131/126	1.119	41	[1.062]		129/127	0.894	41	[1.061]		130/127	1.331	40	[1.072]		131/127	1.141	41	1.053	*	129/128	1.026	42	[1.047]		130/128	1.523
374	gi|53127678	hypothetical protein RCJMB04_2o24 [Gallus gallus]	971	68003	51	36	14	13	31.9	6.11	1.23	Quantitation summary for protein	129/126	0.975	45	1.047	*	130/126	0.898	44	[1.084]		131/126	0.956	45	1.063	*	129/127	1.074	43	1.041	*	130/127	1.011	44	[1.080]		131/127	1.065	44	1.065	*	129/128	1.103	45	1.039	*	130/128	1.029
375	gi|53127099	hypothetical protein RCJMB04_1i23 [Gallus gallus]	965	37899	55	44	18	18	63.1	9.89	7.14	Quantitation summary for protein	129/126	0.945	47	1.059	*	130/126	0.954	47	[1.078]		131/126	0.968	47	1.066	*	129/127	0.882	47	[1.056]		130/127	0.909	47	[1.085]		131/127	0.913	47	[1.073]		129/128	0.813	47	1.035	*	130/128	0.833
376	gi|86371685	X,K-ATPase beta-m subunit [Gallus gallus]	965	41894	39	36	4	3	10.9	7.98	0.7	Quantitation summary for protein	129/126	1.009	38	1.04		130/126	1.306	38	1.049	*	131/126	1.327	38	1.044	*	129/127	0.939	38	1.037	*	130/127	1.24	38	1.06	*	131/127	1.247	38	1.045	*	129/128	1.181	38	1.03	*	130/128	1.549
377	gi|310750341	ubiquinone biosynthesis protein COQ9, mitochondrial [Gallus gallus]	964	37304	27	26	5	5	21.5	5.18	1.15	Quantitation summary for protein	129/126	1.026	27	1.08		130/126	1.059	27	1.071	*	131/126	1.105	27	[1.105]		129/127	0.89	27	1.079	*	130/127	0.938	27	[1.083]		131/127	0.968	25	1.059	*	129/128	0.863	26	1.068	*	130/128	0.906
378	gi|118098353	PREDICTED: clathrin heavy chain 1 [Gallus gallus]	962	214434	62	53	25	23	14.3	5.54	0.46	Quantitation summary for protein	129/126	1.168	15	1.048	*	130/126	1.159	14	1.037	*	131/126	0.957	16	[1.069]		129/127	0.894	16	1.026	*	130/127	0.908	16	[1.126]		131/127	0.743	16	[1.136]		129/128	1.031	16	1.056	*	130/128	1.04
379	gi|53133360	hypothetical protein RCJMB04_15n8 [Gallus gallus]	960	62658	33	30	8	8	25.6	5.52	0.59	Quantitation summary for protein	129/126	0.902	31	[1.031]		130/126	0.875	31	[1.055]		131/126	0.825	31	1.04	*	129/127	0.943	30	1.024	*	130/127	0.938	31	[1.055]		131/127	0.875	31	1.043	*	129/128	1.092	31	[1.021]		130/128	1.074
380	gi|33521618	heterogeneous nuclear ribonucleoprotein H1-like protein [Gallus gallus]	958	60941	41	36	8	8	17.1	5.38	0.52	Quantitation summary for protein	129/126	1.234	31	1.04	*	130/126	1.205	30	1.031	*	131/126	1.315	31	[1.042]		129/127	0.847	31	[1.052]		130/127	0.834	31	1.065	*	131/127	0.912	31	1.061	*	129/128	1.037	31	[1.025]		130/128	1.014
381	gi|355330274	receptor expression-enhancing protein 5 [Gallus gallus]	958	25136	39	34	8	6	28.6	6.82	1.72	Quantitation summary for protein	129/126	0.915	35	1.034	*	130/126	1.017	35	[1.057]		131/126	0.909	35	1.035	*	129/127	0.86	35	1.023	*	130/127	0.975	35	[1.066]		131/127	0.862	35	[1.032]		129/128	1.088	35	[1.042]		130/128	1.226
382	gi|53128824	hypothetical protein RCJMB04_5d11 [Gallus gallus]	954	32587	66	53	12	11	44.3	4.76	5.94	Quantitation summary for protein	129/126	1.038	8	1.115		130/126	0.884	8	1.106	*	131/126	1.067	8	1.056	*	129/127	1.043	8	1.129		130/127	0.971	7	1.089		131/127	1.083	8	[1.069]		129/128	0.99	8	1.1		130/128	0.818
383	gi|118453	RecName: Full=Desmin	953	58575	44	38	14	12	29.4	5.45	1.4	Quantitation summary for protein	129/126	2.078	6	1.131	*	130/126	1.389	6	1.092	*	131/126	1.504	6	1.104	*	129/127	1.31	6	[1.077]		130/127	0.894	6	1.09	*	131/127	0.958	6	1.054		129/128	0.742	6	1.057	*	130/128	0.503
384	gi|343790924	aldo-keto reductase family 1, member B1-like [Gallus gallus]	952	42659	62	48	11	11	30.1	7.14	2.83	Quantitation summary for protein	129/126	0.772	7	1.168	*	130/126	0.572	7	1.117	*	131/126	0.688	7	1.18	*	129/127	1.049	7	1.138		130/127	0.793	7	1.14	*	131/127	0.945	7	1.147		129/128	0.958	5	1.021	*	130/128	0.753
385	gi|363727400	PREDICTED: ATP synthase subunit gamma, mitochondrial isoform 2 [Gallus gallus]	948	38717	49	39	13	12	37.8	9.44	3.37	Quantitation summary for protein	129/126	0.923	42	1.045	*	130/126	1.085	42	[1.064]		131/126	1.051	42	[1.071]		129/127	0.862	42	1.033	*	130/127	1.034	42	[1.067]		131/127	0.991	42	[1.070]		129/128	0.842	42	[1.042]		130/128	1.003
386	gi|118101731	PREDICTED: polyadenylate-binding protein 4 [Gallus gallus]	945	80584	46	41	15	14	22.4	9.55	1.05	Quantitation summary for protein	129/126	1.229	33	1.056	*	130/126	1.101	33	[1.063]		131/126	1.158	33	1.053	*	129/127	0.923	33	[1.061]		130/127	0.844	33	[1.075]		131/127	0.878	33	1.065	*	129/128	1.009	33	1.027		130/128	0.917
387	gi|53135834	hypothetical protein RCJMB04_25p23 [Gallus gallus]	943	59610	53	42	17	10	27.6	11.11	1.77	Quantitation summary for protein	129/126	1.672	46	1.074	*	130/126	1.793	46	[1.131]		131/126	1.654	46	[1.101]		129/127	0.924	46	[1.047]		130/127	1.012	46	[1.144]		131/127	0.924	46	[1.110]		129/128	1.199	46	1.035	*	130/128	1.305
388	gi|53130428	hypothetical protein RCJMB04_7m18 [Gallus gallus]	942	17670	41	39	5	5	36.4	6.55	1.86	Quantitation summary for protein	129/126	1.331	39	[1.064]		130/126	0.805	39	1.057	*	131/126	0.77	39	1.06	*	129/127	1.561	39	[1.060]		130/127	0.964	39	[1.063]		131/127	0.912	39	[1.063]		129/128	0.979	39	[1.031]		130/128	0.6
389	gi|363727488	PREDICTED: laminin subunit beta-1 [Gallus gallus]	937	222223	57	48	22	18	12.9	4.84	0.42	Quantitation summary for protein	129/126	1.044	57	[1.027]		130/126	1.184	57	1.04	*	131/126	1.182	57	[1.029]		129/127	0.856	57	[1.027]		130/127	0.99	57	1.044		131/127	0.978	57	[1.031]		129/128	0.867	57	[1.021]		130/128	0.996
390	gi|363729598	PREDICTED: glucose 1,6-bisphosphate synthase [Gallus gallus]	934	82745	52	41	16	13	25.4	6.04	0.79	Quantitation summary for protein	129/126	0.799	46	[1.062]		130/126	0.709	46	[1.063]		131/126	0.658	46	1.048	*	129/127	0.943	46	[1.056]		130/127	0.854	46	[1.070]		131/127	0.78	45	1.044	*	129/128	1.054	46	1.031	*	130/128	0.948
391	gi|363743385	PREDICTED: LOW QUALITY PROTEIN: 26S proteasome non-ATPase regulatory subunit 11 [Gallus gallus]	931	63139	58	49	16	15	35.2	5.96	1.37	Quantitation summary for protein	129/126	1.133	55	1.029	*	130/126	0.969	55	[1.027]		131/126	0.981	55	1.027	*	129/127	1.026	55	[1.019]		130/127	0.896	55	1.033	*	131/127	0.897	55	1.029	*	129/128	1.114	55	[1.019]		130/128	0.966
392	gi|363730685	PREDICTED: NADH dehydrogenase [ubiquinone] flavoprotein 2, mitochondrial isoform 2 [Gallus gallus]	929	31213	36	36	7	7	33.9	8.16	2.05	Quantitation summary for protein	129/126	0.984	34	1.106		130/126	0.949	34	[1.130]		131/126	0.882	34	[1.132]		129/127	1.032	34	[1.084]		130/127	1.016	34	[1.129]		131/127	0.957	33	1.11	*	129/128	0.846	34	1.072	*	130/128	0.827
393	gi|17433708	RecName: Full=Cofilin-2; AltName: Full=Cofilin, muscle isoform	928	24493	71	50	15	14	78.9	7.66	15.62	Quantitation summary for protein	129/126	1.033	51	[1.052]		130/126	1.065	51	1.075	*	131/126	0.991	51	1.055		129/127	1.107	51	[1.068]		130/127	1.165	51	[1.114]		131/127	1.072	51	1.067	*	129/128	0.974	50	1.034	*	130/128	1.016
394	gi|363743473	PREDICTED: 60S ribosomal protein L23 isoform 2 [Gallus gallus]	928	18637	22	20	3	3	23.6	10.51	1.3	Quantitation summary for protein	129/126	1.295	22	1.042	*	130/126	0.933	22	[1.069]		131/126	0.971	22	[1.056]		129/127	0.779	22	1.035	*	130/127	0.573	22	[1.088]		131/127	0.59	22	1.067	*	129/128	0.829	22	[1.035]		130/128	0.606
395	gi|53129915	hypothetical protein RCJMB04_6e4 [Gallus gallus]	928	37997	60	49	12	10	36.2	9.73	2.51	Quantitation summary for protein	129/126	0.828	4	1.151		130/126	1.202	4	1.096	*	131/126	0.899	4	1.137		129/127	0.925	4	1.04	*	130/127	0.932	3	1.066		131/127	1.014	4	1.02		129/128	1.081	4	1.043	*	130/128	1.593
396	gi|53136720	hypothetical protein RCJMB04_32o10 [Gallus gallus]	927	34987	71	49	10	6	27.8	6.67	2.89	Quantitation summary for protein	129/126	1.009	62	1.034	*	130/126	0.976	62	[1.074]		131/126	0.869	61	1.036	*	129/127	0.967	61	1.032	*	130/127	0.956	62	[1.073]		131/127	0.842	62	1.038	*	129/128	0.862	62	[1.026]		130/128	0.846
397	gi|363742669	PREDICTED: hepatoma-derived growth factor [Gallus gallus]	923	34653	52	41	14	13	55.2	5.1	2.94	Quantitation summary for protein	129/126	1.039	47	[1.069]		130/126	0.813	47	[1.081]		131/126	0.962	47	[1.081]		129/127	1.168	47	[1.060]		130/127	0.933	47	[1.072]		131/127	1.092	47	[1.060]		129/128	1.017	47	1.039	*	130/128	0.807
398	gi|50737088	PREDICTED: ubiquitin carboxyl-terminal hydrolase 14 isoform 2 [Gallus gallus]	920	65905	56	44	16	11	32.3	5.09	1.07	Quantitation summary for protein	129/126	1.027	47	1.02	*	130/126	1.011	47	[1.111]		131/126	0.865	47	[1.032]		129/127	1.105	47	[1.025]		130/127	1.11	47	[1.124]		131/127	0.94	47	[1.036]		129/128	1.123	47	[1.021]		130/128	1.121
399	gi|363747261	PREDICTED: poly(rC)-binding protein 2-like isoform 1 [Gallus gallus]	919	41418	48	40	11	10	35.9	7	2.42	Quantitation summary for protein	129/126	1.335	45	[1.045]		130/126	1.177	44	[1.081]		131/126	1.278	45	1.06	*	129/127	0.963	45	1.03	*	130/127	0.869	45	[1.093]		131/127	0.934	46	[1.063]		129/128	1.023	46	[1.037]		130/128	0.917
400	gi|53136198	hypothetical protein RCJMB04_27f19 [Gallus gallus]	919	50614	38	34	10	9	33.4	6.19	1.42	Quantitation summary for protein	129/126	0.949	23	1.029	*	130/126	0.877	23	1.049	*	131/126	0.822	24	1.036	*	129/127	1.032	24	[1.030]		130/127	0.963	24	1.058	*	131/127	0.901	24	1.034	*	129/128	1.079	24	1.045	*	130/128	1.001
401	gi|57157215	eIF4G-related protein NAT1 [Gallus gallus]	918	114456	55	49	20	18	23.4	6.57	0.97	Quantitation summary for protein	129/126	1.353	51	[1.051]		130/126	1.161	51	[1.066]		131/126	1.117	51	[1.051]		129/127	0.906	51	[1.029]		130/127	0.794	51	[1.086]		131/127	0.755	51	[1.057]		129/128	0.988	51	1.022	*	130/128	0.86
402	gi|53129801	hypothetical protein RCJMB04_6c17 [Gallus gallus]	918	56911	37	32	9	8	19.2	7.11	0.86	Quantitation summary for protein	129/126	1.185	25	1.071	*	130/126	1.049	25	1.065	*	131/126	1.491	25	[1.071]		129/127	0.924	25	[1.021]		130/127	0.835	25	1.069	*	131/127	1.174	25	1.081	*	129/128	1.033	25	1.031	*	130/128	0.929
403	gi|53133318	hypothetical protein RCJMB04_15g7 [Gallus gallus]	914	23343	35	26	10	7	45	8.91	4	Quantitation summary for protein	129/126	0.87	27	[1.114]		130/126	0.876	27	1.084	*	131/126	0.955	27	[1.086]		129/127	0.941	27	1.047	*	130/127	0.966	27	[1.113]		131/127	1.043	27	[1.092]		129/128	0.984	27	[1.086]		130/128	1.004
404	gi|17025728	tax-responsive element binding protein 107 [Gallus gallus]	914	47423	29	27	10	9	33.6	10.67	1.1	Quantitation summary for protein	129/126	1.772	28	1.109	*	130/126	1.586	28	1.08	*	131/126	1.628	27	1.081	*	129/127	1.015	28	[1.047]		130/127	0.927	28	[1.067]		131/127	0.94	27	[1.049]		129/128	1.112	28	[1.039]		130/128	1.01
405	gi|53136145	hypothetical protein RCJMB04_27c17 [Gallus gallus]	913	83851	44	33	8	5	12.3	8.93	0.36	Quantitation summary for protein	129/126	1.127	18	[1.030]		130/126	0.963	18	1.024	*	131/126	0.96	18	1.034	*	129/127	1.011	18	[1.033]		130/127	0.881	18	1.027	*	131/127	0.878	17	1.021	*	129/128	1.011	18	1.022	*	130/128	0.877
406	gi|5733818	gephyrin [Gallus gallus]	913	88376	36	33	10	10	18.6	5.45	0.55	Quantitation summary for protein	129/126	1.349	36	[1.080]		130/126	1.295	36	[1.069]		131/126	1.328	36	[1.094]		129/127	1.151	36	[1.066]		130/127	1.127	36	[1.093]		131/127	1.144	36	[1.084]		129/128	1.094	36	[1.061]		130/128	1.065
407	gi|53129746	hypothetical protein RCJMB04_6b22 [Gallus gallus]	912	33274	36	35	8	7	28.6	4.93	1.59	Quantitation summary for protein	129/126	1.008	35	[1.034]		130/126	0.758	35	[1.080]		131/126	0.942	35	1.051	*	129/127	1.045	34	1.03	*	130/127	0.798	35	[1.084]		131/127	0.982	35	1.06		129/128	0.9	35	1.031	*	130/128	0.686
408	gi|88909244	RecName: Full=Prohibitin	910	32914	46	38	14	13	60.3	5.57	8.09	Quantitation summary for protein	129/126	0.974	40	1.033	*	130/126	1.014	40	1.05		131/126	0.999	41	1.047		129/127	0.934	41	1.037	*	130/127	0.993	41	1.04		131/127	0.969	41	1.047	*	129/128	0.884	42	1.031	*	130/128	0.934
409	gi|60098385	hypothetical protein RCJMB04_1e2 [Gallus gallus]	909	34920	48	36	11	9	39.4	5.53	2.25	Quantitation summary for protein	129/126	0.821	41	[1.096]		130/126	0.973	41	1.056	*	131/126	0.943	41	1.053	*	129/127	0.823	41	[1.100]		130/127	0.996	41	[1.074]		131/127	0.954	41	[1.072]		129/128	0.841	39	1.04	*	130/128	1.009
410	gi|50755563	PREDICTED: 28 kDa heat- and acid-stable phosphoprotein [Gallus gallus]	908	27004	36	30	9	8	42.8	7.79	2.21	Quantitation summary for protein	129/126	0.959	35	1.041	*	130/126	1.19	35	[1.066]		131/126	1.076	35	1.047	*	129/127	1.072	35	1.047	*	130/127	1.357	35	[1.067]		131/127	1.214	35	1.043	*	129/128	0.963	35	[1.047]		130/128	1.211
411	gi|28375613	damaged-DNA binding protein DDB p127 subunit [Gallus gallus]	903	140790	60	43	22	21	18.1	5.15	0.7	Quantitation summary for protein	129/126	0.987	55	[1.028]		130/126	0.941	55	[1.051]		131/126	0.946	55	[1.043]		129/127	0.962	55	[1.026]		130/127	0.936	55	[1.057]		131/127	0.931	55	1.046	*	129/128	0.972	55	1.022	*	130/128	0.94
412	gi|363731688	PREDICTED: monofunctional C1-tetrahydrofolate synthase, mitochondrial [Gallus gallus]	903	114695	56	45	19	15	20.2	8.3	0.66	Quantitation summary for protein	129/126	1.168	50	1.024	*	130/126	1.078	50	[1.034]		131/126	1.041	50	[1.028]		129/127	0.982	50	1.025	*	130/127	0.925	50	1.034	*	131/127	0.884	50	1.034	*	129/128	0.95	49	1.014	*	130/128	0.888
413	gi|53132771	hypothetical protein RCJMB04_13p14 [Gallus gallus]	902	72877	39	33	11	9	22	5.79	0.77	Quantitation summary for protein	129/126	1.004	34	[1.045]		130/126	0.843	33	[1.065]		131/126	0.866	34	[1.048]		129/127	1.17	34	[1.050]		130/127	1.003	33	[1.066]		131/127	1.02	34	[1.038]		129/128	0.982	34	1.027	*	130/128	0.838
414	gi|118097222	PREDICTED: eukaryotic peptide chain release factor subunit 1 [Gallus gallus]	899	57936	43	36	10	9	24	5.51	0.84	Quantitation summary for protein	129/126	1.192	41	[1.029]		130/126	0.95	41	[1.043]		131/126	1.025	41	[1.046]		129/127	1.048	41	1.015	*	130/127	0.853	41	1.043	*	131/127	0.91	41	1.033	*	129/128	1.048	41	1.016	*	130/128	0.848
415	gi|517091	transrationally controlled tumor protein [Gallus gallus]	897	23126	34	28	6	6	38.4	4.9	5.66	Quantitation summary for protein	129/126	0.93	31	1.077	*	130/126	1.591	31	[1.151]		131/126	1.56	31	[1.153]		129/127	0.909	31	1.066	*	130/127	1.588	31	[1.142]		131/127	1.54	31	[1.137]		129/128	1.039	31	1.061	*	130/128	1.804
416	gi|363744151	PREDICTED: NADH dehydrogenase [ubiquinone] iron-sulfur protein 4, mitochondrial [Gallus gallus]	893	22608	31	26	7	7	40.4	9.88	2.02	Quantitation summary for protein	129/126	0.994	29	[1.042]		130/126	0.969	29	[1.052]		131/126	0.982	29	[1.043]		129/127	1.011	29	[1.060]		130/127	1.006	29	1.049		131/127	1.009	29	1.047		129/128	0.853	29	[1.051]		130/128	0.844
417	gi|53136784	hypothetical protein RCJMB04_33n14 [Gallus gallus]	893	56939	38	29	17	12	45.5	8.63	1.46	Quantitation summary for protein	129/126	1.048	32	1.052	*	130/126	0.941	32	1.069	*	131/126	0.937	32	1.051	*	129/127	1.045	32	[1.044]		130/127	0.959	32	1.074	*	131/127	0.944	32	1.05	*	129/128	0.916	32	1.036	*	130/128	0.835
418	gi|363744261	PREDICTED: transcription factor BTF3 [Gallus gallus]	892	21594	40	32	7	6	63.6	6.85	1.74	Quantitation summary for protein	129/126	1.231	10	1.098	*	130/126	0.825	9	1.22	*	131/126	1.104	10	1.12	*	129/127	0.956	10	1.077		130/127	0.682	9	1.169	*	131/127	0.866	10	1.093	*	129/128	0.869	10	1.078	*	130/128	0.641
419	gi|46399073	type II alpha-keratin IIA [Gallus gallus]	890	69698	48	43	8	8	11.5	8.46	0.58	Quantitation summary for protein	129/126	0.24	17	1.16	*	130/126	0.644	17	1.085	*	131/126	0.485	17	1.126	*	129/127	0.446	17	1.142	*	130/127	1.222	17	1.068	*	131/127	0.91	17	1.113	*	129/128	0.732	17	[1.139]		130/128	1.993
420	gi|488468	elongation factor 1 alpha [Gallus gallus]	889	61467	64	45	15	13	32	9.1	2.31	Quantitation summary for protein	129/126	1.255	22	1.09	*	130/126	0.871	21	[1.064]		131/126	1.157	22	[1.083]		129/127	1.081	22	1.101	*	130/127	0.794	21	[1.114]		131/127	1.006	22	[1.104]		129/128	1.111	22	[1.082]		130/128	0.815
421	gi|53130416	hypothetical protein RCJMB04_7j20 [Gallus gallus]	886	50830	34	33	8	8	23.6	8.65	1	Quantitation summary for protein	129/126	1.102	34	[1.042]		130/126	1.093	34	[1.051]		131/126	1.151	34	[1.044]		129/127	1.04	34	1.048	*	130/127	1.052	34	[1.050]		131/127	1.097	34	[1.049]		129/128	0.929	34	1.033	*	130/128	0.934
422	gi|5823898	alpha-actinin associated LIM protein, smooth muscle isoform (smALP) [Gallus gallus]	881	38924	48	37	9	8	35.2	8.72	1.45	Quantitation summary for protein	129/126	1.517	2	1.046	*	130/126	1.373	2	1.032	*	131/126	1.431	2	1.014	*	129/127	2.475	2	1.119		130/127	2.287	2	1.133		131/127	2.358	2	1.154		129/128	1.931	2	1.06	*	130/128	1.773
423	gi|53132662	hypothetical protein RCJMB04_13l16 [Gallus gallus]	881	37541	35	28	9	7	32.7	8.43	2.27	Quantitation summary for protein	129/126	0.962	33	[1.046]		130/126	0.892	33	[1.061]		131/126	0.864	33	[1.041]		129/127	0.913	33	1.045	*	130/127	0.86	32	1.045	*	131/127	0.825	32	1.042	*	129/128	0.888	33	[1.031]		130/128	0.836
424	gi|50800573	PREDICTED: 60S acidic ribosomal protein P2 [Gallus gallus]	878	14356	40	36	8	7	92.2	4.42	11.95	Quantitation summary for protein	129/126	1.356	37	1.063	*	130/126	1.561	37	[1.107]		131/126	1.53	37	[1.086]		129/127	0.952	36	1.064	*	130/127	1.122	36	[1.107]		131/127	1.085	36	[1.078]		129/128	1.039	37	1.038	*	130/128	1.213
425	gi|5805326	ubiquitin carboxyl-terminal hydrolase-6 [Gallus gallus]	877	29907	31	26	7	6	38.7	4.91	1.59	Quantitation summary for protein	129/126	0.904	29	1.04	*	130/126	0.967	29	[1.047]		131/126	0.923	29	1.045	*	129/127	1.038	29	1.027	*	130/127	1.132	29	1.052	*	131/127	1.07	29	1.047	*	129/128	1.079	29	1.027	*	130/128	1.169
426	gi|60098555	hypothetical protein RCJMB04_3l20 [Gallus gallus]	876	50541	45	36	19	14	36.1	8.19	2.77	Quantitation summary for protein	129/126	0.963	43	1.077	*	130/126	1.129	43	[1.175]		131/126	1.104	43	[1.133]		129/127	0.987	43	[1.072]		130/127	1.18	43	[1.183]		131/127	1.142	43	[1.150]		129/128	0.909	43	1.052	*	130/128	1.081
427	gi|115597	RecName: Full=F-actin-capping protein subunit beta isoforms 1 and 2; AltName: Full=Beta-actinin subunit II; AltName: Full=CapZ 36/32; AltName: Full=CapZ B1 and B2	876	36385	44	33	11	7	37.5	5.36	2.1	Quantitation summary for protein	129/126	1.363	17	1.05	*	130/126	1.416	17	1.03	*	131/126	1.633	16	1.035	*	129/127	1.886	17	1.069	*	130/127	1.999	17	[1.122]		131/127	2.361	17	1.099	*	129/128	1.633	17	1.065	*	130/128	1.72
428	gi|53135033	hypothetical protein RCJMB04_24e8 [Gallus gallus]	874	48050	44	36	13	12	35.7	6.15	1.89	Quantitation summary for protein	129/126	0.909	38	[1.052]		130/126	1.062	38	[1.062]		131/126	0.986	38	1.055		129/127	0.937	38	1.041	*	130/127	1.117	38	[1.077]		131/127	1.026	38	[1.071]		129/128	0.93	38	[1.034]		130/128	1.102
429	gi|118097622	PREDICTED: leucyl-tRNA synthetase, cytoplasmic [Gallus gallus]	873	159735	46	39	15	13	13.7	6.51	0.41	Quantitation summary for protein	129/126	1.014	45	[1.033]		130/126	0.989	45	1.042		131/126	0.95	45	1.031	*	129/127	0.94	45	1.032	*	130/127	0.936	45	1.052	*	131/127	0.889	45	1.036	*	129/128	0.993	44	1.018	*	130/128	0.98
430	gi|363743812	PREDICTED: guanidinoacetate N-methyltransferase [Gallus gallus]	871	26019	33	30	6	5	32.9	5.56	1.07	Quantitation summary for protein	129/126	0.812	30	1.059	*	130/126	0.914	30	[1.120]		131/126	0.901	30	1.086	*	129/127	0.892	30	1.057	*	130/127	1.024	30	[1.151]		131/127	1	30	[1.112]		129/128	0.868	30	1.062	*	130/128	0.991
431	gi|319918842	serum paraoxonase/arylesterase 2 precursor [Gallus gallus]	870	44293	34	30	11	11	44.4	5.17	1.94	Quantitation summary for protein	129/126	1.19	2	1.019	*	130/126	0.931	2	1.087		131/126	1.099	2	1.023		129/127	1.095	2	1.037		130/127	0.875	2	1.106		131/127	1.022	2	1.041		129/128	1.067	2	1.032		130/128	0.847
432	gi|383387799	methionine--tRNA ligase, cytoplasmic [Gallus gallus]	869	107329	37	32	11	9	14.9	6.34	0.43	Quantitation summary for protein	129/126	0.86	34	[1.072]		130/126	0.881	34	[1.078]		131/126	0.883	34	[1.065]		129/127	0.879	34	1.034	*	130/127	0.919	34	1.064	*	131/127	0.911	34	1.057	*	129/128	1.135	34	1.023	*	130/128	1.18
433	gi|363729502	PREDICTED: S-formylglutathione hydrolase isoform 1 [Gallus gallus]	866	37037	24	22	5	5	28	6.3	0.98	Quantitation summary for protein	129/126	0.811	24	1.043	*	130/126	0.89	24	1.066	*	131/126	0.918	24	[1.049]		129/127	1.142	24	[1.054]		130/127	1.28	24	1.092	*	131/127	1.306	24	[1.068]		129/128	1.032	24	[1.031]		130/128	1.149
434	gi|259835	prepro-cathepsin D [Gallus gallus]	865	49685	31	26	6	6	17.1	5.9	0.78	Quantitation summary for protein	129/126	1.289	31	[1.043]		130/126	0.997	31	[1.045]		131/126	1.174	31	1.041	*	129/127	1.334	31	1.046	*	130/127	1.053	31	1.039	*	131/127	1.227	31	1.039	*	129/128	1.112	31	1.032	*	130/128	0.873
435	gi|53130690	hypothetical protein RCJMB04_9i5 [Gallus gallus]	862	23380	34	31	7	7	36.7	5.53	2.8	Quantitation summary for protein	129/126	1.044	17	[1.051]		130/126	0.739	17	1.042	*	131/126	0.818	17	[1.044]		129/127	1.074	17	[1.048]		130/127	0.776	17	1.042	*	131/127	0.849	17	[1.039]		129/128	1.466	17	1.029	*	130/128	1.053
436	gi|208610021	eukaryotic peptide chain release factor GTP-binding subunit ERF3A [Gallus gallus]	860	79071	46	33	13	10	23.5	5.07	0.7	Quantitation summary for protein	129/126	1.063	42	[1.047]		130/126	0.928	42	1.052	*	131/126	0.922	42	1.048	*	129/127	1.085	42	[1.054]		130/127	0.967	42	1.05	*	131/127	0.95	42	1.049	*	129/128	1.038	42	1.021	*	130/128	0.919
437	gi|50748430	PREDICTED: proteasome subunit alpha type-6 [Gallus gallus]	858	32206	33	29	8	7	30.9	6.13	1.42	Quantitation summary for protein	129/126	1.084	31	[1.040]		130/126	0.893	31	[1.101]		131/126	1.019	31	[1.065]		129/127	1.026	31	[1.030]		130/127	0.863	31	[1.113]		131/127	0.974	31	[1.076]		129/128	0.904	31	1.024	*	130/128	0.755
438	gi|363743604	PREDICTED: heat shock protein 30C-like [Gallus gallus]	857	24164	30	23	6	5	41.5	5.24	0.91	Quantitation summary for protein	129/126	1.239	19	1.064	*	130/126	1.058	19	1.1	*	131/126	0.783	19	1.068	*	129/127	1.344	19	1.072	*	130/127	1.172	19	[1.072]		131/127	0.858	19	1.04	*	129/128	1.392	19	1.096	*	130/128	1.206
439	gi|363732293	PREDICTED: triadin [Gallus gallus]	854	67618	37	30	7	6	14.3	9.46	0.39	Quantitation summary for protein	129/126	1.511	36	[1.090]		130/126	1.643	36	1.071	*	131/126	1.282	36	[1.083]		129/127	1.108	36	[1.044]		130/127	1.23	36	1.078	*	131/127	0.95	36	1.049	*	129/128	0.756	36	[1.036]		130/128	0.834
440	gi|50749993	PREDICTED: glutaredoxin-3 [Gallus gallus]	853	43482	30	28	8	8	26.8	5.47	1.41	Quantitation summary for protein	129/126	1.025	28	[1.043]		130/126	0.99	28	[1.074]		131/126	0.988	28	[1.053]		129/127	0.971	28	[1.048]		130/127	0.958	28	[1.079]		131/127	0.91	27	1.05	*	129/128	0.95	28	1.028	*	130/128	0.931
441	gi|118101401	PREDICTED: voltage-dependent anion-selective channel protein 3 [Gallus gallus]	852	36742	41	36	9	8	33.5	8.85	1.58	Quantitation summary for protein	129/126	0.809	38	1.044	*	130/126	0.973	38	1.055	*	131/126	0.969	38	1.039	*	129/127	0.842	38	[1.041]		130/127	1.034	38	[1.060]		131/127	1.02	38	1.043	*	129/128	0.791	38	[1.038]		130/128	0.965
442	gi|118101780	PREDICTED: adenylate kinase 2, mitochondrial [Gallus gallus]	850	29748	34	30	8	8	32.5	8.39	1.6	Quantitation summary for protein	129/126	0.94	32	[1.034]		130/126	0.844	32	[1.041]		131/126	0.951	32	[1.045]		129/127	0.966	32	[1.027]		130/127	0.886	32	[1.037]		131/127	0.987	32	1.034	*	129/128	0.846	32	1.019	*	130/128	0.771
443	gi|2905649	cytoplasmic linker protein CLIP-170 [Gallus gallus]	846	151301	58	43	27	21	21.9	5.48	0.63	Quantitation summary for protein	129/126	0.889	3	1.033	*	130/126	0.923	4	1.034	*	131/126	1.024	4	1.037		129/127	1.074	4	1.055		130/127	1.063	4	1.02	*	131/127	1.166	4	1.051	*	129/128	0.94	4	1.072		130/128	0.924
444	gi|53129708	hypothetical protein RCJMB04_6a12 [Gallus gallus]	845	18685	55	42	5	5	27.1	5.32	4.27	Quantitation summary for protein	129/126	---	0	---		130/126	---	0	---		131/126	---	0	---		129/127	---	0	---		130/127	---	0	---		131/127	---	0	---		129/128	---	0	---		130/128	---
445	gi|212294	MHC B complex protein 12.3 [Gallus gallus]	843	39636	55	42	15	14	47	7.6	4.39	Quantitation summary for protein	129/126	1.211	50	[1.077]		130/126	1.183	50	[1.147]		131/126	1.194	50	[1.116]		129/127	0.99	50	[1.075]		130/127	0.987	50	[1.157]		131/127	0.985	50	1.119		129/128	1.112	50	[1.044]		130/128	1.102
446	gi|121944	RecName: Full=Histone H1	840	36535	33	31	7	6	29.4	11.12	1	Quantitation summary for protein	129/126	---	1	---		130/126	---	1	---		131/126	---	1	---		129/127	---	1	---		130/127	---	1	---		131/127	---	1	---		129/128	---	1	---		130/128	---
447	gi|60098541	hypothetical protein RCJMB04_3k9 [Gallus gallus]	840	25075	37	32	5	4	23.4	9.49	2.08	Quantitation summary for protein	129/126	0.928	33	1.061	*	130/126	1.015	33	1.063		131/126	0.927	33	1.057	*	129/127	0.97	33	[1.058]		130/127	1.083	33	1.08	*	131/127	0.979	33	1.071		129/128	1.179	33	1.078	*	130/128	1.308
448	gi|118102574	PREDICTED: prolargin [Gallus gallus]	838	48788	47	46	10	9	29.9	9.11	1.05	Quantitation summary for protein	129/126	0.875	47	1.027	*	130/126	1.114	47	[1.068]		131/126	1.197	47	[1.047]		129/127	2.056	47	[1.095]		130/127	2.672	47	[1.159]		131/127	2.84	47	[1.140]		129/128	1.184	47	[1.073]		130/128	1.529
449	gi|53135051	hypothetical protein RCJMB04_24e23 [Gallus gallus]	832	52861	34	32	10	9	25.8	6.09	0.95	Quantitation summary for protein	129/126	1.345	32	[1.064]		130/126	1.26	32	1.041	*	131/126	1.611	32	1.053	*	129/127	0.979	32	[1.034]		130/127	0.935	32	[1.058]		131/127	1.183	32	[1.046]		129/128	1.029	32	1.037	*	130/128	0.977
450	gi|118534	RecName: Full=Glutamate dehydrogenase 1, mitochondrial; Short=GDH 1	831	64325	42	36	14	11	31	8.48	1.11	Quantitation summary for protein	129/126	0.999	21	[1.061]		130/126	0.964	21	1.054	*	131/126	0.984	21	[1.040]		129/127	0.927	21	[1.053]		130/127	0.913	21	1.07	*	131/127	0.922	21	1.049	*	129/128	0.909	21	1.038	*	130/128	0.89
451	gi|53126533	hypothetical protein RCJMB04_1e12 [Gallus gallus]	831	120754	38	33	13	11	14.1	4.96	0.38	Quantitation summary for protein	129/126	1.06	35	1.018	*	130/126	0.972	35	[1.045]		131/126	0.911	35	[1.023]		129/127	0.903	35	[1.033]		130/127	0.845	35	[1.060]		131/127	0.784	35	[1.041]		129/128	1.138	35	[1.021]		130/128	1.039
452	gi|118088	RecName: Full=Peptidyl-prolyl cis-trans isomerase B; Short=PPIase B; AltName: Full=Cyclophilin B; AltName: Full=Rotamase B; AltName: Full=S-cyclophilin; Short=SCYLP; Flags: Precursor	828	28185	44	36	8	8	35.3	9.4	2.42	Quantitation summary for protein	129/126	1.331	35	[1.031]		130/126	0.881	35	[1.054]		131/126	1.205	35	1.038	*	129/127	1.417	35	[1.036]		130/127	0.957	35	[1.076]		131/127	1.295	35	[1.054]		129/128	0.986	35	[1.020]		130/128	0.662
453	gi|363746086	PREDICTED: apolipoprotein A-I-binding protein, partial [Gallus gallus]	828	14772	35	30	4	4	44	7.03	3.27	Quantitation summary for protein	129/126	0.974	33	[1.061]		130/126	0.947	33	[1.075]		131/126	0.952	33	1.057	*	129/127	1.105	34	[1.060]		130/127	1.096	33	1.072	*	131/127	1.093	34	1.059	*	129/128	0.949	34	1.059	*	130/128	0.935
454	gi|363728836	PREDICTED: ribosomal protein S6 kinase alpha-3 [Gallus gallus]	825	92778	35	28	12	10	19.1	6.79	0.46	Quantitation summary for protein	129/126	1.011	30	[1.079]		130/126	0.817	30	[1.068]		131/126	0.815	30	[1.056]		129/127	1.094	30	[1.080]		130/127	0.903	30	[1.068]		131/127	0.891	30	[1.055]		129/128	0.982	30	1.033	*	130/128	0.805
455	gi|53130348	hypothetical protein RCJMB04_7d1 [Gallus gallus]	825	33430	78	68	10	7	40.4	4.79	1.83	Quantitation summary for protein	129/126	1.045	71	[1.023]		130/126	0.828	69	1.036	*	131/126	0.836	71	[1.033]		129/127	0.996	71	[1.027]		130/127	0.806	69	1.033	*	131/127	0.805	71	[1.029]		129/128	0.919	71	1.012	*	130/128	0.74
456	gi|121896	RecName: Full=Histone H1.03	821	37179	33	30	7	5	26.8	10.96	0.82	Quantitation summary for protein	129/126	---	0	---		130/126	---	0	---		131/126	---	0	---		129/127	---	0	---		130/127	---	0	---		131/127	---	0	---		129/128	---	0	---		130/128	---
457	gi|53127478	hypothetical protein RCJMB04_2i24 [Gallus gallus]	816	63261	37	28	12	9	23	5.84	0.66	Quantitation summary for protein	129/126	0.988	35	1.019	*	130/126	0.808	35	[1.041]		131/126	0.831	35	[1.028]		129/127	1.055	35	1.02	*	130/127	0.88	35	1.048	*	131/127	0.897	35	1.032	*	129/128	0.988	35	1.022	*	130/128	0.819
458	gi|363742805	PREDICTED: uncharacterized protein LOC100857958 [Gallus gallus]	814	79826	24	21	8	6	18.4	5.32	0.5	Quantitation summary for protein	129/126	0.817	20	1.09	*	130/126	0.846	19	1.098	*	131/126	0.892	20	1.043	*	129/127	0.705	20	1.119	*	130/127	0.745	19	[1.121]		131/127	0.779	21	[1.087]		129/128	0.799	20	1.106	*	130/128	0.84
459	gi|485265	proteasome 28 kDa subunit homolog, similar to Swiss-Prot Accession Number P22769 [Gallus gallus]	812	33955	25	22	5	4	17.3	8.93	0.92	Quantitation summary for protein	129/126	1.028	25	1.035	*	130/126	0.867	25	[1.045]		131/126	1.048	25	1.046	*	129/127	1.029	25	[1.032]		130/127	0.886	25	1.052	*	131/127	1.06	25	[1.055]		129/128	0.943	25	1.032	*	130/128	0.807
460	gi|63511	heat shock protein 47 [Gallus gallus]	812	54877	37	33	9	8	21.7	8.74	0.59	Quantitation summary for protein	129/126	1.179	33	1.019	*	130/126	0.962	34	[1.035]		131/126	1.275	34	[1.027]		129/127	0.906	34	1.02	*	130/127	0.777	34	[1.044]		131/127	1.019	34	1.022	*	129/128	0.951	34	1.017	*	130/128	0.81
461	gi|1212910	ryanodine receptor type 1 [Gallus gallus]	811	76450	52	40	10	7	17.7	4.59	0.66	Quantitation summary for protein	129/126	1.051	23	1.066	*	130/126	0.796	23	1.146	*	131/126	0.705	23	1.118	*	129/127	0.847	23	1.047	*	130/127	0.655	23	[1.173]		131/127	0.573	23	1.14	*	129/128	1.011	23	1.055		130/128	0.777
462	gi|6065857	dynactin [Gallus gallus]	809	159940	37	26	12	9	10.5	6.15	0.22	Quantitation summary for protein	129/126	1.047	28	1.03	*	130/126	0.943	29	1.061	*	131/126	0.891	29	1.05	*	129/127	0.897	29	[1.052]		130/127	0.825	29	[1.058]		131/127	0.778	19	1.026	*	129/128	1.012	29	1.035		130/128	0.924
463	gi|363734227	PREDICTED: alpha-1-antiproteinase 2 [Gallus gallus]	807	56875	48	39	10	8	19.3	6.08	0.86	Quantitation summary for protein	129/126	1.56	45	1.029	*	130/126	0.987	45	[1.056]		131/126	1.439	45	1.052	*	129/127	1.588	45	[1.028]		130/127	1.025	45	[1.065]		131/127	1.48	45	[1.059]		129/128	1.384	45	1.028	*	130/128	0.888
464	gi|12381875	ribosomal protein L22 [Gallus gallus]	806	19360	21	20	3	2	23.4	9.21	0.62	Quantitation summary for protein	129/126	1.871	19	1.069	*	130/126	1.235	20	[1.082]		131/126	1.361	20	[1.075]		129/127	2.483	20	1.086	*	130/127	1.694	20	[1.089]		131/127	1.848	20	1.084	*	129/128	0.986	20	1.036		130/128	0.668
465	gi|211813	SM22 [Gallus gallus]	805	26711	40	38	7	5	34.5	8.85	1.56	Quantitation summary for protein	129/126	1.047	34	1.022	*	130/126	1.296	34	1.017	*	131/126	0.868	32	1.022	*	129/127	1.099	34	[1.015]		130/127	1.39	34	1.011	*	131/127	0.925	34	1.022	*	129/128	1.193	34	1.017	*	130/128	1.499
466	gi|1149509	37kD Laminin receptor precursor /p40 ribosomal associated protein [Gallus gallus]	802	35865	46	36	13	12	38.9	4.8	3.5	Quantitation summary for protein	129/126	1.261	38	1.084	*	130/126	1.116	38	1.084	*	131/126	1.231	38	1.079	*	129/127	0.9	39	[1.106]		130/127	0.81	39	1.119	*	131/127	0.887	39	[1.119]		129/128	0.916	39	[1.085]		130/128	0.82
467	gi|118092411	PREDICTED: glutamate dehydrogenase 1, mitochondrial [Gallus gallus]	801	55068	36	32	12	10	32.5	8.34	1.13	Quantitation summary for protein	129/126	0.9	15	1.065	*	130/126	0.851	14	1.037	*	131/126	0.869	15	1.033	*	129/127	0.944	15	[1.057]		130/127	0.897	15	1.047	*	131/127	0.921	15	1.037	*	129/128	0.8	15	[1.030]		130/128	0.755
468	gi|363746632	PREDICTED: [Protein ADP-ribosylarginine] hydrolase [Gallus gallus]	796	43186	54	47	10	10	26.2	5.88	1.25	Quantitation summary for protein	129/126	0.807	49	1.042	*	130/126	0.952	49	[1.136]		131/126	0.876	49	[1.045]		129/127	0.95	49	[1.043]		130/127	1.144	49	[1.128]		131/127	1.042	49	1.05	*	129/128	0.95	49	1.032	*	130/128	1.137
469	gi|359740	acylphosphatase isozyme Ch1	792	13849	37	31	7	6	57.8	9.52	6.23	Quantitation summary for protein	129/126	1.065	33	1.083	*	130/126	0.915	33	[1.119]		131/126	0.811	33	1.119	*	129/127	1.326	33	1.062	*	130/127	1.162	33	[1.124]		131/127	1.02	33	[1.091]		129/128	0.914	33	1.043	*	130/128	0.796
470	gi|118093509	PREDICTED: isocitrate dehydrogenase [NADP] cytoplasmic [Gallus gallus]	787	55451	57	52	17	14	35.9	8.02	1.51	Quantitation summary for protein	129/126	1.099	50	1.038	*	130/126	0.802	50	1.062	*	131/126	0.919	50	1.04	*	129/127	1.185	50	[1.043]		130/127	0.878	49	1.068	*	131/127	1	50	[1.054]		129/128	1.055	50	[1.042]		130/128	0.78
471	gi|50729879	PREDICTED: ATP synthase-coupling factor 6, mitochondrial isoform 2 [Gallus gallus]	787	14873	30	24	5	5	43.9	8.96	3.23	Quantitation summary for protein	129/126	0.795	25	[1.074]		130/126	1.044	25	1.034	*	131/126	1.014	24	1.059		129/127	0.81	25	1.037	*	130/127	1.085	25	[1.068]		131/127	1.04	25	1.039	*	129/128	0.73	25	1.046	*	130/128	0.971
472	gi|303227902	acetyl-CoA acetyltransferase, cytosolic [Gallus gallus]	786	45613	27	23	6	5	23.1	7.63	0.75	Quantitation summary for protein	129/126	0.947	24	1.07	*	130/126	0.88	23	[1.072]		131/126	0.892	23	1.084	*	129/127	0.878	23	[1.071]		130/127	0.833	23	1.1	*	131/127	0.835	23	1.091	*	129/128	0.861	25	[1.066]		130/128	0.813
473	gi|118091993	PREDICTED: echinoderm microtubule associated protein like 1 isoform 2 [Gallus gallus]	784	102120	43	37	14	11	15.5	6.74	0.56	Quantitation summary for protein	129/126	1.047	42	[1.023]		130/126	0.87	42	[1.043]		131/126	0.788	42	[1.042]		129/127	1.108	42	[1.035]		130/127	0.94	42	[1.034]		131/127	0.842	42	1.036	*	129/128	0.789	42	1.02	*	130/128	0.665
474	gi|2338714	restin [Gallus gallus]	782	198050	60	42	30	22	17.7	5.27	0.5	Quantitation summary for protein	129/126	0.818	5	1.079	*	130/126	1.048	5	[1.148]		131/126	0.869	5	1.071	*	129/127	0.839	5	1.137	*	130/127	1.097	5	1.113		131/127	0.892	4	1.054	*	129/128	1.008	5	1.081		130/128	1.31
475	gi|53133416	hypothetical protein RCJMB04_16g4 [Gallus gallus]	782	64484	52	36	19	17	42.9	6.07	1.7	Quantitation summary for protein	129/126	1.028	43	1.042	*	130/126	0.915	43	1.039	*	131/126	0.89	43	[1.031]		129/127	0.978	43	1.047	*	130/127	0.889	43	1.034	*	131/127	0.856	43	1.042	*	129/128	0.961	43	[1.033]		130/128	0.868
476	gi|4100172	progesterone receptor binding protein [Gallus gallus]	782	10625	21	17	4	3	46.5	7.93	2.08	Quantitation summary for protein	129/126	0.94	18	[1.100]		130/126	1.054	18	1.031	*	131/126	1.076	18	1.052	*	129/127	0.876	17	1.047	*	130/127	1.022	18	[1.086]		131/127	1.033	18	[1.073]		129/128	0.82	18	1.06	*	130/128	0.933
477	gi|53128375	hypothetical protein RCJMB04_4m4 [Gallus gallus]	781	62708	42	36	13	11	23.4	6.3	0.94	Quantitation summary for protein	129/126	0.914	38	[1.030]		130/126	0.933	38	[1.062]		131/126	0.829	38	[1.054]		129/127	0.951	38	[1.033]		130/127	0.991	38	[1.067]		131/127	0.871	38	[1.062]		129/128	1.061	38	1.029	*	130/128	1.099
478	gi|2661436	receptor-associated protein [Gallus gallus]	780	51334	24	22	8	6	20.1	8.61	0.55	Quantitation summary for protein	129/126	0.91	23	[1.076]		130/126	1.16	23	[1.125]		131/126	1.069	23	[1.077]		129/127	1.036	23	[1.088]		130/127	1.348	23	[1.118]		131/127	1.229	23	[1.069]		129/128	0.844	23	1.032	*	130/128	1.092
479	gi|211194	5-aminoimidazole ribonucleotide (AIR) carboxylase-5- aminoimidazole-4-N-succinocarboxamide ribonucleotide (SAICAR) synthetase [Gallus gallus]	780	56087	38	30	10	9	26.5	8.18	1.1	Quantitation summary for protein	129/126	0.667	38	[1.075]		130/126	0.702	38	[1.081]		131/126	0.7	38	[1.080]		129/127	0.804	38	1.028	*	130/127	0.864	38	1.042	*	131/127	0.852	38	1.04	*	129/128	0.915	38	1.027	*	130/128	0.974
480	gi|459352614	TPA_inf: aldehyde oxidase 1 [Gallus gallus]	778	168453	40	32	18	12	14.4	6.27	0.36	Quantitation summary for protein	129/126	0.875	36	1.032	*	130/126	0.641	36	1.065	*	131/126	0.816	36	1.061	*	129/127	1.17	36	1.047	*	130/127	0.875	36	1.052	*	131/127	1.102	36	1.049	*	129/128	1.028	36	1.025	*	130/128	0.764
481	gi|50728374	PREDICTED: 40S ribosomal protein S16 [Gallus gallus]	774	20413	37	31	9	7	54.1	10.21	3.59	Quantitation summary for protein	129/126	1.279	34	[1.057]		130/126	1.225	34	1.064	*	131/126	1.222	34	1.055	*	129/127	0.966	34	[1.038]		130/127	0.945	34	1.067	*	131/127	0.933	34	1.042	*	129/128	1.032	34	1.021	*	130/128	1.003
482	gi|53130274	hypothetical protein RCJMB04_6l6 [Gallus gallus]	774	34796	40	30	13	12	50.4	5.04	3.3	Quantitation summary for protein	129/126	1.013	27	1.054		130/126	0.829	27	1.083	*	131/126	0.916	25	1.044	*	129/127	1.011	26	1.044		130/127	0.852	27	1.074	*	131/127	0.927	27	1.049	*	129/128	0.957	26	1.029	*	130/128	0.795
483	gi|53127352	hypothetical protein RCJMB04_1p8 [Gallus gallus]	772	98977	24	20	8	7	12.8	5.32	0.3	Quantitation summary for protein	129/126	0.971	21	[1.035]		130/126	0.975	21	1.067		131/126	0.861	21	1.051	*	129/127	0.755	21	[1.041]		130/127	0.774	21	1.099	*	131/127	0.676	21	1.088	*	129/128	0.85	21	1.021	*	130/128	0.866
484	gi|53134140	hypothetical protein RCJMB04_22k18 [Gallus gallus]	771	58416	39	37	10	9	28.3	4.9	1.04	Quantitation summary for protein	129/126	0.942	38	1.044	*	130/126	0.838	38	[1.071]		131/126	0.775	38	1.082	*	129/127	1.022	37	1.031	*	130/127	0.925	38	1.06	*	131/127	0.846	38	1.065	*	129/128	1.206	38	1.058	*	130/128	1.088
485	gi|363743522	PREDICTED: vacuolar protein-sorting-associated protein 25 [Gallus gallus]	769	22740	28	25	7	6	34.5	7.85	1.28	Quantitation summary for protein	129/126	1.014	27	1.025	*	130/126	0.895	27	1.031	*	131/126	0.937	27	1.026	*	129/127	1.049	27	1.016	*	130/127	0.956	26	1.023	*	131/127	0.979	27	1.025	*	129/128	0.955	27	1.02	*	130/128	0.855
486	gi|60098911	hypothetical protein RCJMB04_15d24 [Gallus gallus]	768	112852	46	40	20	18	24.8	5.28	0.72	Quantitation summary for protein	129/126	0.907	33	1.033	*	130/126	0.897	33	[1.043]		131/126	1.017	33	1.038	*	129/127	0.891	33	1.028	*	130/127	0.899	33	[1.057]		131/127	1.008	33	1.049		129/128	1.047	33	1.031	*	130/128	1.05
487	gi|12034955	manganese-containing superoxide dismutase precursor [Gallus gallus]	767	28596	26	23	4	3	14.3	8.6	1.16	Quantitation summary for protein	129/126	0.903	25	1.037	*	130/126	1.346	25	[1.083]		131/126	1.085	25	[1.046]		129/127	0.949	25	1.027	*	130/127	1.443	25	[1.095]		131/127	1.151	25	[1.054]		129/128	0.873	25	1.03	*	130/128	1.32
488	gi|882147	CRMP-62 [Gallus gallus]	766	70253	38	32	12	10	25.3	5.96	0.81	Quantitation summary for protein	129/126	0.947	30	1.051	*	130/126	0.828	30	1.053	*	131/126	0.886	29	1.035	*	129/127	0.968	30	1.036	*	130/127	0.859	29	1.055	*	131/127	0.914	29	1.044	*	129/128	1.018	30	1.033	*	130/128	0.903
489	gi|363734959	PREDICTED: protein AHNAK2-like [Gallus gallus]	765	193442	30	26	9	8	7	6.3	0.2	Quantitation summary for protein	129/126	0.998	20	1.032		130/126	0.832	20	1.053	*	131/126	1.02	20	1.044		129/127	1.01	20	1.036		130/127	0.86	20	1.059	*	131/127	1.043	20	[1.053]		129/128	1.086	20	[1.034]		130/128	0.918
490	gi|131122	RecName: Full=Parvalbumin, thymic; AltName: Full=Avian thymic hormone; Short=ATH; AltName: Full=Thymus-specific antigen T1	764	14297	22	18	6	5	59.6	4.53	3.45	Quantitation summary for protein	129/126	2.306	21	1.107	*	130/126	1.485	21	1.08	*	131/126	1.917	20	1.072	*	129/127	1.423	21	[1.076]		130/127	0.935	21	1.049	*	131/127	1.191	21	1.049	*	129/128	1.732	21	[1.065]		130/128	1.132
491	gi|53127410	hypothetical protein RCJMB04_2d15 [Gallus gallus]	759	81527	49	30	15	12	22.9	4.42	0.88	Quantitation summary for protein	129/126	1.019	45	1.028	*	130/126	0.914	45	[1.052]		131/126	1.017	45	[1.035]		129/127	0.987	45	[1.037]		130/127	0.903	45	1.06	*	131/127	0.995	45	[1.034]		129/128	1.148	45	[1.034]		130/128	1.044
492	gi|2827444	nucleoside diphosphate kinase [Gallus gallus]	758	20198	68	42	10	9	70.6	7.72	9.07	Quantitation summary for protein	129/126	1.006	48	[1.136]		130/126	0.781	48	1.09	*	131/126	0.859	48	1.089	*	129/127	1.018	48	[1.149]		130/127	0.806	48	1.1	*	131/127	0.877	48	1.089	*	129/128	1.001	48	1.056		130/128	0.788
493	gi|12964	unnamed protein product [Gallus gallus]	758	27098	31	27	5	4	28.2	4.57	1.84	Quantitation summary for protein	129/126	0.93	30	[1.118]		130/126	1.138	30	[1.119]		131/126	1.012	30	[1.117]		129/127	0.937	30	[1.076]		130/127	1.17	30	[1.087]		131/127	1.03	29	1.06	*	129/128	1.12	28	1.067	*	130/128	1.389
494	gi|53136315	hypothetical protein RCJMB04_27j21 [Gallus gallus]	757	60504	31	28	9	8	21.2	5.23	0.89	Quantitation summary for protein	129/126	1.058	28	1.022	*	130/126	0.93	29	1.045	*	131/126	0.936	29	1.047	*	129/127	1.61	29	[1.038]		130/127	1.446	29	[1.042]		131/127	1.44	29	[1.050]		129/128	0.996	29	[1.025]		130/128	0.889
495	gi|363738753	PREDICTED: protein SEC13 homolog [Gallus gallus]	756	39796	38	35	6	5	15.9	5.07	0.61	Quantitation summary for protein	129/126	1.085	37	1.026	*	130/126	0.825	37	1.053	*	131/126	0.871	37	[1.035]		129/127	1.009	37	1.021	*	130/127	0.783	37	[1.062]		131/127	0.818	37	[1.040]		129/128	0.95	37	1.016	*	130/128	0.733
496	gi|63556	unnamed protein product [Gallus gallus]	756	82286	42	32	18	16	28	6.5	0.87	Quantitation summary for protein	129/126	1.825	38	1.062	*	130/126	1.62	38	1.065	*	131/126	1.69	38	1.055	*	129/127	1.067	38	1.021	*	130/127	0.967	38	1.058	*	131/127	0.998	38	1.047		129/128	1.055	38	1.023	*	130/128	0.95
497	gi|1127800	CDC42 [Gallus gallus]	754	25726	30	26	5	4	29.8	6.15	1.35	Quantitation summary for protein	129/126	0.858	24	[1.166]		130/126	0.926	23	1.215		131/126	0.851	24	[1.170]		129/127	0.994	24	[1.121]		130/127	1.093	23	[1.160]		131/127	0.995	24	1.176		129/128	1.498	24	1.112	*	130/128	1.64
498	gi|363740811	PREDICTED: 26S proteasome non-ATPase regulatory subunit 12-like isoform 1 [Gallus gallus]	750	63056	44	37	18	16	34	6.28	1.76	Quantitation summary for protein	129/126	1.099	39	1.028	*	130/126	0.971	39	[1.054]		131/126	0.927	39	[1.042]		129/127	1.096	39	[1.031]		130/127	0.988	39	[1.044]		131/127	0.934	39	1.031	*	129/128	1.229	39	[1.030]		130/128	1.101
499	gi|363729859	PREDICTED: uncharacterized protein LOC396097 [Gallus gallus]	748	136863	36	30	15	12	15.2	5.74	0.33	Quantitation summary for protein	129/126	1.146	30	1.045	*	130/126	1.073	30	[1.102]		131/126	0.937	30	[1.066]		129/127	0.985	30	[1.054]		130/127	0.942	30	[1.092]		131/127	0.813	30	[1.060]		129/128	1.027	30	1.02	*	130/128	0.976
500	gi|57240090	vimentin, partial [Gallus gallus]	748	33530	31	29	9	9	37.6	4.75	1.82	Quantitation summary for protein	129/126	1.995	5	1.139	*	130/126	1.924	5	[1.157]		131/126	1.804	5	1.141	*	129/127	1.436	5	1.065	*	130/127	1.414	5	1.225	*	131/127	1.312	5	1.022	*	129/128	1.029	5	1.072		130/128	1.007
501	gi|363740834	PREDICTED: dual specificity mitogen-activated protein kinase kinase 6-like [Gallus gallus]	747	44617	44	40	11	11	33.8	6.21	2.13	Quantitation summary for protein	129/126	0.751	35	[1.069]		130/126	0.866	35	[1.076]		131/126	0.867	35	[1.071]		129/127	0.841	35	[1.088]		130/127	0.99	35	[1.060]		131/127	0.981	35	[1.057]		129/128	0.984	35	[1.049]		130/128	1.151
502	gi|363735083	PREDICTED: enoyl-CoA hydratase, mitochondrial [Gallus gallus]	746	36078	33	26	13	10	50.5	8.96	2.74	Quantitation summary for protein	129/126	0.93	30	1.07	*	130/126	0.935	31	[1.098]		131/126	1.051	31	[1.074]		129/127	1.095	31	[1.079]		130/127	1.081	29	1.069	*	131/127	1.209	30	1.065	*	129/128	0.947	28	1.044	*	130/128	0.932
503	gi|363738588	PREDICTED: aminoacylase-1-like isoform 1 [Gallus gallus]	745	51550	49	41	13	11	34.1	5.98	1.24	Quantitation summary for protein	129/126	0.894	41	1.048	*	130/126	0.922	43	[1.085]		131/126	0.883	43	[1.077]		129/127	0.983	42	[1.050]		130/127	1.066	43	[1.085]		131/127	1.01	43	[1.077]		129/128	0.972	42	[1.032]		130/128	1.047
504	gi|363743992	PREDICTED: haloacid dehalogenase-like hydrolase domain containing 2 [Gallus gallus]	743	53666	35	27	10	8	27.1	9.27	0.71	Quantitation summary for protein	129/126	1.132	29	1.025	*	130/126	1.082	29	1.112	*	131/126	1.088	29	[1.087]		129/127	1.106	29	[1.032]		130/127	1.079	29	[1.112]		131/127	1.073	29	[1.091]		129/128	1.121	29	[1.041]		130/128	1.087
505	gi|53128484	hypothetical protein RCJMB04_4o16 [Gallus gallus]	742	58243	43	41	13	12	24.2	5.75	1.04	Quantitation summary for protein	129/126	1.005	32	[1.031]		130/126	0.837	32	1.04	*	131/126	0.753	32	1.032	*	129/127	0.894	32	[1.033]		130/127	0.76	32	[1.049]		131/127	0.676	32	1.038	*	129/128	0.914	32	[1.029]		130/128	0.773
506	gi|33302289	RecName: Full=Fatty acid-binding protein, smooth muscle; AltName: Full=SM-FABP	741	9573	19	18	3	3	40.8	5.17	2.47	Quantitation summary for protein	129/126	0.883	7	[1.097]		130/126	0.564	7	1.046	*	131/126	0.556	7	1.069	*	129/127	1.051	7	1.037	*	130/127	0.686	7	[1.159]		131/127	0.65	6	1.062	*	129/128	0.768	7	1.053	*	130/128	0.471
507	gi|363737541	PREDICTED: mannose-6-phosphate isomerase [Gallus gallus]	739	49878	27	17	8	5	16	5.54	0.67	Quantitation summary for protein	129/126	0.973	21	[1.081]		130/126	0.825	21	1.089	*	131/126	0.839	21	1.125	*	129/127	1.246	20	1.084	*	130/127	0.915	20	1.042	*	131/127	0.877	20	1.058	*	129/128	1.242	21	1.063	*	130/128	1.068
508	gi|2516264	mu-calpain large subunit [Gallus gallus]	738	89720	35	29	9	9	14	5.78	0.43	Quantitation summary for protein	129/126	0.839	23	1.022	*	130/126	0.936	24	1.038	*	131/126	0.929	24	[1.025]		129/127	0.888	24	[1.030]		130/127	1.003	24	1.04		131/127	0.984	24	[1.030]		129/128	1.002	24	1.026		130/128	1.125
509	gi|53129679	hypothetical protein RCJMB04_5p10 [Gallus gallus]	735	40243	19	18	7	6	32.1	8.6	1.03	Quantitation summary for protein	129/126	0.92	19	1.069	*	130/126	1.022	19	[1.122]		131/126	1.172	19	1.101	*	129/127	0.942	19	[1.097]		130/127	1.069	19	1.079	*	131/127	1.213	19	1.079	*	129/128	0.876	19	1.044	*	130/128	0.987
510	gi|63434	unnamed protein product [Gallus gallus]	735	18955	25	25	3	3	24.6	10.27	2.7	Quantitation summary for protein	129/126	2.1	25	1.119	*	130/126	2.441	25	1.12	*	131/126	2.817	25	1.125	*	129/127	1.977	25	[1.128]		130/127	2.346	25	[1.129]		131/127	2.679	25	[1.137]		129/128	1.428	25	[1.082]		130/128	1.684
511	gi|363743244	PREDICTED: plasma membrane calcium-transporting ATPase 4 [Gallus gallus]	735	153860	44	30	14	11	13	5.64	0.29	Quantitation summary for protein	129/126	0.889	25	1.045	*	130/126	0.711	25	1.065	*	131/126	0.685	25	1.072	*	129/127	1.153	25	[1.036]		130/127	0.941	25	[1.060]		131/127	0.897	25	1.058	*	129/128	1.214	25	[1.061]		130/128	0.986
512	gi|53130422	hypothetical protein RCJMB04_7l20 [Gallus gallus]	735	80519	32	32	9	9	13.5	9.52	0.49	Quantitation summary for protein	129/126	1.337	21	1.019	*	130/126	1.057	22	1.029	*	131/126	1.338	22	1.032	*	129/127	0.998	21	1.019		130/127	0.805	22	1.034	*	131/127	1.008	22	1.029		129/128	1.062	22	1.019	*	130/128	0.865
513	gi|453474	acidic ribosomal phosphoprotein [Gallus gallus]	734	39247	37	28	13	11	48.1	5.72	2.65	Quantitation summary for protein	129/126	1.614	31	1.082	*	130/126	1.441	30	1.072	*	131/126	1.426	31	[1.084]		129/127	0.915	31	[1.059]		130/127	0.832	31	[1.052]		131/127	0.816	31	[1.052]		129/128	1.052	31	[1.044]		130/128	0.951
514	gi|53128989	hypothetical protein RCJMB04_5f14 [Gallus gallus]	730	24189	40	36	10	8	58.2	8.09	5.12	Quantitation summary for protein	129/126	1.019	32	1.024	*	130/126	0.909	34	1.048	*	131/126	1.1	34	1.033	*	129/127	1.023	34	[1.037]		130/127	0.944	34	1.074	*	131/127	1.13	34	[1.058]		129/128	1.177	34	[1.034]		130/128	1.08
515	gi|60098567	hypothetical protein RCJMB04_3m22 [Gallus gallus]	729	92715	59	41	21	16	28.8	8.29	1	Quantitation summary for protein	129/126	1.027	45	1.033	*	130/126	1.01	45	[1.062]		131/126	0.857	45	1.043	*	129/127	1.129	46	[1.039]		130/127	1.134	46	[1.071]		131/127	0.952	46	1.055	*	129/128	1.037	43	1.027	*	130/128	1.043
516	gi|53136692	hypothetical protein RCJMB04_32i2 [Gallus gallus]	728	19413	28	28	4	4	36.4	10.07	1.22	Quantitation summary for protein	129/126	1.095	28	1.027	*	130/126	1.159	28	1.043	*	131/126	1.134	28	1.034	*	129/127	0.733	28	1.028	*	130/127	0.792	28	1.045	*	131/127	0.768	28	[1.045]		129/128	0.839	28	1.03	*	130/128	0.901
517	gi|118082637	PREDICTED: NADH dehydrogenase [ubiquinone] 1 alpha subcomplex subunit 6 [Gallus gallus]	727	16908	26	25	4	4	33.6	9.81	1.99	Quantitation summary for protein	129/126	0.969	25	1.033	*	130/126	0.957	25	1.042	*	131/126	0.977	25	1.029	*	129/127	0.945	24	1.026	*	130/127	0.952	25	1.045	*	131/127	0.963	24	1.033	*	129/128	0.805	24	1.026	*	130/128	0.81
518	gi|53127438	hypothetical protein RCJMB04_2g17 [Gallus gallus]	727	40915	37	34	8	7	23.2	8.67	1.01	Quantitation summary for protein	129/126	1.898	35	1.054	*	130/126	1.423	35	[1.082]		131/126	1.957	35	1.068	*	129/127	1.382	35	1.037	*	130/127	1.057	35	[1.071]		131/127	1.439	35	[1.053]		129/128	1.354	35	1.039	*	130/128	1.029
519	gi|53136468	hypothetical protein RCJMB04_29h3 [Gallus gallus]	726	61573	38	33	11	8	23	5.42	0.97	Quantitation summary for protein	129/126	0.94	35	[1.038]		130/126	0.93	35	1.048	*	131/126	0.835	35	[1.037]		129/127	0.924	34	1.025	*	130/127	0.945	35	1.041	*	131/127	0.84	35	1.037	*	129/128	1.007	35	1.029		130/128	1.011
520	gi|363742034	PREDICTED: phosphopantothenate--cysteine ligase-like [Gallus gallus]	726	36040	25	23	10	8	43.9	6.47	1.21	Quantitation summary for protein	129/126	0.925	23	1.045	*	130/126	0.867	23	1.047	*	131/126	0.938	23	1.046	*	129/127	1.05	23	[1.044]		130/127	1.004	23	1.044		131/127	1.075	23	1.038	*	129/128	0.961	23	1.041	*	130/128	0.913
521	gi|148224812	NADH dehydrogenase [ubiquinone] 1 alpha subcomplex subunit 5 [Gallus gallus]	725	15273	31	27	7	7	67.2	6.59	5.06	Quantitation summary for protein	129/126	0.965	27	1.056	*	130/126	1.005	28	[1.070]		131/126	1.035	28	1.032	*	129/127	0.951	28	[1.056]		130/127	1.01	28	[1.070]		131/127	1.029	28	1.038	*	129/128	0.835	28	[1.049]		130/128	0.881
522	gi|50745986	PREDICTED: prefoldin subunit 3 [Gallus gallus]	724	27640	35	26	13	9	56.5	6.01	4.52	Quantitation summary for protein	129/126	0.853	31	1.054	*	130/126	0.897	31	1.039	*	131/126	0.909	31	1.043	*	129/127	0.925	31	[1.079]		130/127	0.993	31	[1.087]		131/127	0.996	31	[1.062]		129/128	0.929	31	1.036	*	130/128	0.948
523	gi|28569852	glycogen synthase [Gallus gallus]	722	30689	39	29	7	5	31.1	8.61	1.06	Quantitation summary for protein	129/126	1.02	26	[1.082]		130/126	0.867	26	[1.088]		131/126	0.711	26	1.064	*	129/127	0.826	26	[1.096]		130/127	0.607	19	1.046	*	131/127	0.581	26	1.065	*	129/128	1.111	26	1.023	*	130/128	0.958
524	gi|60098943	hypothetical protein RCJMB04_16d21 [Gallus gallus]	720	103495	47	36	19	14	22.4	5.9	0.75	Quantitation summary for protein	129/126	1.292	41	1.026	*	130/126	1.095	42	1.034	*	131/126	1.148	42	1.033	*	129/127	0.983	42	[1.035]		130/127	0.84	42	1.041	*	131/127	0.871	42	1.037	*	129/128	1.009	42	[1.022]		130/128	0.857
525	gi|53127806	hypothetical protein RCJMB04_3h11 [Gallus gallus]	719	89174	53	38	13	10	20.9	6.71	0.6	Quantitation summary for protein	129/126	0.975	43	[1.037]		130/126	0.787	43	1.049	*	131/126	0.821	43	1.035	*	129/127	1.035	43	[1.030]		130/127	0.853	43	1.057	*	131/127	0.88	43	1.036	*	129/128	1.067	43	1.027	*	130/128	0.873
526	gi|363739726	PREDICTED: enoyl-CoA delta isomerase 1, mitochondrial [Gallus gallus]	717	38653	27	26	10	10	34.4	9.3	1.68	Quantitation summary for protein	129/126	1.066	27	[1.065]		130/126	0.943	27	1.172		131/126	0.868	27	[1.134]		129/127	1.012	27	1.056		130/127	0.915	27	[1.151]		131/127	0.833	27	1.086	*	129/128	0.9	27	[1.084]		130/128	0.808
527	gi|148229985	B-cell receptor-associated protein 29 [Gallus gallus]	716	32846	29	28	6	5	28.4	9.16	0.62	Quantitation summary for protein	129/126	0.992	28	[1.039]		130/126	0.839	28	[1.037]		131/126	0.72	28	1.048	*	129/127	1.03	28	1.041	*	130/127	0.89	28	1.047	*	131/127	0.755	28	1.057	*	129/128	1.227	28	[1.020]		130/128	1.053
528	gi|363735257	PREDICTED: insulin-degrading enzyme [Gallus gallus]	716	146536	28	24	11	8	11.2	7.19	0.22	Quantitation summary for protein	129/126	1.147	22	1.023	*	130/126	0.857	24	1.072	*	131/126	0.88	24	[1.060]		129/127	1.056	24	[1.030]		130/127	0.805	24	1.071	*	131/127	0.817	24	1.058	*	129/128	1.006	24	[1.033]		130/128	0.762
529	gi|383087724	secernin 3 [Gallus gallus]	713	53978	22	19	10	8	23.1	5.62	0.92	Quantitation summary for protein	129/126	0.956	19	[1.056]		130/126	0.926	19	[1.120]		131/126	0.81	18	1.045	*	129/127	1.076	19	[1.058]		130/127	1.063	19	[1.130]		131/127	0.92	18	1.053	*	129/128	0.978	19	[1.031]		130/128	0.96
530	gi|212709	T-cadherin [Gallus gallus]	713	88871	58	38	18	16	26.7	4.91	1.38	Quantitation summary for protein	129/126	0.967	44	[1.048]		130/126	0.87	44	[1.104]		131/126	0.807	44	[1.067]		129/127	1.149	44	[1.037]		130/127	1.054	44	[1.114]		131/127	0.968	44	[1.074]		129/128	1.314	44	1.054	*	130/128	1.199
531	gi|215422358	proteasome (prosome, macropain) 26S subunit, non-ATPase, 4 [Gallus gallus]	709	46236	29	28	11	10	33.5	4.68	1.29	Quantitation summary for protein	129/126	1.069	29	1.045	*	130/126	1.175	29	[1.091]		131/126	1.193	29	[1.074]		129/127	0.985	29	1.035	*	130/127	1.104	29	[1.110]		131/127	1.109	29	[1.092]		129/128	1.1	29	1.034	*	130/128	1.226
532	gi|363728259	PREDICTED: alpha-2-macroglobulin-like protein 1-like [Gallus gallus]	708	223657	29	29	8	8	5.2	5.69	0.14	Quantitation summary for protein	129/126	1.927	29	[1.047]		130/126	1.146	29	1.029	*	131/126	1.701	29	1.049	*	129/127	1.31	29	1.022	*	130/127	0.795	29	1.034	*	131/127	1.168	29	[1.044]		129/128	1.524	29	[1.032]		130/128	0.919
533	gi|53128235	hypothetical protein RCJMB04_4k14 [Gallus gallus]	708	96310	63	41	14	12	17.2	6.39	0.77	Quantitation summary for protein	129/126	1.487	31	[1.045]		130/126	1.392	31	1.037	*	131/126	1.325	31	1.033	*	129/127	0.993	31	[1.027]		130/127	0.948	31	[1.037]		131/127	0.898	28	1.028	*	129/128	1.286	31	1.026	*	130/128	1.221
534	gi|211957	immunoglobulin heavy chain V-region, partial [Gallus gallus]	708	12393	31	28	5	5	50.5	9.34	4.5	Quantitation summary for protein	129/126	0.506	21	1.131	*	130/126	1.242	21	1.038	*	131/126	1.545	21	[1.066]		129/127	0.489	21	[1.110]		130/127	1.226	21	1.055	*	131/127	1.509	21	[1.075]		129/128	1.025	21	1.046	*	130/128	2.554
535	gi|363741621	PREDICTED: exportin-2 [Gallus gallus]	707	124628	43	38	16	13	16.9	5.41	0.59	Quantitation summary for protein	129/126	1.012	42	[1.045]		130/126	0.928	42	[1.052]		131/126	0.9	42	[1.061]		129/127	1.079	42	[1.037]		130/127	1.01	42	[1.051]		131/127	0.969	42	[1.057]		129/128	1.22	42	1.024	*	130/128	1.136
536	gi|53127442	hypothetical protein RCJMB04_2h4 [Gallus gallus]	706	67036	40	35	11	10	18.3	8.81	0.78	Quantitation summary for protein	129/126	1.111	40	[1.028]		130/126	0.97	40	[1.050]		131/126	0.933	40	1.046	*	129/127	1.096	40	1.02	*	130/127	0.92	39	1.042	*	131/127	0.93	40	1.046	*	129/128	1.264	40	[1.036]		130/128	1.12
537	gi|468204	actin capping protein beta subunit, isoform 2 [Gallus gallus]	706	36319	29	18	10	5	34.2	5.69	1.4	Quantitation summary for protein	129/126	1.218	2	1.043		130/126	0.937	2	1.038		131/126	1.277	2	1.001	*	129/127	1.14	2	1.072		130/127	0.895	2	1.067		131/127	1.208	2	1.029		129/128	1.371	2	1.031	*	130/128	1.07
538	gi|363730673	PREDICTED: AFG3-like protein 2 [Gallus gallus]	705	103232	28	21	15	10	17.1	8.91	0.41	Quantitation summary for protein	129/126	1.026	22	1.048	*	130/126	1.086	21	1.028	*	131/126	1.076	21	1.037	*	129/127	0.92	22	1.032	*	130/127	0.991	22	1.03		131/127	0.987	22	1.045		129/128	1.065	22	1.026	*	130/128	1.14
539	gi|4455121	osteoglycin [Gallus gallus]	703	37854	31	28	8	8	27.2	6.14	1.52	Quantitation summary for protein	129/126	0.855	29	[1.053]		130/126	0.889	29	[1.062]		131/126	1.011	29	[1.059]		129/127	1.045	29	1.035	*	130/127	1.109	29	1.049	*	131/127	1.247	29	1.053	*	129/128	0.933	29	1.023	*	130/128	0.984
540	gi|1708877	RecName: Full=Lumican; AltName: Full=Keratan sulfate proteoglycan lumican; Short=KSPG lumican; Flags: Precursor	702	44288	30	26	8	7	24.2	6.07	1.05	Quantitation summary for protein	129/126	0.821	26	1.046	*	130/126	0.848	27	1.111	*	131/126	0.952	27	[1.082]		129/127	1.125	26	1.038	*	130/127	1.197	27	[1.096]		131/127	1.33	27	[1.091]		129/128	0.946	27	1.064	*	130/128	0.997
541	gi|53135290	hypothetical protein RCJMB04_24m10 [Gallus gallus]	700	48868	43	32	15	10	41.9	5.29	1.66	Quantitation summary for protein	129/126	1.045	40	1.022	*	130/126	1.015	40	1.039	*	131/126	1.028	40	1.03	*	129/127	1.067	40	[1.024]		130/127	1.058	40	1.045	*	131/127	1.06	40	1.032	*	129/128	1.095	40	1.022	*	130/128	1.079
542	gi|118094764	PREDICTED: cystathionine gamma-lyase [Gallus gallus]	700	50742	27	27	9	9	20.6	6.86	0.88	Quantitation summary for protein	129/126	0.99	27	1.024	*	130/126	0.804	27	1.033	*	131/126	0.766	27	1.042	*	129/127	1.085	27	1.018	*	130/127	0.899	27	1.031	*	131/127	0.847	27	1.038	*	129/128	1.042	27	1.017	*	130/128	0.859
543	gi|53131920	hypothetical protein RCJMB04_12f15 [Gallus gallus]	700	66445	39	32	14	13	24.8	5.81	0.96	Quantitation summary for protein	129/126	1.104	35	1.037	*	130/126	0.978	35	[1.074]		131/126	1.07	35	1.043	*	129/127	1.103	35	1.045	*	130/127	0.997	35	[1.080]		131/127	1.08	35	1.046	*	129/128	0.896	35	1.024	*	130/128	0.805
544	gi|363736947	PREDICTED: 6-phosphofructokinase, liver type isoform 1 [Gallus gallus]	699	93342	24	22	5	5	7.5	7.21	0.36	Quantitation summary for protein	129/126	1.271	7	1.089	*	130/126	1.504	7	1.273	*	131/126	1.034	7	1.171		129/127	0.743	8	1.17	*	130/127	1.077	8	1.451		131/127	0.571	8	1.371	*	129/128	0.82	8	1.18	*	130/128	1.18
545	gi|53130406	hypothetical protein RCJMB04_7i14 [Gallus gallus]	696	48641	24	22	10	8	30.8	9.1	1.06	Quantitation summary for protein	129/126	0.984	23	1.04		130/126	0.88	23	1.049	*	131/126	0.828	23	[1.063]		129/127	0.956	23	[1.044]		130/127	0.873	23	[1.046]		131/127	0.812	23	1.044	*	129/128	0.961	23	1.028	*	130/128	0.871
546	gi|22128505	pyruvate carboxylase [Gallus gallus]	695	267810	36	28	16	14	14	6.26	0.2	Quantitation summary for protein	129/126	0.952	32	1.03	*	130/126	1.013	32	1.033	*	131/126	0.934	32	1.037	*	129/127	0.799	32	1.035	*	130/127	0.867	32	1.041	*	131/127	0.791	32	[1.053]		129/128	0.895	32	1.027	*	130/128	0.965
547	gi|53127216	hypothetical protein RCJMB04_1j22 [Gallus gallus]	695	67383	30	28	9	8	20.4	8.09	0.46	Quantitation summary for protein	129/126	0.972	29	[1.030]		130/126	0.869	29	[1.047]		131/126	0.926	29	[1.042]		129/127	1.053	29	[1.025]		130/127	0.961	29	[1.059]		131/127	1.013	29	[1.046]		129/128	1.011	28	1.019	*	130/128	0.926
548	gi|53130998	hypothetical protein RCJMB04_11a23 [Gallus gallus]	694	24898	28	25	7	6	46.9	5.75	2.11	Quantitation summary for protein	129/126	0.818	16	1.14	*	130/126	1.138	16	[1.196]		131/126	0.879	16	1.136	*	129/127	0.718	16	1.115	*	130/127	1.014	15	1.177		131/127	0.779	16	1.162	*	129/128	1.01	16	[1.110]		130/128	1.425
549	gi|363744612	PREDICTED: UV excision repair protein RAD23 homolog B [Gallus gallus]	694	47560	26	24	8	7	19.1	4.7	0.83	Quantitation summary for protein	129/126	1.06	25	[1.060]		130/126	0.977	25	[1.058]		131/126	1.048	25	[1.040]		129/127	1.065	25	[1.050]		130/127	1.002	25	1.045		131/127	1.063	25	1.034	*	129/128	1.041	25	[1.042]		130/128	0.974
550	gi|13516490	ribosomal protein S11 [Gallus gallus]	691	23548	32	27	7	6	32.9	10.31	1.9	Quantitation summary for protein	129/126	1.328	31	[1.034]		130/126	1.31	31	[1.068]		131/126	1.26	31	1.04	*	129/127	0.921	31	1.019	*	130/127	0.928	31	[1.091]		131/127	0.882	31	[1.060]		129/128	0.988	31	1.017	*	130/128	0.989
551	gi|118098842	PREDICTED: cytochrome b-c1 complex subunit 9-like [Gallus gallus]	691	8268	17	16	2	2	40.3	6.84	4.93	Quantitation summary for protein	129/126	1.011	17	1.066		130/126	0.905	17	1.066	*	131/126	0.943	17	1.059	*	129/127	1.122	17	[1.052]		130/127	1.026	17	[1.097]		131/127	1.057	17	[1.101]		129/128	0.797	17	1.075	*	130/128	0.724
552	gi|44968046	ribosomal protein L18 [Gallus gallus]	690	23020	29	28	6	6	36.7	11.84	1.59	Quantitation summary for protein	129/126	1.75	27	[1.083]		130/126	1.334	27	1.057	*	131/126	1.38	27	[1.054]		129/127	1.3	28	1.083	*	130/127	1.009	27	1.052		131/127	1.033	27	1.046	*	129/128	1.262	28	[1.056]		130/128	0.975
553	gi|53136880	hypothetical protein RCJMB04_35g11 [Gallus gallus]	684	61605	25	23	5	5	12.1	6.33	0.44	Quantitation summary for protein	129/126	2.134	24	[1.090]		130/126	1.348	24	1.089	*	131/126	2.511	24	[1.110]		129/127	2.296	24	[1.089]		130/127	1.481	24	[1.109]		131/127	2.728	24	[1.129]		129/128	1.611	24	[1.050]		130/128	1.033
554	gi|53133850	hypothetical protein RCJMB04_20p1 [Gallus gallus]	684	27814	29	19	6	5	31.8	5.11	0.97	Quantitation summary for protein	129/126	0.888	22	1.066	*	130/126	0.837	22	1.055	*	131/126	0.973	22	[1.059]		129/127	1.302	22	1.042	*	130/127	1.253	22	1.047	*	131/127	1.442	22	1.047	*	129/128	1.041	22	1.042	*	130/128	0.996
555	gi|89000611	immunoglobulin light chain variable region [Gallus gallus]	683	13990	35	35	3	3	27.7	8.67	0.92	Quantitation summary for protein	129/126	---	0	---		130/126	---	0	---		131/126	---	0	---		129/127	---	0	---		130/127	---	0	---		131/127	---	0	---		129/128	---	0	---		130/128	---
556	gi|50752381	PREDICTED: alpha-2-HS-glycoprotein [Gallus gallus]	680	41298	25	25	5	5	18.9	5.77	0.71	Quantitation summary for protein	129/126	0.838	25	1.046	*	130/126	0.779	25	1.048	*	131/126	0.783	25	1.05	*	129/127	1.007	25	1.033		130/127	0.956	25	1.045	*	131/127	0.95	25	1.039	*	129/128	1.024	25	1.023	*	130/128	0.966
557	gi|363740846	PREDICTED: nuclear protein localization protein 4 homolog [Gallus gallus]	676	77436	40	38	11	10	17.4	5.95	0.64	Quantitation summary for protein	129/126	1.204	40	[1.032]		130/126	0.842	40	1.075	*	131/126	0.9	40	1.068	*	129/127	1.157	40	[1.046]		130/127	0.826	40	[1.071]		131/127	0.874	40	[1.057]		129/128	1.118	40	1.014	*	130/128	0.793
558	gi|304423	sterol carrier protein-2, partial [Gallus gallus]	675	69993	31	23	8	7	13.9	8.49	0.58	Quantitation summary for protein	129/126	0.842	30	1.023	*	130/126	0.813	30	1.043	*	131/126	0.838	30	[1.037]		129/127	0.887	30	1.022	*	130/127	0.874	30	1.045	*	131/127	0.891	30	[1.038]		129/128	0.814	30	1.031	*	130/128	0.797
559	gi|363727954	PREDICTED: cytoskeleton-associated protein 4 [Gallus gallus]	674	67387	44	31	14	11	26.3	4.96	0.86	Quantitation summary for protein	129/126	1.436	34	[1.029]		130/126	1.033	34	1.03	*	131/126	1.402	34	1.028	*	129/127	0.966	34	1.019	*	130/127	0.71	34	1.038	*	131/127	0.953	34	[1.026]		129/128	1.108	34	1.019	*	130/128	0.809
560	gi|363741764	PREDICTED: mitochondrial import receptor subunit TOM34 [Gallus gallus]	672	38359	26	22	7	5	18.8	9.05	0.64	Quantitation summary for protein	129/126	0.867	22	1.026	*	130/126	1.051	22	[1.058]		131/126	0.971	22	1.049	*	129/127	0.945	22	[1.027]		130/127	1.169	22	1.064	*	131/127	1.069	22	[1.048]		129/128	1.019	22	1.022	*	130/128	1.253
561	gi|60098469	hypothetical protein RCJMB04_2k14 [Gallus gallus]	672	87606	32	29	12	11	21	6.17	0.61	Quantitation summary for protein	129/126	1.073	30	[1.063]		130/126	1.015	30	[1.051]		131/126	1.144	30	[1.107]		129/127	0.995	30	[1.039]		130/127	0.96	30	[1.068]		131/127	1.071	30	[1.102]		129/128	1.044	30	1.056	*	130/128	1.002
562	gi|53130318	hypothetical protein RCJMB04_6o19 [Gallus gallus]	671	58460	34	26	10	7	20.2	5.53	0.64	Quantitation summary for protein	129/126	1.272	30	[1.025]		130/126	1.199	30	1.036	*	131/126	1.077	30	1.035	*	129/127	0.818	30	1.013	*	130/127	0.787	30	1.041	*	131/127	0.699	30	[1.044]		129/128	1.011	30	1.019	*	130/128	0.967
563	gi|53133816	hypothetical protein RCJMB04_20k1 [Gallus gallus]	671	36381	51	42	11	10	37.4	10.83	2.1	Quantitation summary for protein	129/126	1.705	44	1.058	*	130/126	1.451	44	1.047	*	131/126	1.416	44	1.052	*	129/127	1.119	44	[1.025]		130/127	0.972	44	[1.046]		131/127	0.938	44	[1.042]		129/128	1.179	44	[1.036]		130/128	1.018
564	gi|226874900	proteasome subunit alpha type-2 [Gallus gallus]	670	29455	21	18	7	5	26.5	6.97	1.12	Quantitation summary for protein	129/126	1.042	19	1.022	*	130/126	0.86	20	1.04	*	131/126	1.003	20	1.032		129/127	1.039	20	1.026	*	130/127	0.888	20	1.045	*	131/127	1.025	20	1.038	*	129/128	0.913	20	1.023	*	130/128	0.775
565	gi|118090355	PREDICTED: synaptopodin-2 [Gallus gallus]	670	159380	29	23	6	5	4.8	9.11	0.18	Quantitation summary for protein	129/126	1.386	28	1.053	*	130/126	1.101	28	1.061	*	131/126	1.331	28	1.062	*	129/127	1.234	28	[1.064]		130/127	1.001	28	1.061		131/127	1.197	28	1.055	*	129/128	0.815	28	1.041	*	130/128	0.657
566	gi|355390334	delta-1-pyrroline-5-carboxylate dehydrogenase, mitochondrial [Gallus gallus]	666	68665	45	33	14	8	20.1	8.22	0.52	Quantitation summary for protein	129/126	0.892	35	1.023	*	130/126	0.957	35	1.039	*	131/126	0.88	35	[1.036]		129/127	0.952	35	[1.017]		130/127	1.044	35	[1.043]		131/127	0.95	35	[1.037]		129/128	1.039	34	1.014	*	130/128	1.134
567	gi|363736256	PREDICTED: striated muscle-specific serine/threonine-protein kinase-like [Gallus gallus]	666	359700	39	30	12	9	4.8	7.44	0.09	Quantitation summary for protein	129/126	1.216	31	1.044	*	130/126	1.173	31	1.077	*	131/126	1.128	31	1.06	*	129/127	0.921	31	1.051	*	130/127	0.907	31	1.089	*	131/127	0.817	26	1.032	*	129/128	0.853	31	1.055	*	130/128	0.835
568	gi|50755665	PREDICTED: ribosomal protein L3-like [Gallus gallus]	665	59446	48	34	14	11	33.9	10.25	1.37	Quantitation summary for protein	129/126	1.718	40	1.054	*	130/126	1.448	40	1.052	*	131/126	1.359	40	1.042	*	129/127	0.994	40	[1.054]		130/127	0.86	39	1.042	*	131/127	0.794	40	1.057	*	129/128	1.145	40	1.029	*	130/128	0.979
569	gi|157829888	Chain A, Calmodulin Mutant With A Two Residue Deletion In The Central Helix	664	18515	47	40	6	5	39	4.11	2.81	Quantitation summary for protein	129/126	---	0	---		130/126	---	0	---		131/126	---	0	---		129/127	---	0	---		130/127	---	0	---		131/127	---	0	---		129/128	---	0	---		130/128	---
570	gi|363745440	PREDICTED: importin subunit beta-1-like [Gallus gallus]	660	106649	40	29	12	11	16.3	4.69	0.53	Quantitation summary for protein	129/126	0.939	32	[1.039]		130/126	0.97	32	1.05	*	131/126	0.825	32	1.049	*	129/127	0.977	32	1.032	*	130/127	1.03	32	1.057	*	131/127	0.867	32	[1.064]		129/128	1.145	32	1.053	*	130/128	1.199
571	gi|363741113	PREDICTED: eukaryotic translation initiation factor 4H-like isoform 1 [Gallus gallus]	658	31113	42	36	8	6	31.9	7.77	1.76	Quantitation summary for protein	129/126	1.065	38	1.052	*	130/126	1.271	38	[1.121]		131/126	1.331	38	1.1	*	129/127	1.094	38	1.047	*	130/127	1.332	38	[1.129]		131/127	1.38	38	1.1	*	129/128	0.934	38	1.049	*	130/128	1.13
572	gi|62972	proteasome C1 subunit [Gallus gallus]	658	23565	26	22	9	8	52	9	2.31	Quantitation summary for protein	129/126	1.055	26	1.083	*	130/126	0.91	26	1.093	*	131/126	1.025	26	1.073		129/127	1.073	26	1.089	*	130/127	0.945	26	1.113	*	131/127	1.054	26	[1.078]		129/128	0.993	26	1.096		130/128	0.869
573	gi|363744954	PREDICTED: glyoxylate reductase/hydroxypyruvate reductase [Gallus gallus]	657	38802	24	23	9	9	25.2	8.14	1.26	Quantitation summary for protein	129/126	1.451	22	1.1	*	130/126	1.187	22	1.066	*	131/126	1.177	22	1.064	*	129/127	1.237	22	1.046	*	130/127	1.032	22	1.093		131/127	1.013	23	1.07		129/128	1.103	23	1.058	*	130/128	0.914
574	gi|53130732	hypothetical protein RCJMB04_9m1 [Gallus gallus]	656	78414	44	39	20	17	27.8	5.89	1.18	Quantitation summary for protein	129/126	0.964	38	1.031	*	130/126	0.98	40	[1.068]		131/126	1.012	40	[1.047]		129/127	0.921	40	[1.045]		130/127	0.957	40	[1.065]		131/127	0.977	40	[1.046]		129/128	0.996	40	[1.027]		130/128	1.028
575	gi|363743735	PREDICTED: perilipin-3-like [Gallus gallus]	652	51375	37	30	12	11	30.1	6.03	1.24	Quantitation summary for protein	129/126	1.195	36	1.051	*	130/126	0.866	36	[1.048]		131/126	0.912	36	1.043	*	129/127	1.179	36	[1.049]		130/127	0.872	36	1.047	*	131/127	0.908	36	1.036	*	129/128	1.027	36	1.025	*	130/128	0.755
576	gi|118092623	PREDICTED: inorganic pyrophosphatase [Gallus gallus]	650	39317	49	35	9	9	31.7	5.53	2.36	Quantitation summary for protein	129/126	0.908	30	1.035	*	130/126	0.919	29	1.034	*	131/126	0.918	30	1.04	*	129/127	0.95	30	1.035	*	130/127	1.014	30	[1.060]		131/127	0.97	30	1.048	*	129/128	0.991	30	1.037		130/128	1.051
577	gi|1531769	rab5C-like protein [Gallus gallus]	650	26975	23	20	7	7	43.1	8.64	2.21	Quantitation summary for protein	129/126	1.124	13	1.048	*	130/126	0.791	13	1.053	*	131/126	0.913	13	[1.055]		129/127	1.236	13	[1.045]		130/127	0.887	13	1.06	*	131/127	1.014	13	1.076		129/128	1.678	13	1.06	*	130/128	1.197
578	gi|363737680	PREDICTED: probable threonyl-tRNA synthetase 2, cytoplasmic [Gallus gallus]	650	104065	38	31	8	7	9.7	6.55	0.28	Quantitation summary for protein	129/126	1.024	10	1.061		130/126	1.127	10	1.044	*	131/126	0.979	10	1.08		129/127	0.878	10	1.037	*	130/127	0.987	10	1.052		131/127	0.899	9	1.042	*	129/128	1.126	10	1.043	*	130/128	1.258
579	gi|363728587	PREDICTED: DDB1- and CUL4-associated factor 6 [Gallus gallus]	649	128243	25	21	9	8	9.7	5.63	0.22	Quantitation summary for protein	129/126	0.9	22	1.076	*	130/126	0.726	21	1.126	*	131/126	0.713	22	1.104	*	129/127	0.795	22	1.065	*	130/127	0.654	21	1.138	*	131/127	0.639	21	1.09	*	129/128	0.886	22	1.063	*	130/128	0.726
580	gi|53136628	hypothetical protein RCJMB04_31o2 [Gallus gallus]	649	48208	52	31	14	10	41	9.4	1.89	Quantitation summary for protein	129/126	0.93	35	1.039	*	130/126	0.99	35	1.058		131/126	1.001	35	1.042		129/127	0.924	35	1.035	*	130/127	1.004	35	1.071		131/127	1.005	35	1.051		129/128	0.921	35	1.045	*	130/128	0.994
581	gi|363729530	PREDICTED: hemopexin [Gallus gallus]	647	45365	25	20	10	8	44.4	5.36	1.32	Quantitation summary for protein	129/126	2.75	20	1.312	*	130/126	1.464	20	1.192	*	131/126	2.517	20	1.343	*	129/127	2.74	21	1.2	*	130/127	1.444	19	1.163	*	131/127	2.537	21	1.253	*	129/128	2.202	21	1.186	*	130/128	1.191
582	gi|3309261	signal transducer and activator of transcription 5B [Gallus gallus]	642	100390	37	26	14	11	18	5.9	0.52	Quantitation summary for protein	129/126	1.246	25	1.026	*	130/126	0.974	25	1.033	*	131/126	0.921	25	1.029	*	129/127	0.935	25	1.024	*	130/127	0.746	25	1.049	*	131/127	0.698	25	1.052	*	129/128	1.019	25	1.021	*	130/128	0.808
583	gi|402507	ribosomal protein L30 [Gallus gallus]	641	16414	22	20	6	5	44.3	9.65	3.48	Quantitation summary for protein	129/126	1.808	18	1.066	*	130/126	1.913	20	1.092	*	131/126	1.876	20	[1.119]		129/127	0.891	20	1.031	*	130/127	0.957	20	[1.083]		131/127	0.929	20	1.068	*	129/128	1.15	19	1.037	*	130/128	1.22
584	gi|53136442	hypothetical protein RCJMB04_29b18 [Gallus gallus]	640	26121	27	25	10	9	57.6	5.58	3.78	Quantitation summary for protein	129/126	1.07	27	1.049	*	130/126	1.012	27	[1.090]		131/126	1.022	27	[1.073]		129/127	0.991	27	1.034		130/127	0.957	27	[1.096]		131/127	0.956	27	[1.069]		129/128	0.848	27	[1.037]		130/128	0.813
585	gi|50753780	PREDICTED: programmed cell death protein 5 [Gallus gallus]	640	16960	32	25	8	6	65.1	5.53	7.84	Quantitation summary for protein	129/126	0.967	31	[1.102]		130/126	1.042	31	[1.093]		131/126	1	31	[1.078]		129/127	1.123	31	[1.088]		130/127	1.235	31	[1.087]		131/127	1.174	31	[1.114]		129/128	1.001	31	1.059		130/128	1.095
586	gi|118093564	PREDICTED: protein lunapark [Gallus gallus]	639	53189	35	29	10	10	27.9	5.33	0.82	Quantitation summary for protein	129/126	0.945	33	1.033	*	130/126	1.031	33	[1.057]		131/126	0.785	33	[1.043]		129/127	0.962	33	[1.035]		130/127	1.071	33	[1.059]		131/127	0.81	32	1.034	*	129/128	1.203	33	1.033	*	130/128	1.331
587	gi|363732056	PREDICTED: laminin subunit alpha-4 [Gallus gallus]	639	230913	23	21	9	8	5	5.99	0.12	Quantitation summary for protein	129/126	1.19	21	[1.063]		130/126	1.33	21	1.051	*	131/126	1.442	21	1.056	*	129/127	1.083	21	[1.127]		130/127	1.235	21	[1.086]		131/127	1.325	21	[1.108]		129/128	1.038	21	[1.084]		130/128	1.176
588	gi|363741734	PREDICTED: alpha-1-syntrophin-like, partial [Gallus gallus]	635	37390	31	26	9	8	27.6	7.72	1.15	Quantitation summary for protein	129/126	1.092	28	1.039	*	130/126	1.114	28	1.032	*	131/126	1.306	28	1.036	*	129/127	1.082	28	[1.031]		130/127	1.127	28	[1.032]		131/127	1.307	28	1.034	*	129/128	1.008	27	1.022		130/128	1.048
589	gi|118083913	PREDICTED: probable ubiquitin carboxyl-terminal hydrolase FAF-X isoform 2 [Gallus gallus]	635	324908	29	26	9	8	3.7	5.56	0.08	Quantitation summary for protein	129/126	1.181	26	[1.025]		130/126	1.139	26	1.06	*	131/126	0.906	26	1.037	*	129/127	0.89	26	1.034	*	130/127	0.877	26	[1.074]		131/127	0.69	26	1.061	*	129/128	1.176	25	1.026	*	130/128	1.13
590	gi|60099067	hypothetical protein RCJMB04_22h1 [Gallus gallus]	633	98844	33	27	14	12	19.9	6.36	0.68	Quantitation summary for protein	129/126	1.066	29	1.022	*	130/126	1.083	29	1.04	*	131/126	1.056	29	1.035	*	129/127	0.916	29	1.024	*	130/127	0.951	29	1.046	*	131/127	0.918	29	1.042	*	129/128	1.082	28	1.017	*	130/128	1.114
591	gi|18252632	zipcode-binding protein [Gallus gallus]	631	88613	31	28	12	11	16.5	6.46	0.49	Quantitation summary for protein	129/126	1.135	27	1.022	*	130/126	1.067	27	1.029	*	131/126	1.217	27	1.038	*	129/127	0.971	27	1.048	*	130/127	0.93	26	1.041	*	131/127	1.052	27	[1.042]		129/128	1.107	27	1.036	*	130/128	1.056
592	gi|118088890	PREDICTED: 40S ribosomal protein S7 isoform 6 [Gallus gallus]	630	41832	34	28	7	7	30.1	9.89	2.37	Quantitation summary for protein	129/126	1.319	30	[1.117]		130/126	1.293	30	1.111	*	131/126	1.343	30	1.096	*	129/127	0.874	31	1.094	*	130/127	0.874	31	1.126	*	131/127	0.899	31	1.111	*	129/128	0.872	30	1.058	*	130/128	0.868
593	gi|60098591	hypothetical protein RCJMB04_3o5 [Gallus gallus]	628	103505	29	27	13	11	18	6.19	0.55	Quantitation summary for protein	129/126	1.128	29	1.028	*	130/126	0.908	28	1.038	*	131/126	0.875	29	1.023	*	129/127	1.042	29	1.027	*	130/127	0.855	28	1.037	*	131/127	0.817	29	1.027	*	129/128	1.16	29	1.026	*	130/128	0.945
594	gi|20160386	FK506 binding protein 12.6 [Gallus gallus]	625	14126	19	15	3	2	29.6	9.03	1.38	Quantitation summary for protein	129/126	0.989	15	1.059		130/126	1.578	15	1.122	*	131/126	1.624	14	1.095	*	129/127	1.086	15	1.036	*	130/127	1.768	15	[1.097]		131/127	1.662	15	1.095	*	129/128	0.943	15	[1.035]		130/128	1.526
595	gi|477661	translation initiation factor eIF-5A II [validated] - chicken (fragment)	623	13069	31	26	5	4	38.1	9.4	4.07	Quantitation summary for protein	129/126	---	0	---		130/126	---	0	---		131/126	---	0	---		129/127	---	0	---		130/127	---	0	---		131/127	---	0	---		129/128	---	0	---		130/128	---
596	gi|363729116	PREDICTED: importin-5 [Gallus gallus]	623	145224	46	37	17	16	18.1	4.89	0.53	Quantitation summary for protein	129/126	0.944	41	1.05	*	130/126	0.959	41	1.054	*	131/126	0.896	41	1.061	*	129/127	0.926	41	1.044	*	130/127	0.96	41	[1.055]		131/127	0.887	41	[1.062]		129/128	1.033	41	[1.070]		130/128	1.065
597	gi|363736425	PREDICTED: calcium-binding mitochondrial carrier protein SCaMC-1 [Gallus gallus]	622	60433	32	28	10	9	21.5	9.04	0.61	Quantitation summary for protein	129/126	0.913	29	1.021	*	130/126	0.985	30	1.04	*	131/126	0.963	30	1.037	*	129/127	0.968	30	[1.027]		130/127	1.048	30	1.049	*	131/127	1.013	30	1.041		129/128	0.981	30	1.021	*	130/128	1.055
598	gi|2506056	calpain small subunit [Gallus gallus]	619	26076	24	18	7	7	38.3	5.05	1.96	Quantitation summary for protein	129/126	0.968	20	1.104		130/126	0.944	20	1.23		131/126	0.896	20	1.089	*	129/127	0.992	20	[1.088]		130/127	0.987	20	[1.163]		131/127	0.927	20	1.082	*	129/128	1.028	20	1.104		130/128	1.016
599	gi|298231107	integrin beta-1 precursor [Gallus gallus]	617	104930	29	28	9	9	11.2	5.14	0.4	Quantitation summary for protein	129/126	1.035	29	1.034	*	130/126	0.96	29	[1.048]		131/126	1.016	29	1.035	*	129/127	0.999	29	1.035		130/127	0.945	29	[1.056]		131/127	0.99	29	1.038		129/128	1.04	29	1.038	*	130/128	0.978
600	gi|242347880	importin alpha 4 [Gallus gallus]	616	60853	23	20	7	7	13.9	4.66	0.61	Quantitation summary for protein	129/126	1.126	14	1.041	*	130/126	0.87	14	1.034	*	131/126	0.827	14	1.058	*	129/127	1.05	13	1.02	*	130/127	0.837	14	1.054	*	131/127	0.787	14	1.051	*	129/128	1.14	14	1.034	*	130/128	0.893
601	gi|363730221	PREDICTED: glutamate decarboxylase-like protein 1 [Gallus gallus]	615	69861	23	23	5	5	7.6	7.08	0.32	Quantitation summary for protein	129/126	0.695	23	1.027	*	130/126	0.763	23	[1.034]		131/126	0.809	23	[1.025]		129/127	0.572	23	1.029	*	130/127	0.633	22	1.03	*	131/127	0.673	23	[1.027]		129/128	0.725	23	1.022	*	130/128	0.817
602	gi|308191432	RecName: Full=Glycine amidinotransferase, mitochondrial; AltName: Full=L-arginine:glycine amidinotransferase; AltName: Full=Transamidinase; Flags: Precursor	612	54579	33	22	10	7	22.3	8.24	0.8	Quantitation summary for protein	129/126	1.081	28	1.042	*	130/126	1.124	28	1.045	*	131/126	1.099	28	1.047	*	129/127	0.787	28	[1.042]		130/127	0.835	28	1.055	*	131/127	0.809	28	1.045	*	129/128	1.201	28	1.02	*	130/128	1.266
603	gi|53133158	hypothetical protein RCJMB04_14j19 [Gallus gallus]	611	80427	30	25	15	13	26	8.56	0.82	Quantitation summary for protein	129/126	0.972	26	1.03	*	130/126	0.913	26	1.04	*	131/126	0.908	26	1.041	*	129/127	0.952	26	1.034	*	130/127	0.913	26	1.057	*	131/127	0.899	26	1.052	*	129/128	1.063	26	1.027	*	130/128	1.201
604	gi|84873344	5~-AMP-activated protein kinase alpha-2 catalytic subunit [Gallus gallus]	611	70994	30	26	11	9	18.1	7.31	0.64	Quantitation summary for protein	129/126	1.182	17	1.042	*	130/126	1.113	18	1.024	*	131/126	1.005	18	1.033		129/127	0.738	18	[1.048]		130/127	0.716	18	[1.059]		131/127	0.64	18	1.053	*	129/128	0.861	18	1.028	*	130/128	0.831
605	gi|118101792	PREDICTED: cytosolic 5~-nucleotidase 1A [Gallus gallus]	611	46730	32	27	12	10	43.3	6.29	1.43	Quantitation summary for protein	129/126	1.097	30	1.049	*	130/126	1.19	31	1.061	*	131/126	1.06	31	[1.061]		129/127	1.05	31	[1.038]		130/127	1.162	31	1.061	*	131/127	1.025	31	[1.050]		129/128	1.009	31	[1.052]		130/128	1.111
606	gi|363727569	PREDICTED: cullin-associated NEDD8-dissociated protein 1 isoform 2 [Gallus gallus]	611	152872	34	32	9	7	6.5	5.49	0.21	Quantitation summary for protein	129/126	0.994	6	1.04		130/126	0.981	6	1.062		131/126	0.88	6	1.032	*	129/127	1.09	4	1.008	*	130/127	1.117	6	1.116		131/127	0.992	6	1.052		129/128	1.262	6	1.034	*	130/128	1.263
607	gi|118093076	PREDICTED: BAG family molecular chaperone regulator 3 isoform 1 [Gallus gallus]	610	68818	38	29	11	10	26.4	5.85	0.67	Quantitation summary for protein	129/126	0.88	28	[1.040]		130/126	1.134	28	[1.070]		131/126	1.066	28	[1.049]		129/127	1.275	28	[1.067]		130/127	1.676	28	[1.101]		131/127	1.56	28	1.088	*	129/128	1.048	28	1.044	*	130/128	1.369
608	gi|12964602	branched-chain alpha-keto acid dihydrolipoyl acyltransferase [Gallus gallus]	607	63072	31	25	10	7	21.9	8.75	0.66	Quantitation summary for protein	129/126	0.917	31	[1.046]		130/126	0.989	31	[1.055]		131/126	1.093	31	[1.057]		129/127	1.067	31	1.034	*	130/127	1.175	31	1.047	*	131/127	1.285	31	1.04	*	129/128	0.788	31	[1.047]		130/128	0.862
609	gi|16904069	adipocyte fatty acid binding protein [Gallus gallus]	606	18436	25	22	7	5	50	6.34	4.37	Quantitation summary for protein	129/126	1.268	16	[1.138]		130/126	0.877	16	[1.124]		131/126	0.698	16	[1.100]		129/127	1.357	16	[1.163]		130/127	0.958	16	[1.100]		131/127	0.755	16	1.077	*	129/128	1.11	16	1.034	*	130/128	0.779
610	gi|53133726	hypothetical protein RCJMB04_19l10 [Gallus gallus]	605	34911	22	20	6	6	18.2	6.97	1.06	Quantitation summary for protein	129/126	0.89	20	1.038	*	130/126	0.961	20	1.057	*	131/126	0.853	20	[1.049]		129/127	0.866	20	1.038	*	130/127	0.954	20	[1.072]		131/127	0.837	20	[1.056]		129/128	0.937	20	[1.046]		130/128	1.025
611	gi|60098769	hypothetical protein RCJMB04_8c13 [Gallus gallus]	604	36944	17	14	6	4	23.5	4.13	0.67	Quantitation summary for protein	129/126	1.323	16	1.074	*	130/126	0.982	16	1.072		131/126	1.11	16	[1.080]		129/127	1.046	16	1.051	*	130/127	0.792	16	1.064	*	131/127	0.886	16	1.065	*	129/128	1.095	16	1.042	*	130/128	0.824
612	gi|53130462	hypothetical protein RCJMB04_7p19 [Gallus gallus]	603	44158	25	25	9	9	30.7	4.98	1.06	Quantitation summary for protein	129/126	1.25	24	1.04	*	130/126	0.988	24	1.052		131/126	1.129	24	1.04	*	129/127	1	24	[1.047]		130/127	0.807	24	1.065	*	131/127	0.912	24	1.034	*	129/128	1.021	24	[1.056]		130/128	0.819
613	gi|308081891	xin actin-binding repeat-containing protein 1 [Gallus gallus]	602	337985	37	28	19	14	7.8	5.6	0.18	Quantitation summary for protein	129/126	1.424	31	1.039	*	130/126	0.971	31	[1.042]		131/126	0.876	31	1.052	*	129/127	1.192	32	1.033	*	130/127	0.829	32	1.053	*	131/127	0.74	32	1.066	*	129/128	0.988	32	1.027	*	130/128	0.683
614	gi|363740107	PREDICTED: AP-1 complex subunit beta-1 [Gallus gallus]	602	119735	17	16	10	9	14.1	4.93	0.34	Quantitation summary for protein	129/126	1.086	11	1.031	*	130/126	0.963	11	1.082		131/126	0.941	10	1.056	*	129/127	1.026	12	1.149		130/127	0.921	11	[1.173]		131/127	0.902	11	[1.211]		129/128	1.217	12	1.044	*	130/128	1.09
615	gi|53127702	hypothetical protein RCJMB04_2p21 [Gallus gallus]	601	35374	19	19	4	4	16.3	4.45	0.56	Quantitation summary for protein	129/126	0.947	19	1.032	*	130/126	1.067	18	1.027	*	131/126	1.09	19	1.034	*	129/127	0.888	19	[1.036]		130/127	1.017	19	[1.029]		131/127	1.032	19	1.037	*	129/128	0.995	18	1.016		130/128	1.128
616	gi|363732737	PREDICTED: cysteine and histidine-rich domain-containing protein 1 [Gallus gallus]	601	49788	50	37	12	10	30.9	5.68	1.45	Quantitation summary for protein	129/126	1.018	40	1.032	*	130/126	1.014	40	1.036	*	131/126	0.985	40	1.029	*	129/127	0.974	40	1.029	*	130/127	0.991	40	[1.037]		131/127	0.952	40	1.032	*	129/128	1.014	40	1.02	*	130/128	1.025
617	gi|88908538	RecName: Full=26S proteasome non-ATPase regulatory subunit 13; AltName: Full=26S proteasome regulatory subunit RPN9; AltName: Full=26S proteasome regulatory subunit S11; AltName: Full=26S proteasome regulatory subunit p40.5	601	48280	29	26	11	11	32.2	5.37	1.88	Quantitation summary for protein	129/126	1.117	28	1.043	*	130/126	0.992	28	1.059		131/126	0.946	28	1.056	*	129/127	1.128	28	1.043	*	130/127	1.023	28	[1.068]		131/127	0.964	28	[1.057]		129/128	1.215	28	1.036	*	130/128	1.095
618	gi|53136582	hypothetical protein RCJMB04_31d24 [Gallus gallus]	599	40045	28	23	8	6	26.1	7.68	0.89	Quantitation summary for protein	129/126	1.248	24	1.064	*	130/126	0.819	24	1.066	*	131/126	0.975	23	1.028	*	129/127	1.239	24	[1.059]		130/127	0.83	24	1.067	*	131/127	0.883	24	1.046	*	129/128	0.978	24	[1.054]		130/128	0.651
619	gi|727428	Rous sarcoma virus transcription enhancer factor II [Gallus gallus]	596	35817	25	23	7	6	23.8	10.73	0.86	Quantitation summary for protein	129/126	1.75	22	[1.099]		130/126	0.673	21	[1.117]		131/126	0.861	22	1.087	*	129/127	1.706	22	1.092	*	130/127	0.671	21	[1.122]		131/127	0.848	22	[1.096]		129/128	1.011	21	1.023	*	130/128	0.394
620	gi|53130362	hypothetical protein RCJMB04_7e3 [Gallus gallus]	596	40554	31	18	7	5	27.5	9.53	1.03	Quantitation summary for protein	129/126	1.118	28	1.087	*	130/126	0.893	28	1.105	*	131/126	0.87	28	1.064	*	129/127	1.155	28	1.074	*	130/127	0.942	28	1.11	*	131/127	0.908	28	1.069	*	129/128	0.851	28	1.064	*	130/128	0.69
621	gi|3746660	otokeratin [Gallus gallus]	595	61104	45	33	13	7	20.5	5.97	1.2	Quantitation summary for protein	129/126	0.268	6	1.463	*	130/126	0.559	6	1.188	*	131/126	0.517	6	[1.282]		129/127	0.539	6	1.225	*	130/127	1.149	6	1.132	*	131/127	1.051	6	1.149		129/128	0.772	5	1.073	*	130/128	1.847
622	gi|793834	ribosomal protein S6 [Gallus gallus]	595	36829	30	22	10	7	28.5	10.83	1.17	Quantitation summary for protein	129/126	1.243	22	1.054	*	130/126	1.494	22	[1.085]		131/126	1.404	22	1.06	*	129/127	0.873	22	1.043	*	130/127	1.071	22	[1.086]		131/127	0.995	22	[1.063]		129/128	0.995	22	[1.035]		130/128	1.213
623	gi|363730985	PREDICTED: junctophilin-1 [Gallus gallus]	593	95724	39	27	15	11	19.8	9.44	0.77	Quantitation summary for protein	129/126	1.138	30	1.047	*	130/126	0.905	31	[1.083]		131/126	0.895	31	1.059	*	129/127	1.115	31	1.053	*	130/127	0.906	31	[1.073]		131/127	0.886	31	[1.073]		129/128	0.885	31	[1.057]		130/128	0.715
624	gi|118099288	PREDICTED: carnitine O-acetyltransferase [Gallus gallus]	590	82326	46	35	16	16	19	8.74	1.02	Quantitation summary for protein	129/126	1.243	40	[1.053]		130/126	1.353	40	[1.100]		131/126	1.418	40	[1.073]		129/127	1.176	40	1.052	*	130/127	1.307	40	[1.108]		131/127	1.356	40	[1.082]		129/128	0.824	40	[1.049]		130/128	0.911
625	gi|62983	ribosomal protein L5 [Gallus gallus]	590	42777	39	31	10	10	27.3	9.73	1.84	Quantitation summary for protein	129/126	1.32	35	1.067	*	130/126	1.407	34	1.043	*	131/126	1.525	35	1.058	*	129/127	0.96	35	[1.042]		130/127	1.114	35	[1.070]		131/127	1.121	35	[1.050]		129/128	1.148	34	1.036	*	130/128	1.378
626	gi|53127378	hypothetical protein RCJMB04_2a21 [Gallus gallus]	587	46558	21	19	6	6	25.5	6.12	0.62	Quantitation summary for protein	129/126	0.995	14	[1.080]		130/126	1.037	14	1.074		131/126	1.232	14	1.038	*	129/127	0.942	14	[1.110]		130/127	1.002	14	1.156		131/127	1.178	14	1.123	*	129/128	0.969	14	1.096		130/128	1.024
627	gi|53126513	hypothetical protein RCJMB04_1d23 [Gallus gallus]	585	28358	29	23	10	7	42.2	5.22	2.4	Quantitation summary for protein	129/126	0.97	26	1.05	*	130/126	0.844	26	[1.086]		131/126	0.958	26	[1.074]		129/127	1.055	25	1.047	*	130/127	0.846	25	1.076	*	131/127	1.044	26	[1.090]		129/128	1.032	26	[1.076]		130/128	0.912
628	gi|53136700	hypothetical protein RCJMB04_32j11 [Gallus gallus]	584	27265	29	23	6	5	28.8	8.29	1	Quantitation summary for protein	129/126	0.925	17	1.049	*	130/126	0.743	17	1.059	*	131/126	0.671	17	[1.036]		129/127	0.989	16	1.018	*	130/127	0.828	17	1.075	*	131/127	0.74	17	1.042	*	129/128	1.291	17	[1.034]		130/128	1.053
629	gi|363734711	PREDICTED: LOW QUALITY PROTEIN: importin-7 [Gallus gallus]	583	133058	26	22	9	9	11.7	4.68	0.31	Quantitation summary for protein	129/126	1.073	24	1.038	*	130/126	0.889	24	1.066	*	131/126	0.827	24	1.058	*	129/127	1.037	24	[1.054]		130/127	0.877	24	1.059	*	131/127	0.807	24	1.056	*	129/128	1.173	24	1.04	*	130/128	0.985
630	gi|363738693	PREDICTED: cAMP-dependent protein kinase type II-alpha regulatory subunit-like [Gallus gallus]	582	50971	29	26	8	8	23.2	4.8	1.12	Quantitation summary for protein	129/126	1	29	1.035		130/126	0.827	29	1.045	*	131/126	0.873	29	1.04	*	129/127	0.999	29	[1.088]		130/127	0.843	29	[1.118]		131/127	0.881	29	[1.107]		129/128	0.946	29	1.039	*	130/128	0.793
631	gi|50742739	PREDICTED: 40S ribosomal protein S12 [Gallus gallus]	582	18830	33	31	4	4	31.8	6.81	1.68	Quantitation summary for protein	129/126	1.413	33	1.084	*	130/126	1.17	33	[1.089]		131/126	1.167	33	1.077	*	129/127	1.023	33	[1.094]		130/127	0.864	33	1.066	*	131/127	0.854	33	1.06	*	129/128	1.001	33	[1.035]		130/128	0.84
632	gi|995778	cThy28kD [Gallus gallus]	581	35396	34	27	8	7	38	8.32	1.45	Quantitation summary for protein	129/126	1.305	31	[1.078]		130/126	1.108	31	1.077	*	131/126	1.147	31	[1.092]		129/127	1.066	31	[1.049]		130/127	0.924	31	1.08	*	131/127	0.946	31	1.05	*	129/128	1.125	31	1.055	*	130/128	0.968
633	gi|363746258	PREDICTED: ubiquitin-like modifier-activating enzyme 1-like, partial [Gallus gallus]	581	16253	26	22	3	2	22.1	6.28	0.77	Quantitation summary for protein	129/126	0.855	23	[1.034]		130/126	0.911	23	1.021	*	131/126	0.875	23	[1.027]		129/127	0.936	23	1.019	*	130/127	1.017	23	1.019	*	131/127	0.972	22	1.015	*	129/128	1.142	23	1.019	*	130/128	1.234
634	gi|53134209	hypothetical protein RCJMB04_22n3 [Gallus gallus]	579	38172	44	28	14	10	44.9	5.63	1.71	Quantitation summary for protein	129/126	0.962	32	1.025	*	130/126	0.656	33	1.078	*	131/126	0.755	33	1.057	*	129/127	1.045	33	1.027	*	130/127	0.732	33	1.084	*	131/127	0.834	33	1.065	*	129/128	0.997	33	1.027		130/128	0.695
635	gi|118104488	PREDICTED: phospholipase A-2-activating protein [Gallus gallus]	578	99163	28	23	12	10	18.1	5.89	0.53	Quantitation summary for protein	129/126	1.226	25	[1.042]		130/126	1.137	25	1.048	*	131/126	1.071	25	1.046	*	129/127	1.137	25	1.038	*	130/127	1.077	25	1.058	*	131/127	1.003	25	1.051		129/128	1.258	25	[1.056]		130/128	1.184
636	gi|53132504	hypothetical protein RCJMB04_13i11 [Gallus gallus]	577	104985	38	26	17	12	25.7	6.37	0.54	Quantitation summary for protein	129/126	1.098	27	[1.049]		130/126	1.179	27	1.058	*	131/126	1.094	27	1.045	*	129/127	0.98	27	1.038	*	130/127	1.075	27	[1.077]		131/127	0.987	27	[1.061]		129/128	1.061	27	1.02	*	130/128	1.157
637	gi|363744876	PREDICTED: hydroxysteroid dehydrogenase-like protein 2-like isoform 1 [Gallus gallus]	577	53084	27	23	9	9	23.5	8.5	0.94	Quantitation summary for protein	129/126	1.236	25	[1.089]		130/126	1.304	25	1.1	*	131/126	1.233	25	1.09	*	129/127	1.089	25	[1.069]		130/127	1.173	25	1.107	*	131/127	1.097	25	[1.095]		129/128	1.045	25	1.028	*	130/128	1.119
638	gi|363737017	PREDICTED: propionyl-CoA carboxylase beta chain, mitochondrial [Gallus gallus]	576	63364	21	20	9	8	22.1	6.8	0.58	Quantitation summary for protein	129/126	1.051	20	1.043	*	130/126	1.167	20	1.047	*	131/126	1.134	20	1.039	*	129/127	0.977	20	1.033	*	130/127	1.107	20	1.043	*	131/127	1.064	20	1.025	*	129/128	0.964	20	1.046	*	130/128	1.086
639	gi|53136516	hypothetical protein RCJMB04_30d2 [Gallus gallus]	572	26135	12	12	2	2	10.7	9.68	0.44	Quantitation summary for protein	129/126	1.383	12	1.058	*	130/126	1.147	12	1.044	*	131/126	1.15	12	1.067	*	129/127	0.848	12	[1.051]		130/127	0.717	12	1.083	*	131/127	0.7	11	1.03	*	129/128	0.887	12	1.03	*	130/128	0.746
640	gi|34541988	UBP [Gallus gallus]	568	148090	35	33	13	12	14.3	5.37	0.33	Quantitation summary for protein	129/126	1.165	34	1.038	*	130/126	1.038	34	1.075	*	131/126	1.025	34	[1.061]		129/127	1.074	34	1.041	*	130/127	0.977	34	[1.072]		131/127	0.954	34	1.061	*	129/128	0.932	33	1.026	*	130/128	0.846
641	gi|3641556	fibrinogen gamma chain precursor [Gallus gallus]	567	56598	34	29	12	9	20.5	5.48	0.86	Quantitation summary for protein	129/126	1.78	33	1.04	*	130/126	1.142	33	1.062	*	131/126	1.218	33	1.051	*	129/127	1.215	33	1.018	*	130/127	0.796	33	[1.060]		131/127	0.84	33	[1.047]		129/128	1.113	33	1.022	*	130/128	0.725
642	gi|118098010	PREDICTED: nodal modulator 1 [Gallus gallus]	567	150018	27	19	8	5	8	5.42	0.19	Quantitation summary for protein	129/126	0.992	26	1.039		130/126	1.022	26	1.032	*	131/126	1.044	26	1.043	*	129/127	0.928	26	1.029	*	130/127	0.976	26	[1.030]		131/127	0.986	26	1.025	*	129/128	0.875	26	1.024	*	130/128	0.9
643	gi|363746976	PREDICTED: T-complex protein 1 subunit gamma [Gallus gallus]	566	18807	16	14	5	4	42.4	6.43	3.42	Quantitation summary for protein	129/126	0.923	14	1.122	*	130/126	0.925	14	[1.127]		131/126	0.885	13	1.15	*	129/127	0.947	15	1.149		130/127	0.971	15	1.124		131/127	0.922	14	[1.218]		129/128	0.975	15	1.135		130/128	0.993
644	gi|363737348	PREDICTED: prothymosin alpha-like [Gallus gallus]	565	10158	22	21	3	3	19.2	3.54	3.31	Quantitation summary for protein	129/126	0.874	22	1.095	*	130/126	1.291	22	[1.146]		131/126	1.371	22	1.11	*	129/127	0.947	22	1.054	*	130/127	1.428	22	1.182	*	131/127	1.5	22	1.134	*	129/128	1.22	22	1.088	*	130/128	1.829
645	gi|118086692	PREDICTED: muscle-related coiled-coil protein [Gallus gallus]	565	49176	39	32	9	7	23.8	8.96	0.91	Quantitation summary for protein	129/126	2.044	35	1.077	*	130/126	1.733	35	1.051	*	131/126	1.539	35	1.054	*	129/127	1.163	35	[1.044]		130/127	1.006	35	1.049		131/127	0.884	35	1.07	*	129/128	0.653	35	1.046	*	130/128	0.561
646	gi|263505112	RecName: Full=Peroxiredoxin-1	565	27570	38	25	11	7	35.7	8.24	3.42	Quantitation summary for protein	129/126	0.985	28	1.077		130/126	0.997	28	[1.099]		131/126	1.077	28	[1.081]		129/127	1.182	28	1.066	*	130/127	1.221	28	1.11	*	131/127	1.305	28	1.088	*	129/128	1.004	28	[1.047]		130/128	1.031
647	gi|16323037	DEAD box protein DDX1 [Gallus gallus]	564	97208	30	22	10	6	13.8	6.64	0.3	Quantitation summary for protein	129/126	1.013	24	1.04		130/126	1.058	24	1.057	*	131/126	1.066	25	1.053	*	129/127	0.811	25	1.053	*	130/127	0.865	24	1.049	*	131/127	0.863	25	1.045	*	129/128	0.858	25	1.034	*	130/128	0.916
648	gi|303304963	26S proteasome non-ATPase regulatory subunit 14 [Gallus gallus]	564	39528	34	24	9	6	28.4	6	0.9	Quantitation summary for protein	129/126	1.105	25	[1.062]		130/126	0.876	25	1.14	*	131/126	0.931	25	[1.109]		129/127	1.073	25	[1.054]		130/127	0.868	25	1.151	*	131/127	0.913	25	[1.118]		129/128	1.037	25	1.052	*	130/128	0.834
649	gi|131121	RecName: Full=Parvalbumin, muscle	564	15830	42	30	9	5	56.9	4.94	7.42	Quantitation summary for protein	129/126	0.031	34	[1.415]		130/126	0.038	34	1.323	*	131/126	0.032	34	1.396	*	129/127	0.483	34	[1.229]		130/127	0.599	34	1.18	*	131/127	0.491	34	1.239	*	129/128	0.954	32	1.077	*	130/128	1.175
650	gi|50806588	PREDICTED: 60S ribosomal protein L17 [Gallus gallus]	564	27799	38	24	6	6	35.9	10.2	1.48	Quantitation summary for protein	129/126	1.787	28	1.063	*	130/126	1.416	28	1.062	*	131/126	1.489	27	1.053	*	129/127	0.965	28	1.043	*	130/127	0.78	28	1.056	*	131/127	0.807	28	1.05	*	129/128	1.056	28	[1.025]		130/128	0.849
651	gi|53127063	hypothetical protein RCJMB04_1i19 [Gallus gallus]	563	58916	31	24	8	8	22.9	8.77	0.92	Quantitation summary for protein	129/126	1.096	28	[1.050]		130/126	1.195	28	[1.059]		131/126	1.189	28	[1.059]		129/127	0.951	28	1.032	*	130/127	1.053	27	1.041	*	131/127	1.041	28	1.044	*	129/128	1.268	28	1.056	*	130/128	1.402
652	gi|363737678	PREDICTED: IQ motif containing GTPase activating protein 1 [Gallus gallus]	563	231218	22	18	12	9	9.8	6.22	0.17	Quantitation summary for protein	129/126	1.126	21	1.067	*	130/126	1.214	20	1.079	*	131/126	1.171	21	[1.079]		129/127	1.045	20	1.042	*	130/127	1.228	21	[1.167]		131/127	1.11	21	[1.141]		129/128	1.154	21	1.065	*	130/128	1.333
653	gi|363736407	PREDICTED: LOW QUALITY PROTEIN: laminin subunit gamma-1 [Gallus gallus]	562	198722	35	26	17	12	11	4.97	0.26	Quantitation summary for protein	129/126	0.997	28	1.023		130/126	1.175	29	1.042	*	131/126	1.189	29	1.031	*	129/127	0.839	29	[1.033]		130/127	1.024	29	[1.049]		131/127	1.025	29	[1.032]		129/128	0.901	29	1.024	*	130/128	1.094
654	gi|732995	pre-fibrinogen alpha subunit [Gallus gallus]	561	65016	35	26	11	6	19.4	6.82	0.41	Quantitation summary for protein	129/126	2.032	28	[1.063]		130/126	1.07	28	[1.073]		131/126	1.227	28	1.091	*	129/127	1.42	28	[1.065]		130/127	0.763	28	[1.078]		131/127	0.866	28	1.094	*	129/128	1.068	28	1.032	*	130/128	0.571
655	gi|60098755	hypothetical protein RCJMB04_7n20 [Gallus gallus]	560	82734	35	25	12	10	19.2	5.66	0.66	Quantitation summary for protein	129/126	1.378	28	1.082	*	130/126	1.503	28	[1.110]		131/126	1.309	28	1.071	*	129/127	0.765	28	[1.041]		130/127	0.852	28	[1.137]		131/127	0.734	28	1.107	*	129/128	0.887	28	1.036	*	130/128	0.982
656	gi|46519238	complement C3 precursor [Gallus gallus]	559	11160	32	32	3	3	30.5	6.54	1.92	Quantitation summary for protein	129/126	1.739	2	1.253		130/126	1.263	2	1.054		131/126	1.783	2	1.184		129/127	1.441	2	1.146		130/127	1.068	2	1.037		131/127	1.491	2	1.083		129/128	1.691	2	1.153		130/128	1.245
657	gi|60098969	hypothetical protein RCJMB04_17g4 [Gallus gallus]	559	61492	31	27	10	9	18.5	6.09	0.77	Quantitation summary for protein	129/126	0.976	28	1.034	*	130/126	1.107	28	1.028	*	131/126	1.035	28	1.024	*	129/127	1.053	28	1.017	*	130/127	1.218	27	1.04	*	131/127	1.129	28	1.03	*	129/128	0.855	28	1.026	*	130/128	0.985
658	gi|363728304	PREDICTED: alpha-2-macroglobulin [Gallus gallus]	558	189101	27	21	11	8	8	6.09	0.21	Quantitation summary for protein	129/126	2.08	26	1.106	*	130/126	1.091	26	1.06	*	131/126	1.723	26	1.077	*	129/127	1.617	26	1.085	*	130/127	0.865	25	1.063	*	131/127	1.353	26	1.081	*	129/128	1.646	26	1.061	*	130/128	0.876
659	gi|118084259	PREDICTED: 60S ribosomal protein L31 [Gallus gallus]	558	18323	37	35	5	5	32.8	10.54	3.58	Quantitation summary for protein	129/126	1.834	37	1.05	*	130/126	1.493	37	[1.056]		131/126	1.499	37	[1.054]		129/127	1.007	37	[1.039]		130/127	0.836	37	[1.070]		131/127	0.831	37	[1.058]		129/128	1.016	37	1.033	*	130/128	0.839
660	gi|2655422	CDC37 [Gallus gallus]	556	54514	36	30	13	9	31.3	5.24	1.56	Quantitation summary for protein	129/126	0.98	18	[1.053]		130/126	0.996	18	[1.123]		131/126	0.967	18	1.085		129/127	0.923	18	1.03	*	130/127	0.958	18	[1.139]		131/127	0.92	18	1.103	*	129/128	1.054	18	1.052	*	130/128	1.087
661	gi|363728601	PREDICTED: 1,4-alpha-glucan-branching enzyme [Gallus gallus]	553	99828	35	25	12	11	14.7	7.66	0.57	Quantitation summary for protein	129/126	0.859	33	1.027	*	130/126	1.017	33	[1.059]		131/126	0.828	33	[1.039]		129/127	0.915	32	1.019	*	130/127	1.102	33	[1.063]		131/127	0.888	33	[1.043]		129/128	1.097	31	1.017	*	130/128	1.32
662	gi|5509946	p32 subunit of splicing factor SF2 [Gallus gallus]	549	27449	22	21	6	5	19.3	4.41	1.5	Quantitation summary for protein	129/126	0.945	20	[1.105]		130/126	1.146	20	1.126	*	131/126	1.222	20	1.085	*	129/127	0.855	21	1.05	*	130/127	1.054	21	[1.170]		131/127	1.115	20	1.108	*	129/128	0.831	21	1.043	*	130/128	1.018
663	gi|60098985	hypothetical protein RCJMB04_18a15 [Gallus gallus]	548	73641	24	21	8	7	14.5	8.18	0.55	Quantitation summary for protein	129/126	1.531	23	1.087	*	130/126	1.597	23	[1.101]		131/126	1.509	23	1.09	*	129/127	1.122	23	[1.070]		130/127	1.193	23	[1.132]		131/127	1.116	23	[1.107]		129/128	0.899	23	[1.047]		130/128	0.95
664	gi|60098771	hypothetical protein RCJMB04_8i9 [Gallus gallus]	548	27829	26	22	10	10	51.8	5.64	2.88	Quantitation summary for protein	129/126	0.998	26	1.048		130/126	0.874	26	1.058	*	131/126	0.857	26	1.054	*	129/127	0.968	26	[1.032]		130/127	0.865	26	1.048	*	131/127	0.84	26	1.045	*	129/128	1.157	26	1.038	*	130/128	1.028
665	gi|53127989	hypothetical protein RCJMB04_4h13 [Gallus gallus]	548	24477	26	23	6	6	34.2	5.65	1.78	Quantitation summary for protein	129/126	0.906	6	1.109		130/126	0.879	6	1.077	*	131/126	0.895	6	1.088	*	129/127	0.946	6	1.136		130/127	0.937	6	1.114		131/127	0.944	6	1.126		129/128	1.314	6	1.149	*	130/128	1.294
666	gi|22218070	ovoglycoprotein precursor [Gallus gallus]	547	24827	36	27	6	5	18.7	5.11	1.74	Quantitation summary for protein	129/126	3.491	27	1.14	*	130/126	1.985	27	1.091	*	131/126	3.73	27	1.101	*	129/127	3.563	27	[1.117]		130/127	2.068	27	[1.105]		131/127	3.845	27	[1.102]		129/128	3.252	27	1.108	*	130/128	1.877
667	gi|50806228	PREDICTED: erlin-2 [Gallus gallus]	546	45239	24	19	5	5	14.9	5.52	0.64	Quantitation summary for protein	129/126	0.954	21	1.04	*	130/126	0.935	22	1.05	*	131/126	0.941	21	1.038	*	129/127	1.021	22	[1.037]		130/127	1.019	22	1.049		131/127	1.014	22	1.042		129/128	1.003	22	[1.048]		130/128	0.995
668	gi|62938	myosin regulatory light chain, isoform L20-B1 [Gallus gallus]	543	23393	25	24	5	4	38.4	4.67	0.71	Quantitation summary for protein	129/126	1.273	24	1.025	*	130/126	1.104	24	[1.045]		131/126	1.211	24	[1.044]		129/127	0.837	23	1.017	*	130/127	0.751	24	[1.035]		131/127	0.814	24	1.034	*	129/128	0.956	24	1.018	*	130/128	0.841
669	gi|32967298	calcineurin A alpha, partial [Gallus gallus]	540	64437	28	27	9	8	17.5	5.9	0.73	Quantitation summary for protein	129/126	0.962	19	1.024	*	130/126	0.988	19	[1.023]		131/126	0.89	19	1.033	*	129/127	0.969	19	1.025	*	130/127	1.016	19	1.022	*	131/127	0.905	19	1.03	*	129/128	0.926	19	[1.027]		130/128	0.959
670	gi|118085838	PREDICTED: probable acyl coa dehydrogenase 6-like [Gallus gallus]	538	50559	15	14	4	4	14.1	8.37	0.29	Quantitation summary for protein	129/126	0.997	15	1.025		130/126	0.915	15	1.046	*	131/126	1.042	15	1.04	*	129/127	1.014	15	1.034		130/127	0.981	14	1.038		131/127	1.071	15	1.06	*	129/128	1.016	15	1.027	*	130/128	0.946
671	gi|1850772	aminopeptidase H [Gallus gallus]	538	60960	17	15	7	6	20.7	5.64	0.52	Quantitation summary for protein	129/126	0.903	16	1.108	*	130/126	1.003	16	1.258		131/126	1.028	16	1.188		129/127	1.058	16	[1.098]		130/127	1.199	16	1.282	*	131/127	1.216	16	1.21	*	129/128	0.958	16	1.098		130/128	1.079
672	gi|363744316	PREDICTED: histidine triad nucleotide-binding protein 2, mitochondrial-like [Gallus gallus]	535	17993	16	16	5	5	43.7	9.56	1.81	Quantitation summary for protein	129/126	1.182	16	1.103	*	130/126	1.039	16	1.084		131/126	1.262	16	1.11	*	129/127	1.17	16	[1.104]		130/127	1.049	16	1.096		131/127	1.275	15	1.095	*	129/128	1.112	16	1.044	*	130/128	0.991
673	gi|53131155	hypothetical protein RCJMB04_11f2 [Gallus gallus]	535	26282	34	33	5	5	27	6.75	0.82	Quantitation summary for protein	129/126	0.968	34	[1.021]		130/126	0.927	34	1.015	*	131/126	0.92	34	[1.026]		129/127	1.057	34	[1.029]		130/127	1.034	34	1.021	*	131/127	1.016	34	1.017	*	129/128	1.108	34	1.018	*	130/128	1.077
674	gi|53130426	hypothetical protein RCJMB04_7m14 [Gallus gallus]	535	103504	21	18	8	8	13.8	5.38	0.32	Quantitation summary for protein	129/126	0.973	18	1.05	*	130/126	1.007	19	[1.109]		131/126	1.022	19	1.086		129/127	0.889	19	1.044	*	130/127	0.936	19	[1.110]		131/127	0.941	19	1.083	*	129/128	1.036	19	[1.058]		130/128	1.084
675	gi|53127772	hypothetical protein RCJMB04_3f15 [Gallus gallus]	535	23812	22	21	6	6	29.8	5.37	1.51	Quantitation summary for protein	129/126	1.066	21	1.024	*	130/126	0.888	21	1.033	*	131/126	0.973	22	1.039	*	129/127	1.15	22	1.032	*	130/127	0.982	22	[1.057]		131/127	1.061	22	[1.024]		129/128	1.13	22	1.04	*	130/128	0.96
676	gi|363730351	PREDICTED: succinate-semialdehyde dehydrogenase, mitochondrial [Gallus gallus]	534	61570	23	19	11	10	19.8	8.77	0.68	Quantitation summary for protein	129/126	1.001	20	1.052		130/126	0.882	20	[1.099]		131/126	0.865	20	[1.065]		129/127	1.06	20	1.042	*	130/127	0.953	20	[1.115]		131/127	0.925	20	[1.078]		129/128	0.906	20	[1.035]		130/128	0.81
677	gi|53130868	hypothetical protein RCJMB04_10k21 [Gallus gallus]	534	62759	31	24	12	10	26.1	6.66	0.75	Quantitation summary for protein	129/126	0.833	22	[1.034]		130/126	0.921	22	1.017	*	131/126	0.855	22	1.026	*	129/127	0.749	22	1.023	*	130/127	0.847	21	1.02	*	131/127	0.777	22	1.029	*	129/128	0.952	22	1.022	*	130/128	1.068
678	gi|363745992	PREDICTED: ATP synthase subunit delta, mitochondrial-like, partial [Gallus gallus]	533	14648	17	13	3	2	23.6	4.49	3.31	Quantitation summary for protein	129/126	0.923	12	1.068	*	130/126	1.338	13	1.067	*	131/126	1.252	13	1.062	*	129/127	0.922	12	1.075	*	130/127	1.357	13	1.11	*	131/127	1.256	13	1.067	*	129/128	0.85	13	1.105	*	130/128	1.233
679	gi|118102270	PREDICTED: mitogen-activated protein kinase 14 isoform 1 [Gallus gallus]	533	46702	22	20	5	5	19.4	5.35	0.51	Quantitation summary for protein	129/126	0.897	11	1.2		130/126	1.004	11	1.127		131/126	0.926	11	1.177		129/127	0.959	11	1.086		130/127	1.095	11	1.13	*	131/127	0.999	11	1.138		129/128	0.982	11	1.1		130/128	1.115
680	gi|53131694	hypothetical protein RCJMB04_12b11 [Gallus gallus]	532	38273	24	22	9	8	27.4	4.77	1.49	Quantitation summary for protein	129/126	1.092	24	1.04	*	130/126	0.985	24	1.142		131/126	0.905	24	[1.077]		129/127	1.131	24	1.036	*	130/127	1.041	24	1.159		131/127	0.947	24	1.097	*	129/128	1.075	24	[1.045]		130/128	0.984
681	gi|53136418	hypothetical protein RCJMB04_28l17 [Gallus gallus]	532	124178	30	24	13	12	17.5	5.7	0.44	Quantitation summary for protein	129/126	1.128	28	[1.051]		130/126	1.007	28	1.055		131/126	1.012	28	[1.054]		129/127	0.916	28	[1.030]		130/127	0.835	28	1.071	*	131/127	0.83	28	1.067	*	129/128	1.2	26	1.026	*	130/128	1.067
682	gi|53136894	hypothetical protein RCJMB04_35l12 [Gallus gallus]	532	72844	26	19	8	5	15.2	9.12	0.42	Quantitation summary for protein	129/126	1.056	22	1.04	*	130/126	0.982	22	1.054		131/126	0.997	22	[1.079]		129/127	1.052	22	1.042	*	130/127	0.999	22	1.057		131/127	1.004	22	1.073		129/128	0.877	22	1.025	*	130/128	0.828
683	gi|53126936	hypothetical protein RCJMB04_1h23 [Gallus gallus]	531	58637	27	23	7	4	14.1	9.57	0.39	Quantitation summary for protein	129/126	1.168	26	[1.016]		130/126	0.964	26	[1.027]		131/126	1.031	26	[1.017]		129/127	1.161	26	[1.018]		130/127	0.979	26	1.024	*	131/127	1.035	26	[1.024]		129/128	1.206	26	1.014	*	130/128	1.01
684	gi|50760377	PREDICTED: ras-related protein Rap-1A isoform 2 [Gallus gallus]	530	25455	21	20	5	5	30.4	6.4	1.1	Quantitation summary for protein	129/126	0.941	2	1.004	*	130/126	0.924	2	1.006	*	131/126	0.904	2	1.034		129/127	1.06	2	1.058		130/127	1.063	2	1.048		131/127	1.029	2	1.018		129/128	1.591	2	1.175		130/128	1.586
685	gi|3851612	succinate dehydrogenase Ip subunit [Gallus gallus]	526	39561	39	20	11	9	32.4	9.13	1.84	Quantitation summary for protein	129/126	0.815	28	1.051	*	130/126	1.122	28	[1.035]		131/126	0.952	28	1.043	*	129/127	0.819	28	[1.047]		130/127	1.151	28	1.06	*	131/127	0.967	28	1.056	*	129/128	0.988	28	1.034		130/128	1.38
686	gi|50749406	PREDICTED: eukaryotic translation initiation factor 3 subunit F [Gallus gallus]	526	38099	12	10	4	4	15.7	5.34	0.52	Quantitation summary for protein	129/126	1.113	11	1.092	*	130/126	1.075	12	1.164		131/126	1.13	12	1.105	*	129/127	0.855	12	1.107	*	130/127	0.864	12	1.115	*	131/127	0.899	12	1.172	*	129/128	0.955	12	1.073	*	130/128	0.96
687	gi|53130528	hypothetical protein RCJMB04_8i12 [Gallus gallus]	524	123362	31	23	11	9	12	7.13	0.3	Quantitation summary for protein	129/126	1.007	29	1.04		130/126	0.918	29	1.067	*	131/126	0.959	28	1.058	*	129/127	0.973	30	1.039	*	130/127	0.906	30	1.059	*	131/127	0.942	30	1.057	*	129/128	0.992	30	[1.025]		130/128	0.918
688	gi|53134115	hypothetical protein RCJMB04_22k15 [Gallus gallus]	523	62021	26	19	9	6	17.8	6.51	0.44	Quantitation summary for protein	129/126	0.976	20	1.035	*	130/126	0.812	19	[1.146]		131/126	0.927	19	1.062	*	129/127	1.093	19	1.038	*	130/127	0.928	19	[1.125]		131/127	1.048	19	1.052	*	129/128	1.126	20	1.046	*	130/128	0.951
689	gi|363737664	PREDICTED: huntingtin-interacting protein K-like, partial [Gallus gallus]	522	16622	14	14	5	5	41.7	4.78	2.65	Quantitation summary for protein	129/126	0.869	14	1.077	*	130/126	0.976	14	1.078		131/126	1.03	14	1.05	*	129/127	0.98	14	[1.080]		130/127	1.124	14	1.101	*	131/127	1.174	14	1.07	*	129/128	0.944	14	1.084	*	130/128	1.076
690	gi|363736657	PREDICTED: ubiquitin carboxyl-terminal hydrolase 24 [Gallus gallus]	521	325292	32	27	16	14	6.7	5.78	0.16	Quantitation summary for protein	129/126	1.152	27	[1.054]		130/126	1.181	27	[1.055]		131/126	0.986	27	[1.045]		129/127	0.94	27	[1.025]		130/127	0.984	27	[1.077]		131/127	0.813	27	1.036	*	129/128	1.135	27	[1.021]		130/128	1.18
691	gi|118102980	PREDICTED: keratin, type I cytoskeletal 12 [Gallus gallus]	520	60322	26	19	5	4	5.7	4.86	0.53	Quantitation summary for protein	129/126	0.371	14	1.121	*	130/126	0.528	14	[1.168]		131/126	0.595	14	[1.091]		129/127	0.673	14	1.065	*	130/127	0.978	14	[1.116]		131/127	1.09	14	1.055	*	129/128	0.839	14	1.055	*	130/128	1.212
692	gi|363746072	PREDICTED: neuroblast differentiation-associated protein AHNAK-like [Gallus gallus]	520	62404	49	29	17	11	36.9	8.36	1.16	Quantitation summary for protein	129/126	1.047	38	1.033	*	130/126	0.904	38	[1.043]		131/126	1.05	38	1.037	*	129/127	1.114	38	1.029	*	130/127	0.982	38	[1.044]		131/127	1.129	38	1.039	*	129/128	1.008	38	[1.022]		130/128	0.883
693	gi|269784816	dolichyl-diphosphooligosaccharide--protein glycosyltransferase 48 kDa subunit [Gallus gallus]	520	53375	24	22	7	6	14.8	5.37	0.61	Quantitation summary for protein	129/126	1.035	24	1.027	*	130/126	1.027	24	1.037	*	131/126	1.17	24	1.045	*	129/127	0.93	23	1.029	*	130/127	0.943	24	[1.048]		131/127	1.062	23	1.037	*	129/128	1.068	24	[1.026]		130/128	1.076
694	gi|30268674	proteasome subunit Z [Gallus gallus]	519	33637	28	20	4	3	15.5	5.99	0.33	Quantitation summary for protein	129/126	0.931	25	[1.058]		130/126	0.889	25	[1.035]		131/126	0.927	25	[1.037]		129/127	0.992	25	[1.062]		130/127	0.968	25	[1.033]		131/127	0.998	25	[1.030]		129/128	0.832	25	1.016	*	130/128	0.806
695	gi|50728788	PREDICTED: 3-mercaptopyruvate sulfurtransferase isoform 2 [Gallus gallus]	518	38298	25	19	11	6	36	5.8	1.11	Quantitation summary for protein	129/126	0.91	20	1.041	*	130/126	0.876	21	1.052	*	131/126	0.923	21	1.058	*	129/127	1.088	21	[1.045]		130/127	1.052	21	[1.048]		131/127	1.096	21	1.049	*	129/128	0.954	21	1.05	*	130/128	0.916
696	gi|363733468	PREDICTED: starch-binding domain-containing protein 1 [Gallus gallus]	518	42567	37	26	7	7	21.3	4.59	0.96	Quantitation summary for protein	129/126	1.013	35	1.035	*	130/126	0.953	35	1.054	*	131/126	0.876	35	1.069	*	129/127	0.892	35	[1.048]		130/127	0.856	35	1.068	*	131/127	0.779	35	1.073	*	129/128	1.036	35	1.034	*	130/128	0.988
697	gi|53136844	hypothetical protein RCJMB04_34o8 [Gallus gallus]	516	25131	24	21	8	6	36.5	8.18	2.08	Quantitation summary for protein	129/126	0.989	21	[1.073]		130/126	0.985	20	1.105		131/126	0.971	20	1.077		129/127	1.143	21	[1.085]		130/127	1.162	20	1.098	*	131/127	1.133	20	1.071	*	129/128	0.978	21	1.049		130/128	0.989
698	gi|118087865	PREDICTED: MOSC domain-containing protein 1, mitochondrial [Gallus gallus]	516	42470	30	21	9	7	22.2	9	0.82	Quantitation summary for protein	129/126	0.902	25	[1.031]		130/126	1.199	25	1.051	*	131/126	0.97	25	1.063	*	129/127	0.899	25	1.028	*	130/127	1.22	25	1.047	*	131/127	0.976	25	1.058	*	129/128	1.148	25	[1.045]		130/128	1.55
699	gi|363731527	PREDICTED: glycerophosphocholine phosphodiesterase GPCPD1 [Gallus gallus]	516	89890	25	21	10	9	14.3	5.8	0.54	Quantitation summary for protein	129/126	1.247	24	1.04	*	130/126	0.938	24	1.053	*	131/126	1.224	24	[1.045]		129/127	1.173	24	1.032	*	130/127	0.901	24	1.059	*	131/127	1.163	24	1.044	*	129/128	1.222	24	1.044	*	130/128	0.932
700	gi|363732033	PREDICTED: BAG family molecular chaperone regulator 2 [Gallus gallus]	515	42834	25	19	7	6	21.9	9.74	0.68	Quantitation summary for protein	129/126	1.165	20	1.047	*	130/126	1.176	20	[1.050]		131/126	1.107	20	1.048	*	129/127	0.972	20	[1.049]		130/127	1.001	20	1.056		131/127	0.932	20	1.052	*	129/128	0.946	20	[1.062]		130/128	0.968
701	gi|313760551	S-adenosylmethionine synthase isoform type-1 [Gallus gallus]	514	50197	32	23	6	5	14.6	6.28	0.56	Quantitation summary for protein	129/126	1.178	27	[1.037]		130/126	1.161	27	1.03	*	131/126	1.129	27	1.03	*	129/127	0.924	27	[1.028]		130/127	0.93	27	[1.049]		131/127	0.895	27	[1.039]		129/128	1.008	27	1.018	*	130/128	1.008
702	gi|118092615	PREDICTED: calcium uniporter protein, mitochondrial [Gallus gallus]	513	43964	21	20	7	6	24.1	9.06	0.66	Quantitation summary for protein	129/126	1.008	20	1.031		130/126	0.864	20	1.061	*	131/126	0.934	20	1.05	*	129/127	1.058	20	1.037	*	130/127	0.926	20	1.059	*	131/127	0.991	20	1.049		129/128	1.018	20	[1.059]		130/128	0.885
703	gi|313661454	chaperone activity of bc1 complex-like, mitochondrial [Gallus gallus]	513	84358	19	17	7	6	12.5	6.36	0.26	Quantitation summary for protein	129/126	1.101	17	1.038	*	130/126	1.217	17	[1.061]		131/126	1.338	17	1.039	*	129/127	1.002	17	1.03		130/127	1.13	17	1.072	*	131/127	1.229	17	1.05	*	129/128	0.868	17	1.044	*	130/128	0.973
704	gi|363736987	PREDICTED: calcium-binding protein 39 [Gallus gallus]	513	47607	29	26	11	11	27.9	6.43	1.23	Quantitation summary for protein	129/126	1.008	29	[1.034]		130/126	0.944	29	[1.074]		131/126	0.951	29	[1.063]		129/127	1.048	28	1.027	*	130/127	1.03	29	[1.080]		131/127	1.027	29	[1.059]		129/128	1.011	29	[1.034]		130/128	0.96
705	gi|53133287	hypothetical protein RCJMB04_15c3 [Gallus gallus]	512	28539	18	14	8	6	41.9	8.86	2.02	Quantitation summary for protein	129/126	0.762	16	1.109	*	130/126	0.918	17	1.078	*	131/126	0.866	17	[1.113]		129/127	0.871	16	1.065	*	130/127	1.071	17	[1.147]		131/127	1	17	1.091		129/128	1.116	16	1.077	*	130/128	1.363
706	gi|118083604	PREDICTED: 60S ribosomal protein L24 [Gallus gallus]	512	24311	23	17	5	4	24.2	11.26	1.46	Quantitation summary for protein	129/126	1.818	21	1.079	*	130/126	1.471	21	[1.074]		131/126	1.429	21	1.073	*	129/127	1.41	21	[1.079]		130/127	1.164	21	1.047	*	131/127	1.147	20	1.034	*	129/128	1.06	21	1.031	*	130/128	0.87
707	gi|63705	unnamed protein product [Gallus gallus]	511	41090	28	25	8	8	27.2	4.66	1.34	Quantitation summary for protein	129/126	1.672	26	1.058	*	130/126	1.266	27	1.049	*	131/126	1.482	27	1.054	*	129/127	1.061	27	[1.049]		130/127	0.822	27	1.047	*	131/127	0.952	27	1.023	*	129/128	1.154	27	1.028	*	130/128	0.889
708	gi|4514720	ezrin [Gallus gallus]	511	82271	55	41	11	10	13.8	5.9	0.87	Quantitation summary for protein	129/126	0.763	3	1.02	*	130/126	0.865	3	1.072		131/126	0.889	3	[1.082]		129/127	0.898	3	1.004	*	130/127	1.038	3	1.09		131/127	1.056	3	1.104		129/128	0.819	3	1.048	*	130/128	0.941
709	gi|211077	actinin [Gallus gallus]	509	116426	22	19	9	8	9.6	5.31	0.32	Quantitation summary for protein	129/126	---	1	---		130/126	---	1	---		131/126	---	1	---		129/127	---	1	---		130/127	---	1	---		131/127	---	1	---		129/128	---	1	---		130/128	---
710	gi|126659	RecName: Full=Protein MRP-126	509	16691	20	19	2	2	14.3	6.44	0.74	Quantitation summary for protein	129/126	4.715	20	[1.189]		130/126	1.555	20	1.112	*	131/126	3.576	20	[1.160]		129/127	4.999	20	1.127	*	130/127	1.67	19	1.046	*	131/127	3.829	20	1.097	*	129/128	4.376	20	1.104	*	130/128	1.464
711	gi|118101125	PREDICTED: aflatoxin B1 aldehyde reductase member 4 [Gallus gallus]	509	40839	26	19	9	9	30.1	6.76	1.18	Quantitation summary for protein	129/126	0.882	21	1.04	*	130/126	0.985	20	1.053		131/126	0.881	21	1.056	*	129/127	0.906	21	1.039	*	130/127	1.008	21	1.054		131/127	0.913	21	1.048	*	129/128	0.985	21	1.053		130/128	1.09
712	gi|127162	RecName: Full=Myosin regulatory light chain 2A, cardiac muscle isoform; Short=G2; Short=MLC-2A	508	22589	26	25	3	3	16.4	4.85	0.51	Quantitation summary for protein	129/126	0.818	6	1.044	*	130/126	1.051	6	1.05		131/126	0.481	6	1.064	*	129/127	2.245	6	1.077	*	130/127	2.946	6	1.09	*	131/127	1.334	6	1.055	*	129/128	0.342	6	1.066	*	130/128	0.446
713	gi|1362727	progesterone receptor-related protein p23 - chicken	508	21834	17	13	4	2	27.5	4.3	0.77	Quantitation summary for protein	129/126	0.921	14	1.04	*	130/126	0.9	14	[1.104]		131/126	0.876	14	1.078	*	129/127	1.021	14	1.04		130/127	1.019	14	1.107		131/127	0.981	14	1.073		129/128	1.011	14	[1.042]		130/128	1.002
714	gi|53134910	hypothetical protein RCJMB04_23p16 [Gallus gallus]	508	19136	24	20	9	9	48.5	5.58	4.97	Quantitation summary for protein	129/126	0.933	22	[1.097]		130/126	0.698	22	[1.264]		131/126	0.843	21	1.158	*	129/127	1.131	22	1.101	*	130/127	0.863	22	[1.267]		131/127	1.031	21	1.15		129/128	1.074	22	1.044	*	130/128	0.786
715	gi|363730012	PREDICTED: NADH dehydrogenase [ubiquinone] 1 alpha subcomplex subunit 4 [Gallus gallus]	507	11610	26	22	4	3	46.3	9.56	3.72	Quantitation summary for protein	129/126	0.919	23	1.027	*	130/126	0.937	23	1.049	*	131/126	0.963	23	1.031	*	129/127	0.846	23	1.025	*	130/127	0.88	23	1.063	*	131/127	0.895	23	1.041	*	129/128	0.78	23	1.028	*	130/128	0.807
716	gi|268370299	eukaryotic translation initiation factor 1 [Gallus gallus]	506	15819	15	14	5	4	39.8	6.82	1.63	Quantitation summary for protein	129/126	1.027	15	[1.053]		130/126	1.141	15	1.173	*	131/126	1.118	15	[1.119]		129/127	1.082	15	1.037	*	130/127	1.227	15	1.188	*	131/127	1.189	15	[1.139]		129/128	0.956	14	1.038	*	130/128	1.084
717	gi|63634	unnamed protein product [Gallus gallus]	506	277045	30	22	8	7	4.3	5.5	0.11	Quantitation summary for protein	129/126	---	1	---		130/126	---	1	---		131/126	---	1	---		129/127	---	1	---		130/127	---	1	---		131/127	---	1	---		129/128	---	1	---		130/128	---
718	gi|53127408	hypothetical protein RCJMB04_2d7 [Gallus gallus]	505	91770	24	17	9	5	14.1	6.64	0.37	Quantitation summary for protein	129/126	1.018	19	1.047		130/126	1.096	20	1.068	*	131/126	1.052	20	1.069	*	129/127	0.877	20	[1.049]		130/127	0.969	20	1.069	*	131/127	0.926	19	1.055	*	129/128	1.082	20	1.074	*	130/128	1.188
719	gi|14579553	AG9C5 [Gallus gallus]	504	76934	35	22	9	7	13.8	4.98	0.46	Quantitation summary for protein	129/126	1.307	23	1.046	*	130/126	1.347	23	[1.050]		131/126	0.995	23	[1.052]		129/127	0.853	23	[1.025]		130/127	0.933	22	1.036	*	131/127	0.655	23	[1.054]		129/128	1.013	23	1.021	*	130/128	1.058
720	gi|211985	immunoglobulin heavy chain V-region, partial [Gallus gallus]	504	12622	16	13	3	3	36.6	8.67	2.31	Quantitation summary for protein	129/126	---	0	---		130/126	---	0	---		131/126	---	0	---		129/127	---	0	---		130/127	---	0	---		131/127	---	0	---		129/128	---	0	---		130/128	---
721	gi|363740157	PREDICTED: translational activator GCN1 [Gallus gallus]	504	344739	22	18	16	14	7.8	7.38	0.16	Quantitation summary for protein	129/126	1.118	18	1.059	*	130/126	1.133	18	1.052	*	131/126	1.056	19	[1.054]		129/127	0.945	18	1.039	*	130/127	0.974	19	1.089		131/127	0.902	18	1.052	*	129/128	1.089	18	1.041	*	130/128	1.117
722	gi|363746971	PREDICTED: nuclear calmodulin-binding protein, partial [Gallus gallus]	503	19291	22	21	5	4	28.5	9.19	1.23	Quantitation summary for protein	129/126	---	1	---		130/126	---	1	---		131/126	---	1	---		129/127	---	1	---		130/127	---	1	---		131/127	---	1	---		129/128	---	1	---		130/128	---
723	gi|33355442	protein phospatase 3 regulatory subunit B alpha isoform type 1 [Gallus gallus]	503	23068	23	17	6	6	41.2	4.64	1.96	Quantitation summary for protein	129/126	0.89	22	[1.060]		130/126	0.722	22	1.158	*	131/126	0.873	22	1.103	*	129/127	0.92	22	1.051	*	130/127	0.762	22	1.141	*	131/127	0.912	22	1.083	*	129/128	0.93	22	1.048	*	130/128	0.766
724	gi|60098551	hypothetical protein RCJMB04_3l6 [Gallus gallus]	502	75577	24	24	7	7	11.5	5.93	0.35	Quantitation summary for protein	129/126	1.176	24	1.024	*	130/126	1.079	24	1.023	*	131/126	0.922	24	1.023	*	129/127	0.926	24	[1.027]		130/127	0.868	24	[1.037]		131/127	0.734	24	1.021	*	129/128	1.125	24	[1.025]		130/128	1.047
725	gi|118094665	PREDICTED: uncharacterized protein LOC772239 [Gallus gallus]	499	10262	17	16	2	2	38.4	9.34	2.22	Quantitation summary for protein	129/126	0.963	16	1.036	*	130/126	0.756	17	1.051	*	131/126	0.806	17	1.047	*	129/127	1.161	17	1.027	*	130/127	0.924	17	1.04	*	131/127	0.975	17	1.049	*	129/128	1.409	17	1.038	*	130/128	1.115
726	gi|53128246	hypothetical protein RCJMB04_4k19 [Gallus gallus]	498	81447	22	18	9	8	19.6	5.16	0.43	Quantitation summary for protein	129/126	1.3	18	1.051	*	130/126	0.808	18	1.075	*	131/126	1.211	18	[1.048]		129/127	1.497	18	1.053	*	130/127	0.949	18	1.07	*	131/127	1.408	18	[1.044]		129/128	1.324	17	1.027	*	130/128	0.829
727	gi|50764028	PREDICTED: aldo-keto reductase family 1 member B10 [Gallus gallus]	498	42291	39	27	7	7	21.8	6.8	1.29	Quantitation summary for protein	129/126	1.821	3	1.038	*	130/126	0.431	3	1.136	*	131/126	0.498	3	1.146	*	129/127	2.839	3	1.093	*	130/127	0.685	3	1.114	*	131/127	0.784	3	1.071	*	129/128	0.746	3	1.026	*	130/128	0.179
728	gi|53127288	hypothetical protein RCJMB04_1k21 [Gallus gallus]	498	37934	18	17	4	3	17.1	9.32	0.52	Quantitation summary for protein	129/126	1.08	17	1.041	*	130/126	0.913	17	1.069	*	131/126	0.93	17	[1.055]		129/127	0.897	17	1.034	*	130/127	0.774	17	1.098	*	131/127	0.78	17	1.073	*	129/128	0.789	17	1.047	*	130/128	0.677
729	gi|363731161	PREDICTED: protein FAM49B-like [Gallus gallus]	498	42080	24	16	7	4	21.9	5.76	0.7	Quantitation summary for protein	129/126	0.947	16	1.055	*	130/126	0.716	16	1.063	*	131/126	0.744	16	1.063	*	129/127	1.134	16	1.054	*	130/127	0.876	16	1.072	*	131/127	0.9	16	1.054	*	129/128	1.215	16	1.065	*	130/128	0.933
730	gi|53130169	hypothetical protein RCJMB04_6i8 [Gallus gallus]	498	45641	19	16	8	7	25.9	6.03	0.75	Quantitation summary for protein	129/126	1.313	17	1.026	*	130/126	1.202	17	1.055	*	131/126	1.039	17	1.038	*	129/127	0.847	17	[1.028]		130/127	0.791	17	1.06	*	131/127	0.677	17	1.038	*	129/128	1.009	17	[1.030]		130/128	0.937
731	gi|28192575	voltage-gated Ca2+-channel beta 4a subunit [Gallus gallus]	497	50449	36	24	7	4	12.5	6.81	0.46	Quantitation summary for protein	129/126	0.979	4	1.082		130/126	0.844	4	1.172		131/126	0.806	3	1.055	*	129/127	1.059	4	1.023	*	130/127	0.931	4	[1.117]		131/127	0.978	4	1.074		129/128	0.921	4	1.061		130/128	0.698
732	gi|15341202	filamin [Gallus gallus]	497	303590	19	19	9	9	3.3	5.94	0.11	Quantitation summary for protein	129/126	1.28	8	1.096	*	130/126	1.168	8	1.06	*	131/126	1.118	8	1.095	*	129/127	0.668	8	[1.088]		130/127	0.622	8	1.057	*	131/127	0.589	8	1.127	*	129/128	0.956	8	1.048	*	130/128	0.885
733	gi|118095339	PREDICTED: elongation factor G, mitochondrial [Gallus gallus]	495	93352	27	25	9	8	12.9	6.76	0.32	Quantitation summary for protein	129/126	1.119	26	[1.063]		130/126	1.151	25	1.037	*	131/126	1.198	26	1.051	*	129/127	0.969	26	[1.070]		130/127	1.011	26	1.055		131/127	1.048	26	1.05	*	129/128	0.949	26	1.036	*	130/128	0.983
734	gi|363739065	PREDICTED: methionine adenosyltransferase 2 subunit beta [Gallus gallus]	495	39964	26	23	7	6	26.8	6.27	0.89	Quantitation summary for protein	129/126	0.919	26	1.06	*	130/126	1.003	26	[1.129]		131/126	1.016	26	1.058		129/127	0.969	26	[1.049]		130/127	1.08	26	[1.150]		131/127	1.082	26	1.08	*	129/128	1.034	26	[1.063]		130/128	1.145
735	gi|53136806	hypothetical protein RCJMB04_34c21 [Gallus gallus]	494	64847	14	14	7	7	16.7	5.02	0.49	Quantitation summary for protein	129/126	1.012	14	1.038		130/126	1.013	14	1.047		131/126	1.201	14	1.045	*	129/127	0.981	14	1.032	*	130/127	1.002	14	1.041		131/127	1.175	14	1.037	*	129/128	0.977	14	1.034	*	130/128	0.992
736	gi|118104440	PREDICTED: proteasome-associated protein ECM29 homolog [Gallus gallus]	494	235170	22	20	11	11	8.2	6.98	0.16	Quantitation summary for protein	129/126	1.101	22	[1.069]		130/126	0.935	22	1.08	*	131/126	0.853	22	1.065	*	129/127	1.041	22	1.037	*	130/127	0.902	22	1.089	*	131/127	0.814	22	1.072	*	129/128	1.118	22	1.04	*	130/128	0.963
737	gi|363731156	PREDICTED: NADH dehydrogenase [ubiquinone] 1 beta subcomplex subunit 9 [Gallus gallus]	491	25324	27	25	3	3	16.7	8.71	0.45	Quantitation summary for protein	129/126	0.854	25	1.026	*	130/126	0.965	24	1.025	*	131/126	0.946	25	1.02	*	129/127	0.937	24	1.023	*	130/127	1.055	25	1.037	*	131/127	1.032	25	1.032	*	129/128	0.869	25	1.022	*	130/128	0.988
738	gi|363729678	PREDICTED: voltage-dependent L-type calcium channel subunit beta-2 [Gallus gallus]	490	84547	26	23	4	3	5.4	8.31	0.16	Quantitation summary for protein	129/126	---	0	---		130/126	---	0	---		131/126	---	0	---		129/127	---	0	---		130/127	---	0	---		131/127	---	0	---		129/128	---	0	---		130/128	---
739	gi|973977	calcium-binding protein [Gallus gallus]	489	23675	12	12	2	2	11.1	9.23	0.3	Quantitation summary for protein	129/126	1.613	12	1.096	*	130/126	1.224	12	[1.092]		131/126	1.581	12	1.083	*	129/127	1.095	12	1.015	*	130/127	0.848	12	1.034	*	131/127	1.084	12	1.036	*	129/128	1.124	12	1.033	*	130/128	0.865
740	gi|57240089	vimentin, partial [Gallus gallus]	489	20443	28	24	10	9	54	8.49	6.25	Quantitation summary for protein	129/126	---	1	---		130/126	---	1	---		131/126	---	1	---		129/127	---	1	---		130/127	---	1	---		131/127	---	1	---		129/128	---	1	---		130/128	---
741	gi|115592	RecName: Full=F-actin-capping protein subunit alpha-1; AltName: Full=Beta-actinin subunit I; AltName: Full=CapZ 36/32	488	37923	28	17	8	6	38.8	5.43	1.12	Quantitation summary for protein	129/126	1.094	11	1.066	*	130/126	1.049	11	[1.103]		131/126	1.147	11	[1.127]		129/127	1.349	11	1.031	*	130/127	1.321	11	1.134	*	131/127	1.429	11	[1.137]		129/128	1.252	11	1.053	*	130/128	1.218
742	gi|3822553	nuclear calmodulin-binding protein [Gallus gallus]	487	92031	25	22	6	5	5.7	4.68	0.23	Quantitation summary for protein	129/126	1.381	3	1.064	*	130/126	1.054	3	1.102		131/126	1.196	3	1.116		129/127	1.245	3	1.039	*	130/127	0.97	3	1.102		131/127	1.089	3	1.08		129/128	1.351	3	1.041	*	130/128	1.047
743	gi|363733756	PREDICTED: LIM and calponin homology domains-containing protein 1 [Gallus gallus]	486	142206	13	11	7	5	8	6.7	0.15	Quantitation summary for protein	129/126	0.998	12	1.041		130/126	0.988	12	1.037		131/126	1.16	12	1.041	*	129/127	0.822	12	1.056	*	130/127	0.831	12	1.051	*	131/127	0.965	12	1.042	*	129/128	0.927	12	1.019	*	130/128	0.931
744	gi|53136866	hypothetical protein RCJMB04_35d23 [Gallus gallus]	486	29529	36	17	8	5	30.5	5.57	1.11	Quantitation summary for protein	129/126	1.225	20	1.044	*	130/126	0.688	20	1.101	*	131/126	0.716	20	1.077	*	129/127	1.425	20	[1.073]		130/127	0.817	20	1.068	*	131/127	0.841	20	1.059	*	129/128	0.859	20	1.026	*	130/128	0.49
745	gi|50729254	PREDICTED: 2-amino-3-ketobutyrate coenzyme A ligase, mitochondrial [Gallus gallus]	485	50266	24	21	6	6	18.6	8.51	0.77	Quantitation summary for protein	129/126	0.904	22	1.073	*	130/126	0.923	22	1.06	*	131/126	1.133	22	1.033	*	129/127	1.042	22	1.057	*	130/127	1.046	21	1.052	*	131/127	1.287	20	1.043	*	129/128	1.215	22	[1.058]		130/128	1.26
746	gi|2623879	heat shock protein 10 [Gallus gallus]	484	13883	37	20	8	6	70.6	8.68	8.01	Quantitation summary for protein	129/126	1.34	28	1.088	*	130/126	1.005	28	[1.076]		131/126	1.079	28	[1.069]		129/127	1.298	28	[1.072]		130/127	0.938	27	1.069	*	131/127	1.055	28	1.077	*	129/128	0.86	28	1.057	*	130/128	0.654
747	gi|211780	fibrinogen beta chain, partial [Gallus gallus]	484	62209	13	13	3	3	7.6	7.18	0.17	Quantitation summary for protein	129/126	1.738	13	1.074	*	130/126	1.002	13	[1.091]		131/126	1.083	13	1.051	*	129/127	1.186	12	1.029	*	130/127	0.712	13	1.091	*	131/127	0.761	13	1.044	*	129/128	1.055	13	[1.047]		130/128	0.617
748	gi|53133117	hypothetical protein RCJMB04_14i9 [Gallus gallus]	484	30039	22	20	9	8	38.6	4.76	1.85	Quantitation summary for protein	129/126	1.038	20	[1.063]		130/126	0.968	19	1.08		131/126	1.048	20	1.06	*	129/127	1.041	19	1.03	*	130/127	0.969	20	1.084		131/127	1.059	20	1.063	*	129/128	0.923	20	1.046	*	130/128	0.855
749	gi|363731587	PREDICTED: heterogeneous nuclear ribonucleoprotein U [Gallus gallus]	483	88996	31	18	11	6	14.1	9.43	0.38	Quantitation summary for protein	129/126	1.674	22	1.043	*	130/126	1.478	22	1.045	*	131/126	1.73	22	1.04	*	129/127	1.133	22	1.034	*	130/127	1.02	22	[1.058]		131/127	1.182	22	[1.048]		129/128	1.2	22	1.036	*	130/128	1.074
750	gi|53135337	hypothetical protein RCJMB04_24o2 [Gallus gallus]	483	53436	23	19	6	5	16.2	5.61	0.52	Quantitation summary for protein	129/126	0.999	21	1.028		130/126	0.771	21	1.108	*	131/126	0.987	21	1.053		129/127	0.897	21	1.022	*	130/127	0.707	21	1.118	*	131/127	0.896	21	1.063	*	129/128	1.032	21	1.035	*	130/128	0.808
751	gi|60098595	hypothetical protein RCJMB04_3o14 [Gallus gallus]	482	68350	15	11	7	5	14.3	5.07	0.39	Quantitation summary for protein	129/126	1.139	14	1.048	*	130/126	1.039	14	1.055	*	131/126	1.169	14	1.044	*	129/127	1.022	14	1.026	*	130/127	0.952	14	1.084	*	131/127	1.059	14	1.068	*	129/128	1.078	14	1.028	*	130/128	0.998
752	gi|363730964	PREDICTED: aspartyl/asparaginyl beta-hydroxylase [Gallus gallus]	482	99491	22	20	7	7	14.5	4.78	0.25	Quantitation summary for protein	129/126	1.274	21	1.041	*	130/126	1.087	21	[1.091]		131/126	1.227	21	1.082	*	129/127	1.285	19	1.044	*	130/127	1.136	21	[1.067]		131/127	1.269	21	1.047	*	129/128	1.055	20	1.029	*	130/128	0.865
753	gi|363745834	PREDICTED: tubulin alpha-1A chain-like [Gallus gallus]	481	9496	29	23	4	3	44	4.13	15.4	Quantitation summary for protein	129/126	1.292	4	1.2		130/126	1.015	4	1.114		131/126	1.017	4	[1.123]		129/127	1.104	3	1.025	*	130/127	0.866	4	1.182		131/127	0.859	4	1.103		129/128	1.23	4	1.152		130/128	0.98
754	gi|50760188	PREDICTED: glucose-6-phosphate translocase isoform 2 [Gallus gallus]	480	53253	14	13	4	3	9.8	9.11	0.27	Quantitation summary for protein	129/126	1.051	14	1.026	*	130/126	0.567	14	1.089	*	131/126	0.627	14	1.081	*	129/127	1.26	14	1.06	*	130/127	0.694	14	1.064	*	131/127	0.759	14	1.054	*	129/128	1.075	14	1.017	*	130/128	0.589
755	gi|196049781	Chain G, Chicken Cytochrome Bc1 Complex Inhibited By An Iodinated Analogue Of The Polyketide Crocacin-d	479	10398	35	32	4	4	50.6	9.6	12.17	Quantitation summary for protein	129/126	0.868	33	1.07	*	130/126	1.049	32	1.117	*	131/126	0.969	32	1.091		129/127	0.842	33	[1.078]		130/127	1.035	33	1.158		131/127	0.951	33	1.086	*	129/128	0.705	33	1.072	*	130/128	0.862
756	gi|60099199	hypothetical protein RCJMB04_34d13 [Gallus gallus]	478	158623	24	19	13	10	9.6	7.53	0.25	Quantitation summary for protein	129/126	1.294	22	1.033	*	130/126	1.082	22	[1.049]		131/126	1.096	22	1.036	*	129/127	0.895	22	1.036	*	130/127	0.764	22	[1.069]		131/127	0.765	22	1.05	*	129/128	1.078	21	1.026	*	130/128	0.916
757	gi|256419027	eukaryotic translation initiation factor 3 subunit I [Gallus gallus]	477	40991	31	29	8	8	23.7	5.38	0.86	Quantitation summary for protein	129/126	1.164	29	[1.064]		130/126	1.089	29	[1.055]		131/126	1.104	29	[1.049]		129/127	0.918	29	[1.085]		130/127	0.876	29	1.059	*	131/127	0.877	28	1.041	*	129/128	0.881	29	1.045	*	130/128	0.835
758	gi|1142718	Cu/Zn superoxide dismutase [Gallus gallus]	477	18500	35	22	7	5	31.8	6.1	6.43	Quantitation summary for protein	129/126	1.007	30	[1.101]		130/126	1.053	30	1.097	*	131/126	1.068	30	1.097	*	129/127	1.102	30	[1.075]		130/127	1.176	30	[1.119]		131/127	1.18	30	[1.108]		129/128	1.097	30	[1.073]		130/128	1.164
759	gi|363746871	PREDICTED: 3-hydroxyacyl-CoA dehydrogenase type-2-like [Gallus gallus]	477	13862	33	26	5	5	46	6.71	3.66	Quantitation summary for protein	129/126	1.055	10	1.051	*	130/126	1.068	10	1.036	*	131/126	1.079	10	1.021	*	129/127	0.977	10	[1.084]		130/127	1.009	10	[1.074]		131/127	1.009	10	[1.052]		129/128	0.891	10	[1.093]		130/128	0.915
760	gi|289797	YB-1 protein [Gallus gallus]	475	39673	25	21	8	6	24.3	9.85	0.75	Quantitation summary for protein	129/126	1.185	19	1.075	*	130/126	1.369	19	[1.130]		131/126	1.392	19	1.09	*	129/127	0.963	20	1.089		130/127	1.136	20	[1.184]		131/127	1.143	20	1.125	*	129/128	0.999	20	[1.088]		130/128	1.171
761	gi|53129777	hypothetical protein RCJMB04_6c13 [Gallus gallus]	475	25267	25	22	7	7	38.7	4.95	1.7	Quantitation summary for protein	129/126	0.994	22	1.037		130/126	0.691	22	1.175	*	131/126	0.708	22	1.103	*	129/127	1.219	22	1.036	*	130/127	0.865	22	[1.181]		131/127	0.877	22	1.111	*	129/128	1.042	22	1.047	*	130/128	0.735
762	gi|50755579	PREDICTED: dehydrogenase/reductase SDR family member 7B [Gallus gallus]	475	39759	26	21	12	10	38.5	9.58	1.83	Quantitation summary for protein	129/126	1.008	23	1.068		130/126	1.084	23	1.084	*	131/126	0.984	23	1.069		129/127	0.958	23	[1.053]		130/127	1.052	23	1.113	*	131/127	0.945	23	1.09	*	129/128	1.176	23	1.065	*	130/128	1.276
763	gi|53136740	hypothetical protein RCJMB04_33d2 [Gallus gallus]	475	68832	21	18	4	4	7.1	6.25	0.32	Quantitation summary for protein	129/126	---	1	---		130/126	---	1	---		131/126	---	1	---		129/127	---	1	---		130/127	---	1	---		131/127	---	1	---		129/128	---	1	---		130/128	---
764	gi|212449	nonmuscle myosin heavy chain [Gallus gallus]	474	275470	28	21	14	13	8.9	5.42	0.18	Quantitation summary for protein	129/126	1.042	9	1.095		130/126	0.996	9	1.085		131/126	1.055	9	[1.077]		129/127	0.907	9	[1.136]		130/127	0.885	9	1.105	*	131/127	0.928	9	1.087	*	129/128	1.02	9	1.088		130/128	0.989
765	gi|50751398	PREDICTED: cAMP-dependent protein kinase catalytic subunit beta [Gallus gallus]	473	54263	18	16	6	5	15.3	8.55	0.51	Quantitation summary for protein	129/126	0.985	16	1.03		130/126	0.958	16	[1.071]		131/126	0.937	16	1.037	*	129/127	1.122	16	1.037	*	130/127	1.126	15	1.056	*	131/127	1.078	16	1.039	*	129/128	1.191	16	1.031	*	130/128	1.175
766	gi|211969	immunoglobulin heavy chain V-region, partial [Gallus gallus]	473	13079	15	12	3	3	35.7	7.88	2.19	Quantitation summary for protein	129/126	---	0	---		130/126	---	0	---		131/126	---	0	---		129/127	---	0	---		130/127	---	0	---		131/127	---	0	---		129/128	---	0	---		130/128	---
767	gi|50757498	PREDICTED: 60S ribosomal protein L12 [Gallus gallus]	471	21564	33	15	6	4	38.8	9.48	1.38	Quantitation summary for protein	129/126	2.123	26	[1.152]		130/126	1.145	26	1.114	*	131/126	1.218	26	[1.108]		129/127	1.177	26	1.113	*	130/127	0.648	26	1.183	*	131/127	0.682	26	1.183	*	129/128	0.868	26	1.073	*	130/128	0.475
768	gi|53126839	hypothetical protein RCJMB04_1g23 [Gallus gallus]	471	63264	17	14	8	6	23	5.43	0.43	Quantitation summary for protein	129/126	1.066	14	1.037	*	130/126	1.053	14	1.033	*	131/126	1.05	14	1.029	*	129/127	0.955	14	1.043	*	130/127	0.963	14	1.056	*	131/127	0.95	14	1.037	*	129/128	1.046	14	1.033	*	130/128	1.049
769	gi|608483	kinectin [Gallus gallus]	469	196440	71	27	27	17	17.4	5.72	0.44	Quantitation summary for protein	129/126	1.276	32	[1.054]		130/126	1.106	32	1.052	*	131/126	1.144	32	[1.048]		129/127	1.009	32	[1.054]		130/127	0.893	32	1.068	*	131/127	0.914	32	1.058	*	129/128	0.906	32	1.034	*	130/128	0.797
770	gi|363737486	PREDICTED: cytochrome c oxidase subunit 5A, mitochondrial isoform 2 [Gallus gallus]	464	17841	35	27	8	8	38.5	6.3	5.71	Quantitation summary for protein	129/126	0.87	29	[1.129]		130/126	1.283	28	1.223	*	131/126	1.299	29	1.173	*	129/127	0.904	29	1.107	*	130/127	1.36	28	[1.187]		131/127	1.364	29	[1.151]		129/128	0.909	29	1.053	*	130/128	1.364
771	gi|118088308	PREDICTED: plasminogen [Gallus gallus]	463	106046	29	28	10	9	10.6	7.92	0.36	Quantitation summary for protein	129/126	1.816	29	1.049	*	130/126	1.282	29	1.029	*	131/126	1.88	29	1.036	*	129/127	1.604	29	1.037	*	130/127	1.155	29	[1.036]		131/127	1.676	29	[1.036]		129/128	1.466	29	[1.037]		130/128	1.05
772	gi|212485	ovoinhibitor [Gallus gallus]	463	60582	31	26	9	9	15	6.16	0.89	Quantitation summary for protein	129/126	1.843	28	1.051	*	130/126	1.343	30	1.077	*	131/126	2.396	30	[1.087]		129/127	2.055	30	[1.092]		130/127	1.515	30	1.083	*	131/127	2.675	30	1.082	*	129/128	2.23	29	1.048	*	130/128	1.622
773	gi|118104378	PREDICTED: cytochrome c oxidase subunit 7C, mitochondrial-like [Gallus gallus]	461	8404	28	24	2	2	28.6	10.96	1.84	Quantitation summary for protein	129/126	0.852	28	1.047	*	130/126	0.989	28	1.085		131/126	0.968	28	[1.050]		129/127	0.932	28	[1.029]		130/127	1.104	28	1.077	*	131/127	1.069	28	1.04	*	129/128	0.95	28	1.032	*	130/128	1.119
774	gi|60098409	hypothetical protein RCJMB04_1m16 [Gallus gallus]	461	133882	22	19	11	11	14.3	7.85	0.37	Quantitation summary for protein	129/126	1.105	20	1.047	*	130/126	1.143	20	1.069	*	131/126	1.051	20	1.048	*	129/127	0.892	20	[1.052]		130/127	0.942	20	1.083	*	131/127	0.856	20	[1.057]		129/128	0.957	20	[1.059]		130/128	1.004
775	gi|257216574	ADF actin binding protein [Gallus gallus]	461	19877	25	24	5	4	30.3	5.33	1.56	Quantitation summary for protein	129/126	1.153	24	[1.074]		130/126	0.78	24	1.106	*	131/126	0.966	24	[1.096]		129/127	1.114	24	1.026	*	130/127	0.769	24	[1.101]		131/127	0.942	24	[1.063]		129/128	1.043	24	[1.029]		130/128	0.716
776	gi|53130604	hypothetical protein RCJMB04_8o19 [Gallus gallus]	459	25639	15	14	5	4	32.1	4.8	0.63	Quantitation summary for protein	129/126	0.897	14	1.023	*	130/126	0.828	14	1.026	*	131/126	0.798	14	[1.031]		129/127	1.093	14	1.024	*	130/127	1.03	14	1.027	*	131/127	0.983	14	1.032		129/128	0.92	14	1.031	*	130/128	0.861
777	gi|50760631	PREDICTED: glycylpeptide N-tetradecanoyltransferase 1 [Gallus gallus]	457	67255	34	31	10	10	23.6	8.72	0.77	Quantitation summary for protein	129/126	1.417	19	1.066	*	130/126	1.043	19	1.059	*	131/126	1.072	19	1.044	*	129/127	1.246	19	1.061	*	130/127	0.936	19	1.077	*	131/127	0.952	19	1.055	*	129/128	1.076	19	1.036	*	130/128	0.803
778	gi|53130450	hypothetical protein RCJMB04_7p6 [Gallus gallus]	456	43217	26	21	8	6	21.4	6.12	0.8	Quantitation summary for protein	129/126	1.269	9	1.04	*	130/126	0.734	9	1.069	*	131/126	0.846	9	1.056	*	129/127	0.939	9	1.025	*	130/127	0.554	9	[1.075]		131/127	0.632	9	1.072	*	129/128	0.837	9	1.025	*	130/128	0.491
779	gi|60098817	hypothetical protein RCJMB04_11a3 [Gallus gallus]	456	72974	20	16	6	5	10.8	4.98	0.3	Quantitation summary for protein	129/126	0.798	17	1.063	*	130/126	0.837	17	1.043	*	131/126	0.807	17	1.086	*	129/127	1.012	17	1.053		130/127	1.083	17	1.052	*	131/127	1.034	17	1.08		129/128	0.962	17	1.042	*	130/128	1.023
780	gi|363741770	PREDICTED: junctophilin-2 [Gallus gallus]	456	57300	19	17	8	7	16.6	9.22	0.56	Quantitation summary for protein	129/126	1.104	16	1.067	*	130/126	1.285	16	1.081	*	131/126	1.029	15	1.064		129/127	1.214	16	1.072	*	130/127	1.443	16	1.111	*	131/127	1.079	14	1.085	*	129/128	0.916	16	1.072	*	130/128	1.082
781	gi|53133724	hypothetical protein RCJMB04_19l6 [Gallus gallus]	456	38917	16	12	6	5	27.5	5.04	0.77	Quantitation summary for protein	129/126	0.971	14	1.033	*	130/126	1.012	15	1.102		131/126	0.89	15	1.056	*	129/127	0.906	15	1.036	*	130/127	0.955	15	1.122		131/127	0.831	15	1.066	*	129/128	0.954	15	1.047	*	130/128	0.998
782	gi|363738072	PREDICTED: probable D-lactate dehydrogenase, mitochondrial-like, partial [Gallus gallus]	454	50042	17	17	3	3	8.2	5.94	0.21	Quantitation summary for protein	129/126	1.126	17	1.041	*	130/126	0.882	17	1.063	*	131/126	1.003	17	1.055		129/127	1.065	17	1.028	*	130/127	0.852	17	1.056	*	131/127	0.958	17	1.042	*	129/128	0.97	17	1.04	*	130/128	0.771
783	gi|50754507	PREDICTED: 26S proteasome non-ATPase regulatory subunit 6 [Gallus gallus]	454	52021	35	27	11	8	24.9	5.87	0.85	Quantitation summary for protein	129/126	1.104	30	1.046	*	130/126	0.92	30	[1.043]		131/126	0.893	30	1.042	*	129/127	1.137	30	1.024	*	130/127	0.967	30	[1.048]		131/127	0.929	30	1.032	*	129/128	1.126	30	1.027	*	130/128	0.951
784	gi|132626770	heterogeneous nuclear ribonucleoprotein R [Gallus gallus]	452	81574	22	19	9	7	14.1	8.4	0.32	Quantitation summary for protein	129/126	1.6	12	[1.086]		130/126	1.224	12	[1.092]		131/126	1.556	12	1.057	*	129/127	1.176	12	[1.064]		130/127	0.918	12	[1.099]		131/127	1.155	12	1.065	*	129/128	1.269	12	1.081	*	130/128	0.985
785	gi|53136696	hypothetical protein RCJMB04_32j5 [Gallus gallus]	451	37357	21	19	9	8	29.4	4.73	1.15	Quantitation summary for protein	129/126	0.903	13	1.077	*	130/126	0.812	13	1.127	*	131/126	0.873	14	1.047	*	129/127	0.93	14	[1.091]		130/127	0.85	13	1.145	*	131/127	0.915	14	1.11	*	129/128	0.853	15	1.068	*	130/128	0.778
786	gi|790617	A1 isoform of vacuolar H+-ATPase subunit A [Gallus gallus]	451	76796	26	23	10	8	15.7	5.51	0.52	Quantitation summary for protein	129/126	1.048	25	[1.027]		130/126	0.832	25	1.039	*	131/126	0.975	25	1.027	*	129/127	1.098	25	[1.027]		130/127	0.89	25	[1.057]		131/127	1.032	25	[1.043]		129/128	1.096	25	[1.020]		130/128	0.883
787	gi|294861490	fascin 1 [Gallus gallus]	449	62384	27	25	8	8	18	6.8	0.59	Quantitation summary for protein	129/126	1.1	27	[1.053]		130/126	0.861	27	1.043	*	131/126	0.951	27	[1.058]		129/127	0.91	27	[1.030]		130/127	0.727	27	[1.071]		131/127	0.795	27	1.045	*	129/128	0.988	27	1.032		130/128	0.785
788	gi|53130282	hypothetical protein RCJMB04_6l21 [Gallus gallus]	449	44256	23	20	8	6	30.2	6.1	0.78	Quantitation summary for protein	129/126	0.869	22	[1.032]		130/126	0.828	22	1.038	*	131/126	0.747	22	[1.057]		129/127	0.892	22	[1.035]		130/127	0.868	22	1.039	*	131/127	0.774	22	1.051	*	129/128	0.937	22	1.026	*	130/128	0.906
789	gi|2842685	RecName: Full=Myotrophin; AltName: Full=Granule cell differentiation protein; AltName: Full=Protein V-1	447	15971	18	18	4	4	34.7	5.11	1.16	Quantitation summary for protein	129/126	1.132	18	1.062	*	130/126	0.493	18	[1.111]		131/126	0.488	18	1.092	*	129/127	1.454	18	[1.068]		130/127	0.647	18	[1.131]		131/127	0.634	18	[1.101]		129/128	1.357	18	1.03	*	130/128	0.6
790	gi|50755009	PREDICTED: protein FAM114A2 [Gallus gallus]	447	62757	11	11	5	5	13.8	4.62	0.43	Quantitation summary for protein	129/126	0.988	11	1.106		130/126	0.911	11	[1.117]		131/126	0.888	11	1.101	*	129/127	0.922	11	1.06	*	130/127	0.868	11	[1.148]		131/127	0.837	11	1.138	*	129/128	0.966	10	1.044	*	130/128	0.91
791	gi|50749392	PREDICTED: protein transport protein Sec24C [Gallus gallus]	446	135933	18	16	6	5	6.2	6.39	0.15	Quantitation summary for protein	129/126	0.964	16	1.032	*	130/126	0.854	16	1.078	*	131/126	0.949	17	[1.077]		129/127	0.946	17	[1.048]		130/127	0.839	17	[1.106]		131/127	0.925	17	1.048	*	129/128	1.034	17	1.06	*	130/128	0.911
792	gi|302488427	Sjogren syndrome antigen B (autoantigen La) isoform 1 [Gallus gallus]	444	61025	31	23	10	9	24.8	8.05	0.69	Quantitation summary for protein	129/126	1.248	27	1.054	*	130/126	0.948	27	[1.116]		131/126	0.978	27	1.052	*	129/127	1.061	27	1.048	*	130/127	0.823	27	[1.130]		131/127	0.84	27	1.058	*	129/128	0.979	27	1.035	*	130/128	0.755
793	gi|84105269	eukaryotic translation initiation factor 5B [Gallus gallus]	444	179778	25	18	13	10	10.8	5.41	0.22	Quantitation summary for protein	129/126	0.947	20	[1.064]		130/126	0.78	20	1.093	*	131/126	1.043	19	1.042	*	129/127	1.219	20	1.1	*	130/127	1.024	20	1.08		131/127	1.206	20	1.076	*	129/128	0.803	19	1.041	*	130/128	0.615
794	gi|134260594	myosin light chain 2 [Gallus gallus]	444	22959	26	20	4	3	24.2	4.83	0.72	Quantitation summary for protein	129/126	0.97	3	1.124		130/126	4.758	3	1.062	*	131/126	0.871	3	1.055	*	129/127	1.251	3	1.079	*	130/127	6.263	3	1.084	*	131/127	1.134	3	1.021	*	129/128	0.516	3	[1.194]		130/128	2.57
795	gi|363746305	PREDICTED: NEDD8-like [Gallus gallus]	443	7696	35	22	4	4	58	6.23	5.66	Quantitation summary for protein	129/126	0.992	32	1.081		130/126	1.358	32	[1.161]		131/126	1.143	32	[1.103]		129/127	0.974	32	[1.096]		130/127	1.362	32	[1.197]		131/127	1.134	32	[1.134]		129/128	0.932	32	1.041	*	130/128	1.295
796	gi|53126617	hypothetical protein RCJMB04_1f8 [Gallus gallus]	443	60093	29	17	9	8	21.2	8.54	0.8	Quantitation summary for protein	129/126	1.532	24	[1.049]		130/126	1.095	24	1.034	*	131/126	1.223	23	1.032	*	129/127	1.632	23	1.03	*	130/127	1.184	24	1.035	*	131/127	1.3	24	1.026	*	129/128	0.951	23	1.027	*	130/128	0.695
797	gi|47678122	small heat shock protein B2 [Gallus gallus]	442	21666	12	11	3	3	22.5	5.8	0.54	Quantitation summary for protein	129/126	0.953	11	1.025	*	130/126	0.954	12	1.037	*	131/126	0.954	12	1.029	*	129/127	1.155	12	1.039	*	130/127	1.171	12	1.027	*	131/127	1.158	12	1.021	*	129/128	1.226	12	[1.039]		130/128	1.236
798	gi|118092977	PREDICTED: xaa-Pro aminopeptidase 1 [Gallus gallus]	442	79077	30	23	10	8	18.9	5.79	0.56	Quantitation summary for protein	129/126	0.933	25	[1.073]		130/126	0.859	25	1.071	*	131/126	0.967	25	[1.075]		129/127	1.005	25	[1.080]		130/127	0.945	25	1.086	*	131/127	1.052	25	[1.081]		129/128	1.05	25	1.06	*	130/128	0.981
799	gi|363744458	PREDICTED: UPF0553 protein C9orf64 isoform 1 [Gallus gallus]	442	44993	20	14	8	7	24.3	5.82	0.76	Quantitation summary for protein	129/126	1.122	16	1.025	*	130/126	0.981	17	[1.132]		131/126	0.877	17	1.045	*	129/127	1.149	17	1.033	*	130/127	0.975	17	[1.131]		131/127	0.863	17	1.05	*	129/128	1.128	17	[1.046]		130/128	0.952
800	gi|53127125	hypothetical protein RCJMB04_1j5 [Gallus gallus]	442	57508	21	15	7	6	17.6	5.11	0.48	Quantitation summary for protein	129/126	1.07	13	[1.090]		130/126	1.226	13	1.097	*	131/126	1.185	13	1.098	*	129/127	0.792	13	1.055	*	130/127	0.925	13	1.06	*	131/127	0.885	13	1.061	*	129/128	0.843	13	1.058	*	130/128	1.002
801	gi|50757382	PREDICTED: prostaglandin E synthase 2 [Gallus gallus]	439	45778	16	13	5	5	18.3	9.45	0.52	Quantitation summary for protein	129/126	0.915	14	1.067	*	130/126	1.047	15	1.06	*	131/126	1.048	15	1.065	*	129/127	0.788	15	[1.074]		130/127	0.934	15	1.094	*	131/127	0.928	14	1.045	*	129/128	0.775	14	1.035	*	130/128	0.894
802	gi|363746070	PREDICTED: protein ETHE1, mitochondrial, partial [Gallus gallus]	438	16536	15	15	3	3	22.7	10.21	1.54	Quantitation summary for protein	129/126	0.972	15	1.055		130/126	0.981	15	[1.095]		131/126	1.025	15	1.057		129/127	0.954	15	1.032	*	130/127	0.983	15	1.066		131/127	1.015	15	1.031		129/128	0.906	15	1.085	*	130/128	0.927
803	gi|53131814	hypothetical protein RCJMB04_12d24 [Gallus gallus]	438	77735	21	17	6	4	15.8	5.26	0.28	Quantitation summary for protein	129/126	0.981	16	[1.080]		130/126	1.027	16	[1.065]		131/126	1.054	16	1.053	*	129/127	0.947	18	[1.045]		130/127	1.012	18	1.061		131/127	1.026	18	1.054		129/128	0.967	17	1.047	*	130/128	1.026
804	gi|60098603	hypothetical protein RCJMB04_3p13 [Gallus gallus]	438	111055	22	18	6	5	7.1	5.32	0.16	Quantitation summary for protein	129/126	1.145	20	1.052	*	130/126	1.1	19	1.031	*	131/126	1.097	20	[1.032]		129/127	0.842	19	1.027	*	130/127	0.837	20	1.052	*	131/127	0.804	20	1.068	*	129/128	0.948	19	1.048	*	130/128	0.951
805	gi|53133542	hypothetical protein RCJMB04_17k23 [Gallus gallus]	436	33156	18	14	8	6	32.5	6.92	0.95	Quantitation summary for protein	129/126	0.927	10	1.059	*	130/126	0.925	10	1.147		131/126	0.989	10	1.094		129/127	1.183	10	1.048	*	130/127	1.205	10	1.147	*	131/127	1.274	10	1.092	*	129/128	1.17	10	1.023	*	130/128	1.075
806	gi|121490095	ubiquitin carboxyl-terminal hydrolase isozyme L1 [Gallus gallus]	436	29505	20	17	6	5	17.4	5.74	0.9	Quantitation summary for protein	129/126	1.572	19	[1.104]		130/126	0.599	19	[1.064]		131/126	0.515	19	[1.077]		129/127	2.483	19	[1.090]		130/127	0.965	19	1.062	*	131/127	0.821	19	1.061	*	129/128	1.719	19	[1.047]		130/128	0.664
807	gi|118104137	PREDICTED: ubiquilin-1 isoform 2 [Gallus gallus]	434	65122	19	17	7	6	16.1	5.15	0.48	Quantitation summary for protein	129/126	1.135	13	1.07	*	130/126	1.028	12	1.088		131/126	1.086	13	1.08	*	129/127	1.027	13	[1.098]		130/127	0.991	13	1.165		131/127	1.005	12	1.095		129/128	1.076	13	1.098	*	130/128	1.033
808	gi|363735855	PREDICTED: heterogeneous nuclear ribonucleoprotein A3 homolog 1-like [Gallus gallus]	434	46733	24	24	4	4	10.9	9.24	0.31	Quantitation summary for protein	129/126	1.651	14	[1.107]		130/126	1.134	14	1.063	*	131/126	1.593	14	[1.084]		129/127	1.207	14	[1.064]		130/127	0.846	14	1.066	*	131/127	1.176	14	1.046	*	129/128	1.176	14	[1.052]		130/128	0.819
809	gi|363742061	PREDICTED: eukaryotic translation initiation factor 4 gamma 3 [Gallus gallus]	432	202738	28	18	8	6	4.9	5.13	0.14	Quantitation summary for protein	129/126	1.1	6	1.051	*	130/126	1.025	5	1.036		131/126	1.002	6	1.046		129/127	0.973	6	1.03		130/127	0.951	6	1.048	*	131/127	0.894	6	1.038	*	129/128	0.997	6	1.05		130/128	0.97
810	gi|363734901	PREDICTED: fermitin family homolog 2 isoform 1 [Gallus gallus]	431	92649	22	20	7	7	11.2	6.22	0.32	Quantitation summary for protein	129/126	1.185	21	[1.063]		130/126	0.867	21	1.044	*	131/126	0.932	21	1.048	*	129/127	1.232	21	1.042	*	130/127	0.92	21	[1.048]		131/127	0.978	21	1.028	*	129/128	1.139	21	[1.030]		130/128	0.843
811	gi|363729287	PREDICTED: complement C4-like [Gallus gallus]	430	220857	22	20	9	8	5.8	7.07	0.12	Quantitation summary for protein	129/126	1.677	21	1.055	*	130/126	1.271	21	1.032	*	131/126	1.843	21	1.056	*	129/127	1.39	21	1.038	*	130/127	1.076	21	1.03	*	131/127	1.544	21	1.04	*	129/128	1.335	21	1.043	*	130/128	1.026
812	gi|12656073	ubiquitin fusion-degradation 1-like protein [Gallus gallus]	430	39638	29	20	8	8	28	6.26	1.06	Quantitation summary for protein	129/126	1.029	24	1.029	*	130/126	1.028	25	1.051	*	131/126	1.02	25	1.041	*	129/127	1.011	25	[1.038]		130/127	1.038	25	1.048	*	131/127	1.019	25	1.044	*	129/128	1.001	25	1.026		130/128	1.021
813	gi|118098520	PREDICTED: diablo homolog, mitochondrial [Gallus gallus]	428	28889	14	11	3	2	11.2	6.19	0.24	Quantitation summary for protein	129/126	0.786	11	1.038	*	130/126	1.224	11	1.043	*	131/126	0.715	10	1.047	*	129/127	0.922	11	1.022	*	130/127	1.464	11	1.06	*	131/127	0.889	11	[1.044]		129/128	0.874	11	1.019	*	130/128	1.381
814	gi|46399077	type II alpha-keratin IIC [Gallus gallus]	428	64601	38	31	10	8	14	8.29	0.73	Quantitation summary for protein	129/126	0.274	9	1.181	*	130/126	0.565	9	[1.133]		131/126	0.482	9	[1.119]		129/127	0.512	9	1.116	*	130/127	1.079	9	1.108		131/127	0.91	9	1.105	*	129/128	0.725	9	1.059	*	130/128	1.518
815	gi|50750473	PREDICTED: kelch repeat and BTB domain-containing protein 10 [Gallus gallus]	425	81224	37	22	12	9	19.1	5.17	0.61	Quantitation summary for protein	129/126	1.183	29	[1.056]		130/126	0.875	30	[1.088]		131/126	0.937	29	[1.082]		129/127	1.366	29	[1.077]		130/127	1.032	30	[1.071]		131/127	1.093	29	[1.061]		129/128	1.286	29	1.031	*	130/128	0.965
816	gi|68159406	20-hydroxysteroid dehydrogenase [Gallus gallus]	424	35791	14	12	7	5	25.7	8.5	0.7	Quantitation summary for protein	129/126	1.064	11	1.202		130/126	0.936	12	1.151		131/126	1.121	12	[1.130]		129/127	1.158	11	1.371		130/127	1.014	12	1.037		131/127	1.202	12	[1.092]		129/128	0.893	11	1.336		130/128	0.783
817	gi|310750337	proteasome subunit alpha type-4 [Gallus gallus]	424	35722	27	25	10	10	36.8	6.92	1.9	Quantitation summary for protein	129/126	0.999	25	[1.038]		130/126	0.819	25	1.051	*	131/126	0.88	24	1.037	*	129/127	1.082	25	[1.043]		130/127	0.905	25	[1.056]		131/127	0.957	25	1.041	*	129/128	0.899	25	1.036	*	130/128	0.748
818	gi|363743445	PREDICTED: dual specificity protein phosphatase 3 [Gallus gallus]	423	19567	15	15	3	3	24	8.89	0.61	Quantitation summary for protein	129/126	1.546	14	1.078	*	130/126	0.739	14	1.07	*	131/126	0.648	14	1.084	*	129/127	1.429	15	1.081	*	130/127	0.707	15	1.092	*	131/127	0.613	15	1.098	*	129/128	0.743	15	1.039	*	130/128	0.365
819	gi|118104643	PREDICTED: uncharacterized protein LOC768709 [Gallus gallus]	421	30422	26	24	6	5	30.1	9.17	0.68	Quantitation summary for protein	129/126	1.084	24	1.054	*	130/126	1.338	24	[1.071]		131/126	1.216	24	[1.050]		129/127	1.021	24	1.037	*	130/127	1.285	24	[1.090]		131/127	1.156	24	[1.065]		129/128	1.07	23	1.031	*	130/128	1.349
820	gi|60099015	hypothetical protein RCJMB04_19g16 [Gallus gallus]	418	64504	21	17	7	6	21.5	5.57	0.42	Quantitation summary for protein	129/126	1.086	21	1.056	*	130/126	1.007	21	1.048		131/126	1.258	20	1.031	*	129/127	0.942	21	1.042	*	130/127	0.891	21	1.035	*	131/127	1.103	21	1.031	*	129/128	1.093	21	1.038	*	130/128	1.028
821	gi|53129426	hypothetical protein RCJMB04_5l9 [Gallus gallus]	418	135451	33	15	13	7	12.7	5.14	0.3	Quantitation summary for protein	129/126	0.946	20	1.051	*	130/126	0.916	20	1.067	*	131/126	0.965	20	1.058	*	129/127	0.947	20	1.049	*	130/127	0.936	20	1.074	*	131/127	0.975	20	1.054	*	129/128	0.914	20	1.057	*	130/128	0.898
822	gi|53134733	hypothetical protein RCJMB04_23k10 [Gallus gallus]	417	27804	25	22	11	9	52	8.59	4.48	Quantitation summary for protein	129/126	0.819	16	1.052	*	130/126	0.959	17	[1.098]		131/126	0.841	17	[1.141]		129/127	0.878	17	[1.063]		130/127	1.044	17	[1.113]		131/127	0.906	17	[1.169]		129/128	1.135	17	1.094	*	130/128	1.341
823	gi|48479076	ribosomal protein S13 [Gallus gallus]	417	21566	22	15	9	6	50.3	10.53	1.38	Quantitation summary for protein	129/126	1.271	16	1.038	*	130/126	1.283	16	1.043	*	131/126	1.217	16	1.03	*	129/127	0.97	16	1.032	*	130/127	0.999	16	1.049		131/127	0.938	16	1.04	*	129/128	1.001	16	1.017		130/128	1.025
824	gi|547653	RecName: Full=Hydroxymethylglutaryl-CoA lyase, mitochondrial; Short=HL; Short=HMG-CoA lyase; AltName: Full=3-hydroxy-3-methylglutarate-CoA lyase	415	35539	15	12	7	5	23.8	7.07	0.87	Quantitation summary for protein	129/126	0.98	14	1.017	*	130/126	0.961	15	1.057	*	131/126	0.979	15	[1.048]		129/127	0.929	14	1.037	*	130/127	0.875	15	1.034	*	131/127	0.882	15	1.028	*	129/128	0.939	15	1.031	*	130/128	0.933
825	gi|53134367	hypothetical protein RCJMB04_23b19 [Gallus gallus]	415	26716	16	14	7	6	36.9	5.74	1.28	Quantitation summary for protein	129/126	1.122	15	1.079	*	130/126	1.022	15	1.076		131/126	0.936	14	1.037	*	129/127	1.18	15	1.047	*	130/127	1.123	16	1.07	*	131/127	1.015	14	1.033		129/128	1.283	15	1.046	*	130/128	1.185
826	gi|50740570	PREDICTED: epoxide hydrolase 1-like [Gallus gallus]	415	63081	16	15	5	4	9.3	8.96	0.29	Quantitation summary for protein	129/126	0.746	16	[1.066]		130/126	1.125	16	[1.058]		131/126	0.88	16	1.032	*	129/127	0.645	16	1.049	*	130/127	0.993	16	1.04		131/127	0.769	16	1.036	*	129/128	0.706	16	1.065	*	130/128	1.08
827	gi|3184510	GTPase cRac1A [Gallus gallus]	413	25960	15	15	5	5	27.1	8.77	0.83	Quantitation summary for protein	129/126	0.984	11	1.072		130/126	0.875	11	1.099	*	131/126	0.889	10	1.038	*	129/127	1.021	11	1.061		130/127	0.928	11	1.161		131/127	0.94	11	1.095	*	129/128	1.423	11	1.083	*	130/128	1.284
828	gi|118091246	PREDICTED: 60S ribosomal protein L27a [Gallus gallus]	411	21266	16	16	4	4	25.7	10.86	1.08	Quantitation summary for protein	129/126	1.45	15	1.135	*	130/126	1.539	15	[1.426]		131/126	1.28	15	1.13	*	129/127	0.924	15	1.076	*	130/127	1.001	15	[1.387]		131/127	0.824	15	1.085	*	129/128	1.1	13	1.048	*	130/128	1.183
829	gi|53136550	hypothetical protein RCJMB04_30j1 [Gallus gallus]	408	83209	24	19	10	7	18	5.51	0.42	Quantitation summary for protein	129/126	1.107	18	1.04	*	130/126	1.04	18	1.055	*	131/126	1.431	18	[1.035]		129/127	1.148	18	1.035	*	130/127	1.096	17	1.066	*	131/127	1.498	18	[1.045]		129/128	1.254	18	1.036	*	130/128	1.195
830	gi|109390188	5~-AMP-activated protein kinase beta-2 non-catalytic subunit transcript variant 2 [Gallus gallus]	408	35492	13	12	4	4	25.2	6.15	0.43	Quantitation summary for protein	129/126	1.094	12	1.095	*	130/126	1.158	12	1.058	*	131/126	1.077	12	1.064	*	129/127	0.777	12	1.04	*	130/127	0.84	12	1.105	*	131/127	0.773	12	1.132	*	129/128	0.773	12	1.04	*	130/128	0.829
831	gi|63765	ras-like protein [Gallus gallus]	408	28937	17	15	7	6	32.4	7.7	1.14	Quantitation summary for protein	129/126	1.017	15	1.064		130/126	1.026	15	1.068		131/126	1.074	15	[1.075]		129/127	1.011	15	[1.078]		130/127	1.042	15	1.087		131/127	1.079	15	[1.102]		129/128	1.06	14	1.028	*	130/128	1.004
832	gi|5163126	chromatin assembly factor 1 p48 subunit [Gallus gallus]	407	53362	14	10	5	4	10.6	4.74	0.27	Quantitation summary for protein	129/126	1.294	10	1.022	*	130/126	0.831	9	1.069	*	131/126	1.111	9	1.059	*	129/127	1.033	10	1.021	*	130/127	0.747	10	[1.121]		131/127	0.947	10	[1.088]		129/128	1.053	10	1.016	*	130/128	0.683
833	gi|53130410	hypothetical protein RCJMB04_7i20 [Gallus gallus]	407	18967	17	13	2	2	12.2	7.67	0.63	Quantitation summary for protein	129/126	1.059	15	1.057	*	130/126	0.922	15	1.111	*	131/126	0.984	15	1.072		129/127	1.084	15	1.07	*	130/127	0.963	15	[1.105]		131/127	1.017	15	[1.043]		129/128	1.107	15	1.042	*	130/128	0.978
834	gi|50760435	PREDICTED: 60S ribosomal protein L10a [Gallus gallus]	407	32884	30	20	9	8	35.9	9.88	1.62	Quantitation summary for protein	129/126	1.892	24	1.113	*	130/126	1.828	24	[1.171]		131/126	1.59	24	[1.123]		129/127	0.961	24	[1.086]		130/127	0.948	24	[1.178]		131/127	0.816	24	[1.118]		129/128	1.284	24	1.042	*	130/128	1.259
835	gi|363734430	PREDICTED: EH domain-containing protein 4-like [Gallus gallus]	406	64826	33	16	5	4	11.6	6.55	0.22	Quantitation summary for protein	129/126	0.833	7	1.039	*	130/126	0.879	8	1.086	*	131/126	0.818	8	1.104	*	129/127	0.95	8	1.068		130/127	0.956	7	1.033	*	131/127	0.878	7	1.053	*	129/128	1.049	8	1.093		130/128	1.046
836	gi|118090053	PREDICTED: hydroxyacyl-coenzyme A dehydrogenase, mitochondrial [Gallus gallus]	405	41561	43	26	12	8	33	8.68	2.16	Quantitation summary for protein	129/126	0.808	36	[1.067]		130/126	0.952	36	[1.197]		131/126	0.861	36	[1.118]		129/127	0.903	36	[1.048]		130/127	1.087	36	[1.207]		131/127	0.971	36	[1.127]		129/128	0.812	36	1.047	*	130/128	0.971
837	gi|53127696	hypothetical protein RCJMB04_2p17 [Gallus gallus]	405	16516	9	9	2	2	20.9	11.01	0.75	Quantitation summary for protein	129/126	1.226	9	1.062	*	130/126	1.141	9	1.058	*	131/126	1.183	8	1.065	*	129/127	0.911	8	1.06	*	130/127	0.869	9	[1.149]		131/127	0.871	9	[1.135]		129/128	1.006	8	1.037		130/128	0.952
838	gi|2281033	vigilin [Gallus gallus]	403	169170	24	18	11	9	9.6	6.74	0.26	Quantitation summary for protein	129/126	1.573	23	1.069	*	130/126	1.088	23	1.056	*	131/126	1.384	23	1.048	*	129/127	0.93	23	[1.039]		130/127	0.657	23	1.055	*	131/127	0.827	23	1.036	*	129/128	0.997	23	1.031		130/128	0.699
839	gi|1922282	vitronectin [Gallus gallus]	403	56470	17	14	4	4	9.3	5.17	0.33	Quantitation summary for protein	129/126	1.52	15	1.05	*	130/126	1.321	15	[1.055]		131/126	1.552	15	1.069	*	129/127	1.325	15	1.057	*	130/127	1.175	15	[1.058]		131/127	1.367	15	[1.079]		129/128	1.402	15	[1.058]		130/128	1.236
840	gi|363741109	PREDICTED: phosphatidylinositol transfer protein alpha isoform-like [Gallus gallus]	402	25602	29	15	9	5	41.4	6.34	1.66	Quantitation summary for protein	129/126	0.972	21	1.04	*	130/126	0.823	21	1.053	*	131/126	0.94	20	1.028	*	129/127	1.083	21	1.04	*	130/127	0.935	21	1.061	*	131/127	1.024	21	1.051	*	129/128	1.022	21	1.031	*	130/128	0.877
841	gi|53127334	hypothetical protein RCJMB04_1n18 [Gallus gallus]	402	16469	16	16	2	2	15.6	5.76	0.75	Quantitation summary for protein	129/126	0.782	15	1.119	*	130/126	1.267	15	1.111	*	131/126	0.983	14	1.058		129/127	0.903	16	[1.131]		130/127	1.493	16	1.172	*	131/127	1.123	15	1.093	*	129/128	1.034	16	1.08		130/128	1.699
842	gi|53133716	hypothetical protein RCJMB04_19j20 [Gallus gallus]	401	43456	25	22	8	7	23.5	8.09	0.8	Quantitation summary for protein	129/126	1.127	22	1.055	*	130/126	0.943	22	1.072	*	131/126	1.155	22	1.068	*	129/127	1.019	22	1.067		130/127	0.87	22	1.089	*	131/127	1.055	22	1.07	*	129/128	0.901	20	1.033	*	130/128	0.765
843	gi|4959550	glutathione S-transferase class-alpha [Gallus gallus]	400	26597	23	22	6	6	32.3	8.03	1.03	Quantitation summary for protein	129/126	1.538	5	1.047	*	130/126	1.101	5	1.052	*	131/126	0.773	5	1.142	*	129/127	1.361	5	1.084	*	130/127	0.995	5	1.088		131/127	0.691	5	1.161	*	129/128	1.165	5	1.044	*	130/128	0.846
844	gi|363731690	PREDICTED: UPF0364 protein C6orf211 homolog [Gallus gallus]	399	57395	19	15	9	7	24	5.61	0.75	Quantitation summary for protein	129/126	0.957	18	1.043	*	130/126	0.82	18	[1.082]		131/126	0.807	18	1.047	*	129/127	1.18	18	1.031	*	130/127	1.032	18	[1.064]		131/127	1.004	18	1.039		129/128	1.105	18	[1.043]		130/128	0.96
845	gi|118084650	PREDICTED: propionyl-CoA carboxylase alpha chain, mitochondrial [Gallus gallus]	397	90476	15	13	8	6	13.3	7.85	0.28	Quantitation summary for protein	129/126	1.013	14	1.042		130/126	1.053	14	1.058	*	131/126	0.98	14	1.034	*	129/127	0.986	14	1.034		130/127	1.046	14	1.059	*	131/127	0.963	14	1.048	*	129/128	0.911	14	[1.050]		130/128	0.961
846	gi|53130330	hypothetical protein RCJMB04_7b3 [Gallus gallus]	397	45876	27	24	7	6	17.1	6.48	0.74	Quantitation summary for protein	129/126	1.056	26	1.044	*	130/126	0.989	26	1.066		131/126	1.011	26	1.044		129/127	1.09	26	1.028	*	130/127	1.041	26	[1.075]		131/127	1.054	26	1.033	*	129/128	1.013	26	1.026	*	130/128	0.962
847	gi|114391	RecName: Full=Sodium/potassium-transporting ATPase subunit beta-1; AltName: Full=Sodium/potassium-dependent ATPase subunit beta-1	397	41963	22	16	4	3	12.8	7.44	0.58	Quantitation summary for protein	129/126	0.902	18	[1.051]		130/126	0.743	17	1.025	*	131/126	0.833	17	1.03	*	129/127	1.247	17	1.047	*	130/127	1.064	18	1.084	*	131/127	1.305	18	1.095	*	129/128	1.137	18	1.044	*	130/128	0.956
848	gi|53130886	hypothetical protein RCJMB04_10n18 [Gallus gallus]	397	32855	26	25	6	6	18.9	4.9	0.78	Quantitation summary for protein	129/126	1.039	25	1.032	*	130/126	1.129	25	[1.081]		131/126	1.075	25	[1.044]		129/127	0.932	25	[1.016]		130/127	1.033	25	[1.094]		131/127	0.974	25	[1.057]		129/128	0.964	25	1.027	*	130/128	1.062
849	gi|60098569	hypothetical protein RCJMB04_3m23 [Gallus gallus]	396	21517	16	15	4	3	29.8	9.16	0.78	Quantitation summary for protein	129/126	1.024	9	1.036		130/126	1.018	9	1.054		131/126	0.973	9	[1.060]		129/127	1.072	9	1.038	*	130/127	1.088	9	1.05	*	131/127	1.028	9	1.066		129/128	1.036	9	1.035	*	130/128	1.045
850	gi|135767	RecName: Full=Thioredoxin; Short=Trx	396	15186	19	15	5	4	29.5	5.1	2.35	Quantitation summary for protein	129/126	1.196	15	1.052	*	130/126	1.433	15	1.064	*	131/126	1.515	15	[1.042]		129/127	1.12	15	1.033	*	130/127	1.369	15	1.075	*	131/127	1.433	15	1.04	*	129/128	1.322	15	[1.059]		130/128	1.606
851	gi|60099253	hypothetical protein RCJMB04_39g7 [Gallus gallus]	396	31107	20	10	4	3	19	4.74	0.5	Quantitation summary for protein	129/126	0.808	10	1.164	*	130/126	0.598	10	1.219	*	131/126	0.61	10	1.338	*	129/127	0.905	10	1.107	*	130/127	0.684	10	1.219	*	131/127	0.69	10	1.323	*	129/128	0.849	10	1.126	*	130/128	0.638
852	gi|118096822	PREDICTED: transketolase [Gallus gallus]	394	79694	19	18	8	7	15.2	7.27	0.33	Quantitation summary for protein	129/126	1.162	18	1.029	*	130/126	0.714	18	1.065	*	131/126	0.984	18	1.051		129/127	1.335	18	1.02	*	130/127	0.837	18	1.074	*	131/127	1.142	18	1.055	*	129/128	1.199	18	1.019	*	130/128	0.747
853	gi|363745006	PREDICTED: keratin, type II cytoskeletal 75 [Gallus gallus]	393	68571	32	28	6	6	8.7	6.45	0.45	Quantitation summary for protein	129/126	0.313	6	1.151	*	130/126	0.877	6	1.086	*	131/126	0.699	6	[1.190]		129/127	0.566	6	1.094	*	130/127	1.622	6	1.107	*	131/127	1.279	6	1.082	*	129/128	0.768	6	1.062	*	130/128	2.185
854	gi|24080794	phospholipid hydroperoxide glutathione peroxidase [Gallus gallus]	392	22992	19	17	5	4	28.8	7.68	0.97	Quantitation summary for protein	129/126	0.361	17	1.103	*	130/126	0.334	18	1.12	*	131/126	0.36	18	1.13	*	129/127	0.425	18	1.137	*	130/127	0.341	18	[1.128]		131/127	0.363	18	[1.137]		129/128	0.396	18	1.137	*	130/128	0.316
855	gi|21780320	CAP23 [Gallus gallus]	392	33902	18	17	6	6	29.9	4.66	0.75	Quantitation summary for protein	129/126	0.899	17	1.055	*	130/126	0.597	16	1.074	*	131/126	0.94	17	[1.075]		129/127	1.113	17	1.031	*	130/127	0.747	17	1.106	*	131/127	1.176	17	1.096	*	129/128	1.191	17	1.026	*	130/128	0.794
856	gi|226437575	NADH dehydrogenase [ubiquinone] iron-sulfur protein 3, mitochondrial [Gallus gallus]	391	32536	26	19	13	10	49.8	6.55	1.91	Quantitation summary for protein	129/126	1.002	21	[1.050]		130/126	0.983	21	[1.218]		131/126	0.934	21	1.088	*	129/127	0.962	21	1.048	*	130/127	0.962	21	[1.234]		131/127	0.923	19	1.072	*	129/128	0.825	21	1.06	*	130/128	0.82
857	gi|7415601	protein kinase C inhibitor [Gallus gallus]	391	15697	13	11	3	3	36.5	6.28	1.19	Quantitation summary for protein	129/126	0.711	13	1.126	*	130/126	1.113	13	1.034	*	131/126	1.007	13	1.054		129/127	0.931	13	1.067	*	130/127	1.488	13	1.083	*	131/127	1.332	13	1.05	*	129/128	1.087	13	1.027	*	130/128	1.725
858	gi|44969305	ribosomal protein L19 [Gallus gallus]	391	27341	14	13	5	4	23	11.57	0.59	Quantitation summary for protein	129/126	1.343	13	1.071	*	130/126	1.635	13	1.183	*	131/126	1.539	13	1.122	*	129/127	1.005	13	1.072		130/127	1.248	13	[1.148]		131/127	1.163	13	[1.081]		129/128	1.061	13	1.032	*	130/128	1.309
859	gi|50752104	PREDICTED: septin-2 [Gallus gallus]	391	48085	8	8	3	3	12.2	5.91	0.22	Quantitation summary for protein	129/126	---	1	---		130/126	---	1	---		131/126	---	1	---		129/127	---	1	---		130/127	---	1	---		131/127	---	1	---		129/128	---	1	---		130/128	---
860	gi|53135495	hypothetical protein RCJMB04_25e17 [Gallus gallus]	391	25743	17	13	7	6	38	5.33	2	Quantitation summary for protein	129/126	1.096	17	1.052	*	130/126	1.023	17	1.055		131/126	1.073	17	1.05	*	129/127	0.988	17	1.036		130/127	0.941	17	[1.061]		131/127	0.976	17	1.046	*	129/128	1.02	17	[1.049]		130/128	0.965
861	gi|53133550	hypothetical protein RCJMB04_17l24 [Gallus gallus]	390	52990	25	17	9	7	24	4.93	0.72	Quantitation summary for protein	129/126	0.978	19	1.03	*	130/126	0.884	19	1.065	*	131/126	0.85	19	1.039	*	129/127	0.959	19	[1.045]		130/127	0.885	19	1.054	*	131/127	0.842	19	1.037	*	129/128	0.934	19	[1.042]		130/128	0.857
862	gi|53130454	hypothetical protein RCJMB04_7p8 [Gallus gallus]	389	55610	18	16	7	6	17.1	6.49	0.41	Quantitation summary for protein	129/126	1.002	15	1.024		130/126	0.99	15	1.03		131/126	1.172	15	1.024	*	129/127	0.905	14	1.02	*	130/127	0.917	15	1.018	*	131/127	1.073	15	[1.030]		129/128	0.947	15	1.019	*	130/128	0.949
863	gi|806554	actin-like protein [Gallus gallus]	388	51146	36	17	4	3	9.4	6.3	0.21	Quantitation summary for protein	129/126	1.156	10	1.024	*	130/126	0.943	10	1.027	*	131/126	1.063	10	1.027	*	129/127	1.032	10	1.022	*	130/127	0.859	10	1.031	*	131/127	0.958	10	1.016	*	129/128	1.135	9	1.013	*	130/128	0.955
864	gi|118103065	PREDICTED: mitochondrial import inner membrane translocase subunit TIM44 [Gallus gallus]	388	62574	16	12	7	6	15.3	8.29	0.43	Quantitation summary for protein	129/126	1.508	12	1.087	*	130/126	1.005	12	[1.150]		131/126	0.921	12	1.113	*	129/127	1.094	12	[1.121]		130/127	0.744	12	[1.125]		131/127	0.675	12	1.082	*	129/128	0.744	12	1.056	*	130/128	0.503
865	gi|53130724	hypothetical protein RCJMB04_9l5 [Gallus gallus]	387	28315	18	16	3	3	18.1	6.43	0.4	Quantitation summary for protein	129/126	0.954	16	1.038	*	130/126	0.877	16	1.034	*	131/126	0.845	16	1.039	*	129/127	1.075	16	[1.043]		130/127	1.009	16	1.033		131/127	0.962	16	1.036	*	129/128	1.004	16	1.031		130/128	0.937
866	gi|363736886	PREDICTED: calponin-3 [Gallus gallus]	387	42531	14	13	6	5	24.8	6.2	0.45	Quantitation summary for protein	129/126	1.153	13	1.017	*	130/126	1.094	13	1.056	*	131/126	1.291	13	1.054	*	129/127	1.023	13	1.027	*	130/127	0.991	13	1.046		131/127	1.157	13	1.036	*	129/128	1.079	13	1.016	*	130/128	1.039
867	gi|60098741	hypothetical protein RCJMB04_7k16 [Gallus gallus]	384	59671	31	22	10	6	17.5	8.76	0.38	Quantitation summary for protein	129/126	1.126	24	1.034	*	130/126	0.932	23	1.034	*	131/126	1.193	24	[1.044]		129/127	0.992	24	1.029		130/127	0.829	24	1.056	*	131/127	1.062	24	[1.047]		129/128	1.05	24	1.023	*	130/128	0.884
868	gi|363727357	PREDICTED: coiled-coil-helix-coiled-coil-helix domain-containing protein 3, mitochondrial isoform 2 [Gallus gallus]	382	31784	21	12	7	6	24.9	9.1	1.45	Quantitation summary for protein	129/126	0.94	20	1.023	*	130/126	1.017	21	1.039		131/126	1.008	21	1.05		129/127	0.894	21	1.032	*	130/127	0.989	21	1.061		131/127	0.971	21	1.054	*	129/128	0.796	21	1.059	*	130/128	0.967
869	gi|60099079	hypothetical protein RCJMB04_23c19 [Gallus gallus]	382	54948	18	17	10	9	27.8	8.08	0.69	Quantitation summary for protein	129/126	1.219	17	1.061	*	130/126	1.054	17	1.035	*	131/126	1.108	16	1.039	*	129/127	1.133	17	1.039	*	130/127	1	17	1.035		131/127	1.031	17	1.05	*	129/128	1.078	16	1.015	*	130/128	0.942
870	gi|118083116	PREDICTED: sorting and assembly machinery component 50 homolog [Gallus gallus]	380	57514	30	19	14	10	30.1	5.99	0.95	Quantitation summary for protein	129/126	0.956	20	1.036	*	130/126	1.015	20	1.111		131/126	0.998	20	[1.103]		129/127	0.964	20	1.044	*	130/127	1.045	20	1.114		131/127	1.017	20	[1.097]		129/128	0.861	20	1.036	*	130/128	0.927
871	gi|53133330	hypothetical protein RCJMB04_15i13 [Gallus gallus]	380	63568	19	17	7	6	16.4	8.38	0.42	Quantitation summary for protein	129/126	0.842	18	1.083	*	130/126	0.958	18	[1.073]		131/126	1.106	18	[1.092]		129/127	0.899	18	[1.073]		130/127	1.045	18	1.067	*	131/127	1.194	18	[1.097]		129/128	0.937	18	1.05	*	130/128	1.081
872	gi|363728127	PREDICTED: myosin-binding protein C, slow-type [Gallus gallus]	379	151496	14	13	3	3	2.7	5.6	0.09	Quantitation summary for protein	129/126	0.267	4	1.129	*	130/126	1.506	4	1.081	*	131/126	0.945	4	1.102		129/127	0.756	4	1.261		130/127	4.354	4	[1.436]		131/127	2.704	4	1.304	*	129/128	1.748	4	1.288	*	130/128	10.003
873	gi|50748450	PREDICTED: protein transport protein Sec23A [Gallus gallus]	379	93918	21	19	9	8	11.9	6.51	0.41	Quantitation summary for protein	129/126	1.186	19	1.047	*	130/126	0.895	19	1.06	*	131/126	1.042	18	1.045	*	129/127	1.017	19	1.044		130/127	0.783	19	1.067	*	131/127	0.901	19	1.054	*	129/128	1.098	19	[1.061]		130/128	0.84
874	gi|50745642	PREDICTED: ribose-phosphate pyrophosphokinase 1 isoform 2 [Gallus gallus]	378	40738	31	23	11	7	32.1	6.45	1.18	Quantitation summary for protein	129/126	0.84	23	1.036	*	130/126	0.763	24	1.051	*	131/126	0.776	23	1.058	*	129/127	0.879	24	1.035	*	130/127	0.807	24	1.053	*	131/127	0.812	23	1.054	*	129/128	0.876	24	1.028	*	130/128	0.795
875	gi|53133806	hypothetical protein RCJMB04_20i16 [Gallus gallus]	377	76391	29	25	9	8	15.4	5.99	0.4	Quantitation summary for protein	129/126	1.349	25	1.06	*	130/126	0.976	25	[1.060]		131/126	1.005	25	1.038		129/127	1.036	25	1.082	*	130/127	0.765	25	1.07	*	131/127	0.78	25	1.043	*	129/128	0.881	25	1.035	*	130/128	0.646
876	gi|310923120	tetratricopeptide repeat protein 35 [Gallus gallus]	377	40361	13	13	3	3	14.8	6.15	0.37	Quantitation summary for protein	129/126	0.966	13	[1.064]		130/126	1.01	13	1.015	*	131/126	1.018	13	1.018	*	129/127	0.835	13	[1.048]		130/127	0.891	13	[1.060]		131/127	0.888	13	1.063	*	129/128	0.973	13	[1.088]		130/128	1.032
877	gi|53130712	hypothetical protein RCJMB04_9k9 [Gallus gallus]	377	25325	27	24	9	7	45.2	7.63	1.38	Quantitation summary for protein	129/126	0.922	6	1.033	*	130/126	0.7	6	1.073	*	131/126	0.869	6	1.047	*	129/127	1.106	6	1.038	*	130/127	0.857	6	1.016	*	131/127	1.053	6	1.036	*	129/128	1.036	6	1.019	*	130/128	0.798
878	gi|53132618	hypothetical protein RCJMB04_13l2 [Gallus gallus]	377	56491	29	17	12	9	25.6	5.81	0.86	Quantitation summary for protein	129/126	1.125	20	[1.041]		130/126	0.972	20	[1.056]		131/126	0.968	20	1.037	*	129/127	0.973	19	1.027	*	130/127	0.864	20	[1.073]		131/127	0.851	20	[1.052]		129/128	1.073	20	1.023	*	130/128	0.941
879	gi|53128551	hypothetical protein RCJMB04_4o23 [Gallus gallus]	376	53016	19	17	7	6	18.5	7.66	0.72	Quantitation summary for protein	129/126	1.217	18	1.018	*	130/126	1.299	19	1.061	*	131/126	1.443	19	1.042	*	129/127	0.953	19	1.029	*	130/127	1.039	19	1.062	*	131/127	1.142	19	1.048	*	129/128	0.863	19	1.031	*	130/128	0.935
880	gi|10505269	integrin-linked kinase [Gallus gallus]	375	58759	17	15	5	4	11.7	8.36	0.31	Quantitation summary for protein	129/126	1.227	16	[1.046]		130/126	1.072	16	1.039	*	131/126	1.034	16	1.03	*	129/127	1.053	16	1.026	*	130/127	0.939	16	[1.041]		131/127	0.896	16	1.028	*	129/128	1.162	16	[1.048]		130/128	1.03
881	gi|118089003	PREDICTED: isoamyl acetate-hydrolyzing esterase 1 homolog [Gallus gallus]	374	30442	20	18	5	5	25.3	5.72	0.86	Quantitation summary for protein	129/126	0.809	19	1.117	*	130/126	1.031	19	[1.156]		131/126	0.817	19	1.107	*	129/127	0.909	19	1.086	*	130/127	1.182	19	[1.123]		131/127	0.923	17	1.074	*	129/128	0.889	19	[1.091]		130/128	1.15
882	gi|47846181	basement membrane-specific heparan sulfate proteoglycan core protein precursor [Gallus gallus]	374	458531	20	17	9	8	2.1	5.85	0.07	Quantitation summary for protein	129/126	1.023	18	1.058		130/126	1.284	18	1.067	*	131/126	1.529	18	1.084	*	129/127	0.927	18	[1.089]		130/127	1.187	18	[1.127]		131/127	1.399	18	[1.185]		129/128	1.018	18	[1.082]		130/128	1.297
883	gi|14211655	FK506 bing protein 12 [Gallus gallus]	373	14084	10	9	3	2	29.6	7.88	1.38	Quantitation summary for protein	129/126	0.898	8	1.078	*	130/126	1.112	8	1.075	*	131/126	0.782	9	1.219	*	129/127	1.042	8	1.033	*	130/127	0.511	9	[1.383]		131/127	0.359	9	[1.532]		129/128	0.864	9	1.157	*	130/128	0.533
884	gi|313661460	exportin-1 [Gallus gallus]	373	138655	25	19	10	6	10.6	5.74	0.15	Quantitation summary for protein	129/126	0.964	19	1.03	*	130/126	0.957	19	[1.061]		131/126	0.843	19	1.054	*	129/127	0.997	19	[1.035]		130/127	1.01	19	1.067		131/127	0.88	19	1.041	*	129/128	1.36	19	1.038	*	130/128	1.369
885	gi|363740228	PREDICTED: glutathione S-transferase theta-1-like isoform 1 [Gallus gallus]	373	32634	12	9	4	2	19	6.56	0.62	Quantitation summary for protein	129/126	0.898	10	1.08	*	130/126	0.742	10	1.065	*	131/126	0.803	10	[1.110]		129/127	1.063	10	1.033	*	130/127	0.896	10	1.064	*	131/127	0.959	10	1.092		129/128	1.049	10	1.058	*	130/128	0.878
886	gi|53130414	hypothetical protein RCJMB04_7j3 [Gallus gallus]	373	66299	16	14	7	6	14.5	5.8	0.4	Quantitation summary for protein	129/126	1.181	15	1.039	*	130/126	0.963	15	1.039	*	131/126	1.095	15	1.037	*	129/127	0.966	15	1.038	*	130/127	0.804	15	1.051	*	131/127	0.905	15	1.053	*	129/128	0.992	15	1.05		130/128	0.821
887	gi|16930387	cardiac and skeletal muscle-specific BOP1 [Gallus gallus]	373	65839	25	16	11	8	18.3	6.83	0.71	Quantitation summary for protein	129/126	0.862	23	1.048	*	130/126	1.162	23	[1.092]		131/126	0.938	23	[1.069]		129/127	1.251	23	1.029	*	130/127	1.721	23	1.111	*	131/127	1.373	23	[1.085]		129/128	1.475	23	1.044	*	130/128	2.017
888	gi|118097096	PREDICTED: THUMP domain-containing protein 3 isoform 2 [Gallus gallus]	373	65040	13	12	4	4	9.9	5.85	0.28	Quantitation summary for protein	129/126	1.017	11	1.023	*	130/126	0.786	12	1.05	*	131/126	0.966	12	1.061		129/127	0.988	12	1.044		130/127	0.783	12	1.04	*	131/127	0.952	12	[1.041]		129/128	0.951	12	1.069	*	130/128	0.749
889	gi|325530060	RecName: Full=Heat shock 70 kDa protein 14	372	63070	24	18	10	9	20.2	5.15	0.66	Quantitation summary for protein	129/126	1.153	18	[1.087]		130/126	0.954	18	1.042	*	131/126	1.051	18	1.041	*	129/127	1.119	18	[1.095]		130/127	0.96	17	1.041	*	131/127	1.03	18	1.053	*	129/128	0.925	18	1.039	*	130/128	0.776
890	gi|127513	RecName: Full=Ig mu chain C region	372	52723	23	16	7	4	16.8	6.07	0.53	Quantitation summary for protein	129/126	2.283	21	1.061	*	130/126	1.969	21	1.049	*	131/126	2.614	21	[1.070]		129/127	1.869	21	1.047	*	130/127	1.645	21	1.047	*	131/127	2.16	21	1.059	*	129/128	1.806	21	1.054	*	130/128	1.58
891	gi|363743624	PREDICTED: 40S ribosomal protein S28 [Gallus gallus]	372	8810	22	22	2	2	30.4	10.7	2.83	Quantitation summary for protein	129/126	1.386	22	[1.077]		130/126	1.142	22	1.098	*	131/126	1.238	22	1.068	*	129/127	1.097	22	[1.100]		130/127	0.923	22	[1.073]		131/127	0.99	22	[1.040]		129/128	0.81	21	1.023	*	130/128	0.684
892	gi|53131721	hypothetical protein RCJMB04_12b19 [Gallus gallus]	372	128316	20	17	11	10	10.9	6.45	0.29	Quantitation summary for protein	129/126	1.035	18	1.03	*	130/126	1.002	18	[1.096]		131/126	1.017	17	1.033	*	129/127	0.986	18	1.033		130/127	0.974	18	[1.092]		131/127	0.972	18	1.038	*	129/128	1.002	18	1.028		130/128	0.981
893	gi|363738478	PREDICTED: 5~-nucleotidase domain-containing protein 2 [Gallus gallus]	370	73409	15	15	6	6	13.8	7.31	0.36	Quantitation summary for protein	129/126	1.329	15	1.104	*	130/126	0.943	15	1.117		131/126	1.096	15	1.104	*	129/127	1.169	15	1.111	*	130/127	0.847	15	1.153	*	131/127	1.02	14	1.094		129/128	1.071	15	1.089	*	130/128	0.771
894	gi|363746209	PREDICTED: alpha-sarcoglycan-like [Gallus gallus]	370	24333	17	15	2	2	7.9	5.4	0.29	Quantitation summary for protein	129/126	1.174	16	1.033	*	130/126	1.097	16	1.04	*	131/126	1.207	16	1.034	*	129/127	1.428	16	[1.067]		130/127	1.361	16	1.045	*	131/127	1.482	16	[1.051]		129/128	1.272	16	1.026	*	130/128	1.205
895	gi|117807	RecName: Full=Cytochrome b5	369	16681	21	17	5	4	39.9	5.07	1.1	Quantitation summary for protein	129/126	0.82	7	1.016	*	130/126	0.578	7	[1.219]		131/126	0.615	7	[1.212]		129/127	1.081	7	1.053	*	130/127	0.777	7	[1.194]		131/127	0.818	7	[1.187]		129/128	0.838	7	1.05	*	130/128	0.598
896	gi|53134189	hypothetical protein RCJMB04_22m12 [Gallus gallus]	369	35507	24	17	9	6	30.8	8.69	1.44	Quantitation summary for protein	129/126	1.084	23	1.034	*	130/126	0.975	23	1.079		131/126	0.98	22	1.044	*	129/127	1.144	23	1.031	*	130/127	1.05	23	1.086	*	131/127	1.092	23	[1.057]		129/128	0.882	23	1.037	*	130/128	0.805
897	gi|289800	initiation factor 5A [Gallus gallus]	369	20432	41	30	4	3	25.5	5.37	1.91	Quantitation summary for protein	129/126	1.227	3	1.077	*	130/126	1.064	3	1.05		131/126	1.17	3	1.083		129/127	1.243	3	1.019	*	130/127	1.101	3	1.029	*	131/127	1.198	3	1.106		129/128	1.06	3	1.016	*	130/128	0.933
898	gi|994710	mitogen-activated protein kinase kinase type 2 [Gallus gallus]	369	50522	17	15	6	5	18.6	6.24	0.56	Quantitation summary for protein	129/126	0.896	3	1.097		130/126	0.819	3	1.123		131/126	0.795	3	1.099		129/127	1.068	3	1.048		130/127	0.996	3	1.055		131/127	0.957	3	1.126		129/128	0.924	3	1.116		130/128	0.856
899	gi|363738498	PREDICTED: putative RNA-binding protein 15B [Gallus gallus]	366	100529	18	16	4	3	4.7	9.32	0.14	Quantitation summary for protein	129/126	1.399	17	1.053	*	130/126	1.075	17	[1.061]		131/126	1.196	17	1.041	*	129/127	1.458	17	1.055	*	130/127	1.144	17	[1.053]		131/127	1.259	17	[1.042]		129/128	0.979	17	1.056		130/128	0.764
900	gi|17127730	extracellular signal-regulated kinase 2 [Gallus gallus]	366	47815	21	17	8	8	18.2	6.5	0.82	Quantitation summary for protein	129/126	0.94	20	[1.067]		130/126	1.003	20	[1.085]		131/126	0.898	20	1.063	*	129/127	0.94	20	[1.042]		130/127	1.024	20	[1.108]		131/127	0.908	20	[1.076]		129/128	1.076	20	1.029	*	130/128	1.165
901	gi|118089191	PREDICTED: chloride intracellular channel protein 5 [Gallus gallus]	366	50892	15	15	5	5	16.5	4.89	0.55	Quantitation summary for protein	129/126	0.91	15	1.069	*	130/126	0.83	15	1.116	*	131/126	0.859	15	1.123	*	129/127	0.935	15	1.038	*	130/127	0.87	15	1.162	*	131/127	0.891	15	1.164	*	129/128	1.009	15	[1.085]		130/128	0.933
902	gi|633042	Catalytic subunit of chicken gizzard type-1 delta protein phosphatase [Gallus gallus]	365	42544	25	18	10	8	30.3	5.84	1.28	Quantitation summary for protein	129/126	1.109	6	1.089	*	130/126	1.093	6	1.096		131/126	1.007	6	1.069		129/127	0.965	6	1.034	*	130/127	0.971	6	1.12		131/127	0.885	6	1.076	*	129/128	1.038	6	1.148		130/128	1.038
903	gi|118595754	RecName: Full=Myoglobin	364	22223	17	14	6	4	41.6	7.96	2.08	Quantitation summary for protein	129/126	0.708	15	[1.097]		130/126	1.439	14	1.086	*	131/126	0.768	15	1.139	*	129/127	0.742	15	[1.084]		130/127	1.58	15	1.112	*	131/127	0.822	14	1.096	*	129/128	0.861	15	[1.072]		130/128	1.822
904	gi|8163560	vacuolar H-ATPase B subunit osteoclast isozyme, partial [Gallus gallus]	363	60399	20	12	8	6	21	5.5	0.45	Quantitation summary for protein	129/126	1.013	12	1.045		130/126	1.018	14	1.104		131/126	1.176	14	1.082	*	129/127	0.991	13	1.062		130/127	1.024	14	1.113		131/127	1.171	14	1.093	*	129/128	1.037	14	1.05	*	130/128	1.062
905	gi|45826443	NADH dehydrogenase B14.5b chain [Gallus gallus]	362	12168	19	16	3	1	26	9.21	1.69	Quantitation summary for protein	129/126	0.88	19	1.053	*	130/126	0.92	19	1.027	*	131/126	0.839	19	1.047	*	129/127	0.971	19	1.033	*	130/127	1.037	19	1.033	*	131/127	0.936	19	1.029	*	129/128	1.012	19	1.038		130/128	1.074
906	gi|363745195	PREDICTED: transcription factor BTF3-like [Gallus gallus]	362	37948	28	21	4	4	23.3	8.58	0.65	Quantitation summary for protein	129/126	0.427	2	1.186		130/126	0.408	2	1.194		131/126	0.472	2	1.13		129/127	0.758	2	1.047		130/127	0.739	2	1.04		131/127	0.845	2	1.403		129/128	0.453	2	1.116		130/128	0.439
907	gi|515838	single stranded D box binding factor [Gallus gallus]	362	38831	15	9	5	4	19.2	8.62	0.63	Quantitation summary for protein	129/126	1.418	12	[1.078]		130/126	1.079	12	[1.096]		131/126	1.346	12	[1.099]		129/127	1.037	11	1.039	*	130/127	0.912	10	1.04	*	131/127	0.997	12	[1.056]		129/128	1.043	12	1.025	*	130/128	0.805
908	gi|53133626	hypothetical protein RCJMB04_18l12 [Gallus gallus]	362	55204	15	12	7	6	16.1	6.32	0.5	Quantitation summary for protein	129/126	0.931	14	[1.045]		130/126	0.84	14	1.06	*	131/126	0.763	13	1.051	*	129/127	1	14	[1.043]		130/127	0.921	14	1.04	*	131/127	0.831	14	1.063	*	129/128	1.13	14	1.038	*	130/128	1.034
909	gi|60098597	hypothetical protein RCJMB04_3o20 [Gallus gallus]	361	19404	13	11	6	4	47.4	6.74	3.21	Quantitation summary for protein	129/126	0.988	12	[1.088]		130/126	0.899	12	1.093	*	131/126	0.946	12	1.089	*	129/127	1.104	12	1.085	*	130/127	1.025	12	1.105		131/127	1.067	12	[1.129]		129/128	1.016	12	1.06		130/128	0.938
910	gi|6435829	synemin [Gallus gallus]	360	207285	15	15	7	7	5.2	5	0.12	Quantitation summary for protein	129/126	1.369	15	1.114	*	130/126	1.241	15	1.061	*	131/126	1.138	15	[1.081]		129/127	0.955	15	1.063	*	130/127	0.884	15	1.124	*	131/127	0.802	15	1.105	*	129/128	0.85	15	1.035	*	130/128	0.782
911	gi|118099442	PREDICTED: erythrocyte band 7 integral membrane protein [Gallus gallus]	360	34689	16	13	7	6	30.2	6.75	0.73	Quantitation summary for protein	129/126	0.937	13	[1.053]		130/126	1.051	13	1.059	*	131/126	0.947	13	1.049	*	129/127	0.723	13	1.072	*	130/127	0.828	13	1.08	*	131/127	0.738	13	1.071	*	129/128	1.021	13	1.033	*	130/128	1.162
912	gi|118087111	PREDICTED: inositol monophosphatase 1 [Gallus gallus]	359	34991	16	14	6	6	20.5	5.51	1.26	Quantitation summary for protein	129/126	0.931	16	1.038	*	130/126	0.76	16	1.113	*	131/126	0.849	16	[1.112]		129/127	1.11	16	1.057	*	130/127	0.925	16	1.142	*	131/127	1.022	16	[1.140]		129/128	1.002	16	1.049		130/128	0.83
913	gi|349732149	pantothenate kinase 4 [Gallus gallus]	359	100156	16	14	7	6	9.1	6.18	0.25	Quantitation summary for protein	129/126	0.856	15	1.052	*	130/126	0.826	15	1.073	*	131/126	0.818	15	1.09	*	129/127	0.912	15	1.047	*	130/127	0.899	15	1.055	*	131/127	0.88	15	1.069	*	129/128	1.001	15	1.052		130/128	0.98
914	gi|118084007	PREDICTED: uncharacterized protein LOC771780 [Gallus gallus]	358	12397	10	9	2	2	18.2	9.01	1.08	Quantitation summary for protein	129/126	1.384	9	1.037	*	130/126	1.83	9	1.088	*	131/126	1.043	9	1.043	*	129/127	1.246	9	1.042	*	130/127	1.682	9	1.073	*	131/127	0.949	9	1.046	*	129/128	1.143	9	1.052	*	130/128	1.533
915	gi|53130402	hypothetical protein RCJMB04_7i6 [Gallus gallus]	357	47786	15	14	3	3	10.7	8.11	0.22	Quantitation summary for protein	129/126	1.021	14	1.045		130/126	1.027	14	1.034	*	131/126	0.946	14	[1.042]		129/127	0.958	14	1.032	*	130/127	0.984	14	1.058		131/127	0.897	14	1.027	*	129/128	1.125	14	1.037	*	130/128	1.149
916	gi|161513291	immunoglobulin heavy chain variable region [Gallus gallus]	357	13891	7	7	2	2	21.1	9.04	0.93	Quantitation summary for protein	129/126	---	0	---		130/126	---	0	---		131/126	---	0	---		129/127	---	0	---		130/127	---	0	---		131/127	---	0	---		129/128	---	0	---		130/128	---
917	gi|363732251	PREDICTED: glutathione S-transferase-like [Gallus gallus]	357	30477	21	19	7	6	38	7.85	0.86	Quantitation summary for protein	129/126	0.817	2	1.008	*	130/126	0.718	2	1.004	*	131/126	0.763	2	1.161		129/127	0.979	2	1.153		130/127	0.877	2	1.138		131/127	0.922	2	1.016		129/128	0.816	2	1.029		130/128	0.727
918	gi|5853305	protein serine/threonine kinase [Gallus gallus]	356	31244	13	11	5	4	23.2	4.92	0.5	Quantitation summary for protein	129/126	0.986	11	[1.072]		130/126	0.741	11	1.098	*	131/126	0.78	11	1.063	*	129/127	0.998	11	[1.071]		130/127	0.766	11	1.116	*	131/127	0.797	11	1.088	*	129/128	0.982	11	1.029		130/128	0.748
919	gi|161513287	immunoglobulin heavy chain variable region [Gallus gallus]	356	13704	15	12	3	3	25.4	6.81	2.05	Quantitation summary for protein	129/126	---	0	---		130/126	---	0	---		131/126	---	0	---		129/127	---	0	---		130/127	---	0	---		131/127	---	0	---		129/128	---	0	---		130/128	---
920	gi|53130802	hypothetical protein RCJMB04_10d1 [Gallus gallus]	355	62477	21	16	8	8	17.5	6.15	0.51	Quantitation summary for protein	129/126	0.831	17	1.032	*	130/126	0.893	17	[1.071]		131/126	0.868	17	1.071	*	129/127	0.932	16	1.013	*	130/127	1.013	17	1.065		131/127	0.975	17	1.05		129/128	0.881	17	1.04	*	130/128	0.96
921	gi|118103939	PREDICTED: transportin-1 [Gallus gallus]	355	113086	21	13	8	6	11.3	4.87	0.29	Quantitation summary for protein	129/126	1.178	21	1.056	*	130/126	0.941	21	[1.089]		131/126	0.96	21	[1.093]		129/127	1.024	21	1.044	*	130/127	0.835	21	1.09	*	131/127	0.843	21	1.093	*	129/128	1.275	21	[1.057]		130/128	1.034
922	gi|293632001	NADH dehydrogenase ubiquinone 1 alpha subcomplex 12 transcript variant 1 [Gallus gallus]	353	19918	19	14	5	5	32.2	9.57	1.19	Quantitation summary for protein	129/126	0.961	18	1.028	*	130/126	1.163	18	1.039	*	131/126	0.887	19	1.06	*	129/127	0.866	18	1.022	*	130/127	0.968	19	[1.055]		131/127	0.797	19	[1.064]		129/128	0.75	19	1.032	*	130/128	0.775
923	gi|60098743	hypothetical protein RCJMB04_7k22 [Gallus gallus]	352	75107	15	13	7	6	11	8.42	0.29	Quantitation summary for protein	129/126	1.412	14	1.047	*	130/126	0.759	14	[1.143]		131/126	1.217	13	1.05	*	129/127	1.058	14	1.056	*	130/127	0.58	14	1.158	*	131/127	0.879	14	1.06	*	129/128	1.072	14	1.05	*	130/128	0.584
924	gi|118094652	PREDICTED: thioredoxin domain-containing protein 12 [Gallus gallus]	351	22674	22	17	4	3	21.8	5.51	0.74	Quantitation summary for protein	129/126	0.926	22	[1.061]		130/126	1.295	22	1.052	*	131/126	1.266	22	[1.055]		129/127	0.9	22	[1.053]		130/127	1.36	21	1.036	*	131/127	1.242	22	[1.042]		129/128	0.917	22	[1.039]		130/128	1.301
925	gi|363735650	PREDICTED: synaptopodin 2-like [Gallus gallus]	350	132211	15	14	4	4	4.5	9.48	0.13	Quantitation summary for protein	129/126	1.181	14	1.095	*	130/126	1.39	14	1.089	*	131/126	1.53	14	1.076	*	129/127	1.192	14	1.1	*	130/127	1.356	13	1.076	*	131/127	1.488	13	1.058	*	129/128	1.042	14	1.1		130/128	1.183
926	gi|93209536	GTP-binding protein [Gallus gallus]	349	27027	20	16	8	7	37	5.42	1.26	Quantitation summary for protein	129/126	1.03	16	1.024	*	130/126	0.952	17	1.027	*	131/126	0.819	17	1.03	*	129/127	0.98	17	1.027	*	130/127	0.954	17	1.039	*	131/127	0.812	17	1.041	*	129/128	1.249	17	1.037	*	130/128	1.208
927	gi|60099215	hypothetical protein RCJMB04_34p20 [Gallus gallus]	348	18680	14	13	2	2	13.8	12.05	0.65	Quantitation summary for protein	129/126	1.92	13	1.077	*	130/126	1.384	13	[1.035]		131/126	1.423	13	1.032	*	129/127	0.965	14	1.033	*	130/127	0.718	14	1.041	*	131/127	0.732	14	[1.044]		129/128	1.103	14	1.04	*	130/128	0.815
928	gi|363734030	PREDICTED: protein-L-isoaspartate(D-aspartate) O-methyltransferase [Gallus gallus]	348	31152	22	18	8	6	31	6.38	1.25	Quantitation summary for protein	129/126	0.992	19	1.065		130/126	1.057	19	1.094	*	131/126	1.102	19	1.053	*	129/127	0.993	19	1.054		130/127	1.08	19	1.126	*	131/127	1.114	19	[1.083]		129/128	0.891	19	1.042	*	130/128	0.964
929	gi|118097028	PREDICTED: NEDD8-activating enzyme E1 catalytic subunit isoform 2 [Gallus gallus]	347	55581	10	8	5	4	17.1	5.2	0.5	Quantitation summary for protein	129/126	0.978	10	1.091		130/126	0.89	10	1.057	*	131/126	0.91	10	[1.122]		129/127	1.154	10	1.049	*	130/127	1.072	10	1.068	*	131/127	1.125	9	1.064	*	129/128	1.158	10	1.051	*	130/128	1.069
930	gi|63781	ribosomal protein S17 (AA 7-135) [Gallus gallus]	347	18093	14	9	6	4	55	9.64	2.31	Quantitation summary for protein	129/126	1.254	12	1.084	*	130/126	1.172	12	1.115	*	131/126	1.118	12	1.116	*	129/127	0.945	12	[1.096]		130/127	0.902	12	1.065	*	131/127	0.851	12	1.064	*	129/128	0.963	12	[1.075]		130/128	1.053
931	gi|53127734	hypothetical protein RCJMB04_3c21 [Gallus gallus]	347	39091	12	11	6	6	22.3	5.31	0.63	Quantitation summary for protein	129/126	0.953	12	1.062	*	130/126	1.094	12	1.083	*	131/126	1.033	12	1.065		129/127	1.131	12	1.054	*	130/127	1.326	12	1.12	*	131/127	1.238	12	1.085	*	129/128	1.15	12	1.062	*	130/128	1.34
932	gi|53136838	hypothetical protein RCJMB04_34n7 [Gallus gallus]	346	31098	19	17	8	7	36.6	4.73	1.25	Quantitation summary for protein	129/126	1.169	19	[1.100]		130/126	1.281	19	1.09	*	131/126	1.165	19	[1.072]		129/127	1.038	18	1.031	*	130/127	1.158	19	1.109	*	131/127	1.042	19	1.069	*	129/128	1.038	19	1.047	*	130/128	1.153
933	gi|53127364	hypothetical protein RCJMB04_2a5 [Gallus gallus]	344	48881	11	10	4	4	12.5	7.12	0.39	Quantitation summary for protein	129/126	0.991	11	1.034		130/126	0.869	11	1.031	*	131/126	1.149	11	1.07	*	129/127	1.169	11	1.055	*	130/127	1.046	11	1.043	*	131/127	1.369	11	1.058	*	129/128	1.107	11	1.037	*	130/128	0.983
934	gi|363727371	PREDICTED: serine/threonine-protein phosphatase 6 regulatory subunit 2 [Gallus gallus]	343	115069	9	9	3	3	4.4	4.47	0.09	Quantitation summary for protein	129/126	1.169	9	[1.176]		130/126	1.08	9	1.075	*	131/126	1.213	9	1.081	*	129/127	0.89	9	[1.111]		130/127	0.839	9	[1.275]		131/127	0.932	9	[1.249]		129/128	1.132	9	[1.104]		130/128	1.061
935	gi|53130516	hypothetical protein RCJMB04_8f10 [Gallus gallus]	343	35054	18	15	4	4	14.3	5.92	0.72	Quantitation summary for protein	129/126	1.293	10	[1.040]		130/126	0.823	10	1.057	*	131/126	0.831	10	1.082	*	129/127	1.362	9	1.026	*	130/127	0.845	10	1.066	*	131/127	0.844	10	1.092	*	129/128	1.327	9	1.027	*	130/128	0.821
936	gi|363746309	PREDICTED: transcription elongation factor B polypeptide 2-like, partial [Gallus gallus]	343	6758	16	15	3	3	53.3	9.69	4.43	Quantitation summary for protein	129/126	1.032	16	[1.018]		130/126	0.998	16	1.023		131/126	0.968	16	1.016	*	129/127	1.019	16	1.02	*	130/127	1.006	16	1.022		131/127	0.965	16	1.016	*	129/128	0.979	16	1.016	*	130/128	0.96
937	gi|53127342	hypothetical protein RCJMB04_1o9 [Gallus gallus]	343	58922	23	18	8	5	17.4	6.66	0.54	Quantitation summary for protein	129/126	0.961	7	1.05		130/126	1.025	6	1.047		131/126	0.954	7	1.059		129/127	0.962	7	1.067		130/127	0.984	7	1.121		131/127	0.964	7	1.094		129/128	1.025	7	1.051		130/128	1.042
938	gi|363730292	PREDICTED: cullin-1 [Gallus gallus]	342	106131	17	13	6	5	9.1	8.19	0.16	Quantitation summary for protein	129/126	1.039	13	1.052	*	130/126	1.031	13	1.053		131/126	0.929	13	1.057	*	129/127	1.023	12	1.02	*	130/127	1.013	13	1.049		131/127	0.872	12	1.026	*	129/128	1.228	13	1.026	*	130/128	1.237
939	gi|1184955	CLE7 [Gallus gallus]	342	32299	10	10	5	5	25.1	6.01	0.8	Quantitation summary for protein	129/126	1.225	10	1.131	*	130/126	1.483	10	1.343	*	131/126	1.254	10	1.12	*	129/127	0.955	10	1.098		130/127	1.18	10	1.265		131/127	0.987	10	1.093		129/128	0.832	10	1.084	*	130/128	1.022
940	gi|50732421	PREDICTED: phosphotriesterase-related protein [Gallus gallus]	341	44473	21	13	6	3	14.6	6.1	0.43	Quantitation summary for protein	129/126	1.024	14	1.036	*	130/126	0.731	14	1.114	*	131/126	0.824	14	1.088	*	129/127	1.043	14	1.035	*	130/127	0.759	14	1.095	*	131/127	0.848	14	1.059	*	129/128	0.89	14	1.039	*	130/128	0.644
941	gi|363742430	PREDICTED: adenylyl cyclase-associated protein 1 [Gallus gallus]	339	66834	20	16	8	7	13.8	8.2	0.54	Quantitation summary for protein	129/126	1.212	16	1.039	*	130/126	0.827	16	1.061	*	131/126	1.068	16	1.044	*	129/127	1.192	16	1.039	*	130/127	0.83	16	1.061	*	131/127	1.061	16	1.034	*	129/128	1.101	16	1.019	*	130/128	0.762
942	gi|53133808	hypothetical protein RCJMB04_20j11 [Gallus gallus]	339	50420	27	19	14	11	36.4	8.62	1.14	Quantitation summary for protein	129/126	0.969	20	1.037	*	130/126	1.033	21	1.076		131/126	1.091	21	1.061	*	129/127	0.951	21	1.028	*	130/127	1.009	20	1.047		131/127	1.081	21	1.042	*	129/128	0.982	21	[1.026]		130/128	1.03
943	gi|444299628	nascent polypeptide-associated complex alpha subunit [Gallus gallus]	338	27274	13	12	5	5	28.8	4.56	1	Quantitation summary for protein	129/126	1.077	12	1.049	*	130/126	1.149	13	[1.095]		131/126	1.21	13	1.068	*	129/127	0.999	13	1.061		130/127	1.042	12	1.049	*	131/127	1.073	12	1.035	*	129/128	1.033	13	1.052	*	130/128	1.067
944	gi|50732203	PREDICTED: serine/threonine-protein kinase OSR1 [Gallus gallus]	338	68275	13	12	6	6	13.9	5.97	0.33	Quantitation summary for protein	129/126	0.906	11	1.065	*	130/126	0.909	11	[1.077]		131/126	0.798	11	1.067	*	129/127	1.083	11	[1.071]		130/127	1.109	11	[1.071]		131/127	0.963	11	[1.061]		129/128	1.065	11	1.046	*	130/128	1.084
945	gi|118093746	PREDICTED: actin-related protein 2/3 complex subunit 2 [Gallus gallus]	338	41139	25	17	9	5	25.3	6.84	0.59	Quantitation summary for protein	129/126	1.174	17	1.025	*	130/126	0.989	17	[1.084]		131/126	1.077	17	1.069	*	129/127	1.115	17	1.023	*	130/127	0.959	17	1.082	*	131/127	1.033	17	[1.058]		129/128	1.06	17	1.029	*	130/128	0.906
946	gi|53131063	hypothetical protein RCJMB04_11c19 [Gallus gallus]	337	22942	14	7	6	3	38	4.4	0.97	Quantitation summary for protein	129/126	0.984	11	1.067		130/126	0.962	11	1.187		131/126	0.805	11	[1.146]		129/127	0.942	11	1.047	*	130/127	0.94	11	1.181		131/127	0.779	11	1.133	*	129/128	0.934	11	[1.041]		130/128	0.927
947	gi|53127646	hypothetical protein RCJMB04_2n5 [Gallus gallus]	337	48879	17	14	7	7	21.2	5.27	0.58	Quantitation summary for protein	129/126	1.015	15	1.053		130/126	1.068	15	1.063	*	131/126	1.1	15	1.047	*	129/127	0.998	15	1.034		130/127	1.072	15	[1.087]		131/127	1.092	15	[1.068]		129/128	1.004	15	1.042		130/128	1.072
948	gi|53136716	hypothetical protein RCJMB04_32n8 [Gallus gallus]	337	30267	20	13	8	4	33.3	7.03	1.07	Quantitation summary for protein	129/126	1.164	14	1.112	*	130/126	0.931	14	1.126	*	131/126	1.092	14	1.096	*	129/127	1.035	14	1.101		130/127	0.845	14	1.101	*	131/127	0.952	13	1.063	*	129/128	0.897	14	[1.065]		130/128	0.728
949	gi|363728789	PREDICTED: 60S ribosomal protein L8 [Gallus gallus]	336	34650	17	14	6	5	21.4	10.96	0.58	Quantitation summary for protein	129/126	1.874	15	1.112	*	130/126	1.529	15	1.172	*	131/126	1.474	15	1.163	*	129/127	1.025	15	1.085		130/127	0.854	15	1.16	*	131/127	0.814	15	1.135	*	129/128	1.006	15	1.043		130/128	0.833
950	gi|118082784	PREDICTED: probable ATP-dependent RNA helicase DDX17 [Gallus gallus]	336	81242	18	18	5	5	6.7	8.85	0.27	Quantitation summary for protein	129/126	1.649	6	1.08	*	130/126	1.443	5	1.031	*	131/126	1.553	7	1.122	*	129/127	1.119	7	1.106	*	130/127	0.938	7	[1.119]		131/127	0.993	7	1.147		129/128	1.093	7	1.08	*	130/128	0.911
951	gi|118103279	PREDICTED: cartilage oligomeric matrix protein [Gallus gallus]	335	92940	19	13	4	3	4.7	4.27	0.15	Quantitation summary for protein	129/126	1.417	15	[1.032]		130/126	1.035	15	[1.074]		131/126	4.43	15	[1.130]		129/127	1.117	15	1.02	*	130/127	0.833	15	[1.076]		131/127	3.526	15	[1.114]		129/128	1.2	15	1.029	*	130/128	0.889
952	gi|53130830	hypothetical protein RCJMB04_10e23 [Gallus gallus]	335	31659	32	19	10	8	41.2	7.74	1.46	Quantitation summary for protein	129/126	1.081	20	1.027	*	130/126	0.901	21	1.046	*	131/126	1.032	21	[1.027]		129/127	1.057	21	1.037	*	130/127	0.905	21	1.049	*	131/127	1.027	21	1.027	*	129/128	1.049	21	1.041	*	130/128	0.893
953	gi|363743586	PREDICTED: LOW QUALITY PROTEIN: alanyl-tRNA editing protein Aarsd1 [Gallus gallus]	335	69272	12	10	5	5	13	5.44	0.32	Quantitation summary for protein	129/126	0.844	12	1.068	*	130/126	0.953	12	1.1		131/126	0.917	12	1.09	*	129/127	0.899	12	1.114	*	130/127	1.025	11	1.12		131/127	0.987	12	1.151		129/128	0.952	12	1.077	*	130/128	1.08
954	gi|14269537	liver fatty acid binding protein [Gallus gallus]	335	18193	14	11	6	4	45.7	7.74	1.77	Quantitation summary for protein	129/126	0.314	12	1.353	*	130/126	0.3	12	1.303	*	131/126	0.282	12	1.272	*	129/127	0.699	12	1.175	*	130/127	0.683	12	1.144	*	131/127	0.636	12	1.117	*	129/128	0.255	12	1.356	*	130/128	0.247
955	gi|363740917	PREDICTED: 39S ribosomal protein L12, mitochondrial [Gallus gallus]	334	25254	21	19	4	4	21.6	9.66	0.64	Quantitation summary for protein	129/126	0.908	19	1.045	*	130/126	1.321	19	1.078	*	131/126	1.389	19	1.059	*	129/127	0.826	19	1.045	*	130/127	1.226	19	[1.091]		131/127	1.275	19	1.069	*	129/128	0.924	19	1.042	*	130/128	1.364
956	gi|50744860	PREDICTED: kelch-like protein 31 [Gallus gallus]	334	80405	24	15	9	6	14.2	6.48	0.43	Quantitation summary for protein	129/126	1.682	21	1.052	*	130/126	1.502	21	[1.044]		131/126	1.22	21	1.047	*	129/127	0.745	21	1.036	*	130/127	0.679	21	1.073	*	131/127	0.546	21	1.079	*	129/128	0.936	21	1.025	*	130/128	0.848
957	gi|53132103	hypothetical protein RCJMB04_12m17 [Gallus gallus]	333	55560	14	12	4	4	13.2	7.94	0.33	Quantitation summary for protein	129/126	1.091	14	1.115	*	130/126	0.989	14	[1.120]		131/126	1.062	13	1.057	*	129/127	1.043	14	1.056	*	130/127	0.965	14	[1.053]		131/127	1.033	13	1.058		129/128	1.177	14	1.028	*	130/128	1.082
958	gi|53136422	hypothetical protein RCJMB04_28m8 [Gallus gallus]	332	21322	20	11	8	6	64.2	8.71	2.73	Quantitation summary for protein	129/126	1.03	13	[1.097]		130/126	0.917	13	1.06	*	131/126	0.938	13	1.063	*	129/127	0.934	13	1.066	*	130/127	0.849	13	1.1	*	131/127	0.859	13	1.099	*	129/128	0.928	13	1.032	*	130/128	0.839
959	gi|363730452	PREDICTED: eukaryotic translation elongation factor 1 epsilon-1 [Gallus gallus]	332	22720	10	10	5	5	29.3	8.78	0.99	Quantitation summary for protein	129/126	1.067	10	1.117		130/126	1.068	10	1.082	*	131/126	1.107	10	1.1	*	129/127	0.846	10	1.134	*	130/127	0.865	10	1.051	*	131/127	0.886	10	1.07	*	129/128	0.921	10	1.043	*	130/128	0.936
960	gi|68139265	5~-AMP-activated protein kinase gamma-3 non-catalytic subunit long form [Gallus gallus]	332	47170	16	15	5	4	12.3	5.74	0.4	Quantitation summary for protein	129/126	0.96	9	1.11		130/126	0.983	9	1.042		131/126	0.847	9	1.132	*	129/127	0.84	9	1.057	*	130/127	0.878	9	1.113	*	131/127	0.748	9	1.053	*	129/128	0.891	9	1.059	*	130/128	0.926
961	gi|460838680	prefoldin subunit 1 isoform 1 [Gallus gallus]	332	17880	18	13	4	4	29.5	7.93	1.38	Quantitation summary for protein	129/126	0.963	14	1.056	*	130/126	0.894	14	1.069	*	131/126	1.007	14	1.068		129/127	0.98	14	1.038		130/127	0.928	14	1.06	*	131/127	1.035	14	1.054	*	129/128	0.919	14	1.019	*	130/128	0.865
962	gi|53132882	hypothetical protein RCJMB04_14b8 [Gallus gallus]	332	69367	21	14	6	3	12.6	8.36	0.26	Quantitation summary for protein	129/126	0.908	19	1.025	*	130/126	0.902	19	[1.040]		131/126	0.878	19	1.029	*	129/127	1.007	19	1.023		130/127	1.017	18	1.026	*	131/127	0.984	19	[1.033]		129/128	0.955	17	1.013	*	130/128	0.962
963	gi|212634	insulinoma protein (rig) [Gallus gallus]	331	20925	27	18	2	2	17.2	10.39	1.1	Quantitation summary for protein	129/126	1.149	26	[1.064]		130/126	1.072	26	1.059	*	131/126	1.109	26	1.056	*	129/127	0.829	26	[1.048]		130/127	0.789	26	[1.084]		131/127	0.807	26	[1.080]		129/128	0.864	26	[1.047]		130/128	0.817
964	gi|53132198	hypothetical protein RCJMB04_13a8 [Gallus gallus]	331	23462	28	16	4	4	18.3	9.16	1.23	Quantitation summary for protein	129/126	0.967	25	[1.055]		130/126	0.914	25	[1.051]		131/126	0.919	25	1.065	*	129/127	0.957	24	1.027	*	130/127	0.923	25	1.044	*	131/127	0.917	25	1.039	*	129/128	0.999	25	[1.041]		130/128	0.958
965	gi|363740188	PREDICTED: LOW QUALITY PROTEIN: oxysterol-binding protein 2 [Gallus gallus]	331	103038	16	15	5	5	6.4	6.52	0.24	Quantitation summary for protein	129/126	0.98	11	1.082		130/126	0.93	11	1.105	*	131/126	0.958	11	[1.119]		129/127	0.908	11	1.066	*	130/127	0.879	11	1.078	*	131/127	0.892	10	1.077	*	129/128	1.032	10	1.039	*	130/128	0.996
966	gi|53130736	hypothetical protein RCJMB04_9m8 [Gallus gallus]	331	46322	12	10	4	3	12	5.82	0.41	Quantitation summary for protein	129/126	1.065	12	1.054	*	130/126	0.865	12	1.065	*	131/126	1.051	12	1.036	*	129/127	0.989	11	1.051		130/127	0.933	12	1.056	*	131/127	1.122	12	1.072	*	129/128	1.089	12	[1.052]		130/128	0.898
967	gi|363746007	PREDICTED: glycogen [starch] synthase, muscle, partial [Gallus gallus]	330	26109	25	20	5	4	21	5.92	1.62	Quantitation summary for protein	129/126	0.974	14	1.112		130/126	1.335	14	1.191	*	131/126	1.024	14	1.143		129/127	0.797	14	1.087	*	130/127	1.115	14	1.224		131/127	0.846	14	1.178	*	129/128	1.02	14	1.099		130/128	1.418
968	gi|118084838	PREDICTED: N-alpha-acetyltransferase 16, NatA auxiliary subunit [Gallus gallus]	329	121828	20	16	12	8	12.6	8.16	0.27	Quantitation summary for protein	129/126	1.004	15	1.035		130/126	0.983	15	[1.097]		131/126	0.957	15	1.064	*	129/127	1.021	15	[1.040]		130/127	1.02	15	1.104		131/127	0.982	15	[1.070]		129/128	1.161	15	[1.044]		130/128	1.153
969	gi|363737146	PREDICTED: UDP-glucose:glycoprotein glucosyltransferase 1 [Gallus gallus]	329	198409	21	12	10	4	6.8	5.32	0.1	Quantitation summary for protein	129/126	0.956	15	1.024	*	130/126	0.878	15	[1.099]		131/126	0.931	13	1.049	*	129/127	0.923	15	1.033	*	130/127	0.865	15	[1.108]		131/127	0.903	14	1.065	*	129/128	1.006	15	1.045		130/128	0.937
970	gi|363741140	PREDICTED: 60S ribosomal protein L23a [Gallus gallus]	329	24749	13	11	4	4	25.2	10.44	0.88	Quantitation summary for protein	129/126	1.717	13	1.085	*	130/126	1.479	13	1.075	*	131/126	1.605	13	1.095	*	129/127	1.139	12	1.036	*	130/127	1.002	13	1.064		131/127	1.074	12	1.055	*	129/128	1.098	13	[1.076]		130/128	0.959
971	gi|363744767	PREDICTED: 40S ribosomal protein S23 [Gallus gallus]	329	20781	15	13	4	3	25.2	10.5	0.82	Quantitation summary for protein	129/126	1.264	14	1.041	*	130/126	1.145	14	1.056	*	131/126	1.119	14	[1.056]		129/127	0.976	14	1.027	*	130/127	0.902	14	1.081	*	131/127	0.872	14	1.04	*	129/128	0.991	14	1.028		130/128	0.91
972	gi|12381877	ribosomal protein L35 [Gallus gallus]	329	20730	20	13	6	4	32.5	11.04	1.46	Quantitation summary for protein	129/126	1.482	15	[1.044]		130/126	1.291	15	[1.058]		131/126	1.368	15	1.041	*	129/127	1.009	15	1.04		130/127	0.897	15	[1.068]		131/127	0.941	15	1.058	*	129/128	1.024	15	1.021	*	130/128	0.905
973	gi|53133498	hypothetical protein RCJMB04_17e23 [Gallus gallus]	329	57614	11	8	4	2	8.4	5.93	0.25	Quantitation summary for protein	129/126	1.131	9	1.064	*	130/126	1.028	9	1.087		131/126	0.962	9	1.055		129/127	1.083	9	1.061	*	130/127	1.005	9	1.075		131/127	0.93	9	1.058	*	129/128	0.923	9	1.087	*	130/128	0.864
974	gi|50810900	PREDICTED: coiled-coil domain-containing protein 124 [Gallus gallus]	328	33049	17	15	6	5	29.4	9.44	0.61	Quantitation summary for protein	129/126	0.898	14	1.037	*	130/126	1.055	15	1.099	*	131/126	1.206	15	1.052	*	129/127	1.14	15	1.054	*	130/127	1.371	15	1.11	*	131/127	1.549	15	1.063	*	129/128	0.766	15	1.051	*	130/128	0.915
975	gi|53131507	hypothetical protein RCJMB04_11n24 [Gallus gallus]	328	62803	17	14	5	4	12.2	8.85	0.23	Quantitation summary for protein	129/126	1.228	2	1.057		130/126	0.958	2	1.025		131/126	1.08	2	1.038		129/127	1.007	2	1.015		130/127	0.802	2	1.067		131/127	0.894	2	1.003	*	129/128	0.943	2	1.017		130/128	0.747
976	gi|53130246	hypothetical protein RCJMB04_6j20 [Gallus gallus]	328	49070	10	8	3	3	7.9	8.62	0.3	Quantitation summary for protein	129/126	0.998	9	1.045		130/126	0.932	9	1.103		131/126	0.91	9	1.102	*	129/127	1.003	8	1.039		130/127	0.951	9	1.093		131/127	0.924	8	1.083	*	129/128	0.957	9	1.048	*	130/128	0.906
977	gi|26984174	serine-threonine protein phosphatase 2A regulatory subunit [Gallus gallus]	327	57055	18	17	6	6	14.1	5.87	0.4	Quantitation summary for protein	129/126	1.129	17	[1.071]		130/126	1.214	17	1.11	*	131/126	1.068	17	1.055	*	129/127	1.018	17	1.06		130/127	1.117	17	1.111	*	131/127	0.968	16	1.037	*	129/128	1.045	17	1.038	*	130/128	1.139
978	gi|53136602	hypothetical protein RCJMB04_31h14 [Gallus gallus]	327	68518	13	12	5	5	11.1	5.72	0.26	Quantitation summary for protein	129/126	1.169	12	1.066	*	130/126	1.228	12	1.045	*	131/126	1.17	12	1.04	*	129/127	0.891	11	1.046	*	130/127	0.96	12	1.101		131/127	0.905	12	[1.074]		129/128	0.797	11	1.043	*	130/128	0.854
979	gi|118098058	PREDICTED: 40S ribosomal protein S15a isoform 1 [Gallus gallus]	326	17710	26	21	8	8	50.8	10.07	5.79	Quantitation summary for protein	129/126	1.858	23	[1.126]		130/126	1.326	23	1.091	*	131/126	1.243	23	1.079	*	129/127	1.311	23	[1.123]		130/127	0.956	23	[1.078]		131/127	0.886	23	[1.057]		129/128	1.436	23	[1.115]		130/128	1.04
980	gi|63560	unnamed protein product [Gallus gallus]	325	77638	22	20	12	10	17.2	5.31	0.51	Quantitation summary for protein	129/126	1.771	20	[1.089]		130/126	1.512	20	[1.081]		131/126	1.61	19	1.05	*	129/127	0.904	20	[1.022]		130/127	0.788	20	[1.037]		131/127	0.773	20	1.029	*	129/128	0.984	20	1.025	*	130/128	0.853
981	gi|363743615	PREDICTED: mitochondrial import inner membrane translocase subunit Tim13-A-like [Gallus gallus]	325	12835	11	9	4	3	49.5	8.42	1.57	Quantitation summary for protein	129/126	1.049	9	1.097		130/126	1.192	9	[1.093]		131/126	1.276	9	1.048	*	129/127	0.919	9	1.071	*	130/127	1.067	9	1.07	*	131/127	1.13	9	1.084	*	129/128	0.821	9	1.083	*	130/128	0.989
982	gi|363728992	PREDICTED: carbohydrate kinase domain-containing protein [Gallus gallus]	325	64479	25	19	5	2	9.7	6.23	0.16	Quantitation summary for protein	129/126	1.073	20	[1.028]		130/126	0.89	20	1.033	*	131/126	0.988	20	[1.029]		129/127	0.985	20	[1.039]		130/127	0.835	20	1.031	*	131/127	0.916	20	[1.035]		129/128	0.971	20	1.026	*	130/128	0.818
983	gi|363736402	PREDICTED: antithrombin-III [Gallus gallus]	324	59409	26	21	9	8	18.5	5.75	0.62	Quantitation summary for protein	129/126	1.18	23	[1.106]		130/126	0.82	23	1.065	*	131/126	0.727	23	1.063	*	129/127	1.297	23	[1.092]		130/127	0.92	23	1.073	*	131/127	0.807	23	[1.064]		129/128	0.918	23	1.04	*	130/128	0.647
984	gi|118102009	PREDICTED: 40S ribosomal protein S25 [Gallus gallus]	324	20177	21	14	6	4	38.4	10.12	1.52	Quantitation summary for protein	129/126	1.033	17	[1.144]		130/126	1.244	17	1.131	*	131/126	1.272	17	[1.117]		129/127	0.818	17	[1.159]		130/127	1.006	17	1.152		131/127	1.018	17	1.115		129/128	0.962	17	1.073	*	130/128	1.175
985	gi|50758444	PREDICTED: uncharacterized protein LOC417680 [Gallus gallus]	324	16796	13	12	4	3	38.5	5.46	0.74	Quantitation summary for protein	129/126	0.811	12	1.071	*	130/126	0.819	12	[1.045]		131/126	0.89	12	1.032	*	129/127	1.011	12	1.03		130/127	1.042	12	1.084		131/127	1.119	12	[1.072]		129/128	1.038	12	1.035	*	130/128	1.064
986	gi|444741647	endoplasmic reticulum resident protein 29 precursor [Gallus gallus]	321	36538	19	13	7	6	21	7.63	1	Quantitation summary for protein	129/126	1.065	18	[1.048]		130/126	0.898	18	1.067	*	131/126	0.994	18	1.066		129/127	1.06	18	[1.051]		130/127	0.913	18	[1.068]		131/127	0.999	18	1.063		129/128	0.949	18	1.029	*	130/128	0.812
987	gi|16660153	transcriptional coactivator p100 [Gallus gallus]	321	89386	13	11	5	4	10.1	6.03	0.15	Quantitation summary for protein	129/126	1.308	10	1.025	*	130/126	1.027	11	1.064		131/126	1.249	10	1.032	*	129/127	0.923	11	1.037	*	130/127	0.747	11	1.069	*	131/127	0.89	11	[1.064]		129/128	0.951	11	1.03	*	130/128	0.765
988	gi|118083300	PREDICTED: uncharacterized protein LOC418286 [Gallus gallus]	321	13019	12	12	2	2	14.8	4.17	1.02	Quantitation summary for protein	129/126	0.757	12	1.122	*	130/126	2.175	12	[1.374]		131/126	2.002	12	[1.257]		129/127	0.797	12	1.089	*	130/127	2.337	12	[1.425]		131/127	2.128	12	[1.307]		129/128	0.981	12	1.053		130/128	2.858
989	gi|268370287	tubulin-specific chaperone A [Gallus gallus]	319	16479	15	14	5	5	38	5.4	2.08	Quantitation summary for protein	129/126	1.458	14	[1.073]		130/126	1.104	14	1.161	*	131/126	1.347	14	[1.126]		129/127	1.372	14	[1.094]		130/127	1.06	14	1.171		131/127	1.279	14	1.146	*	129/128	1.337	14	1.1	*	130/128	1.027
990	gi|33668025	adipocyte-type fatty acid binding protein [Gallus gallus]	318	7363	9	7	2	1	58	9.37	2.27	Quantitation summary for protein	129/126	0.993	7	1.036		130/126	0.55	7	[1.067]		131/126	0.645	7	1.074	*	129/127	1.424	7	1.067	*	130/127	0.804	7	1.059	*	131/127	0.934	7	1.073	*	129/128	1.284	7	1.044	*	130/128	0.721
991	gi|363734612	PREDICTED: plasma protease C1 inhibitor-like [Gallus gallus]	317	57999	15	14	7	6	17.7	5.73	0.47	Quantitation summary for protein	129/126	1.332	14	[1.081]		130/126	1.121	14	[1.104]		131/126	1.445	14	1.047	*	129/127	1.196	14	[1.066]		130/127	1.027	14	[1.106]		131/127	1.311	14	[1.051]		129/128	1.299	14	[1.090]		130/128	1.109
992	gi|38680347	proteasome subunit beta-type [Gallus gallus]	317	29748	17	16	6	6	27.4	6.43	1.1	Quantitation summary for protein	129/126	1.034	15	1.042	*	130/126	0.981	16	[1.060]		131/126	1.021	16	[1.066]		129/127	1.026	16	[1.052]		130/127	1.005	16	1.045		131/127	1.034	16	1.058	*	129/128	0.916	16	1.033	*	130/128	0.891
993	gi|363740735	PREDICTED: ubiquitin-conjugating enzyme E2 O [Gallus gallus]	317	161492	12	11	6	5	6.1	4.98	0.13	Quantitation summary for protein	129/126	1.01	11	1.076		130/126	0.966	11	1.084		131/126	0.888	11	1.089	*	129/127	1.025	11	1.11		130/127	1.001	11	[1.122]		131/127	0.911	11	1.064	*	129/128	1.119	11	1.1	*	130/128	1.085
994	gi|118101426	PREDICTED: prenylcysteine oxidase [Gallus gallus]	317	62389	16	11	5	4	10.2	7.21	0.43	Quantitation summary for protein	129/126	0.946	13	[1.073]		130/126	0.905	13	1.097	*	131/126	0.99	13	1.085		129/127	0.948	13	[1.059]		130/127	0.925	13	1.13	*	131/127	0.996	12	1.088		129/128	0.867	13	1.072	*	130/128	0.841
995	gi|53136289	hypothetical protein RCJMB04_27j6 [Gallus gallus]	316	20442	26	16	5	4	29.9	5.07	0.84	Quantitation summary for protein	129/126	1.051	17	1.021	*	130/126	1.104	17	[1.047]		131/126	1.095	17	1.035	*	129/127	0.928	17	1.021	*	130/127	0.995	17	[1.043]		131/127	0.977	17	1.031	*	129/128	0.843	17	1.025	*	130/128	0.899
996	gi|363734378	PREDICTED: tumor susceptibility gene 101 protein [Gallus gallus]	316	50627	15	11	5	3	11.5	5.63	0.29	Quantitation summary for protein	129/126	1.182	14	1.021	*	130/126	0.968	14	[1.061]		131/126	1.033	14	[1.047]		129/127	1.082	14	1.034	*	130/127	0.904	14	[1.075]		131/127	0.954	14	[1.059]		129/128	0.998	14	1.04		130/128	0.828
997	gi|118095460	PREDICTED: alpha-protein kinase 3 [Gallus gallus]	315	64359	15	12	7	6	18.8	9.2	0.35	Quantitation summary for protein	129/126	1.43	12	1.067	*	130/126	1.241	12	1.076	*	131/126	1.215	12	1.046	*	129/127	1.072	12	1.051	*	130/127	0.95	12	1.051	*	131/127	0.92	12	[1.073]		129/128	0.999	12	1.044		130/128	0.88
998	gi|60098739	hypothetical protein RCJMB04_7j8 [Gallus gallus]	315	117930	15	12	9	7	10.4	6.63	0.28	Quantitation summary for protein	129/126	1.093	14	1.06	*	130/126	0.991	13	1.065		131/126	1.196	14	1.058	*	129/127	1.158	14	1.051	*	130/127	1.22	14	[1.085]		131/127	1.28	14	1.067	*	129/128	1.28	14	1.037	*	130/128	1.34
999	gi|50745672	PREDICTED: uncharacterized protein LOC422200 [Gallus gallus]	314	20781	12	11	4	4	25	9.71	1.46	Quantitation summary for protein	129/126	0.965	11	1.055		130/126	0.858	11	1.18	*	131/126	0.869	11	1.095	*	129/127	1.086	9	1.028	*	130/127	0.969	11	1.222		131/127	0.971	11	1.136		129/128	0.956	11	1.045	*	130/128	0.862
1000	gi|383087734	ribosome-binding protein 1 [Gallus gallus]	314	138715	22	14	12	9	11.6	5.29	0.26	Quantitation summary for protein	129/126	1.158	16	1.026	*	130/126	0.93	16	1.028	*	131/126	1.202	16	1.02	*	129/127	0.874	16	1.034	*	130/127	0.716	16	1.047	*	131/127	0.916	16	1.027	*	129/128	1.028	16	1.027	*	130/128	0.837
1001	gi|118095251	PREDICTED: kininogen-2 [Gallus gallus]	314	80556	28	22	6	6	8.6	5.74	0.38	Quantitation summary for protein	129/126	1.671	25	[1.095]		130/126	1.275	25	[1.074]		131/126	1.715	25	[1.085]		129/127	0.999	25	1.081		130/127	0.778	25	1.088	*	131/127	1.035	25	1.055	*	129/128	1.332	25	1.068	*	130/128	1.031
1002	gi|118091311	PREDICTED: uncharacterized protein LOC771119 [Gallus gallus]	313	46317	20	15	7	6	18.4	9.87	0.51	Quantitation summary for protein	129/126	1.219	15	1.063	*	130/126	0.844	15	[1.100]		131/126	1.011	15	[1.104]		129/127	1.327	15	1.086	*	130/127	0.937	15	1.083	*	131/127	1.112	15	1.088	*	129/128	0.925	15	1.042	*	130/128	0.649
1003	gi|50751150	PREDICTED: calcyclin-binding protein [Gallus gallus]	313	33483	21	10	6	4	22.6	8.59	0.6	Quantitation summary for protein	129/126	0.976	13	1.039	*	130/126	1.013	13	1.028		131/126	1.009	13	1.034		129/127	1.024	13	1.036	*	130/127	1.084	13	1.046	*	131/127	1.069	13	1.052	*	129/128	0.89	13	1.023	*	130/128	0.937
1004	gi|118089606	PREDICTED: cytochrome c oxidase subunit 7B, mitochondrial-like [Gallus gallus]	313	10060	8	8	1	1	15.2	10.58	0.8	Quantitation summary for protein	129/126	1.423	7	1.036	*	130/126	0.905	8	[1.466]		131/126	0.599	8	1.063	*	129/127	1.495	8	1.086	*	130/127	0.986	8	[1.482]		131/127	0.639	7	1.058	*	129/128	0.824	8	[1.051]		130/128	0.54
1005	gi|363738482	PREDICTED: inter-alpha-trypsin inhibitor heavy chain H3 [Gallus gallus]	313	116604	20	16	6	6	8.5	5.85	0.25	Quantitation summary for protein	129/126	1.647	11	1.097	*	130/126	1.251	12	[1.088]		131/126	1.724	12	1.112	*	129/127	1.406	12	[1.072]		130/127	1.153	12	1.046	*	131/127	1.571	12	[1.056]		129/128	1.414	12	1.069	*	130/128	1.121
1006	gi|53130046	hypothetical protein RCJMB04_6g17 [Gallus gallus]	313	63603	13	10	8	8	17.5	4.8	0.57	Quantitation summary for protein	129/126	1.108	4	1.178		130/126	0.805	4	1.09	*	131/126	0.861	4	1.124		129/127	1.136	4	1.243		130/127	0.842	4	1.156		131/127	0.851	3	1.059	*	129/128	1.109	3	1.015	*	130/128	0.833
1007	gi|363746217	PREDICTED: NADH dehydrogenase [ubiquinone] iron-sulfur protein 2, mitochondrial-like, partial [Gallus gallus]	312	13450	11	10	2	2	17.8	4.96	1.48	Quantitation summary for protein	129/126	0.932	11	1.037	*	130/126	0.966	11	1.092		131/126	0.939	11	[1.076]		129/127	0.962	11	1.032	*	130/127	1.018	11	1.1		131/127	0.979	11	1.078		129/128	0.998	11	1.043		130/128	1.05
1008	gi|1680484	p60 [Gallus gallus]	312	16246	8	8	2	2	19.4	4.65	1.14	Quantitation summary for protein	129/126	0.902	8	1.24		130/126	0.798	8	1.192	*	131/126	0.756	8	1.263	*	129/127	1.046	8	1.114		130/127	0.944	6	1.023	*	131/127	0.885	8	1.148	*	129/128	1.145	6	1.043	*	130/128	1.065
1009	gi|50729140	PREDICTED: NADH-cytochrome b5 reductase 3 [Gallus gallus]	311	39795	25	15	6	5	17.3	8.7	0.61	Quantitation summary for protein	129/126	1.185	20	[1.044]		130/126	1.032	20	[1.051]		131/126	0.999	20	1.058		129/127	1.143	20	[1.040]		130/127	1.016	20	[1.050]		131/127	0.973	20	[1.047]		129/128	1.449	20	1.023	*	130/128	1.28
1010	gi|363743667	PREDICTED: protein QIL1-like [Gallus gallus]	311	13941	17	17	2	2	14.4	7.82	0.55	Quantitation summary for protein	129/126	1.01	17	1.024		130/126	1.017	17	1.025	*	131/126	0.994	17	1.029		129/127	0.943	17	1.021	*	130/127	0.97	17	1.013	*	131/127	0.937	17	1.02	*	129/128	0.864	17	1.021	*	130/128	0.883
1011	gi|363739300	PREDICTED: aminoacyl tRNA synthase complex-interacting multifunctional protein 2-like isoform 1 [Gallus gallus]	310	31656	14	14	4	4	17	7.63	0.49	Quantitation summary for protein	129/126	0.968	14	1.023	*	130/126	1.072	14	1.028	*	131/126	0.968	14	[1.029]		129/127	0.807	14	[1.043]		130/127	0.912	14	[1.064]		131/127	0.815	14	[1.071]		129/128	0.958	14	[1.021]		130/128	1.076
1012	gi|50730394	PREDICTED: ubiquitin-protein ligase E3A [Gallus gallus]	310	116793	17	15	8	7	9.2	5.19	0.25	Quantitation summary for protein	129/126	1.019	15	1.036		130/126	0.941	15	1.081	*	131/126	0.92	15	1.077	*	129/127	0.954	15	1.074	*	130/127	0.899	15	[1.107]		131/127	0.87	15	1.092	*	129/128	1.16	15	1.036	*	130/128	1.098
1013	gi|50732786	PREDICTED: glycerol-3-phosphate dehydrogenase 1-like [Gallus gallus]	310	45837	15	14	6	5	16.7	6.55	0.52	Quantitation summary for protein	129/126	0.999	15	1.046		130/126	0.871	15	[1.026]		131/126	0.864	15	1.042	*	129/127	1.159	15	[1.075]		130/127	1.031	15	1.064		131/127	1.012	15	[1.079]		129/128	1.248	15	1.045	*	130/128	1.104
1014	gi|363745794	PREDICTED: synaptophysin-like protein 2-like [Gallus gallus]	310	33470	16	13	4	4	14.2	8.6	1.13	Quantitation summary for protein	129/126	0.892	15	[1.111]		130/126	0.93	15	[1.122]		131/126	0.9	14	1.058	*	129/127	1.033	15	1.096		130/127	1.1	15	[1.158]		131/127	1.051	15	[1.151]		129/128	1.133	15	1.075	*	130/128	1.198
1015	gi|363746921	PREDICTED: hsp70-binding protein 1-like [Gallus gallus]	308	26994	11	8	4	3	26	5.62	1.01	Quantitation summary for protein	129/126	0.788	10	1.092	*	130/126	1.154	10	[1.111]		131/126	1.1	10	[1.110]		129/127	0.976	8	1.048		130/127	1.463	9	1.069	*	131/127	1.378	9	1.07	*	129/128	0.993	9	1.058		130/128	1.475
1016	gi|363731599	PREDICTED: LOW QUALITY PROTEIN: ryanodine receptor 2 [Gallus gallus]	308	640389	43	25	14	8	2.5	5.64	0.06	Quantitation summary for protein	129/126	0.958	10	1.088		130/126	0.996	10	1.091		131/126	0.75	10	[1.076]		129/127	0.838	9	1.051	*	130/127	0.912	10	1.073	*	131/127	0.679	10	1.075	*	129/128	1.172	10	1.054	*	130/128	1.236
1017	gi|50738728	PREDICTED: MACRO domain-containing protein 2-like [Gallus gallus]	308	27775	5	5	2	2	12.7	3.95	0.25	Quantitation summary for protein	129/126	0.773	5	1.15	*	130/126	0.987	5	1.165		131/126	0.864	5	1.115	*	129/127	0.858	5	1.176		130/127	1.118	5	1.146		131/127	0.969	5	1.141		129/128	0.773	4	1.066	*	130/128	1.047
1018	gi|363743396	PREDICTED: C-type mannose receptor 2 [Gallus gallus]	307	187131	17	16	6	6	4.3	5.7	0.11	Quantitation summary for protein	129/126	1.069	17	1.039	*	130/126	0.746	16	1.072	*	131/126	0.872	17	1.049	*	129/127	0.919	17	[1.055]		130/127	0.658	17	[1.141]		131/127	0.757	17	[1.063]		129/128	1.165	17	1.019	*	130/128	0.825
1019	gi|363734018	PREDICTED: uncharacterized protein LOC426566 [Gallus gallus]	307	180116	17	15	8	8	6.5	6.43	0.2	Quantitation summary for protein	129/126	1.008	11	1.062		130/126	1.07	11	1.109		131/126	0.915	11	[1.117]		129/127	1.041	11	1.073		130/127	0.947	10	1.105		131/127	0.955	11	1.106		129/128	1.129	11	1.068	*	130/128	1.051
1020	gi|5420367	hypoxanthine guanine phosphoribosyl transferase [Gallus gallus]	306	29690	10	10	4	4	21.1	6.99	0.53	Quantitation summary for protein	129/126	0.885	10	1.019	*	130/126	0.841	10	1.048	*	131/126	0.861	10	1.027	*	129/127	1.022	9	1.006	*	130/127	0.998	10	1.053		131/127	1.011	10	1.029		129/128	0.989	10	1.03		130/128	0.954
1021	gi|363735541	PREDICTED: sideroflexin-1 [Gallus gallus]	306	38391	10	10	4	4	14.3	9.51	0.51	Quantitation summary for protein	129/126	1.011	10	1.074		130/126	0.943	9	1.06	*	131/126	1.05	10	[1.082]		129/127	1.032	10	1.081		130/127	0.977	9	1.039		131/127	1.091	8	1.024	*	129/128	0.962	10	1.032	*	130/128	0.891
1022	gi|50729668	PREDICTED: protein TFG [Gallus gallus]	306	45654	19	16	4	4	12.2	4.96	0.32	Quantitation summary for protein	129/126	0.986	18	[1.059]		130/126	0.767	18	1.074	*	131/126	0.954	18	[1.099]		129/127	1.009	18	[1.041]		130/127	0.801	18	1.059	*	131/127	0.985	18	[1.087]		129/128	0.994	18	[1.041]		130/128	0.784
1023	gi|50728568	PREDICTED: uncharacterized protein LOC417941 [Gallus gallus]	305	27970	9	9	2	2	16.5	5.08	0.25	Quantitation summary for protein	129/126	1.234	8	1.029	*	130/126	0.922	9	1.072	*	131/126	1.297	9	1.024	*	129/127	1.279	9	1.06	*	130/127	0.978	9	[1.063]		131/127	1.338	8	1.028	*	129/128	1.218	8	1.022	*	130/128	0.923
1024	gi|60098401	hypothetical protein RCJMB04_1l3 [Gallus gallus]	303	32517	20	16	4	4	19.5	3.8	0.63	Quantitation summary for protein	129/126	1.352	16	[1.053]		130/126	1.284	16	1.058	*	131/126	1.42	15	1.033	*	129/127	1.008	16	1.019		130/127	0.977	16	1.083		131/127	1.082	16	1.03	*	129/128	1.095	16	1.024	*	130/128	1.054
1025	gi|363742557	PREDICTED: uncharacterized protein LOC100859721 [Gallus gallus]	303	17487	21	14	8	5	33.6	9.1	3.09	Quantitation summary for protein	129/126	1.763	17	1.131	*	130/126	1.52	17	1.202	*	131/126	2.121	17	1.17	*	129/127	1.653	17	1.061	*	130/127	1.455	17	[1.230]		131/127	2.009	17	1.198	*	129/128	1.391	17	1.053	*	130/128	1.217
1026	gi|118094580	PREDICTED: carnitine O-palmitoyltransferase 2, mitochondrial [Gallus gallus]	302	85031	22	16	9	7	13.3	8.53	0.35	Quantitation summary for protein	129/126	0.922	16	1.043	*	130/126	1.04	16	1.054	*	131/126	0.973	15	1.022	*	129/127	0.951	15	1.023	*	130/127	1.105	16	1.062	*	131/127	1.029	16	[1.041]		129/128	0.929	16	1.028	*	130/128	1.063
1027	gi|60098657	hypothetical protein RCJMB04_4m5 [Gallus gallus]	302	67655	20	13	8	5	12.8	6.56	0.39	Quantitation summary for protein	129/126	1.234	15	1.029	*	130/126	1.243	16	1.041	*	131/126	0.971	16	1.048	*	129/127	1.017	16	1.027	*	130/127	1.063	16	1.059	*	131/127	0.822	16	1.072	*	129/128	1.167	16	1.019	*	130/128	1.213
1028	gi|664925	GTP-binding protein [Gallus gallus]	302	26657	11	8	6	4	32.1	5.98	0.8	Quantitation summary for protein	129/126	0.977	9	1.06		130/126	0.955	9	1.048	*	131/126	0.936	9	1.046	*	129/127	0.998	9	1.037		130/127	0.995	9	1.056		131/127	0.965	9	1.066		129/128	1.214	9	1.069	*	130/128	1.204
1029	gi|53133904	hypothetical protein RCJMB04_21m21 [Gallus gallus]	301	37202	38	20	11	9	37	9.31	1.56	Quantitation summary for protein	129/126	0.943	27	[1.079]		130/126	1.017	27	[1.046]		131/126	1.02	27	1.052	*	129/127	0.918	27	1.051	*	130/127	1.01	27	[1.091]		131/127	1.003	27	1.055		129/128	0.874	27	1.045	*	130/128	0.956
1030	gi|50751250	PREDICTED: RNA 3~-terminal phosphate cyclase [Gallus gallus]	301	44925	13	11	4	4	10.1	8.06	0.43	Quantitation summary for protein	129/126	1.458	12	[1.100]		130/126	0.92	11	[1.124]		131/126	1.001	12	1.081		129/127	1.452	12	[1.121]		130/127	0.935	11	1.153		131/127	1.006	12	1.087		129/128	1.1	12	[1.054]		130/128	0.707
1031	gi|53133098	hypothetical protein RCJMB04_14h20 [Gallus gallus]	300	28144	15	14	6	6	36.4	5.56	1.44	Quantitation summary for protein	129/126	0.964	14	1.046	*	130/126	0.889	13	1.069	*	131/126	1.006	14	[1.087]		129/127	1.09	14	1.043	*	130/127	1.093	14	[1.109]		131/127	1.149	14	[1.099]		129/128	1.045	13	1.028	*	130/128	1.055
1032	gi|53136762	hypothetical protein RCJMB04_33h20 [Gallus gallus]	300	38970	9	6	4	4	20.2	7.72	0.63	Quantitation summary for protein	129/126	1.012	9	1.084		130/126	0.843	9	1.079	*	131/126	0.885	9	1.07	*	129/127	0.966	9	1.038	*	130/127	0.822	9	1.108	*	131/127	0.853	9	1.058	*	129/128	1.078	9	1.047	*	130/128	0.911
1033	gi|118089398	PREDICTED: UDP-N-acetylglucosamine--peptide N-acetylglucosaminyltransferase 110 kDa subunit isoform 1 [Gallus gallus]	299	129072	9	9	2	2	1.8	6.21	0.05	Quantitation summary for protein	129/126	0.959	7	1.011	*	130/126	1.006	9	1.035		131/126	1.035	9	1.039	*	129/127	0.766	9	1.025	*	130/127	0.836	8	1.014	*	131/127	0.843	9	1.024	*	129/128	1.005	9	1.023		130/128	1.079
1034	gi|363746885	PREDICTED: serine/threonine-protein phosphatase PP1-alpha catalytic subunit-like, partial [Gallus gallus]	299	31338	18	14	7	6	32.8	5.4	1.24	Quantitation summary for protein	129/126	---	1	---		130/126	---	1	---		131/126	---	1	---		129/127	---	1	---		130/127	---	1	---		131/127	---	1	---		129/128	---	1	---		130/128	---
1035	gi|118097771	PREDICTED: lysosomal alpha-glucosidase [Gallus gallus]	299	110490	18	12	8	5	8.6	5.86	0.23	Quantitation summary for protein	129/126	0.91	15	1.063	*	130/126	0.868	15	[1.074]		131/126	0.963	15	[1.071]		129/127	1.048	15	[1.080]		130/127	1.02	15	[1.050]		131/127	1.12	15	1.051	*	129/128	0.725	15	1.034	*	130/128	0.702
1036	gi|50736146	PREDICTED: NADH dehydrogenase [ubiquinone] iron-sulfur protein 6, mitochondrial isoform 3 [Gallus gallus]	298	16381	10	7	4	3	35.9	9.22	1.12	Quantitation summary for protein	129/126	0.852	7	1.084	*	130/126	1.042	7	[1.457]		131/126	0.894	7	1.182		129/127	0.966	7	[1.151]		130/127	1.207	7	[1.561]		131/127	1.024	7	1.118		129/128	0.872	7	1.106	*	130/128	1.082
1037	gi|363745920	PREDICTED: apolipoprotein A-II-like [Gallus gallus]	298	12496	20	18	5	4	45.4	9.99	3.26	Quantitation summary for protein	129/126	1.543	20	1.091	*	130/126	1.128	20	1.139	*	131/126	1.38	20	1.11	*	129/127	1.55	20	[1.073]		130/127	1.157	20	[1.146]		131/127	1.4	20	1.097	*	129/128	1.23	20	1.059	*	130/128	0.913
1038	gi|313661476	spectrin beta chain, brain 1 [Gallus gallus]	298	317822	14	8	11	6	4.9	5.37	0.07	Quantitation summary for protein	129/126	1.311	10	1.072	*	130/126	1.154	10	1.092	*	131/126	1.264	10	1.048	*	129/127	1.108	10	1.042	*	130/127	0.996	10	1.104		131/127	1.079	10	1.066	*	129/128	1.131	10	1.059	*	130/128	1.01
1039	gi|363731239	PREDICTED: MACRO domain-containing protein 2 [Gallus gallus]	298	10776	21	13	4	2	41.8	4.99	1.3	Quantitation summary for protein	129/126	0.69	15	1.038	*	130/126	0.809	15	1.053	*	131/126	0.762	15	1.043	*	129/127	0.797	15	1.027	*	130/127	0.985	14	1.032		131/127	0.887	15	1.036	*	129/128	0.903	15	1.025	*	130/128	1.073
1040	gi|363736632	PREDICTED: FAS-associated factor 1 [Gallus gallus]	297	82701	19	15	7	6	10.4	5	0.31	Quantitation summary for protein	129/126	1.045	16	[1.026]		130/126	0.951	16	1.045	*	131/126	0.923	16	1.043	*	129/127	1.012	16	1.039		130/127	0.94	16	1.066	*	131/127	0.903	16	1.069	*	129/128	1.036	16	1.027	*	130/128	0.956
1041	gi|118088958	PREDICTED: glutamate--cysteine ligase catalytic subunit [Gallus gallus]	296	92250	10	9	3	2	5.2	5.97	0.07	Quantitation summary for protein	129/126	1.018	9	1.028		130/126	0.741	8	1.034	*	131/126	0.837	9	1.025	*	129/127	1.165	9	1.041	*	130/127	0.842	9	1.057	*	131/127	0.968	9	1.046		129/128	1.276	9	[1.055]		130/128	0.917
1042	gi|98162715	developmentally regulated GTP binding protein 1 [Gallus gallus]	295	49714	10	10	3	3	9.8	8.96	0.29	Quantitation summary for protein	129/126	1.314	10	1.091	*	130/126	0.938	10	1.105		131/126	1.102	9	1.049	*	129/127	1.131	10	1.091	*	130/127	0.824	10	1.109	*	131/127	0.959	9	1.078		129/128	1.036	10	1.081		130/128	0.75
1043	gi|363733036	PREDICTED: histone-lysine N-methyltransferase SETD7 [Gallus gallus]	294	45356	15	14	3	2	6.6	4.58	0.15	Quantitation summary for protein	129/126	1.033	14	1.021	*	130/126	1.018	14	1.021	*	131/126	1.074	14	1.025	*	129/127	1.019	14	1.019	*	130/127	1.025	14	1.02	*	131/127	1.07	14	1.02	*	129/128	0.994	14	[1.010]		130/128	0.994
1044	gi|363732271	PREDICTED: laminin subunit alpha-2 [Gallus gallus]	294	393340	30	20	14	10	3.9	5.91	0.09	Quantitation summary for protein	129/126	0.984	26	[1.049]		130/126	1.048	25	1.045	*	131/126	1.134	26	1.043	*	129/127	1.084	26	[1.035]		130/127	1.174	26	1.047	*	131/127	1.261	26	1.035	*	129/128	0.991	26	1.021	*	130/128	1.067
1045	gi|306482629	protein MEMO1 [Gallus gallus]	293	37615	21	14	6	5	19.5	6.67	0.8	Quantitation summary for protein	129/126	0.838	15	1.063	*	130/126	0.811	15	[1.090]		131/126	0.726	15	[1.095]		129/127	0.888	15	[1.040]		130/127	0.878	15	1.115	*	131/127	0.777	15	[1.101]		129/128	0.945	15	1.051	*	130/128	0.928
1046	gi|53130538	hypothetical protein RCJMB04_8j15 [Gallus gallus]	293	92024	9	9	3	3	6.7	9.22	0.15	Quantitation summary for protein	129/126	1.198	8	1.046	*	130/126	1.161	9	1.051	*	131/126	1.135	9	1.085	*	129/127	0.941	9	1.044	*	130/127	0.948	9	1.045	*	131/127	0.917	9	1.074	*	129/128	1.057	9	1.053	*	130/128	1.059
1047	gi|63793	stathmin [Gallus gallus]	291	22572	18	11	6	5	39.2	6.18	1.3	Quantitation summary for protein	129/126	1.061	17	[1.111]		130/126	0.996	17	[1.118]		131/126	1.06	17	1.08	*	129/127	0.851	17	[1.109]		130/127	0.815	17	[1.136]		131/127	0.859	17	1.081	*	129/128	1.056	17	1.068	*	130/128	1.005
1048	gi|363745941	PREDICTED: prefoldin subunit 5-like [Gallus gallus]	291	21201	10	9	4	4	28.4	5.9	1.09	Quantitation summary for protein	129/126	0.857	10	1.065	*	130/126	0.853	10	1.105	*	131/126	0.938	9	1.036	*	129/127	0.883	10	1.053	*	130/127	0.897	10	1.103	*	131/127	0.974	10	1.059		129/128	0.903	9	1.046	*	130/128	0.89
1049	gi|10636369	coagulation factor XIIIA [Gallus gallus]	291	95323	24	13	12	7	15.8	6.22	0.36	Quantitation summary for protein	129/126	1.625	20	[1.103]		130/126	0.915	20	1.056	*	131/126	1.295	20	1.05	*	129/127	1.648	20	1.069	*	130/127	0.947	20	[1.091]		131/127	1.327	20	1.043	*	129/128	1.615	20	1.04	*	130/128	0.922
1050	gi|363733162	PREDICTED: 60S ribosomal protein L34-like [Gallus gallus]	290	17651	15	13	3	3	20.5	11.48	1.4	Quantitation summary for protein	129/126	1.846	15	1.04	*	130/126	1.525	15	1.061	*	131/126	1.612	15	1.058	*	129/127	1.033	15	1.027	*	130/127	0.871	15	1.047	*	131/127	0.911	15	[1.058]		129/128	1.189	15	1.026	*	130/128	0.997
1051	gi|1816448	c-JUN amino-terminal kinase-2 alpha1 [Gallus gallus]	290	51139	20	18	7	7	19.6	5.97	0.55	Quantitation summary for protein	129/126	0.807	8	1.072	*	130/126	0.913	8	[1.226]		131/126	0.703	8	1.2	*	129/127	0.935	8	1.07	*	130/127	1.081	8	[1.279]		131/127	0.823	8	[1.236]		129/128	1.008	8	1.098		130/128	1.158
1052	gi|211896	h-caldesmon [Gallus gallus]	290	114933	13	7	7	3	8.6	5.56	0.09	Quantitation summary for protein	129/126	1.44	7	1.051	*	130/126	1.379	7	1.053	*	131/126	1.867	7	1.028	*	129/127	1.266	7	1.027	*	130/127	1.238	7	1.028	*	131/127	1.658	7	1.017	*	129/128	1.343	7	1.036	*	130/128	1.304
1053	gi|118090250	PREDICTED: septin-11 [Gallus gallus]	289	60672	13	12	7	7	19.3	6.53	0.45	Quantitation summary for protein	129/126	1.054	10	1.028	*	130/126	0.828	11	1.041	*	131/126	0.954	11	[1.047]		129/127	1.078	9	1.012	*	130/127	0.898	11	1.073	*	131/127	1.023	11	1.058		129/128	1.021	11	1.036		130/128	0.843
1054	gi|313760586	isovaleryl-CoA dehydrogenase, mitochondrial [Gallus gallus]	289	52345	12	11	7	7	18.5	8.41	0.63	Quantitation summary for protein	129/126	0.993	11	1.063		130/126	1.056	11	1.078	*	131/126	1.034	11	1.047	*	129/127	1.029	11	1.05		130/127	1.118	11	[1.135]		131/127	1.083	11	[1.098]		129/128	0.972	10	1.039	*	130/128	1.058
1055	gi|50731339	PREDICTED: probable fructose-2,6-bisphosphatase TIGAR [Gallus gallus]	289	36269	15	14	6	6	20.4	7.03	0.69	Quantitation summary for protein	129/126	1.051	15	1.062	*	130/126	0.883	15	1.083	*	131/126	0.799	15	1.09	*	129/127	1.104	15	1.052	*	130/127	0.947	15	1.069	*	131/127	0.847	15	1.078	*	129/128	0.91	15	[1.055]		130/128	0.776
1056	gi|363746215	PREDICTED: isocitrate dehydrogenase [NAD] subunit gamma, mitochondrial-like [Gallus gallus]	288	12762	6	6	2	2	26.5	7.9	0.61	Quantitation summary for protein	129/126	1.016	6	1.021		130/126	0.992	6	1.144		131/126	1.029	6	[1.101]		129/127	1.109	6	1.114		130/127	1.105	6	1.109		131/127	1.133	6	1.067	*	129/128	0.964	6	1.101		130/128	0.954
1057	gi|53130826	hypothetical protein RCJMB04_10e21 [Gallus gallus]	288	44302	16	13	6	5	13.3	5.88	0.78	Quantitation summary for protein	129/126	1.391	7	1.071	*	130/126	0.98	7	1.052		131/126	1.069	7	1.043	*	129/127	1.425	7	1.085	*	130/127	1.026	7	1.067		131/127	1.107	7	1.054	*	129/128	1.239	7	1.076	*	130/128	0.886
1058	gi|363739889	PREDICTED: serine/threonine-protein phosphatase PGAM5, mitochondrial [Gallus gallus]	288	29442	15	13	4	4	12.9	8.76	0.71	Quantitation summary for protein	129/126	1.078	13	1.041	*	130/126	0.901	13	1.078	*	131/126	1.108	13	1.053	*	129/127	0.938	13	1.032	*	130/127	0.8	13	[1.089]		131/127	0.974	13	1.049		129/128	0.884	13	1.026	*	130/128	0.749
1059	gi|1770301	Translin [Gallus gallus]	288	29210	16	12	6	6	32.8	6.25	1.13	Quantitation summary for protein	129/126	1.182	13	[1.025]		130/126	0.965	13	[1.045]		131/126	1.032	13	1.047	*	129/127	1.08	13	1.022	*	130/127	0.9	13	[1.057]		131/127	0.952	13	1.049	*	129/128	1.173	13	1.03	*	130/128	0.971
1060	gi|1545942	mitochondrial creatine kinase [Gallus gallus]	288	45128	61	34	7	6	17.5	6.77	1.17	Quantitation summary for protein	129/126	1.024	2	1.211		130/126	0.991	2	1.21		131/126	1.121	2	1.051		129/127	1.054	2	1.151		130/127	1.04	2	1.273		131/127	1.164	2	1.106		129/128	1.055	2	1.218		130/128	1.034
1061	gi|53130772	hypothetical protein RCJMB04_10a7 [Gallus gallus]	288	63849	11	9	7	6	18.6	5.07	0.35	Quantitation summary for protein	129/126	1.071	10	1.089	*	130/126	1.129	10	1.092	*	131/126	1.03	10	1.069		129/127	0.768	10	1.04	*	130/127	0.827	10	1.069	*	131/127	0.77	8	1.016	*	129/128	0.798	10	1.049	*	130/128	0.853
1062	gi|363727367	PREDICTED: protein kinase C theta type [Gallus gallus]	287	96011	13	11	7	6	12.5	6.87	0.26	Quantitation summary for protein	129/126	1.026	11	1.12		130/126	0.811	11	1.103	*	131/126	0.772	11	1.092	*	129/127	1.149	11	1.086	*	130/127	0.927	11	1.125		131/127	0.844	10	1.081	*	129/128	1.081	11	1.075	*	130/128	0.867
1063	gi|53127756	hypothetical protein RCJMB04_3e17 [Gallus gallus]	287	52571	24	17	6	6	12.9	6.3	0.53	Quantitation summary for protein	129/126	1.328	7	1.04	*	130/126	1.361	7	1.062	*	131/126	1.564	7	1.047	*	129/127	1.14	7	1.042	*	130/127	1.193	7	1.074	*	131/127	1.356	7	1.053	*	129/128	1.2	7	1.032	*	130/128	1.248
1064	gi|60098621	hypothetical protein RCJMB04_4b12 [Gallus gallus]	287	18643	21	17	7	6	53.5	7.79	4.27	Quantitation summary for protein	129/126	0.917	7	1.057	*	130/126	0.813	7	1.146	*	131/126	0.889	7	1.101	*	129/127	1.06	7	1.039	*	130/127	0.959	7	1.159		131/127	1.038	7	1.129		129/128	0.875	7	1.043	*	130/128	0.787
1065	gi|118085706	PREDICTED: glycylpeptide N-tetradecanoyltransferase 2 [Gallus gallus]	286	67429	13	13	4	4	12	7.18	0.27	Quantitation summary for protein	129/126	---	1	---		130/126	---	1	---		131/126	---	1	---		129/127	---	1	---		130/127	---	1	---		131/127	---	1	---		129/128	---	1	---		130/128	---
1066	gi|63472	unnamed protein product [Gallus gallus]	285	14110	10	8	3	3	31.1	11.36	1.38	Quantitation summary for protein	129/126	1.794	10	1.084	*	130/126	3.159	10	1.172	*	131/126	3.365	10	1.148	*	129/127	2.005	10	1.072	*	130/127	3.605	10	1.209	*	131/127	3.799	10	1.185	*	129/128	1.549	10	1.062	*	130/128	2.768
1067	gi|363747224	PREDICTED: trans-1,2-dihydrobenzene-1,2-diol dehydrogenase-like, partial [Gallus gallus]	285	30669	12	12	4	4	17.7	7.74	0.51	Quantitation summary for protein	129/126	0.854	11	1.06	*	130/126	0.807	12	1.079	*	131/126	0.973	12	1.067		129/127	0.977	12	[1.093]		130/127	0.96	12	1.063	*	131/127	1.145	12	1.058	*	129/128	0.779	10	1.05	*	130/128	0.767
1068	gi|50749765	PREDICTED: glutathione S-transferase omega-1 isoform 2 [Gallus gallus]	283	31731	17	15	6	5	20.9	6.97	0.82	Quantitation summary for protein	129/126	0.679	17	1.031	*	130/126	0.961	17	[1.081]		131/126	0.818	17	1.042	*	129/127	0.921	17	1.022	*	130/127	1.332	17	[1.072]		131/127	1.122	17	1.036	*	129/128	0.944	17	1.026	*	130/128	1.356
1069	gi|50755345	PREDICTED: NADH dehydrogenase [ubiquinone] 1 beta subcomplex subunit 6 [Gallus gallus]	282	16283	18	13	7	5	45.3	9.74	2.1	Quantitation summary for protein	129/126	0.863	14	[1.091]		130/126	1.101	14	1.154	*	131/126	0.721	14	1.14	*	129/127	1.026	14	1.074		130/127	1.337	14	1.1	*	131/127	0.867	14	[1.116]		129/128	1.138	14	1.049	*	130/128	1.473
1070	gi|392018	filamin [Gallus gallus]	282	316763	17	17	7	7	2.7	5.61	0.09	Quantitation summary for protein	129/126	1.262	6	[1.072]		130/126	1.245	6	1.081	*	131/126	1.466	6	1.062	*	129/127	0.963	6	1.056		130/127	0.969	6	1.177		131/127	1.13	6	1.126		129/128	1.109	6	1.03	*	130/128	1.109
1071	gi|60098651	hypothetical protein RCJMB04_4i13 [Gallus gallus]	281	148505	18	17	10	9	8.6	5.94	0.22	Quantitation summary for protein	129/126	1.031	17	1.035	*	130/126	0.897	17	[1.039]		131/126	1.049	17	1.046	*	129/127	0.995	17	1.036		130/127	0.884	17	[1.075]		131/127	1.023	17	[1.078]		129/128	1.085	17	1.033	*	130/128	0.958
1072	gi|212258	macrophage migration inhibitory factor [Gallus gallus]	281	14538	6	6	1	1	14.8	6.88	0.88	Quantitation summary for protein	129/126	0.857	6	1.115	*	130/126	0.573	5	1.124	*	131/126	0.701	6	1.132	*	129/127	1.255	6	[1.232]		130/127	0.895	6	[1.368]		131/127	1.006	5	1.098		129/128	1.314	5	1.089	*	130/128	0.835
1073	gi|53136708	hypothetical protein RCJMB04_32l4 [Gallus gallus]	281	72712	22	12	7	5	10.4	8.41	0.25	Quantitation summary for protein	129/126	1.292	11	1.026	*	130/126	1.335	11	1.04	*	131/126	1.533	11	1.025	*	129/127	1.043	11	[1.033]		130/127	1.1	11	1.046	*	131/127	1.277	10	1.032	*	129/128	1.175	10	1.026	*	130/128	1.253
1074	gi|363742292	PREDICTED: splicing factor, proline- and glutamine-rich [Gallus gallus]	280	77206	18	14	8	7	13.9	9.49	0.34	Quantitation summary for protein	129/126	1.555	15	[1.052]		130/126	1.724	15	1.096	*	131/126	1.933	15	1.075	*	129/127	1.022	15	1.065		130/127	1.157	15	[1.153]		131/127	1.283	15	[1.120]		129/128	1.091	15	1.073	*	130/128	1.227
1075	gi|145411437	calpastatin [Gallus gallus]	279	103219	11	9	3	3	6.8	5.44	0.1	Quantitation summary for protein	129/126	0.784	9	1.055	*	130/126	0.777	9	1.098	*	131/126	0.815	9	1.041	*	129/127	1.159	8	1.023	*	130/127	1.171	7	1.052	*	131/127	1.207	9	[1.065]		129/128	1.091	9	1.046	*	130/128	1.096
1076	gi|12381879	ribosomal protein L36 [Gallus gallus]	278	16527	17	11	6	4	36.2	11.34	2.06	Quantitation summary for protein	129/126	1.2	12	1.109	*	130/126	1.428	12	1.155	*	131/126	1.388	12	1.136	*	129/127	0.96	12	1.098		130/127	1.166	12	1.153	*	131/127	1.121	12	1.132	*	129/128	1.162	12	1.073	*	130/128	1.403
1077	gi|363732427	PREDICTED: coiled-coil domain-containing protein 25-like [Gallus gallus]	278	30850	23	12	9	5	35.7	6.55	0.85	Quantitation summary for protein	129/126	0.972	14	1.038	*	130/126	0.871	14	1.066	*	131/126	0.898	14	1.039	*	129/127	1.072	14	1.032	*	130/127	0.981	14	1.061		131/127	1	14	1.033		129/128	0.95	14	1.02	*	130/128	0.863
1078	gi|53126991	hypothetical protein RCJMB04_1i11 [Gallus gallus]	278	32876	12	11	4	4	18.2	5.29	0.47	Quantitation summary for protein	129/126	0.923	12	1.041	*	130/126	0.855	12	[1.086]		131/126	0.871	12	1.09	*	129/127	0.978	12	1.046		130/127	0.924	12	[1.087]		131/127	0.931	12	1.073	*	129/128	1.221	12	1.054	*	130/128	1.147
1079	gi|363728980	PREDICTED: cullin-4A-like [Gallus gallus]	277	105930	20	14	10	7	11.7	7.89	0.36	Quantitation summary for protein	129/126	0.979	4	1.046		130/126	0.644	3	1.095	*	131/126	0.84	4	1.168		129/127	0.987	4	1.048		130/127	0.874	4	1.173		131/127	0.855	4	1.148		129/128	1.018	4	1.087		130/128	0.896
1080	gi|314122256	sec1 family domain-containing protein 1 [Gallus gallus]	276	82206	8	7	5	4	9.5	5.74	0.17	Quantitation summary for protein	129/126	0.892	7	1.047	*	130/126	0.909	7	1.059	*	131/126	1.012	7	1.05		129/127	0.951	7	1.032	*	130/127	0.989	7	1.096		131/127	1.089	7	[1.028]		129/128	1.103	7	1.039	*	130/128	1.14
1081	gi|118100419	PREDICTED: smoothelin-like protein 2-like [Gallus gallus]	276	57828	24	16	8	5	15.4	8.43	0.56	Quantitation summary for protein	129/126	0.964	19	1.091		130/126	1.15	19	1.038	*	131/126	0.93	19	[1.128]		129/127	0.729	19	[1.095]		130/127	0.888	19	1.071	*	131/127	0.71	19	1.156	*	129/128	0.896	19	1.051	*	130/128	1.084
1082	gi|363746285	PREDICTED: alpha-soluble NSF attachment protein-like, partial [Gallus gallus]	276	26917	15	11	8	6	45.9	5.03	1.27	Quantitation summary for protein	129/126	1.049	8	[1.076]		130/126	1.065	7	1.045	*	131/126	0.973	8	1.036		129/127	0.978	8	1.045		130/127	0.983	8	1.1		131/127	0.916	8	1.058	*	129/128	1.047	8	1.049	*	130/128	1.046
1083	gi|53133602	hypothetical protein RCJMB04_18g17 [Gallus gallus]	276	21347	14	11	8	5	38	5.95	1.08	Quantitation summary for protein	129/126	1.299	8	1.179	*	130/126	0.808	8	[1.258]		131/126	0.9	8	1.179		129/127	1.194	8	[1.134]		130/127	0.758	8	[1.305]		131/127	0.835	8	[1.227]		129/128	0.947	8	1.026	*	130/128	0.597
1084	gi|381342463	pigment epithelium-derived factor precursor [Gallus gallus]	276	53408	9	9	3	3	9.9	8.85	0.27	Quantitation summary for protein	129/126	1.397	9	1.096	*	130/126	1.188	9	1.079	*	131/126	2.113	9	[1.151]		129/127	0.984	9	1.078		130/127	0.824	8	1.079	*	131/127	1.504	9	1.061	*	129/128	1.049	9	1.049	*	130/128	0.905
1085	gi|363740469	PREDICTED: sarcosine dehydrogenase, mitochondrial [Gallus gallus]	276	110511	16	10	4	3	4.2	6.42	0.09	Quantitation summary for protein	129/126	0.928	9	1.048	*	130/126	1.158	10	1.062	*	131/126	1.1	10	[1.056]		129/127	0.922	10	1.075	*	130/127	1.137	10	1.081	*	131/127	1.068	10	1.069	*	129/128	1.044	10	1.045	*	130/128	1.278
1086	gi|118099484	PREDICTED: NADH dehydrogenase [ubiquinone] 1 alpha subcomplex subunit 8 [Gallus gallus]	275	23547	12	12	5	5	32	8.42	0.94	Quantitation summary for protein	129/126	0.838	12	1.03	*	130/126	1.254	12	1.074	*	131/126	1.1	12	1.049	*	129/127	0.819	11	1.027	*	130/127	1.28	12	1.071	*	131/127	1.186	11	1.028	*	129/128	0.949	12	1.044	*	130/128	1.44
1087	gi|53133424	hypothetical protein RCJMB04_16g22 [Gallus gallus]	274	55363	10	8	6	5	16.7	8.98	0.41	Quantitation summary for protein	129/126	1.156	6	1.061	*	130/126	1.228	6	1.091	*	131/126	1.26	6	1.119	*	129/127	0.934	8	1.067	*	130/127	1.011	6	1.058		131/127	1.032	7	1.106		129/128	1.077	8	1.076	*	130/128	1.162
1088	gi|50756245	PREDICTED: catechol O-methyltransferase isoform 2 [Gallus gallus]	274	35152	23	12	8	7	34	6.21	1.25	Quantitation summary for protein	129/126	1.202	18	1.04	*	130/126	1.275	18	1.053	*	131/126	1.154	18	1.064	*	129/127	1.129	18	[1.059]		130/127	1.222	18	[1.058]		131/127	1.094	18	[1.066]		129/128	1.41	18	[1.076]		130/128	1.517
1089	gi|755484	cell division cycle control protein 37 [Gallus gallus]	274	35532	19	15	7	5	26.8	5.65	1.04	Quantitation summary for protein	129/126	---	1	---		130/126	---	1	---		131/126	---	1	---		129/127	---	1	---		130/127	---	1	---		131/127	---	1	---		129/128	---	1	---		130/128	---
1090	gi|50749278	PREDICTED: phenazine biosynthesis-like protein domain containing [Gallus gallus]	273	37454	7	6	2	1	6.2	6.72	0.09	Quantitation summary for protein	129/126	1.016	6	1.039		130/126	0.686	6	1.048	*	131/126	0.865	6	1.018	*	129/127	1.21	5	1.018	*	130/127	0.806	6	1.025	*	131/127	1.006	6	1.048		129/128	1.063	6	1.041	*	130/128	0.728
1091	gi|363731418	PREDICTED: HBS1-like protein [Gallus gallus]	273	89600	17	13	8	6	11.9	5.98	0.29	Quantitation summary for protein	129/126	1.105	16	1.042	*	130/126	1.091	16	1.045	*	131/126	0.979	16	[1.033]		129/127	1.115	16	1.036	*	130/127	1.124	16	[1.059]		131/127	0.998	16	[1.052]		129/128	0.944	16	[1.031]		130/128	0.946
1092	gi|50754987	PREDICTED: delta-sarcoglycan [Gallus gallus]	273	37692	12	7	5	3	20.5	9.33	0.66	Quantitation summary for protein	129/126	1.02	10	1.036		130/126	1.118	10	1.086	*	131/126	1.132	10	1.062	*	129/127	1.136	9	1.028	*	130/127	1.245	10	1.082	*	131/127	1.247	10	1.068	*	129/128	1.249	10	1.103	*	130/128	1.388
1093	gi|62899	glycinamide ribonucleotide synthetase-aminoimidazole ribonucleotide synthetase-glycinamide ribonucleotide transformylase [Gallus gallus]	272	124289	14	10	9	7	9.8	7.51	0.23	Quantitation summary for protein	129/126	0.593	2	1	*	130/126	0.618	2	1.046	*	131/126	0.79	2	1.005	*	129/127	0.943	2	1.021		130/127	1.004	2	1.068		131/127	1.27	2	1.016	*	129/128	0.913	2	1.003	*	130/128	0.966
1094	gi|363733160	PREDICTED: LOW QUALITY PROTEIN: alanine-glyoxylate aminotransferase 2-like 1 [Gallus gallus]	272	65492	20	15	7	6	13.8	7.03	0.41	Quantitation summary for protein	129/126	0.894	16	[1.054]		130/126	1.021	16	1.037	*	131/126	0.997	16	[1.046]		129/127	0.766	16	1.048	*	130/127	0.893	16	1.064	*	131/127	0.863	16	1.07	*	129/128	0.912	15	1.032	*	130/128	1.102
1095	gi|363742178	PREDICTED: nudC domain-containing protein 3 [Gallus gallus]	272	45029	8	7	3	2	9.3	4.95	0.24	Quantitation summary for protein	129/126	1.287	8	1.058	*	130/126	1.23	8	1.055	*	131/126	1.205	8	1.031	*	129/127	1.085	8	1.075	*	130/127	1.059	8	[1.134]		131/127	1.027	8	[1.110]		129/128	1.063	8	1.049	*	130/128	1.031
1096	gi|363746318	PREDICTED: peptidyl-prolyl cis-trans isomerase NIMA-interacting 1-like, partial [Gallus gallus]	271	9086	13	13	2	2	33.8	4.83	0.91	Quantitation summary for protein	129/126	1.296	13	[1.072]		130/126	0.873	13	[1.111]		131/126	0.83	13	[1.083]		129/127	1.461	13	[1.069]		130/127	1.005	13	[1.113]		131/127	0.945	13	[1.086]		129/128	0.946	13	[1.043]		130/128	0.647
1097	gi|254118	glycogen phosphorylase=putative collagen-binding protein [Gallus domesticus=chickens, skeletal muscle, Peptide Partial, 36 aa, segment 2 of 3]	270	4806	33	19	3	3	52.8	4.95	8.84	Quantitation summary for protein	129/126	0.831	31	[1.158]		130/126	0.964	31	1.125		131/126	0.836	31	[1.161]		129/127	0.799	31	[1.147]		130/127	0.946	31	1.152	*	131/127	0.812	31	1.164	*	129/128	1.041	31	1.097	*	130/128	1.226
1098	gi|60098357	hypothetical protein RCJMB04_1b12 [Gallus gallus]	270	27750	16	8	4	3	19.4	8.21	0.41	Quantitation summary for protein	129/126	1.086	9	1.033	*	130/126	1.075	9	1.072	*	131/126	0.996	9	1.054		129/127	1.02	9	1.054		130/127	1.03	9	1.065		131/127	0.945	9	1.063	*	129/128	1.373	9	1.066	*	130/128	1.378
1099	gi|313747590	tripartite motif-containing protein 55 [Gallus gallus]	270	56750	12	11	4	4	11.3	4.61	0.25	Quantitation summary for protein	129/126	1.425	9	1.093	*	130/126	1.381	9	1.06	*	131/126	1.175	9	1.066	*	129/127	0.8	9	[1.087]		130/127	0.792	9	1.072	*	131/127	0.666	9	1.072	*	129/128	0.934	8	[1.099]		130/128	0.915
1100	gi|118089688	PREDICTED: cullin-4B [Gallus gallus]	270	121130	35	23	7	6	6.5	8.03	0.27	Quantitation summary for protein	129/126	0.918	12	1.105	*	130/126	0.462	12	1.173	*	131/126	0.75	12	1.106	*	129/127	0.941	12	1.061	*	130/127	0.483	12	1.127	*	131/127	0.776	12	1.07	*	129/128	0.775	12	1.154	*	130/128	0.396
1101	gi|118101365	PREDICTED: proline synthase co-transcribed bacterial homolog protein [Gallus gallus]	270	35265	16	11	7	6	22.8	8.35	1.24	Quantitation summary for protein	129/126	0.985	16	1.042		130/126	0.899	16	1.042	*	131/126	0.878	16	1.031	*	129/127	1.137	16	1.03	*	130/127	1.059	16	[1.061]		131/127	1.024	16	1.042	*	129/128	0.966	16	1.019	*	130/128	0.894
1102	gi|68299602	glycinamide ribonucleotide synthetase-aminoimidazole ribonucleotide synthetase-glycinamide ribonucleotide transformylase [Gallus gallus]	269	124274	14	10	9	7	9.8	7.51	0.23	Quantitation summary for protein	129/126	1.566	2	1.066		130/126	1.546	2	1.038	*	131/126	1.143	2	1.072		129/127	0.935	2	1.047		130/127	0.942	2	1.019		131/127	0.689	2	1.053		129/128	1.04	2	1.003	*	130/128	1.042
1103	gi|53129703	hypothetical protein RCJMB04_5p24 [Gallus gallus]	269	23907	10	8	2	2	13.1	4.55	0.48	Quantitation summary for protein	129/126	1.224	9	[1.087]		130/126	1.263	8	1.041	*	131/126	1.251	9	1.065	*	129/127	1.157	9	1.039	*	130/127	1.223	9	1.121	*	131/127	1.189	8	1.062	*	129/128	1.196	9	1.048	*	130/128	1.257
1104	gi|150416167	RecName: Full=Ubiquitin-conjugating enzyme E2 variant 1; Short=UEV-1; AltName: Full=CROC-1B	268	18730	19	16	7	7	53.8	7.71	4.22	Quantitation summary for protein	129/126	0.896	5	1.113		130/126	0.931	5	1.161		131/126	0.928	5	[1.139]		129/127	0.95	5	1.049		130/127	1.007	5	[1.083]		131/127	0.993	5	1.049		129/128	0.879	5	1.118		130/128	0.919
1105	gi|363744898	PREDICTED: methylcrotonoyl-CoA carboxylase beta chain, mitochondrial [Gallus gallus]	268	68085	12	8	7	4	15.2	7.94	0.21	Quantitation summary for protein	129/126	1.017	8	1.059		130/126	1.106	8	1.044	*	131/126	1.188	8	1.03	*	129/127	1.04	8	1.071		130/127	1.154	8	1.065	*	131/127	1.227	8	1.026	*	129/128	0.936	8	1.043	*	130/128	1.032
1106	gi|53130942	hypothetical protein RCJMB04_11a4 [Gallus gallus]	266	22536	15	13	4	2	27.8	6.81	0.52	Quantitation summary for protein	129/126	0.873	13	[1.034]		130/126	0.887	13	1.021	*	131/126	0.902	13	1.031	*	129/127	1.031	13	[1.024]		130/127	1.118	12	1.024	*	131/127	1.076	13	1.023	*	129/128	1.025	13	[1.026]		130/128	1.056
1107	gi|126163	RecName: Full=Beta-galactoside-binding lectin; AltName: Full=14 kDa lectin; AltName: Full=C-14; AltName: Full=Galectin CG-1B	266	17058	24	17	5	5	30.4	6.58	4.08	Quantitation summary for protein	129/126	0.88	17	1.044	*	130/126	0.919	18	1.077	*	131/126	1.251	18	1.081	*	129/127	1.079	18	1.037	*	130/127	1.145	18	1.073	*	131/127	1.542	18	1.08	*	129/128	1.09	18	1.089	*	130/128	1.149
1108	gi|118082329	PREDICTED: ras-related protein Rab-21 [Gallus gallus]	266	28619	10	10	2	2	10.5	8.12	0.55	Quantitation summary for protein	129/126	0.955	10	1.079		130/126	1.121	10	[1.237]		131/126	0.941	10	[1.111]		129/127	1.006	10	1.058		130/127	1.205	10	[1.293]		131/127	1.001	10	[1.153]		129/128	1.198	10	1.038	*	130/128	1.426
1109	gi|363743644	PREDICTED: platelet glycoprotein Ib alpha chain-like [Gallus gallus]	266	42938	7	7	2	2	10.1	4.81	0.16	Quantitation summary for protein	129/126	1.211	7	1.04	*	130/126	1.048	7	1.071		131/126	1.154	7	1.066	*	129/127	1.316	7	1.101	*	130/127	1.162	7	1.064	*	131/127	1.218	6	1.048	*	129/128	1.236	7	1.055	*	130/128	1.178
1110	gi|53127420	hypothetical protein RCJMB04_2e17 [Gallus gallus]	265	39464	3	3	1	1	6.3	5.05	0.08	Quantitation summary for protein	129/126	1.565	2	1.066		130/126	---	1	---		131/126	1.05	2	1.016		129/127	1.064	2	1.028		130/127	---	1	---		131/127	0.675	3	1.087	*	129/128	0.939	2	1.042		130/128	---
1111	gi|312596901	NADH dehydrogenase [ubiquinone] flavoprotein 3, mitochondrial isoform a precursor [Gallus gallus]	265	51611	36	21	9	8	17.6	6.39	0.64	Quantitation summary for protein	129/126	0.74	20	1.057	*	130/126	0.767	21	[1.090]		131/126	0.836	21	[1.086]		129/127	0.971	21	[1.031]		130/127	1.012	21	[1.058]		131/127	1.092	21	[1.050]		129/128	0.928	21	1.033	*	130/128	0.961
1112	gi|363743810	PREDICTED: NADH dehydrogenase [ubiquinone] iron-sulfur protein 7, mitochondrial-like [Gallus gallus]	264	26937	14	8	5	5	19	9.59	0.79	Quantitation summary for protein	129/126	0.876	11	1.051	*	130/126	1.009	11	1.05		131/126	0.883	11	1.058	*	129/127	0.948	11	1.021	*	130/127	1.114	11	1.044	*	131/127	0.964	11	[1.050]		129/128	0.9	11	1.019	*	130/128	1.051
1113	gi|53130442	hypothetical protein RCJMB04_7o8 [Gallus gallus]	264	24411	12	12	5	5	32.2	5.12	0.9	Quantitation summary for protein	129/126	0.815	12	1.084	*	130/126	0.942	12	1.048	*	131/126	0.798	12	1.094	*	129/127	0.997	12	1.053		130/127	1.176	12	[1.068]		131/127	0.955	11	1.065	*	129/128	0.932	12	1.044	*	130/128	1.092
1114	gi|60098959	hypothetical protein RCJMB04_16p8 [Gallus gallus]	264	36493	9	6	2	2	8.2	4.9	0.19	Quantitation summary for protein	129/126	1.038	9	1.055		130/126	1.009	9	[1.109]		131/126	0.895	9	1.054	*	129/127	1.023	9	[1.052]		130/127	1.017	7	1.031		131/127	0.891	9	[1.077]		129/128	1.109	9	1.067	*	130/128	1.093
1115	gi|118095059	PREDICTED: probable E3 ubiquitin-protein ligase TRIP12 [Gallus gallus]	264	251878	10	7	3	3	1.7	8.78	0.07	Quantitation summary for protein	129/126	1.549	5	1.347	*	130/126	1.291	5	1.653		131/126	1.066	5	1.294		129/127	0.934	6	1.303		130/127	0.792	6	[1.544]		131/127	0.653	5	1.039	*	129/128	0.958	6	1.666		130/128	0.825
1116	gi|363728311	PREDICTED: protein FAM162A [Gallus gallus]	263	22580	12	5	2	2	15.9	10.16	0.32	Quantitation summary for protein	129/126	0.866	10	1.028	*	130/126	1.199	10	1.04	*	131/126	0.849	10	1.052	*	129/127	0.844	10	[1.021]		130/127	1.193	10	1.044	*	131/127	0.835	10	1.041	*	129/128	1.107	10	1.029	*	130/128	1.556
1117	gi|363735646	PREDICTED: calcium/calmodulin-dependent protein kinase type II subunit gamma [Gallus gallus]	263	69717	16	9	9	8	19.5	7.32	0.58	Quantitation summary for protein	129/126	1.023	6	1.055		130/126	1.338	6	1.042	*	131/126	1.063	6	1.102		129/127	0.778	6	1.105	*	130/127	1.039	6	1.118		131/127	0.817	6	1.132	*	129/128	1.045	6	1.167		130/128	1.386
1118	gi|1667484	calcyclin [Gallus gallus]	263	12790	13	11	4	3	29.3	4.91	1.59	Quantitation summary for protein	129/126	1.408	10	1.042	*	130/126	0.88	10	1.112	*	131/126	1.231	11	1.092	*	129/127	1.75	11	1.183	*	130/127	1.117	11	1.268		131/127	1.549	11	[1.252]		129/128	1.903	11	1.177	*	130/128	1.207
1119	gi|53131115	hypothetical protein RCJMB04_11d7 [Gallus gallus]	262	39527	17	12	6	6	22.9	5.27	0.62	Quantitation summary for protein	129/126	1.1	14	1.054	*	130/126	0.997	14	[1.101]		131/126	0.946	13	1.044	*	129/127	1.052	14	[1.075]		130/127	0.974	14	[1.099]		131/127	0.922	14	[1.055]		129/128	1.031	14	1.032	*	130/128	0.948
1120	gi|363746230	PREDICTED: ubiquitin thioesterase OTUB1-like [Gallus gallus]	262	34020	10	10	5	5	25.2	5	0.92	Quantitation summary for protein	129/126	1.025	10	1.099		130/126	1.012	10	1.061		131/126	0.945	10	1.16		129/127	1.142	10	1.134	*	130/127	1.15	10	1.091	*	131/127	1.062	10	1.15		129/128	1.067	8	1.05	*	130/128	1.073
1121	gi|118092625	PREDICTED: leucine-rich repeat-containing protein 20 [Gallus gallus]	262	21347	15	11	5	5	26.2	9.23	1.08	Quantitation summary for protein	129/126	0.886	15	1.045	*	130/126	1.257	15	1.053	*	131/126	1.329	15	1.042	*	129/127	0.883	15	1.062	*	130/127	1.279	15	[1.047]		131/127	1.338	15	1.045	*	129/128	0.967	15	1.038	*	130/128	1.391
1122	gi|50748830	PREDICTED: protein phosphatase 1A [Gallus gallus]	262	48065	11	10	5	4	12.6	5.14	0.3	Quantitation summary for protein	129/126	1.149	3	1.043	*	130/126	0.81	3	1.106		131/126	0.883	3	1.075		129/127	1.075	3	1.061		130/127	0.774	3	[1.160]		131/127	0.835	3	1.135		129/128	1.129	3	1.037	*	130/128	0.807
1123	gi|60099113	hypothetical protein RCJMB04_26p17 [Gallus gallus]	261	47918	13	13	5	5	14	4.99	0.39	Quantitation summary for protein	129/126	1.058	6	1.065		130/126	0.774	6	1.081	*	131/126	0.891	6	1.085	*	129/127	1.142	6	1.075	*	130/127	0.853	6	1.053	*	131/127	1.006	5	1.042		129/128	1.149	6	1.075	*	130/128	0.852
1124	gi|211622	alpha-3 collagen type VI [Gallus gallus]	261	376734	19	12	11	8	4.4	6.29	0.08	Quantitation summary for protein	129/126	0.88	7	1.06	*	130/126	0.898	9	1.084	*	131/126	1.212	8	1.114	*	129/127	1.115	8	1.06	*	130/127	1.039	9	1.116		131/127	1.344	8	1.072	*	129/128	1.061	9	[1.100]		130/128	1.007
1125	gi|363734957	PREDICTED: protein AHNAK2-like [Gallus gallus]	261	272545	12	6	6	3	3.2	5.01	0.09	Quantitation summary for protein	129/126	0.832	2	1.046		130/126	0.859	2	1.281		131/126	0.973	2	1.059		129/127	0.8	2	1.118		130/127	0.842	2	1.37		131/127	0.945	2	1.132		129/128	0.808	2	1.22		130/128	0.846
1126	gi|347361001	vesicle-fusing ATPase [Gallus gallus]	260	96158	12	9	6	4	6.9	6.38	0.18	Quantitation summary for protein	129/126	1.004	10	1.047		130/126	0.953	9	1.038	*	131/126	1.109	10	1.068	*	129/127	0.913	10	1.03	*	130/127	0.939	10	1.078	*	131/127	1.018	10	1.071		129/128	0.978	9	1.016	*	130/128	1.006
1127	gi|310772245	enoyl-CoA hydratase domain-containing protein 3, mitochondrial [Gallus gallus]	259	35947	13	12	5	4	13.8	8.65	0.42	Quantitation summary for protein	129/126	1.01	12	1.044		130/126	1.06	12	1.041	*	131/126	1.018	12	1.078		129/127	0.928	12	1.05	*	130/127	0.995	12	1.077		131/127	0.945	12	1.11		129/128	0.929	12	1.046	*	130/128	0.989
1128	gi|471434827	chromosome 1 open reading frame, human C11orf54 [Gallus gallus]	259	41072	14	10	6	5	24.7	6.16	0.72	Quantitation summary for protein	129/126	0.804	11	1.11	*	130/126	0.864	11	1.087	*	131/126	0.999	10	1.062		129/127	0.956	11	1.054	*	130/127	1.049	11	1.052	*	131/127	1.231	11	1.074	*	129/128	0.886	11	[1.090]		130/128	0.966
1129	gi|60099195	hypothetical protein RCJMB04_33l24 [Gallus gallus]	258	54942	14	9	5	3	12.1	6.5	0.26	Quantitation summary for protein	129/126	1.271	4	[1.052]		130/126	0.95	4	1.029	*	131/126	1.076	4	1.036	*	129/127	1.544	4	1.105	*	130/127	1.179	4	1.104	*	131/127	1.32	4	1.116	*	129/128	1.078	4	1.03	*	130/128	0.817
1130	gi|363742151	PREDICTED: LOW QUALITY PROTEIN: ankyrin-1 [Gallus gallus]	258	245833	10	7	5	4	2.6	6.05	0.05	Quantitation summary for protein	129/126	1.134	7	1.119	*	130/126	1.012	7	1.142		131/126	0.963	7	[1.136]		129/127	0.959	7	1.098		130/127	0.874	7	1.105	*	131/127	0.764	6	1.074	*	129/128	1.254	7	1.084	*	130/128	1.135
1131	gi|53128745	hypothetical protein RCJMB04_5c4 [Gallus gallus]	258	63059	12	11	4	4	9.6	5.89	0.23	Quantitation summary for protein	129/126	1.05	10	1.028	*	130/126	0.784	10	1.11	*	131/126	0.857	10	[1.142]		129/127	1.21	10	1.085	*	130/127	0.922	10	1.052	*	131/127	0.997	10	[1.075]		129/128	1.066	10	1.045	*	130/128	0.807
1132	gi|53130374	hypothetical protein RCJMB04_7f5 [Gallus gallus]	257	69597	12	9	5	4	11.3	5.17	0.32	Quantitation summary for protein	129/126	1.057	9	1.076		130/126	0.968	9	1.111		131/126	1.008	9	1.09		129/127	1.115	9	1.067	*	130/127	1.042	9	1.169		131/127	1.074	9	1.125		129/128	1.116	9	1.059	*	130/128	1.036
1133	gi|118086101	PREDICTED: 60S ribosomal protein L14 [Gallus gallus]	257	24913	17	8	7	3	37.9	10.55	0.88	Quantitation summary for protein	129/126	1.642	11	[1.138]		130/126	1.402	11	1.112	*	131/126	1.413	11	[1.085]		129/127	0.94	11	1.029	*	130/127	0.819	11	1.107	*	131/127	0.816	11	1.094	*	129/128	1.193	11	[1.069]		130/128	1.033
1134	gi|302486333	suppressor of G2 allele of SKP1 homolog [Gallus gallus]	257	45094	13	9	5	3	16.2	5.48	0.42	Quantitation summary for protein	129/126	1.099	11	1.058	*	130/126	0.915	11	1.132	*	131/126	0.985	11	[1.102]		129/127	1.017	10	1.037		130/127	0.863	11	1.114	*	131/127	0.918	11	1.092	*	129/128	0.943	11	1.041	*	130/128	0.797
1135	gi|50761104	PREDICTED: homer protein homolog 3 isoform 3 [Gallus gallus]	257	46238	17	10	9	5	22.1	5.19	0.73	Quantitation summary for protein	129/126	1.276	13	[1.141]		130/126	1.425	13	1.053	*	131/126	1.083	13	[1.119]		129/127	0.701	12	1.045	*	130/127	0.812	13	[1.193]		131/127	0.61	13	1.069	*	129/128	0.81	13	[1.037]		130/128	0.917
1136	gi|363747023	PREDICTED: probable cation-transporting ATPase 13A1 [Gallus gallus]	256	148368	33	18	6	6	6.7	8.46	0.22	Quantitation summary for protein	129/126	0.747	19	1.221	*	130/126	0.81	18	1.215	*	131/126	0.824	19	1.221	*	129/127	0.806	19	1.189	*	130/127	0.892	19	1.198	*	131/127	0.898	19	1.199	*	129/128	0.781	19	1.218	*	130/128	0.859
1137	gi|363739648	PREDICTED: nucleoside diphosphate kinase 3 [Gallus gallus]	256	21494	17	7	2	2	13	6.91	0.78	Quantitation summary for protein	129/126	1.022	4	1.24		130/126	1.092	4	1.137		131/126	1.009	4	1.125		129/127	1.123	4	1.153		130/127	1.226	4	[1.197]		131/127	1.121	4	1.16		129/128	0.733	4	1.139	*	130/128	0.795
1138	gi|53126205	hypothetical protein RCJMB04_1b5 [Gallus gallus]	256	19708	16	13	7	6	41.7	5.43	1.57	Quantitation summary for protein	129/126	1.182	14	1.036	*	130/126	0.989	14	[1.050]		131/126	1.13	13	1.033	*	129/127	1.107	14	1.05	*	130/127	0.945	14	1.047	*	131/127	1.058	14	1.045	*	129/128	1.102	14	1.021	*	130/128	0.935
1139	gi|50755667	PREDICTED: NADH dehydrogenase [ubiquinone] 1 beta subcomplex subunit 10 [Gallus gallus]	256	23290	14	12	4	3	21.1	5.98	0.96	Quantitation summary for protein	129/126	0.843	12	1.07	*	130/126	1.135	12	1.055	*	131/126	0.892	12	1.068	*	129/127	0.961	12	1.037	*	130/127	1.321	12	1.101	*	131/127	1.027	12	1.042	*	129/128	0.918	12	1.051	*	130/128	1.254
1140	gi|53130752	hypothetical protein RCJMB04_9n21 [Gallus gallus]	255	45435	25	15	12	9	29.4	6.48	1.16	Quantitation summary for protein	129/126	1.195	20	1.052	*	130/126	0.94	20	1.041	*	131/126	1.079	20	1.049	*	129/127	1.19	19	1.027	*	130/127	0.95	20	[1.041]		131/127	1.08	20	1.05	*	129/128	1.119	20	[1.049]		130/128	0.893
1141	gi|53127716	hypothetical protein RCJMB04_3b8 [Gallus gallus]	255	42099	13	11	6	6	21.5	6.03	0.57	Quantitation summary for protein	129/126	0.897	12	1.072	*	130/126	1.035	11	1.068		131/126	0.783	12	1.079	*	129/127	1.027	12	1.064		130/127	1.078	12	[1.105]		131/127	0.995	11	1.047		129/128	1.074	12	1.053	*	130/128	1.121
1142	gi|53135325	hypothetical protein RCJMB04_24n15 [Gallus gallus]	254	64023	15	13	5	4	11.6	5.74	0.42	Quantitation summary for protein	129/126	1.007	5	1.017		130/126	1.027	5	1.044		131/126	0.971	5	[1.038]		129/127	0.974	5	1.019	*	130/127	1.014	5	1.042		131/127	0.948	5	[1.034]		129/128	1.181	5	1.031	*	130/128	1.222
1143	gi|118092708	PREDICTED: protein transport protein Sec31B isoform 1 [Gallus gallus]	254	145893	21	14	10	7	8.1	6.24	0.22	Quantitation summary for protein	129/126	0.974	16	1.041	*	130/126	0.941	16	1.078	*	131/126	0.918	16	1.075	*	129/127	0.897	16	[1.037]		130/127	0.885	16	[1.066]		131/127	0.854	16	1.056	*	129/128	1.11	16	1.035	*	130/128	1.088
1144	gi|252484	H beta 58 homolog [chickens, Peptide, 327 aa]	253	44849	11	10	1	1	3.7	6.13	0.07	Quantitation summary for protein	129/126	1.084	11	1.027	*	130/126	1.033	11	1.025	*	131/126	1.099	11	1.018	*	129/127	1.041	11	1.017	*	130/127	1.012	11	1.026		131/127	1.065	11	1.022	*	129/128	1.027	11	1.015	*	130/128	0.993
1145	gi|60099159	hypothetical protein RCJMB04_30e16 [Gallus gallus]	253	108727	12	11	6	6	8.3	5.07	0.19	Quantitation summary for protein	129/126	0.928	12	[1.072]		130/126	0.779	12	[1.088]		131/126	0.743	12	1.099	*	129/127	0.907	12	1.05	*	130/127	0.777	12	1.065	*	131/127	0.733	12	1.084	*	129/128	1.182	12	1.029	*	130/128	1.007
1146	gi|363733928	PREDICTED: eukaryotic translation initiation factor 4E-1A [Gallus gallus]	253	50514	12	10	5	4	12.7	10.24	0.37	Quantitation summary for protein	129/126	1.177	12	[1.135]		130/126	0.806	12	1.131	*	131/126	0.855	12	1.109	*	129/127	1.128	12	[1.165]		130/127	0.748	11	1.099	*	131/127	0.793	11	1.072	*	129/128	0.959	12	1.044	*	130/128	0.666
1147	gi|5114446	DEAD-box RNA helicase [Gallus gallus]	252	74942	13	13	5	5	7.6	8.93	0.29	Quantitation summary for protein	129/126	1.559	2	1.061		130/126	1.42	2	1.223		131/126	1.449	2	1.107		129/127	0.746	2	1.109		130/127	0.694	2	1.04	*	131/127	0.7	2	1.062		129/128	0.859	2	1.004	*	130/128	0.794
1148	gi|53135369	hypothetical protein RCJMB04_24p12 [Gallus gallus]	252	25240	13	12	7	7	31.3	5.27	1.71	Quantitation summary for protein	129/126	0.812	3	1.238		130/126	1.007	3	1.454		131/126	1.029	3	1.254		129/127	0.95	3	1.167		130/127	1.202	3	1.564		131/127	1.215	3	1.333		129/128	1.491	3	1.167	*	130/128	1.875
1149	gi|53130756	hypothetical protein RCJMB04_9o2 [Gallus gallus]	252	82148	12	12	5	5	9	4.66	0.22	Quantitation summary for protein	129/126	0.818	12	1.046	*	130/126	0.836	12	1.044	*	131/126	0.781	12	1.049	*	129/127	0.855	12	1.043	*	130/127	0.892	12	1.047	*	131/127	0.824	12	1.037	*	129/128	0.922	12	1.038	*	130/128	0.956
1150	gi|53127281	hypothetical protein RCJMB04_1k10 [Gallus gallus]	250	77579	16	13	9	7	15.3	5.04	0.45	Quantitation summary for protein	129/126	0.987	15	1.04		130/126	0.739	15	1.111	*	131/126	0.75	15	1.101	*	129/127	0.886	15	1.048	*	130/127	0.678	15	1.118	*	131/127	0.68	15	1.109	*	129/128	0.838	15	1.046	*	130/128	0.637
1151	gi|53131944	hypothetical protein RCJMB04_12g8 [Gallus gallus]	250	43984	11	8	5	3	16.5	7.66	0.44	Quantitation summary for protein	129/126	1.02	10	1.065		130/126	1.071	10	1.066	*	131/126	1.138	10	1.055	*	129/127	0.994	10	1.034		130/127	1.097	9	1.022	*	131/127	1.12	10	1.044	*	129/128	1.032	10	1.065		130/128	1.099
1152	gi|363738411	PREDICTED: vacuolar protein sorting-associated protein 4A [Gallus gallus]	250	61333	22	17	5	5	10.8	8.77	0.37	Quantitation summary for protein	129/126	0.92	4	1.075		130/126	1.024	4	1.094		131/126	0.984	4	1.05		129/127	0.906	4	[1.043]		130/127	1.029	4	1.075		131/127	0.979	4	1.061		129/128	0.859	4	1.157		130/128	0.97
1153	gi|60098521	hypothetical protein RCJMB04_3i14 [Gallus gallus]	250	61168	8	8	3	3	9	7.21	0.17	Quantitation summary for protein	129/126	1.184	8	1.027	*	130/126	1.09	8	[1.144]		131/126	1.043	8	1.087		129/127	0.848	8	1.045	*	130/127	0.797	8	[1.167]		131/127	0.755	8	1.105	*	129/128	0.948	8	1.072		130/128	0.885
1154	gi|1915894	tom-1B protein [Gallus gallus]	249	62258	10	9	4	4	10.9	5.08	0.23	Quantitation summary for protein	129/126	1.144	10	[1.097]		130/126	0.668	9	1.14	*	131/126	0.913	10	[1.161]		129/127	0.946	10	1.059	*	130/127	0.569	10	1.183	*	131/127	0.763	10	[1.105]		129/128	0.971	10	1.028	*	130/128	0.58
1155	gi|313760636	protein-cysteine N-palmitoyltransferase HHAT-like protein [Gallus gallus]	249	63690	8	7	3	3	6.6	7.18	0.29	Quantitation summary for protein	129/126	0.842	7	1.082	*	130/126	0.87	7	1.074	*	131/126	0.781	7	1.109	*	129/127	0.914	6	1.048	*	130/127	0.972	7	1.147		131/127	0.863	7	1.1	*	129/128	1.065	7	1.053	*	130/128	1.117
1156	gi|63033	aldehyde dehydrogenase 1 (NAD+) [Gallus gallus]	248	66713	18	16	5	4	8.1	7.49	0.33	Quantitation summary for protein	129/126	0.441	5	1.226	*	130/126	0.428	5	1.537	*	131/126	0.477	5	1.366	*	129/127	0.663	5	1.097	*	130/127	0.658	5	1.361	*	131/127	0.725	5	1.206	*	129/128	0.306	5	1.394	*	130/128	0.301
1157	gi|5669678	ubiquitous nuclear protein [Gallus gallus]	248	125794	11	11	6	6	6.8	4.98	0.2	Quantitation summary for protein	129/126	1.192	10	[1.064]		130/126	1.065	9	1.052	*	131/126	0.99	10	1.051		129/127	1.142	10	1.094	*	130/127	1.089	10	[1.104]		131/127	0.958	10	1.048	*	129/128	0.871	10	1.048	*	130/128	0.826
1158	gi|206597436	collagen alpha-1(III) chain precursor [Gallus gallus]	248	155362	10	6	6	4	4.5	7.69	0.13	Quantitation summary for protein	129/126	2.678	8	1.183	*	130/126	2.709	8	1.241	*	131/126	3.165	8	1.201	*	129/127	1.921	8	1.22	*	130/127	1.983	8	1.268	*	131/127	2.293	8	1.229	*	129/128	1.642	8	1.14	*	130/128	1.685
1159	gi|50752811	PREDICTED: ras-related protein Rab-8B [Gallus gallus]	247	27398	10	8	5	3	20.9	5.43	0.58	Quantitation summary for protein	129/126	---	1	---		130/126	---	1	---		131/126	---	1	---		129/127	---	1	---		130/127	---	1	---		131/127	---	1	---		129/128	---	1	---		130/128	---
1160	gi|118101506	PREDICTED: SH3 domain binding glutamic acid-rich protein like 3 [Gallus gallus]	247	12347	8	8	2	2	24.7	5.09	0.63	Quantitation summary for protein	129/126	0.96	7	1.023	*	130/126	0.983	8	1.099		131/126	1.433	8	[1.032]		129/127	0.925	8	1.024	*	130/127	0.935	8	[1.125]		131/127	1.348	8	1.045	*	129/128	0.982	8	1.026		130/128	0.987
1161	gi|382545825	60S ribosomal protein L9 [Gallus gallus]	246	25832	15	9	8	5	51	10.08	1.64	Quantitation summary for protein	129/126	1.518	11	1.21	*	130/126	1.405	11	1.158	*	131/126	1.436	11	1.169	*	129/127	0.84	12	[1.120]		130/127	0.793	11	1.191	*	131/127	0.805	11	1.078	*	129/128	1	11	1.043		130/128	0.931
1162	gi|517085	alpha-actinin [Gallus gallus]	246	117087	10	10	5	5	6.2	5.13	0.21	Quantitation summary for protein	129/126	---	1	---		130/126	---	1	---		131/126	---	1	---		129/127	---	1	---		130/127	---	1	---		131/127	---	1	---		129/128	---	1	---		130/128	---
1163	gi|363743597	PREDICTED: peptidyl-prolyl cis-trans isomerase FKBP10-like isoform 1 [Gallus gallus]	246	68327	12	10	5	5	8	5.23	0.26	Quantitation summary for protein	129/126	0.935	12	1.029	*	130/126	0.874	12	1.055	*	131/126	1.247	12	[1.024]		129/127	0.767	12	1.034	*	130/127	0.731	12	1.06	*	131/127	1.032	12	1.037	*	129/128	0.972	12	[1.022]		130/128	0.922
1164	gi|363746935	PREDICTED: UV excision repair protein RAD23 homolog A-like [Gallus gallus]	246	25022	20	16	3	3	18.2	4.22	0.65	Quantitation summary for protein	129/126	1.114	19	1.088	*	130/126	1.152	20	1.084	*	131/126	1.146	20	1.048	*	129/127	1.102	20	1.068	*	130/127	1.172	20	1.063	*	131/127	1.153	20	1.067	*	129/128	1.155	20	1.061	*	130/128	1.22
1165	gi|118095622	PREDICTED: ribosomal protein S27-like [Gallus gallus]	245	11945	17	17	1	1	9.5	9.65	0.29	Quantitation summary for protein	129/126	1.02	17	1.025	*	130/126	1.161	17	1.02	*	131/126	1.144	15	1.014	*	129/127	0.732	17	1.028	*	130/127	0.851	17	1.028	*	131/127	0.833	17	1.023	*	129/128	0.906	17	1.024	*	130/128	1.046
1166	gi|310772257	cytochrome c oxidase subunit 6C [Gallus gallus]	245	10676	12	6	3	2	31.2	10.08	3.07	Quantitation summary for protein	129/126	0.948	10	1.062	*	130/126	0.939	10	1.151		131/126	0.964	10	[1.141]		129/127	0.98	9	1.029		130/127	1.08	9	1.104	*	131/127	1	10	1.123		129/128	1.11	10	1.026	*	130/128	1.222
1167	gi|34604138	phosphohippolin-like protein [Gallus gallus]	244	11293	5	5	1	1	23.2	4.81	0.3	Quantitation summary for protein	129/126	1.128	5	1.036	*	130/126	1.271	5	1.07	*	131/126	0.937	5	1.091		129/127	1.015	4	1.048		130/127	1.204	5	1.071	*	131/127	0.878	5	[1.083]		129/128	1.193	5	1.206		130/128	1.363
1168	gi|118092613	PREDICTED: GTP-binding protein SAR1a [Gallus gallus]	244	25470	18	15	3	3	15.2	6.21	0.45	Quantitation summary for protein	129/126	0.894	7	1.031	*	130/126	0.931	7	1.032	*	131/126	0.889	7	1.04	*	129/127	0.814	7	1.037	*	130/127	0.866	7	1.022	*	131/127	0.818	7	1.054	*	129/128	1.033	7	1.044		130/128	1.065
1169	gi|53133862	hypothetical protein RCJMB04_21b8 [Gallus gallus]	244	80231	7	4	4	2	9.5	8.62	0.22	Quantitation summary for protein	129/126	1.262	6	1.178	*	130/126	0.933	6	1.075		131/126	0.897	6	1.068	*	129/127	1.064	7	1.051	*	130/127	0.809	7	1.136	*	131/127	0.775	7	1.185	*	129/128	1.085	7	1.086	*	130/128	0.82
1170	gi|50746903	PREDICTED: CDGSH iron-sulfur domain-containing protein 2 [Gallus gallus]	243	19132	12	11	4	4	35.8	9.66	0.92	Quantitation summary for protein	129/126	0.886	12	1.083	*	130/126	0.801	12	[1.077]		131/126	0.756	12	1.041	*	129/127	1.044	12	1.057	*	130/127	0.963	12	1.095		131/127	0.9	12	[1.056]		129/128	1.193	12	[1.048]		130/128	1.094
1171	gi|60098467	hypothetical protein RCJMB04_2k8 [Gallus gallus]	243	28491	9	8	4	3	16.4	9.17	0.56	Quantitation summary for protein	129/126	---	1	---		130/126	---	1	---		131/126	---	1	---		129/127	---	1	---		130/127	---	1	---		131/127	---	1	---		129/128	---	1	---		130/128	---
1172	gi|53127480	hypothetical protein RCJMB04_2j2 [Gallus gallus]	243	21166	26	12	9	5	49.3	9.87	3.35	Quantitation summary for protein	129/126	1.047	19	1.073	*	130/126	1.052	19	[1.113]		131/126	1.101	19	[1.087]		129/127	1.155	19	1.07	*	130/127	1.184	19	[1.108]		131/127	1.226	19	[1.075]		129/128	0.792	18	1.047	*	130/128	0.813
1173	gi|10120848	Chain A, Crystal Structure Of The Vinculin Tail And A Pathway For Activation	242	25047	19	15	9	8	37.2	9.17	1.72	Quantitation summary for protein	129/126	---	0	---		130/126	---	0	---		131/126	---	0	---		129/127	---	0	---		130/127	---	0	---		131/127	---	0	---		129/128	---	0	---		130/128	---
1174	gi|459683832	AD012Z protein [Gallus gallus]	242	125862	12	10	5	4	4.6	6.28	0.14	Quantitation summary for protein	129/126	1.374	11	1.055	*	130/126	1.607	11	1.088	*	131/126	1.516	11	1.054	*	129/127	0.952	11	[1.103]		130/127	1.137	11	[1.131]		131/127	1.061	11	[1.091]		129/128	0.973	11	1.043		130/128	1.155
1175	gi|83743084	carnitine palmitoyltransferase I [Gallus gallus]	242	29398	11	10	2	2	8.1	8.68	0.38	Quantitation summary for protein	129/126	1.074	10	1.023	*	130/126	0.985	10	1.048		131/126	0.982	10	1.06		129/127	0.991	10	1.026		130/127	0.927	10	1.042	*	131/127	0.915	10	1.043	*	129/128	0.985	10	[1.040]		130/128	0.915
1176	gi|50729026	PREDICTED: bcl-2-like protein 13 [Gallus gallus]	241	58366	10	9	3	2	5.3	4.61	0.12	Quantitation summary for protein	129/126	0.53	9	1.142	*	130/126	1.293	9	1.113	*	131/126	0.863	9	1.064	*	129/127	0.624	9	1.137	*	130/127	1.552	9	1.123	*	131/127	1.025	9	1.072		129/128	1.378	9	[1.153]		130/128	3.408
1177	gi|118091958	PREDICTED: alpha-1-antiproteinase 2 [Gallus gallus]	241	56642	13	9	7	5	17.9	6.71	0.49	Quantitation summary for protein	129/126	1.42	10	1.062	*	130/126	0.976	11	1.115		131/126	1.065	11	1.108		129/127	1.361	11	[1.101]		130/127	0.869	11	1.06	*	131/127	0.977	10	1.066		129/128	1.022	11	1.042		130/128	0.649
1178	gi|53132397	hypothetical protein RCJMB04_13f15 [Gallus gallus]	240	37235	14	11	4	4	10.8	8.67	0.53	Quantitation summary for protein	129/126	0.935	11	1.065	*	130/126	1.013	12	1.08		131/126	0.882	12	1.072	*	129/127	0.91	12	1.081	*	130/127	1.054	12	[1.083]		131/127	0.907	12	1.1	*	129/128	0.932	12	1.079	*	130/128	1.073
1179	gi|53127298	hypothetical protein RCJMB04_1l14 [Gallus gallus]	239	67314	29	23	6	5	9.3	4.93	0.33	Quantitation summary for protein	129/126	1.103	12	1.034	*	130/126	0.916	12	1.067	*	131/126	0.938	12	1.031	*	129/127	0.957	12	1.023	*	130/127	0.811	12	1.076	*	131/127	0.822	12	1.036	*	129/128	0.983	12	1.026	*	130/128	0.827
1180	gi|87196326	vesicle-associated membrane protein 3 [Gallus gallus]	239	13800	9	9	3	3	38.5	9.25	1.43	Quantitation summary for protein	129/126	0.896	6	1.154		130/126	0.752	6	1.133	*	131/126	0.813	6	1.18	*	129/127	1.069	6	1.067		130/127	0.915	6	1.06	*	131/127	0.979	6	1.125		129/128	1.321	6	1.072	*	130/128	1.125
1181	gi|53127340	hypothetical protein RCJMB04_1o7 [Gallus gallus]	238	25702	17	16	4	4	19.1	9.18	0.84	Quantitation summary for protein	129/126	0.929	15	1.062	*	130/126	1.172	14	1.055	*	131/126	1.107	15	1.065	*	129/127	0.836	15	1.057	*	130/127	1.077	14	1.039	*	131/127	1.006	15	1.059		129/128	0.876	15	[1.049]		130/128	1.118
1182	gi|363735331	PREDICTED: STE20-like kinase isoform 2 [Gallus gallus]	238	177150	18	7	13	6	10.5	5.01	0.18	Quantitation summary for protein	129/126	1.043	10	1.091		130/126	0.853	10	1.098	*	131/126	0.891	10	1.073	*	129/127	0.921	10	1.05	*	130/127	0.769	10	1.111	*	131/127	0.794	10	1.056	*	129/128	0.991	10	1.064		130/128	0.823
1183	gi|53135540	hypothetical protein RCJMB04_25f12 [Gallus gallus]	238	39789	11	10	4	3	14	4.99	0.27	Quantitation summary for protein	129/126	1.153	10	1.071	*	130/126	0.881	10	1.1	*	131/126	1.003	10	1.069		129/127	0.971	10	1.045		130/127	0.757	10	[1.127]		131/127	0.853	10	[1.104]		129/128	0.984	10	1.031		130/128	0.763
1184	gi|50752072	PREDICTED: vesicle-associated membrane protein 1 [Gallus gallus]	238	14693	8	8	3	3	35.1	9.03	0.87	Quantitation summary for protein	129/126	0.932	5	1.162		130/126	0.762	5	1.058	*	131/126	0.788	5	1.136	*	129/127	1.096	5	1.109		130/127	0.914	5	1.085		131/127	0.936	5	1.15		129/128	1.337	5	1.19	*	130/128	1.109
1185	gi|50761098	PREDICTED: armadillo repeat-containing protein 6 isoform 2 [Gallus gallus]	236	56739	9	9	3	3	9.9	4.93	0.18	Quantitation summary for protein	129/126	1.086	9	1.056	*	130/126	1.063	9	1.093		131/126	0.948	9	1.032	*	129/127	1.017	9	1.053		130/127	1.016	9	1.09		131/127	0.897	9	[1.058]		129/128	1.179	8	1.05	*	130/128	1.2
1186	gi|53127758	hypothetical protein RCJMB04_3e19 [Gallus gallus]	236	46970	9	8	5	5	13.5	6.2	0.4	Quantitation summary for protein	129/126	1.344	7	1.038	*	130/126	0.979	8	1.059		131/126	1.195	8	1.081	*	129/127	1.14	7	1.023	*	130/127	0.918	8	1.08	*	131/127	1.108	8	1.098	*	129/128	1.088	8	[1.045]		130/128	0.838
1187	gi|363743798	PREDICTED: UPF0449 protein C19orf25 homolog [Gallus gallus]	236	13769	5	5	1	1	14.2	5.63	0.25	Quantitation summary for protein	129/126	1.046	5	[1.085]		130/126	0.805	5	1.063	*	131/126	0.83	5	1.092	*	129/127	1.183	5	1.046	*	130/127	0.929	5	1.103		131/127	0.948	5	1.119		129/128	1.036	5	1.06		130/128	0.808
1188	gi|363744215	PREDICTED: 28S ribosomal protein S36, mitochondrial [Gallus gallus]	236	13472	11	11	4	4	35.5	10.27	1.48	Quantitation summary for protein	129/126	0.815	11	1.069	*	130/126	1.118	11	1.153	*	131/126	0.878	11	1.145	*	129/127	0.93	10	1.028	*	130/127	1.312	11	1.198	*	131/127	1.019	11	[1.167]		129/128	0.94	11	1.069	*	130/128	1.308
1189	gi|363731890	PREDICTED: LOW QUALITY PROTEIN: geranylgeranyl pyrophosphate synthase [Gallus gallus]	236	40143	15	11	5	4	16.1	5.56	0.49	Quantitation summary for protein	129/126	0.927	11	1.049	*	130/126	0.871	10	[1.047]		131/126	0.822	11	1.028	*	129/127	0.968	11	1.066		130/127	0.926	10	1.032	*	131/127	0.866	11	[1.069]		129/128	0.939	11	[1.084]		130/128	0.895
1190	gi|363729389	PREDICTED: dipeptidyl peptidase 1 [Gallus gallus]	235	58056	15	11	5	4	9.8	7.85	0.32	Quantitation summary for protein	129/126	1.282	12	1.028	*	130/126	1.009	12	1.058		131/126	1.323	12	1.033	*	129/127	1.25	12	1.041	*	130/127	1.003	12	1.073		131/127	1.301	12	1.048	*	129/128	0.987	12	1.019	*	130/128	0.787
1191	gi|50754473	PREDICTED: mitochondrial carnitine/acylcarnitine carrier protein [Gallus gallus]	235	37056	11	10	3	3	8.3	9.51	0.29	Quantitation summary for protein	129/126	1.043	11	1.033	*	130/126	0.935	11	1.073	*	131/126	0.96	11	[1.034]		129/127	1.011	11	1.036		130/127	0.925	11	1.07	*	131/127	0.919	10	1.021	*	129/128	1.306	11	1.023	*	130/128	1.187
1192	gi|211987	immunoglobulin heavy chain V-region, partial [Gallus gallus]	234	12794	12	9	3	3	36	7.86	1.59	Quantitation summary for protein	129/126	---	0	---		130/126	---	0	---		131/126	---	0	---		129/127	---	0	---		130/127	---	0	---		131/127	---	0	---		129/128	---	0	---		130/128	---
[truncated: 1,646 more rows]
[truncated: 8 more columns]

## Sheet: Quantified proteins
Header	--------------------------------------------------------
Search title	Gallus TMT6plex Jan15
Timestamp	2015-01-20T21:40:12Z
User	Sheng
Email	sz14
[truncated: 2,322 more rows]
[truncated: 7 more columns]

## Sheet: Labeling information
Sample	Label tag
Control 1	126
Control 2	127
Control 3	128
[truncated: 3 more rows]
